# Supplementary material for: A task-general connectivity model reveals variation in convergence of cortical inputs to functional regions of the cerebellum
Source: eLife. 2023 Apr 21;12:e81511. doi: 10.7554/eLife.81511 (PMC10129326; doi:10.7554/eLife.81511)
Supplement: Figure 2—figure supplement 4—source data 1. [file elife-81511-fig2-figsupp4-data1.csv]

subj_id	rmse_train	R_train	num_regions	rmse_cv	R_cv	name	model	glm	train_exp	averaging	weighting	incl_inst	X_data	Y_data	validate_model	cv_fold	mode	save_weights	hyperparameter	timestamp
s02	0.26896072494023643	0.668877904585067	17	0.38263117418004344	0.34415376897166067	lasso_yeo17_alpha_-5	LASSO	glm7	sc1	sess	True	True	yeo17	cerebellum_suit	True	4	crossed	False	-5	Thu Dec 2 21:10:03 2021
s03	0.30167711725772833	0.6966289185764653	17	0.44558193519259226	0.40237460313572465	lasso_yeo17_alpha_-5	LASSO	glm7	sc1	sess	True	True	yeo17	cerebellum_suit	True	4	crossed	False	-5	Thu Dec 2 21:10:23 2021
s04	0.27236188159982017	0.612249917398917	17	0.4136267885152681	0.15355001942501675	lasso_yeo17_alpha_-5	LASSO	glm7	sc1	sess	True	True	yeo17	cerebellum_suit	True	4	crossed	False	-5	Thu Dec 2 21:10:43 2021
s06	0.246350104268018	0.70256582885169	17	0.3662120634169275	0.3871184718339854	lasso_yeo17_alpha_-5	LASSO	glm7	sc1	sess	True	True	yeo17	cerebellum_suit	True	4	crossed	False	-5	Thu Dec 2 21:11:02 2021
s08	0.34129968193313026	0.6039218098043388	17	0.4715849284501992	0.22337465702083226	lasso_yeo17_alpha_-5	LASSO	glm7	sc1	sess	True	True	yeo17	cerebellum_suit	True	4	crossed	False	-5	Thu Dec 2 21:11:27 2021
s09	0.2642467765366691	0.664348890850763	17	0.3590786804355109	0.3863276723305464	lasso_yeo17_alpha_-5	LASSO	glm7	sc1	sess	True	True	yeo17	cerebellum_suit	True	4	crossed	False	-5	Thu Dec 2 21:11:47 2021
s10	0.2854571128909118	0.7007017786415305	17	0.4047953140762957	0.4109937974637813	lasso_yeo17_alpha_-5	LASSO	glm7	sc1	sess	True	True	yeo17	cerebellum_suit	True	4	crossed	False	-5	Thu Dec 2 21:12:09 2021
s12	0.29512142321066287	0.6327184234193189	17	0.4233769628404401	0.25504691301671645	lasso_yeo17_alpha_-5	LASSO	glm7	sc1	sess	True	True	yeo17	cerebellum_suit	True	4	crossed	False	-5	Thu Dec 2 21:12:29 2021
s14	0.2839091202904383	0.6076893295344314	17	0.386371754562741	0.2559202040725394	lasso_yeo17_alpha_-5	LASSO	glm7	sc1	sess	True	True	yeo17	cerebellum_suit	True	4	crossed	False	-5	Thu Dec 2 21:12:51 2021
s15	0.29438417798402966	0.6283109020480823	17	0.4247170793067899	0.21958017520619466	lasso_yeo17_alpha_-5	LASSO	glm7	sc1	sess	True	True	yeo17	cerebellum_suit	True	4	crossed	False	-5	Thu Dec 2 21:13:11 2021
s17	0.2951026710645505	0.6953825998442438	17	0.4341333138793327	0.40455110020045026	lasso_yeo17_alpha_-5	LASSO	glm7	sc1	sess	True	True	yeo17	cerebellum_suit	True	4	crossed	False	-5	Thu Dec 2 21:13:30 2021
s18	0.24090168878245774	0.6175391154906145	17	0.34081543938820114	0.20639093793261698	lasso_yeo17_alpha_-5	LASSO	glm7	sc1	sess	True	True	yeo17	cerebellum_suit	True	4	crossed	False	-5	Thu Dec 2 21:13:47 2021
s19	0.23480848745503105	0.6002258618302386	17	0.31126580940428067	0.31024187855548135	lasso_yeo17_alpha_-5	LASSO	glm7	sc1	sess	True	True	yeo17	cerebellum_suit	True	4	crossed	False	-5	Thu Dec 2 21:14:05 2021
s20	0.269101566737383	0.6487695114331078	17	0.3654372112006001	0.37081308433283794	lasso_yeo17_alpha_-5	LASSO	glm7	sc1	sess	True	True	yeo17	cerebellum_suit	True	4	crossed	False	-5	Thu Dec 2 21:14:24 2021
s21	0.31650299619476696	0.570570647855287	17	0.4706524633123317	0.06180847450001098	lasso_yeo17_alpha_-5	LASSO	glm7	sc1	sess	True	True	yeo17	cerebellum_suit	True	4	crossed	False	-5	Thu Dec 2 21:14:44 2021
s22	0.2914991446767381	0.7423281396108163	17	0.4516425238551709	0.44688382422898976	lasso_yeo17_alpha_-5	LASSO	glm7	sc1	sess	True	True	yeo17	cerebellum_suit	True	4	crossed	False	-5	Thu Dec 2 21:15:02 2021
s24	0.2981999467764528	0.6233765206039743	17	0.43432239246837806	0.22037304573769936	lasso_yeo17_alpha_-5	LASSO	glm7	sc1	sess	True	True	yeo17	cerebellum_suit	True	4	crossed	False	-5	Thu Dec 2 21:15:23 2021
s25	0.29235886133882993	0.6298903026581057	17	0.4393322264398516	0.17964693667301834	lasso_yeo17_alpha_-5	LASSO	glm7	sc1	sess	True	True	yeo17	cerebellum_suit	True	4	crossed	False	-5	Thu Dec 2 21:15:42 2021
s26	0.28029760336024534	0.6369337953311944	17	0.3953851557673245	0.2589544546515212	lasso_yeo17_alpha_-5	LASSO	glm7	sc1	sess	True	True	yeo17	cerebellum_suit	True	4	crossed	False	-5	Thu Dec 2 21:16:01 2021
s27	0.2691968526567841	0.6600692164220039	17	0.4015484065988127	0.2718550137666631	lasso_yeo17_alpha_-5	LASSO	glm7	sc1	sess	True	True	yeo17	cerebellum_suit	True	4	crossed	False	-5	Thu Dec 2 21:16:23 2021
s28	0.27593547283140996	0.5949604240861461	17	0.3888045211691797	0.21133279578667008	lasso_yeo17_alpha_-5	LASSO	glm7	sc1	sess	True	True	yeo17	cerebellum_suit	True	4	crossed	False	-5	Thu Dec 2 21:16:42 2021
s29	0.3788526827016801	0.6263000663076117	17	0.5881579394220224	0.17542297688022157	lasso_yeo17_alpha_-5	LASSO	glm7	sc1	sess	True	True	yeo17	cerebellum_suit	True	4	crossed	False	-5	Thu Dec 2 21:17:06 2021
s30	0.3238541678232515	0.6177608936586761	17	0.5183593701696982	0.09831738388691365	lasso_yeo17_alpha_-5	LASSO	glm7	sc1	sess	True	True	yeo17	cerebellum_suit	True	4	crossed	False	-5	Thu Dec 2 21:17:24 2021
s31	0.2772065024079357	0.5697693660367685	17	0.406162316947427	0.12064228855076557	lasso_yeo17_alpha_-5	LASSO	glm7	sc1	sess	True	True	yeo17	cerebellum_suit	True	4	crossed	False	-5	Thu Dec 2 21:17:41 2021
s02	0.2846636556595344	0.6239743643087935	17	0.3668542223322505	0.3578478310898858	lasso_yeo17_alpha_-4	LASSO	glm7	sc1	sess	True	True	yeo17	cerebellum_suit	True	4	crossed	False	-4	Thu Dec 2 21:17:54 2021
s03	0.3196871320613815	0.656805701842621	17	0.43038044675541415	0.41449314042925794	lasso_yeo17_alpha_-4	LASSO	glm7	sc1	sess	True	True	yeo17	cerebellum_suit	True	4	crossed	False	-4	Thu Dec 2 21:18:09 2021
s04	0.2900784677054691	0.5494399179883193	17	0.38943422563260593	0.18619823159598325	lasso_yeo17_alpha_-4	LASSO	glm7	sc1	sess	True	True	yeo17	cerebellum_suit	True	4	crossed	False	-4	Thu Dec 2 21:18:23 2021
s06	0.2613592511703901	0.6602359002325111	17	0.34749387921406266	0.4106567005306607	lasso_yeo17_alpha_-4	LASSO	glm7	sc1	sess	True	True	yeo17	cerebellum_suit	True	4	crossed	False	-4	Thu Dec 2 21:18:37 2021
s08	0.36375603899990233	0.5343599263294713	17	0.455240925266111	0.2204375070633355	lasso_yeo17_alpha_-4	LASSO	glm7	sc1	sess	True	True	yeo17	cerebellum_suit	True	4	crossed	False	-4	Thu Dec 2 21:18:52 2021
s09	0.2806805417249776	0.6148523242455401	17	0.34650488878700825	0.40344590516097956	lasso_yeo17_alpha_-4	LASSO	glm7	sc1	sess	True	True	yeo17	cerebellum_suit	True	4	crossed	False	-4	Thu Dec 2 21:19:07 2021
s10	0.3081045580846366	0.6409129160506578	17	0.39300769386042617	0.4073606173789999	lasso_yeo17_alpha_-4	LASSO	glm7	sc1	sess	True	True	yeo17	cerebellum_suit	True	4	crossed	False	-4	Thu Dec 2 21:19:21 2021
s12	0.313043078658295	0.5766157326700331	17	0.4049466423656299	0.26709659070950303	lasso_yeo17_alpha_-4	LASSO	glm7	sc1	sess	True	True	yeo17	cerebellum_suit	True	4	crossed	False	-4	Thu Dec 2 21:19:36 2021
s14	0.298330384361566	0.5570310742106059	17	0.36903202832759446	0.28315646324808114	lasso_yeo17_alpha_-4	LASSO	glm7	sc1	sess	True	True	yeo17	cerebellum_suit	True	4	crossed	False	-4	Thu Dec 2 21:19:50 2021
s15	0.31370919305102746	0.5664900082421762	17	0.4066043375367002	0.21974250643208643	lasso_yeo17_alpha_-4	LASSO	glm7	sc1	sess	True	True	yeo17	cerebellum_suit	True	4	crossed	False	-4	Thu Dec 2 21:20:04 2021
s17	0.3107288409264394	0.6581905798478661	17	0.4158800614035308	0.4283061923192107	lasso_yeo17_alpha_-4	LASSO	glm7	sc1	sess	True	True	yeo17	cerebellum_suit	True	4	crossed	False	-4	Thu Dec 2 21:20:19 2021
s18	0.25724695196061925	0.553649203973287	17	0.325071782133328	0.20468336964087686	lasso_yeo17_alpha_-4	LASSO	glm7	sc1	sess	True	True	yeo17	cerebellum_suit	True	4	crossed	False	-4	Thu Dec 2 21:20:32 2021
s19	0.2482403693667016	0.5406066120367308	17	0.300255603089086	0.3192996596174847	lasso_yeo17_alpha_-4	LASSO	glm7	sc1	sess	True	True	yeo17	cerebellum_suit	True	4	crossed	False	-4	Thu Dec 2 21:20:45 2021
s20	0.2840924104165434	0.6016517127466594	17	0.3528011581063715	0.3835192036085768	lasso_yeo17_alpha_-4	LASSO	glm7	sc1	sess	True	True	yeo17	cerebellum_suit	True	4	crossed	False	-4	Thu Dec 2 21:20:59 2021
s21	0.33380862890504054	0.5122201412933238	17	0.4413126004118456	0.07051064510280335	lasso_yeo17_alpha_-4	LASSO	glm7	sc1	sess	True	True	yeo17	cerebellum_suit	True	4	crossed	False	-4	Thu Dec 2 21:21:13 2021
s22	0.3080008993314845	0.7109871153537474	17	0.4304851455459163	0.4696628416540424	lasso_yeo17_alpha_-4	LASSO	glm7	sc1	sess	True	True	yeo17	cerebellum_suit	True	4	crossed	False	-4	Thu Dec 2 21:21:27 2021
s24	0.3167778456979361	0.5653055539848313	17	0.40846725496503156	0.2529928592163935	lasso_yeo17_alpha_-4	LASSO	glm7	sc1	sess	True	True	yeo17	cerebellum_suit	True	4	crossed	False	-4	Thu Dec 2 21:21:42 2021
s25	0.3093685412666712	0.5791037002544777	17	0.41484325869866834	0.20059320836223127	lasso_yeo17_alpha_-4	LASSO	glm7	sc1	sess	True	True	yeo17	cerebellum_suit	True	4	crossed	False	-4	Thu Dec 2 21:21:56 2021
s26	0.29868460212118497	0.5796350216623158	17	0.37961216466624725	0.26518273580493446	lasso_yeo17_alpha_-4	LASSO	glm7	sc1	sess	True	True	yeo17	cerebellum_suit	True	4	crossed	False	-4	Thu Dec 2 21:22:09 2021
s27	0.2921903031567854	0.5823705479577443	17	0.38246817776434605	0.2855071131300837	lasso_yeo17_alpha_-4	LASSO	glm7	sc1	sess	True	True	yeo17	cerebellum_suit	True	4	crossed	False	-4	Thu Dec 2 21:22:24 2021
s28	0.29161302652219967	0.5363265680179846	17	0.3687557211968062	0.23413678948990077	lasso_yeo17_alpha_-4	LASSO	glm7	sc1	sess	True	True	yeo17	cerebellum_suit	True	4	crossed	False	-4	Thu Dec 2 21:22:38 2021
s29	0.4010553808125161	0.5782588969817797	17	0.5601944498161208	0.16601901963645	lasso_yeo17_alpha_-4	LASSO	glm7	sc1	sess	True	True	yeo17	cerebellum_suit	True	4	crossed	False	-4	Thu Dec 2 21:22:54 2021
s30	0.3393302599783798	0.5767985591969814	17	0.4849088950367514	0.1268256033967089	lasso_yeo17_alpha_-4	LASSO	glm7	sc1	sess	True	True	yeo17	cerebellum_suit	True	4	crossed	False	-4	Thu Dec 2 21:23:08 2021
s31	0.2911705655649275	0.5173134554830989	17	0.3824991748895508	0.12632315716213974	lasso_yeo17_alpha_-4	LASSO	glm7	sc1	sess	True	True	yeo17	cerebellum_suit	True	4	crossed	False	-4	Thu Dec 2 21:23:22 2021
s02	0.30693583690933157	0.5454012390568331	17	0.3602445593132322	0.3479767690178634	lasso_yeo17_alpha_-3	LASSO	glm7	sc1	sess	True	True	yeo17	cerebellum_suit	True	4	crossed	False	-3	Thu Dec 2 21:23:33 2021
s03	0.3457011947416899	0.58545592117009	17	0.42400795136856384	0.4048906284171935	lasso_yeo17_alpha_-3	LASSO	glm7	sc1	sess	True	True	yeo17	cerebellum_suit	True	4	crossed	False	-3	Thu Dec 2 21:23:45 2021
s04	0.30995215072631155	0.4514877846577607	17	0.3729419010698417	0.20403672655533486	lasso_yeo17_alpha_-3	LASSO	glm7	sc1	sess	True	True	yeo17	cerebellum_suit	True	4	crossed	False	-3	Thu Dec 2 21:23:57 2021
s06	0.2817340079683394	0.5964521723770894	17	0.33612671665812766	0.41853846266041583	lasso_yeo17_alpha_-3	LASSO	glm7	sc1	sess	True	True	yeo17	cerebellum_suit	True	4	crossed	False	-3	Thu Dec 2 21:24:09 2021
s08	0.39131106529017107	0.4263501737978612	17	0.44392151440430105	0.1918685782386747	lasso_yeo17_alpha_-3	LASSO	glm7	sc1	sess	True	True	yeo17	cerebellum_suit	True	4	crossed	False	-3	Thu Dec 2 21:24:21 2021
s09	0.30228498683872246	0.528215327242937	17	0.343330113629724	0.3979765076650434	lasso_yeo17_alpha_-3	LASSO	glm7	sc1	sess	True	True	yeo17	cerebellum_suit	True	4	crossed	False	-3	Thu Dec 2 21:24:33 2021
s10	0.33439540168486964	0.5552883434147553	17	0.38594850964659183	0.3942889146137766	lasso_yeo17_alpha_-3	LASSO	glm7	sc1	sess	True	True	yeo17	cerebellum_suit	True	4	crossed	False	-3	Thu Dec 2 21:24:45 2021
s12	0.3350713514869467	0.48858462104469563	17	0.3910772798170597	0.28349731952670154	lasso_yeo17_alpha_-3	LASSO	glm7	sc1	sess	True	True	yeo17	cerebellum_suit	True	4	crossed	False	-3	Thu Dec 2 21:24:57 2021
s14	0.31705512607491815	0.4796304844286655	17	0.3592385594705043	0.29656558214353856	lasso_yeo17_alpha_-3	LASSO	glm7	sc1	sess	True	True	yeo17	cerebellum_suit	True	4	crossed	False	-3	Thu Dec 2 21:25:09 2021
s15	0.3384648565615887	0.4732965652373703	17	0.3953156136786513	0.20111002665612435	lasso_yeo17_alpha_-3	LASSO	glm7	sc1	sess	True	True	yeo17	cerebellum_suit	True	4	crossed	False	-3	Thu Dec 2 21:25:22 2021
s17	0.33090054557218634	0.607149851622187	17	0.4064647270710109	0.4296458011877488	lasso_yeo17_alpha_-3	LASSO	glm7	sc1	sess	True	True	yeo17	cerebellum_suit	True	4	crossed	False	-3	Thu Dec 2 21:25:34 2021
s18	0.27912146250678854	0.43692720169998606	17	0.3155441843196122	0.1913430001240173	lasso_yeo17_alpha_-3	LASSO	glm7	sc1	sess	True	True	yeo17	cerebellum_suit	True	4	crossed	False	-3	Thu Dec 2 21:25:45 2021
s19	0.26438721134236537	0.4582522450970081	17	0.2970865152123798	0.3039517338071388	lasso_yeo17_alpha_-3	LASSO	glm7	sc1	sess	True	True	yeo17	cerebellum_suit	True	4	crossed	False	-3	Thu Dec 2 21:25:57 2021
s20	0.3038248889526856	0.5228806640356037	17	0.3487918880829661	0.3718656708650958	lasso_yeo17_alpha_-3	LASSO	glm7	sc1	sess	True	True	yeo17	cerebellum_suit	True	4	crossed	False	-3	Thu Dec 2 21:26:09 2021
s21	0.3586154851972333	0.39807692538080874	17	0.41715418688186934	0.06405169795067638	lasso_yeo17_alpha_-3	LASSO	glm7	sc1	sess	True	True	yeo17	cerebellum_suit	True	4	crossed	False	-3	Thu Dec 2 21:26:21 2021
s22	0.33332911931116527	0.6544500638685823	17	0.41392869192598236	0.4872380387156287	lasso_yeo17_alpha_-3	LASSO	glm7	sc1	sess	True	True	yeo17	cerebellum_suit	True	4	crossed	False	-3	Thu Dec 2 21:26:33 2021
s24	0.3396954437263624	0.46864981193542543	17	0.3915281501365174	0.28437484096947896	lasso_yeo17_alpha_-3	LASSO	glm7	sc1	sess	True	True	yeo17	cerebellum_suit	True	4	crossed	False	-3	Thu Dec 2 21:26:46 2021
s25	0.33283291398870635	0.49085832589677847	17	0.3972961715878438	0.20412615920013136	lasso_yeo17_alpha_-3	LASSO	glm7	sc1	sess	True	True	yeo17	cerebellum_suit	True	4	crossed	False	-3	Thu Dec 2 21:26:57 2021
s26	0.3230576577449554	0.48465228964439144	17	0.3700429117627587	0.263157509032387	lasso_yeo17_alpha_-3	LASSO	glm7	sc1	sess	True	True	yeo17	cerebellum_suit	True	4	crossed	False	-3	Thu Dec 2 21:27:09 2021
s27	0.3151560957328194	0.47612788290097846	17	0.37013566197491826	0.2863609186456721	lasso_yeo17_alpha_-3	LASSO	glm7	sc1	sess	True	True	yeo17	cerebellum_suit	True	4	crossed	False	-3	Thu Dec 2 21:27:21 2021
s28	0.3108000742163808	0.4474382632037861	17	0.35427697090766996	0.24585610295686552	lasso_yeo17_alpha_-3	LASSO	glm7	sc1	sess	True	True	yeo17	cerebellum_suit	True	4	crossed	False	-3	Thu Dec 2 21:27:33 2021
s29	0.43444963574500656	0.47216250188561204	17	0.5398592731306472	0.14267801444738276	lasso_yeo17_alpha_-3	LASSO	glm7	sc1	sess	True	True	yeo17	cerebellum_suit	True	4	crossed	False	-3	Thu Dec 2 21:27:46 2021
s30	0.3631741495872489	0.5031945447275995	17	0.4550310110437106	0.15563216909208258	lasso_yeo17_alpha_-3	LASSO	glm7	sc1	sess	True	True	yeo17	cerebellum_suit	True	4	crossed	False	-3	Thu Dec 2 21:27:58 2021
s31	0.3112256211688282	0.41673139560395356	17	0.36394784817520387	0.12298914531076963	lasso_yeo17_alpha_-3	LASSO	glm7	sc1	sess	True	True	yeo17	cerebellum_suit	True	4	crossed	False	-3	Thu Dec 2 21:28:10 2021
s02	0.33197200777988095	0.41041509122829384	17	0.36574033274383294	0.2955390176983467	lasso_yeo17_alpha_-2	LASSO	glm7	sc1	sess	True	True	yeo17	cerebellum_suit	True	4	crossed	False	-2	Thu Dec 2 21:28:20 2021
s03	0.3743982187016731	0.4661930906271833	17	0.42860546478617756	0.35918912393634916	lasso_yeo17_alpha_-2	LASSO	glm7	sc1	sess	True	True	yeo17	cerebellum_suit	True	4	crossed	False	-2	Thu Dec 2 21:28:31 2021
s04	0.3267677955513169	0.32321114115399996	17	0.36986244204019875	0.17704062623156872	lasso_yeo17_alpha_-2	LASSO	glm7	sc1	sess	True	True	yeo17	cerebellum_suit	True	4	crossed	False	-2	Thu Dec 2 21:28:43 2021
s06	0.30868378495777193	0.4697269739148122	17	0.3407011412610623	0.37602829330454135	lasso_yeo17_alpha_-2	LASSO	glm7	sc1	sess	True	True	yeo17	cerebellum_suit	True	4	crossed	False	-2	Thu Dec 2 21:28:54 2021
s08	0.415532717876469	0.23608572839052616	17	0.4384048912088435	0.1550836740791222	lasso_yeo17_alpha_-2	LASSO	glm7	sc1	sess	True	True	yeo17	cerebellum_suit	True	4	crossed	False	-2	Thu Dec 2 21:29:05 2021
s09	0.32222499560931184	0.41271629219870437	17	0.3503953648231084	0.3532092131079918	lasso_yeo17_alpha_-2	LASSO	glm7	sc1	sess	True	True	yeo17	cerebellum_suit	True	4	crossed	False	-2	Thu Dec 2 21:29:16 2021
s10	0.3615612239083091	0.4193117162620354	17	0.3910938811047951	0.3498544348944085	lasso_yeo17_alpha_-2	LASSO	glm7	sc1	sess	True	True	yeo17	cerebellum_suit	True	4	crossed	False	-2	Thu Dec 2 21:29:26 2021
s12	0.35672087761410914	0.3608911715396943	17	0.389847380870289	0.2664725147159285	lasso_yeo17_alpha_-2	LASSO	glm7	sc1	sess	True	True	yeo17	cerebellum_suit	True	4	crossed	False	-2	Thu Dec 2 21:29:38 2021
s14	0.3394882702138071	0.33966804957203545	17	0.3642213447484799	0.2430323984288511	lasso_yeo17_alpha_-2	LASSO	glm7	sc1	sess	True	True	yeo17	cerebellum_suit	True	4	crossed	False	-2	Thu Dec 2 21:29:49 2021
s15	0.3646655145912892	0.2812431271386543	17	0.39543812263539974	0.1390293497867128	lasso_yeo17_alpha_-2	LASSO	glm7	sc1	sess	True	True	yeo17	cerebellum_suit	True	4	crossed	False	-2	Thu Dec 2 21:30:00 2021
s17	0.3627148153794951	0.501400642385874	17	0.41235951643110097	0.38394065954288314	lasso_yeo17_alpha_-2	LASSO	glm7	sc1	sess	True	True	yeo17	cerebellum_suit	True	4	crossed	False	-2	Thu Dec 2 21:30:12 2021
s18	0.2965437688957749	0.23555458822606512	17	0.3160886142003168	0.144084773011912	lasso_yeo17_alpha_-2	LASSO	glm7	sc1	sess	True	True	yeo17	cerebellum_suit	True	4	crossed	False	-2	Thu Dec 2 21:30:22 2021
s19	0.28135634127547027	0.2914075033200591	17	0.30418917778040444	0.21364196969290541	lasso_yeo17_alpha_-2	LASSO	glm7	sc1	sess	True	True	yeo17	cerebellum_suit	True	4	crossed	False	-2	Thu Dec 2 21:30:33 2021
s20	0.32804647764914513	0.3940425644144222	17	0.3563134411677056	0.31576206345411495	lasso_yeo17_alpha_-2	LASSO	glm7	sc1	sess	True	True	yeo17	cerebellum_suit	True	4	crossed	False	-2	Thu Dec 2 21:30:44 2021
s21	0.3772064455739728	0.20844998502377465	17	0.40695629862673355	0.043031129046017594	lasso_yeo17_alpha_-2	LASSO	glm7	sc1	sess	True	True	yeo17	cerebellum_suit	True	4	crossed	False	-2	Thu Dec 2 21:30:55 2021
s22	0.3662541008006687	0.5548761502738718	17	0.41351323260375356	0.4718788516258621	lasso_yeo17_alpha_-2	LASSO	glm7	sc1	sess	True	True	yeo17	cerebellum_suit	True	4	crossed	False	-2	Thu Dec 2 21:31:07 2021
s24	0.3590712935882694	0.35336088312224667	17	0.39164310529547647	0.26321285639332803	lasso_yeo17_alpha_-2	LASSO	glm7	sc1	sess	True	True	yeo17	cerebellum_suit	True	4	crossed	False	-2	Thu Dec 2 21:31:18 2021
s25	0.35765849664547655	0.32563379565023337	17	0.39063532745884855	0.19532573982844106	lasso_yeo17_alpha_-2	LASSO	glm7	sc1	sess	True	True	yeo17	cerebellum_suit	True	4	crossed	False	-2	Thu Dec 2 21:31:28 2021
s26	0.3474202118637454	0.3089327162462502	17	0.3719607635565635	0.22598917620519585	lasso_yeo17_alpha_-2	LASSO	glm7	sc1	sess	True	True	yeo17	cerebellum_suit	True	4	crossed	False	-2	Thu Dec 2 21:31:39 2021
s27	0.3348279572244097	0.35004779367156186	17	0.36933676352342776	0.2518846315579883	lasso_yeo17_alpha_-2	LASSO	glm7	sc1	sess	True	True	yeo17	cerebellum_suit	True	4	crossed	False	-2	Thu Dec 2 21:31:50 2021
s28	0.3299920767680815	0.29648128191097817	17	0.3522410724383254	0.20049518375117437	lasso_yeo17_alpha_-2	LASSO	glm7	sc1	sess	True	True	yeo17	cerebellum_suit	True	4	crossed	False	-2	Thu Dec 2 21:32:01 2021
s29	0.46235149955133287	0.3037345491045572	17	0.5261476144062017	0.1359250757241569	lasso_yeo17_alpha_-2	LASSO	glm7	sc1	sess	True	True	yeo17	cerebellum_suit	True	4	crossed	False	-2	Thu Dec 2 21:32:12 2021
s30	0.39268349753797277	0.3545569866285314	17	0.4449709378538747	0.136162008123756	lasso_yeo17_alpha_-2	LASSO	glm7	sc1	sess	True	True	yeo17	cerebellum_suit	True	4	crossed	False	-2	Thu Dec 2 21:32:24 2021
s31	0.3278282316177641	0.24381051632829254	17	0.35638094729430064	0.10274249559278359	lasso_yeo17_alpha_-2	LASSO	glm7	sc1	sess	True	True	yeo17	cerebellum_suit	True	4	crossed	False	-2	Thu Dec 2 21:32:35 2021
s02	0.3456010831174615	0.22326251997703384	17	0.37594687045380637	0.20366553561141354	lasso_yeo17_alpha_-1	LASSO	glm7	sc1	sess	True	True	yeo17	cerebellum_suit	True	4	crossed	False	-1	Thu Dec 2 21:32:45 2021
s03	0.39060728430316205	0.33016346707746974	17	0.43741492717257546	0.2994973328210623	lasso_yeo17_alpha_-1	LASSO	glm7	sc1	sess	True	True	yeo17	cerebellum_suit	True	4	crossed	False	-1	Thu Dec 2 21:32:56 2021
s04	0.3343097116533611	0.1602796566206215	17	0.37302440718458046	0.05957695737214378	lasso_yeo17_alpha_-1	LASSO	glm7	sc1	sess	True	True	yeo17	cerebellum_suit	True	4	crossed	False	-1	Thu Dec 2 21:33:08 2021
s06	0.3242417386535483	0.2992665003258185	17	0.35466488370393123	0.27099064791787497	lasso_yeo17_alpha_-1	LASSO	glm7	sc1	sess	True	True	yeo17	cerebellum_suit	True	4	crossed	False	-1	Thu Dec 2 21:33:18 2021
s08	0.4214057412475675	0.08629598072369052	17	0.440808153455768	0.08412704554089435	lasso_yeo17_alpha_-1	LASSO	glm7	sc1	sess	True	True	yeo17	cerebellum_suit	True	4	crossed	False	-1	Thu Dec 2 21:33:29 2021
s09	0.33397794127693553	0.27749344962978656	17	0.3619931440168835	0.264674640331302	lasso_yeo17_alpha_-1	LASSO	glm7	sc1	sess	True	True	yeo17	cerebellum_suit	True	4	crossed	False	-1	Thu Dec 2 21:33:40 2021
s10	0.37349468438454525	0.30445800014042135	17	0.4006042447465461	0.2866667328743333	lasso_yeo17_alpha_-1	LASSO	glm7	sc1	sess	True	True	yeo17	cerebellum_suit	True	4	crossed	False	-1	Thu Dec 2 21:33:51 2021
s12	0.3677672701136514	0.20898248769078673	17	0.397192840645174	0.19477047926929214	lasso_yeo17_alpha_-1	LASSO	glm7	sc1	sess	True	True	yeo17	cerebellum_suit	True	4	crossed	False	-1	Thu Dec 2 21:34:02 2021
s14	0.34993522547741845	0.14783364141347333	17	0.37212922274440596	0.13352137139388906	lasso_yeo17_alpha_-1	LASSO	glm7	sc1	sess	True	True	yeo17	cerebellum_suit	True	4	crossed	False	-1	Thu Dec 2 21:34:13 2021
s15	0.37170105623175437	0.10719838307550754	17	0.3974178326078017	0.1021383619483395	lasso_yeo17_alpha_-1	LASSO	glm7	sc1	sess	True	True	yeo17	cerebellum_suit	True	4	crossed	False	-1	Thu Dec 2 21:34:24 2021
s17	0.3868237364554801	0.3238561183889573	17	0.42928062342605333	0.2716451594681138	lasso_yeo17_alpha_-1	LASSO	glm7	sc1	sess	True	True	yeo17	cerebellum_suit	True	4	crossed	False	-1	Thu Dec 2 21:34:35 2021
s18	0.29998570444967215	0.0994809169772042	17	0.31854718941159715	0.0869577569040239	lasso_yeo17_alpha_-1	LASSO	glm7	sc1	sess	True	True	yeo17	cerebellum_suit	True	4	crossed	False	-1	Thu Dec 2 21:34:46 2021
s19	0.2862415306041809	0.11151471547573796	17	0.30954040741444566	0.09872025515024982	lasso_yeo17_alpha_-1	LASSO	glm7	sc1	sess	True	True	yeo17	cerebellum_suit	True	4	crossed	False	-1	Thu Dec 2 21:34:57 2021
s20	0.3424406408263015	0.20084757719086693	17	0.3692936393945439	0.18416824335150628	lasso_yeo17_alpha_-1	LASSO	glm7	sc1	sess	True	True	yeo17	cerebellum_suit	True	4	crossed	False	-1	Thu Dec 2 21:35:07 2021
s21	0.3809405118016866	0.062312836998250944	17	0.4058166865716145	0.04116287623461764	lasso_yeo17_alpha_-1	LASSO	glm7	sc1	sess	True	True	yeo17	cerebellum_suit	True	4	crossed	False	-1	Thu Dec 2 21:35:18 2021
s22	0.3879205029088588	0.4320664059653289	17	0.42877118132393405	0.40678220852652297	lasso_yeo17_alpha_-1	LASSO	glm7	sc1	sess	True	True	yeo17	cerebellum_suit	True	4	crossed	False	-1	Thu Dec 2 21:35:29 2021
s24	0.37097777950225763	0.1866968510971481	17	0.40006027240588726	0.16425675654016145	lasso_yeo17_alpha_-1	LASSO	glm7	sc1	sess	True	True	yeo17	cerebellum_suit	True	4	crossed	False	-1	Thu Dec 2 21:35:40 2021
s25	0.36634704825952735	0.17326628285438544	17	0.3934636173661352	0.1626142681341129	lasso_yeo17_alpha_-1	LASSO	glm7	sc1	sess	True	True	yeo17	cerebellum_suit	True	4	crossed	False	-1	Thu Dec 2 21:35:50 2021
s26	0.3553802940209746	0.15175202373398228	17	0.37837786182938604	0.1426297863519928	lasso_yeo17_alpha_-1	LASSO	glm7	sc1	sess	True	True	yeo17	cerebellum_suit	True	4	crossed	False	-1	Thu Dec 2 21:36:01 2021
s27	0.3449388614105375	0.18995608172091097	17	0.375994333462	0.17626573138109225	lasso_yeo17_alpha_-1	LASSO	glm7	sc1	sess	True	True	yeo17	cerebellum_suit	True	4	crossed	False	-1	Thu Dec 2 21:36:12 2021
s28	0.3369547665540115	0.10592446984789872	17	0.3561492320278854	0.0878330624984287	lasso_yeo17_alpha_-1	LASSO	glm7	sc1	sess	True	True	yeo17	cerebellum_suit	True	4	crossed	False	-1	Thu Dec 2 21:36:23 2021
s29	0.47184312421864155	0.15868792060452228	17	0.5242682207694968	0.14307627266509265	lasso_yeo17_alpha_-1	LASSO	glm7	sc1	sess	True	True	yeo17	cerebellum_suit	True	4	crossed	False	-1	Thu Dec 2 21:36:34 2021
s30	0.40614735466499213	0.13147038024202906	17	0.4462728389012332	0.08847595218887405	lasso_yeo17_alpha_-1	LASSO	glm7	sc1	sess	True	True	yeo17	cerebellum_suit	True	4	crossed	False	-1	Thu Dec 2 21:36:45 2021
s31	0.331831452807194	0.09310166680442303	17	0.35606125930061827	0.06874180458282468	lasso_yeo17_alpha_-1	LASSO	glm7	sc1	sess	True	True	yeo17	cerebellum_suit	True	4	crossed	False	-1	Thu Dec 2 21:36:56 2021
s02	0.3022305116722819	0.5325649374298205	7	0.3793361025327708	0.2927873386250126	lasso_yeo7_alpha_-5	LASSO	glm7	sc1	sess	True	True	yeo7	cerebellum_suit	True	4	crossed	False	-5	Thu Dec 2 18:44:01 2021
s03	0.3368338771545853	0.5853142706008108	7	0.42929397091348986	0.40275064627854734	lasso_yeo7_alpha_-5	LASSO	glm7	sc1	sess	True	True	yeo7	cerebellum_suit	True	4	crossed	False	-5	Thu Dec 2 18:44:13 2021
s04	0.30060132733511863	0.4652174695987046	7	0.3842887288853526	0.1928961469464099	lasso_yeo7_alpha_-5	LASSO	glm7	sc1	sess	True	True	yeo7	cerebellum_suit	True	4	crossed	False	-5	Thu Dec 2 18:44:26 2021
s06	0.27213343239268584	0.6070432269447981	7	0.349210967278014	0.3944367348373745	lasso_yeo7_alpha_-5	LASSO	glm7	sc1	sess	True	True	yeo7	cerebellum_suit	True	4	crossed	False	-5	Thu Dec 2 18:44:38 2021
s08	0.3756654611687534	0.4683168480465565	7	0.4554478571369249	0.19306309631624294	lasso_yeo7_alpha_-5	LASSO	glm7	sc1	sess	True	True	yeo7	cerebellum_suit	True	4	crossed	False	-5	Thu Dec 2 18:44:52 2021
s09	0.2900661163771712	0.5603917968484251	7	0.35391828684251914	0.3696126298142506	lasso_yeo7_alpha_-5	LASSO	glm7	sc1	sess	True	True	yeo7	cerebellum_suit	True	4	crossed	False	-5	Thu Dec 2 18:45:07 2021
s10	0.3247479293344247	0.5654282900847373	7	0.4062708578370729	0.35355422925726576	lasso_yeo7_alpha_-5	LASSO	glm7	sc1	sess	True	True	yeo7	cerebellum_suit	True	4	crossed	False	-5	Thu Dec 2 18:45:19 2021
s12	0.3263411722199309	0.5036968369440877	7	0.40241227332160906	0.2670054382359076	lasso_yeo7_alpha_-5	LASSO	glm7	sc1	sess	True	True	yeo7	cerebellum_suit	True	4	crossed	False	-5	Thu Dec 2 18:45:31 2021
s14	0.3059910528773214	0.5081559335547037	7	0.36579980648986204	0.29821784994313305	lasso_yeo7_alpha_-5	LASSO	glm7	sc1	sess	True	True	yeo7	cerebellum_suit	True	4	crossed	False	-5	Thu Dec 2 18:45:45 2021
s15	0.32935038800518296	0.4803545093082906	7	0.4141729972241893	0.18270895175245105	lasso_yeo7_alpha_-5	LASSO	glm7	sc1	sess	True	True	yeo7	cerebellum_suit	True	4	crossed	False	-5	Thu Dec 2 18:45:57 2021
s17	0.3252478799283591	0.5998283249632107	7	0.4162303817436467	0.417670218779272	lasso_yeo7_alpha_-5	LASSO	glm7	sc1	sess	True	True	yeo7	cerebellum_suit	True	4	crossed	False	-5	Thu Dec 2 18:46:09 2021
s18	0.27191849729622525	0.44062171281784707	7	0.3311199444518411	0.1403806918881719	lasso_yeo7_alpha_-5	LASSO	glm7	sc1	sess	True	True	yeo7	cerebellum_suit	True	4	crossed	False	-5	Thu Dec 2 18:46:20 2021
s19	0.2521042910403392	0.5019613933665651	7	0.3008274715627022	0.31572201797513544	lasso_yeo7_alpha_-5	LASSO	glm7	sc1	sess	True	True	yeo7	cerebellum_suit	True	4	crossed	False	-5	Thu Dec 2 18:46:32 2021
s20	0.2940123696507644	0.53640641358677	7	0.3605452441405699	0.34204611480549363	lasso_yeo7_alpha_-5	LASSO	glm7	sc1	sess	True	True	yeo7	cerebellum_suit	True	4	crossed	False	-5	Thu Dec 2 18:46:44 2021
s21	0.3476215598465611	0.4159858725602502	7	0.4446103427637296	0.02283689118762804	lasso_yeo7_alpha_-5	LASSO	glm7	sc1	sess	True	True	yeo7	cerebellum_suit	True	4	crossed	False	-5	Thu Dec 2 18:46:56 2021
s22	0.32954112380056005	0.6406869901940415	7	0.4341862808122631	0.4530986767462488	lasso_yeo7_alpha_-5	LASSO	glm7	sc1	sess	True	True	yeo7	cerebellum_suit	True	4	crossed	False	-5	Thu Dec 2 18:47:08 2021
s24	0.3332776990451273	0.4726347845282135	7	0.4134259534279161	0.2127750574803622	lasso_yeo7_alpha_-5	LASSO	glm7	sc1	sess	True	True	yeo7	cerebellum_suit	True	4	crossed	False	-5	Thu Dec 2 18:47:20 2021
s25	0.3272309351080473	0.4778408037119042	7	0.4150759864111387	0.18057835277882228	lasso_yeo7_alpha_-5	LASSO	glm7	sc1	sess	True	True	yeo7	cerebellum_suit	True	4	crossed	False	-5	Thu Dec 2 18:47:32 2021
s26	0.3148405010230447	0.4895084342655652	7	0.3856564615105955	0.2247717241461925	lasso_yeo7_alpha_-5	LASSO	glm7	sc1	sess	True	True	yeo7	cerebellum_suit	True	4	crossed	False	-5	Thu Dec 2 18:47:44 2021
s27	0.30654870489666586	0.4905105016427606	7	0.3924974856589301	0.2372177942172737	lasso_yeo7_alpha_-5	LASSO	glm7	sc1	sess	True	True	yeo7	cerebellum_suit	True	4	crossed	False	-5	Thu Dec 2 18:47:56 2021
s28	0.3056772741702451	0.4423575825292651	7	0.3676845957716168	0.21004096311360695	lasso_yeo7_alpha_-5	LASSO	glm7	sc1	sess	True	True	yeo7	cerebellum_suit	True	4	crossed	False	-5	Thu Dec 2 18:48:08 2021
s29	0.4349932817078073	0.41695101652640026	7	0.5652403340988611	0.09241341757235276	lasso_yeo7_alpha_-5	LASSO	glm7	sc1	sess	True	True	yeo7	cerebellum_suit	True	4	crossed	False	-5	Thu Dec 2 18:48:21 2021
s30	0.3601459699951797	0.4759982384081982	7	0.472981190929597	0.14069526134848506	lasso_yeo7_alpha_-5	LASSO	glm7	sc1	sess	True	True	yeo7	cerebellum_suit	True	4	crossed	False	-5	Thu Dec 2 18:48:33 2021
s31	0.3030890196469983	0.41994459235653336	7	0.3852000964315655	0.08803551339112016	lasso_yeo7_alpha_-5	LASSO	glm7	sc1	sess	True	True	yeo7	cerebellum_suit	True	4	crossed	False	-5	Thu Dec 2 18:48:45 2021
s02	0.3074121168411369	0.5151759170438731	7	0.370413973989248	0.3095522700464284	lasso_yeo7_alpha_-4	LASSO	glm7	sc1	sess	True	True	yeo7	cerebellum_suit	True	4	crossed	False	-4	Thu Dec 2 18:48:52 2021
s03	0.3449870497211955	0.5655294705822341	7	0.4263534608561053	0.3982065934152053	lasso_yeo7_alpha_-4	LASSO	glm7	sc1	sess	True	True	yeo7	cerebellum_suit	True	4	crossed	False	-4	Thu Dec 2 18:49:03 2021
s04	0.30794195637795657	0.4316144332906441	7	0.37558184511916337	0.19703307723951785	lasso_yeo7_alpha_-4	LASSO	glm7	sc1	sess	True	True	yeo7	cerebellum_suit	True	4	crossed	False	-4	Thu Dec 2 18:49:15 2021
s06	0.2786347509222124	0.5873241389503348	7	0.3415596626389651	0.403888435314288	lasso_yeo7_alpha_-4	LASSO	glm7	sc1	sess	True	True	yeo7	cerebellum_suit	True	4	crossed	False	-4	Thu Dec 2 18:49:26 2021
s08	0.38697297572812256	0.4214294121894992	7	0.44913067996229694	0.18586871697467267	lasso_yeo7_alpha_-4	LASSO	glm7	sc1	sess	True	True	yeo7	cerebellum_suit	True	4	crossed	False	-4	Thu Dec 2 18:49:38 2021
s09	0.29826858680475105	0.5300242239614782	7	0.3479189592668908	0.3797785553018186	lasso_yeo7_alpha_-4	LASSO	glm7	sc1	sess	True	True	yeo7	cerebellum_suit	True	4	crossed	False	-4	Thu Dec 2 18:49:50 2021
s10	0.33348969457483185	0.5379395728797085	7	0.3982425096954745	0.3549235607831514	lasso_yeo7_alpha_-4	LASSO	glm7	sc1	sess	True	True	yeo7	cerebellum_suit	True	4	crossed	False	-4	Thu Dec 2 18:50:01 2021
s12	0.33311642614199866	0.4776817844257914	7	0.3953127729169992	0.2771963244131357	lasso_yeo7_alpha_-4	LASSO	glm7	sc1	sess	True	True	yeo7	cerebellum_suit	True	4	crossed	False	-4	Thu Dec 2 18:50:13 2021
s14	0.3132560700727522	0.4787384876380456	7	0.35926312461474424	0.30969054449809985	lasso_yeo7_alpha_-4	LASSO	glm7	sc1	sess	True	True	yeo7	cerebellum_suit	True	4	crossed	False	-4	Thu Dec 2 18:50:25 2021
s15	0.336370178909548	0.4548590415653089	7	0.4044790262088863	0.1810459107436665	lasso_yeo7_alpha_-4	LASSO	glm7	sc1	sess	True	True	yeo7	cerebellum_suit	True	4	crossed	False	-4	Thu Dec 2 18:50:36 2021
s17	0.3307665154301903	0.5868978203544001	7	0.4107346224139277	0.4213607412988351	lasso_yeo7_alpha_-4	LASSO	glm7	sc1	sess	True	True	yeo7	cerebellum_suit	True	4	crossed	False	-4	Thu Dec 2 18:50:47 2021
s18	0.2773526604898151	0.413707042507288	7	0.3225185844294834	0.15247130304798862	lasso_yeo7_alpha_-4	LASSO	glm7	sc1	sess	True	True	yeo7	cerebellum_suit	True	4	crossed	False	-4	Thu Dec 2 18:50:58 2021
s19	0.2580391951661612	0.4745690300066634	7	0.29693730292453285	0.3199791909487656	lasso_yeo7_alpha_-4	LASSO	glm7	sc1	sess	True	True	yeo7	cerebellum_suit	True	4	crossed	False	-4	Thu Dec 2 18:51:09 2021
s20	0.3000822603180172	0.515095964488257	7	0.3516024273257472	0.363791168677878	lasso_yeo7_alpha_-4	LASSO	glm7	sc1	sess	True	True	yeo7	cerebellum_suit	True	4	crossed	False	-4	Thu Dec 2 18:51:21 2021
s21	0.3550167118161453	0.3869311926231346	7	0.4311650018713568	0.014796826397192972	lasso_yeo7_alpha_-4	LASSO	glm7	sc1	sess	True	True	yeo7	cerebellum_suit	True	4	crossed	False	-4	Thu Dec 2 18:51:32 2021
s22	0.3352524689975863	0.6291086213285495	7	0.424060160956677	0.4652112253238022	lasso_yeo7_alpha_-4	LASSO	glm7	sc1	sess	True	True	yeo7	cerebellum_suit	True	4	crossed	False	-4	Thu Dec 2 18:51:44 2021
s24	0.3398578035308751	0.4452038586901249	7	0.4009957182529722	0.24257647727928205	lasso_yeo7_alpha_-4	LASSO	glm7	sc1	sess	True	True	yeo7	cerebellum_suit	True	4	crossed	False	-4	Thu Dec 2 18:51:55 2021
s25	0.33343102009881603	0.4549614458940153	7	0.4037095208257201	0.18694982662506926	lasso_yeo7_alpha_-4	LASSO	glm7	sc1	sess	True	True	yeo7	cerebellum_suit	True	4	crossed	False	-4	Thu Dec 2 18:52:06 2021
s26	0.3209703360279004	0.4677599498842919	7	0.37654754356210096	0.23932036972049697	lasso_yeo7_alpha_-4	LASSO	glm7	sc1	sess	True	True	yeo7	cerebellum_suit	True	4	crossed	False	-4	Thu Dec 2 18:52:18 2021
s27	0.3137885126939773	0.4588788394622652	7	0.3798695659515628	0.26060241946154045	lasso_yeo7_alpha_-4	LASSO	glm7	sc1	sess	True	True	yeo7	cerebellum_suit	True	4	crossed	False	-4	Thu Dec 2 18:52:30 2021
s28	0.31076532121832234	0.4189294769286762	7	0.36028711959881843	0.219548353027885	lasso_yeo7_alpha_-4	LASSO	glm7	sc1	sess	True	True	yeo7	cerebellum_suit	True	4	crossed	False	-4	Thu Dec 2 18:52:41 2021
s29	0.4426190864386015	0.3910555423424625	7	0.5516017029248869	0.09839975916068013	lasso_yeo7_alpha_-4	LASSO	glm7	sc1	sess	True	True	yeo7	cerebellum_suit	True	4	crossed	False	-4	Thu Dec 2 18:52:54 2021
s30	0.3650048828912319	0.461414789703272	7	0.4614468149187494	0.1499624800296234	lasso_yeo7_alpha_-4	LASSO	glm7	sc1	sess	True	True	yeo7	cerebellum_suit	True	4	crossed	False	-4	Thu Dec 2 18:53:06 2021
s31	0.3082278450246563	0.3986679708062606	7	0.3749155587425061	0.08903307872534427	lasso_yeo7_alpha_-4	LASSO	glm7	sc1	sess	True	True	yeo7	cerebellum_suit	True	4	crossed	False	-4	Thu Dec 2 18:53:17 2021
s02	0.3188355833306267	0.4702184338547335	7	0.36422040672447203	0.3162647118843964	lasso_yeo7_alpha_-3	LASSO	glm7	sc1	sess	True	True	yeo7	cerebellum_suit	True	4	crossed	False	-3	Thu Dec 2 18:53:28 2021
s03	0.3620364215763494	0.5091604076990667	7	0.4268044704816485	0.3793260823008345	lasso_yeo7_alpha_-3	LASSO	glm7	sc1	sess	True	True	yeo7	cerebellum_suit	True	4	crossed	False	-3	Thu Dec 2 18:53:39 2021
s04	0.3184167466267467	0.3698707626869796	7	0.3692009771785443	0.1917004297468052	lasso_yeo7_alpha_-3	LASSO	glm7	sc1	sess	True	True	yeo7	cerebellum_suit	True	4	crossed	False	-3	Thu Dec 2 18:53:51 2021
s06	0.2925250934930245	0.5400695962609895	7	0.33742166593859635	0.4001041895905367	lasso_yeo7_alpha_-3	LASSO	glm7	sc1	sess	True	True	yeo7	cerebellum_suit	True	4	crossed	False	-3	Thu Dec 2 18:54:01 2021
s08	0.4030500314372165	0.3407841725252878	7	0.4426799705914209	0.16412168811513572	lasso_yeo7_alpha_-3	LASSO	glm7	sc1	sess	True	True	yeo7	cerebellum_suit	True	4	crossed	False	-3	Thu Dec 2 18:54:12 2021
s09	0.3102419274640334	0.4741563453954996	7	0.3471062832429101	0.372510667118152	lasso_yeo7_alpha_-3	LASSO	glm7	sc1	sess	True	True	yeo7	cerebellum_suit	True	4	crossed	False	-3	Thu Dec 2 18:54:24 2021
s10	0.34882812538055835	0.4768993073328834	7	0.3924081830947673	0.34851232884497985	lasso_yeo7_alpha_-3	LASSO	glm7	sc1	sess	True	True	yeo7	cerebellum_suit	True	4	crossed	False	-3	Thu Dec 2 18:54:35 2021
s12	0.34494229298717083	0.42558019396140895	7	0.3902324900850776	0.2779833343393339	lasso_yeo7_alpha_-3	LASSO	glm7	sc1	sess	True	True	yeo7	cerebellum_suit	True	4	crossed	False	-3	Thu Dec 2 18:54:46 2021
s14	0.3258614976686409	0.41928780347551386	7	0.3584235518552151	0.295944692675468	lasso_yeo7_alpha_-3	LASSO	glm7	sc1	sess	True	True	yeo7	cerebellum_suit	True	4	crossed	False	-3	Thu Dec 2 18:54:57 2021
s15	0.3511808343009541	0.3859979132860626	7	0.3983536057081907	0.15272887508732344	lasso_yeo7_alpha_-3	LASSO	glm7	sc1	sess	True	True	yeo7	cerebellum_suit	True	4	crossed	False	-3	Thu Dec 2 18:55:11 2021
s17	0.3447755544692095	0.5499721987852816	7	0.4077003758943024	0.4136878103837888	lasso_yeo7_alpha_-3	LASSO	glm7	sc1	sess	True	True	yeo7	cerebellum_suit	True	4	crossed	False	-3	Thu Dec 2 18:55:22 2021
s18	0.2884535359123514	0.33336550184472696	7	0.3166373598829798	0.15364878052548214	lasso_yeo7_alpha_-3	LASSO	glm7	sc1	sess	True	True	yeo7	cerebellum_suit	True	4	crossed	False	-3	Thu Dec 2 18:55:33 2021
s19	0.2696127631909885	0.4106696293898408	7	0.2980100552369547	0.292335057609462	lasso_yeo7_alpha_-3	LASSO	glm7	sc1	sess	True	True	yeo7	cerebellum_suit	True	4	crossed	False	-3	Thu Dec 2 18:55:44 2021
s20	0.3117068451496379	0.4668444969341989	7	0.34894678275013524	0.3641192875820761	lasso_yeo7_alpha_-3	LASSO	glm7	sc1	sess	True	True	yeo7	cerebellum_suit	True	4	crossed	False	-3	Thu Dec 2 18:55:54 2021
s21	0.36942956794297865	0.29315955824199563	7	0.4159393164438089	0.005182386318766619	lasso_yeo7_alpha_-3	LASSO	glm7	sc1	sess	True	True	yeo7	cerebellum_suit	True	4	crossed	False	-3	Thu Dec 2 18:56:05 2021
s22	0.3494690505142575	0.5949432565905641	7	0.4147018827070729	0.4744596583977979	lasso_yeo7_alpha_-3	LASSO	glm7	sc1	sess	True	True	yeo7	cerebellum_suit	True	4	crossed	False	-3	Thu Dec 2 18:56:16 2021
s24	0.3495676492926297	0.3963839119224845	7	0.3927457394669369	0.2639297867778592	lasso_yeo7_alpha_-3	LASSO	glm7	sc1	sess	True	True	yeo7	cerebellum_suit	True	4	crossed	False	-3	Thu Dec 2 18:56:27 2021
s25	0.3461715241664712	0.3945728258479232	7	0.39453739973348656	0.18611255999819915	lasso_yeo7_alpha_-3	LASSO	glm7	sc1	sess	True	True	yeo7	cerebellum_suit	True	4	crossed	False	-3	Thu Dec 2 18:56:38 2021
s26	0.3353909155024697	0.3987091083860971	7	0.37087282657151055	0.2412296115662243	lasso_yeo7_alpha_-3	LASSO	glm7	sc1	sess	True	True	yeo7	cerebellum_suit	True	4	crossed	False	-3	Thu Dec 2 18:56:49 2021
s27	0.32370971596004144	0.4086721989068576	7	0.3697035181615851	0.2758097660007116	lasso_yeo7_alpha_-3	LASSO	glm7	sc1	sess	True	True	yeo7	cerebellum_suit	True	4	crossed	False	-3	Thu Dec 2 18:57:00 2021
s28	0.3207457943502756	0.3619816601311365	7	0.35411319478254666	0.21650063014834767	lasso_yeo7_alpha_-3	LASSO	glm7	sc1	sess	True	True	yeo7	cerebellum_suit	True	4	crossed	False	-3	Thu Dec 2 18:57:11 2021
s29	0.4557688126403065	0.32604620562173514	7	0.5348939241093382	0.11551129059799872	lasso_yeo7_alpha_-3	LASSO	glm7	sc1	sess	True	True	yeo7	cerebellum_suit	True	4	crossed	False	-3	Thu Dec 2 18:57:22 2021
s30	0.37757009333717584	0.4175246269297493	7	0.4486211079487441	0.1567466682044945	lasso_yeo7_alpha_-3	LASSO	glm7	sc1	sess	True	True	yeo7	cerebellum_suit	True	4	crossed	False	-3	Thu Dec 2 18:57:33 2021
s31	0.3202366655839056	0.3217248430159793	7	0.36322718710781465	0.0841312510412838	lasso_yeo7_alpha_-3	LASSO	glm7	sc1	sess	True	True	yeo7	cerebellum_suit	True	4	crossed	False	-3	Thu Dec 2 18:57:44 2021
s02	0.33581530283794336	0.3650235624060606	7	0.3684396141693581	0.2737516654633975	lasso_yeo7_alpha_-2	LASSO	glm7	sc1	sess	True	True	yeo7	cerebellum_suit	True	4	crossed	False	-2	Thu Dec 2 18:57:54 2021
s03	0.3817366715246715	0.4062399930622039	7	0.4314264155665095	0.3396746509227261	lasso_yeo7_alpha_-2	LASSO	glm7	sc1	sess	True	True	yeo7	cerebellum_suit	True	4	crossed	False	-2	Thu Dec 2 18:58:05 2021
s04	0.3293529673848504	0.27424643052395115	7	0.3694000321205532	0.1556860559380161	lasso_yeo7_alpha_-2	LASSO	glm7	sc1	sess	True	True	yeo7	cerebellum_suit	True	4	crossed	False	-2	Thu Dec 2 18:58:16 2021
s06	0.3134786007880258	0.4261691362041117	7	0.3446659612054179	0.3475404661856755	lasso_yeo7_alpha_-2	LASSO	glm7	sc1	sess	True	True	yeo7	cerebellum_suit	True	4	crossed	False	-2	Thu Dec 2 18:58:27 2021
s08	0.4179135532719407	0.19082748318890014	7	0.43906878121275705	0.13764189562442333	lasso_yeo7_alpha_-2	LASSO	glm7	sc1	sess	True	True	yeo7	cerebellum_suit	True	4	crossed	False	-2	Thu Dec 2 18:58:37 2021
s09	0.32491096679040904	0.3860023177406281	7	0.3531902686418874	0.3332776393543281	lasso_yeo7_alpha_-2	LASSO	glm7	sc1	sess	True	True	yeo7	cerebellum_suit	True	4	crossed	False	-2	Thu Dec 2 18:58:48 2021
s10	0.3662519207371631	0.37375551435803456	7	0.3951405284370268	0.32081451562142865	lasso_yeo7_alpha_-2	LASSO	glm7	sc1	sess	True	True	yeo7	cerebellum_suit	True	4	crossed	False	-2	Thu Dec 2 18:58:59 2021
s12	0.3604296832637576	0.3162891902550321	7	0.3922137390502307	0.2440421414889427	lasso_yeo7_alpha_-2	LASSO	glm7	sc1	sess	True	True	yeo7	cerebellum_suit	True	4	crossed	False	-2	Thu Dec 2 18:59:09 2021
s14	0.3427843127348026	0.29382934737274435	7	0.36609277167583537	0.22443392170242835	lasso_yeo7_alpha_-2	LASSO	glm7	sc1	sess	True	True	yeo7	cerebellum_suit	True	4	crossed	False	-2	Thu Dec 2 18:59:20 2021
s15	0.3675021008511827	0.2267684164568116	7	0.3968352297364167	0.11132124826539253	lasso_yeo7_alpha_-2	LASSO	glm7	sc1	sess	True	True	yeo7	cerebellum_suit	True	4	crossed	False	-2	Thu Dec 2 18:59:31 2021
s17	0.3702077516327987	0.4512830198902874	7	0.4154833638207385	0.3652497748862337	lasso_yeo7_alpha_-2	LASSO	glm7	sc1	sess	True	True	yeo7	cerebellum_suit	True	4	crossed	False	-2	Thu Dec 2 18:59:42 2021
s18	0.2979192693878776	0.1900469494339324	7	0.3170068813886328	0.12312460886320074	lasso_yeo7_alpha_-2	LASSO	glm7	sc1	sess	True	True	yeo7	cerebellum_suit	True	4	crossed	False	-2	Thu Dec 2 18:59:53 2021
s19	0.282808056566253	0.2564610793822218	7	0.305483827137664	0.19443088755446716	lasso_yeo7_alpha_-2	LASSO	glm7	sc1	sess	True	True	yeo7	cerebellum_suit	True	4	crossed	False	-2	Thu Dec 2 19:00:03 2021
s20	0.3309034884180666	0.36305631068126415	7	0.3577787977287718	0.3070394838642516	lasso_yeo7_alpha_-2	LASSO	glm7	sc1	sess	True	True	yeo7	cerebellum_suit	True	4	crossed	False	-2	Thu Dec 2 19:00:14 2021
s21	0.3791729311394632	0.14794250947185342	7	0.4074663898511544	0.008854571347227943	lasso_yeo7_alpha_-2	LASSO	glm7	sc1	sess	True	True	yeo7	cerebellum_suit	True	4	crossed	False	-2	Thu Dec 2 19:00:24 2021
s22	0.3735793930081111	0.5136820629564155	7	0.4182716603898395	0.4507648161697106	lasso_yeo7_alpha_-2	LASSO	glm7	sc1	sess	True	True	yeo7	cerebellum_suit	True	4	crossed	False	-2	Thu Dec 2 19:00:35 2021
s24	0.3624145612552058	0.3145157408229433	7	0.3942482311495403	0.2371133601697619	lasso_yeo7_alpha_-2	LASSO	glm7	sc1	sess	True	True	yeo7	cerebellum_suit	True	4	crossed	False	-2	Thu Dec 2 19:00:46 2021
s25	0.3612189665842413	0.2688583202349249	7	0.39142400315037695	0.18242223533748775	lasso_yeo7_alpha_-2	LASSO	glm7	sc1	sess	True	True	yeo7	cerebellum_suit	True	4	crossed	False	-2	Thu Dec 2 19:00:56 2021
s26	0.3506077354490899	0.258175076651763	7	0.3739666787883845	0.2021133519229918	lasso_yeo7_alpha_-2	LASSO	glm7	sc1	sess	True	True	yeo7	cerebellum_suit	True	4	crossed	False	-2	Thu Dec 2 19:01:07 2021
s27	0.3374612769224653	0.3171424115489106	7	0.3708910743212165	0.23430106650034116	lasso_yeo7_alpha_-2	LASSO	glm7	sc1	sess	True	True	yeo7	cerebellum_suit	True	4	crossed	False	-2	Thu Dec 2 19:01:18 2021
s28	0.33286204936870584	0.23863789947878555	7	0.3538667179864566	0.16687223371155938	lasso_yeo7_alpha_-2	LASSO	glm7	sc1	sess	True	True	yeo7	cerebellum_suit	True	4	crossed	False	-2	Thu Dec 2 19:01:29 2021
s29	0.4676700245102129	0.22719421004437226	7	0.5252874908592289	0.13451294776884273	lasso_yeo7_alpha_-2	LASSO	glm7	sc1	sess	True	True	yeo7	cerebellum_suit	True	4	crossed	False	-2	Thu Dec 2 19:01:40 2021
s30	0.3976544753885317	0.2942459802102113	7	0.4446227840981795	0.1288010572481363	lasso_yeo7_alpha_-2	LASSO	glm7	sc1	sess	True	True	yeo7	cerebellum_suit	True	4	crossed	False	-2	Thu Dec 2 19:01:50 2021
s31	0.3300838792533719	0.17321147834764894	7	0.35699640557964	0.07374375428416705	lasso_yeo7_alpha_-2	LASSO	glm7	sc1	sess	True	True	yeo7	cerebellum_suit	True	4	crossed	False	-2	Thu Dec 2 19:02:01 2021
s02	0.3460314841235321	0.20571457185078265	7	0.3767109967137098	0.19175347947420696	lasso_yeo7_alpha_-1	LASSO	glm7	sc1	sess	True	True	yeo7	cerebellum_suit	True	4	crossed	False	-1	Thu Dec 2 19:02:12 2021
s03	0.3916719937507441	0.3110683614690405	7	0.4384666260793246	0.2940099787198371	lasso_yeo7_alpha_-1	LASSO	glm7	sc1	sess	True	True	yeo7	cerebellum_suit	True	4	crossed	False	-1	Thu Dec 2 19:02:22 2021
s04	0.33470841601957274	0.11665987266072222	7	0.3727547464402808	0.03566167617738389	lasso_yeo7_alpha_-1	LASSO	glm7	sc1	sess	True	True	yeo7	cerebellum_suit	True	4	crossed	False	-1	Thu Dec 2 19:02:33 2021
s06	0.32517847205075945	0.2761423155748193	7	0.3567549201410293	0.2471977227513562	lasso_yeo7_alpha_-1	LASSO	glm7	sc1	sess	True	True	yeo7	cerebellum_suit	True	4	crossed	False	-1	Thu Dec 2 19:02:44 2021
s08	0.4216321614017641	0.06275407347600309	7	0.4412315174669618	0.06392481494617068	lasso_yeo7_alpha_-1	LASSO	glm7	sc1	sess	True	True	yeo7	cerebellum_suit	True	4	crossed	False	-1	Thu Dec 2 19:02:55 2021
s09	0.3347451067646709	0.2604198704257001	7	0.3637770928422649	0.2465445006051031	lasso_yeo7_alpha_-1	LASSO	glm7	sc1	sess	True	True	yeo7	cerebellum_suit	True	4	crossed	False	-1	Thu Dec 2 19:03:05 2021
s10	0.3741828476765005	0.2909577447111586	7	0.4019306506800759	0.2756452181238304	lasso_yeo7_alpha_-1	LASSO	glm7	sc1	sess	True	True	yeo7	cerebellum_suit	True	4	crossed	False	-1	Thu Dec 2 19:03:16 2021
s12	0.3681887128974489	0.19387846194196612	7	0.397854040805096	0.18482188986894466	lasso_yeo7_alpha_-1	LASSO	glm7	sc1	sess	True	True	yeo7	cerebellum_suit	True	4	crossed	False	-1	Thu Dec 2 19:03:26 2021
s14	0.350298324212818	0.12851137524161962	7	0.3728129317278331	0.11924275287290567	lasso_yeo7_alpha_-1	LASSO	glm7	sc1	sess	True	True	yeo7	cerebellum_suit	True	4	crossed	False	-1	Thu Dec 2 19:03:37 2021
s15	0.3718326352809389	0.09919253874537416	7	0.3976261638262568	0.09633638304209052	lasso_yeo7_alpha_-1	LASSO	glm7	sc1	sess	True	True	yeo7	cerebellum_suit	True	4	crossed	False	-1	Thu Dec 2 19:03:48 2021
s17	0.3881971135363935	0.2988456825119131	7	0.4305935057310785	0.2615869454022008	lasso_yeo7_alpha_-1	LASSO	glm7	sc1	sess	True	True	yeo7	cerebellum_suit	True	4	crossed	False	-1	Thu Dec 2 19:03:59 2021
s18	0.3000589841765289	0.09089475188735864	7	0.3186835905545093	0.08184316306009029	lasso_yeo7_alpha_-1	LASSO	glm7	sc1	sess	True	True	yeo7	cerebellum_suit	True	4	crossed	False	-1	Thu Dec 2 19:04:10 2021
s19	0.2863854126154282	0.0947564671420805	7	0.30984181461893184	0.08681183106703509	lasso_yeo7_alpha_-1	LASSO	glm7	sc1	sess	True	True	yeo7	cerebellum_suit	True	4	crossed	False	-1	Thu Dec 2 19:04:20 2021
s20	0.3429686525676142	0.17733032904095994	7	0.3701693641244099	0.16940453053929627	lasso_yeo7_alpha_-1	LASSO	glm7	sc1	sess	True	True	yeo7	cerebellum_suit	True	4	crossed	False	-1	Thu Dec 2 19:04:31 2021
s21	0.3810042520231689	0.05200637290318324	7	0.4058841571201599	0.035957659507628914	lasso_yeo7_alpha_-1	LASSO	glm7	sc1	sess	True	True	yeo7	cerebellum_suit	True	4	crossed	False	-1	Thu Dec 2 19:04:41 2021
s22	0.3893442943467175	0.4152137252288861	7	0.4312297054179155	0.39462571234215815	lasso_yeo7_alpha_-1	LASSO	glm7	sc1	sess	True	True	yeo7	cerebellum_suit	True	4	crossed	False	-1	Thu Dec 2 19:04:52 2021
s24	0.371418363482788	0.16984910449774898	7	0.40068010631628265	0.1535051928851147	lasso_yeo7_alpha_-1	LASSO	glm7	sc1	sess	True	True	yeo7	cerebellum_suit	True	4	crossed	False	-1	Thu Dec 2 19:05:03 2021
s25	0.36655615044338624	0.16412270843301222	7	0.3937190631104278	0.15741880563042995	lasso_yeo7_alpha_-1	LASSO	glm7	sc1	sess	True	True	yeo7	cerebellum_suit	True	4	crossed	False	-1	Thu Dec 2 19:05:15 2021
s26	0.3556608047075782	0.13625355732925382	7	0.37888129485855854	0.12999665523654574	lasso_yeo7_alpha_-1	LASSO	glm7	sc1	sess	True	True	yeo7	cerebellum_suit	True	4	crossed	False	-1	Thu Dec 2 19:05:26 2021
s27	0.3455953400694861	0.16569202755397272	7	0.3772335655998978	0.15363246974317354	lasso_yeo7_alpha_-1	LASSO	glm7	sc1	sess	True	True	yeo7	cerebellum_suit	True	4	crossed	False	-1	Thu Dec 2 19:05:37 2021
s28	0.3370896936287955	0.08931357654387065	7	0.3563656609817224	0.07827050203685695	lasso_yeo7_alpha_-1	LASSO	glm7	sc1	sess	True	True	yeo7	cerebellum_suit	True	4	crossed	False	-1	Thu Dec 2 19:05:48 2021
s29	0.4724409576199906	0.14113791019568514	7	0.5251479983774043	0.13097756639852115	lasso_yeo7_alpha_-1	LASSO	glm7	sc1	sess	True	True	yeo7	cerebellum_suit	True	4	crossed	False	-1	Thu Dec 2 19:05:58 2021
s30	0.4066024788973525	0.10631374748651316	7	0.4468041725389196	0.07477110226801442	lasso_yeo7_alpha_-1	LASSO	glm7	sc1	sess	True	True	yeo7	cerebellum_suit	True	4	crossed	False	-1	Thu Dec 2 19:06:09 2021
s31	0.33192017206013064	0.08090023965126404	7	0.3560418281159404	0.06886806218636486	lasso_yeo7_alpha_-1	LASSO	glm7	sc1	sess	True	True	yeo7	cerebellum_suit	True	4	crossed	False	-1	Thu Dec 2 19:06:20 2021
s02	0.2056153249048764	0.8380380903056922	80	0.3977792669268964	0.35236170169561115	lasso_tessels0042_alpha_-5	LASSO	glm7	sc1	sess	True	True	tessels0042	cerebellum_suit	True	4	crossed	False	-5	Thu Dec 2 17:32:42 2021
s03	0.21706034626296306	0.8730246725561365	80	0.45267242821148107	0.4507982430205234	lasso_tessels0042_alpha_-5	LASSO	glm7	sc1	sess	True	True	tessels0042	cerebellum_suit	True	4	crossed	False	-5	Thu Dec 2 17:35:26 2021
s04	0.18850703187463733	0.8634026571862226	80	0.4257785270981452	0.20351068999072572	lasso_tessels0042_alpha_-5	LASSO	glm7	sc1	sess	True	True	tessels0042	cerebellum_suit	True	4	crossed	False	-5	Thu Dec 2 17:38:24 2021
s06	0.18401410220247208	0.8607150565088324	80	0.375421787531904	0.4024310482150443	lasso_tessels0042_alpha_-5	LASSO	glm7	sc1	sess	True	True	tessels0042	cerebellum_suit	True	4	crossed	False	-5	Thu Dec 2 17:40:04 2021
s08	0.26260186660079843	0.806730899437608	80	0.5435534327448996	0.12556347704212886	lasso_tessels0042_alpha_-5	LASSO	glm7	sc1	sess	True	True	tessels0042	cerebellum_suit	True	4	crossed	False	-5	Thu Dec 2 17:44:00 2021
s09	0.21067985904261327	0.818237033782338	80	0.3756436558716292	0.3857476719901357	lasso_tessels0042_alpha_-5	LASSO	glm7	sc1	sess	True	True	tessels0042	cerebellum_suit	True	4	crossed	False	-5	Thu Dec 2 17:46:59 2021
s10	0.21901704013912585	0.8477132925811011	80	0.4241702076203365	0.3969082846788605	lasso_tessels0042_alpha_-5	LASSO	glm7	sc1	sess	True	True	tessels0042	cerebellum_suit	True	4	crossed	False	-5	Thu Dec 2 17:49:38 2021
s12	0.22068067587339152	0.8325632722088535	80	0.4496616468947817	0.2665478251768684	lasso_tessels0042_alpha_-5	LASSO	glm7	sc1	sess	True	True	tessels0042	cerebellum_suit	True	4	crossed	False	-5	Thu Dec 2 17:52:10 2021
s14	0.21766261140672385	0.8087453303116058	80	0.41646866326559984	0.23565640273598595	lasso_tessels0042_alpha_-5	LASSO	glm7	sc1	sess	True	True	tessels0042	cerebellum_suit	True	4	crossed	False	-5	Thu Dec 2 17:54:49 2021
s15	0.2070265721560038	0.8527779585752518	80	0.4454452220324293	0.2607704469164226	lasso_tessels0042_alpha_-5	LASSO	glm7	sc1	sess	True	True	tessels0042	cerebellum_suit	True	4	crossed	False	-5	Thu Dec 2 17:57:33 2021
s17	0.21996040092658486	0.8594575606693456	80	0.4637308394710178	0.3840374342558612	lasso_tessels0042_alpha_-5	LASSO	glm7	sc1	sess	True	True	tessels0042	cerebellum_suit	True	4	crossed	False	-5	Thu Dec 2 17:59:35 2021
s18	0.17961605847430942	0.8248656943225061	80	0.3615605644375047	0.22282383083751045	lasso_tessels0042_alpha_-5	LASSO	glm7	sc1	sess	True	True	tessels0042	cerebellum_suit	True	4	crossed	False	-5	Thu Dec 2 18:01:26 2021
s19	0.1856946686377743	0.795715383482745	80	0.3273400163090165	0.325504738444005	lasso_tessels0042_alpha_-5	LASSO	glm7	sc1	sess	True	True	tessels0042	cerebellum_suit	True	4	crossed	False	-5	Thu Dec 2 18:03:20 2021
s20	0.21658008912102	0.8065570120230116	80	0.3902095426211856	0.3476455767814596	lasso_tessels0042_alpha_-5	LASSO	glm7	sc1	sess	True	True	tessels0042	cerebellum_suit	True	4	crossed	False	-5	Thu Dec 2 18:06:10 2021
s21	0.21142782591152795	0.8564371064754199	80	0.5299785903707536	0.02030737986485933	lasso_tessels0042_alpha_-5	LASSO	glm7	sc1	sess	True	True	tessels0042	cerebellum_suit	True	4	crossed	False	-5	Thu Dec 2 18:09:06 2021
s22	0.2093215365926325	0.8881689063290937	80	0.4699338301822698	0.44799888443217584	lasso_tessels0042_alpha_-5	LASSO	glm7	sc1	sess	True	True	tessels0042	cerebellum_suit	True	4	crossed	False	-5	Thu Dec 2 18:11:07 2021
s24	0.22153437691071468	0.8297771570542106	80	0.4872442917879434	0.1865689698291788	lasso_tessels0042_alpha_-5	LASSO	glm7	sc1	sess	True	True	tessels0042	cerebellum_suit	True	4	crossed	False	-5	Thu Dec 2 18:13:54 2021
s25	0.20996183125014084	0.8479875573394037	80	0.4605931784884163	0.1883500969330964	lasso_tessels0042_alpha_-5	LASSO	glm7	sc1	sess	True	True	tessels0042	cerebellum_suit	True	4	crossed	False	-5	Thu Dec 2 18:16:41 2021
s26	0.21644133746859687	0.8210799808929926	80	0.415092667692326	0.26416593299560265	lasso_tessels0042_alpha_-5	LASSO	glm7	sc1	sess	True	True	tessels0042	cerebellum_suit	True	4	crossed	False	-5	Thu Dec 2 18:19:19 2021
s27	0.20382051718167304	0.8398036028649506	80	0.4246201707491526	0.2784127460325411	lasso_tessels0042_alpha_-5	LASSO	glm7	sc1	sess	True	True	tessels0042	cerebellum_suit	True	4	crossed	False	-5	Thu Dec 2 18:22:42 2021
s28	0.21124818990616	0.8062171689543045	80	0.4215345649875839	0.18516620363467168	lasso_tessels0042_alpha_-5	LASSO	glm7	sc1	sess	True	True	tessels0042	cerebellum_suit	True	4	crossed	False	-5	Thu Dec 2 18:24:56 2021
s29	0.2479205454517813	0.8804973439378595	80	0.6269556677522998	0.21831266319241124	lasso_tessels0042_alpha_-5	LASSO	glm7	sc1	sess	True	True	tessels0042	cerebellum_suit	True	4	crossed	False	-5	Thu Dec 2 18:28:45 2021
s30	0.21023810033057666	0.8783364897666197	80	0.5571572563344815	0.150240650558926	lasso_tessels0042_alpha_-5	LASSO	glm7	sc1	sess	True	True	tessels0042	cerebellum_suit	True	4	crossed	False	-5	Thu Dec 2 18:30:52 2021
s31	0.20036670567151066	0.8280860155221758	80	0.44788498225894857	0.1478768839516062	lasso_tessels0042_alpha_-5	LASSO	glm7	sc1	sess	True	True	tessels0042	cerebellum_suit	True	4	crossed	False	-5	Thu Dec 2 18:32:54 2021
s02	0.08230143173818408	0.9796197227285184	1848	0.40216785990302734	0.3683429618011603	lasso_tessels1002_alpha_-5	LASSO	glm7	sc1	sess	True	True	tessels1002	cerebellum_suit	True	4	crossed	False	-5	Thu Dec 2 02:55:40 2021
s03	0.09016457487992527	0.982272700940148	1848	0.4568752322516014	0.4477804624076661	lasso_tessels1002_alpha_-5	LASSO	glm7	sc1	sess	True	True	tessels1002	cerebellum_suit	True	4	crossed	False	-5	Thu Dec 2 03:36:31 2021
s04	0.0800849567406274	0.979122637591512	1848	0.4175154880786593	0.2521408415384145	lasso_tessels1002_alpha_-5	LASSO	glm7	sc1	sess	True	True	tessels1002	cerebellum_suit	True	4	crossed	False	-5	Thu Dec 2 04:10:21 2021
s06	0.08210582345673764	0.9770244907814332	1848	0.3806590264439087	0.4104378849162047	lasso_tessels1002_alpha_-5	LASSO	glm7	sc1	sess	True	True	tessels1002	cerebellum_suit	True	4	crossed	False	-5	Thu Dec 2 04:39:26 2021
s08	0.09883817192159564	0.9785495591757573	1848	0.5677539101719224	0.11705912484919699	lasso_tessels1002_alpha_-5	LASSO	glm7	sc1	sess	True	True	tessels1002	cerebellum_suit	True	4	crossed	False	-5	Thu Dec 2 05:28:34 2021
s09	0.08817100822961751	0.9750331127011008	1848	0.4030048498034081	0.3295772352817299	lasso_tessels1002_alpha_-5	LASSO	glm7	sc1	sess	True	True	tessels1002	cerebellum_suit	True	4	crossed	False	-5	Thu Dec 2 06:12:15 2021
s10	0.09070028886293137	0.9787593343644476	1848	0.4619776605957742	0.33962186187407184	lasso_tessels1002_alpha_-5	LASSO	glm7	sc1	sess	True	True	tessels1002	cerebellum_suit	True	4	crossed	False	-5	Thu Dec 2 06:51:28 2021
s12	0.08309454837795628	0.9816051948650654	1848	0.4662223108872003	0.24899662026040675	lasso_tessels1002_alpha_-5	LASSO	glm7	sc1	sess	True	True	tessels1002	cerebellum_suit	True	4	crossed	False	-5	Thu Dec 2 07:26:56 2021
s14	0.09747511221545396	0.9695122040990636	1848	0.4481396581194732	0.20244128953777488	lasso_tessels1002_alpha_-5	LASSO	glm7	sc1	sess	True	True	tessels1002	cerebellum_suit	True	4	crossed	False	-5	Thu Dec 2 08:10:18 2021
s15	0.08643768482970454	0.978944199378278	1848	0.4577341023630431	0.2497016058765228	lasso_tessels1002_alpha_-5	LASSO	glm7	sc1	sess	True	True	tessels1002	cerebellum_suit	True	4	crossed	False	-5	Thu Dec 2 08:46:19 2021
s17	0.08871583205006188	0.9816916809917584	1848	0.4677654326826578	0.3864060072805103	lasso_tessels1002_alpha_-5	LASSO	glm7	sc1	sess	True	True	tessels1002	cerebellum_suit	True	4	crossed	False	-5	Thu Dec 2 09:22:30 2021
s18	0.07577388979075904	0.9755412934360264	1848	0.36547480207203015	0.21404883413330789	lasso_tessels1002_alpha_-5	LASSO	glm7	sc1	sess	True	True	tessels1002	cerebellum_suit	True	4	crossed	False	-5	Thu Dec 2 09:50:23 2021
s19	0.08833528205064757	0.9641064285216846	1848	0.35130235652217073	0.2766747443487848	lasso_tessels1002_alpha_-5	LASSO	glm7	sc1	sess	True	True	tessels1002	cerebellum_suit	True	4	crossed	False	-5	Thu Dec 2 10:24:06 2021
s20	0.09173794222923744	0.9731210897135794	1848	0.4220908470333238	0.2838993575283838	lasso_tessels1002_alpha_-5	LASSO	glm7	sc1	sess	True	True	tessels1002	cerebellum_suit	True	4	crossed	False	-5	Thu Dec 2 11:07:56 2021
s21	0.08549083598753146	0.9806577786056908	1848	0.5229948545771705	0.029854819894239014	lasso_tessels1002_alpha_-5	LASSO	glm7	sc1	sess	True	True	tessels1002	cerebellum_suit	True	4	crossed	False	-5	Thu Dec 2 11:45:05 2021
s22	0.08173248103687958	0.9862161244487716	1848	0.4879410934607882	0.4073209573218855	lasso_tessels1002_alpha_-5	LASSO	glm7	sc1	sess	True	True	tessels1002	cerebellum_suit	True	4	crossed	False	-5	Thu Dec 2 12:20:09 2021
s24	0.08739246142998516	0.9793220991775984	1848	0.4866781899983597	0.19376776801864365	lasso_tessels1002_alpha_-5	LASSO	glm7	sc1	sess	True	True	tessels1002	cerebellum_suit	True	4	crossed	False	-5	Thu Dec 2 13:00:25 2021
s25	0.08319804018413537	0.9807943977485316	1848	0.4674402261293569	0.18422185876910047	lasso_tessels1002_alpha_-5	LASSO	glm7	sc1	sess	True	True	tessels1002	cerebellum_suit	True	4	crossed	False	-5	Thu Dec 2 13:37:02 2021
s26	0.09097254581209888	0.9751905148776372	1848	0.4397848145774266	0.2420351546165941	lasso_tessels1002_alpha_-5	LASSO	glm7	sc1	sess	True	True	tessels1002	cerebellum_suit	True	4	crossed	False	-5	Thu Dec 2 14:17:05 2021
s27	0.08646884035883952	0.9763692181772394	1848	0.4350843832102358	0.25524940040128824	lasso_tessels1002_alpha_-5	LASSO	glm7	sc1	sess	True	True	tessels1002	cerebellum_suit	True	4	crossed	False	-5	Thu Dec 2 14:57:51 2021
s28	0.08487958273285343	0.9759513369221592	1848	0.4279974222492017	0.1950765862184997	lasso_tessels1002_alpha_-5	LASSO	glm7	sc1	sess	True	True	tessels1002	cerebellum_suit	True	4	crossed	False	-5	Thu Dec 2 15:33:12 2021
s29	0.09452886745989399	0.985809593932504	1848	0.6279892072384596	0.19146759612891445	lasso_tessels1002_alpha_-5	LASSO	glm7	sc1	sess	True	True	tessels1002	cerebellum_suit	True	4	crossed	False	-5	Thu Dec 2 16:24:14 2021
s30	0.08061867416882082	0.9856412469124542	1848	0.5557590015613043	0.09291942002118764	lasso_tessels1002_alpha_-5	LASSO	glm7	sc1	sess	True	True	tessels1002	cerebellum_suit	True	4	crossed	False	-5	Thu Dec 2 16:59:20 2021
s31	0.0735406613401045	0.9830008313777918	1848	0.4393483734208387	0.1489142440775125	lasso_tessels1002_alpha_-5	LASSO	glm7	sc1	sess	True	True	tessels1002	cerebellum_suit	True	4	crossed	False	-5	Thu Dec 2 17:30:41 2021
s02	0.113942702685737	0.958196677158912	670	0.4017157150698671	0.3721570814341814	lasso_tessels0362_alpha_-5	LASSO	glm7	sc1	sess	True	True	tessels0362	cerebellum_suit	True	4	crossed	False	-5	Wed Dec 1 20:09:07 2021
s03	0.12200200460550675	0.9658884537332048	670	0.46160993302420505	0.4469237017226271	lasso_tessels0362_alpha_-5	LASSO	glm7	sc1	sess	True	True	tessels0362	cerebellum_suit	True	4	crossed	False	-5	Wed Dec 1 20:26:20 2021
s04	0.10560898295812854	0.9624076309553258	670	0.4254817433190604	0.24199273469257224	lasso_tessels0362_alpha_-5	LASSO	glm7	sc1	sess	True	True	tessels0362	cerebellum_suit	True	4	crossed	False	-5	Wed Dec 1 20:42:28 2021
s06	0.11107757797935433	0.9556025420423641	670	0.3854179889896481	0.40795210581202623	lasso_tessels0362_alpha_-5	LASSO	glm7	sc1	sess	True	True	tessels0362	cerebellum_suit	True	4	crossed	False	-5	Wed Dec 1 20:53:58 2021
s08	0.1382316175800538	0.9555371155213216	670	0.5725776888371118	0.1139300609154679	lasso_tessels0362_alpha_-5	LASSO	glm7	sc1	sess	True	True	tessels0362	cerebellum_suit	True	4	crossed	False	-5	Wed Dec 1 21:17:20 2021
s09	0.12261746012785772	0.948438409420004	670	0.3994974543279391	0.3473954325285876	lasso_tessels0362_alpha_-5	LASSO	glm7	sc1	sess	True	True	tessels0362	cerebellum_suit	True	4	crossed	False	-5	Wed Dec 1 21:37:08 2021
s10	0.12765508024236427	0.955236928872884	670	0.4635162821692338	0.3544938735161573	lasso_tessels0362_alpha_-5	LASSO	glm7	sc1	sess	True	True	tessels0362	cerebellum_suit	True	4	crossed	False	-5	Wed Dec 1 21:54:28 2021
s12	0.11650237602490955	0.96159113719485	670	0.4649647654816661	0.2663124486407749	lasso_tessels0362_alpha_-5	LASSO	glm7	sc1	sess	True	True	tessels0362	cerebellum_suit	True	4	crossed	False	-5	Wed Dec 1 22:10:01 2021
s14	0.12884205271139226	0.9434499605319018	670	0.4382089537468383	0.2270763459455776	lasso_tessels0362_alpha_-5	LASSO	glm7	sc1	sess	True	True	tessels0362	cerebellum_suit	True	4	crossed	False	-5	Wed Dec 1 22:28:08 2021
s15	0.11592889457027965	0.9604741178550219	670	0.4628981712698053	0.2458373370010508	lasso_tessels0362_alpha_-5	LASSO	glm7	sc1	sess	True	True	tessels0362	cerebellum_suit	True	4	crossed	False	-5	Wed Dec 1 22:44:03 2021
s17	0.12223478735148632	0.9633067639294624	670	0.4729199503918797	0.3910357609059129	lasso_tessels0362_alpha_-5	LASSO	glm7	sc1	sess	True	True	tessels0362	cerebellum_suit	True	4	crossed	False	-5	Wed Dec 1 22:58:23 2021
s18	0.10050678705409713	0.9544940289946042	670	0.3697561233497043	0.21684132247321225	lasso_tessels0362_alpha_-5	LASSO	glm7	sc1	sess	True	True	tessels0362	cerebellum_suit	True	4	crossed	False	-5	Wed Dec 1 23:09:45 2021
s19	0.1183714958178141	0.9299766873384182	670	0.34271709531744576	0.31174511143620565	lasso_tessels0362_alpha_-5	LASSO	glm7	sc1	sess	True	True	tessels0362	cerebellum_suit	True	4	crossed	False	-5	Wed Dec 1 23:23:35 2021
s20	0.12635229883268306	0.9453131243470076	670	0.41749940400120383	0.30380349901005194	lasso_tessels0362_alpha_-5	LASSO	glm7	sc1	sess	True	True	tessels0362	cerebellum_suit	True	4	crossed	False	-5	Wed Dec 1 23:42:59 2021
s21	0.11275559616154154	0.9648834370135776	670	0.5263986463984501	0.03845304843714928	lasso_tessels0362_alpha_-5	LASSO	glm7	sc1	sess	True	True	tessels0362	cerebellum_suit	True	4	crossed	False	-5	Wed Dec 1 23:58:38 2021
s22	0.11266219145316753	0.9724377515136452	670	0.4806969394283731	0.4293075234573401	lasso_tessels0362_alpha_-5	LASSO	glm7	sc1	sess	True	True	tessels0362	cerebellum_suit	True	4	crossed	False	-5	Thu Dec 2 00:11:58 2021
s24	0.11890709867957718	0.9598669632695084	670	0.4917727787677426	0.2060070094164101	lasso_tessels0362_alpha_-5	LASSO	glm7	sc1	sess	True	True	tessels0362	cerebellum_suit	True	4	crossed	False	-5	Thu Dec 2 00:29:28 2021
s25	0.11517505211816965	0.9609030140470194	670	0.4587605451900756	0.2068719411733104	lasso_tessels0362_alpha_-5	LASSO	glm7	sc1	sess	True	True	tessels0362	cerebellum_suit	True	4	crossed	False	-5	Thu Dec 2 00:45:10 2021
s26	0.12321511338297395	0.9513908335967648	670	0.4251441259468576	0.2860349535544118	lasso_tessels0362_alpha_-5	LASSO	glm7	sc1	sess	True	True	tessels0362	cerebellum_suit	True	4	crossed	False	-5	Thu Dec 2 01:02:06 2021
s27	0.11717478234298913	0.9544259398026572	670	0.4442977936434945	0.2459844587946413	lasso_tessels0362_alpha_-5	LASSO	glm7	sc1	sess	True	True	tessels0362	cerebellum_suit	True	4	crossed	False	-5	Thu Dec 2 01:20:44 2021
s28	0.11648198934749295	0.9519026310736759	670	0.4346818064494801	0.1924976614116317	lasso_tessels0362_alpha_-5	LASSO	glm7	sc1	sess	True	True	tessels0362	cerebellum_suit	True	4	crossed	False	-5	Thu Dec 2 01:35:31 2021
s29	0.12835835531235146	0.9727820891350912	670	0.6342023990646841	0.1887884241712512	lasso_tessels0362_alpha_-5	LASSO	glm7	sc1	sess	True	True	tessels0362	cerebellum_suit	True	4	crossed	False	-5	Thu Dec 2 01:57:10 2021
s30	0.10861430810476376	0.9726465029064116	670	0.5563169528922223	0.12050190776459567	lasso_tessels0362_alpha_-5	LASSO	glm7	sc1	sess	True	True	tessels0362	cerebellum_suit	True	4	crossed	False	-5	Thu Dec 2 02:10:40 2021
s31	0.10415071003821426	0.9629145421052528	670	0.4503640259752337	0.14784084535121872	lasso_tessels0362_alpha_-5	LASSO	glm7	sc1	sess	True	True	tessels0362	cerebellum_suit	True	4	crossed	False	-5	Thu Dec 2 02:22:57 2021
s02	0.09437796350727506	0.9725198567219	1190	0.4026802676707985	0.3671103476840081	lasso_tessels0642_alpha_-5	LASSO	glm7	sc1	sess	True	True	tessels0642	cerebellum_suit	True	4	crossed	False	-5	Wed Dec 1 09:44:08 2021
s03	0.10312866930707512	0.976318924858708	1190	0.458516503432407	0.44678753997522014	lasso_tessels0642_alpha_-5	LASSO	glm7	sc1	sess	True	True	tessels0642	cerebellum_suit	True	4	crossed	False	-5	Wed Dec 1 10:12:12 2021
s04	0.08994091734837838	0.9732404056454554	1190	0.4142579415351817	0.2611933922350682	lasso_tessels0642_alpha_-5	LASSO	glm7	sc1	sess	True	True	tessels0642	cerebellum_suit	True	4	crossed	False	-5	Wed Dec 1 10:36:46 2021
s06	0.09364473159085476	0.9694009257362954	1190	0.384783525250857	0.4030518925257569	lasso_tessels0642_alpha_-5	LASSO	glm7	sc1	sess	True	True	tessels0642	cerebellum_suit	True	4	crossed	False	-5	Wed Dec 1 10:56:12 2021
s08	0.11446300193637765	0.97044213016875	1190	0.5698652088020093	0.10620889256397427	lasso_tessels0642_alpha_-5	LASSO	glm7	sc1	sess	True	True	tessels0642	cerebellum_suit	True	4	crossed	False	-5	Wed Dec 1 11:31:12 2021
s09	0.10153679187638696	0.9659974201201912	1190	0.4066792120788777	0.32716114976259536	lasso_tessels0642_alpha_-5	LASSO	glm7	sc1	sess	True	True	tessels0642	cerebellum_suit	True	4	crossed	False	-5	Wed Dec 1 12:02:50 2021
s10	0.10510156661683508	0.9707428758212332	1190	0.4650475408402643	0.3397389222117778	lasso_tessels0642_alpha_-5	LASSO	glm7	sc1	sess	True	True	tessels0642	cerebellum_suit	True	4	crossed	False	-5	Wed Dec 1 12:30:49 2021
s12	0.09564584432708394	0.9750036143328475	1190	0.466282174759024	0.2534484778490931	lasso_tessels0642_alpha_-5	LASSO	glm7	sc1	sess	True	True	tessels0642	cerebellum_suit	True	4	crossed	False	-5	Wed Dec 1 12:55:06 2021
s14	0.11066534571964418	0.959735999201724	1190	0.4459259137711784	0.20834411514378728	lasso_tessels0642_alpha_-5	LASSO	glm7	sc1	sess	True	True	tessels0642	cerebellum_suit	True	4	crossed	False	-5	Wed Dec 1 13:25:41 2021
s15	0.09823088868453618	0.9723729854895616	1190	0.4603294603953248	0.2380506129952426	lasso_tessels0642_alpha_-5	LASSO	glm7	sc1	sess	True	True	tessels0642	cerebellum_suit	True	4	crossed	False	-5	Wed Dec 1 13:51:06 2021
s17	0.1007159150488858	0.9759434416323932	1190	0.4641026258105465	0.399510407147283	lasso_tessels0642_alpha_-5	LASSO	glm7	sc1	sess	True	True	tessels0642	cerebellum_suit	True	4	crossed	False	-5	Wed Dec 1 14:15:33 2021
s18	0.08593338313584599	0.9676665572508244	1190	0.3677477153580481	0.20618818494518806	lasso_tessels0642_alpha_-5	LASSO	glm7	sc1	sess	True	True	tessels0642	cerebellum_suit	True	4	crossed	False	-5	Wed Dec 1 14:34:21 2021
s19	0.09945661978602008	0.9531898530941676	1190	0.34600688772444704	0.2957141032332272	lasso_tessels0642_alpha_-5	LASSO	glm7	sc1	sess	True	True	tessels0642	cerebellum_suit	True	4	crossed	False	-5	Wed Dec 1 14:57:50 2021
s20	0.10351743260909124	0.9650382852689952	1190	0.42163105653336974	0.2907563515958011	lasso_tessels0642_alpha_-5	LASSO	glm7	sc1	sess	True	True	tessels0642	cerebellum_suit	True	4	crossed	False	-5	Wed Dec 1 15:27:01 2021
s21	0.09635480016710933	0.9750557323577196	1190	0.5265798966827762	0.03185381840650793	lasso_tessels0642_alpha_-5	LASSO	glm7	sc1	sess	True	True	tessels0642	cerebellum_suit	True	4	crossed	False	-5	Wed Dec 1 15:52:33 2021
s22	0.09338385801132278	0.9816130143182064	1190	0.4862368693386354	0.4163295492180645	lasso_tessels0642_alpha_-5	LASSO	glm7	sc1	sess	True	True	tessels0642	cerebellum_suit	True	4	crossed	False	-5	Wed Dec 1 16:15:15 2021
s24	0.09992502926658048	0.9723881046023936	1190	0.4933872404863062	0.1867269198474924	lasso_tessels0642_alpha_-5	LASSO	glm7	sc1	sess	True	True	tessels0642	cerebellum_suit	True	4	crossed	False	-5	Wed Dec 1 16:42:42 2021
s25	0.09519988546376253	0.9742184912909658	1190	0.4615533869190668	0.20508871086406866	lasso_tessels0642_alpha_-5	LASSO	glm7	sc1	sess	True	True	tessels0642	cerebellum_suit	True	4	crossed	False	-5	Wed Dec 1 17:08:12 2021
s26	0.10411745410613342	0.9666614324128128	1190	0.4357833168917981	0.257439252698605	lasso_tessels0642_alpha_-5	LASSO	glm7	sc1	sess	True	True	tessels0642	cerebellum_suit	True	4	crossed	False	-5	Wed Dec 1 17:36:16 2021
s27	0.09899345671331053	0.968408584551434	1190	0.447566235157971	0.2283480415525765	lasso_tessels0642_alpha_-5	LASSO	glm7	sc1	sess	True	True	tessels0642	cerebellum_suit	True	4	crossed	False	-5	Wed Dec 1 18:06:21 2021
s28	0.09657916640664332	0.9680667949086164	1190	0.4282260939002525	0.20556697589858847	lasso_tessels0642_alpha_-5	LASSO	glm7	sc1	sess	True	True	tessels0642	cerebellum_suit	True	4	crossed	False	-5	Wed Dec 1 18:30:01 2021
s29	0.10803949790101076	0.9810609849392208	1190	0.6297512558905508	0.18790819654885976	lasso_tessels0642_alpha_-5	LASSO	glm7	sc1	sess	True	True	tessels0642	cerebellum_suit	True	4	crossed	False	-5	Wed Dec 1 19:03:47 2021
s30	0.09148330255945417	0.9811330525589396	1190	0.5557932617478838	0.11203012843938864	lasso_tessels0642_alpha_-5	LASSO	glm7	sc1	sess	True	True	tessels0642	cerebellum_suit	True	4	crossed	False	-5	Wed Dec 1 19:26:19 2021
s31	0.08638177143931212	0.9756197545246182	1190	0.4486663526460518	0.1411662499903522	lasso_tessels0642_alpha_-5	LASSO	glm7	sc1	sess	True	True	tessels0642	cerebellum_suit	True	4	crossed	False	-5	Wed Dec 1 19:47:01 2021
s02	0.14266476868330707	0.9310636083333816	304	0.3979769524677853	0.3740309278116571	lasso_tessels0162_alpha_-5	LASSO	glm7	sc1	sess	True	True	tessels0162	cerebellum_suit	True	4	crossed	False	-5	Tue Nov 30 23:34:44 2021
s03	0.1511740896804763	0.945154882034226	304	0.4665326609644456	0.4389542497374048	lasso_tessels0162_alpha_-5	LASSO	glm7	sc1	sess	True	True	tessels0162	cerebellum_suit	True	4	crossed	False	-5	Tue Nov 30 23:44:29 2021
s04	0.13024076098791107	0.9404711298746924	304	0.4274257464258493	0.23149226867964004	lasso_tessels0162_alpha_-5	LASSO	glm7	sc1	sess	True	True	tessels0162	cerebellum_suit	True	4	crossed	False	-5	Tue Nov 30 23:53:33 2021
s06	0.13428168832586174	0.9327471505839936	304	0.3860327458504553	0.3977381029716149	lasso_tessels0162_alpha_-5	LASSO	glm7	sc1	sess	True	True	tessels0162	cerebellum_suit	True	4	crossed	False	-5	Tue Nov 30 23:59:17 2021
s08	0.1743569971482243	0.9253883088286816	304	0.5584899692591625	0.12818505878222433	lasso_tessels0162_alpha_-5	LASSO	glm7	sc1	sess	True	True	tessels0162	cerebellum_suit	True	4	crossed	False	-5	Wed Dec 1 00:11:37 2021
s09	0.15322427571687938	0.9148281910182614	304	0.3961336040640949	0.3544827170962667	lasso_tessels0162_alpha_-5	LASSO	glm7	sc1	sess	True	True	tessels0162	cerebellum_suit	True	4	crossed	False	-5	Wed Dec 1 00:21:49 2021
s10	0.15731962786101275	0.9291086825147282	304	0.4512875883493384	0.365643013534445	lasso_tessels0162_alpha_-5	LASSO	glm7	sc1	sess	True	True	tessels0162	cerebellum_suit	True	4	crossed	False	-5	Wed Dec 1 00:30:58 2021
s12	0.14997694618883786	0.9326656447311776	304	0.4657229046381858	0.2696847635419682	lasso_tessels0162_alpha_-5	LASSO	glm7	sc1	sess	True	True	tessels0162	cerebellum_suit	True	4	crossed	False	-5	Wed Dec 1 00:39:24 2021
s14	0.15850391562112176	0.9099539691585428	304	0.43854906824866	0.21338965325351086	lasso_tessels0162_alpha_-5	LASSO	glm7	sc1	sess	True	True	tessels0162	cerebellum_suit	True	4	crossed	False	-5	Wed Dec 1 00:48:30 2021
s15	0.1435028285883087	0.9367400647743966	304	0.4706285834148257	0.2277091670035409	lasso_tessels0162_alpha_-5	LASSO	glm7	sc1	sess	True	True	tessels0162	cerebellum_suit	True	4	crossed	False	-5	Wed Dec 1 00:56:39 2021
s17	0.15274830831039798	0.9397795985419306	304	0.48052911137178295	0.3773747719042851	lasso_tessels0162_alpha_-5	LASSO	glm7	sc1	sess	True	True	tessels0162	cerebellum_suit	True	4	crossed	False	-5	Wed Dec 1 01:03:33 2021
s18	0.1235114348042922	0.927478302141874	304	0.3619629267292469	0.2340682366962427	lasso_tessels0162_alpha_-5	LASSO	glm7	sc1	sess	True	True	tessels0162	cerebellum_suit	True	4	crossed	False	-5	Wed Dec 1 01:09:22 2021
s19	0.14267404393612368	0.8917499405271342	304	0.337942358921771	0.3209734354842353	lasso_tessels0162_alpha_-5	LASSO	glm7	sc1	sess	True	True	tessels0162	cerebellum_suit	True	4	crossed	False	-5	Wed Dec 1 01:16:10 2021
s20	0.15546895687985826	0.9120898790885844	304	0.4107868155411353	0.3198531816136689	lasso_tessels0162_alpha_-5	LASSO	glm7	sc1	sess	True	True	tessels0162	cerebellum_suit	True	4	crossed	False	-5	Wed Dec 1 01:25:55 2021
s21	0.1380443999759311	0.9454610111653632	304	0.5267628834227764	0.04017331673083002	lasso_tessels0162_alpha_-5	LASSO	glm7	sc1	sess	True	True	tessels0162	cerebellum_suit	True	4	crossed	False	-5	Wed Dec 1 01:34:13 2021
s22	0.1450066671521053	0.9519909531588088	304	0.4953226636683782	0.4098855877008445	lasso_tessels0162_alpha_-5	LASSO	glm7	sc1	sess	True	True	tessels0162	cerebellum_suit	True	4	crossed	False	-5	Wed Dec 1 01:41:10 2021
s24	0.15057178151079553	0.9321335476908288	304	0.4994467300949098	0.18742110742751425	lasso_tessels0162_alpha_-5	LASSO	glm7	sc1	sess	True	True	tessels0162	cerebellum_suit	True	4	crossed	False	-5	Wed Dec 1 01:50:17 2021
s25	0.14373346261122372	0.9367307576442212	304	0.4584017884906805	0.21416256148677468	lasso_tessels0162_alpha_-5	LASSO	glm7	sc1	sess	True	True	tessels0162	cerebellum_suit	True	4	crossed	False	-5	Wed Dec 1 01:59:02 2021
s26	0.15440390336418233	0.9189507077703276	304	0.42345400007308975	0.2913993500905597	lasso_tessels0162_alpha_-5	LASSO	glm7	sc1	sess	True	True	tessels0162	cerebellum_suit	True	4	crossed	False	-5	Wed Dec 1 02:07:45 2021
s27	0.14492489051179536	0.9270469865662384	304	0.4448815967389883	0.2602883763382587	lasso_tessels0162_alpha_-5	LASSO	glm7	sc1	sess	True	True	tessels0162	cerebellum_suit	True	4	crossed	False	-5	Wed Dec 1 02:18:03 2021
s28	0.1460248637630112	0.9198200507755224	304	0.4329904996530624	0.19066727394258232	lasso_tessels0162_alpha_-5	LASSO	glm7	sc1	sess	True	True	tessels0162	cerebellum_suit	True	4	crossed	False	-5	Wed Dec 1 02:25:43 2021
s29	0.16302848902350686	0.9540623401845832	304	0.650906791579578	0.17109757287241664	lasso_tessels0162_alpha_-5	LASSO	glm7	sc1	sess	True	True	tessels0162	cerebellum_suit	True	4	crossed	False	-5	Wed Dec 1 02:37:15 2021
s30	0.13920075396542445	0.9530798753234736	304	0.5723925663341826	0.1007443689193888	lasso_tessels0162_alpha_-5	LASSO	glm7	sc1	sess	True	True	tessels0162	cerebellum_suit	True	4	crossed	False	-5	Wed Dec 1 02:44:15 2021
s31	0.1332922723129214	0.9354099115243772	304	0.4554416175681934	0.14093251016378444	lasso_tessels0162_alpha_-5	LASSO	glm7	sc1	sess	True	True	tessels0162	cerebellum_suit	True	4	crossed	False	-5	Wed Dec 1 02:50:38 2021
s02	0.14840195356287428	0.930071936694976	1848	0.3778066170356058	0.3948613067358269	lasso_tessels1002_alpha_-4	LASSO	glm7	sc1	sess	True	True	tessels1002	cerebellum_suit	True	4	crossed	False	-4	Tue Nov 30 12:08:18 2021
s03	0.1579368472169638	0.9438348317672336	1848	0.4355550638669917	0.4627820791564121	lasso_tessels1002_alpha_-4	LASSO	glm7	sc1	sess	True	True	tessels1002	cerebellum_suit	True	4	crossed	False	-4	Tue Nov 30 12:23:26 2021
s04	0.13637817972030353	0.9388601611587918	1848	0.3937930360402207	0.2795018299604096	lasso_tessels1002_alpha_-4	LASSO	glm7	sc1	sess	True	True	tessels1002	cerebellum_suit	True	4	crossed	False	-4	Tue Nov 30 12:36:40 2021
s06	0.1382998311037848	0.9328869838955918	1848	0.3595069820052115	0.4298305853439516	lasso_tessels1002_alpha_-4	LASSO	glm7	sc1	sess	True	True	tessels1002	cerebellum_suit	True	4	crossed	False	-4	Tue Nov 30 12:48:39 2021
s08	0.17856755219828369	0.9272549828058584	1848	0.5293044673304405	0.13137014490233928	lasso_tessels1002_alpha_-4	LASSO	glm7	sc1	sess	True	True	tessels1002	cerebellum_suit	True	4	crossed	False	-4	Tue Nov 30 13:05:26 2021
s09	0.15344084734719635	0.9206058049521992	1848	0.37957318883698404	0.3524183671957315	lasso_tessels1002_alpha_-4	LASSO	glm7	sc1	sess	True	True	tessels1002	cerebellum_suit	True	4	crossed	False	-4	Tue Nov 30 13:20:41 2021
s10	0.15838074581939354	0.9329455173591448	1848	0.4332666098046082	0.3616275118437052	lasso_tessels1002_alpha_-4	LASSO	glm7	sc1	sess	True	True	tessels1002	cerebellum_suit	True	4	crossed	False	-4	Tue Nov 30 13:35:16 2021
s12	0.150750081454576	0.9372295890975748	1848	0.4386189047325425	0.2705452325366012	lasso_tessels1002_alpha_-4	LASSO	glm7	sc1	sess	True	True	tessels1002	cerebellum_suit	True	4	crossed	False	-4	Tue Nov 30 13:48:22 2021
s14	0.16437500541608596	0.9099488173825656	1848	0.4193588849235777	0.21740401980491286	lasso_tessels1002_alpha_-4	LASSO	glm7	sc1	sess	True	True	tessels1002	cerebellum_suit	True	4	crossed	False	-4	Tue Nov 30 14:03:59 2021
s15	0.14896484168070834	0.9371304095756178	1848	0.43630301375529307	0.2604958715787719	lasso_tessels1002_alpha_-4	LASSO	glm7	sc1	sess	True	True	tessels1002	cerebellum_suit	True	4	crossed	False	-4	Tue Nov 30 14:18:12 2021
s17	0.15610666723696934	0.9408012918748409	1848	0.43857521612853934	0.41373291105574345	lasso_tessels1002_alpha_-4	LASSO	glm7	sc1	sess	True	True	tessels1002	cerebellum_suit	True	4	crossed	False	-4	Tue Nov 30 14:32:55 2021
s18	0.13225035891093104	0.9241124760914684	1848	0.3469637188752698	0.22212350660035649	lasso_tessels1002_alpha_-4	LASSO	glm7	sc1	sess	True	True	tessels1002	cerebellum_suit	True	4	crossed	False	-4	Tue Nov 30 14:43:41 2021
s19	0.1495059087011638	0.8891777149169187	1848	0.3281219790722789	0.2945259706697794	lasso_tessels1002_alpha_-4	LASSO	glm7	sc1	sess	True	True	tessels1002	cerebellum_suit	True	4	crossed	False	-4	Tue Nov 30 14:55:26 2021
s20	0.1574461076389622	0.916434354829342	1848	0.3922743501931867	0.3194090064647727	lasso_tessels1002_alpha_-4	LASSO	glm7	sc1	sess	True	True	tessels1002	cerebellum_suit	True	4	crossed	False	-4	Tue Nov 30 15:10:16 2021
s21	0.15009242347571558	0.9406446620830874	1848	0.4972559113493945	0.03201904587787624	lasso_tessels1002_alpha_-4	LASSO	glm7	sc1	sess	True	True	tessels1002	cerebellum_suit	True	4	crossed	False	-4	Tue Nov 30 15:24:01 2021
s22	0.1488454582437582	0.9525415146830234	1848	0.4641505613127783	0.4304401894260126	lasso_tessels1002_alpha_-4	LASSO	glm7	sc1	sess	True	True	tessels1002	cerebellum_suit	True	4	crossed	False	-4	Tue Nov 30 15:37:44 2021
s24	0.15254649307707274	0.9359799018101984	1848	0.4617710478508194	0.2082608234963801	lasso_tessels1002_alpha_-4	LASSO	glm7	sc1	sess	True	True	tessels1002	cerebellum_suit	True	4	crossed	False	-4	Tue Nov 30 15:52:51 2021
s25	0.14740375561134084	0.93872631381325	1848	0.443654330587331	0.2053544678741709	lasso_tessels1002_alpha_-4	LASSO	glm7	sc1	sess	True	True	tessels1002	cerebellum_suit	True	4	crossed	False	-4	Tue Nov 30 16:06:20 2021
s26	0.160566725164595	0.9184079225723172	1848	0.4110996178465021	0.2626503029062932	lasso_tessels1002_alpha_-4	LASSO	glm7	sc1	sess	True	True	tessels1002	cerebellum_suit	True	4	crossed	False	-4	Tue Nov 30 16:20:04 2021
s27	0.14372273727948562	0.935109459163927	1848	0.4186102384191289	0.2563674446444752	lasso_tessels1002_alpha_-4	LASSO	glm7	sc1	sess	True	True	tessels1002	cerebellum_suit	True	4	crossed	False	-4	Tue Nov 30 16:35:35 2021
s28	0.1508830369967714	0.9208766112230994	1848	0.3993756591456207	0.21294979047551893	lasso_tessels1002_alpha_-4	LASSO	glm7	sc1	sess	True	True	tessels1002	cerebellum_suit	True	4	crossed	False	-4	Tue Nov 30 16:47:57 2021
s29	0.16725935494725427	0.9553270891766614	1848	0.6016024046653615	0.19627514411752653	lasso_tessels1002_alpha_-4	LASSO	glm7	sc1	sess	True	True	tessels1002	cerebellum_suit	True	4	crossed	False	-4	Tue Nov 30 17:06:50 2021
s30	0.14606869665292538	0.9524654612916968	1848	0.5306482214971652	0.09879166028170684	lasso_tessels1002_alpha_-4	LASSO	glm7	sc1	sess	True	True	tessels1002	cerebellum_suit	True	4	crossed	False	-4	Tue Nov 30 17:20:59 2021
s31	0.14118178979134038	0.9337606531867	1848	0.4129881092269326	0.16155323597986232	lasso_tessels1002_alpha_-4	LASSO	glm7	sc1	sess	True	True	tessels1002	cerebellum_suit	True	4	crossed	False	-4	Tue Nov 30 17:32:26 2021
s02	0.22412893467372755	0.8272640432332125	1848	0.3545760512485153	0.4208815588552876	lasso_tessels1002_alpha_-3	LASSO	glm7	sc1	sess	True	True	tessels1002	cerebellum_suit	True	4	crossed	False	-3	Tue Nov 30 17:37:38 2021
s03	0.24281248397337754	0.8563500959807987	1848	0.4148067438929274	0.4742801820996106	lasso_tessels1002_alpha_-3	LASSO	glm7	sc1	sess	True	True	tessels1002	cerebellum_suit	True	4	crossed	False	-3	Tue Nov 30 17:43:53 2021
s04	0.2122584853093	0.8426884685416842	1848	0.3679224366693173	0.3058503961262906	lasso_tessels1002_alpha_-3	LASSO	glm7	sc1	sess	True	True	tessels1002	cerebellum_suit	True	4	crossed	False	-3	Tue Nov 30 17:49:56 2021
s06	0.20685784212235825	0.8403751936537474	1848	0.33960837602360355	0.44432085884285255	lasso_tessels1002_alpha_-3	LASSO	glm7	sc1	sess	True	True	tessels1002	cerebellum_suit	True	4	crossed	False	-3	Tue Nov 30 17:55:24 2021
s08	0.2760532026885613	0.8136071452623465	1848	0.4798208426636674	0.15355762267559292	lasso_tessels1002_alpha_-3	LASSO	glm7	sc1	sess	True	True	tessels1002	cerebellum_suit	True	4	crossed	False	-3	Tue Nov 30 18:01:41 2021
s09	0.2307029304970893	0.7997080602510663	1848	0.35412269903551896	0.3834884418745241	lasso_tessels1002_alpha_-3	LASSO	glm7	sc1	sess	True	True	tessels1002	cerebellum_suit	True	4	crossed	False	-3	Tue Nov 30 18:07:51 2021
s10	0.2407638857880922	0.8329805999284682	1848	0.4019137518036129	0.3861241079636169	lasso_tessels1002_alpha_-3	LASSO	glm7	sc1	sess	True	True	tessels1002	cerebellum_suit	True	4	crossed	False	-3	Tue Nov 30 18:13:59 2021
s12	0.2352608714470965	0.8348261089220232	1848	0.4058428521745879	0.2985170113464181	lasso_tessels1002_alpha_-3	LASSO	glm7	sc1	sess	True	True	tessels1002	cerebellum_suit	True	4	crossed	False	-3	Tue Nov 30 18:19:38 2021
s14	0.2442590839313739	0.7792753359590039	1848	0.3842761069656717	0.2488935178715891	lasso_tessels1002_alpha_-3	LASSO	glm7	sc1	sess	True	True	tessels1002	cerebellum_suit	True	4	crossed	False	-3	Tue Nov 30 18:26:22 2021
s15	0.2332511640381085	0.8383778769110332	1848	0.4086428054095667	0.2647102002315033	lasso_tessels1002_alpha_-3	LASSO	glm7	sc1	sess	True	True	tessels1002	cerebellum_suit	True	4	crossed	False	-3	Tue Nov 30 18:32:45 2021
s17	0.23497979803034444	0.8574862843909165	1848	0.4116580151828327	0.4398604870645839	lasso_tessels1002_alpha_-3	LASSO	glm7	sc1	sess	True	True	tessels1002	cerebellum_suit	True	4	crossed	False	-3	Tue Nov 30 18:39:32 2021
s18	0.20516808868916747	0.8057026823671564	1848	0.3264447097314983	0.2190606729407661	lasso_tessels1002_alpha_-3	LASSO	glm7	sc1	sess	True	True	tessels1002	cerebellum_suit	True	4	crossed	False	-3	Tue Nov 30 18:44:05 2021
s19	0.21435440247208493	0.7412910463438743	1848	0.3034859552051105	0.31836969149835803	lasso_tessels1002_alpha_-3	LASSO	glm7	sc1	sess	True	True	tessels1002	cerebellum_suit	True	4	crossed	False	-3	Tue Nov 30 18:48:55 2021
s20	0.23235149411153386	0.8002921454552195	1848	0.3628532535774971	0.3562132456196431	lasso_tessels1002_alpha_-3	LASSO	glm7	sc1	sess	True	True	tessels1002	cerebellum_suit	True	4	crossed	False	-3	Tue Nov 30 18:54:57 2021
s21	0.2399791239468004	0.8424600456249707	1848	0.4646553354236957	0.030112959967131005	lasso_tessels1002_alpha_-3	LASSO	glm7	sc1	sess	True	True	tessels1002	cerebellum_suit	True	4	crossed	False	-3	Tue Nov 30 19:01:06 2021
s22	0.2330509310139881	0.8750355601293647	1848	0.4337838916698701	0.4616138025547462	lasso_tessels1002_alpha_-3	LASSO	glm7	sc1	sess	True	True	tessels1002	cerebellum_suit	True	4	crossed	False	-3	Tue Nov 30 19:07:19 2021
s24	0.2398545286157249	0.827484981415696	1848	0.4256231555756744	0.23637899391441305	lasso_tessels1002_alpha_-3	LASSO	glm7	sc1	sess	True	True	tessels1002	cerebellum_suit	True	4	crossed	False	-3	Tue Nov 30 19:13:37 2021
s25	0.2319417259216075	0.8387031459860366	1848	0.4153076667297221	0.22409035308861647	lasso_tessels1002_alpha_-3	LASSO	glm7	sc1	sess	True	True	tessels1002	cerebellum_suit	True	4	crossed	False	-3	Tue Nov 30 19:19:02 2021
s26	0.2407838485706389	0.8000302251287768	1848	0.3814382419462321	0.2829096077512843	lasso_tessels1002_alpha_-3	LASSO	glm7	sc1	sess	True	True	tessels1002	cerebellum_suit	True	4	crossed	False	-3	Tue Nov 30 19:24:33 2021
s27	0.2253781091406737	0.8284900265973781	1848	0.3951334330090879	0.2565320904129277	lasso_tessels1002_alpha_-3	LASSO	glm7	sc1	sess	True	True	tessels1002	cerebellum_suit	True	4	crossed	False	-3	Tue Nov 30 19:31:03 2021
s28	0.2320972494709725	0.7941326250259254	1848	0.3683772787922575	0.2398078556395584	lasso_tessels1002_alpha_-3	LASSO	glm7	sc1	sess	True	True	tessels1002	cerebellum_suit	True	4	crossed	False	-3	Tue Nov 30 19:36:04 2021
s29	0.2710584192138597	0.8771216662887036	1848	0.5715514503334009	0.1866351031123517	lasso_tessels1002_alpha_-3	LASSO	glm7	sc1	sess	True	True	tessels1002	cerebellum_suit	True	4	crossed	False	-3	Tue Nov 30 19:43:04 2021
s30	0.2360480805051813	0.8704523273119952	1848	0.4956202442474288	0.11100673561929793	lasso_tessels1002_alpha_-3	LASSO	glm7	sc1	sess	True	True	tessels1002	cerebellum_suit	True	4	crossed	False	-3	Tue Nov 30 19:49:33 2021
s31	0.22513419609464266	0.8128248028959162	1848	0.3812996038289249	0.17004070214603034	lasso_tessels1002_alpha_-3	LASSO	glm7	sc1	sess	True	True	tessels1002	cerebellum_suit	True	4	crossed	False	-3	Tue Nov 30 19:54:25 2021
s02	0.24829872174461426	0.7490923617192385	80	0.3724290900968861	0.37411724403206176	lasso_tessels0042_alpha_-4	LASSO	glm7	sc1	sess	True	True	tessels0042	cerebellum_suit	True	4	crossed	False	-4	Tue Nov 30 11:28:41 2021
s03	0.2686775078868345	0.792605242541063	80	0.4290811654339704	0.4572418692708107	lasso_tessels0042_alpha_-4	LASSO	glm7	sc1	sess	True	True	tessels0042	cerebellum_suit	True	4	crossed	False	-4	Tue Nov 30 11:29:27 2021
s04	0.244751174127484	0.7466876272038062	80	0.3983407002077133	0.2120360578615312	lasso_tessels0042_alpha_-4	LASSO	glm7	sc1	sess	True	True	tessels0042	cerebellum_suit	True	4	crossed	False	-4	Tue Nov 30 11:30:17 2021
s06	0.22521595811130285	0.7787004294823053	80	0.35307776232779703	0.4212421982430923	lasso_tessels0042_alpha_-4	LASSO	glm7	sc1	sess	True	True	tessels0042	cerebellum_suit	True	4	crossed	False	-4	Tue Nov 30 11:30:52 2021
s08	0.3238645569939002	0.6807044255451896	80	0.487138352368984	0.15490922879966693	lasso_tessels0042_alpha_-4	LASSO	glm7	sc1	sess	True	True	tessels0042	cerebellum_suit	True	4	crossed	False	-4	Tue Nov 30 11:31:52 2021
s09	0.2532595702460983	0.7169559911693005	80	0.3517421671881566	0.4068818042949592	lasso_tessels0042_alpha_-4	LASSO	glm7	sc1	sess	True	True	tessels0042	cerebellum_suit	True	4	crossed	False	-4	Tue Nov 30 11:32:38 2021
s10	0.2676523215001599	0.7580454356175829	80	0.3952660906921305	0.4243907473435159	lasso_tessels0042_alpha_-4	LASSO	glm7	sc1	sess	True	True	tessels0042	cerebellum_suit	True	4	crossed	False	-4	Tue Nov 30 11:33:23 2021
s12	0.26993436822114003	0.7290496601441837	80	0.4157075747088739	0.28714829099851746	lasso_tessels0042_alpha_-4	LASSO	glm7	sc1	sess	True	True	tessels0042	cerebellum_suit	True	4	crossed	False	-4	Tue Nov 30 11:34:06 2021
s14	0.2623471492781678	0.7016625376168132	80	0.3857737954767919	0.2600033091691417	lasso_tessels0042_alpha_-4	LASSO	glm7	sc1	sess	True	True	tessels0042	cerebellum_suit	True	4	crossed	False	-4	Tue Nov 30 11:34:51 2021
s15	0.26026718136741883	0.7533382321707017	80	0.4172949721191588	0.2628051816184903	lasso_tessels0042_alpha_-4	LASSO	glm7	sc1	sess	True	True	tessels0042	cerebellum_suit	True	4	crossed	False	-4	Tue Nov 30 11:35:38 2021
s17	0.2666259644569836	0.7796463441358006	80	0.4330307313869605	0.408895223504931	lasso_tessels0042_alpha_-4	LASSO	glm7	sc1	sess	True	True	tessels0042	cerebellum_suit	True	4	crossed	False	-4	Tue Nov 30 11:36:18 2021
s18	0.2204885541326995	0.7222572961766472	80	0.3344572758155695	0.22932521050672705	lasso_tessels0042_alpha_-4	LASSO	glm7	sc1	sess	True	True	tessels0042	cerebellum_suit	True	4	crossed	False	-4	Tue Nov 30 11:36:54 2021
s19	0.22343714005448706	0.6768382502006578	80	0.3082610093244611	0.3298790495451098	lasso_tessels0042_alpha_-4	LASSO	glm7	sc1	sess	True	True	tessels0042	cerebellum_suit	True	4	crossed	False	-4	Tue Nov 30 11:37:28 2021
s20	0.2564603763912457	0.7066760475345756	80	0.36156437547626397	0.3783631013032014	lasso_tessels0042_alpha_-4	LASSO	glm7	sc1	sess	True	True	tessels0042	cerebellum_suit	True	4	crossed	False	-4	Tue Nov 30 11:38:13 2021
s21	0.2738406850737314	0.7397546656729256	80	0.4799489601456909	0.03142443067362313	lasso_tessels0042_alpha_-4	LASSO	glm7	sc1	sess	True	True	tessels0042	cerebellum_suit	True	4	crossed	False	-4	Tue Nov 30 11:39:01 2021
s22	0.2594929686928954	0.8200559445068696	80	0.4397267080858839	0.4706959183314113	lasso_tessels0042_alpha_-4	LASSO	glm7	sc1	sess	True	True	tessels0042	cerebellum_suit	True	4	crossed	False	-4	Tue Nov 30 11:39:41 2021
s24	0.27314188604265305	0.7201497347713035	80	0.4340100557978279	0.2308478821805676	lasso_tessels0042_alpha_-4	LASSO	glm7	sc1	sess	True	True	tessels0042	cerebellum_suit	True	4	crossed	False	-4	Tue Nov 30 11:40:28 2021
s25	0.2648606909548684	0.7396872135214858	80	0.42630258219250816	0.21381405781688484	lasso_tessels0042_alpha_-4	LASSO	glm7	sc1	sess	True	True	tessels0042	cerebellum_suit	True	4	crossed	False	-4	Tue Nov 30 11:41:14 2021
s26	0.26511078654818865	0.7082492258770218	80	0.3906164483047192	0.2653443327849169	lasso_tessels0042_alpha_-4	LASSO	glm7	sc1	sess	True	True	tessels0042	cerebellum_suit	True	4	crossed	False	-4	Tue Nov 30 11:41:56 2021
s27	0.25649786397763863	0.7242790595145877	80	0.3965458828993577	0.2850389502936437	lasso_tessels0042_alpha_-4	LASSO	glm7	sc1	sess	True	True	tessels0042	cerebellum_suit	True	4	crossed	False	-4	Tue Nov 30 11:42:51 2021
s28	0.25740476900643416	0.6870273795415854	80	0.38476036523392215	0.2190064947693897	lasso_tessels0042_alpha_-4	LASSO	glm7	sc1	sess	True	True	tessels0042	cerebellum_suit	True	4	crossed	False	-4	Tue Nov 30 11:43:29 2021
s29	0.3240160840232721	0.7805365733779069	80	0.5851337779347495	0.2076268256133645	lasso_tessels0042_alpha_-4	LASSO	glm7	sc1	sess	True	True	tessels0042	cerebellum_suit	True	4	crossed	False	-4	Tue Nov 30 11:44:38 2021
s30	0.2699843721278103	0.7875033197993334	80	0.5112367285315437	0.15070105756045318	lasso_tessels0042_alpha_-4	LASSO	glm7	sc1	sess	True	True	tessels0042	cerebellum_suit	True	4	crossed	False	-4	Tue Nov 30 11:45:20 2021
s31	0.24733309462206224	0.7195904466696281	80	0.4023915063578533	0.15545784875889607	lasso_tessels0042_alpha_-4	LASSO	glm7	sc1	sess	True	True	tessels0042	cerebellum_suit	True	4	crossed	False	-4	Tue Nov 30 11:45:57 2021
s02	0.2872062091421788	0.6374728546451637	80	0.356846159874086	0.3833979281690059	lasso_tessels0042_alpha_-3	LASSO	glm7	sc1	sess	True	True	tessels0042	cerebellum_suit	True	4	crossed	False	-3	Tue Nov 30 11:46:17 2021
s03	0.3161648320896279	0.6914862796102467	80	0.4155361961464934	0.4511026987857107	lasso_tessels0042_alpha_-3	LASSO	glm7	sc1	sess	True	True	tessels0042	cerebellum_suit	True	4	crossed	False	-3	Tue Nov 30 11:46:38 2021
s04	0.29141638723453483	0.5864197226812845	80	0.3744962000552075	0.22491383969367085	lasso_tessels0042_alpha_-3	LASSO	glm7	sc1	sess	True	True	tessels0042	cerebellum_suit	True	4	crossed	False	-3	Tue Nov 30 11:47:04 2021
s06	0.2628424979900832	0.6785666151928705	80	0.3358848654890796	0.4360555407709741	lasso_tessels0042_alpha_-3	LASSO	glm7	sc1	sess	True	True	tessels0042	cerebellum_suit	True	4	crossed	False	-3	Tue Nov 30 11:47:24 2021
s08	0.3753512871159494	0.515583743522382	80	0.4524328227209598	0.1683993714347488	lasso_tessels0042_alpha_-3	LASSO	glm7	sc1	sess	True	True	tessels0042	cerebellum_suit	True	4	crossed	False	-3	Tue Nov 30 11:47:50 2021
s09	0.2893821441664188	0.5953261296558113	80	0.3409252384946693	0.4154734305394852	lasso_tessels0042_alpha_-3	LASSO	glm7	sc1	sess	True	True	tessels0042	cerebellum_suit	True	4	crossed	False	-3	Tue Nov 30 11:48:13 2021
s10	0.3120898163218975	0.6450780933100078	80	0.3803252653303072	0.4283358798987363	lasso_tessels0042_alpha_-3	LASSO	glm7	sc1	sess	True	True	tessels0042	cerebellum_suit	True	4	crossed	False	-3	Tue Nov 30 11:48:34 2021
s12	0.3133211517461097	0.6018948686122566	80	0.3918629736633699	0.30382039043224834	lasso_tessels0042_alpha_-3	LASSO	glm7	sc1	sess	True	True	tessels0042	cerebellum_suit	True	4	crossed	False	-3	Tue Nov 30 11:48:55 2021
s14	0.3011351813255296	0.5712572030261146	80	0.36322126850630587	0.28956250622971524	lasso_tessels0042_alpha_-3	LASSO	glm7	sc1	sess	True	True	tessels0042	cerebellum_suit	True	4	crossed	False	-3	Tue Nov 30 11:49:18 2021
s15	0.31241569590025325	0.6103884043389617	80	0.3956794779820311	0.2461585429789704	lasso_tessels0042_alpha_-3	LASSO	glm7	sc1	sess	True	True	tessels0042	cerebellum_suit	True	4	crossed	False	-3	Tue Nov 30 11:49:41 2021
s17	0.3069996770493032	0.6887953652630685	80	0.4123805688998943	0.42245742911072587	lasso_tessels0042_alpha_-3	LASSO	glm7	sc1	sess	True	True	tessels0042	cerebellum_suit	True	4	crossed	False	-3	Tue Nov 30 11:50:04 2021
s18	0.26238354054881025	0.5680522420518627	80	0.3174401167984911	0.2090256902575492	lasso_tessels0042_alpha_-3	LASSO	glm7	sc1	sess	True	True	tessels0042	cerebellum_suit	True	4	crossed	False	-3	Tue Nov 30 11:50:22 2021
s19	0.2536117480488895	0.5434717305900981	80	0.2969916556353349	0.322850524332473	lasso_tessels0042_alpha_-3	LASSO	glm7	sc1	sess	True	True	tessels0042	cerebellum_suit	True	4	crossed	False	-3	Tue Nov 30 11:50:41 2021
s20	0.28968195530991364	0.5994147667211002	80	0.3472829322564965	0.3876367380748835	lasso_tessels0042_alpha_-3	LASSO	glm7	sc1	sess	True	True	tessels0042	cerebellum_suit	True	4	crossed	False	-3	Tue Nov 30 11:51:03 2021
s21	0.331653696714439	0.5701181239868586	80	0.4340081487268244	0.04561831740390358	lasso_tessels0042_alpha_-3	LASSO	glm7	sc1	sess	True	True	tessels0042	cerebellum_suit	True	4	crossed	False	-3	Tue Nov 30 11:51:24 2021
s22	0.3084268933424424	0.7291106444390819	80	0.4172153305648846	0.4876188543024679	lasso_tessels0042_alpha_-3	LASSO	glm7	sc1	sess	True	True	tessels0042	cerebellum_suit	True	4	crossed	False	-3	Tue Nov 30 11:51:45 2021
s24	0.3177893193142831	0.5812587735236401	80	0.3965880878023113	0.28644762930827994	lasso_tessels0042_alpha_-3	LASSO	glm7	sc1	sess	True	True	tessels0042	cerebellum_suit	True	4	crossed	False	-3	Tue Nov 30 11:52:07 2021
s25	0.3142832148674781	0.5922519045374778	80	0.3991367934355486	0.22854671142811114	lasso_tessels0042_alpha_-3	LASSO	glm7	sc1	sess	True	True	tessels0042	cerebellum_suit	True	4	crossed	False	-3	Tue Nov 30 11:52:29 2021
s26	0.3063815836866378	0.5761376788644473	80	0.3720537646896378	0.2703182126388889	lasso_tessels0042_alpha_-3	LASSO	glm7	sc1	sess	True	True	tessels0042	cerebellum_suit	True	4	crossed	False	-3	Tue Nov 30 11:52:49 2021
s27	0.3011374384060827	0.5653335394030334	80	0.37468195094831735	0.28905650064607136	lasso_tessels0042_alpha_-3	LASSO	glm7	sc1	sess	True	True	tessels0042	cerebellum_suit	True	4	crossed	False	-3	Tue Nov 30 11:53:12 2021
s28	0.2959427876333444	0.5457217684932145	80	0.3571284229445649	0.2525863478417819	lasso_tessels0042_alpha_-3	LASSO	glm7	sc1	sess	True	True	tessels0042	cerebellum_suit	True	4	crossed	False	-3	Tue Nov 30 11:53:31 2021
s29	0.3949599831540915	0.6310878562996541	80	0.5484879063892487	0.18665708696405184	lasso_tessels0042_alpha_-3	LASSO	glm7	sc1	sess	True	True	tessels0042	cerebellum_suit	True	4	crossed	False	-3	Tue Nov 30 11:53:55 2021
s30	0.32818215516662075	0.6561546581592139	80	0.4692229390392874	0.15529591014946484	lasso_tessels0042_alpha_-3	LASSO	glm7	sc1	sess	True	True	tessels0042	cerebellum_suit	True	4	crossed	False	-3	Tue Nov 30 11:54:17 2021
s31	0.2919644927322748	0.5630941172301516	80	0.3711012186156667	0.14789711688597007	lasso_tessels0042_alpha_-3	LASSO	glm7	sc1	sess	True	True	tessels0042	cerebellum_suit	True	4	crossed	False	-3	Tue Nov 30 11:54:36 2021
s02	0.3230315287526886	0.4874529687133656	80	0.3592934107180684	0.3446487853443223	lasso_tessels0042_alpha_-2	LASSO	glm7	sc1	sess	True	True	tessels0042	cerebellum_suit	True	4	crossed	False	-2	Tue Nov 30 11:15:21 2021
s03	0.3620257030721639	0.5469584239820049	80	0.42017449304869336	0.4026422834573464	lasso_tessels0042_alpha_-2	LASSO	glm7	sc1	sess	True	True	tessels0042	cerebellum_suit	True	4	crossed	False	-2	Tue Nov 30 11:15:37 2021
s04	0.3217343166040048	0.4021777914432811	80	0.3687438782035805	0.20072170565879693	lasso_tessels0042_alpha_-2	LASSO	glm7	sc1	sess	True	True	tessels0042	cerebellum_suit	True	4	crossed	False	-2	Tue Nov 30 11:15:55 2021
s06	0.3002390513264009	0.5350726573633775	80	0.33556366361705803	0.4100546573056015	lasso_tessels0042_alpha_-2	LASSO	glm7	sc1	sess	True	True	tessels0042	cerebellum_suit	True	4	crossed	False	-2	Tue Nov 30 11:16:11 2021
s08	0.4110820491363165	0.299839312722798	80	0.4382772390475711	0.16043240147932095	lasso_tessels0042_alpha_-2	LASSO	glm7	sc1	sess	True	True	tessels0042	cerebellum_suit	True	4	crossed	False	-2	Tue Nov 30 11:16:27 2021
s09	0.3172352396800008	0.4581512350810845	80	0.34670711958369155	0.37761380568265657	lasso_tessels0042_alpha_-2	LASSO	glm7	sc1	sess	True	True	tessels0042	cerebellum_suit	True	4	crossed	False	-2	Tue Nov 30 11:16:44 2021
s10	0.35335101253141354	0.4821215089866375	80	0.38536979335363947	0.3846141782589612	lasso_tessels0042_alpha_-2	LASSO	glm7	sc1	sess	True	True	tessels0042	cerebellum_suit	True	4	crossed	False	-2	Tue Nov 30 11:17:00 2021
s12	0.3502012595586934	0.427966442547352	80	0.3874188959750404	0.28528210359969464	lasso_tessels0042_alpha_-2	LASSO	glm7	sc1	sess	True	True	tessels0042	cerebellum_suit	True	4	crossed	False	-2	Tue Nov 30 11:17:18 2021
s14	0.33455385960854483	0.3979426588222984	80	0.362320652393242	0.2610030784107572	lasso_tessels0042_alpha_-2	LASSO	glm7	sc1	sess	True	True	tessels0042	cerebellum_suit	True	4	crossed	False	-2	Tue Nov 30 11:17:36 2021
s15	0.3573224637039063	0.3821900996015041	80	0.3929020667636092	0.18269754644717773	lasso_tessels0042_alpha_-2	LASSO	glm7	sc1	sess	True	True	tessels0042	cerebellum_suit	True	4	crossed	False	-2	Tue Nov 30 11:17:52 2021
s17	0.3521667177229396	0.5601326693027115	80	0.41052622730308536	0.39453964312121226	lasso_tessels0042_alpha_-2	LASSO	glm7	sc1	sess	True	True	tessels0042	cerebellum_suit	True	4	crossed	False	-2	Tue Nov 30 11:18:09 2021
s18	0.2942462806839421	0.29565403341578544	80	0.3158464532642577	0.14780553414499026	lasso_tessels0042_alpha_-2	LASSO	glm7	sc1	sess	True	True	tessels0042	cerebellum_suit	True	4	crossed	False	-2	Tue Nov 30 11:18:22 2021
s19	0.2783293419353353	0.3493476275285698	80	0.30205902474047364	0.2459035477733249	lasso_tessels0042_alpha_-2	LASSO	glm7	sc1	sess	True	True	tessels0042	cerebellum_suit	True	4	crossed	False	-2	Tue Nov 30 11:18:36 2021
s20	0.32311497907279585	0.4435297509927043	80	0.3531131796390373	0.33830181012568794	lasso_tessels0042_alpha_-2	LASSO	glm7	sc1	sess	True	True	tessels0042	cerebellum_suit	True	4	crossed	False	-2	Tue Nov 30 11:18:51 2021
s21	0.3724506394837085	0.3079747932004166	80	0.4108369229028857	0.029673263238481587	lasso_tessels0042_alpha_-2	LASSO	glm7	sc1	sess	True	True	tessels0042	cerebellum_suit	True	4	crossed	False	-2	Tue Nov 30 11:19:06 2021
s22	0.35591107430022617	0.6040268662241711	80	0.41151240034586295	0.4790293487123756	lasso_tessels0042_alpha_-2	LASSO	glm7	sc1	sess	True	True	tessels0042	cerebellum_suit	True	4	crossed	False	-2	Tue Nov 30 11:19:21 2021
s24	0.3511876235950325	0.4310103725586519	80	0.3890981426363864	0.2862015474737481	lasso_tessels0042_alpha_-2	LASSO	glm7	sc1	sess	True	True	tessels0042	cerebellum_suit	True	4	crossed	False	-2	Tue Nov 30 11:19:36 2021
s25	0.35245686339766874	0.3885068875248165	80	0.38976299034678175	0.2152318428266527	lasso_tessels0042_alpha_-2	LASSO	glm7	sc1	sess	True	True	tessels0042	cerebellum_suit	True	4	crossed	False	-2	Tue Nov 30 11:19:50 2021
s26	0.3428830959566884	0.3703174523756744	80	0.3710034241903338	0.2340710559759005	lasso_tessels0042_alpha_-2	LASSO	glm7	sc1	sess	True	True	tessels0042	cerebellum_suit	True	4	crossed	False	-2	Tue Nov 30 11:20:03 2021
s27	0.3307925952058686	0.3942110610534779	80	0.3689019466357242	0.2598858813580465	lasso_tessels0042_alpha_-2	LASSO	glm7	sc1	sess	True	True	tessels0042	cerebellum_suit	True	4	crossed	False	-2	Tue Nov 30 11:20:19 2021
s28	0.3257774870155885	0.3571582525129078	80	0.35022210320217856	0.22862462195165034	lasso_tessels0042_alpha_-2	LASSO	glm7	sc1	sess	True	True	tessels0042	cerebellum_suit	True	4	crossed	False	-2	Tue Nov 30 11:20:34 2021
s29	0.4487108990792157	0.4296582889326178	80	0.5261091735827202	0.1667546042483376	lasso_tessels0042_alpha_-2	LASSO	glm7	sc1	sess	True	True	tessels0042	cerebellum_suit	True	4	crossed	False	-2	Tue Nov 30 11:20:48 2021
s30	0.3812349923253444	0.4613878203253254	80	0.4466412553152652	0.14633861188402442	lasso_tessels0042_alpha_-2	LASSO	glm7	sc1	sess	True	True	tessels0042	cerebellum_suit	True	4	crossed	False	-2	Tue Nov 30 11:21:05 2021
s31	0.3243592066648191	0.3201567015098624	80	0.3574816175123595	0.1165766669083313	lasso_tessels0042_alpha_-2	LASSO	glm7	sc1	sess	True	True	tessels0042	cerebellum_suit	True	4	crossed	False	-2	Tue Nov 30 11:21:19 2021
s02	0.34392635811679884	0.2735977617531525	80	0.37345373328128295	0.2335265303174316	lasso_tessels0042_alpha_-1	LASSO	glm7	sc1	sess	True	True	tessels0042	cerebellum_suit	True	4	crossed	False	-1	Tue Nov 30 11:21:31 2021
s03	0.3886627743357317	0.3613983802840981	80	0.4344382529093891	0.31447659734936284	lasso_tessels0042_alpha_-1	LASSO	glm7	sc1	sess	True	True	tessels0042	cerebellum_suit	True	4	crossed	False	-1	Tue Nov 30 11:21:43 2021
s04	0.3336493101880689	0.20007960442893225	80	0.37284868037228935	0.0912379039880381	lasso_tessels0042_alpha_-1	LASSO	glm7	sc1	sess	True	True	tessels0042	cerebellum_suit	True	4	crossed	False	-1	Tue Nov 30 11:21:58 2021
s06	0.3226317664405999	0.3367899638837895	80	0.3522061220366345	0.29653754551482503	lasso_tessels0042_alpha_-1	LASSO	glm7	sc1	sess	True	True	tessels0042	cerebellum_suit	True	4	crossed	False	-1	Tue Nov 30 11:22:11 2021
s08	0.4211151246023613	0.10576126337652228	80	0.4403065881693172	0.09812127678142632	lasso_tessels0042_alpha_-1	LASSO	glm7	sc1	sess	True	True	tessels0042	cerebellum_suit	True	4	crossed	False	-1	Tue Nov 30 11:22:23 2021
s09	0.33312553429566943	0.29820458844013525	80	0.3605767024942795	0.2800812192017677	lasso_tessels0042_alpha_-1	LASSO	glm7	sc1	sess	True	True	tessels0042	cerebellum_suit	True	4	crossed	False	-1	Tue Nov 30 11:22:37 2021
s10	0.3722914721653015	0.326551672354282	80	0.3987443508396549	0.3019062852784293	lasso_tessels0042_alpha_-1	LASSO	glm7	sc1	sess	True	True	tessels0042	cerebellum_suit	True	4	crossed	False	-1	Tue Nov 30 11:22:49 2021
s12	0.3671768684124369	0.22775098032995866	80	0.3964542347440987	0.20490289853529853	lasso_tessels0042_alpha_-1	LASSO	glm7	sc1	sess	True	True	tessels0042	cerebellum_suit	True	4	crossed	False	-1	Tue Nov 30 11:23:02 2021
s14	0.3497623201840677	0.15679193861748453	80	0.3718552714939266	0.13984497767608353	lasso_tessels0042_alpha_-1	LASSO	glm7	sc1	sess	True	True	tessels0042	cerebellum_suit	True	4	crossed	False	-1	Tue Nov 30 11:23:16 2021
s15	0.3714550485312932	0.12065237875106508	80	0.3970345556432338	0.11109542705269156	lasso_tessels0042_alpha_-1	LASSO	glm7	sc1	sess	True	True	tessels0042	cerebellum_suit	True	4	crossed	False	-1	Tue Nov 30 11:23:29 2021
s17	0.3849108112103698	0.35547490876537724	80	0.4275762592630019	0.2860045373997982	lasso_tessels0042_alpha_-1	LASSO	glm7	sc1	sess	True	True	tessels0042	cerebellum_suit	True	4	crossed	False	-1	Tue Nov 30 11:23:43 2021
s18	0.2999031963333716	0.10913084874414793	80	0.3184385985031604	0.09063185111193613	lasso_tessels0042_alpha_-1	LASSO	glm7	sc1	sess	True	True	tessels0042	cerebellum_suit	True	4	crossed	False	-1	Tue Nov 30 11:23:55 2021
s19	0.28596640710577986	0.14050329319082724	80	0.3089651982346167	0.11845707170443386	lasso_tessels0042_alpha_-1	LASSO	glm7	sc1	sess	True	True	tessels0042	cerebellum_suit	True	4	crossed	False	-1	Tue Nov 30 11:24:08 2021
s20	0.3418979484663949	0.2175464122604808	80	0.3681552771665846	0.2000707198167934	lasso_tessels0042_alpha_-1	LASSO	glm7	sc1	sess	True	True	tessels0042	cerebellum_suit	True	4	crossed	False	-1	Tue Nov 30 11:24:20 2021
s21	0.3808278152336057	0.07755338798871021	80	0.4057575189882564	0.04105628697013343	lasso_tessels0042_alpha_-1	LASSO	glm7	sc1	sess	True	True	tessels0042	cerebellum_suit	True	4	crossed	False	-1	Tue Nov 30 11:24:34 2021
s22	0.3853927799817888	0.4598595937228979	80	0.4258923129030241	0.42084829927443096	lasso_tessels0042_alpha_-1	LASSO	glm7	sc1	sess	True	True	tessels0042	cerebellum_suit	True	4	crossed	False	-1	Tue Nov 30 11:24:47 2021
s24	0.3703130243894818	0.20966654288279016	80	0.3993824526320052	0.17442176807100582	lasso_tessels0042_alpha_-1	LASSO	glm7	sc1	sess	True	True	tessels0042	cerebellum_suit	True	4	crossed	False	-1	Tue Nov 30 11:25:00 2021
s25	0.3658255159333335	0.19333134527209966	80	0.3928635503025649	0.1762867416964774	lasso_tessels0042_alpha_-1	LASSO	glm7	sc1	sess	True	True	tessels0042	cerebellum_suit	True	4	crossed	False	-1	Tue Nov 30 11:25:12 2021
s26	0.3550750393892823	0.16653459433899426	80	0.3778141630390193	0.1525813487300039	lasso_tessels0042_alpha_-1	LASSO	glm7	sc1	sess	True	True	tessels0042	cerebellum_suit	True	4	crossed	False	-1	Tue Nov 30 11:25:24 2021
s27	0.3443908155309078	0.2065900140195297	80	0.3752530463480469	0.185909348699752	lasso_tessels0042_alpha_-1	LASSO	glm7	sc1	sess	True	True	tessels0042	cerebellum_suit	True	4	crossed	False	-1	Tue Nov 30 11:25:37 2021
s28	0.33650182888978303	0.1437788117746961	80	0.3554192705041923	0.11944197492442195	lasso_tessels0042_alpha_-1	LASSO	glm7	sc1	sess	True	True	tessels0042	cerebellum_suit	True	4	crossed	False	-1	Tue Nov 30 11:25:51 2021
s29	0.4705587889928304	0.2023889401342238	80	0.5231704488522082	0.15349476293187644	lasso_tessels0042_alpha_-1	LASSO	glm7	sc1	sess	True	True	tessels0042	cerebellum_suit	True	4	crossed	False	-1	Tue Nov 30 11:26:04 2021
s30	0.4054373321082008	0.17291746217698015	80	0.446072878813332	0.09146286068078954	lasso_tessels0042_alpha_-1	LASSO	glm7	sc1	sess	True	True	tessels0042	cerebellum_suit	True	4	crossed	False	-1	Tue Nov 30 11:26:18 2021
s31	0.3316736916576652	0.11081969535503564	80	0.3561488570118878	0.07186313061522276	lasso_tessels0042_alpha_-1	LASSO	glm7	sc1	sess	True	True	tessels0042	cerebellum_suit	True	4	crossed	False	-1	Tue Nov 30 11:26:32 2021
s02	0.1611646819487859	0.9151009978884268	1190	0.3771285068932341	0.3948973778116877	lasso_tessels0642_alpha_-4	LASSO	glm7	sc1	sess	True	True	tessels0642	cerebellum_suit	True	4	crossed	False	-4	Mon Nov 29 21:28:53 2021
s03	0.17207386700901495	0.9316110291406492	1190	0.4363206101805329	0.4602455263649857	lasso_tessels0642_alpha_-4	LASSO	glm7	sc1	sess	True	True	tessels0642	cerebellum_suit	True	4	crossed	False	-4	Mon Nov 29 21:39:02 2021
s04	0.14754620217034847	0.9270093016259426	1190	0.3912862929031706	0.2846514715100168	lasso_tessels0642_alpha_-4	LASSO	glm7	sc1	sess	True	True	tessels0642	cerebellum_suit	True	4	crossed	False	-4	Mon Nov 29 21:48:10 2021
s06	0.14933497835427395	0.9196888619667948	1190	0.3600854797430725	0.4271589962521604	lasso_tessels0642_alpha_-4	LASSO	glm7	sc1	sess	True	True	tessels0642	cerebellum_suit	True	4	crossed	False	-4	Mon Nov 29 21:56:09 2021
s08	0.19595328965382924	0.9098483202772076	1190	0.5301054725093921	0.11909404749708935	lasso_tessels0642_alpha_-4	LASSO	glm7	sc1	sess	True	True	tessels0642	cerebellum_suit	True	4	crossed	False	-4	Mon Nov 29 22:07:45 2021
s09	0.16759450506890616	0.90219182078221	1190	0.3816550626156939	0.3455838614624667	lasso_tessels0642_alpha_-4	LASSO	glm7	sc1	sess	True	True	tessels0642	cerebellum_suit	True	4	crossed	False	-4	Mon Nov 29 22:18:16 2021
s10	0.17328801014108838	0.9174410155387984	1190	0.4313516931764753	0.3693370910563628	lasso_tessels0642_alpha_-4	LASSO	glm7	sc1	sess	True	True	tessels0642	cerebellum_suit	True	4	crossed	False	-4	Mon Nov 29 22:28:19 2021
s12	0.16473163174030575	0.9227969630535976	1190	0.4365922058965284	0.274082037721586	lasso_tessels0642_alpha_-4	LASSO	glm7	sc1	sess	True	True	tessels0642	cerebellum_suit	True	4	crossed	False	-4	Mon Nov 29 22:37:04 2021
s14	0.17829645684392406	0.8904307842362136	1190	0.415782358002924	0.2225404970970693	lasso_tessels0642_alpha_-4	LASSO	glm7	sc1	sess	True	True	tessels0642	cerebellum_suit	True	4	crossed	False	-4	Mon Nov 29 22:47:30 2021
s15	0.1635466120269334	0.9220135040917682	1190	0.4369423414721808	0.24761090970591504	lasso_tessels0642_alpha_-4	LASSO	glm7	sc1	sess	True	True	tessels0642	cerebellum_suit	True	4	crossed	False	-4	Mon Nov 29 22:57:13 2021
s17	0.1692040994019139	0.9288638248991908	1190	0.4358361957381504	0.42345016548749603	lasso_tessels0642_alpha_-4	LASSO	glm7	sc1	sess	True	True	tessels0642	cerebellum_suit	True	4	crossed	False	-4	Mon Nov 29 23:06:45 2021
s18	0.1427642626656824	0.9087933913334818	1190	0.3463520724625789	0.21969697634256072	lasso_tessels0642_alpha_-4	LASSO	glm7	sc1	sess	True	True	tessels0642	cerebellum_suit	True	4	crossed	False	-4	Mon Nov 29 23:13:49 2021
s19	0.1602879965282502	0.8681792636365896	1190	0.3233836076547022	0.31168679384021525	lasso_tessels0642_alpha_-4	LASSO	glm7	sc1	sess	True	True	tessels0642	cerebellum_suit	True	4	crossed	False	-4	Mon Nov 29 23:21:38 2021
s20	0.16983312714949791	0.9003400393136345	1190	0.3920473117348385	0.3176825659280049	lasso_tessels0642_alpha_-4	LASSO	glm7	sc1	sess	True	True	tessels0642	cerebellum_suit	True	4	crossed	False	-4	Mon Nov 29 23:31:50 2021
s21	0.16359024858742074	0.9279602139028996	1190	0.4993020012792173	0.030235102097957788	lasso_tessels0642_alpha_-4	LASSO	glm7	sc1	sess	True	True	tessels0642	cerebellum_suit	True	4	crossed	False	-4	Mon Nov 29 23:41:27 2021
s22	0.16133751882551786	0.9429667321506501	1190	0.4590524585465588	0.4433704644012042	lasso_tessels0642_alpha_-4	LASSO	glm7	sc1	sess	True	True	tessels0642	cerebellum_suit	True	4	crossed	False	-4	Mon Nov 29 23:50:31 2021
s24	0.1674110280458077	0.9202595138428764	1190	0.463697566371122	0.2054766133234635	lasso_tessels0642_alpha_-4	LASSO	glm7	sc1	sess	True	True	tessels0642	cerebellum_suit	True	4	crossed	False	-4	Tue Nov 30 00:00:50 2021
s25	0.16025028199377034	0.9255667891907692	1190	0.44011827722758223	0.2157554228735235	lasso_tessels0642_alpha_-4	LASSO	glm7	sc1	sess	True	True	tessels0642	cerebellum_suit	True	4	crossed	False	-4	Tue Nov 30 00:09:55 2021
s26	0.1747412556307521	0.9002594723757851	1190	0.4077852700292568	0.2705008388771413	lasso_tessels0642_alpha_-4	LASSO	glm7	sc1	sess	True	True	tessels0642	cerebellum_suit	True	4	crossed	False	-4	Tue Nov 30 00:19:21 2021
s27	0.15894561542504584	0.9175915168560568	1190	0.4240627425692805	0.2454925833410861	lasso_tessels0642_alpha_-4	LASSO	glm7	sc1	sess	True	True	tessels0642	cerebellum_suit	True	4	crossed	False	-4	Tue Nov 30 00:30:17 2021
s28	0.16378803247009655	0.903915658804685	1190	0.39781823170396796	0.2250498776829813	lasso_tessels0642_alpha_-4	LASSO	glm7	sc1	sess	True	True	tessels0642	cerebellum_suit	True	4	crossed	False	-4	Tue Nov 30 00:38:34 2021
s29	0.1833203176960984	0.94505759661385	1190	0.6021528394014884	0.1908138359586829	lasso_tessels0642_alpha_-4	LASSO	glm7	sc1	sess	True	True	tessels0642	cerebellum_suit	True	4	crossed	False	-4	Tue Nov 30 00:51:37 2021
s30	0.15893166099744854	0.9422190539725877	1190	0.5268983192113255	0.1214752226569924	lasso_tessels0642_alpha_-4	LASSO	glm7	sc1	sess	True	True	tessels0642	cerebellum_suit	True	4	crossed	False	-4	Tue Nov 30 01:00:59 2021
s31	0.15581454101959236	0.9155997634610219	1190	0.4171681540280293	0.15429614356073598	lasso_tessels0642_alpha_-4	LASSO	glm7	sc1	sess	True	True	tessels0642	cerebellum_suit	True	4	crossed	False	-4	Tue Nov 30 01:08:32 2021
s02	0.23376956235549598	0.8054601225370429	1190	0.3548052813213134	0.4191897246157552	lasso_tessels0642_alpha_-3	LASSO	glm7	sc1	sess	True	True	tessels0642	cerebellum_suit	True	4	crossed	False	-3	Tue Nov 30 01:11:56 2021
s03	0.2540977311053593	0.8376253874429835	1190	0.4162616991505665	0.4692580490091151	lasso_tessels0642_alpha_-3	LASSO	glm7	sc1	sess	True	True	tessels0642	cerebellum_suit	True	4	crossed	False	-3	Tue Nov 30 01:16:00 2021
s04	0.22272328522720536	0.8210889701280979	1190	0.3684349205797473	0.30229504857423783	lasso_tessels0642_alpha_-3	LASSO	glm7	sc1	sess	True	True	tessels0642	cerebellum_suit	True	4	crossed	False	-3	Tue Nov 30 01:20:02 2021
s06	0.21558075482208933	0.8213830996739335	1190	0.3392781237726872	0.4439499760908409	lasso_tessels0642_alpha_-3	LASSO	glm7	sc1	sess	True	True	tessels0642	cerebellum_suit	True	4	crossed	False	-3	Tue Nov 30 01:23:43 2021
s08	0.2913608042228303	0.7828860407718216	1190	0.4800957167181172	0.14704169569247952	lasso_tessels0642_alpha_-3	LASSO	glm7	sc1	sess	True	True	tessels0642	cerebellum_suit	True	4	crossed	False	-3	Tue Nov 30 01:27:57 2021
s09	0.24132926019538786	0.7713568624831746	1190	0.3540756110230571	0.3815379477187221	lasso_tessels0642_alpha_-3	LASSO	glm7	sc1	sess	True	True	tessels0642	cerebellum_suit	True	4	crossed	False	-3	Tue Nov 30 01:32:01 2021
s10	0.2532688327627429	0.8077236805965023	1190	0.3956128661986353	0.4067129304306107	lasso_tessels0642_alpha_-3	LASSO	glm7	sc1	sess	True	True	tessels0642	cerebellum_suit	True	4	crossed	False	-3	Tue Nov 30 01:36:10 2021
s12	0.24721275797915626	0.8097078363669851	1190	0.4041776032644368	0.3003945059968509	lasso_tessels0642_alpha_-3	LASSO	glm7	sc1	sess	True	True	tessels0642	cerebellum_suit	True	4	crossed	False	-3	Tue Nov 30 01:39:55 2021
s14	0.25426433810604565	0.7510381746564591	1190	0.3816977297084909	0.2530913763575797	lasso_tessels0642_alpha_-3	LASSO	glm7	sc1	sess	True	True	tessels0642	cerebellum_suit	True	4	crossed	False	-3	Tue Nov 30 01:44:21 2021
s15	0.2466241179889857	0.8107415493755281	1190	0.4083301285597033	0.2547144132346608	lasso_tessels0642_alpha_-3	LASSO	glm7	sc1	sess	True	True	tessels0642	cerebellum_suit	True	4	crossed	False	-3	Tue Nov 30 01:48:41 2021
s17	0.2458601197945622	0.839061901751728	1190	0.4110514273467253	0.4434434787896209	lasso_tessels0642_alpha_-3	LASSO	glm7	sc1	sess	True	True	tessels0642	cerebellum_suit	True	4	crossed	False	-3	Tue Nov 30 01:53:08 2021
s18	0.21375981844626002	0.7799855696459813	1190	0.32418687755191444	0.2259835277555326	lasso_tessels0642_alpha_-3	LASSO	glm7	sc1	sess	True	True	tessels0642	cerebellum_suit	True	4	crossed	False	-3	Tue Nov 30 01:56:09 2021
s19	0.2207184911739528	0.7158360660977552	1190	0.3012882220291206	0.3302707741900541	lasso_tessels0642_alpha_-3	LASSO	glm7	sc1	sess	True	True	tessels0642	cerebellum_suit	True	4	crossed	False	-3	Tue Nov 30 01:59:21 2021
s20	0.2423150097130588	0.7748548805975434	1190	0.36367743917360135	0.3497606282349187	lasso_tessels0642_alpha_-3	LASSO	glm7	sc1	sess	True	True	tessels0642	cerebellum_suit	True	4	crossed	False	-3	Tue Nov 30 02:03:26 2021
s21	0.2538637411137897	0.816140528138568	1190	0.4634420574175819	0.029406848437485537	lasso_tessels0642_alpha_-3	LASSO	glm7	sc1	sess	True	True	tessels0642	cerebellum_suit	True	4	crossed	False	-3	Tue Nov 30 02:07:23 2021
s22	0.24324565401027465	0.8603909725917409	1190	0.4302297383070985	0.4707147989196906	lasso_tessels0642_alpha_-3	LASSO	glm7	sc1	sess	True	True	tessels0642	cerebellum_suit	True	4	crossed	False	-3	Tue Nov 30 02:11:25 2021
s24	0.2524187361472421	0.8000519870906682	1190	0.4241840619386448	0.2360124648040937	lasso_tessels0642_alpha_-3	LASSO	glm7	sc1	sess	True	True	tessels0642	cerebellum_suit	True	4	crossed	False	-3	Tue Nov 30 02:15:34 2021
s25	0.2430529006252117	0.817184467546797	1190	0.41369572940072336	0.22436885208274748	lasso_tessels0642_alpha_-3	LASSO	glm7	sc1	sess	True	True	tessels0642	cerebellum_suit	True	4	crossed	False	-3	Tue Nov 30 02:19:14 2021
s26	0.2519272456205934	0.771817489728162	1190	0.378401121920917	0.289015848090281	lasso_tessels0642_alpha_-3	LASSO	glm7	sc1	sess	True	True	tessels0642	cerebellum_suit	True	4	crossed	False	-3	Tue Nov 30 02:22:56 2021
s27	0.23839206409777136	0.7969842137114262	1190	0.3934505942302315	0.26472300591134146	lasso_tessels0642_alpha_-3	LASSO	glm7	sc1	sess	True	True	tessels0642	cerebellum_suit	True	4	crossed	False	-3	Tue Nov 30 02:27:19 2021
s28	0.2430012043969314	0.7638316661694544	1190	0.3660349639026558	0.2513087473809305	lasso_tessels0642_alpha_-3	LASSO	glm7	sc1	sess	True	True	tessels0642	cerebellum_suit	True	4	crossed	False	-3	Tue Nov 30 02:30:41 2021
s29	0.2883847279397165	0.8555699285309408	1190	0.5697795863578118	0.18376160060150007	lasso_tessels0642_alpha_-3	LASSO	glm7	sc1	sess	True	True	tessels0642	cerebellum_suit	True	4	crossed	False	-3	Tue Nov 30 02:35:21 2021
s30	0.2486059704269111	0.8504404444895525	1190	0.4878087345854032	0.14254393003288626	lasso_tessels0642_alpha_-3	LASSO	glm7	sc1	sess	True	True	tessels0642	cerebellum_suit	True	4	crossed	False	-3	Tue Nov 30 02:39:38 2021
s31	0.2358538837680989	0.7851924015950751	1190	0.3828754063449121	0.159210847311793	lasso_tessels0642_alpha_-3	LASSO	glm7	sc1	sess	True	True	tessels0642	cerebellum_suit	True	4	crossed	False	-3	Tue Nov 30 02:42:51 2021
s02	0.17835476388538848	0.8916046239952552	670	0.3744069300744815	0.4023761722037987	lasso_tessels0362_alpha_-4	LASSO	glm7	sc1	sess	True	True	tessels0362	cerebellum_suit	True	4	crossed	False	-4	Mon Nov 29 18:17:14 2021
s03	0.19146991686147624	0.9122951282553964	670	0.4380446488544999	0.4602494908077925	lasso_tessels0362_alpha_-4	LASSO	glm7	sc1	sess	True	True	tessels0362	cerebellum_suit	True	4	crossed	False	-4	Mon Nov 29 18:23:06 2021
s04	0.16627620273559218	0.904194174824948	670	0.3989215110843575	0.26493890026447564	lasso_tessels0362_alpha_-4	LASSO	glm7	sc1	sess	True	True	tessels0362	cerebellum_suit	True	4	crossed	False	-4	Mon Nov 29 18:28:49 2021
s06	0.166302943811401	0.8964660357108178	670	0.35970240534400666	0.4315265108823439	lasso_tessels0362_alpha_-4	LASSO	glm7	sc1	sess	True	True	tessels0362	cerebellum_suit	True	4	crossed	False	-4	Mon Nov 29 18:33:22 2021
s08	0.22199944837930585	0.8793212510292735	670	0.5251696901163113	0.12915907209011435	lasso_tessels0362_alpha_-4	LASSO	glm7	sc1	sess	True	True	tessels0362	cerebellum_suit	True	4	crossed	False	-4	Mon Nov 29 18:40:43 2021
s09	0.18773616406869006	0.8709261504958246	670	0.37262644224131	0.3708899261585375	lasso_tessels0362_alpha_-4	LASSO	glm7	sc1	sess	True	True	tessels0362	cerebellum_suit	True	4	crossed	False	-4	Mon Nov 29 18:46:51 2021
s10	0.19505354683020595	0.8905863511068446	670	0.42784728676974937	0.3833314611419713	lasso_tessels0362_alpha_-4	LASSO	glm7	sc1	sess	True	True	tessels0362	cerebellum_suit	True	4	crossed	False	-4	Mon Nov 29 18:52:45 2021
s12	0.18655764802397115	0.8961339342297628	670	0.4347839673840157	0.28069835352186234	lasso_tessels0362_alpha_-4	LASSO	glm7	sc1	sess	True	True	tessels0362	cerebellum_suit	True	4	crossed	False	-4	Mon Nov 29 18:57:58 2021
s14	0.1954140877784097	0.8631900787390473	670	0.4087975873162075	0.2384835647086745	lasso_tessels0362_alpha_-4	LASSO	glm7	sc1	sess	True	True	tessels0362	cerebellum_suit	True	4	crossed	False	-4	Mon Nov 29 19:04:05 2021
s15	0.18328264915412806	0.8981985390818692	670	0.43829124503707817	0.24769481237981664	lasso_tessels0362_alpha_-4	LASSO	glm7	sc1	sess	True	True	tessels0362	cerebellum_suit	True	4	crossed	False	-4	Mon Nov 29 19:09:53 2021
s17	0.19063977567932194	0.9057970207334204	670	0.4395651256324532	0.4182064028716794	lasso_tessels0362_alpha_-4	LASSO	glm7	sc1	sess	True	True	tessels0362	cerebellum_suit	True	4	crossed	False	-4	Mon Nov 29 19:15:16 2021
s18	0.1585783602935707	0.8826106079598772	670	0.3473850174744707	0.22385873986342456	lasso_tessels0362_alpha_-4	LASSO	glm7	sc1	sess	True	True	tessels0362	cerebellum_suit	True	4	crossed	False	-4	Mon Nov 29 19:19:22 2021
s19	0.17529637069521095	0.8331868438834646	670	0.3167704256905084	0.33560078298981605	lasso_tessels0362_alpha_-4	LASSO	glm7	sc1	sess	True	True	tessels0362	cerebellum_suit	True	4	crossed	False	-4	Mon Nov 29 19:23:48 2021
s20	0.1904840459213139	0.8673384186733887	670	0.38325153853168864	0.3419586165146511	lasso_tessels0362_alpha_-4	LASSO	glm7	sc1	sess	True	True	tessels0362	cerebellum_suit	True	4	crossed	False	-4	Mon Nov 29 19:29:52 2021
s21	0.18143622829791886	0.907907099187556	670	0.4942826840224139	0.03982021973078456	lasso_tessels0362_alpha_-4	LASSO	glm7	sc1	sess	True	True	tessels0362	cerebellum_suit	True	4	crossed	False	-4	Mon Nov 29 19:35:28 2021
s22	0.18097926645204124	0.9254722443179954	670	0.4542716734251181	0.4521536949911197	lasso_tessels0362_alpha_-4	LASSO	glm7	sc1	sess	True	True	tessels0362	cerebellum_suit	True	4	crossed	False	-4	Mon Nov 29 19:40:31 2021
s24	0.18900280528458505	0.8938562732358533	670	0.4589978438835623	0.22118061983846807	lasso_tessels0362_alpha_-4	LASSO	glm7	sc1	sess	True	True	tessels0362	cerebellum_suit	True	4	crossed	False	-4	Mon Nov 29 19:46:43 2021
s25	0.18053495384396206	0.9014217364615088	670	0.43529800205091895	0.2200679489508645	lasso_tessels0362_alpha_-4	LASSO	glm7	sc1	sess	True	True	tessels0362	cerebellum_suit	True	4	crossed	False	-4	Mon Nov 29 19:52:01 2021
s26	0.19227888942370225	0.8740312924423896	670	0.3984465314338577	0.2943969859908967	lasso_tessels0362_alpha_-4	LASSO	glm7	sc1	sess	True	True	tessels0362	cerebellum_suit	True	4	crossed	False	-4	Mon Nov 29 19:57:21 2021
s27	0.1787179559521539	0.8909318215500771	670	0.4188271746511502	0.25694540851559744	lasso_tessels0362_alpha_-4	LASSO	glm7	sc1	sess	True	True	tessels0362	cerebellum_suit	True	4	crossed	False	-4	Mon Nov 29 20:03:53 2021
s28	0.18508255005063687	0.8701841463840759	670	0.3997105538878241	0.21706197285450013	lasso_tessels0362_alpha_-4	LASSO	glm7	sc1	sess	True	True	tessels0362	cerebellum_suit	True	4	crossed	False	-4	Mon Nov 29 20:08:42 2021
s29	0.209761276099643	0.9255685666190056	670	0.6043478474002356	0.1924041153578621	lasso_tessels0362_alpha_-4	LASSO	glm7	sc1	sess	True	True	tessels0362	cerebellum_suit	True	4	crossed	False	-4	Mon Nov 29 20:17:01 2021
s30	0.17812420289818715	0.9247767193224504	670	0.5255697663156268	0.1283057868668954	lasso_tessels0362_alpha_-4	LASSO	glm7	sc1	sess	True	True	tessels0362	cerebellum_suit	True	4	crossed	False	-4	Mon Nov 29 20:22:24 2021
s31	0.17345808994932976	0.8904387669956458	670	0.4141081895475392	0.16486074668036438	lasso_tessels0362_alpha_-4	LASSO	glm7	sc1	sess	True	True	tessels0362	cerebellum_suit	True	4	crossed	False	-4	Mon Nov 29 20:26:46 2021
s02	0.24506620918276706	0.7775133184938091	670	0.3531132891785284	0.4227382066482346	lasso_tessels0362_alpha_-3	LASSO	glm7	sc1	sess	True	True	tessels0362	cerebellum_suit	True	4	crossed	False	-3	Mon Nov 29 20:28:43 2021
s03	0.2693813338135194	0.8084236055152813	670	0.4166583926358411	0.4686131295478903	lasso_tessels0362_alpha_-3	LASSO	glm7	sc1	sess	True	True	tessels0362	cerebellum_suit	True	4	crossed	False	-3	Mon Nov 29 20:31:03 2021
s04	0.2392788646301465	0.7815583774073758	670	0.3715508068438863	0.2829088453353724	lasso_tessels0362_alpha_-3	LASSO	glm7	sc1	sess	True	True	tessels0362	cerebellum_suit	True	4	crossed	False	-3	Mon Nov 29 20:33:26 2021
s06	0.22720745125291905	0.7918763812111058	670	0.3371514219113552	0.4504133248603917	lasso_tessels0362_alpha_-3	LASSO	glm7	sc1	sess	True	True	tessels0362	cerebellum_suit	True	4	crossed	False	-3	Mon Nov 29 20:35:32 2021
s08	0.31322341222105843	0.7320350504912804	670	0.4725067358695996	0.15641429017625208	lasso_tessels0362_alpha_-3	LASSO	glm7	sc1	sess	True	True	tessels0362	cerebellum_suit	True	4	crossed	False	-3	Mon Nov 29 20:37:57 2021
s09	0.2539303497417975	0.7329330196684124	670	0.3481323965846049	0.4007563011233215	lasso_tessels0362_alpha_-3	LASSO	glm7	sc1	sess	True	True	tessels0362	cerebellum_suit	True	4	crossed	False	-3	Mon Nov 29 20:40:16 2021
s10	0.2681553082497005	0.773402272413782	670	0.3927356287298847	0.4157392324877043	lasso_tessels0362_alpha_-3	LASSO	glm7	sc1	sess	True	True	tessels0362	cerebellum_suit	True	4	crossed	False	-3	Mon Nov 29 20:42:39 2021
s12	0.2637301430962524	0.7695408155414807	670	0.4013339382891295	0.3067796514122893	lasso_tessels0362_alpha_-3	LASSO	glm7	sc1	sess	True	True	tessels0362	cerebellum_suit	True	4	crossed	False	-3	Mon Nov 29 20:44:49 2021
s14	0.2654986592751009	0.7155667387684235	670	0.3764272355260005	0.2659509269024497	lasso_tessels0362_alpha_-3	LASSO	glm7	sc1	sess	True	True	tessels0362	cerebellum_suit	True	4	crossed	False	-3	Mon Nov 29 20:47:22 2021
s15	0.2628623679055676	0.7723189250096872	670	0.4078928610811334	0.2485703861852677	lasso_tessels0362_alpha_-3	LASSO	glm7	sc1	sess	True	True	tessels0362	cerebellum_suit	True	4	crossed	False	-3	Mon Nov 29 20:49:51 2021
s17	0.2611836827068769	0.8088513444926608	670	0.4123438535754508	0.4400520563097389	lasso_tessels0362_alpha_-3	LASSO	glm7	sc1	sess	True	True	tessels0362	cerebellum_suit	True	4	crossed	False	-3	Mon Nov 29 20:52:19 2021
s18	0.22581052754003564	0.7386351425192601	670	0.3233739004006766	0.22801602297335505	lasso_tessels0362_alpha_-3	LASSO	glm7	sc1	sess	True	True	tessels0362	cerebellum_suit	True	4	crossed	False	-3	Mon Nov 29 20:54:04 2021
s19	0.22830845486485904	0.6829572917086651	670	0.2979263696780294	0.34485556203446965	lasso_tessels0362_alpha_-3	LASSO	glm7	sc1	sess	True	True	tessels0362	cerebellum_suit	True	4	crossed	False	-3	Mon Nov 29 20:55:54 2021
s20	0.2542585811131166	0.7386458667898883	670	0.3561136011200874	0.3737976781143622	lasso_tessels0362_alpha_-3	LASSO	glm7	sc1	sess	True	True	tessels0362	cerebellum_suit	True	4	crossed	False	-3	Mon Nov 29 20:58:12 2021
s21	0.2689409420579198	0.7829024071139161	670	0.455902789499653	0.041275988637061264	lasso_tessels0362_alpha_-3	LASSO	glm7	sc1	sess	True	True	tessels0362	cerebellum_suit	True	4	crossed	False	-3	Mon Nov 29 21:00:28 2021
s22	0.2582826263657089	0.8359000451672416	670	0.4266189987739897	0.4772974457208126	lasso_tessels0362_alpha_-3	LASSO	glm7	sc1	sess	True	True	tessels0362	cerebellum_suit	True	4	crossed	False	-3	Mon Nov 29 21:02:44 2021
s24	0.2700659825158596	0.7545747988887666	670	0.4160368846221656	0.25517265174903986	lasso_tessels0362_alpha_-3	LASSO	glm7	sc1	sess	True	True	tessels0362	cerebellum_suit	True	4	crossed	False	-3	Mon Nov 29 21:05:06 2021
s25	0.2594430384925627	0.7792180289930989	670	0.4095996786728863	0.2284245117475157	lasso_tessels0362_alpha_-3	LASSO	glm7	sc1	sess	True	True	tessels0362	cerebellum_suit	True	4	crossed	False	-3	Mon Nov 29 21:07:11 2021
s26	0.2636107854547877	0.7385474472268537	670	0.3735797628820121	0.303686755935197	lasso_tessels0362_alpha_-3	LASSO	glm7	sc1	sess	True	True	tessels0362	cerebellum_suit	True	4	crossed	False	-3	Mon Nov 29 21:09:17 2021
s27	0.2535762329480948	0.7555185504660952	670	0.3892859390867947	0.26939988508313834	lasso_tessels0362_alpha_-3	LASSO	glm7	sc1	sess	True	True	tessels0362	cerebellum_suit	True	4	crossed	False	-3	Mon Nov 29 21:11:47 2021
s28	0.2568714866941049	0.7190601536611371	670	0.3650580635915097	0.2509672095587336	lasso_tessels0362_alpha_-3	LASSO	glm7	sc1	sess	True	True	tessels0362	cerebellum_suit	True	4	crossed	False	-3	Mon Nov 29 21:13:43 2021
s29	0.3145172277594151	0.8162142025489583	670	0.5689819120299984	0.18461624136397006	lasso_tessels0362_alpha_-3	LASSO	glm7	sc1	sess	True	True	tessels0362	cerebellum_suit	True	4	crossed	False	-3	Mon Nov 29 21:16:29 2021
s30	0.26551895281602217	0.8209373805389799	670	0.4873555135609461	0.1409310320089518	lasso_tessels0362_alpha_-3	LASSO	glm7	sc1	sess	True	True	tessels0362	cerebellum_suit	True	4	crossed	False	-3	Mon Nov 29 21:18:57 2021
s31	0.24894045395168315	0.7462331659860328	670	0.37827974913266105	0.17218088124892847	lasso_tessels0362_alpha_-3	LASSO	glm7	sc1	sess	True	True	tessels0362	cerebellum_suit	True	4	crossed	False	-3	Mon Nov 29 21:20:48 2021
s02	0.20260076792390014	0.8523342189751559	304	0.3712739773514271	0.4020262473689347	lasso_tessels0162_alpha_-4	LASSO	glm7	sc1	sess	True	True	tessels0162	cerebellum_suit	True	4	crossed	False	-4	Mon Nov 29 16:33:37 2021
s03	0.21866830656311487	0.879291209926472	304	0.44121725144903057	0.44757780349098064	lasso_tessels0162_alpha_-4	LASSO	glm7	sc1	sess	True	True	tessels0162	cerebellum_suit	True	4	crossed	False	-4	Mon Nov 29 16:36:24 2021
s04	0.1918047236352263	0.8651508121879492	304	0.4007955801390973	0.2480000639458613	lasso_tessels0162_alpha_-4	LASSO	glm7	sc1	sess	True	True	tessels0162	cerebellum_suit	True	4	crossed	False	-4	Mon Nov 29 16:39:09 2021
s06	0.1884820695031492	0.8600117240265038	304	0.3600964742625561	0.4223455743629228	lasso_tessels0162_alpha_-4	LASSO	glm7	sc1	sess	True	True	tessels0162	cerebellum_suit	True	4	crossed	False	-4	Mon Nov 29 16:41:08 2021
s08	0.2546257029949966	0.8313589334730503	304	0.5117751931217751	0.1390135146721273	lasso_tessels0162_alpha_-4	LASSO	glm7	sc1	sess	True	True	tessels0162	cerebellum_suit	True	4	crossed	False	-4	Mon Nov 29 16:44:39 2021
s09	0.2141421471015584	0.8189787592805902	304	0.3659907103050121	0.3836610449543919	lasso_tessels0162_alpha_-4	LASSO	glm7	sc1	sess	True	True	tessels0162	cerebellum_suit	True	4	crossed	False	-4	Mon Nov 29 16:47:27 2021
s10	0.22258957862736936	0.8497759782881925	304	0.41768666658917175	0.3924276473323132	lasso_tessels0162_alpha_-4	LASSO	glm7	sc1	sess	True	True	tessels0162	cerebellum_suit	True	4	crossed	False	-4	Mon Nov 29 16:50:16 2021
s12	0.2174654148724947	0.84774207341511	304	0.4297226247463988	0.292863735123468	lasso_tessels0162_alpha_-4	LASSO	glm7	sc1	sess	True	True	tessels0162	cerebellum_suit	True	4	crossed	False	-4	Mon Nov 29 16:52:38 2021
s14	0.22116497021348447	0.8129856614185953	304	0.40388956110786894	0.23905175207686635	lasso_tessels0162_alpha_-4	LASSO	glm7	sc1	sess	True	True	tessels0162	cerebellum_suit	True	4	crossed	False	-4	Mon Nov 29 16:55:23 2021
s15	0.2101277410580429	0.8580890860336925	304	0.4384969732064641	0.2375995110713124	lasso_tessels0162_alpha_-4	LASSO	glm7	sc1	sess	True	True	tessels0162	cerebellum_suit	True	4	crossed	False	-4	Mon Nov 29 16:57:58 2021
s17	0.2164784793277236	0.8714565733475267	304	0.4409662157653299	0.4141023779194855	lasso_tessels0162_alpha_-4	LASSO	glm7	sc1	sess	True	True	tessels0162	cerebellum_suit	True	4	crossed	False	-4	Mon Nov 29 17:00:19 2021
s18	0.17826482291904389	0.8431503768069355	304	0.33967321828297203	0.2370201869660295	lasso_tessels0162_alpha_-4	LASSO	glm7	sc1	sess	True	True	tessels0162	cerebellum_suit	True	4	crossed	False	-4	Mon Nov 29 17:02:13 2021
s19	0.1934568884998071	0.7838806225367851	304	0.31456844382437044	0.3314020273610125	lasso_tessels0162_alpha_-4	LASSO	glm7	sc1	sess	True	True	tessels0162	cerebellum_suit	True	4	crossed	False	-4	Mon Nov 29 17:04:10 2021
s20	0.21368029131338148	0.8220646223614778	304	0.3743191382945607	0.3624514915047912	lasso_tessels0162_alpha_-4	LASSO	glm7	sc1	sess	True	True	tessels0162	cerebellum_suit	True	4	crossed	False	-4	Mon Nov 29 17:06:56 2021
s21	0.20802953163873336	0.8733519991255545	304	0.4941020241989004	0.034968508333297635	lasso_tessels0162_alpha_-4	LASSO	glm7	sc1	sess	True	True	tessels0162	cerebellum_suit	True	4	crossed	False	-4	Mon Nov 29 17:09:29 2021
s22	0.21108538299746527	0.8925626998136672	304	0.4630299589284379	0.4369725736247769	lasso_tessels0162_alpha_-4	LASSO	glm7	sc1	sess	True	True	tessels0162	cerebellum_suit	True	4	crossed	False	-4	Mon Nov 29 17:11:50 2021
s24	0.2196659828530044	0.8452929526312143	304	0.4563036169894709	0.215853059555295	lasso_tessels0162_alpha_-4	LASSO	glm7	sc1	sess	True	True	tessels0162	cerebellum_suit	True	4	crossed	False	-4	Mon Nov 29 17:14:37 2021
s25	0.21019874373974834	0.8578072180097479	304	0.43317098612284255	0.22251740380102766	lasso_tessels0162_alpha_-4	LASSO	glm7	sc1	sess	True	True	tessels0162	cerebellum_suit	True	4	crossed	False	-4	Mon Nov 29 17:17:12 2021
s26	0.21766940711187546	0.8277231573376291	304	0.3927835911020506	0.3022341856795273	lasso_tessels0162_alpha_-4	LASSO	glm7	sc1	sess	True	True	tessels0162	cerebellum_suit	True	4	crossed	False	-4	Mon Nov 29 17:19:37 2021
s27	0.20631903093134746	0.8448557453799647	304	0.4120685446162203	0.2767761601762697	lasso_tessels0162_alpha_-4	LASSO	glm7	sc1	sess	True	True	tessels0162	cerebellum_suit	True	4	crossed	False	-4	Mon Nov 29 17:22:48 2021
s28	0.2111264231843952	0.8195573267409254	304	0.3972445451428659	0.20896749617175425	lasso_tessels0162_alpha_-4	LASSO	glm7	sc1	sess	True	True	tessels0162	cerebellum_suit	True	4	crossed	False	-4	Mon Nov 29 17:25:00 2021
s29	0.2484568227840728	0.8888632042857242	304	0.608105030202273	0.1815674056618979	lasso_tessels0162_alpha_-4	LASSO	glm7	sc1	sess	True	True	tessels0162	cerebellum_suit	True	4	crossed	False	-4	Mon Nov 29 17:29:00 2021
s30	0.211655667724361	0.8864651059136717	304	0.5313523568369247	0.11551004792832813	lasso_tessels0162_alpha_-4	LASSO	glm7	sc1	sess	True	True	tessels0162	cerebellum_suit	True	4	crossed	False	-4	Mon Nov 29 17:31:27 2021
s31	0.1996713890271261	0.8440918931974953	304	0.4146539449294109	0.1542153866463822	lasso_tessels0162_alpha_-4	LASSO	glm7	sc1	sess	True	True	tessels0162	cerebellum_suit	True	4	crossed	False	-4	Mon Nov 29 17:33:26 2021
s02	0.2613357709671665	0.7310559599289528	304	0.3518492141218635	0.42091760072913104	lasso_tessels0162_alpha_-3	LASSO	glm7	sc1	sess	True	True	tessels0162	cerebellum_suit	True	4	crossed	False	-3	Mon Nov 29 17:34:20 2021
s03	0.2881228932485922	0.7676462118680667	304	0.41930552415073696	0.454496034276662	lasso_tessels0162_alpha_-3	LASSO	glm7	sc1	sess	True	True	tessels0162	cerebellum_suit	True	4	crossed	False	-3	Mon Nov 29 17:35:24 2021
s04	0.2585106395917313	0.7248540670997149	304	0.3737125535105057	0.26778019997429797	lasso_tessels0162_alpha_-3	LASSO	glm7	sc1	sess	True	True	tessels0162	cerebellum_suit	True	4	crossed	False	-3	Mon Nov 29 17:36:36 2021
s06	0.2414738059420933	0.7506852215831861	304	0.3370552258153075	0.4462536412773544	lasso_tessels0162_alpha_-3	LASSO	glm7	sc1	sess	True	True	tessels0162	cerebellum_suit	True	4	crossed	False	-3	Mon Nov 29 17:37:36 2021
s08	0.3358765517208578	0.6715561362793734	304	0.4660589169941076	0.157840414175929	lasso_tessels0162_alpha_-3	LASSO	glm7	sc1	sess	True	True	tessels0162	cerebellum_suit	True	4	crossed	False	-3	Mon Nov 29 17:38:46 2021
s09	0.26796438373406833	0.6840461773320675	304	0.34314592949159706	0.4156000800047903	lasso_tessels0162_alpha_-3	LASSO	glm7	sc1	sess	True	True	tessels0162	cerebellum_suit	True	4	crossed	False	-3	Mon Nov 29 17:39:51 2021
s10	0.28649502017385003	0.7243010283755101	304	0.387430258285258	0.4222796422160394	lasso_tessels0162_alpha_-3	LASSO	glm7	sc1	sess	True	True	tessels0162	cerebellum_suit	True	4	crossed	False	-3	Mon Nov 29 17:40:55 2021
s12	0.282966875444606	0.7133759341675248	304	0.3959874075514396	0.31833848027962397	lasso_tessels0162_alpha_-3	LASSO	glm7	sc1	sess	True	True	tessels0162	cerebellum_suit	True	4	crossed	False	-3	Mon Nov 29 17:41:55 2021
s14	0.2805881368373771	0.6609201430885211	304	0.3716100940526271	0.2726576069724833	lasso_tessels0162_alpha_-3	LASSO	glm7	sc1	sess	True	True	tessels0162	cerebellum_suit	True	4	crossed	False	-3	Mon Nov 29 17:43:06 2021
s15	0.2825005734664133	0.7169901906399083	304	0.40389117649709777	0.24598892333868405	lasso_tessels0162_alpha_-3	LASSO	glm7	sc1	sess	True	True	tessels0162	cerebellum_suit	True	4	crossed	False	-3	Mon Nov 29 17:44:16 2021
s17	0.2777807808954372	0.7712946731056027	304	0.4116756737125886	0.4401300903410844	lasso_tessels0162_alpha_-3	LASSO	glm7	sc1	sess	True	True	tessels0162	cerebellum_suit	True	4	crossed	False	-3	Mon Nov 29 17:45:26 2021
s18	0.2393800089034571	0.6859797918418807	304	0.3198639753485031	0.22885974846572354	lasso_tessels0162_alpha_-3	LASSO	glm7	sc1	sess	True	True	tessels0162	cerebellum_suit	True	4	crossed	False	-3	Mon Nov 29 17:46:17 2021
s19	0.2387624244166263	0.6314334197452386	304	0.2978712265993451	0.3340259243265137	lasso_tessels0162_alpha_-3	LASSO	glm7	sc1	sess	True	True	tessels0162	cerebellum_suit	True	4	crossed	False	-3	Mon Nov 29 17:47:09 2021
s20	0.2672548643173333	0.6940754286753812	304	0.3513536823844562	0.3872002105228951	lasso_tessels0162_alpha_-3	LASSO	glm7	sc1	sess	True	True	tessels0162	cerebellum_suit	True	4	crossed	False	-3	Mon Nov 29 17:48:13 2021
s21	0.2920143578750374	0.7228473744475042	304	0.4532892841293221	0.03449790663260336	lasso_tessels0162_alpha_-3	LASSO	glm7	sc1	sess	True	True	tessels0162	cerebellum_suit	True	4	crossed	False	-3	Mon Nov 29 17:49:16 2021
s22	0.2791604338740481	0.7958802704350203	304	0.42941964060196103	0.4694326910247471	lasso_tessels0162_alpha_-3	LASSO	glm7	sc1	sess	True	True	tessels0162	cerebellum_suit	True	4	crossed	False	-3	Mon Nov 29 17:50:21 2021
s24	0.2896128999174054	0.6943110142827573	304	0.4097898838160029	0.2608665680317957	lasso_tessels0162_alpha_-3	LASSO	glm7	sc1	sess	True	True	tessels0162	cerebellum_suit	True	4	crossed	False	-3	Mon Nov 29 17:51:26 2021
s25	0.28221575989120856	0.7146632173326077	304	0.4066347539064378	0.2294847221088237	lasso_tessels0162_alpha_-3	LASSO	glm7	sc1	sess	True	True	tessels0162	cerebellum_suit	True	4	crossed	False	-3	Mon Nov 29 17:52:27 2021
s26	0.2791195778022998	0.6873862021504621	304	0.3709341860323726	0.3034754559531626	lasso_tessels0162_alpha_-3	LASSO	glm7	sc1	sess	True	True	tessels0162	cerebellum_suit	True	4	crossed	False	-3	Mon Nov 29 17:53:25 2021
s27	0.2727731687524216	0.6919903513346121	304	0.38083167528804296	0.2917837494671258	lasso_tessels0162_alpha_-3	LASSO	glm7	sc1	sess	True	True	tessels0162	cerebellum_suit	True	4	crossed	False	-3	Mon Nov 29 17:54:36 2021
s28	0.27363605843260075	0.6553559537999312	304	0.36324121056888	0.24445857418488426	lasso_tessels0162_alpha_-3	LASSO	glm7	sc1	sess	True	True	tessels0162	cerebellum_suit	True	4	crossed	False	-3	Mon Nov 29 17:55:33 2021
s29	0.34639846070042496	0.7565016396974481	304	0.5650172482326112	0.18037358060683686	lasso_tessels0162_alpha_-3	LASSO	glm7	sc1	sess	True	True	tessels0162	cerebellum_suit	True	4	crossed	False	-3	Mon Nov 29 17:56:47 2021
s30	0.2925486890732983	0.7598855996837391	304	0.4839547660366266	0.14020384738694353	lasso_tessels0162_alpha_-3	LASSO	glm7	sc1	sess	True	True	tessels0162	cerebellum_suit	True	4	crossed	False	-3	Mon Nov 29 17:57:56 2021
s31	0.2660457105405559	0.6871887318977905	304	0.3786606150443616	0.15329785166921348	lasso_tessels0162_alpha_-3	LASSO	glm7	sc1	sess	True	True	tessels0162	cerebellum_suit	True	4	crossed	False	-3	Mon Nov 29 17:58:51 2021
s02	0.2988851358329978	0.6355611594841301	1848	0.34829700470729297	0.4151090430785076	lasso_tessels1002_alpha_-2	LASSO	glm7	sc1	sess	True	True	tessels1002	cerebellum_suit	True	4	crossed	False	-2	Mon Nov 29 14:53:27 2021
s03	0.3276065281062932	0.6938839025343136	1848	0.40763086420445416	0.4599196317534809	lasso_tessels1002_alpha_-2	LASSO	glm7	sc1	sess	True	True	tessels1002	cerebellum_suit	True	4	crossed	False	-2	Mon Nov 29 14:56:03 2021
s04	0.2924416686572813	0.6292231998756949	1848	0.3561952809711971	0.28991522563165983	lasso_tessels1002_alpha_-2	LASSO	glm7	sc1	sess	True	True	tessels1002	cerebellum_suit	True	4	crossed	False	-2	Mon Nov 29 14:59:11 2021
s06	0.2785607147504111	0.6592000646528158	1848	0.33109708371917385	0.4374549312857389	lasso_tessels1002_alpha_-2	LASSO	glm7	sc1	sess	True	True	tessels1002	cerebellum_suit	True	4	crossed	False	-2	Mon Nov 29 15:01:40 2021
s08	0.3768699690885903	0.5712339674508977	1848	0.4405629253006378	0.17411323251894914	lasso_tessels1002_alpha_-2	LASSO	glm7	sc1	sess	True	True	tessels1002	cerebellum_suit	True	4	crossed	False	-2	Mon Nov 29 15:04:16 2021
s09	0.2989670494662668	0.588730975262588	1848	0.3436710968628429	0.3930675292067325	lasso_tessels1002_alpha_-2	LASSO	glm7	sc1	sess	True	True	tessels1002	cerebellum_suit	True	4	crossed	False	-2	Mon Nov 29 15:07:04 2021
s10	0.32463301128468675	0.6342334301244316	1848	0.3813903559619671	0.4089027009302283	lasso_tessels1002_alpha_-2	LASSO	glm7	sc1	sess	True	True	tessels1002	cerebellum_suit	True	4	crossed	False	-2	Mon Nov 29 15:09:41 2021
s12	0.32193971244844755	0.6169086299056247	1848	0.3847413184446489	0.3129570810901474	lasso_tessels1002_alpha_-2	LASSO	glm7	sc1	sess	True	True	tessels1002	cerebellum_suit	True	4	crossed	False	-2	Mon Nov 29 15:12:15 2021
s14	0.315435724723096	0.5543291489292312	1848	0.36218780537414746	0.2669532484195876	lasso_tessels1002_alpha_-2	LASSO	glm7	sc1	sess	True	True	tessels1002	cerebellum_suit	True	4	crossed	False	-2	Mon Nov 29 15:15:22 2021
s15	0.3272533746666181	0.6041057381678049	1848	0.3882598303622955	0.24721147777791985	lasso_tessels1002_alpha_-2	LASSO	glm7	sc1	sess	True	True	tessels1002	cerebellum_suit	True	4	crossed	False	-2	Mon Nov 29 15:18:20 2021
s17	0.3185744727802292	0.7033077884462118	1848	0.4006242028194582	0.4376134333784579	lasso_tessels1002_alpha_-2	LASSO	glm7	sc1	sess	True	True	tessels1002	cerebellum_suit	True	4	crossed	False	-2	Mon Nov 29 15:21:43 2021
s18	0.2798999686662114	0.5025658300836304	1848	0.31427259121853723	0.18890414904885508	lasso_tessels1002_alpha_-2	LASSO	glm7	sc1	sess	True	True	tessels1002	cerebellum_suit	True	4	crossed	False	-2	Mon Nov 29 15:23:28 2021
s19	0.2666234103296957	0.4975219301241232	1848	0.2972722079424098	0.2955476486453543	lasso_tessels1002_alpha_-2	LASSO	glm7	sc1	sess	True	True	tessels1002	cerebellum_suit	True	4	crossed	False	-2	Mon Nov 29 15:25:23 2021
s20	0.302298766767526	0.6003168071178537	1848	0.35029492199810364	0.3566015795098044	lasso_tessels1002_alpha_-2	LASSO	glm7	sc1	sess	True	True	tessels1002	cerebellum_suit	True	4	crossed	False	-2	Mon Nov 29 15:27:59 2021
s21	0.341729886513583	0.5866499462294164	1848	0.4239398383948523	0.028940661159078243	lasso_tessels1002_alpha_-2	LASSO	glm7	sc1	sess	True	True	tessels1002	cerebellum_suit	True	4	crossed	False	-2	Mon Nov 29 15:30:29 2021
s22	0.32268243496186244	0.7227585420630489	1848	0.4099625954368209	0.4895875641366216	lasso_tessels1002_alpha_-2	LASSO	glm7	sc1	sess	True	True	tessels1002	cerebellum_suit	True	4	crossed	False	-2	Mon Nov 29 15:33:21 2021
s24	0.3267262525730281	0.5992995968006629	1848	0.3941481680719891	0.2664612054786064	lasso_tessels1002_alpha_-2	LASSO	glm7	sc1	sess	True	True	tessels1002	cerebellum_suit	True	4	crossed	False	-2	Mon Nov 29 15:36:04 2021
s25	0.3237253345710731	0.6040372520138433	1848	0.39215544972251903	0.2243659110313249	lasso_tessels1002_alpha_-2	LASSO	glm7	sc1	sess	True	True	tessels1002	cerebellum_suit	True	4	crossed	False	-2	Mon Nov 29 15:38:15 2021
s26	0.31980058813393136	0.5620583131232493	1848	0.3670524030604224	0.2761492563188177	lasso_tessels1002_alpha_-2	LASSO	glm7	sc1	sess	True	True	tessels1002	cerebellum_suit	True	4	crossed	False	-2	Mon Nov 29 15:40:23 2021
s27	0.3079650966980953	0.5872528755720297	1848	0.3716527070732361	0.2570326220193431	lasso_tessels1002_alpha_-2	LASSO	glm7	sc1	sess	True	True	tessels1002	cerebellum_suit	True	4	crossed	False	-2	Mon Nov 29 15:43:19 2021
s28	0.3083261459907412	0.5328544165775393	1848	0.3489463557890136	0.2465271203639857	lasso_tessels1002_alpha_-2	LASSO	glm7	sc1	sess	True	True	tessels1002	cerebellum_suit	True	4	crossed	False	-2	Mon Nov 29 15:45:30 2021
s29	0.3912216308911963	0.6885431342531038	1848	0.5371343275614402	0.17630006848676827	lasso_tessels1002_alpha_-2	LASSO	glm7	sc1	sess	True	True	tessels1002	cerebellum_suit	True	4	crossed	False	-2	Mon Nov 29 15:48:10 2021
s30	0.34174617166784993	0.6717426862979453	1848	0.4573306819710539	0.13266175129809993	lasso_tessels1002_alpha_-2	LASSO	glm7	sc1	sess	True	True	tessels1002	cerebellum_suit	True	4	crossed	False	-2	Mon Nov 29 15:51:25 2021
s31	0.3045234033188003	0.5436102472382573	1848	0.3583739961904998	0.15419408246883304	lasso_tessels1002_alpha_-2	LASSO	glm7	sc1	sess	True	True	tessels1002	cerebellum_suit	True	4	crossed	False	-2	Mon Nov 29 15:53:37 2021
s02	0.3400939016676487	0.3551836584412508	1848	0.3690420099627554	0.2825689336311064	lasso_tessels1002_alpha_-1	LASSO	glm7	sc1	sess	True	True	tessels1002	cerebellum_suit	True	4	crossed	False	-1	Mon Nov 29 15:54:31 2021
s03	0.381387129030552	0.4501972832693102	1848	0.4271499393806705	0.36192915807938864	lasso_tessels1002_alpha_-1	LASSO	glm7	sc1	sess	True	True	tessels1002	cerebellum_suit	True	4	crossed	False	-1	Mon Nov 29 15:55:34 2021
s04	0.3286617390154016	0.3481396660025833	1848	0.3665926080027301	0.19058663194444272	lasso_tessels1002_alpha_-1	LASSO	glm7	sc1	sess	True	True	tessels1002	cerebellum_suit	True	4	crossed	False	-1	Mon Nov 29 15:57:49 2021
s06	0.3194084387988114	0.3948770744598601	1848	0.3485564599766411	0.32852893317689064	lasso_tessels1002_alpha_-1	LASSO	glm7	sc1	sess	True	True	tessels1002	cerebellum_suit	True	4	crossed	False	-1	Mon Nov 29 15:58:59 2021
s08	0.4197533477081798	0.17560051287058492	1848	0.4389077424421169	0.1273163105946387	lasso_tessels1002_alpha_-1	LASSO	glm7	sc1	sess	True	True	tessels1002	cerebellum_suit	True	4	crossed	False	-1	Mon Nov 29 16:00:11 2021
s09	0.33117370156506365	0.335058077657155	1848	0.3577704057986417	0.30219409788592977	lasso_tessels1002_alpha_-1	LASSO	glm7	sc1	sess	True	True	tessels1002	cerebellum_suit	True	4	crossed	False	-1	Mon Nov 29 16:01:47 2021
s10	0.3690018377938785	0.3755370354600716	1848	0.39498460470895796	0.3330409940847318	lasso_tessels1002_alpha_-1	LASSO	glm7	sc1	sess	True	True	tessels1002	cerebellum_suit	True	4	crossed	False	-1	Mon Nov 29 16:02:54 2021
s12	0.3641153250910803	0.3031763143279623	1848	0.3932946301142255	0.2427049317200004	lasso_tessels1002_alpha_-1	LASSO	glm7	sc1	sess	True	True	tessels1002	cerebellum_suit	True	4	crossed	False	-1	Mon Nov 29 16:04:13 2021
s14	0.3486708761239651	0.2016027914574474	1848	0.3708839755320753	0.15583016238560052	lasso_tessels1002_alpha_-1	LASSO	glm7	sc1	sess	True	True	tessels1002	cerebellum_suit	True	4	crossed	False	-1	Mon Nov 29 16:05:51 2021
s15	0.3695902257482697	0.2103820461198772	1848	0.3954893244841562	0.14457544274019812	lasso_tessels1002_alpha_-1	LASSO	glm7	sc1	sess	True	True	tessels1002	cerebellum_suit	True	4	crossed	False	-1	Mon Nov 29 16:07:32 2021
s17	0.3789153628720469	0.4331512556814751	1848	0.4223999732369809	0.32076109753088033	lasso_tessels1002_alpha_-1	LASSO	glm7	sc1	sess	True	True	tessels1002	cerebellum_suit	True	4	crossed	False	-1	Mon Nov 29 16:09:10 2021
s18	0.2995150929745685	0.14895750924788762	1848	0.3179808736234634	0.10347230468264364	lasso_tessels1002_alpha_-1	LASSO	glm7	sc1	sess	True	True	tessels1002	cerebellum_suit	True	4	crossed	False	-1	Mon Nov 29 16:10:12 2021
s19	0.28516481507310204	0.19481090282961253	1848	0.3075164328269787	0.1592718223568608	lasso_tessels1002_alpha_-1	LASSO	glm7	sc1	sess	True	True	tessels1002	cerebellum_suit	True	4	crossed	False	-1	Mon Nov 29 16:11:19 2021
s20	0.3399418837254662	0.2785547474788925	1848	0.3661181081641244	0.22375763862247933	lasso_tessels1002_alpha_-1	LASSO	glm7	sc1	sess	True	True	tessels1002	cerebellum_suit	True	4	crossed	False	-1	Mon Nov 29 16:12:23 2021
s21	0.3799930269278369	0.1517341693401371	1848	0.4063430297710226	0.026972001907099682	lasso_tessels1002_alpha_-1	LASSO	glm7	sc1	sess	True	True	tessels1002	cerebellum_suit	True	4	crossed	False	-1	Mon Nov 29 16:13:52 2021
s22	0.3789319812962863	0.5147510419194465	1848	0.4197670190199752	0.44891263721080976	lasso_tessels1002_alpha_-1	LASSO	glm7	sc1	sess	True	True	tessels1002	cerebellum_suit	True	4	crossed	False	-1	Mon Nov 29 16:15:13 2021
s24	0.3681392274043889	0.26902335603471816	1848	0.397575841075641	0.2002429331021965	lasso_tessels1002_alpha_-1	LASSO	glm7	sc1	sess	True	True	tessels1002	cerebellum_suit	True	4	crossed	False	-1	Mon Nov 29 16:16:30 2021
s25	0.36393155282272427	0.2491740045272011	1848	0.3914938885931229	0.1929610731821774	lasso_tessels1002_alpha_-1	LASSO	glm7	sc1	sess	True	True	tessels1002	cerebellum_suit	True	4	crossed	False	-1	Mon Nov 29 16:17:30 2021
s26	0.3533612290949336	0.2292727966646341	1848	0.37589246291708817	0.183568148906985	lasso_tessels1002_alpha_-1	LASSO	glm7	sc1	sess	True	True	tessels1002	cerebellum_suit	True	4	crossed	False	-1	Mon Nov 29 16:18:22 2021
s27	0.34287393939080224	0.2550935673875701	1848	0.37430818543182015	0.1957317901190567	lasso_tessels1002_alpha_-1	LASSO	glm7	sc1	sess	True	True	tessels1002	cerebellum_suit	True	4	crossed	False	-1	Mon Nov 29 16:20:00 2021
s28	0.3354653708460314	0.20202276447605064	1848	0.3543936991737863	0.13972390069372542	lasso_tessels1002_alpha_-1	LASSO	glm7	sc1	sess	True	True	tessels1002	cerebellum_suit	True	4	crossed	False	-1	Mon Nov 29 16:21:18 2021
s29	0.4621573112217368	0.35124210502169445	1848	0.5227265344626237	0.15786026325000807	lasso_tessels1002_alpha_-1	LASSO	glm7	sc1	sess	True	True	tessels1002	cerebellum_suit	True	4	crossed	False	-1	Mon Nov 29 16:22:31 2021
s30	0.4012793715682588	0.28919706469806905	1848	0.44479151648492143	0.11804002091377935	lasso_tessels1002_alpha_-1	LASSO	glm7	sc1	sess	True	True	tessels1002	cerebellum_suit	True	4	crossed	False	-1	Mon Nov 29 16:24:25 2021
s31	0.3303451970306486	0.2057529968563472	1848	0.3556549003169763	0.09401195325696213	lasso_tessels1002_alpha_-1	LASSO	glm7	sc1	sess	True	True	tessels1002	cerebellum_suit	True	4	crossed	False	-1	Mon Nov 29 16:25:55 2021
s02	0.3025894643771101	0.6153440378259906	1190	0.34865476033214976	0.4133488640483257	lasso_tessels0642_alpha_-2	LASSO	glm7	sc1	sess	True	True	tessels0642	cerebellum_suit	True	4	crossed	False	-2	Mon Nov 29 13:32:57 2021
s03	0.3329598889373349	0.6747828761490097	1190	0.41056609783389897	0.4508271890339256	lasso_tessels0642_alpha_-2	LASSO	glm7	sc1	sess	True	True	tessels0642	cerebellum_suit	True	4	crossed	False	-2	Mon Nov 29 13:34:36 2021
s04	0.2970796423328293	0.6047242881681927	1190	0.35829508907561114	0.27995644790969504	lasso_tessels0642_alpha_-2	LASSO	glm7	sc1	sess	True	True	tessels0642	cerebellum_suit	True	4	crossed	False	-2	Mon Nov 29 13:36:39 2021
s06	0.2821833007228832	0.6407877496889842	1190	0.3317338192363907	0.43424140627998187	lasso_tessels0642_alpha_-2	LASSO	glm7	sc1	sess	True	True	tessels0642	cerebellum_suit	True	4	crossed	False	-2	Mon Nov 29 13:38:15 2021
s08	0.3830333625657179	0.5353318381263558	1190	0.4404847413047605	0.17080985113015873	lasso_tessels0642_alpha_-2	LASSO	glm7	sc1	sess	True	True	tessels0642	cerebellum_suit	True	4	crossed	False	-2	Mon Nov 29 13:39:55 2021
s09	0.30211316307610986	0.5685311943009165	1190	0.3437037086758692	0.3930298085018058	lasso_tessels0642_alpha_-2	LASSO	glm7	sc1	sess	True	True	tessels0642	cerebellum_suit	True	4	crossed	False	-2	Mon Nov 29 13:41:46 2021
s10	0.32912477885286856	0.6139766801501748	1190	0.3784535022382161	0.4232744600498071	lasso_tessels0642_alpha_-2	LASSO	glm7	sc1	sess	True	True	tessels0642	cerebellum_suit	True	4	crossed	False	-2	Mon Nov 29 13:43:27 2021
s12	0.3265043104102847	0.5920353314496464	1190	0.3850657342140951	0.3094501484876585	lasso_tessels0642_alpha_-2	LASSO	glm7	sc1	sess	True	True	tessels0642	cerebellum_suit	True	4	crossed	False	-2	Mon Nov 29 13:45:08 2021
s14	0.3186950969948094	0.5317896046618904	1190	0.3618426040539394	0.26844039128475305	lasso_tessels0642_alpha_-2	LASSO	glm7	sc1	sess	True	True	tessels0642	cerebellum_suit	True	4	crossed	False	-2	Mon Nov 29 13:47:09 2021
s15	0.332878822155729	0.5714759782331058	1190	0.3885898733223433	0.2408095651583294	lasso_tessels0642_alpha_-2	LASSO	glm7	sc1	sess	True	True	tessels0642	cerebellum_suit	True	4	crossed	False	-2	Mon Nov 29 13:49:05 2021
s17	0.3234853214509967	0.6856803804534933	1190	0.4023150657973481	0.4338451405636732	lasso_tessels0642_alpha_-2	LASSO	glm7	sc1	sess	True	True	tessels0642	cerebellum_suit	True	4	crossed	False	-2	Mon Nov 29 13:51:14 2021
s18	0.2822520359461884	0.4760673688551258	1190	0.31336283750880634	0.19818748225022026	lasso_tessels0642_alpha_-2	LASSO	glm7	sc1	sess	True	True	tessels0642	cerebellum_suit	True	4	crossed	False	-2	Mon Nov 29 13:52:23 2021
s19	0.2681717120768267	0.4814460530787459	1190	0.2972327940909299	0.2975496102494434	lasso_tessels0642_alpha_-2	LASSO	glm7	sc1	sess	True	True	tessels0642	cerebellum_suit	True	4	crossed	False	-2	Mon Nov 29 13:53:39 2021
s20	0.3061466615479129	0.5746641092198497	1190	0.3513213069846442	0.34928068039178195	lasso_tessels0642_alpha_-2	LASSO	glm7	sc1	sess	True	True	tessels0642	cerebellum_suit	True	4	crossed	False	-2	Mon Nov 29 13:55:20 2021
s21	0.3483201896768055	0.5466003373697866	1190	0.4223567767415752	0.0264465367952278	lasso_tessels0642_alpha_-2	LASSO	glm7	sc1	sess	True	True	tessels0642	cerebellum_suit	True	4	crossed	False	-2	Mon Nov 29 13:56:58 2021
s22	0.32739886930091266	0.7081691934575012	1190	0.40943976042977104	0.491912855817588	lasso_tessels0642_alpha_-2	LASSO	glm7	sc1	sess	True	True	tessels0642	cerebellum_suit	True	4	crossed	False	-2	Mon Nov 29 13:58:48 2021
s24	0.3311599113381027	0.573226825095403	1190	0.3926385876836861	0.2708289023430592	lasso_tessels0642_alpha_-2	LASSO	glm7	sc1	sess	True	True	tessels0642	cerebellum_suit	True	4	crossed	False	-2	Mon Nov 29 14:00:33 2021
s25	0.3290945505723709	0.5733340682578425	1190	0.3915962418351519	0.22288277612133228	lasso_tessels0642_alpha_-2	LASSO	glm7	sc1	sess	True	True	tessels0642	cerebellum_suit	True	4	crossed	False	-2	Mon Nov 29 14:01:59 2021
s26	0.3238136951254639	0.5354289020482457	1190	0.36622475776802943	0.28116117769216953	lasso_tessels0642_alpha_-2	LASSO	glm7	sc1	sess	True	True	tessels0642	cerebellum_suit	True	4	crossed	False	-2	Mon Nov 29 14:03:21 2021
s27	0.3116448496125927	0.5622371808318187	1190	0.3693387287151251	0.2715178191783523	lasso_tessels0642_alpha_-2	LASSO	glm7	sc1	sess	True	True	tessels0642	cerebellum_suit	True	4	crossed	False	-2	Mon Nov 29 14:05:16 2021
s28	0.3114648755375712	0.5065968826373829	1190	0.3483655126071989	0.2539601899866688	lasso_tessels0642_alpha_-2	LASSO	glm7	sc1	sess	True	True	tessels0642	cerebellum_suit	True	4	crossed	False	-2	Mon Nov 29 14:06:42 2021
s29	0.4011241586011944	0.6555888036733825	1190	0.5359995707705623	0.17335702139046927	lasso_tessels0642_alpha_-2	LASSO	glm7	sc1	sess	True	True	tessels0642	cerebellum_suit	True	4	crossed	False	-2	Mon Nov 29 14:08:26 2021
s30	0.34774608981177346	0.6467745549594097	1190	0.4511453581763781	0.1643596488756561	lasso_tessels0642_alpha_-2	LASSO	glm7	sc1	sess	True	True	tessels0642	cerebellum_suit	True	4	crossed	False	-2	Mon Nov 29 14:10:31 2021
s31	0.30839161283611416	0.5127723189519212	1190	0.3586219119576988	0.14409262349681898	lasso_tessels0642_alpha_-2	LASSO	glm7	sc1	sess	True	True	tessels0642	cerebellum_suit	True	4	crossed	False	-2	Mon Nov 29 14:11:58 2021
s02	0.3403177500963157	0.3484311090638785	1190	0.3687529496090536	0.2863651994163621	lasso_tessels0642_alpha_-1	LASSO	glm7	sc1	sess	True	True	tessels0642	cerebellum_suit	True	4	crossed	False	-1	Mon Nov 29 14:12:37 2021
s03	0.38271137694540897	0.43641972646719146	1190	0.4286647726310641	0.3550188399525813	lasso_tessels0642_alpha_-1	LASSO	glm7	sc1	sess	True	True	tessels0642	cerebellum_suit	True	4	crossed	False	-1	Mon Nov 29 14:13:21 2021
s04	0.3296434426440793	0.3250954581166582	1190	0.3681369874841102	0.18416918979329427	lasso_tessels0642_alpha_-1	LASSO	glm7	sc1	sess	True	True	tessels0642	cerebellum_suit	True	4	crossed	False	-1	Mon Nov 29 14:14:53 2021
s06	0.31980349882569203	0.3881485605239392	1190	0.34882243114365963	0.325709279940139	lasso_tessels0642_alpha_-1	LASSO	glm7	sc1	sess	True	True	tessels0642	cerebellum_suit	True	4	crossed	False	-1	Mon Nov 29 14:15:43 2021
s08	0.4199426765971347	0.16757783759016406	1190	0.4390429945894857	0.1261161049274142	lasso_tessels0642_alpha_-1	LASSO	glm7	sc1	sess	True	True	tessels0642	cerebellum_suit	True	4	crossed	False	-1	Mon Nov 29 14:16:34 2021
s09	0.3313493701223623	0.3321244380757745	1190	0.35814730855296784	0.2998473394056737	lasso_tessels0642_alpha_-1	LASSO	glm7	sc1	sess	True	True	tessels0642	cerebellum_suit	True	4	crossed	False	-1	Mon Nov 29 14:17:41 2021
s10	0.3694510740714414	0.3692664211390821	1190	0.3951337491177965	0.33183859984948705	lasso_tessels0642_alpha_-1	LASSO	glm7	sc1	sess	True	True	tessels0642	cerebellum_suit	True	4	crossed	False	-1	Mon Nov 29 14:18:28 2021
s12	0.3645082518753597	0.29514841907960265	1190	0.3937043388253345	0.2377789957151153	lasso_tessels0642_alpha_-1	LASSO	glm7	sc1	sess	True	True	tessels0642	cerebellum_suit	True	4	crossed	False	-1	Mon Nov 29 14:19:24 2021
s14	0.3488203193723425	0.19630106766341296	1190	0.37099858530426144	0.15479634917115476	lasso_tessels0642_alpha_-1	LASSO	glm7	sc1	sess	True	True	tessels0642	cerebellum_suit	True	4	crossed	False	-1	Mon Nov 29 14:20:32 2021
s15	0.3699878899021351	0.19369039178530734	1190	0.3957848961577499	0.13958965875861507	lasso_tessels0642_alpha_-1	LASSO	glm7	sc1	sess	True	True	tessels0642	cerebellum_suit	True	4	crossed	False	-1	Mon Nov 29 14:21:44 2021
s17	0.3798255597563507	0.4225925918354497	1190	0.4236889222669135	0.3128916732370965	lasso_tessels0642_alpha_-1	LASSO	glm7	sc1	sess	True	True	tessels0642	cerebellum_suit	True	4	crossed	False	-1	Mon Nov 29 14:22:53 2021
s18	0.29953830189579433	0.14578887253528094	1190	0.3179932959645883	0.10357992597082248	lasso_tessels0642_alpha_-1	LASSO	glm7	sc1	sess	True	True	tessels0642	cerebellum_suit	True	4	crossed	False	-1	Mon Nov 29 14:23:37 2021
s19	0.28523225480501097	0.19050326734651726	1190	0.3076070024220422	0.15729265842959333	lasso_tessels0642_alpha_-1	LASSO	glm7	sc1	sess	True	True	tessels0642	cerebellum_suit	True	4	crossed	False	-1	Mon Nov 29 14:24:25 2021
s20	0.34020112883068115	0.2717586085396412	1190	0.3661955775838381	0.2237523574817893	lasso_tessels0642_alpha_-1	LASSO	glm7	sc1	sess	True	True	tessels0642	cerebellum_suit	True	4	crossed	False	-1	Mon Nov 29 14:25:09 2021
s21	0.3802420784260976	0.13548254511152386	1190	0.4062399683404957	0.027729995223104827	lasso_tessels0642_alpha_-1	LASSO	glm7	sc1	sess	True	True	tessels0642	cerebellum_suit	True	4	crossed	False	-1	Mon Nov 29 14:26:11 2021
s22	0.3797145442301717	0.5085502807212416	1190	0.42030550700890995	0.4468772690578081	lasso_tessels0642_alpha_-1	LASSO	glm7	sc1	sess	True	True	tessels0642	cerebellum_suit	True	4	crossed	False	-1	Mon Nov 29 14:27:07 2021
s24	0.3684560139774718	0.26117498254045635	1190	0.39771738424660025	0.19894960559403554	lasso_tessels0642_alpha_-1	LASSO	glm7	sc1	sess	True	True	tessels0642	cerebellum_suit	True	4	crossed	False	-1	Mon Nov 29 14:28:01 2021
s25	0.3641759663169046	0.24261510203581546	1190	0.39129916337880266	0.1961033775978024	lasso_tessels0642_alpha_-1	LASSO	glm7	sc1	sess	True	True	tessels0642	cerebellum_suit	True	4	crossed	False	-1	Mon Nov 29 14:28:44 2021
s26	0.35359722574465496	0.2220705620113128	1190	0.376116304347802	0.18101280389302965	lasso_tessels0642_alpha_-1	LASSO	glm7	sc1	sess	True	True	tessels0642	cerebellum_suit	True	4	crossed	False	-1	Mon Nov 29 14:29:22 2021
s27	0.3430368989541774	0.2497287429692901	1190	0.3742046460810482	0.19669669992159944	lasso_tessels0642_alpha_-1	LASSO	glm7	sc1	sess	True	True	tessels0642	cerebellum_suit	True	4	crossed	False	-1	Mon Nov 29 14:30:29 2021
s28	0.33558159493609296	0.19620807692149367	1190	0.35432913695553336	0.14463820718866144	lasso_tessels0642_alpha_-1	LASSO	glm7	sc1	sess	True	True	tessels0642	cerebellum_suit	True	4	crossed	False	-1	Mon Nov 29 14:31:25 2021
s29	0.4633521168462722	0.33217333548987044	1190	0.5225043412382757	0.1592391421967739	lasso_tessels0642_alpha_-1	LASSO	glm7	sc1	sess	True	True	tessels0642	cerebellum_suit	True	4	crossed	False	-1	Mon Nov 29 14:32:14 2021
s30	0.4018045647022673	0.2762408244217537	1190	0.4440858561705463	0.12973983283733542	lasso_tessels0642_alpha_-1	LASSO	glm7	sc1	sess	True	True	tessels0642	cerebellum_suit	True	4	crossed	False	-1	Mon Nov 29 14:33:31 2021
s31	0.33067104436082617	0.18853517096262595	1190	0.35583206348528074	0.08486987662244462	lasso_tessels0642_alpha_-1	LASSO	glm7	sc1	sess	True	True	tessels0642	cerebellum_suit	True	4	crossed	False	-1	Mon Nov 29 14:34:33 2021
s02	0.30685977902217243	0.5925955804374581	670	0.350077083336843	0.4050791891846973	lasso_tessels0362_alpha_-2	LASSO	glm7	sc1	sess	True	True	tessels0362	cerebellum_suit	True	4	crossed	False	-2	Mon Nov 29 12:52:10 2021
s03	0.3394551050853398	0.6494001012979099	670	0.4110431800182952	0.4483930972165745	lasso_tessels0362_alpha_-2	LASSO	glm7	sc1	sess	True	True	tessels0362	cerebellum_suit	True	4	crossed	False	-2	Mon Nov 29 12:53:09 2021
s04	0.3039824364432117	0.5642680447884446	670	0.36112746513433397	0.2579276468628827	lasso_tessels0362_alpha_-2	LASSO	glm7	sc1	sess	True	True	tessels0362	cerebellum_suit	True	4	crossed	False	-2	Mon Nov 29 12:54:25 2021
s06	0.2860227665970108	0.6200780873216699	670	0.33078358941994235	0.4387697236843972	lasso_tessels0362_alpha_-2	LASSO	glm7	sc1	sess	True	True	tessels0362	cerebellum_suit	True	4	crossed	False	-2	Mon Nov 29 12:55:24 2021
s08	0.3908502249168093	0.4835556344966998	670	0.43776293382719217	0.1811703850666108	lasso_tessels0362_alpha_-2	LASSO	glm7	sc1	sess	True	True	tessels0362	cerebellum_suit	True	4	crossed	False	-2	Mon Nov 29 12:56:24 2021
s09	0.3056867311703757	0.5452781592511327	670	0.3435128101197588	0.3945850853228004	lasso_tessels0362_alpha_-2	LASSO	glm7	sc1	sess	True	True	tessels0362	cerebellum_suit	True	4	crossed	False	-2	Mon Nov 29 12:57:30 2021
s10	0.3345077488826013	0.587431937767823	670	0.3792045258604405	0.4209535441277066	lasso_tessels0362_alpha_-2	LASSO	glm7	sc1	sess	True	True	tessels0362	cerebellum_suit	True	4	crossed	False	-2	Mon Nov 29 12:58:30 2021
s12	0.3321619101446661	0.5580709103767654	670	0.38370371902455935	0.31660452977876136	lasso_tessels0362_alpha_-2	LASSO	glm7	sc1	sess	True	True	tessels0362	cerebellum_suit	True	4	crossed	False	-2	Mon Nov 29 12:59:30 2021
s14	0.3223290809819576	0.5051022286869068	670	0.3613192638171907	0.271049531402775	lasso_tessels0362_alpha_-2	LASSO	glm7	sc1	sess	True	True	tessels0362	cerebellum_suit	True	4	crossed	False	-2	Mon Nov 29 13:00:43 2021
s15	0.3388565704579043	0.5327863048272482	670	0.3893118726441647	0.23131865258802936	lasso_tessels0362_alpha_-2	LASSO	glm7	sc1	sess	True	True	tessels0362	cerebellum_suit	True	4	crossed	False	-2	Mon Nov 29 13:01:54 2021
s17	0.3298228824349979	0.6603373707408662	670	0.4028682178210764	0.4314372479512048	lasso_tessels0362_alpha_-2	LASSO	glm7	sc1	sess	True	True	tessels0362	cerebellum_suit	True	4	crossed	False	-2	Mon Nov 29 13:03:09 2021
s18	0.2853850971524392	0.43854685241117997	670	0.3133942281440327	0.1959201110410725	lasso_tessels0362_alpha_-2	LASSO	glm7	sc1	sess	True	True	tessels0362	cerebellum_suit	True	4	crossed	False	-2	Mon Nov 29 13:03:53 2021
s19	0.2704212598420118	0.4560175186610128	670	0.29750759729574183	0.2972958874802556	lasso_tessels0362_alpha_-2	LASSO	glm7	sc1	sess	True	True	tessels0362	cerebellum_suit	True	4	crossed	False	-2	Mon Nov 29 13:04:40 2021
s20	0.3098104177719568	0.5503242646700656	670	0.3507044209951468	0.3529234183490587	lasso_tessels0362_alpha_-2	LASSO	glm7	sc1	sess	True	True	tessels0362	cerebellum_suit	True	4	crossed	False	-2	Mon Nov 29 13:05:40 2021
s21	0.354253614730969	0.5052321314792991	670	0.4182759236215961	0.038427761919303034	lasso_tessels0362_alpha_-2	LASSO	glm7	sc1	sess	True	True	tessels0362	cerebellum_suit	True	4	crossed	False	-2	Mon Nov 29 13:06:40 2021
s22	0.3339558589442828	0.6863349268664635	670	0.4082339053019961	0.4952714187975952	lasso_tessels0362_alpha_-2	LASSO	glm7	sc1	sess	True	True	tessels0362	cerebellum_suit	True	4	crossed	False	-2	Mon Nov 29 13:07:45 2021
s24	0.33663300302569105	0.5383521001240797	670	0.38962296713243616	0.28569936922516725	lasso_tessels0362_alpha_-2	LASSO	glm7	sc1	sess	True	True	tessels0362	cerebellum_suit	True	4	crossed	False	-2	Mon Nov 29 13:08:47 2021
s25	0.3354273196221406	0.5333365422113651	670	0.3914416144554237	0.21822963346967988	lasso_tessels0362_alpha_-2	LASSO	glm7	sc1	sess	True	True	tessels0362	cerebellum_suit	True	4	crossed	False	-2	Mon Nov 29 13:09:39 2021
s26	0.3278390672288049	0.5064676533020076	670	0.3664654235933008	0.2785203681863579	lasso_tessels0362_alpha_-2	LASSO	glm7	sc1	sess	True	True	tessels0362	cerebellum_suit	True	4	crossed	False	-2	Mon Nov 29 13:10:29 2021
s27	0.31685742866839184	0.5231326648761463	670	0.3692184614070154	0.2696322792844316	lasso_tessels0362_alpha_-2	LASSO	glm7	sc1	sess	True	True	tessels0362	cerebellum_suit	True	4	crossed	False	-2	Mon Nov 29 13:11:39 2021
s28	0.3154724684469584	0.4713075779390856	670	0.34882655958157105	0.25008031836968303	lasso_tessels0362_alpha_-2	LASSO	glm7	sc1	sess	True	True	tessels0362	cerebellum_suit	True	4	crossed	False	-2	Mon Nov 29 13:12:32 2021
s29	0.4135989289501084	0.6095713450621844	670	0.5350889809574982	0.17094811186768216	lasso_tessels0362_alpha_-2	LASSO	glm7	sc1	sess	True	True	tessels0362	cerebellum_suit	True	4	crossed	False	-2	Mon Nov 29 13:13:33 2021
s30	0.3565048990455367	0.6076720682205646	670	0.4522450381983496	0.15150206371509276	lasso_tessels0362_alpha_-2	LASSO	glm7	sc1	sess	True	True	tessels0362	cerebellum_suit	True	4	crossed	False	-2	Mon Nov 29 13:14:50 2021
s31	0.3122564030092669	0.4756720019336407	670	0.3569172763773181	0.15372762841230686	lasso_tessels0362_alpha_-2	LASSO	glm7	sc1	sess	True	True	tessels0362	cerebellum_suit	True	4	crossed	False	-2	Mon Nov 29 13:15:43 2021
s02	0.3410618451945193	0.3356068888704518	670	0.3698048185822736	0.2744900909283696	lasso_tessels0362_alpha_-1	LASSO	glm7	sc1	sess	True	True	tessels0362	cerebellum_suit	True	4	crossed	False	-1	Mon Nov 29 13:16:11 2021
s03	0.3841270649670096	0.42054176041935415	670	0.4300378721922679	0.3448804093665053	lasso_tessels0362_alpha_-1	LASSO	glm7	sc1	sess	True	True	tessels0362	cerebellum_suit	True	4	crossed	False	-1	Mon Nov 29 13:16:41 2021
s04	0.3309703624812136	0.30505735989979266	670	0.3707468662925849	0.1582952920262397	lasso_tessels0362_alpha_-1	LASSO	glm7	sc1	sess	True	True	tessels0362	cerebellum_suit	True	4	crossed	False	-1	Mon Nov 29 13:17:41 2021
s06	0.3203188879110285	0.3796760258710898	670	0.3491001149553011	0.3237353371809569	lasso_tessels0362_alpha_-1	LASSO	glm7	sc1	sess	True	True	tessels0362	cerebellum_suit	True	4	crossed	False	-1	Mon Nov 29 13:18:15 2021
s08	0.420331897580518	0.15013081454410027	670	0.4393888920363099	0.11925215119815133	lasso_tessels0362_alpha_-1	LASSO	glm7	sc1	sess	True	True	tessels0362	cerebellum_suit	True	4	crossed	False	-1	Mon Nov 29 13:18:50 2021
s09	0.3317258207695529	0.32500371053395183	670	0.358537584501321	0.2964366748616403	lasso_tessels0362_alpha_-1	LASSO	glm7	sc1	sess	True	True	tessels0362	cerebellum_suit	True	4	crossed	False	-1	Mon Nov 29 13:19:35 2021
s10	0.3700205673166348	0.3614279199201581	670	0.3958769621600351	0.3254443280069755	lasso_tessels0362_alpha_-1	LASSO	glm7	sc1	sess	True	True	tessels0362	cerebellum_suit	True	4	crossed	False	-1	Mon Nov 29 13:20:07 2021
s12	0.3650293160119984	0.2832680858971811	670	0.3939223984240505	0.2368624888560009	lasso_tessels0362_alpha_-1	LASSO	glm7	sc1	sess	True	True	tessels0362	cerebellum_suit	True	4	crossed	False	-1	Mon Nov 29 13:20:45 2021
s14	0.3490143570504572	0.1884540134079405	670	0.3710675473418356	0.1538700423422398	lasso_tessels0362_alpha_-1	LASSO	glm7	sc1	sess	True	True	tessels0362	cerebellum_suit	True	4	crossed	False	-1	Mon Nov 29 13:21:30 2021
s15	0.3703336232200275	0.17956269524479074	670	0.39612839151311696	0.13044334335497246	lasso_tessels0362_alpha_-1	LASSO	glm7	sc1	sess	True	True	tessels0362	cerebellum_suit	True	4	crossed	False	-1	Mon Nov 29 13:22:17 2021
s17	0.3808057361665645	0.41031388545721664	670	0.4240429487388513	0.3104744526966015	lasso_tessels0362_alpha_-1	LASSO	glm7	sc1	sess	True	True	tessels0362	cerebellum_suit	True	4	crossed	False	-1	Mon Nov 29 13:23:02 2021
s18	0.2996362287121909	0.1369688442441381	670	0.31810004339737474	0.09935618766894633	lasso_tessels0362_alpha_-1	LASSO	glm7	sc1	sess	True	True	tessels0362	cerebellum_suit	True	4	crossed	False	-1	Mon Nov 29 13:23:33 2021
s19	0.2853610435269914	0.18319591744804675	670	0.30769642802626196	0.15743917097013338	lasso_tessels0362_alpha_-1	LASSO	glm7	sc1	sess	True	True	tessels0362	cerebellum_suit	True	4	crossed	False	-1	Mon Nov 29 13:24:07 2021
s20	0.3405513868009929	0.26082529820068684	670	0.3665725366354325	0.2185462285559928	lasso_tessels0362_alpha_-1	LASSO	glm7	sc1	sess	True	True	tessels0362	cerebellum_suit	True	4	crossed	False	-1	Mon Nov 29 13:24:37 2021
s21	0.3804334772118521	0.1199336823438362	670	0.4058878171858108	0.03714810173553432	lasso_tessels0362_alpha_-1	LASSO	glm7	sc1	sess	True	True	tessels0362	cerebellum_suit	True	4	crossed	False	-1	Mon Nov 29 13:25:18 2021
s22	0.3808660360173749	0.4991826435155389	670	0.4207533863034984	0.4455062604445876	lasso_tessels0362_alpha_-1	LASSO	glm7	sc1	sess	True	True	tessels0362	cerebellum_suit	True	4	crossed	False	-1	Mon Nov 29 13:25:56 2021
s24	0.3689027117634362	0.2501695186870959	670	0.3981145068257442	0.19377886993574525	lasso_tessels0362_alpha_-1	LASSO	glm7	sc1	sess	True	True	tessels0362	cerebellum_suit	True	4	crossed	False	-1	Mon Nov 29 13:26:33 2021
s25	0.3647085325217533	0.22797404044972075	670	0.3918130365453572	0.1892022232250028	lasso_tessels0362_alpha_-1	LASSO	glm7	sc1	sess	True	True	tessels0362	cerebellum_suit	True	4	crossed	False	-1	Mon Nov 29 13:27:05 2021
s26	0.3538798457040985	0.21293252184807068	670	0.3763772869507938	0.17717346414414442	lasso_tessels0362_alpha_-1	LASSO	glm7	sc1	sess	True	True	tessels0362	cerebellum_suit	True	4	crossed	False	-1	Mon Nov 29 13:27:31 2021
s27	0.3433474708066199	0.24035704353772264	670	0.37430031742858544	0.1969690698157385	lasso_tessels0362_alpha_-1	LASSO	glm7	sc1	sess	True	True	tessels0362	cerebellum_suit	True	4	crossed	False	-1	Mon Nov 29 13:28:16 2021
s28	0.33579275626748184	0.1861274984235648	670	0.35441009234585075	0.14574003179392525	lasso_tessels0362_alpha_-1	LASSO	glm7	sc1	sess	True	True	tessels0362	cerebellum_suit	True	4	crossed	False	-1	Mon Nov 29 13:28:54 2021
s29	0.4653434958696834	0.3033378208482312	670	0.522529188145108	0.1592771413582772	lasso_tessels0362_alpha_-1	LASSO	glm7	sc1	sess	True	True	tessels0362	cerebellum_suit	True	4	crossed	False	-1	Mon Nov 29 13:29:27 2021
s30	0.4028056042058421	0.25144800786957616	670	0.4446714483209668	0.11935174669019265	lasso_tessels0362_alpha_-1	LASSO	glm7	sc1	sess	True	True	tessels0362	cerebellum_suit	True	4	crossed	False	-1	Mon Nov 29 13:30:18 2021
s31	0.33085813728127184	0.17693442285828176	670	0.3555798588472401	0.0926223814990564	lasso_tessels0362_alpha_-1	LASSO	glm7	sc1	sess	True	True	tessels0362	cerebellum_suit	True	4	crossed	False	-1	Mon Nov 29 13:31:01 2021
s02	0.3128456498938725	0.5567221754979053	304	0.35142629806581754	0.3971325081211468	lasso_tessels0162_alpha_-2	LASSO	glm7	sc1	sess	True	True	tessels0162	cerebellum_suit	True	4	crossed	False	-2	Mon Nov 29 11:57:58 2021
s03	0.3483294741219281	0.6128518694446293	304	0.4155794935750424	0.4297347758455238	lasso_tessels0162_alpha_-2	LASSO	glm7	sc1	sess	True	True	tessels0162	cerebellum_suit	True	4	crossed	False	-2	Mon Nov 29 11:58:30 2021
s04	0.3111579433467473	0.5113518333758407	304	0.3640936676934934	0.2458529701068228	lasso_tessels0162_alpha_-2	LASSO	glm7	sc1	sess	True	True	tessels0162	cerebellum_suit	True	4	crossed	False	-2	Mon Nov 29 11:59:15 2021
s06	0.29095765508574856	0.5920758006758395	304	0.33165553125745384	0.4341909788481577	lasso_tessels0162_alpha_-2	LASSO	glm7	sc1	sess	True	True	tessels0162	cerebellum_suit	True	4	crossed	False	-2	Mon Nov 29 11:59:48 2021
s08	0.399913167938702	0.4176382686781	304	0.4387219821468577	0.1662198711304499	lasso_tessels0162_alpha_-2	LASSO	glm7	sc1	sess	True	True	tessels0162	cerebellum_suit	True	4	crossed	False	-2	Mon Nov 29 12:00:22 2021
s09	0.30980541754811713	0.5157763838116646	304	0.3433440809865773	0.3971809223271214	lasso_tessels0162_alpha_-2	LASSO	glm7	sc1	sess	True	True	tessels0162	cerebellum_suit	True	4	crossed	False	-2	Mon Nov 29 12:01:00 2021
s10	0.3410144265961588	0.5538776471998801	304	0.3800195380194816	0.4148933929842822	lasso_tessels0162_alpha_-2	LASSO	glm7	sc1	sess	True	True	tessels0162	cerebellum_suit	True	4	crossed	False	-2	Mon Nov 29 12:01:33 2021
s12	0.3387352928853342	0.5156563385556908	304	0.3834799881230288	0.3165698089106861	lasso_tessels0162_alpha_-2	LASSO	glm7	sc1	sess	True	True	tessels0162	cerebellum_suit	True	4	crossed	False	-2	Mon Nov 29 12:02:07 2021
s14	0.3272338684645928	0.4657761873503301	304	0.3612335385168042	0.27012857044671146	lasso_tessels0162_alpha_-2	LASSO	glm7	sc1	sess	True	True	tessels0162	cerebellum_suit	True	4	crossed	False	-2	Mon Nov 29 12:02:48 2021
s15	0.3459626559873025	0.4804883710918421	304	0.3892783456258628	0.2275746586449164	lasso_tessels0162_alpha_-2	LASSO	glm7	sc1	sess	True	True	tessels0162	cerebellum_suit	True	4	crossed	False	-2	Mon Nov 29 12:03:28 2021
s17	0.3379342269780339	0.6270166070415909	304	0.4049147029069224	0.4237219478613394	lasso_tessels0162_alpha_-2	LASSO	glm7	sc1	sess	True	True	tessels0162	cerebellum_suit	True	4	crossed	False	-2	Mon Nov 29 12:04:09 2021
s18	0.289022846550318	0.3877457850282572	304	0.3136458051633439	0.1886179596815356	lasso_tessels0162_alpha_-2	LASSO	glm7	sc1	sess	True	True	tessels0162	cerebellum_suit	True	4	crossed	False	-2	Mon Nov 29 12:04:37 2021
s19	0.2734159091344223	0.4193572114379025	304	0.2990338665895951	0.27983480079612044	lasso_tessels0162_alpha_-2	LASSO	glm7	sc1	sess	True	True	tessels0162	cerebellum_suit	True	4	crossed	False	-2	Mon Nov 29 12:05:05 2021
s20	0.3147121285443374	0.5152525439852249	304	0.3514843310027194	0.3462031930894495	lasso_tessels0162_alpha_-2	LASSO	glm7	sc1	sess	True	True	tessels0162	cerebellum_suit	True	4	crossed	False	-2	Mon Nov 29 12:05:39 2021
s21	0.3622504353104621	0.4335123904422317	304	0.41685796020868027	0.030729446913915687	lasso_tessels0162_alpha_-2	LASSO	glm7	sc1	sess	True	True	tessels0162	cerebellum_suit	True	4	crossed	False	-2	Mon Nov 29 12:06:13 2021
s22	0.3421498482184329	0.6571369882419965	304	0.4102422038758236	0.4882104021585546	lasso_tessels0162_alpha_-2	LASSO	glm7	sc1	sess	True	True	tessels0162	cerebellum_suit	True	4	crossed	False	-2	Mon Nov 29 12:06:49 2021
s24	0.3428970103691301	0.4949528046518351	304	0.3888375953763265	0.28891693257797285	lasso_tessels0162_alpha_-2	LASSO	glm7	sc1	sess	True	True	tessels0162	cerebellum_suit	True	4	crossed	False	-2	Mon Nov 29 12:07:24 2021
s25	0.3426611670014256	0.4790690771994223	304	0.3904892523277079	0.21976881170258966	lasso_tessels0162_alpha_-2	LASSO	glm7	sc1	sess	True	True	tessels0162	cerebellum_suit	True	4	crossed	False	-2	Mon Nov 29 12:07:55 2021
s26	0.3329531644295681	0.4656012536214593	304	0.3670130994981359	0.2733085543750808	lasso_tessels0162_alpha_-2	LASSO	glm7	sc1	sess	True	True	tessels0162	cerebellum_suit	True	4	crossed	False	-2	Mon Nov 29 12:08:23 2021
s27	0.3226359366691017	0.4750088756604893	304	0.3673769383801686	0.2789682771588278	lasso_tessels0162_alpha_-2	LASSO	glm7	sc1	sess	True	True	tessels0162	cerebellum_suit	True	4	crossed	False	-2	Mon Nov 29 12:09:02 2021
s28	0.3200053516856025	0.4249363384628321	304	0.3491901239912684	0.2425034687592177	lasso_tessels0162_alpha_-2	LASSO	glm7	sc1	sess	True	True	tessels0162	cerebellum_suit	True	4	crossed	False	-2	Mon Nov 29 12:09:34 2021
s29	0.42782250710114905	0.5458757579631114	304	0.5310314183598719	0.17648592551621028	lasso_tessels0162_alpha_-2	LASSO	glm7	sc1	sess	True	True	tessels0162	cerebellum_suit	True	4	crossed	False	-2	Mon Nov 29 12:10:08 2021
s30	0.3665559328541686	0.5530008793155378	304	0.4487775925239744	0.15818670890053324	lasso_tessels0162_alpha_-2	LASSO	glm7	sc1	sess	True	True	tessels0162	cerebellum_suit	True	4	crossed	False	-2	Mon Nov 29 12:10:50 2021
s31	0.31774657351429464	0.4170993448507928	304	0.3584951114244871	0.12967358729592535	lasso_tessels0162_alpha_-2	LASSO	glm7	sc1	sess	True	True	tessels0162	cerebellum_suit	True	4	crossed	False	-2	Mon Nov 29 12:11:25 2021
s02	0.34182843464926765	0.3207118792186289	304	0.3708159582583159	0.2641029146192683	lasso_tessels0162_alpha_-1	LASSO	glm7	sc1	sess	True	True	tessels0162	cerebellum_suit	True	4	crossed	False	-1	Mon Nov 29 12:11:45 2021
s03	0.3860864560198654	0.3962998578689148	304	0.4321186038616404	0.3317075153997168	lasso_tessels0162_alpha_-1	LASSO	glm7	sc1	sess	True	True	tessels0162	cerebellum_suit	True	4	crossed	False	-1	Mon Nov 29 12:12:07 2021
s04	0.33206129401959555	0.2747284638813592	304	0.3724953196952	0.12845181033174194	lasso_tessels0162_alpha_-1	LASSO	glm7	sc1	sess	True	True	tessels0162	cerebellum_suit	True	4	crossed	False	-1	Mon Nov 29 12:12:45 2021
s06	0.32113808471253985	0.3647174213720801	304	0.3500210105211361	0.3160777174332562	lasso_tessels0162_alpha_-1	LASSO	glm7	sc1	sess	True	True	tessels0162	cerebellum_suit	True	4	crossed	False	-1	Mon Nov 29 12:13:08 2021
s08	0.42073805968061095	0.1291236046053131	304	0.43981889663057816	0.10866516041616152	lasso_tessels0162_alpha_-1	LASSO	glm7	sc1	sess	True	True	tessels0162	cerebellum_suit	True	4	crossed	False	-1	Mon Nov 29 12:13:33 2021
s09	0.33195991155289817	0.3205504607216064	304	0.3587440931209092	0.2955665860010069	lasso_tessels0162_alpha_-1	LASSO	glm7	sc1	sess	True	True	tessels0162	cerebellum_suit	True	4	crossed	False	-1	Mon Nov 29 12:14:02 2021
s10	0.3707996574788509	0.34969544495801264	304	0.39661952302891335	0.3183205754961334	lasso_tessels0162_alpha_-1	LASSO	glm7	sc1	sess	True	True	tessels0162	cerebellum_suit	True	4	crossed	False	-1	Mon Nov 29 12:14:27 2021
s12	0.3656603579316007	0.2687602476939166	304	0.39452372815995795	0.23072726789702525	lasso_tessels0162_alpha_-1	LASSO	glm7	sc1	sess	True	True	tessels0162	cerebellum_suit	True	4	crossed	False	-1	Mon Nov 29 12:14:53 2021
s14	0.349297979887803	0.17725955165722435	304	0.3713304416871739	0.14915414500481128	lasso_tessels0162_alpha_-1	LASSO	glm7	sc1	sess	True	True	tessels0162	cerebellum_suit	True	4	crossed	False	-1	Mon Nov 29 12:15:24 2021
s15	0.3708109775204302	0.15704387542939646	304	0.3963474577846629	0.1274871212879726	lasso_tessels0162_alpha_-1	LASSO	glm7	sc1	sess	True	True	tessels0162	cerebellum_suit	True	4	crossed	False	-1	Mon Nov 29 12:15:54 2021
s17	0.3826237517653239	0.3871919273863656	304	0.4255727241377579	0.30241308285888185	lasso_tessels0162_alpha_-1	LASSO	glm7	sc1	sess	True	True	tessels0162	cerebellum_suit	True	4	crossed	False	-1	Mon Nov 29 12:16:24 2021
s18	0.29970517155709125	0.12847516639087944	304	0.3180460991678202	0.10628550311325473	lasso_tessels0162_alpha_-1	LASSO	glm7	sc1	sess	True	True	tessels0162	cerebellum_suit	True	4	crossed	False	-1	Mon Nov 29 12:16:47 2021
s19	0.2855726141886911	0.17032508216154382	304	0.3081590312253665	0.14373130446709895	lasso_tessels0162_alpha_-1	LASSO	glm7	sc1	sess	True	True	tessels0162	cerebellum_suit	True	4	crossed	False	-1	Mon Nov 29 12:17:11 2021
s20	0.34105914564126144	0.24424191032633635	304	0.3670520168900242	0.2120342371661172	lasso_tessels0162_alpha_-1	LASSO	glm7	sc1	sess	True	True	tessels0162	cerebellum_suit	True	4	crossed	False	-1	Mon Nov 29 12:17:33 2021
s21	0.38059007583646015	0.1042113459252516	304	0.4058654892637268	0.03687667918889869	lasso_tessels0162_alpha_-1	LASSO	glm7	sc1	sess	True	True	tessels0162	cerebellum_suit	True	4	crossed	False	-1	Mon Nov 29 12:18:01 2021
s22	0.3825356190809497	0.4850937908842734	304	0.42260836323552003	0.4360216155825144	lasso_tessels0162_alpha_-1	LASSO	glm7	sc1	sess	True	True	tessels0162	cerebellum_suit	True	4	crossed	False	-1	Mon Nov 29 12:18:27 2021
s24	0.36942441461088776	0.2352213711137909	304	0.3982996641935733	0.19197810970001086	lasso_tessels0162_alpha_-1	LASSO	glm7	sc1	sess	True	True	tessels0162	cerebellum_suit	True	4	crossed	False	-1	Mon Nov 29 12:18:52 2021
s25	0.3652229918014047	0.21245275923201845	304	0.3922081391976228	0.18459744965069352	lasso_tessels0162_alpha_-1	LASSO	glm7	sc1	sess	True	True	tessels0162	cerebellum_suit	True	4	crossed	False	-1	Mon Nov 29 12:19:14 2021
s26	0.354244463217758	0.20039261189401672	304	0.3767171420240018	0.17291799343739755	lasso_tessels0162_alpha_-1	LASSO	glm7	sc1	sess	True	True	tessels0162	cerebellum_suit	True	4	crossed	False	-1	Mon Nov 29 12:19:34 2021
s27	0.3437180642401293	0.2288779310840732	304	0.3745093415657164	0.196138744857901	lasso_tessels0162_alpha_-1	LASSO	glm7	sc1	sess	True	True	tessels0162	cerebellum_suit	True	4	crossed	False	-1	Mon Nov 29 12:20:04 2021
s28	0.3360472958800811	0.17018973808120486	304	0.35480330565290585	0.13467154457167405	lasso_tessels0162_alpha_-1	LASSO	glm7	sc1	sess	True	True	tessels0162	cerebellum_suit	True	4	crossed	False	-1	Mon Nov 29 12:20:30 2021
s29	0.4669897253968394	0.2766156048798161	304	0.5221442681983132	0.1622617040120548	lasso_tessels0162_alpha_-1	LASSO	glm7	sc1	sess	True	True	tessels0162	cerebellum_suit	True	4	crossed	False	-1	Mon Nov 29 12:20:54 2021
s30	0.4037131232868736	0.224911941664927	304	0.4447362919966628	0.11779070815045894	lasso_tessels0162_alpha_-1	LASSO	glm7	sc1	sess	True	True	tessels0162	cerebellum_suit	True	4	crossed	False	-1	Mon Nov 29 12:21:30 2021
s31	0.3312824246945368	0.14627596598943893	304	0.3560314602457145	0.08031486251090705	lasso_tessels0162_alpha_-1	LASSO	glm7	sc1	sess	True	True	tessels0162	cerebellum_suit	True	4	crossed	False	-1	Mon Nov 29 12:21:58 2021
