# Supplementary material for: A task-general connectivity model reveals variation in convergence of cortical inputs to functional regions of the cerebellum
Source: eLife. 2023 Apr 21;12:e81511. doi: 10.7554/eLife.81511 (PMC10129326; doi:10.7554/eLife.81511)
Supplement: Figure 2—figure supplement 4—source data 2. [file elife-81511-fig2-figsupp4-data2.csv]

	subj_id	rmse_train	R_train	num_regions	rmse_cv	R_cv	name	model	glm	train_exp	averaging	weighting	X_data	Y_data	validate_model	cv_fold	mode	save_weights	hyperparameter	timestamp
105	s08	0.3754445322886962	0.4609891762191409	7	0.4793090595262194	0.17236592109703794	ridge_mdtb4002_wb_indv_7_alpha_-2	L2regression	glm7	sc1	sess	True	mdtb4002_wb_indv_7	cerebellum_suit	True	4	crossed	False	-2	Wed Nov 24 01:27:15 2021
106	s26	0.31200555728246004	0.499419232701917	7	0.4028095778009786	0.19759440322013666	ridge_mdtb4002_wb_indv_7_alpha_-2	L2regression	glm7	sc1	sess	True	mdtb4002_wb_indv_7	cerebellum_suit	True	4	crossed	False	-2	Wed Nov 24 01:27:17 2021
107	s04	0.2907853714643113	0.5125535244210775	7	0.395702478276372	0.22072927293433647	ridge_mdtb4002_wb_indv_7_alpha_-2	L2regression	glm7	sc1	sess	True	mdtb4002_wb_indv_7	cerebellum_suit	True	4	crossed	False	-2	Wed Nov 24 01:27:18 2021
108	s14	0.30040016902927563	0.5322604446199818	7	0.3914066616836982	0.24596348878644525	ridge_mdtb4002_wb_indv_7_alpha_-2	L2regression	glm7	sc1	sess	True	mdtb4002_wb_indv_7	cerebellum_suit	True	4	crossed	False	-2	Wed Nov 24 01:27:19 2021
109	s06	0.26102750374619865	0.6492721132244829	7	0.35041215319610963	0.4317095569670279	ridge_mdtb4002_wb_indv_7_alpha_-2	L2regression	glm7	sc1	sess	True	mdtb4002_wb_indv_7	cerebellum_suit	True	4	crossed	False	-2	Wed Nov 24 01:27:20 2021
110	s22	0.3183993713767061	0.6731408035890715	7	0.43255711355241744	0.4772471816299867	ridge_mdtb4002_wb_indv_7_alpha_-2	L2regression	glm7	sc1	sess	True	mdtb4002_wb_indv_7	cerebellum_suit	True	4	crossed	False	-2	Wed Nov 24 01:27:22 2021
111	s21	0.3399170249079684	0.4565348471809302	7	0.4619422751821536	0.08579488297539035	ridge_mdtb4002_wb_indv_7_alpha_-2	L2regression	glm7	sc1	sess	True	mdtb4002_wb_indv_7	cerebellum_suit	True	4	crossed	False	-2	Wed Nov 24 01:27:23 2021
112	s08	0.375509863231142	0.460877702351724	7	0.4748042586995002	0.17363888648349213	ridge_mdtb4002_wb_indv_7_alpha_0	L2regression	glm7	sc1	sess	True	mdtb4002_wb_indv_7	cerebellum_suit	True	4	crossed	False	0	Wed Nov 24 01:27:24 2021
113	s26	0.31205374673222563	0.4993170165251874	7	0.3991165333808216	0.20100652877686734	ridge_mdtb4002_wb_indv_7_alpha_0	L2regression	glm7	sc1	sess	True	mdtb4002_wb_indv_7	cerebellum_suit	True	4	crossed	False	0	Wed Nov 24 01:27:26 2021
114	s04	0.2910216015339181	0.5116089196498864	7	0.39039717229888266	0.22476571007414853	ridge_mdtb4002_wb_indv_7_alpha_0	L2regression	glm7	sc1	sess	True	mdtb4002_wb_indv_7	cerebellum_suit	True	4	crossed	False	0	Wed Nov 24 01:27:27 2021
115	s14	0.30112376513632305	0.5294609036524812	7	0.3828762323116293	0.2577897337885149	ridge_mdtb4002_wb_indv_7_alpha_0	L2regression	glm7	sc1	sess	True	mdtb4002_wb_indv_7	cerebellum_suit	True	4	crossed	False	0	Wed Nov 24 01:27:29 2021
116	s06	0.2610694065734656	0.6491985182510175	7	0.348048492474323	0.4336379438782243	ridge_mdtb4002_wb_indv_7_alpha_0	L2regression	glm7	sc1	sess	True	mdtb4002_wb_indv_7	cerebellum_suit	True	4	crossed	False	0	Wed Nov 24 01:27:30 2021
117	s22	0.3184918564293881	0.6729859808284814	7	0.4293547381828999	0.4798063176881599	ridge_mdtb4002_wb_indv_7_alpha_0	L2regression	glm7	sc1	sess	True	mdtb4002_wb_indv_7	cerebellum_suit	True	4	crossed	False	0	Wed Nov 24 01:27:31 2021
118	s21	0.33999807187061065	0.4563379429052994	7	0.4551210229647289	0.0857210170821137	ridge_mdtb4002_wb_indv_7_alpha_0	L2regression	glm7	sc1	sess	True	mdtb4002_wb_indv_7	cerebellum_suit	True	4	crossed	False	0	Wed Nov 24 01:27:32 2021
119	s08	0.37748386230566494	0.4570652681353994	7	0.4588684916745744	0.1775034849272048	ridge_mdtb4002_wb_indv_7_alpha_2	L2regression	glm7	sc1	sess	True	mdtb4002_wb_indv_7	cerebellum_suit	True	4	crossed	False	2	Wed Nov 24 01:27:34 2021
120	s26	0.31354616681148145	0.4958988511111821	7	0.38501094427651145	0.2154300037648876	ridge_mdtb4002_wb_indv_7_alpha_2	L2regression	glm7	sc1	sess	True	mdtb4002_wb_indv_7	cerebellum_suit	True	4	crossed	False	2	Wed Nov 24 01:27:35 2021
121	s04	0.2934715639868834	0.5024399068512901	7	0.37766662878010704	0.2310514810972124	ridge_mdtb4002_wb_indv_7_alpha_2	L2regression	glm7	sc1	sess	True	mdtb4002_wb_indv_7	cerebellum_suit	True	4	crossed	False	2	Wed Nov 24 01:27:36 2021
122	s14	0.3053157901813748	0.5137331206187952	7	0.3668586578825009	0.28440686662466474	ridge_mdtb4002_wb_indv_7_alpha_2	L2regression	glm7	sc1	sess	True	mdtb4002_wb_indv_7	cerebellum_suit	True	4	crossed	False	2	Wed Nov 24 01:27:37 2021
123	s06	0.2624715527346563	0.6467456504696641	7	0.3382291277057607	0.4402353868338914	ridge_mdtb4002_wb_indv_7_alpha_2	L2regression	glm7	sc1	sess	True	mdtb4002_wb_indv_7	cerebellum_suit	True	4	crossed	False	2	Wed Nov 24 01:27:38 2021
124	s22	0.32087227538086704	0.6690464451436277	7	0.41868620026375614	0.4850761736633524	ridge_mdtb4002_wb_indv_7_alpha_2	L2regression	glm7	sc1	sess	True	mdtb4002_wb_indv_7	cerebellum_suit	True	4	crossed	False	2	Wed Nov 24 01:27:40 2021
125	s21	0.34206065723632256	0.4511648172908064	7	0.43145152172735857	0.082859038121652	ridge_mdtb4002_wb_indv_7_alpha_2	L2regression	glm7	sc1	sess	True	mdtb4002_wb_indv_7	cerebellum_suit	True	4	crossed	False	2	Wed Nov 24 01:27:41 2021
126	s08	0.3915117507302108	0.4194215804907056	7	0.4427855997625469	0.17149031733244216	ridge_mdtb4002_wb_indv_7_alpha_4	L2regression	glm7	sc1	sess	True	mdtb4002_wb_indv_7	cerebellum_suit	True	4	crossed	False	4	Wed Nov 24 01:27:42 2021
127	s26	0.3251894266942577	0.4659464112936486	7	0.3721700055977879	0.22792558504590035	ridge_mdtb4002_wb_indv_7_alpha_4	L2regression	glm7	sc1	sess	True	mdtb4002_wb_indv_7	cerebellum_suit	True	4	crossed	False	4	Wed Nov 24 01:27:44 2021
128	s04	0.3037329890583097	0.473022040735443	7	0.36415726955221983	0.2337767596696015	ridge_mdtb4002_wb_indv_7_alpha_4	L2regression	glm7	sc1	sess	True	mdtb4002_wb_indv_7	cerebellum_suit	True	4	crossed	False	4	Wed Nov 24 01:27:45 2021
129	s14	0.3175792674207296	0.4675682693371473	7	0.35813671424652105	0.2985612481630128	ridge_mdtb4002_wb_indv_7_alpha_4	L2regression	glm7	sc1	sess	True	mdtb4002_wb_indv_7	cerebellum_suit	True	4	crossed	False	4	Wed Nov 24 01:27:46 2021
130	s06	0.2765605601260803	0.6249048988142356	7	0.33189093220618304	0.4360045429023083	ridge_mdtb4002_wb_indv_7_alpha_4	L2regression	glm7	sc1	sess	True	mdtb4002_wb_indv_7	cerebellum_suit	True	4	crossed	False	4	Wed Nov 24 01:27:48 2021
131	s22	0.3376304463602404	0.6484393434154504	7	0.41449030779596185	0.476939095136173	ridge_mdtb4002_wb_indv_7_alpha_4	L2regression	glm7	sc1	sess	True	mdtb4002_wb_indv_7	cerebellum_suit	True	4	crossed	False	4	Wed Nov 24 01:27:49 2021
132	s21	0.3548983730381334	0.4148860933443932	7	0.4114962935680771	0.053356411433323016	ridge_mdtb4002_wb_indv_7_alpha_4	L2regression	glm7	sc1	sess	True	mdtb4002_wb_indv_7	cerebellum_suit	True	4	crossed	False	4	Wed Nov 24 01:27:50 2021
133	s08	0.4107968524564414	0.3410294080314462	7	0.44021966618714825	0.14313962693878196	ridge_mdtb4002_wb_indv_7_alpha_6	L2regression	glm7	sc1	sess	True	mdtb4002_wb_indv_7	cerebellum_suit	True	4	crossed	False	6	Wed Nov 24 01:27:51 2021
134	s26	0.3447051906300286	0.393557155790239	7	0.3758914569110344	0.2101801274333241	ridge_mdtb4002_wb_indv_7_alpha_6	L2regression	glm7	sc1	sess	True	mdtb4002_wb_indv_7	cerebellum_suit	True	4	crossed	False	6	Wed Nov 24 01:27:52 2021
135	s04	0.32218627882823264	0.40486886141768735	7	0.3666053651546751	0.21328723386436016	ridge_mdtb4002_wb_indv_7_alpha_6	L2regression	glm7	sc1	sess	True	mdtb4002_wb_indv_7	cerebellum_suit	True	4	crossed	False	6	Wed Nov 24 01:27:53 2021
136	s14	0.3350456153227498	0.3825209609109382	7	0.3643444501895667	0.274295932376714	ridge_mdtb4002_wb_indv_7_alpha_6	L2regression	glm7	sc1	sess	True	mdtb4002_wb_indv_7	cerebellum_suit	True	4	crossed	False	6	Wed Nov 24 01:27:55 2021
137	s06	0.3085637540935579	0.5895574051479394	7	0.3518409162764094	0.4146987420432351	ridge_mdtb4002_wb_indv_7_alpha_6	L2regression	glm7	sc1	sess	True	mdtb4002_wb_indv_7	cerebellum_suit	True	4	crossed	False	6	Wed Nov 24 01:27:56 2021
138	s22	0.3757469160682291	0.6161121452304971	7	0.4450581859450559	0.4507400655410898	ridge_mdtb4002_wb_indv_7_alpha_6	L2regression	glm7	sc1	sess	True	mdtb4002_wb_indv_7	cerebellum_suit	True	4	crossed	False	6	Wed Nov 24 01:27:57 2021
139	s21	0.3722280680845075	0.33264866260641385	7	0.4072998526607832	0.0006619259774650237	ridge_mdtb4002_wb_indv_7_alpha_6	L2regression	glm7	sc1	sess	True	mdtb4002_wb_indv_7	cerebellum_suit	True	4	crossed	False	6	Wed Nov 24 01:27:58 2021
140	s08	0.4196054273090313	0.2955681893803668	7	0.4412340435249146	0.12561402839940633	ridge_mdtb4002_wb_indv_7_alpha_8	L2regression	glm7	sc1	sess	True	mdtb4002_wb_indv_7	cerebellum_suit	True	4	crossed	False	8	Wed Nov 24 01:27:59 2021
141	s26	0.3542554941548637	0.3471364150221118	7	0.38033195019881183	0.1960077002386192	ridge_mdtb4002_wb_indv_7_alpha_8	L2regression	glm7	sc1	sess	True	mdtb4002_wb_indv_7	cerebellum_suit	True	4	crossed	False	8	Wed Nov 24 01:28:00 2021
142	s04	0.3323325007803527	0.3628263228296697	7	0.37131616275792495	0.19839945338128948	ridge_mdtb4002_wb_indv_7_alpha_8	L2regression	glm7	sc1	sess	True	mdtb4002_wb_indv_7	cerebellum_suit	True	4	crossed	False	8	Wed Nov 24 01:28:02 2021
143	s14	0.3469791655511396	0.3459660960136328	7	0.3722421748031006	0.2616644473417249	ridge_mdtb4002_wb_indv_7_alpha_8	L2regression	glm7	sc1	sess	True	mdtb4002_wb_indv_7	cerebellum_suit	True	4	crossed	False	8	Wed Nov 24 01:28:03 2021
144	s06	0.3251669936635651	0.5750256896905647	7	0.3642899464832791	0.4051905370422871	ridge_mdtb4002_wb_indv_7_alpha_8	L2regression	glm7	sc1	sess	True	mdtb4002_wb_indv_7	cerebellum_suit	True	4	crossed	False	8	Wed Nov 24 01:28:04 2021
145	s22	0.3964023162316352	0.5961385554731057	7	0.4632439498058462	0.4347360651604612	ridge_mdtb4002_wb_indv_7_alpha_8	L2regression	glm7	sc1	sess	True	mdtb4002_wb_indv_7	cerebellum_suit	True	4	crossed	False	8	Wed Nov 24 01:28:05 2021
146	s21	0.37940099569730296	0.28405072480655785	7	0.406250760881242	-0.01745978545682956	ridge_mdtb4002_wb_indv_7_alpha_8	L2regression	glm7	sc1	sess	True	mdtb4002_wb_indv_7	cerebellum_suit	True	4	crossed	False	8	Wed Nov 24 01:28:06 2021
147	s08	0.4215178374672413	0.2863505187467914	7	0.4416322164267605	0.12208187357492299	ridge_mdtb4002_wb_indv_7_alpha_10	L2regression	glm7	sc1	sess	True	mdtb4002_wb_indv_7	cerebellum_suit	True	4	crossed	False	10	Wed Nov 24 01:28:07 2021
148	s26	0.3563306953465998	0.33789605589765304	7	0.38140132674598815	0.1932596985100848	ridge_mdtb4002_wb_indv_7_alpha_10	L2regression	glm7	sc1	sess	True	mdtb4002_wb_indv_7	cerebellum_suit	True	4	crossed	False	10	Wed Nov 24 01:28:09 2021
149	s04	0.3346586376595259	0.3544585577647488	7	0.3724783250595323	0.19546936452077995	ridge_mdtb4002_wb_indv_7_alpha_10	L2regression	glm7	sc1	sess	True	mdtb4002_wb_indv_7	cerebellum_suit	True	4	crossed	False	10	Wed Nov 24 01:28:10 2021
150	s14	0.3505022402491692	0.33972016231849944	7	0.37460824599820464	0.25950800432041715	ridge_mdtb4002_wb_indv_7_alpha_10	L2regression	glm7	sc1	sess	True	mdtb4002_wb_indv_7	cerebellum_suit	True	4	crossed	False	10	Wed Nov 24 01:28:11 2021
151	s06	0.3283571951093597	0.5723664215934329	7	0.3666512256899314	0.4034758890449732	ridge_mdtb4002_wb_indv_7_alpha_10	L2regression	glm7	sc1	sess	True	mdtb4002_wb_indv_7	cerebellum_suit	True	4	crossed	False	10	Wed Nov 24 01:28:12 2021
152	s22	0.4004627938117487	0.5917889101833587	7	0.4666569276057625	0.43151487472074856	ridge_mdtb4002_wb_indv_7_alpha_10	L2regression	glm7	sc1	sess	True	mdtb4002_wb_indv_7	cerebellum_suit	True	4	crossed	False	10	Wed Nov 24 01:28:13 2021
153	s21	0.3808812404237957	0.27464192932736864	7	0.4061184350964937	-0.02034061610378476	ridge_mdtb4002_wb_indv_7_alpha_10	L2regression	glm7	sc1	sess	True	mdtb4002_wb_indv_7	cerebellum_suit	True	4	crossed	False	10	Wed Nov 24 01:28:14 2021
154	s08	0.32440492452861114	0.641865535869652	17	0.543023882914399	0.149884014873183	ridge_mdtb4002_wb_indv_17_alpha_-2	L2regression	glm7	sc1	sess	True	mdtb4002_wb_indv_17	cerebellum_suit	True	4	crossed	False	-2	Wed Nov 24 01:26:09 2021
155	s26	0.25962743210575034	0.6948550596839076	17	0.4273830129691149	0.2744226224546956	ridge_mdtb4002_wb_indv_17_alpha_-2	L2regression	glm7	sc1	sess	True	mdtb4002_wb_indv_17	cerebellum_suit	True	4	crossed	False	-2	Wed Nov 24 01:26:10 2021
156	s04	0.244622540860976	0.6943084558971911	17	0.4491526360977745	0.199214881711469	ridge_mdtb4002_wb_indv_17_alpha_-2	L2regression	glm7	sc1	sess	True	mdtb4002_wb_indv_17	cerebellum_suit	True	4	crossed	False	-2	Wed Nov 24 01:26:11 2021
157	s14	0.2584143366342833	0.6861342010156956	17	0.4365841245485353	0.2040549484509459	ridge_mdtb4002_wb_indv_17_alpha_-2	L2regression	glm7	sc1	sess	True	mdtb4002_wb_indv_17	cerebellum_suit	True	4	crossed	False	-2	Wed Nov 24 01:26:12 2021
158	s06	0.22610278253430485	0.7532235913573978	17	0.38631780532663146	0.3848548352032702	ridge_mdtb4002_wb_indv_17_alpha_-2	L2regression	glm7	sc1	sess	True	mdtb4002_wb_indv_17	cerebellum_suit	True	4	crossed	False	-2	Wed Nov 24 01:26:13 2021
159	s22	0.2803054167143334	0.7578571449088335	17	0.4981299147381876	0.3938431193870907	ridge_mdtb4002_wb_indv_17_alpha_-2	L2regression	glm7	sc1	sess	True	mdtb4002_wb_indv_17	cerebellum_suit	True	4	crossed	False	-2	Wed Nov 24 01:26:14 2021
160	s21	0.29309286580509913	0.6439499212047329	17	0.5731140448990528	0.026163921598462186	ridge_mdtb4002_wb_indv_17_alpha_-2	L2regression	glm7	sc1	sess	True	mdtb4002_wb_indv_17	cerebellum_suit	True	4	crossed	False	-2	Wed Nov 24 01:26:16 2021
161	s08	0.32823340846082444	0.6326222802610307	17	0.5112728802305112	0.16485047934664052	ridge_mdtb4002_wb_indv_17_alpha_0	L2regression	glm7	sc1	sess	True	mdtb4002_wb_indv_17	cerebellum_suit	True	4	crossed	False	0	Wed Nov 24 01:26:17 2021
162	s26	0.26088889558138795	0.6919727615145753	17	0.4102283825719019	0.2838188999595769	ridge_mdtb4002_wb_indv_17_alpha_0	L2regression	glm7	sc1	sess	True	mdtb4002_wb_indv_17	cerebellum_suit	True	4	crossed	False	0	Wed Nov 24 01:26:18 2021
163	s04	0.2474081069171048	0.687141003382863	17	0.422367863372216	0.2123760753807616	ridge_mdtb4002_wb_indv_17_alpha_0	L2regression	glm7	sc1	sess	True	mdtb4002_wb_indv_17	cerebellum_suit	True	4	crossed	False	0	Wed Nov 24 01:26:19 2021
164	s14	0.26524069711205506	0.6670096942404894	17	0.4100976036486	0.2240160544735184	ridge_mdtb4002_wb_indv_17_alpha_0	L2regression	glm7	sc1	sess	True	mdtb4002_wb_indv_17	cerebellum_suit	True	4	crossed	False	0	Wed Nov 24 01:26:20 2021
165	s06	0.22737031865327184	0.7503923412709476	17	0.37384239696730825	0.400981783578622	ridge_mdtb4002_wb_indv_17_alpha_0	L2regression	glm7	sc1	sess	True	mdtb4002_wb_indv_17	cerebellum_suit	True	4	crossed	False	0	Wed Nov 24 01:26:21 2021
166	s22	0.2816300073297152	0.7555456983817667	17	0.481047505862779	0.410254113778235	ridge_mdtb4002_wb_indv_17_alpha_0	L2regression	glm7	sc1	sess	True	mdtb4002_wb_indv_17	cerebellum_suit	True	4	crossed	False	0	Wed Nov 24 01:26:23 2021
167	s21	0.2956324104551861	0.637123087471946	17	0.5336041418569555	0.025747582769485185	ridge_mdtb4002_wb_indv_17_alpha_0	L2regression	glm7	sc1	sess	True	mdtb4002_wb_indv_17	cerebellum_suit	True	4	crossed	False	0	Wed Nov 24 01:26:24 2021
168	s08	0.3435790978291304	0.5941583918596847	17	0.4726626886919088	0.18380608663222264	ridge_mdtb4002_wb_indv_17_alpha_2	L2regression	glm7	sc1	sess	True	mdtb4002_wb_indv_17	cerebellum_suit	True	4	crossed	False	2	Wed Nov 24 01:26:25 2021
169	s26	0.27062629210038297	0.669318184153489	17	0.3835200812632997	0.2936721749314751	ridge_mdtb4002_wb_indv_17_alpha_2	L2regression	glm7	sc1	sess	True	mdtb4002_wb_indv_17	cerebellum_suit	True	4	crossed	False	2	Wed Nov 24 01:26:26 2021
170	s04	0.26217326055013146	0.6436175837855328	17	0.3927524557216277	0.22383032420780927	ridge_mdtb4002_wb_indv_17_alpha_2	L2regression	glm7	sc1	sess	True	mdtb4002_wb_indv_17	cerebellum_suit	True	4	crossed	False	2	Wed Nov 24 01:26:27 2021
171	s14	0.28040116838048657	0.6204402749562751	17	0.3796639227977973	0.26237508563994605	ridge_mdtb4002_wb_indv_17_alpha_2	L2regression	glm7	sc1	sess	True	mdtb4002_wb_indv_17	cerebellum_suit	True	4	crossed	False	2	Wed Nov 24 01:26:28 2021
172	s06	0.23567898268269194	0.7313582318115912	17	0.35141942179822083	0.4256148893355432	ridge_mdtb4002_wb_indv_17_alpha_2	L2regression	glm7	sc1	sess	True	mdtb4002_wb_indv_17	cerebellum_suit	True	4	crossed	False	2	Wed Nov 24 01:26:29 2021
173	s22	0.29026332480521944	0.7401413893393476	17	0.4440024910808601	0.4494194030557101	ridge_mdtb4002_wb_indv_17_alpha_2	L2regression	glm7	sc1	sess	True	mdtb4002_wb_indv_17	cerebellum_suit	True	4	crossed	False	2	Wed Nov 24 01:26:31 2021
174	s21	0.3082094752900157	0.6016898856162838	17	0.4708173222218522	0.040960253364241854	ridge_mdtb4002_wb_indv_17_alpha_2	L2regression	glm7	sc1	sess	True	mdtb4002_wb_indv_17	cerebellum_suit	True	4	crossed	False	2	Wed Nov 24 01:26:32 2021
175	s08	0.3717347126418081	0.5165025489043051	17	0.4461820937260057	0.18178581585349485	ridge_mdtb4002_wb_indv_17_alpha_4	L2regression	glm7	sc1	sess	True	mdtb4002_wb_indv_17	cerebellum_suit	True	4	crossed	False	4	Wed Nov 24 01:26:33 2021
176	s26	0.2975020352997261	0.6075443468599498	17	0.3671469612289899	0.2842753368180955	ridge_mdtb4002_wb_indv_17_alpha_4	L2regression	glm7	sc1	sess	True	mdtb4002_wb_indv_17	cerebellum_suit	True	4	crossed	False	4	Wed Nov 24 01:26:34 2021
177	s04	0.2857807323745376	0.5679933259755195	17	0.36748202245560296	0.2441057379958372	ridge_mdtb4002_wb_indv_17_alpha_4	L2regression	glm7	sc1	sess	True	mdtb4002_wb_indv_17	cerebellum_suit	True	4	crossed	False	4	Wed Nov 24 01:26:35 2021
178	s14	0.3025551295817496	0.543986020314637	17	0.35992462302544953	0.2962264574192554	ridge_mdtb4002_wb_indv_17_alpha_4	L2regression	glm7	sc1	sess	True	mdtb4002_wb_indv_17	cerebellum_suit	True	4	crossed	False	4	Wed Nov 24 01:26:36 2021
179	s06	0.2574172195869123	0.6839228965129261	17	0.3324401702609123	0.43721116557001294	ridge_mdtb4002_wb_indv_17_alpha_4	L2regression	glm7	sc1	sess	True	mdtb4002_wb_indv_17	cerebellum_suit	True	4	crossed	False	4	Wed Nov 24 01:26:37 2021
180	s22	0.31472846906407265	0.7004326260273243	17	0.4130565594097755	0.4815651639438758	ridge_mdtb4002_wb_indv_17_alpha_4	L2regression	glm7	sc1	sess	True	mdtb4002_wb_indv_17	cerebellum_suit	True	4	crossed	False	4	Wed Nov 24 01:26:39 2021
181	s21	0.333344114860853	0.5331412995039577	17	0.4213643476544749	0.0532612083085826	ridge_mdtb4002_wb_indv_17_alpha_4	L2regression	glm7	sc1	sess	True	mdtb4002_wb_indv_17	cerebellum_suit	True	4	crossed	False	4	Wed Nov 24 01:26:40 2021
182	s08	0.4016405953070623	0.4114257522865328	17	0.4395456270972792	0.15682607134971424	ridge_mdtb4002_wb_indv_17_alpha_6	L2regression	glm7	sc1	sess	True	mdtb4002_wb_indv_17	cerebellum_suit	True	4	crossed	False	6	Wed Nov 24 01:26:41 2021
183	s26	0.3330403977501673	0.5022987183083911	17	0.3718856148598425	0.24386550438613544	ridge_mdtb4002_wb_indv_17_alpha_6	L2regression	glm7	sc1	sess	True	mdtb4002_wb_indv_17	cerebellum_suit	True	4	crossed	False	6	Wed Nov 24 01:26:42 2021
184	s04	0.3128628349040772	0.466959949227058	17	0.3637937170052221	0.2303836795384603	ridge_mdtb4002_wb_indv_17_alpha_6	L2regression	glm7	sc1	sess	True	mdtb4002_wb_indv_17	cerebellum_suit	True	4	crossed	False	6	Wed Nov 24 01:26:43 2021
185	s14	0.3262980906241035	0.4357622759958383	17	0.36091274691955616	0.2841025779235539	ridge_mdtb4002_wb_indv_17_alpha_6	L2regression	glm7	sc1	sess	True	mdtb4002_wb_indv_17	cerebellum_suit	True	4	crossed	False	6	Wed Nov 24 01:26:44 2021
186	s06	0.29448653876826225	0.6221226310824559	17	0.3439044559424521	0.41320022419664826	ridge_mdtb4002_wb_indv_17_alpha_6	L2regression	glm7	sc1	sess	True	mdtb4002_wb_indv_17	cerebellum_suit	True	4	crossed	False	6	Wed Nov 24 01:26:45 2021
187	s22	0.35944784352954673	0.6498875068504602	17	0.43350339564400986	0.4636370307553946	ridge_mdtb4002_wb_indv_17_alpha_6	L2regression	glm7	sc1	sess	True	mdtb4002_wb_indv_17	cerebellum_suit	True	4	crossed	False	6	Wed Nov 24 01:26:46 2021
188	s21	0.3628909796015672	0.4280212654444161	17	0.408205550027666	0.020225621637767626	ridge_mdtb4002_wb_indv_17_alpha_6	L2regression	glm7	sc1	sess	True	mdtb4002_wb_indv_17	cerebellum_suit	True	4	crossed	False	6	Wed Nov 24 01:26:48 2021
189	s08	0.4170956328345722	0.3200165624774741	17	0.4407655494398288	0.12323799709466254	ridge_mdtb4002_wb_indv_17_alpha_8	L2regression	glm7	sc1	sess	True	mdtb4002_wb_indv_17	cerebellum_suit	True	4	crossed	False	8	Wed Nov 24 01:26:49 2021
190	s26	0.3513768606331117	0.4038295828784454	17	0.3790711341862457	0.20893869681022054	ridge_mdtb4002_wb_indv_17_alpha_8	L2regression	glm7	sc1	sess	True	mdtb4002_wb_indv_17	cerebellum_suit	True	4	crossed	False	8	Wed Nov 24 01:26:50 2021
191	s04	0.3293397971435072	0.3843278253753471	17	0.3699064026964284	0.20214409597096675	ridge_mdtb4002_wb_indv_17_alpha_8	L2regression	glm7	sc1	sess	True	mdtb4002_wb_indv_17	cerebellum_suit	True	4	crossed	False	8	Wed Nov 24 01:26:51 2021
192	s14	0.34289250029485	0.36307328088430335	17	0.369721749190738	0.26263657095179554	ridge_mdtb4002_wb_indv_17_alpha_8	L2regression	glm7	sc1	sess	True	mdtb4002_wb_indv_17	cerebellum_suit	True	4	crossed	False	8	Wed Nov 24 01:26:52 2021
193	s06	0.3211696389721051	0.5824724982497603	17	0.3617212353534495	0.3885506418350466	ridge_mdtb4002_wb_indv_17_alpha_8	L2regression	glm7	sc1	sess	True	mdtb4002_wb_indv_17	cerebellum_suit	True	4	crossed	False	8	Wed Nov 24 01:26:53 2021
194	s22	0.3918045269759392	0.6078755983878917	17	0.4599177251432433	0.4295099240611202	ridge_mdtb4002_wb_indv_17_alpha_8	L2regression	glm7	sc1	sess	True	mdtb4002_wb_indv_17	cerebellum_suit	True	4	crossed	False	8	Wed Nov 24 01:26:54 2021
195	s21	0.3771419675829384	0.3366369765460703	17	0.4063665108431211	-0.006925285564511864	ridge_mdtb4002_wb_indv_17_alpha_8	L2regression	glm7	sc1	sess	True	mdtb4002_wb_indv_17	cerebellum_suit	True	4	crossed	False	8	Wed Nov 24 01:26:56 2021
196	s08	0.42109093672548464	0.2961013471579799	17	0.44153450211588396	0.11438123773640325	ridge_mdtb4002_wb_indv_17_alpha_10	L2regression	glm7	sc1	sess	True	mdtb4002_wb_indv_17	cerebellum_suit	True	4	crossed	False	10	Wed Nov 24 01:26:57 2021
197	s26	0.35586280276923954	0.3772915814313953	17	0.3811878628792249	0.20053105846973426	ridge_mdtb4002_wb_indv_17_alpha_10	L2regression	glm7	sc1	sess	True	mdtb4002_wb_indv_17	cerebellum_suit	True	4	crossed	False	10	Wed Nov 24 01:26:58 2021
198	s04	0.33413461969913083	0.3629873866952181	17	0.3722239791683002	0.194646423540014	ridge_mdtb4002_wb_indv_17_alpha_10	L2regression	glm7	sc1	sess	True	mdtb4002_wb_indv_17	cerebellum_suit	True	4	crossed	False	10	Wed Nov 24 01:26:59 2021
199	s14	0.3496689426262073	0.3475048146835693	17	0.3740939452599935	0.25780027488968943	ridge_mdtb4002_wb_indv_17_alpha_10	L2regression	glm7	sc1	sess	True	mdtb4002_wb_indv_17	cerebellum_suit	True	4	crossed	False	10	Wed Nov 24 01:27:00 2021
200	s06	0.3277301517962959	0.5725775098481729	17	0.36624733818637545	0.3824336346841149	ridge_mdtb4002_wb_indv_17_alpha_10	L2regression	glm7	sc1	sess	True	mdtb4002_wb_indv_17	cerebellum_suit	True	4	crossed	False	10	Wed Nov 24 01:27:01 2021
201	s22	0.3997369075658368	0.5949756963002376	17	0.4661429350683207	0.41966859140934665	ridge_mdtb4002_wb_indv_17_alpha_10	L2regression	glm7	sc1	sess	True	mdtb4002_wb_indv_17	cerebellum_suit	True	4	crossed	False	10	Wed Nov 24 01:27:02 2021
202	s21	0.3805180238038411	0.3132648779165335	17	0.4061272337910233	-0.012280987399310658	ridge_mdtb4002_wb_indv_17_alpha_10	L2regression	glm7	sc1	sess	True	mdtb4002_wb_indv_17	cerebellum_suit	True	4	crossed	False	10	Wed Nov 24 01:27:03 2021
203	s08	0.3580991967432262	0.5319822568701966	10	0.4899707345189354	0.2044397453737872	ridge_mdtb4002_wb_indv_10_alpha_-2	L2regression	glm7	sc1	sess	True	mdtb4002_wb_indv_10	cerebellum_suit	True	4	crossed	False	-2	Wed Nov 24 01:25:02 2021
204	s26	0.2886934195241553	0.5985408599280294	10	0.4078117296701812	0.2564107635056037	ridge_mdtb4002_wb_indv_10_alpha_-2	L2regression	glm7	sc1	sess	True	mdtb4002_wb_indv_10	cerebellum_suit	True	4	crossed	False	-2	Wed Nov 24 01:25:03 2021
205	s04	0.27730770216469514	0.5769500677489958	10	0.4240831836599153	0.17575625581752924	ridge_mdtb4002_wb_indv_10_alpha_-2	L2regression	glm7	sc1	sess	True	mdtb4002_wb_indv_10	cerebellum_suit	True	4	crossed	False	-2	Wed Nov 24 01:25:05 2021
206	s14	0.2873880128378921	0.5854049641428198	10	0.4025809920719306	0.2382575528761754	ridge_mdtb4002_wb_indv_10_alpha_-2	L2regression	glm7	sc1	sess	True	mdtb4002_wb_indv_10	cerebellum_suit	True	4	crossed	False	-2	Wed Nov 24 01:25:06 2021
207	s06	0.2467997802898433	0.6941691656852704	10	0.37041638133244337	0.4053233146028296	ridge_mdtb4002_wb_indv_10_alpha_-2	L2regression	glm7	sc1	sess	True	mdtb4002_wb_indv_10	cerebellum_suit	True	4	crossed	False	-2	Wed Nov 24 01:25:07 2021
208	s22	0.3040861993584567	0.7089958023548302	10	0.4507871241923576	0.4569481369449178	ridge_mdtb4002_wb_indv_10_alpha_-2	L2regression	glm7	sc1	sess	True	mdtb4002_wb_indv_10	cerebellum_suit	True	4	crossed	False	-2	Wed Nov 24 01:25:08 2021
209	s21	0.32661290971788826	0.5183481470547144	10	0.4995261988881098	0.03562562435830872	ridge_mdtb4002_wb_indv_10_alpha_-2	L2regression	glm7	sc1	sess	True	mdtb4002_wb_indv_10	cerebellum_suit	True	4	crossed	False	-2	Wed Nov 24 01:25:09 2021
210	s08	0.3591332487006961	0.5289756223674235	10	0.4802864571919858	0.2009555415425852	ridge_mdtb4002_wb_indv_10_alpha_0	L2regression	glm7	sc1	sess	True	mdtb4002_wb_indv_10	cerebellum_suit	True	4	crossed	False	0	Wed Nov 24 01:25:11 2021
211	s26	0.28882162830359626	0.5983189370085327	10	0.4013506749616904	0.25866076542450345	ridge_mdtb4002_wb_indv_10_alpha_0	L2regression	glm7	sc1	sess	True	mdtb4002_wb_indv_10	cerebellum_suit	True	4	crossed	False	0	Wed Nov 24 01:25:12 2021
212	s04	0.2780657328367919	0.5741392224972671	10	0.4107571810135359	0.1859510081639797	ridge_mdtb4002_wb_indv_10_alpha_0	L2regression	glm7	sc1	sess	True	mdtb4002_wb_indv_10	cerebellum_suit	True	4	crossed	False	0	Wed Nov 24 01:25:13 2021
213	s14	0.2892568674844569	0.5789790810633944	10	0.38912110875053774	0.2584041299102461	ridge_mdtb4002_wb_indv_10_alpha_0	L2regression	glm7	sc1	sess	True	mdtb4002_wb_indv_10	cerebellum_suit	True	4	crossed	False	0	Wed Nov 24 01:25:14 2021
214	s06	0.2470264337945576	0.6936554597371012	10	0.363259011553146	0.4119035300037749	ridge_mdtb4002_wb_indv_10_alpha_0	L2regression	glm7	sc1	sess	True	mdtb4002_wb_indv_10	cerebellum_suit	True	4	crossed	False	0	Wed Nov 24 01:25:15 2021
215	s22	0.3042426256081567	0.7087269403402958	10	0.4449803141810375	0.4626789273131125	ridge_mdtb4002_wb_indv_10_alpha_0	L2regression	glm7	sc1	sess	True	mdtb4002_wb_indv_10	cerebellum_suit	True	4	crossed	False	0	Wed Nov 24 01:25:16 2021
216	s21	0.32700739095222137	0.5171186241772199	10	0.4857097527236484	0.040395700761585766	ridge_mdtb4002_wb_indv_10_alpha_0	L2regression	glm7	sc1	sess	True	mdtb4002_wb_indv_10	cerebellum_suit	True	4	crossed	False	0	Wed Nov 24 01:25:18 2021
217	s08	0.3662982386145713	0.5067120590968748	10	0.4613879651387074	0.1902334359689664	ridge_mdtb4002_wb_indv_10_alpha_2	L2regression	glm7	sc1	sess	True	mdtb4002_wb_indv_10	cerebellum_suit	True	4	crossed	False	2	Wed Nov 24 01:25:19 2021
218	s26	0.2922201927338153	0.5918841516576027	10	0.3821809606759657	0.2634826778432802	ridge_mdtb4002_wb_indv_10_alpha_2	L2regression	glm7	sc1	sess	True	mdtb4002_wb_indv_10	cerebellum_suit	True	4	crossed	False	2	Wed Nov 24 01:25:20 2021
219	s04	0.28380890882788595	0.5523455990460304	10	0.3861451668219418	0.20833596586210146	ridge_mdtb4002_wb_indv_10_alpha_2	L2regression	glm7	sc1	sess	True	mdtb4002_wb_indv_10	cerebellum_suit	True	4	crossed	False	2	Wed Nov 24 01:25:21 2021
220	s14	0.2963638152485748	0.5544584292680121	10	0.37036166380534025	0.2846133494451801	ridge_mdtb4002_wb_indv_10_alpha_2	L2regression	glm7	sc1	sess	True	mdtb4002_wb_indv_10	cerebellum_suit	True	4	crossed	False	2	Wed Nov 24 01:25:22 2021
221	s06	0.2507861889016592	0.6853492262222944	10	0.34502489604956105	0.42676559055355584	ridge_mdtb4002_wb_indv_10_alpha_2	L2regression	glm7	sc1	sess	True	mdtb4002_wb_indv_10	cerebellum_suit	True	4	crossed	False	2	Wed Nov 24 01:25:23 2021
222	s22	0.307768056754967	0.7027215535099769	10	0.4256704724771859	0.4796356578460419	ridge_mdtb4002_wb_indv_10_alpha_2	L2regression	glm7	sc1	sess	True	mdtb4002_wb_indv_10	cerebellum_suit	True	4	crossed	False	2	Wed Nov 24 01:25:25 2021
223	s21	0.33157319574010463	0.5032578457882341	10	0.4497450963678308	0.04987663259884949	ridge_mdtb4002_wb_indv_10_alpha_2	L2regression	glm7	sc1	sess	True	mdtb4002_wb_indv_10	cerebellum_suit	True	4	crossed	False	2	Wed Nov 24 01:25:26 2021
224	s08	0.3835543007724773	0.463885755024917	10	0.4424419146951348	0.17504435407839786	ridge_mdtb4002_wb_indv_10_alpha_4	L2regression	glm7	sc1	sess	True	mdtb4002_wb_indv_10	cerebellum_suit	True	4	crossed	False	4	Wed Nov 24 01:25:27 2021
225	s26	0.3127412654672125	0.5447190629230112	10	0.36952666824001534	0.2530582860039329	ridge_mdtb4002_wb_indv_10_alpha_4	L2regression	glm7	sc1	sess	True	mdtb4002_wb_indv_10	cerebellum_suit	True	4	crossed	False	4	Wed Nov 24 01:25:28 2021
226	s04	0.2980809063259638	0.5051153431147826	10	0.3660181945554344	0.2262706101064229	ridge_mdtb4002_wb_indv_10_alpha_4	L2regression	glm7	sc1	sess	True	mdtb4002_wb_indv_10	cerebellum_suit	True	4	crossed	False	4	Wed Nov 24 01:25:29 2021
227	s14	0.3118234318564677	0.5008151129483386	10	0.3580304245696285	0.3015722495184533	ridge_mdtb4002_wb_indv_10_alpha_4	L2regression	glm7	sc1	sess	True	mdtb4002_wb_indv_10	cerebellum_suit	True	4	crossed	False	4	Wed Nov 24 01:25:30 2021
228	s06	0.2688006113952254	0.6532198423271256	10	0.33256340667634715	0.4290720758330272	ridge_mdtb4002_wb_indv_10_alpha_4	L2regression	glm7	sc1	sess	True	mdtb4002_wb_indv_10	cerebellum_suit	True	4	crossed	False	4	Wed Nov 24 01:25:31 2021
229	s22	0.3286748390820517	0.6721277413186191	10	0.4126567030724043	0.4853417926180398	ridge_mdtb4002_wb_indv_10_alpha_4	L2regression	glm7	sc1	sess	True	mdtb4002_wb_indv_10	cerebellum_suit	True	4	crossed	False	4	Wed Nov 24 01:25:33 2021
230	s21	0.34801311073964525	0.4557133678210634	10	0.4160263091434186	0.042326975895210686	ridge_mdtb4002_wb_indv_10_alpha_4	L2regression	glm7	sc1	sess	True	mdtb4002_wb_indv_10	cerebellum_suit	True	4	crossed	False	4	Wed Nov 24 01:25:34 2021
231	s08	0.4076936123995752	0.36983041406224576	10	0.4401823456478296	0.13589379175675534	ridge_mdtb4002_wb_indv_10_alpha_6	L2regression	glm7	sc1	sess	True	mdtb4002_wb_indv_10	cerebellum_suit	True	4	crossed	False	6	Wed Nov 24 01:25:35 2021
232	s26	0.3406923023593293	0.4436916613278016	10	0.3746897336211283	0.21807291570209586	ridge_mdtb4002_wb_indv_10_alpha_6	L2regression	glm7	sc1	sess	True	mdtb4002_wb_indv_10	cerebellum_suit	True	4	crossed	False	6	Wed Nov 24 01:25:36 2021
233	s04	0.31928777765706484	0.41841923365395456	10	0.3659314326328608	0.2084183014217671	ridge_mdtb4002_wb_indv_10_alpha_6	L2regression	glm7	sc1	sess	True	mdtb4002_wb_indv_10	cerebellum_suit	True	4	crossed	False	6	Wed Nov 24 01:25:37 2021
234	s14	0.3322426686316805	0.4005777938685241	10	0.3632257548500682	0.2756881361092277	ridge_mdtb4002_wb_indv_10_alpha_6	L2regression	glm7	sc1	sess	True	mdtb4002_wb_indv_10	cerebellum_suit	True	4	crossed	False	6	Wed Nov 24 01:25:38 2021
235	s06	0.30425806162657604	0.6058702947679164	10	0.3508248137957716	0.4006520457619257	ridge_mdtb4002_wb_indv_10_alpha_6	L2regression	glm7	sc1	sess	True	mdtb4002_wb_indv_10	cerebellum_suit	True	4	crossed	False	6	Wed Nov 24 01:25:40 2021
236	s22	0.3704537281889178	0.6201279812745633	10	0.4411555405009047	0.4537702104878668	ridge_mdtb4002_wb_indv_10_alpha_6	L2regression	glm7	sc1	sess	True	mdtb4002_wb_indv_10	cerebellum_suit	True	4	crossed	False	6	Wed Nov 24 01:25:41 2021
237	s21	0.3692030253088776	0.3641864563495205	10	0.40785117875820986	0.003669764817263091	ridge_mdtb4002_wb_indv_10_alpha_6	L2regression	glm7	sc1	sess	True	mdtb4002_wb_indv_10	cerebellum_suit	True	4	crossed	False	6	Wed Nov 24 01:25:42 2021
238	s08	0.4188339807953314	0.3006583278852272	10	0.4411461727366842	0.111397262340603	ridge_mdtb4002_wb_indv_10_alpha_8	L2regression	glm7	sc1	sess	True	mdtb4002_wb_indv_10	cerebellum_suit	True	4	crossed	False	8	Wed Nov 24 01:25:43 2021
239	s26	0.3533615911565815	0.36976675280119065	10	0.3799761877781984	0.19450692578970136	ridge_mdtb4002_wb_indv_10_alpha_8	L2regression	glm7	sc1	sess	True	mdtb4002_wb_indv_10	cerebellum_suit	True	4	crossed	False	8	Wed Nov 24 01:25:44 2021
240	s04	0.3313940866222244	0.35676038081246325	10	0.3709197102288335	0.1878855536250335	ridge_mdtb4002_wb_indv_10_alpha_8	L2regression	glm7	sc1	sess	True	mdtb4002_wb_indv_10	cerebellum_suit	True	4	crossed	False	8	Wed Nov 24 01:25:45 2021
241	s14	0.34579710036245337	0.3485656420135798	10	0.3715452867747919	0.2577444869940212	ridge_mdtb4002_wb_indv_10_alpha_8	L2regression	glm7	sc1	sess	True	mdtb4002_wb_indv_10	cerebellum_suit	True	4	crossed	False	8	Wed Nov 24 01:25:46 2021
242	s06	0.3241383408568198	0.5767317579124018	10	0.3639887216794563	0.37937352500051547	ridge_mdtb4002_wb_indv_10_alpha_8	L2regression	glm7	sc1	sess	True	mdtb4002_wb_indv_10	cerebellum_suit	True	4	crossed	False	8	Wed Nov 24 01:25:47 2021
243	s22	0.3949244653525729	0.5781952960375372	10	0.46214540296180395	0.4235595115454339	ridge_mdtb4002_wb_indv_10_alpha_8	L2regression	glm7	sc1	sess	True	mdtb4002_wb_indv_10	cerebellum_suit	True	4	crossed	False	8	Wed Nov 24 01:25:49 2021
244	s21	0.3786735206591153	0.3012948193515039	10	0.4063015805803861	-0.014111797268600922	ridge_mdtb4002_wb_indv_10_alpha_8	L2regression	glm7	sc1	sess	True	mdtb4002_wb_indv_10	cerebellum_suit	True	4	crossed	False	8	Wed Nov 24 01:25:50 2021
245	s08	0.4213922919945797	0.28603383724190834	10	0.44161244844761904	0.1064071716991258	ridge_mdtb4002_wb_indv_10_alpha_10	L2regression	glm7	sc1	sess	True	mdtb4002_wb_indv_10	cerebellum_suit	True	4	crossed	False	10	Wed Nov 24 01:25:51 2021
246	s26	0.35619050549399417	0.3538399450756669	10	0.3813427013793396	0.1897581870625444	ridge_mdtb4002_wb_indv_10_alpha_10	L2regression	glm7	sc1	sess	True	mdtb4002_wb_indv_10	cerebellum_suit	True	4	crossed	False	10	Wed Nov 24 01:25:52 2021
247	s04	0.33449885018745185	0.34380513126537804	10	0.37240810526899537	0.183502868503032	ridge_mdtb4002_wb_indv_10_alpha_10	L2regression	glm7	sc1	sess	True	mdtb4002_wb_indv_10	cerebellum_suit	True	4	crossed	False	10	Wed Nov 24 01:25:53 2021
248	s14	0.3502805582879296	0.3391518363226426	10	0.3744772608088772	0.2544896610162211	ridge_mdtb4002_wb_indv_10_alpha_10	L2regression	glm7	sc1	sess	True	mdtb4002_wb_indv_10	cerebellum_suit	True	4	crossed	False	10	Wed Nov 24 01:25:54 2021
249	s06	0.32820206852826395	0.5702591723934987	10	0.3666045583739389	0.3748844515628612	ridge_mdtb4002_wb_indv_10_alpha_10	L2regression	glm7	sc1	sess	True	mdtb4002_wb_indv_10	cerebellum_suit	True	4	crossed	False	10	Wed Nov 24 01:25:56 2021
250	s22	0.4002305628235305	0.567700200854306	10	0.466487585395328	0.4165833994692008	ridge_mdtb4002_wb_indv_10_alpha_10	L2regression	glm7	sc1	sess	True	mdtb4002_wb_indv_10	cerebellum_suit	True	4	crossed	False	10	Wed Nov 24 01:25:57 2021
251	s21	0.3807669224398911	0.28800921032624616	10	0.40612250584005455	-0.017123954277297692	ridge_mdtb4002_wb_indv_10_alpha_10	L2regression	glm7	sc1	sess	True	mdtb4002_wb_indv_10	cerebellum_suit	True	4	crossed	False	10	Wed Nov 24 01:25:58 2021
252	s08	0.2918658186792191	0.7232972137343123	25	0.5530458823723015	0.15106683616153693	ridge_mdtb_wb_025_alpha_-2	L2regression	glm7	sc1	sess	True	mdtb_wb_025	cerebellum_suit	True	4	crossed	False	-2	Wed Nov 24 01:23:54 2021
253	s26	0.23993433279719265	0.7456302871313114	25	0.4513873011238168	0.2466048381256261	ridge_mdtb_wb_025_alpha_-2	L2regression	glm7	sc1	sess	True	mdtb_wb_025	cerebellum_suit	True	4	crossed	False	-2	Wed Nov 24 01:23:55 2021
254	s04	0.22294020007278545	0.7549513811609799	25	0.4743754825106683	0.17229072745435664	ridge_mdtb_wb_025_alpha_-2	L2regression	glm7	sc1	sess	True	mdtb_wb_025	cerebellum_suit	True	4	crossed	False	-2	Wed Nov 24 01:23:56 2021
255	s14	0.2305675946956549	0.7609499238853104	25	0.44277640555375786	0.2461696201174819	ridge_mdtb_wb_025_alpha_-2	L2regression	glm7	sc1	sess	True	mdtb_wb_025	cerebellum_suit	True	4	crossed	False	-2	Wed Nov 24 01:23:58 2021
256	s06	0.19813809431113227	0.8182582161493096	25	0.4085376643726668	0.3724515261097664	ridge_mdtb_wb_025_alpha_-2	L2regression	glm7	sc1	sess	True	mdtb_wb_025	cerebellum_suit	True	4	crossed	False	-2	Wed Nov 24 01:23:59 2021
257	s22	0.2480230252506527	0.8180394261806698	25	0.513781200885318	0.4029567503546004	ridge_mdtb_wb_025_alpha_-2	L2regression	glm7	sc1	sess	True	mdtb_wb_025	cerebellum_suit	True	4	crossed	False	-2	Wed Nov 24 01:24:00 2021
258	s21	0.25724540007940805	0.7413008172596075	25	0.5748444840849078	0.04705318616690257	ridge_mdtb_wb_025_alpha_-2	L2regression	glm7	sc1	sess	True	mdtb_wb_025	cerebellum_suit	True	4	crossed	False	-2	Wed Nov 24 01:24:01 2021
259	s08	0.3018152852887171	0.7042381905169397	25	0.5004548998423469	0.19637429160417305	ridge_mdtb_wb_025_alpha_0	L2regression	glm7	sc1	sess	True	mdtb_wb_025	cerebellum_suit	True	4	crossed	False	0	Wed Nov 24 01:24:03 2021
260	s26	0.2460874040609155	0.7318003827684372	25	0.4217306644174039	0.26122376937814146	ridge_mdtb_wb_025_alpha_0	L2regression	glm7	sc1	sess	True	mdtb_wb_025	cerebellum_suit	True	4	crossed	False	0	Wed Nov 24 01:24:04 2021
261	s04	0.2293808066343553	0.7416296991687453	25	0.4285641676374459	0.2003096446293991	ridge_mdtb_wb_025_alpha_0	L2regression	glm7	sc1	sess	True	mdtb_wb_025	cerebellum_suit	True	4	crossed	False	0	Wed Nov 24 01:24:05 2021
262	s14	0.2398311866156561	0.7406560129902428	25	0.4074034425352388	0.2626593939855227	ridge_mdtb_wb_025_alpha_0	L2regression	glm7	sc1	sess	True	mdtb_wb_025	cerebellum_suit	True	4	crossed	False	0	Wed Nov 24 01:24:06 2021
263	s06	0.20372228655073027	0.8075734558637804	25	0.3838498255679275	0.3911026253082041	ridge_mdtb_wb_025_alpha_0	L2regression	glm7	sc1	sess	True	mdtb_wb_025	cerebellum_suit	True	4	crossed	False	0	Wed Nov 24 01:24:07 2021
264	s22	0.25240192997229666	0.8115205216152723	25	0.476855109603137	0.4378821621013994	ridge_mdtb_wb_025_alpha_0	L2regression	glm7	sc1	sess	True	mdtb_wb_025	cerebellum_suit	True	4	crossed	False	0	Wed Nov 24 01:24:08 2021
265	s21	0.26383309498443275	0.7290919489789532	25	0.5096490427845463	0.05580012225233733	ridge_mdtb_wb_025_alpha_0	L2regression	glm7	sc1	sess	True	mdtb_wb_025	cerebellum_suit	True	4	crossed	False	0	Wed Nov 24 01:24:10 2021
266	s08	0.3296647393649912	0.6421019379879428	25	0.4586397387787231	0.2269995934458111	ridge_mdtb_wb_025_alpha_2	L2regression	glm7	sc1	sess	True	mdtb_wb_025	cerebellum_suit	True	4	crossed	False	2	Wed Nov 24 01:24:11 2021
267	s26	0.2641555624852944	0.6887599137256386	25	0.3891041947706744	0.2767150540638982	ridge_mdtb_wb_025_alpha_2	L2regression	glm7	sc1	sess	True	mdtb_wb_025	cerebellum_suit	True	4	crossed	False	2	Wed Nov 24 01:24:12 2021
268	s04	0.25297046830950154	0.6828224177462743	25	0.3888140104600806	0.22291281736519253	ridge_mdtb_wb_025_alpha_2	L2regression	glm7	sc1	sess	True	mdtb_wb_025	cerebellum_suit	True	4	crossed	False	2	Wed Nov 24 01:24:13 2021
269	s14	0.2628851174579248	0.681913585178096	25	0.3789362751340854	0.2822263717418351	ridge_mdtb_wb_025_alpha_2	L2regression	glm7	sc1	sess	True	mdtb_wb_025	cerebellum_suit	True	4	crossed	False	2	Wed Nov 24 01:24:14 2021
270	s06	0.2225906259060532	0.7669742368562064	25	0.3578183871210656	0.41180364561245536	ridge_mdtb_wb_025_alpha_2	L2regression	glm7	sc1	sess	True	mdtb_wb_025	cerebellum_suit	True	4	crossed	False	2	Wed Nov 24 01:24:15 2021
271	s22	0.27023781686559234	0.7829977369190516	25	0.4352927869406819	0.4812927521469707	ridge_mdtb_wb_025_alpha_2	L2regression	glm7	sc1	sess	True	mdtb_wb_025	cerebellum_suit	True	4	crossed	False	2	Wed Nov 24 01:24:17 2021
272	s21	0.2904980634057518	0.6674417781212902	25	0.4543230062219155	0.0690079155159754	ridge_mdtb_wb_025_alpha_2	L2regression	glm7	sc1	sess	True	mdtb_wb_025	cerebellum_suit	True	4	crossed	False	2	Wed Nov 24 01:24:18 2021
273	s08	0.3668334083218677	0.5440860341109157	25	0.43901453036638816	0.2180775675070452	ridge_mdtb_wb_025_alpha_4	L2regression	glm7	sc1	sess	True	mdtb_wb_025	cerebellum_suit	True	4	crossed	False	4	Wed Nov 24 01:24:19 2021
274	s26	0.2945194313908581	0.6123266273603056	25	0.3695140626264105	0.27563901086980874	ridge_mdtb_wb_025_alpha_4	L2regression	glm7	sc1	sess	True	mdtb_wb_025	cerebellum_suit	True	4	crossed	False	4	Wed Nov 24 01:24:20 2021
275	s04	0.28529642814838563	0.5753174227098511	25	0.3665218669056393	0.2374427809081159	ridge_mdtb_wb_025_alpha_4	L2regression	glm7	sc1	sess	True	mdtb_wb_025	cerebellum_suit	True	4	crossed	False	4	Wed Nov 24 01:24:21 2021
276	s14	0.2923823026527822	0.5920619956461871	25	0.35917054514712193	0.30815825314171585	ridge_mdtb_wb_025_alpha_4	L2regression	glm7	sc1	sess	True	mdtb_wb_025	cerebellum_suit	True	4	crossed	False	4	Wed Nov 24 01:24:22 2021
277	s06	0.2507773199456666	0.7021683402896539	25	0.3352882038806884	0.42698753567628794	ridge_mdtb_wb_025_alpha_4	L2regression	glm7	sc1	sess	True	mdtb_wb_025	cerebellum_suit	True	4	crossed	False	4	Wed Nov 24 01:24:24 2021
278	s22	0.3044284540041084	0.7239069121869428	25	0.4096559197996984	0.5010672104878041	ridge_mdtb_wb_025_alpha_4	L2regression	glm7	sc1	sess	True	mdtb_wb_025	cerebellum_suit	True	4	crossed	False	4	Wed Nov 24 01:24:25 2021
279	s21	0.32678210674488245	0.5655002618169195	25	0.4193071542353695	0.07228819531006646	ridge_mdtb_wb_025_alpha_4	L2regression	glm7	sc1	sess	True	mdtb_wb_025	cerebellum_suit	True	4	crossed	False	4	Wed Nov 24 01:24:26 2021
280	s08	0.4004968177785483	0.4061903226402643	25	0.43949069936578655	0.16082923425647666	ridge_mdtb_wb_025_alpha_6	L2regression	glm7	sc1	sess	True	mdtb_wb_025	cerebellum_suit	True	4	crossed	False	6	Wed Nov 24 01:24:27 2021
281	s26	0.3300414124920113	0.5027702434370759	25	0.3712746999576604	0.24272567832044986	ridge_mdtb_wb_025_alpha_6	L2regression	glm7	sc1	sess	True	mdtb_wb_025	cerebellum_suit	True	4	crossed	False	6	Wed Nov 24 01:24:28 2021
282	s04	0.3124830732240101	0.4471570610351217	25	0.36407772382230497	0.21647431355447347	ridge_mdtb_wb_025_alpha_6	L2regression	glm7	sc1	sess	True	mdtb_wb_025	cerebellum_suit	True	4	crossed	False	6	Wed Nov 24 01:24:29 2021
283	s14	0.32167925980753537	0.4660664758406241	25	0.3593689928814364	0.2942846913413978	ridge_mdtb_wb_025_alpha_6	L2regression	glm7	sc1	sess	True	mdtb_wb_025	cerebellum_suit	True	4	crossed	False	6	Wed Nov 24 01:24:30 2021
284	s06	0.2886725017903999	0.6310313994505773	25	0.341412262108412	0.4070580355470863	ridge_mdtb_wb_025_alpha_6	L2regression	glm7	sc1	sess	True	mdtb_wb_025	cerebellum_suit	True	4	crossed	False	6	Wed Nov 24 01:24:32 2021
285	s22	0.3513314855998341	0.6574348603910896	25	0.4257988317138595	0.4798377265410229	ridge_mdtb_wb_025_alpha_6	L2regression	glm7	sc1	sess	True	mdtb_wb_025	cerebellum_suit	True	4	crossed	False	6	Wed Nov 24 01:24:33 2021
286	s21	0.3600120842695381	0.4376721170324184	25	0.4085283736778285	0.03266054831148117	ridge_mdtb_wb_025_alpha_6	L2regression	glm7	sc1	sess	True	mdtb_wb_025	cerebellum_suit	True	4	crossed	False	6	Wed Nov 24 01:24:34 2021
287	s08	0.416155660605284	0.27566481873335474	25	0.4408435979876196	0.10935754466610864	ridge_mdtb_wb_025_alpha_8	L2regression	glm7	sc1	sess	True	mdtb_wb_025	cerebellum_suit	True	4	crossed	False	8	Wed Nov 24 01:24:35 2021
288	s26	0.35000234007207953	0.3779896168218127	25	0.3784536643485016	0.19783033320235266	ridge_mdtb_wb_025_alpha_8	L2regression	glm7	sc1	sess	True	mdtb_wb_025	cerebellum_suit	True	4	crossed	False	8	Wed Nov 24 01:24:36 2021
289	s04	0.3280054567096319	0.3372276071701597	25	0.36923458503227397	0.1761200338599717	ridge_mdtb_wb_025_alpha_8	L2regression	glm7	sc1	sess	True	mdtb_wb_025	cerebellum_suit	True	4	crossed	False	8	Wed Nov 24 01:24:37 2021
290	s14	0.3405954193425155	0.3686037350482309	25	0.3682841107738116	0.2641291123449599	ridge_mdtb_wb_025_alpha_8	L2regression	glm7	sc1	sess	True	mdtb_wb_025	cerebellum_suit	True	4	crossed	False	8	Wed Nov 24 01:24:38 2021
291	s06	0.3187655388678243	0.5698693947792364	25	0.3603808638715816	0.3681793251904618	ridge_mdtb_wb_025_alpha_8	L2regression	glm7	sc1	sess	True	mdtb_wb_025	cerebellum_suit	True	4	crossed	False	8	Wed Nov 24 01:24:40 2021
292	s22	0.3884378355382481	0.5940589983942026	25	0.4567643253702655	0.4341090815786668	ridge_mdtb_wb_025_alpha_8	L2regression	glm7	sc1	sess	True	mdtb_wb_025	cerebellum_suit	True	4	crossed	False	8	Wed Nov 24 01:24:41 2021
293	s21	0.3760204151879871	0.3115208113439151	25	0.4065525947060324	-0.0032201764203350328	ridge_mdtb_wb_025_alpha_8	L2regression	glm7	sc1	sess	True	mdtb_wb_025	cerebellum_suit	True	4	crossed	False	8	Wed Nov 24 01:24:42 2021
294	s08	0.4208100947517604	0.2437688263990808	25	0.4414895914872472	0.09754859593530588	ridge_mdtb_wb_025_alpha_10	L2regression	glm7	sc1	sess	True	mdtb_wb_025	cerebellum_suit	True	4	crossed	False	10	Wed Nov 24 01:24:43 2021
295	s26	0.35556546457699023	0.33937835348807016	25	0.38104242194482457	0.1852597553941157	ridge_mdtb_wb_025_alpha_10	L2regression	glm7	sc1	sess	True	mdtb_wb_025	cerebellum_suit	True	4	crossed	False	10	Wed Nov 24 01:24:44 2021
296	s04	0.333735572800909	0.3079365931432148	25	0.3720129792357558	0.16508297729478633	ridge_mdtb_wb_025_alpha_10	L2regression	glm7	sc1	sess	True	mdtb_wb_025	cerebellum_suit	True	4	crossed	False	10	Wed Nov 24 01:24:45 2021
297	s14	0.34907590254294524	0.34596403266394155	25	0.3737175528341406	0.2567861309989794	ridge_mdtb_wb_025_alpha_10	L2regression	glm7	sc1	sess	True	mdtb_wb_025	cerebellum_suit	True	4	crossed	False	10	Wed Nov 24 01:24:47 2021
298	s06	0.3272974016408131	0.5481541356120877	25	0.3660072364631449	0.3549563925790888	ridge_mdtb_wb_025_alpha_10	L2regression	glm7	sc1	sess	True	mdtb_wb_025	cerebellum_suit	True	4	crossed	False	10	Wed Nov 24 01:24:48 2021
299	s22	0.3991271619426161	0.5693464366756303	25	0.4656046115161021	0.4177052582406252	ridge_mdtb_wb_025_alpha_10	L2regression	glm7	sc1	sess	True	mdtb_wb_025	cerebellum_suit	True	4	crossed	False	10	Wed Nov 24 01:24:49 2021
300	s21	0.3802759540187444	0.276417456726461	25	0.4061415433797517	-0.010552470944808285	ridge_mdtb_wb_025_alpha_10	L2regression	glm7	sc1	sess	True	mdtb_wb_025	cerebellum_suit	True	4	crossed	False	10	Wed Nov 24 01:24:50 2021
301	s08	0.3701193269295289	0.4845678367690607	7	0.4655959446662859	0.22430712629636704	ridge_mdtb_wb_007_alpha_-2	L2regression	glm7	sc1	sess	True	mdtb_wb_007	cerebellum_suit	True	4	crossed	False	-2	Wed Nov 24 01:22:41 2021
302	s26	0.31193207860295713	0.5001002629523319	7	0.3963782041046811	0.21676896668829365	ridge_mdtb_wb_007_alpha_-2	L2regression	glm7	sc1	sess	True	mdtb_wb_007	cerebellum_suit	True	4	crossed	False	-2	Wed Nov 24 01:22:43 2021
303	s04	0.2945283343869066	0.4981319912726161	7	0.3953979969425658	0.18599978042598167	ridge_mdtb_wb_007_alpha_-2	L2regression	glm7	sc1	sess	True	mdtb_wb_007	cerebellum_suit	True	4	crossed	False	-2	Wed Nov 24 01:22:44 2021
304	s14	0.29997604244027143	0.5337962343679747	7	0.3713592904813425	0.3072441913024033	ridge_mdtb_wb_007_alpha_-2	L2regression	glm7	sc1	sess	True	mdtb_wb_007	cerebellum_suit	True	4	crossed	False	-2	Wed Nov 24 01:22:45 2021
305	s06	0.2641369293629325	0.6380685614117249	7	0.3555836929548595	0.4124746968220205	ridge_mdtb_wb_007_alpha_-2	L2regression	glm7	sc1	sess	True	mdtb_wb_007	cerebellum_suit	True	4	crossed	False	-2	Wed Nov 24 01:22:47 2021
306	s22	0.3288751939864413	0.6435001338202253	7	0.4408642304400303	0.4526354888508133	ridge_mdtb_wb_007_alpha_-2	L2regression	glm7	sc1	sess	True	mdtb_wb_007	cerebellum_suit	True	4	crossed	False	-2	Wed Nov 24 01:22:48 2021
307	s21	0.34413314008754153	0.4318813332329292	7	0.4440527281627736	0.0744921648010097	ridge_mdtb_wb_007_alpha_-2	L2regression	glm7	sc1	sess	True	mdtb_wb_007	cerebellum_suit	True	4	crossed	False	-2	Wed Nov 24 01:22:50 2021
308	s08	0.3705807654622969	0.4835869081313719	7	0.4582084108467532	0.2252271662834085	ridge_mdtb_wb_007_alpha_0	L2regression	glm7	sc1	sess	True	mdtb_wb_007	cerebellum_suit	True	4	crossed	False	0	Wed Nov 24 01:22:51 2021
309	s26	0.312044200005882	0.4998301890426236	7	0.3919608314309037	0.2204577950457499	ridge_mdtb_wb_007_alpha_0	L2regression	glm7	sc1	sess	True	mdtb_wb_007	cerebellum_suit	True	4	crossed	False	0	Wed Nov 24 01:22:52 2021
310	s04	0.2946899024330205	0.4976695647310591	7	0.3898555966118154	0.19056047157334216	ridge_mdtb_wb_007_alpha_0	L2regression	glm7	sc1	sess	True	mdtb_wb_007	cerebellum_suit	True	4	crossed	False	0	Wed Nov 24 01:22:53 2021
311	s14	0.3003922540667168	0.5325691198138001	7	0.3661001125910863	0.3133816909034993	ridge_mdtb_wb_007_alpha_0	L2regression	glm7	sc1	sess	True	mdtb_wb_007	cerebellum_suit	True	4	crossed	False	0	Wed Nov 24 01:22:55 2021
312	s06	0.2642312170959705	0.6378535193975468	7	0.3516437100136135	0.4162427012853144	ridge_mdtb_wb_007_alpha_0	L2regression	glm7	sc1	sess	True	mdtb_wb_007	cerebellum_suit	True	4	crossed	False	0	Wed Nov 24 01:22:56 2021
313	s22	0.3290086038942474	0.6432054930500183	7	0.4368459229344015	0.4555191483997205	ridge_mdtb_wb_007_alpha_0	L2regression	glm7	sc1	sess	True	mdtb_wb_007	cerebellum_suit	True	4	crossed	False	0	Wed Nov 24 01:22:57 2021
314	s21	0.3442349039389669	0.4316456942438968	7	0.439480878682072	0.07488683295967748	ridge_mdtb_wb_007_alpha_0	L2regression	glm7	sc1	sess	True	mdtb_wb_007	cerebellum_suit	True	4	crossed	False	0	Wed Nov 24 01:22:58 2021
315	s08	0.3772696291025779	0.4669675139313745	7	0.444858410100924	0.21746636839478706	ridge_mdtb_wb_007_alpha_2	L2regression	glm7	sc1	sess	True	mdtb_wb_007	cerebellum_suit	True	4	crossed	False	2	Wed Nov 24 01:23:00 2021
316	s26	0.3147279267305608	0.492599353740546	7	0.3793801597856084	0.2295682942356312	ridge_mdtb_wb_007_alpha_2	L2regression	glm7	sc1	sess	True	mdtb_wb_007	cerebellum_suit	True	4	crossed	False	2	Wed Nov 24 01:23:01 2021
317	s04	0.29787213115779154	0.4870022999601246	7	0.37438783930930186	0.20419384365344068	ridge_mdtb_wb_007_alpha_2	L2regression	glm7	sc1	sess	True	mdtb_wb_007	cerebellum_suit	True	4	crossed	False	2	Wed Nov 24 01:23:02 2021
318	s14	0.3060175906260472	0.5125523422129634	7	0.35826252178800866	0.31926356521306265	ridge_mdtb_wb_007_alpha_2	L2regression	glm7	sc1	sess	True	mdtb_wb_007	cerebellum_suit	True	4	crossed	False	2	Wed Nov 24 01:23:04 2021
319	s06	0.2665089337211728	0.6327238235089252	7	0.33974938214725786	0.42529025520888025	ridge_mdtb_wb_007_alpha_2	L2regression	glm7	sc1	sess	True	mdtb_wb_007	cerebellum_suit	True	4	crossed	False	2	Wed Nov 24 01:23:05 2021
320	s22	0.331547739076888	0.6378873726411286	7	0.4243627633268912	0.4637890138426968	ridge_mdtb_wb_007_alpha_2	L2regression	glm7	sc1	sess	True	mdtb_wb_007	cerebellum_suit	True	4	crossed	False	2	Wed Nov 24 01:23:06 2021
321	s21	0.3466671105152701	0.42532056417314135	7	0.4246374714783832	0.07105538071935948	ridge_mdtb_wb_007_alpha_2	L2regression	glm7	sc1	sess	True	mdtb_wb_007	cerebellum_suit	True	4	crossed	False	2	Wed Nov 24 01:23:08 2021
322	s08	0.39735877202346026	0.39515107309526	7	0.4401121893715586	0.1809310411062299	ridge_mdtb_wb_007_alpha_4	L2regression	glm7	sc1	sess	True	mdtb_wb_007	cerebellum_suit	True	4	crossed	False	4	Wed Nov 24 01:23:09 2021
323	s26	0.32867140096851205	0.448037719256486	7	0.3723806592249166	0.22226791004475407	ridge_mdtb_wb_007_alpha_4	L2regression	glm7	sc1	sess	True	mdtb_wb_007	cerebellum_suit	True	4	crossed	False	4	Wed Nov 24 01:23:10 2021
324	s04	0.31086108266522217	0.4269461182593273	7	0.3655741250071362	0.20384052296822885	ridge_mdtb_wb_007_alpha_4	L2regression	glm7	sc1	sess	True	mdtb_wb_007	cerebellum_suit	True	4	crossed	False	4	Wed Nov 24 01:23:11 2021
325	s14	0.3207751627355425	0.4463925308429696	7	0.3575484050518641	0.3034562645736332	ridge_mdtb_wb_007_alpha_4	L2regression	glm7	sc1	sess	True	mdtb_wb_007	cerebellum_suit	True	4	crossed	False	4	Wed Nov 24 01:23:13 2021
326	s06	0.2817211098225175	0.6012374049527284	7	0.33524709870954905	0.4138493329794878	ridge_mdtb_wb_007_alpha_4	L2regression	glm7	sc1	sess	True	mdtb_wb_007	cerebellum_suit	True	4	crossed	False	4	Wed Nov 24 01:23:14 2021
327	s22	0.3464687293620713	0.6148635694827965	7	0.41684792034159945	0.467257082683286	ridge_mdtb_wb_007_alpha_4	L2regression	glm7	sc1	sess	True	mdtb_wb_007	cerebellum_suit	True	4	crossed	False	4	Wed Nov 24 01:23:15 2021
328	s21	0.3592510412535162	0.3814761099657907	7	0.4118530185550725	0.035225748691733116	ridge_mdtb_wb_007_alpha_4	L2regression	glm7	sc1	sess	True	mdtb_wb_007	cerebellum_suit	True	4	crossed	False	4	Wed Nov 24 01:23:16 2021
329	s08	0.4135428755108523	0.2655511214169691	7	0.4409576858655633	0.12220633301867735	ridge_mdtb_wb_007_alpha_6	L2regression	glm7	sc1	sess	True	mdtb_wb_007	cerebellum_suit	True	4	crossed	False	6	Wed Nov 24 01:23:17 2021
330	s26	0.3464220415575785	0.3573006638417656	7	0.3766597440923458	0.19077337228294927	ridge_mdtb_wb_007_alpha_6	L2regression	glm7	sc1	sess	True	mdtb_wb_007	cerebellum_suit	True	4	crossed	False	6	Wed Nov 24 01:23:19 2021
331	s04	0.3249706092131027	0.3328818162145193	7	0.3680966917706697	0.17131751776686555	ridge_mdtb_wb_007_alpha_6	L2regression	glm7	sc1	sess	True	mdtb_wb_007	cerebellum_suit	True	4	crossed	False	6	Wed Nov 24 01:23:20 2021
332	s14	0.3360845841929578	0.35891523452201746	7	0.3645503653532167	0.2667919182772042	ridge_mdtb_wb_007_alpha_6	L2regression	glm7	sc1	sess	True	mdtb_wb_007	cerebellum_suit	True	4	crossed	False	6	Wed Nov 24 01:23:21 2021
333	s06	0.3103265623855539	0.552449762006353	7	0.3528804931844101	0.3794221658239061	ridge_mdtb_wb_007_alpha_6	L2regression	glm7	sc1	sess	True	mdtb_wb_007	cerebellum_suit	True	4	crossed	False	6	Wed Nov 24 01:23:23 2021
334	s22	0.3787639648223549	0.5700025606249552	7	0.4441839651382429	0.4386309865472576	ridge_mdtb_wb_007_alpha_6	L2regression	glm7	sc1	sess	True	mdtb_wb_007	cerebellum_suit	True	4	crossed	False	6	Wed Nov 24 01:23:24 2021
335	s21	0.3736280063492665	0.2868586955224762	7	0.4079627700194267	-0.01610792840308308	ridge_mdtb_wb_007_alpha_6	L2regression	glm7	sc1	sess	True	mdtb_wb_007	cerebellum_suit	True	4	crossed	False	6	Wed Nov 24 01:23:25 2021
336	s08	0.4198393189474063	0.2202595513267237	7	0.4412646952282333	0.10330573506527864	ridge_mdtb_wb_007_alpha_8	L2regression	glm7	sc1	sess	True	mdtb_wb_007	cerebellum_suit	True	4	crossed	False	8	Wed Nov 24 01:23:26 2021
337	s26	0.3545185981270969	0.3059604074366542	7	0.3804541692101727	0.17353933955323084	ridge_mdtb_wb_007_alpha_8	L2regression	glm7	sc1	sess	True	mdtb_wb_007	cerebellum_suit	True	4	crossed	False	8	Wed Nov 24 01:23:28 2021
338	s04	0.332623114952461	0.2886776482264947	7	0.3714691314416485	0.15409362116086844	ridge_mdtb_wb_007_alpha_8	L2regression	glm7	sc1	sess	True	mdtb_wb_007	cerebellum_suit	True	4	crossed	False	8	Wed Nov 24 01:23:29 2021
339	s14	0.3469702813620821	0.32723472771549983	7	0.3721627729092559	0.253674902998418	ridge_mdtb_wb_007_alpha_8	L2regression	glm7	sc1	sess	True	mdtb_wb_007	cerebellum_suit	True	4	crossed	False	8	Wed Nov 24 01:23:30 2021
340	s06	0.3253621298962406	0.5302940265671695	7	0.3643858983915436	0.3639215357070095	ridge_mdtb_wb_007_alpha_8	L2regression	glm7	sc1	sess	True	mdtb_wb_007	cerebellum_suit	True	4	crossed	False	8	Wed Nov 24 01:23:32 2021
341	s22	0.3967391997253008	0.5409292790033146	7	0.4628045270249965	0.4186043480405098	ridge_mdtb_wb_007_alpha_8	L2regression	glm7	sc1	sess	True	mdtb_wb_007	cerebellum_suit	True	4	crossed	False	8	Wed Nov 24 01:23:33 2021
342	s21	0.3795535746255253	0.23823428527089305	7	0.4063708484012372	-0.03127581582911243	ridge_mdtb_wb_007_alpha_8	L2regression	glm7	sc1	sess	True	mdtb_wb_007	cerebellum_suit	True	4	crossed	False	8	Wed Nov 24 01:23:34 2021
343	s08	0.42153373392042826	0.21314365355833065	7	0.4416279914663471	0.10038576176391696	ridge_mdtb_wb_007_alpha_10	L2regression	glm7	sc1	sess	True	mdtb_wb_007	cerebellum_suit	True	4	crossed	False	10	Wed Nov 24 01:23:36 2021
344	s26	0.3563645279402897	0.2962803127119217	7	0.3814170168245552	0.17040390488803125	ridge_mdtb_wb_007_alpha_10	L2regression	glm7	sc1	sess	True	mdtb_wb_007	cerebellum_suit	True	4	crossed	False	10	Wed Nov 24 01:23:37 2021
345	s04	0.3346864236519829	0.2806641928509888	7	0.3724926453276571	0.15103520164824175	ridge_mdtb_wb_007_alpha_10	L2regression	glm7	sc1	sess	True	mdtb_wb_007	cerebellum_suit	True	4	crossed	False	10	Wed Nov 24 01:23:38 2021
346	s14	0.3504883203506681	0.32203868612333164	7	0.3745899659047876	0.251563829433063	ridge_mdtb_wb_007_alpha_10	L2regression	glm7	sc1	sess	True	mdtb_wb_007	cerebellum_suit	True	4	crossed	False	10	Wed Nov 24 01:23:39 2021
347	s06	0.32838024935259	0.5259593486903832	7	0.3666619757594917	0.361045996114672	ridge_mdtb_wb_007_alpha_10	L2regression	glm7	sc1	sess	True	mdtb_wb_007	cerebellum_suit	True	4	crossed	False	10	Wed Nov 24 01:23:41 2021
348	s22	0.400501875789688	0.5345903097478598	7	0.4665858173162362	0.4145680870713151	ridge_mdtb_wb_007_alpha_10	L2regression	glm7	sc1	sess	True	mdtb_wb_007	cerebellum_suit	True	4	crossed	False	10	Wed Nov 24 01:23:42 2021
349	s21	0.3808974545567245	0.2295305107848228	7	0.4061344260270764	-0.033580501488873704	ridge_mdtb_wb_007_alpha_10	L2regression	glm7	sc1	sess	True	mdtb_wb_007	cerebellum_suit	True	4	crossed	False	10	Wed Nov 24 01:23:43 2021
350	s08	0.02163148492440093	0.9988267424540936	200	0.6567967047941939	0.08177846078583585	ridge_shen_alpha_-2	L2regression	glm7	sc1	sess	True	shen	cerebellum_suit	True	4	crossed	False	-2	Wed Nov 24 01:21:28 2021
351	s26	0.016823451948577418	0.9990366430972784	200	0.5214724924432363	0.22820381570734305	ridge_shen_alpha_-2	L2regression	glm7	sc1	sess	True	shen	cerebellum_suit	True	4	crossed	False	-2	Wed Nov 24 01:21:29 2021
352	s04	0.011931060142721328	0.9994792543981552	200	0.5030345493305098	0.2046270617086288	ridge_shen_alpha_-2	L2regression	glm7	sc1	sess	True	shen	cerebellum_suit	True	4	crossed	False	-2	Wed Nov 24 01:21:31 2021
353	s14	0.02133268314780279	0.9983558955776366	200	0.5393088014890789	0.15472314702892406	ridge_shen_alpha_-2	L2regression	glm7	sc1	sess	True	shen	cerebellum_suit	True	4	crossed	False	-2	Wed Nov 24 01:21:32 2021
354	s06	0.013749599604608205	0.9992841100263096	200	0.4661111384156438	0.3261457798854558	ridge_shen_alpha_-2	L2regression	glm7	sc1	sess	True	shen	cerebellum_suit	True	4	crossed	False	-2	Wed Nov 24 01:21:33 2021
355	s22	0.012414430432522288	0.9996205685389932	200	0.5635389826026098	0.3700700326744481	ridge_shen_alpha_-2	L2regression	glm7	sc1	sess	True	shen	cerebellum_suit	True	4	crossed	False	-2	Wed Nov 24 01:21:34 2021
356	s21	0.012589405846212388	0.999524046869882	200	0.6096030852664284	0.03162472133803035	ridge_shen_alpha_-2	L2regression	glm7	sc1	sess	True	shen	cerebellum_suit	True	4	crossed	False	-2	Wed Nov 24 01:21:35 2021
357	s08	0.07441704947611945	0.986327589815774	200	0.6060681849968514	0.09422508072857967	ridge_shen_alpha_0	L2regression	glm7	sc1	sess	True	shen	cerebellum_suit	True	4	crossed	False	0	Wed Nov 24 01:21:36 2021
358	s26	0.06164302306896983	0.9870166785860536	200	0.4741783664920112	0.25044402874427785	ridge_shen_alpha_0	L2regression	glm7	sc1	sess	True	shen	cerebellum_suit	True	4	crossed	False	0	Wed Nov 24 01:21:38 2021
359	s04	0.04654928342490966	0.992017926963022	200	0.4656842306214424	0.2251371336473134	ridge_shen_alpha_0	L2regression	glm7	sc1	sess	True	shen	cerebellum_suit	True	4	crossed	False	0	Wed Nov 24 01:21:39 2021
360	s14	0.06855099298762247	0.9829540020434993	200	0.4852961073799647	0.18147186136859794	ridge_shen_alpha_0	L2regression	glm7	sc1	sess	True	shen	cerebellum_suit	True	4	crossed	False	0	Wed Nov 24 01:21:40 2021
361	s06	0.0495067922535112	0.9906956248789502	200	0.4319954560719877	0.3494636912124284	ridge_shen_alpha_0	L2regression	glm7	sc1	sess	True	shen	cerebellum_suit	True	4	crossed	False	0	Wed Nov 24 01:21:41 2021
362	s22	0.05153539498778656	0.9934920349078498	200	0.5248899994521491	0.397302497936014	ridge_shen_alpha_0	L2regression	glm7	sc1	sess	True	shen	cerebellum_suit	True	4	crossed	False	0	Wed Nov 24 01:21:42 2021
363	s21	0.051611548151719935	0.991971835353116	200	0.5706211074475083	0.03335836261785074	ridge_shen_alpha_0	L2regression	glm7	sc1	sess	True	shen	cerebellum_suit	True	4	crossed	False	0	Wed Nov 24 01:21:44 2021
364	s08	0.1572144908533861	0.9386077276604616	200	0.5421157875809972	0.1214724007188044	ridge_shen_alpha_2	L2regression	glm7	sc1	sess	True	shen	cerebellum_suit	True	4	crossed	False	2	Wed Nov 24 01:21:45 2021
365	s26	0.1316247219073171	0.939027479499106	200	0.4189214743800591	0.28642133490836424	ridge_shen_alpha_2	L2regression	glm7	sc1	sess	True	shen	cerebellum_suit	True	4	crossed	False	2	Wed Nov 24 01:21:46 2021
366	s04	0.10216078541102924	0.9615137129575128	200	0.41544665379619183	0.2589861646838827	ridge_shen_alpha_2	L2regression	glm7	sc1	sess	True	shen	cerebellum_suit	True	4	crossed	False	2	Wed Nov 24 01:21:47 2021
367	s14	0.13332757957900815	0.9353113203861712	200	0.4332858084886492	0.2121584801498147	ridge_shen_alpha_2	L2regression	glm7	sc1	sess	True	shen	cerebellum_suit	True	4	crossed	False	2	Wed Nov 24 01:21:49 2021
368	s06	0.1051752728894018	0.9572394937138374	200	0.3911033917797671	0.3800486359204969	ridge_shen_alpha_2	L2regression	glm7	sc1	sess	True	shen	cerebellum_suit	True	4	crossed	False	2	Wed Nov 24 01:21:50 2021
369	s22	0.11938073828870413	0.9645887533584028	200	0.4757803567161505	0.4358930864057573	ridge_shen_alpha_2	L2regression	glm7	sc1	sess	True	shen	cerebellum_suit	True	4	crossed	False	2	Wed Nov 24 01:21:51 2021
370	s21	0.11824424396443453	0.9584277819772395	200	0.5217754149331884	0.035181672555647435	ridge_shen_alpha_2	L2regression	glm7	sc1	sess	True	shen	cerebellum_suit	True	4	crossed	False	2	Wed Nov 24 01:21:52 2021
371	s08	0.2528640777732499	0.8352559703294301	200	0.4838655427972432	0.16640690486494375	ridge_shen_alpha_4	L2regression	glm7	sc1	sess	True	shen	cerebellum_suit	True	4	crossed	False	4	Wed Nov 24 01:21:53 2021
372	s26	0.2068959179748375	0.8399589684815953	200	0.3835073044911115	0.3061923592895391	ridge_shen_alpha_4	L2regression	glm7	sc1	sess	True	shen	cerebellum_suit	True	4	crossed	False	4	Wed Nov 24 01:21:55 2021
373	s04	0.1743064754270681	0.887872546713185	200	0.3806810895874783	0.2821298445999221	ridge_shen_alpha_4	L2regression	glm7	sc1	sess	True	shen	cerebellum_suit	True	4	crossed	False	4	Wed Nov 24 01:21:56 2021
374	s14	0.20792132062182173	0.8336475651470947	200	0.3935018499366119	0.2455929189137737	ridge_shen_alpha_4	L2regression	glm7	sc1	sess	True	shen	cerebellum_suit	True	4	crossed	False	4	Wed Nov 24 01:21:57 2021
375	s06	0.1713419382450728	0.8808826649629307	200	0.3581354932445635	0.4111111258383655	ridge_shen_alpha_4	L2regression	glm7	sc1	sess	True	shen	cerebellum_suit	True	4	crossed	False	4	Wed Nov 24 01:21:58 2021
376	s22	0.20048027003629126	0.8962270488021797	200	0.4416246621127314	0.4619081177316965	ridge_shen_alpha_4	L2regression	glm7	sc1	sess	True	shen	cerebellum_suit	True	4	crossed	False	4	Wed Nov 24 01:21:59 2021
377	s21	0.20536601163434168	0.8729472188589966	200	0.4725495346092421	0.04775512051177935	ridge_shen_alpha_4	L2regression	glm7	sc1	sess	True	shen	cerebellum_suit	True	4	crossed	False	4	Wed Nov 24 01:22:01 2021
378	s08	0.3381611034347274	0.6702796608278627	200	0.4460383499920382	0.19444676246257456	ridge_shen_alpha_6	L2regression	glm7	sc1	sess	True	shen	cerebellum_suit	True	4	crossed	False	6	Wed Nov 24 01:22:02 2021
379	s26	0.2728449603726872	0.7011254786923602	200	0.3649967343807933	0.30810441883559314	ridge_shen_alpha_6	L2regression	glm7	sc1	sess	True	shen	cerebellum_suit	True	4	crossed	False	6	Wed Nov 24 01:22:04 2021
380	s04	0.251872776871085	0.7371685972072892	200	0.3610124261371059	0.2825477277544375	ridge_shen_alpha_6	L2regression	glm7	sc1	sess	True	shen	cerebellum_suit	True	4	crossed	False	6	Wed Nov 24 01:22:05 2021
381	s14	0.27267380664173496	0.6800881263117515	200	0.3642613132253691	0.2854002438899376	ridge_shen_alpha_6	L2regression	glm7	sc1	sess	True	shen	cerebellum_suit	True	4	crossed	False	6	Wed Nov 24 01:22:06 2021
382	s06	0.2338562413648635	0.7616094190338214	200	0.3349675313010209	0.4319412812315033	ridge_shen_alpha_6	L2regression	glm7	sc1	sess	True	shen	cerebellum_suit	True	4	crossed	False	6	Wed Nov 24 01:22:08 2021
383	s22	0.2790911698896322	0.7887500108205858	200	0.41287670758530376	0.4877588020393617	ridge_shen_alpha_6	L2regression	glm7	sc1	sess	True	shen	cerebellum_suit	True	4	crossed	False	6	Wed Nov 24 01:22:09 2021
384	s21	0.29217582885414795	0.7250975748460481	200	0.4248229662411703	0.06144629140370205	ridge_shen_alpha_6	L2regression	glm7	sc1	sess	True	shen	cerebellum_suit	True	4	crossed	False	6	Wed Nov 24 01:22:11 2021
385	s08	0.3921623675018327	0.5009822516614215	200	0.4394081080700479	0.16907554180340945	ridge_shen_alpha_8	L2regression	glm7	sc1	sess	True	shen	cerebellum_suit	True	4	crossed	False	8	Wed Nov 24 01:22:12 2021
386	s26	0.3226487383908872	0.5662839473585398	200	0.3682763965302077	0.2801388960321997	ridge_shen_alpha_8	L2regression	glm7	sc1	sess	True	shen	cerebellum_suit	True	4	crossed	False	8	Wed Nov 24 01:22:13 2021
387	s04	0.3035804731527003	0.5534362053610673	200	0.3616561963978386	0.24849412045230546	ridge_shen_alpha_8	L2regression	glm7	sc1	sess	True	shen	cerebellum_suit	True	4	crossed	False	8	Wed Nov 24 01:22:15 2021
388	s14	0.31583942740889154	0.5250827496575613	200	0.3596498742740561	0.2916332187673897	ridge_shen_alpha_8	L2regression	glm7	sc1	sess	True	shen	cerebellum_suit	True	4	crossed	False	8	Wed Nov 24 01:22:16 2021
389	s06	0.2839321777673506	0.6597800246665665	200	0.3394751164665215	0.4211965969502175	ridge_shen_alpha_8	L2regression	glm7	sc1	sess	True	shen	cerebellum_suit	True	4	crossed	False	8	Wed Nov 24 01:22:18 2021
390	s22	0.34521058823175743	0.6943214022413724	200	0.4258263064901404	0.4793152054795837	ridge_shen_alpha_8	L2regression	glm7	sc1	sess	True	shen	cerebellum_suit	True	4	crossed	False	8	Wed Nov 24 01:22:19 2021
391	s21	0.3515449400288244	0.5539873654501686	200	0.4085287639622375	0.03467494649502082	ridge_shen_alpha_8	L2regression	glm7	sc1	sess	True	shen	cerebellum_suit	True	4	crossed	False	8	Wed Nov 24 01:22:20 2021
392	s08	0.4149100661825527	0.3523462379070361	200	0.4407587053042053	0.12302692277229688	ridge_shen_alpha_10	L2regression	glm7	sc1	sess	True	shen	cerebellum_suit	True	4	crossed	False	10	Wed Nov 24 01:22:22 2021
393	s26	0.34859642921753625	0.4550425177749271	200	0.3777785809104144	0.2410542362080552	ridge_shen_alpha_10	L2regression	glm7	sc1	sess	True	shen	cerebellum_suit	True	4	crossed	False	10	Wed Nov 24 01:22:23 2021
394	s04	0.3268549997425022	0.4183014429419573	200	0.3689389275607585	0.20796942661574536	ridge_shen_alpha_10	L2regression	glm7	sc1	sess	True	shen	cerebellum_suit	True	4	crossed	False	10	Wed Nov 24 01:22:24 2021
395	s14	0.34023011043523155	0.4163682429405184	200	0.3688334325838957	0.2691322015241203	ridge_shen_alpha_10	L2regression	glm7	sc1	sess	True	shen	cerebellum_suit	True	4	crossed	False	10	Wed Nov 24 01:22:25 2021
396	s06	0.3176875073004553	0.6035042458380052	200	0.3595952181141777	0.3984047455734875	ridge_shen_alpha_10	L2regression	glm7	sc1	sess	True	shen	cerebellum_suit	True	4	crossed	False	10	Wed Nov 24 01:22:27 2021
397	s22	0.3876767660154571	0.639435700875821	200	0.4567658499115476	0.4502147053084599	ridge_shen_alpha_10	L2regression	glm7	sc1	sess	True	shen	cerebellum_suit	True	4	crossed	False	10	Wed Nov 24 01:22:28 2021
398	s21	0.37488993208997534	0.4110101723360281	200	0.4063455420676644	0.005151477839446406	ridge_shen_alpha_10	L2regression	glm7	sc1	sess	True	shen	cerebellum_suit	True	4	crossed	False	10	Wed Nov 24 01:22:29 2021
399	s08	0.006741268798767986	0.9998948199849882	333	0.6076753706137337	0.14085834365777855	ridge_gordon_alpha_-2	L2regression	glm7	sc1	sess	True	gordon	cerebellum_suit	True	4	crossed	False	-2	Wed Nov 24 01:20:06 2021
400	s26	0.005502888718686857	0.9999038597979484	333	0.4884652782524564	0.2601451355585678	ridge_gordon_alpha_-2	L2regression	glm7	sc1	sess	True	gordon	cerebellum_suit	True	4	crossed	False	-2	Wed Nov 24 01:20:08 2021
401	s04	0.004334188174209292	0.9999336147249472	333	0.4769879811360197	0.200203899491062	ridge_gordon_alpha_-2	L2regression	glm7	sc1	sess	True	gordon	cerebellum_suit	True	4	crossed	False	-2	Wed Nov 24 01:20:10 2021
402	s14	0.006783399950841416	0.9998448024302974	333	0.4929123333693406	0.18759153355460376	ridge_gordon_alpha_-2	L2regression	glm7	sc1	sess	True	gordon	cerebellum_suit	True	4	crossed	False	-2	Wed Nov 24 01:20:11 2021
403	s06	0.004119605424563621	0.9999391765977099	333	0.4231093863064298	0.3721480371754823	ridge_gordon_alpha_-2	L2regression	glm7	sc1	sess	True	gordon	cerebellum_suit	True	4	crossed	False	-2	Wed Nov 24 01:20:13 2021
404	s22	0.00385546539481909	0.9999658857560428	333	0.5291726926611526	0.3851743115203794	ridge_gordon_alpha_-2	L2regression	glm7	sc1	sess	True	gordon	cerebellum_suit	True	4	crossed	False	-2	Wed Nov 24 01:20:14 2021
405	s21	0.004110331297874325	0.9999511372595128	333	0.5643569663359561	0.03547871675289678	ridge_gordon_alpha_-2	L2regression	glm7	sc1	sess	True	gordon	cerebellum_suit	True	4	crossed	False	-2	Wed Nov 24 01:20:16 2021
406	s08	0.03666957527570516	0.9968569452242696	333	0.5892828877813945	0.14376960632148786	ridge_gordon_alpha_0	L2regression	glm7	sc1	sess	True	gordon	cerebellum_suit	True	4	crossed	False	0	Wed Nov 24 01:20:17 2021
407	s26	0.03068526620300285	0.9969564246507888	333	0.47155796802664296	0.26555436848735736	ridge_gordon_alpha_0	L2regression	glm7	sc1	sess	True	gordon	cerebellum_suit	True	4	crossed	False	0	Wed Nov 24 01:20:19 2021
408	s04	0.02394873969401166	0.9979647345450054	333	0.4619526935388627	0.2091526189125602	ridge_gordon_alpha_0	L2regression	glm7	sc1	sess	True	gordon	cerebellum_suit	True	4	crossed	False	0	Wed Nov 24 01:20:20 2021
409	s14	0.03497585108133839	0.9958128733274356	333	0.4731988740837332	0.1994684073637817	ridge_gordon_alpha_0	L2regression	glm7	sc1	sess	True	gordon	cerebellum_suit	True	4	crossed	False	0	Wed Nov 24 01:20:22 2021
410	s06	0.023368731005117386	0.9980188760909772	333	0.4117539344204172	0.383807891815568	ridge_gordon_alpha_0	L2regression	glm7	sc1	sess	True	gordon	cerebellum_suit	True	4	crossed	False	0	Wed Nov 24 01:20:23 2021
411	s22	0.02297920316148688	0.9987797259342592	333	0.5166252509455066	0.3962463924817929	ridge_gordon_alpha_0	L2regression	glm7	sc1	sess	True	gordon	cerebellum_suit	True	4	crossed	False	0	Wed Nov 24 01:20:24 2021
412	s21	0.023778746952853463	0.9983661905552966	333	0.5502706198221599	0.0381515530619452	ridge_gordon_alpha_0	L2regression	glm7	sc1	sess	True	gordon	cerebellum_suit	True	4	crossed	False	0	Wed Nov 24 01:20:26 2021
413	s08	0.11131622188432624	0.9706413318685388	333	0.5438143392166079	0.15664734464402089	ridge_gordon_alpha_2	L2regression	glm7	sc1	sess	True	gordon	cerebellum_suit	True	4	crossed	False	2	Wed Nov 24 01:20:28 2021
414	s26	0.0947158594599218	0.9697861981272388	333	0.4299697877347074	0.2823492794899656	ridge_gordon_alpha_2	L2regression	glm7	sc1	sess	True	gordon	cerebellum_suit	True	4	crossed	False	2	Wed Nov 24 01:20:29 2021
415	s04	0.07426959528582625	0.9802833268108556	333	0.4262425802312329	0.2355963909201806	ridge_gordon_alpha_2	L2regression	glm7	sc1	sess	True	gordon	cerebellum_suit	True	4	crossed	False	2	Wed Nov 24 01:20:30 2021
416	s14	0.09763210573637318	0.9665481531784812	333	0.4346268026667954	0.22431385521117286	ridge_gordon_alpha_2	L2regression	glm7	sc1	sess	True	gordon	cerebellum_suit	True	4	crossed	False	2	Wed Nov 24 01:20:32 2021
417	s06	0.07433598944694406	0.9793204553138916	333	0.3836644060766797	0.4121275322262751	ridge_gordon_alpha_2	L2regression	glm7	sc1	sess	True	gordon	cerebellum_suit	True	4	crossed	False	2	Wed Nov 24 01:20:33 2021
418	s22	0.08049655247214497	0.984739599721331	333	0.481310979721509	0.4301496899694897	ridge_gordon_alpha_2	L2regression	glm7	sc1	sess	True	gordon	cerebellum_suit	True	4	crossed	False	2	Wed Nov 24 01:20:35 2021
419	s21	0.07950374068635742	0.9818932784108624	333	0.5137200275378724	0.045214102615445416	ridge_gordon_alpha_2	L2regression	glm7	sc1	sess	True	gordon	cerebellum_suit	True	4	crossed	False	2	Wed Nov 24 01:20:36 2021
420	s08	0.2123295253011261	0.8909819776682758	333	0.4895072822119376	0.17732088241564795	ridge_gordon_alpha_4	L2regression	glm7	sc1	sess	True	gordon	cerebellum_suit	True	4	crossed	False	4	Wed Nov 24 01:20:38 2021
421	s26	0.1748488475399539	0.8918745770185414	333	0.3926107266889638	0.29820151863192235	ridge_gordon_alpha_4	L2regression	glm7	sc1	sess	True	gordon	cerebellum_suit	True	4	crossed	False	4	Wed Nov 24 01:20:39 2021
422	s04	0.14559804101202034	0.9247240782985288	333	0.3892542486483772	0.26897802932006065	ridge_gordon_alpha_4	L2regression	glm7	sc1	sess	True	gordon	cerebellum_suit	True	4	crossed	False	4	Wed Nov 24 01:20:40 2021
423	s14	0.17526245594029718	0.8883244909874547	333	0.3978150471753514	0.252889587652253	ridge_gordon_alpha_4	L2regression	glm7	sc1	sess	True	gordon	cerebellum_suit	True	4	crossed	False	4	Wed Nov 24 01:20:42 2021
424	s06	0.14066066998139945	0.923484587555734	333	0.3559411174169215	0.4333130266742287	ridge_gordon_alpha_4	L2regression	glm7	sc1	sess	True	gordon	cerebellum_suit	True	4	crossed	False	4	Wed Nov 24 01:20:43 2021
425	s22	0.1657290353375571	0.9326503705202251	333	0.4462268809506347	0.4623885411843342	ridge_gordon_alpha_4	L2regression	glm7	sc1	sess	True	gordon	cerebellum_suit	True	4	crossed	False	4	Wed Nov 24 01:20:45 2021
426	s21	0.16438495256549449	0.9242158993030776	333	0.4741505680602539	0.052078938603769866	ridge_gordon_alpha_4	L2regression	glm7	sc1	sess	True	gordon	cerebellum_suit	True	4	crossed	False	4	Wed Nov 24 01:20:46 2021
427	s08	0.3127385358732811	0.7383866168176363	333	0.4493029518295789	0.1923767007065673	ridge_gordon_alpha_6	L2regression	glm7	sc1	sess	True	gordon	cerebellum_suit	True	4	crossed	False	6	Wed Nov 24 01:20:47 2021
428	s26	0.2512943285151697	0.7590248228084008	333	0.3702934420945711	0.2976121241520312	ridge_gordon_alpha_6	L2regression	glm7	sc1	sess	True	gordon	cerebellum_suit	True	4	crossed	False	6	Wed Nov 24 01:20:49 2021
429	s04	0.2300880835868035	0.7946448272560963	333	0.3643160132461217	0.27987909014260537	ridge_gordon_alpha_6	L2regression	glm7	sc1	sess	True	gordon	cerebellum_suit	True	4	crossed	False	6	Wed Nov 24 01:20:50 2021
430	s14	0.25112784179896563	0.7462072035043296	333	0.3672175982857612	0.28704285828349185	ridge_gordon_alpha_6	L2regression	glm7	sc1	sess	True	gordon	cerebellum_suit	True	4	crossed	False	6	Wed Nov 24 01:20:52 2021
431	s06	0.2109672115952504	0.8160435299217591	333	0.3365286004201015	0.4375753023066051	ridge_gordon_alpha_6	L2regression	glm7	sc1	sess	True	gordon	cerebellum_suit	True	4	crossed	False	6	Wed Nov 24 01:20:53 2021
432	s22	0.2545768738364383	0.8298028386654986	333	0.41557380160847024	0.4877995764571024	ridge_gordon_alpha_6	L2regression	glm7	sc1	sess	True	gordon	cerebellum_suit	True	4	crossed	False	6	Wed Nov 24 01:20:55 2021
433	s21	0.26333197873540465	0.7948428636114412	333	0.4313764783771101	0.061436068978357926	ridge_gordon_alpha_6	L2regression	glm7	sc1	sess	True	gordon	cerebellum_suit	True	4	crossed	False	6	Wed Nov 24 01:20:56 2021
434	s08	0.3806458508240686	0.5576266542538937	333	0.43864799041565655	0.1765574824701781	ridge_gordon_alpha_8	L2regression	glm7	sc1	sess	True	gordon	cerebellum_suit	True	4	crossed	False	8	Wed Nov 24 01:20:58 2021
435	s26	0.3104785486528774	0.6155885739756888	333	0.3674619345624705	0.2737062067347834	ridge_gordon_alpha_8	L2regression	glm7	sc1	sess	True	gordon	cerebellum_suit	True	4	crossed	False	8	Wed Nov 24 01:20:59 2021
436	s04	0.2928172320622079	0.61172780081563	333	0.3605543769057378	0.2540997343651965	ridge_gordon_alpha_8	L2regression	glm7	sc1	sess	True	gordon	cerebellum_suit	True	4	crossed	False	8	Wed Nov 24 01:21:01 2021
437	s14	0.30520558218897337	0.5781369511121107	333	0.3582637412610345	0.29916412617299115	ridge_gordon_alpha_8	L2regression	glm7	sc1	sess	True	gordon	cerebellum_suit	True	4	crossed	False	8	Wed Nov 24 01:21:02 2021
438	s06	0.26984715255547176	0.7016732233300707	333	0.33550010436112	0.4287061582711461	ridge_gordon_alpha_8	L2regression	glm7	sc1	sess	True	gordon	cerebellum_suit	True	4	crossed	False	8	Wed Nov 24 01:21:04 2021
439	s22	0.32826114315725485	0.7275420882566703	333	0.4193522932934607	0.4844058004580754	ridge_gordon_alpha_8	L2regression	glm7	sc1	sess	True	gordon	cerebellum_suit	True	4	crossed	False	8	Wed Nov 24 01:21:05 2021
440	s21	0.338420482617611	0.6219344706321157	333	0.4095562868789985	0.04713762780612692	ridge_gordon_alpha_8	L2regression	glm7	sc1	sess	True	gordon	cerebellum_suit	True	4	crossed	False	8	Wed Nov 24 01:21:06 2021
441	s08	0.4114175316614576	0.3792710141513614	333	0.4403419403654874	0.13157153732906185	ridge_gordon_alpha_10	L2regression	glm7	sc1	sess	True	gordon	cerebellum_suit	True	4	crossed	False	10	Wed Nov 24 01:21:08 2021
442	s26	0.3444897179338139	0.4843215570433268	333	0.37653359205982734	0.2342600450676401	ridge_gordon_alpha_10	L2regression	glm7	sc1	sess	True	gordon	cerebellum_suit	True	4	crossed	False	10	Wed Nov 24 01:21:09 2021
443	s04	0.32327884500505416	0.4384258318492367	333	0.3678332329162175	0.20374218720373727	ridge_gordon_alpha_10	L2regression	glm7	sc1	sess	True	gordon	cerebellum_suit	True	4	crossed	False	10	Wed Nov 24 01:21:11 2021
444	s14	0.3357029104521619	0.4354509786036565	333	0.3667347063070848	0.2713405623892966	ridge_gordon_alpha_10	L2regression	glm7	sc1	sess	True	gordon	cerebellum_suit	True	4	crossed	False	10	Wed Nov 24 01:21:12 2021
445	s06	0.3124112682633738	0.6337170107625074	333	0.3569938377703793	0.4036138850692557	ridge_gordon_alpha_10	L2regression	glm7	sc1	sess	True	gordon	cerebellum_suit	True	4	crossed	False	10	Wed Nov 24 01:21:14 2021
446	s22	0.38113998021728	0.660493158713167	333	0.453128104580865	0.4506731780428805	ridge_gordon_alpha_10	L2regression	glm7	sc1	sess	True	gordon	cerebellum_suit	True	4	crossed	False	10	Wed Nov 24 01:21:15 2021
447	s21	0.3714591452304741	0.4534417619560352	333	0.4063893618885808	0.016872489527491645	ridge_gordon_alpha_10	L2regression	glm7	sc1	sess	True	gordon	cerebellum_suit	True	4	crossed	False	10	Wed Nov 24 01:21:17 2021
448	s08	0.02152277080925708	0.9988659962150715	210	0.6609900823844589	0.12792738493716205	ridge_fan_alpha_-2	L2regression	glm7	sc1	sess	True	fan	cerebellum_suit	True	4	crossed	False	-2	Wed Nov 24 01:18:49 2021
449	s26	0.01672996089160779	0.9990617003806986	210	0.5080488827318723	0.22856254640015944	ridge_fan_alpha_-2	L2regression	glm7	sc1	sess	True	fan	cerebellum_suit	True	4	crossed	False	-2	Wed Nov 24 01:18:50 2021
450	s04	0.013703765737867322	0.9993015798827084	210	0.4983358484294058	0.1931227576056026	ridge_fan_alpha_-2	L2regression	glm7	sc1	sess	True	fan	cerebellum_suit	True	4	crossed	False	-2	Wed Nov 24 01:18:52 2021
451	s14	0.020494371962626524	0.9985106110673388	210	0.5208020478240117	0.1793127274557077	ridge_fan_alpha_-2	L2regression	glm7	sc1	sess	True	fan	cerebellum_suit	True	4	crossed	False	-2	Wed Nov 24 01:18:53 2021
452	s06	0.013430339566348568	0.9993248995255986	210	0.4544905109131713	0.3326220806153665	ridge_fan_alpha_-2	L2regression	glm7	sc1	sess	True	fan	cerebellum_suit	True	4	crossed	False	-2	Wed Nov 24 01:18:55 2021
453	s22	0.012878152659148422	0.9996050246500028	210	0.5460171908580871	0.37856980721636624	ridge_fan_alpha_-2	L2regression	glm7	sc1	sess	True	fan	cerebellum_suit	True	4	crossed	False	-2	Wed Nov 24 01:18:56 2021
454	s21	0.01268872805826534	0.9995156338255804	210	0.5989342556513713	0.02422596394260161	ridge_fan_alpha_-2	L2regression	glm7	sc1	sess	True	fan	cerebellum_suit	True	4	crossed	False	-2	Wed Nov 24 01:18:57 2021
455	s08	0.07739656271685441	0.9851707757179096	210	0.6071655737335249	0.14363573416752354	ridge_fan_alpha_0	L2regression	glm7	sc1	sess	True	fan	cerebellum_suit	True	4	crossed	False	0	Wed Nov 24 01:18:59 2021
456	s26	0.06222658000633489	0.986934381384756	210	0.4695214649459162	0.2464083183710941	ridge_fan_alpha_0	L2regression	glm7	sc1	sess	True	fan	cerebellum_suit	True	4	crossed	False	0	Wed Nov 24 01:19:00 2021
457	s04	0.04959883656648526	0.9908790622719316	210	0.456738529966009	0.22343301735357407	ridge_fan_alpha_0	L2regression	glm7	sc1	sess	True	fan	cerebellum_suit	True	4	crossed	False	0	Wed Nov 24 01:19:01 2021
458	s14	0.0692197338651671	0.9827073497939548	210	0.4747960002204187	0.2026396205803032	ridge_fan_alpha_0	L2regression	glm7	sc1	sess	True	fan	cerebellum_suit	True	4	crossed	False	0	Wed Nov 24 01:19:02 2021
459	s06	0.05079876713038582	0.9902175862028773	210	0.42014474185240014	0.36344217483180574	ridge_fan_alpha_0	L2regression	glm7	sc1	sess	True	fan	cerebellum_suit	True	4	crossed	False	0	Wed Nov 24 01:19:03 2021
460	s22	0.053232673698566525	0.9931082594346576	210	0.5121372306766911	0.4067732754368403	ridge_fan_alpha_0	L2regression	glm7	sc1	sess	True	fan	cerebellum_suit	True	4	crossed	False	0	Wed Nov 24 01:19:05 2021
461	s21	0.05147279938380162	0.9920890873048108	210	0.5678424385350267	0.024922569280521792	ridge_fan_alpha_0	L2regression	glm7	sc1	sess	True	fan	cerebellum_suit	True	4	crossed	False	0	Wed Nov 24 01:19:06 2021
462	s08	0.16114137627311234	0.9353278504223806	210	0.5369393571898045	0.16563986936371378	ridge_fan_alpha_2	L2regression	glm7	sc1	sess	True	fan	cerebellum_suit	True	4	crossed	False	2	Wed Nov 24 01:19:07 2021
463	s26	0.13434858449666548	0.9369566618422386	210	0.4232104510863288	0.2694022374546877	ridge_fan_alpha_2	L2regression	glm7	sc1	sess	True	fan	cerebellum_suit	True	4	crossed	False	2	Wed Nov 24 01:19:08 2021
464	s04	0.10505300736394443	0.9593963387531113	210	0.4124385343874689	0.2609421731449758	ridge_fan_alpha_2	L2regression	glm7	sc1	sess	True	fan	cerebellum_suit	True	4	crossed	False	2	Wed Nov 24 01:19:09 2021
465	s14	0.13586611871070606	0.932234976618508	210	0.4295139208766983	0.2305874058427016	ridge_fan_alpha_2	L2regression	glm7	sc1	sess	True	fan	cerebellum_suit	True	4	crossed	False	2	Wed Nov 24 01:19:11 2021
466	s06	0.10721230309997544	0.9554146654140842	210	0.3798466065944647	0.4033561050299915	ridge_fan_alpha_2	L2regression	glm7	sc1	sess	True	fan	cerebellum_suit	True	4	crossed	False	2	Wed Nov 24 01:19:12 2021
467	s22	0.1207157015153691	0.9637981834523992	210	0.4692720846797791	0.4454675801354303	ridge_fan_alpha_2	L2regression	glm7	sc1	sess	True	fan	cerebellum_suit	True	4	crossed	False	2	Wed Nov 24 01:19:14 2021
468	s21	0.11940791958536348	0.958009682253975	210	0.5208333284202252	0.0267598595950326	ridge_fan_alpha_2	L2regression	glm7	sc1	sess	True	fan	cerebellum_suit	True	4	crossed	False	2	Wed Nov 24 01:19:15 2021
469	s08	0.2577756185380411	0.8258502174034211	210	0.4769297000663163	0.1916772330159759	ridge_fan_alpha_4	L2regression	glm7	sc1	sess	True	fan	cerebellum_suit	True	4	crossed	False	4	Wed Nov 24 01:19:17 2021
470	s26	0.2118835276324896	0.8305928645306738	210	0.3901116844140689	0.2833493809504789	ridge_fan_alpha_4	L2regression	glm7	sc1	sess	True	fan	cerebellum_suit	True	4	crossed	False	4	Wed Nov 24 01:19:18 2021
471	s04	0.1777820830994324	0.8821009885447851	210	0.3815436032314897	0.2796018414441373	ridge_fan_alpha_4	L2regression	glm7	sc1	sess	True	fan	cerebellum_suit	True	4	crossed	False	4	Wed Nov 24 01:19:19 2021
472	s14	0.20826233926315896	0.8322937876879098	210	0.3917113607543372	0.25522158275895795	ridge_fan_alpha_4	L2regression	glm7	sc1	sess	True	fan	cerebellum_suit	True	4	crossed	False	4	Wed Nov 24 01:19:21 2021
473	s06	0.17125333366601322	0.8810353783556261	210	0.35261741471493296	0.42741802978357535	ridge_fan_alpha_4	L2regression	glm7	sc1	sess	True	fan	cerebellum_suit	True	4	crossed	False	4	Wed Nov 24 01:19:22 2021
474	s22	0.20154814626018885	0.8952396532496272	210	0.4381539456227125	0.469584715213845	ridge_fan_alpha_4	L2regression	glm7	sc1	sess	True	fan	cerebellum_suit	True	4	crossed	False	4	Wed Nov 24 01:19:23 2021
475	s21	0.2075401850426037	0.8717828279015165	210	0.4736591903474639	0.030440872689140037	ridge_fan_alpha_4	L2regression	glm7	sc1	sess	True	fan	cerebellum_suit	True	4	crossed	False	4	Wed Nov 24 01:19:25 2021
476	s08	0.3401469897024061	0.6604870093612923	210	0.4434657870044887	0.20583771355197847	ridge_fan_alpha_6	L2regression	glm7	sc1	sess	True	fan	cerebellum_suit	True	4	crossed	False	6	Wed Nov 24 01:19:26 2021
477	s26	0.2754284439138517	0.6895968609542146	210	0.3689051774851437	0.2874336271948469	ridge_fan_alpha_6	L2regression	glm7	sc1	sess	True	fan	cerebellum_suit	True	4	crossed	False	6	Wed Nov 24 01:19:28 2021
478	s04	0.25315276940082937	0.7312859265155245	210	0.36110769247010777	0.2803215512631368	ridge_fan_alpha_6	L2regression	glm7	sc1	sess	True	fan	cerebellum_suit	True	4	crossed	False	6	Wed Nov 24 01:19:29 2021
479	s14	0.2719481752956591	0.6822227240685725	210	0.363520119255452	0.2890329012444137	ridge_fan_alpha_6	L2regression	glm7	sc1	sess	True	fan	cerebellum_suit	True	4	crossed	False	6	Wed Nov 24 01:19:30 2021
480	s06	0.2330758812676529	0.7641809471753557	210	0.33449512518062946	0.4334332796525989	ridge_fan_alpha_6	L2regression	glm7	sc1	sess	True	fan	cerebellum_suit	True	4	crossed	False	6	Wed Nov 24 01:19:32 2021
481	s22	0.2795230579794855	0.7871615657955665	210	0.4124729497089745	0.4891184597054667	ridge_fan_alpha_6	L2regression	glm7	sc1	sess	True	fan	cerebellum_suit	True	4	crossed	False	6	Wed Nov 24 01:19:33 2021
482	s21	0.2949336662194033	0.7166234972259429	210	0.4274720608155237	0.03955412290561772	ridge_fan_alpha_6	L2regression	glm7	sc1	sess	True	fan	cerebellum_suit	True	4	crossed	False	6	Wed Nov 24 01:19:35 2021
483	s08	0.3921590515197131	0.4908919172298724	210	0.4387024221900737	0.1770866080083741	ridge_fan_alpha_8	L2regression	glm7	sc1	sess	True	fan	cerebellum_suit	True	4	crossed	False	8	Wed Nov 24 01:19:36 2021
484	s26	0.3229061220330053	0.5600495892055816	210	0.3693442325804216	0.2635868949126802	ridge_fan_alpha_8	L2regression	glm7	sc1	sess	True	fan	cerebellum_suit	True	4	crossed	False	8	Wed Nov 24 01:19:37 2021
485	s04	0.3038352510910849	0.5470688202382962	210	0.3618962075343098	0.2450263459846537	ridge_fan_alpha_8	L2regression	glm7	sc1	sess	True	fan	cerebellum_suit	True	4	crossed	False	8	Wed Nov 24 01:19:39 2021
486	s14	0.3156084487071187	0.52530534271588	210	0.35967715123223576	0.2911611492651892	ridge_fan_alpha_8	L2regression	glm7	sc1	sess	True	fan	cerebellum_suit	True	4	crossed	False	8	Wed Nov 24 01:19:40 2021
487	s06	0.283559759771476	0.6597690903972856	210	0.339958073219216	0.41503188209829744	ridge_fan_alpha_8	L2regression	glm7	sc1	sess	True	fan	cerebellum_suit	True	4	crossed	False	8	Wed Nov 24 01:19:42 2021
488	s22	0.3444544534612208	0.6946124545552403	210	0.4254927870956012	0.4777332124124149	ridge_fan_alpha_8	L2regression	glm7	sc1	sess	True	fan	cerebellum_suit	True	4	crossed	False	8	Wed Nov 24 01:19:43 2021
489	s21	0.35233618599099953	0.5392578742028201	210	0.40967605748901625	0.018427866701435088	ridge_fan_alpha_8	L2regression	glm7	sc1	sess	True	fan	cerebellum_suit	True	4	crossed	False	8	Wed Nov 24 01:19:44 2021
490	s08	0.4146528176087867	0.34481384428198714	210	0.4405154908258782	0.13135034554056774	ridge_fan_alpha_10	L2regression	glm7	sc1	sess	True	fan	cerebellum_suit	True	4	crossed	False	10	Wed Nov 24 01:19:46 2021
491	s26	0.34849829179171465	0.4446485509979167	210	0.3778974032915095	0.2265296750730699	ridge_fan_alpha_10	L2regression	glm7	sc1	sess	True	fan	cerebellum_suit	True	4	crossed	False	10	Wed Nov 24 01:19:47 2021
492	s04	0.3267542860367725	0.4022766239967739	210	0.3689461646306028	0.19956959305627128	ridge_fan_alpha_10	L2regression	glm7	sc1	sess	True	fan	cerebellum_suit	True	4	crossed	False	10	Wed Nov 24 01:19:49 2021
493	s14	0.339967601149777	0.40909379474826096	210	0.3686840665685952	0.2650251093129002	ridge_fan_alpha_10	L2regression	glm7	sc1	sess	True	fan	cerebellum_suit	True	4	crossed	False	10	Wed Nov 24 01:19:50 2021
494	s06	0.3174909587899524	0.5996352788318965	210	0.35968691886391546	0.3882945614481379	ridge_fan_alpha_10	L2regression	glm7	sc1	sess	True	fan	cerebellum_suit	True	4	crossed	False	10	Wed Nov 24 01:19:52 2021
495	s22	0.3873241299435545	0.6407565501375194	210	0.4566096644085332	0.4486681314841744	ridge_fan_alpha_10	L2regression	glm7	sc1	sess	True	fan	cerebellum_suit	True	4	crossed	False	10	Wed Nov 24 01:19:53 2021
496	s21	0.3749124633225216	0.3933920905355215	210	0.4065579756866522	-0.0056851708264349	ridge_fan_alpha_10	L2regression	glm7	sc1	sess	True	fan	cerebellum_suit	True	4	crossed	False	10	Wed Nov 24 01:19:54 2021
497	s08	0.2121317294762708	0.8669623569861865	50	0.6284444507494891	0.16838854382537768	ridge_arslan_50_alpha_-2	L2regression	glm7	sc1	sess	True	arslan_50	cerebellum_suit	True	4	crossed	False	-2	Wed Nov 24 01:17:30 2021
498	s26	0.17123336513806606	0.8821799913932064	50	0.5104092967473424	0.2105322599415992	ridge_arslan_50_alpha_-2	L2regression	glm7	sc1	sess	True	arslan_50	cerebellum_suit	True	4	crossed	False	-2	Wed Nov 24 01:17:32 2021
499	s04	0.14915732704791532	0.9029086584761344	50	0.5124375859018151	0.15322439652321204	ridge_arslan_50_alpha_-2	L2regression	glm7	sc1	sess	True	arslan_50	cerebellum_suit	True	4	crossed	False	-2	Wed Nov 24 01:17:33 2021
500	s14	0.16293021189867524	0.8902047587061392	50	0.4842205325134692	0.2162756405968552	ridge_arslan_50_alpha_-2	L2regression	glm7	sc1	sess	True	arslan_50	cerebellum_suit	True	4	crossed	False	-2	Wed Nov 24 01:17:35 2021
501	s06	0.1366526054913897	0.9203032164889364	50	0.4338637088326249	0.34873623352671324	ridge_arslan_50_alpha_-2	L2regression	glm7	sc1	sess	True	arslan_50	cerebellum_suit	True	4	crossed	False	-2	Wed Nov 24 01:17:36 2021
502	s22	0.16472056959087053	0.9259262713934544	50	0.5354485820165762	0.4152549675380101	ridge_arslan_50_alpha_-2	L2regression	glm7	sc1	sess	True	arslan_50	cerebellum_suit	True	4	crossed	False	-2	Wed Nov 24 01:17:38 2021
503	s21	0.17257369128652164	0.8954912735796384	50	0.623796853854054	0.030969068784735307	ridge_arslan_50_alpha_-2	L2regression	glm7	sc1	sess	True	arslan_50	cerebellum_suit	True	4	crossed	False	-2	Wed Nov 24 01:17:39 2021
504	s08	0.2510454921387385	0.8124358906950935	50	0.5360344294540833	0.20023353378249306	ridge_arslan_50_alpha_0	L2regression	glm7	sc1	sess	True	arslan_50	cerebellum_suit	True	4	crossed	False	0	Wed Nov 24 01:17:41 2021
505	s26	0.2004021810891527	0.8371303807449486	50	0.4422734467526029	0.2373463690605311	ridge_arslan_50_alpha_0	L2regression	glm7	sc1	sess	True	arslan_50	cerebellum_suit	True	4	crossed	False	0	Wed Nov 24 01:17:42 2021
506	s04	0.17407086817174755	0.8684614780944051	50	0.4472343029806952	0.17335908628805655	ridge_arslan_50_alpha_0	L2regression	glm7	sc1	sess	True	arslan_50	cerebellum_suit	True	4	crossed	False	0	Wed Nov 24 01:17:44 2021
507	s14	0.1903560356931071	0.8502215909278786	50	0.42741071493303895	0.2442262881022987	ridge_arslan_50_alpha_0	L2regression	glm7	sc1	sess	True	arslan_50	cerebellum_suit	True	4	crossed	False	0	Wed Nov 24 01:17:45 2021
508	s06	0.1616058305702982	0.8876114011251705	50	0.39217857058207306	0.3798927009812499	ridge_arslan_50_alpha_0	L2regression	glm7	sc1	sess	True	arslan_50	cerebellum_suit	True	4	crossed	False	0	Wed Nov 24 01:17:47 2021
509	s22	0.1894751522367948	0.902133501310436	50	0.4702450792532759	0.456036279492075	ridge_arslan_50_alpha_0	L2regression	glm7	sc1	sess	True	arslan_50	cerebellum_suit	True	4	crossed	False	0	Wed Nov 24 01:17:48 2021
510	s21	0.2021050633551364	0.8578045339974228	50	0.5483996498929937	0.007795833203556705	ridge_arslan_50_alpha_0	L2regression	glm7	sc1	sess	True	arslan_50	cerebellum_suit	True	4	crossed	False	0	Wed Nov 24 01:17:49 2021
511	s08	0.302137500568064	0.7170951204509922	50	0.4808503107567863	0.2099682604822619	ridge_arslan_50_alpha_2	L2regression	glm7	sc1	sess	True	arslan_50	cerebellum_suit	True	4	crossed	False	2	Wed Nov 24 01:17:51 2021
512	s26	0.2410596703148164	0.7544190047236802	50	0.40296810753203416	0.25653172877873964	ridge_arslan_50_alpha_2	L2regression	glm7	sc1	sess	True	arslan_50	cerebellum_suit	True	4	crossed	False	2	Wed Nov 24 01:17:52 2021
513	s04	0.22061590334272208	0.7815264137357171	50	0.4065900245383408	0.18265539128915267	ridge_arslan_50_alpha_2	L2regression	glm7	sc1	sess	True	arslan_50	cerebellum_suit	True	4	crossed	False	2	Wed Nov 24 01:17:54 2021
514	s14	0.2326691380205901	0.7683249672081148	50	0.3898814882200948	0.2698791534040117	ridge_arslan_50_alpha_2	L2regression	glm7	sc1	sess	True	arslan_50	cerebellum_suit	True	4	crossed	False	2	Wed Nov 24 01:17:55 2021
515	s06	0.20025612593289485	0.8198562175972788	50	0.3635233180422154	0.4077755327822289	ridge_arslan_50_alpha_2	L2regression	glm7	sc1	sess	True	arslan_50	cerebellum_suit	True	4	crossed	False	2	Wed Nov 24 01:17:56 2021
516	s22	0.2349634804047129	0.8455707747528457	50	0.43735774079725065	0.4800553315424945	ridge_arslan_50_alpha_2	L2regression	glm7	sc1	sess	True	arslan_50	cerebellum_suit	True	4	crossed	False	2	Wed Nov 24 01:17:58 2021
517	s21	0.25400785311285684	0.7691954097595755	50	0.4873838530090024	0.010380997054617327	ridge_arslan_50_alpha_2	L2regression	glm7	sc1	sess	True	arslan_50	cerebellum_suit	True	4	crossed	False	2	Wed Nov 24 01:17:59 2021
518	s08	0.3499840020824194	0.5968956538612419	50	0.4457913507708794	0.22081902888504792	ridge_arslan_50_alpha_4	L2regression	glm7	sc1	sess	True	arslan_50	cerebellum_suit	True	4	crossed	False	4	Wed Nov 24 01:18:01 2021
519	s26	0.2785012454664545	0.6599629975167529	50	0.3759057506361307	0.2699091918696405	ridge_arslan_50_alpha_4	L2regression	glm7	sc1	sess	True	arslan_50	cerebellum_suit	True	4	crossed	False	4	Wed Nov 24 01:18:02 2021
520	s04	0.2684149556271033	0.6437192177549955	50	0.3761036330047717	0.21064362655959507	ridge_arslan_50_alpha_4	L2regression	glm7	sc1	sess	True	arslan_50	cerebellum_suit	True	4	crossed	False	4	Wed Nov 24 01:18:03 2021
521	s14	0.27452251491457064	0.6569520734091711	50	0.3638223268683717	0.3012399983403689	ridge_arslan_50_alpha_4	L2regression	glm7	sc1	sess	True	arslan_50	cerebellum_suit	True	4	crossed	False	4	Wed Nov 24 01:18:04 2021
522	s06	0.2378370055709013	0.7351168874220033	50	0.3388333826448865	0.4311381333235595	ridge_arslan_50_alpha_4	L2regression	glm7	sc1	sess	True	arslan_50	cerebellum_suit	True	4	crossed	False	4	Wed Nov 24 01:18:06 2021
523	s22	0.2853341840850016	0.7625038637487297	50	0.411720540460343	0.5003963498377119	ridge_arslan_50_alpha_4	L2regression	glm7	sc1	sess	True	arslan_50	cerebellum_suit	True	4	crossed	False	4	Wed Nov 24 01:18:07 2021
524	s21	0.3083920956020869	0.6359341330259913	50	0.4374047471982575	0.02408728481312255	ridge_arslan_50_alpha_4	L2regression	glm7	sc1	sess	True	arslan_50	cerebellum_suit	True	4	crossed	False	4	Wed Nov 24 01:18:09 2021
525	s08	0.3886824535500529	0.4689010352345995	50	0.4382932969919167	0.19373888894664465	ridge_arslan_50_alpha_6	L2regression	glm7	sc1	sess	True	arslan_50	cerebellum_suit	True	4	crossed	False	6	Wed Nov 24 01:18:10 2021
526	s26	0.31705053055016263	0.5502087841394646	50	0.369110531683594	0.2537466312298485	ridge_arslan_50_alpha_6	L2regression	glm7	sc1	sess	True	arslan_50	cerebellum_suit	True	4	crossed	False	6	Wed Nov 24 01:18:12 2021
527	s04	0.3022698726898597	0.5109383406028111	50	0.3638116473482357	0.22145206036997225	ridge_arslan_50_alpha_6	L2regression	glm7	sc1	sess	True	arslan_50	cerebellum_suit	True	4	crossed	False	6	Wed Nov 24 01:18:13 2021
528	s14	0.3102193678423571	0.5298387935102853	50	0.3569057358593962	0.3096667467586832	ridge_arslan_50_alpha_6	L2regression	glm7	sc1	sess	True	arslan_50	cerebellum_suit	True	4	crossed	False	6	Wed Nov 24 01:18:14 2021
529	s06	0.2750459726406915	0.6495988992862622	50	0.33455695851301204	0.4218143784814644	ridge_arslan_50_alpha_6	L2regression	glm7	sc1	sess	True	arslan_50	cerebellum_suit	True	4	crossed	False	6	Wed Nov 24 01:18:16 2021
530	s22	0.3343973949264743	0.6782633249506933	50	0.4137320200667293	0.4906623226326433	ridge_arslan_50_alpha_6	L2regression	glm7	sc1	sess	True	arslan_50	cerebellum_suit	True	4	crossed	False	6	Wed Nov 24 01:18:17 2021
531	s21	0.35037234361608915	0.4855842990069012	50	0.4133239737973859	0.013520432799159328	ridge_arslan_50_alpha_6	L2regression	glm7	sc1	sess	True	arslan_50	cerebellum_suit	True	4	crossed	False	6	Wed Nov 24 01:18:19 2021
532	s08	0.4118903895128731	0.3255345783059517	50	0.4402857501245889	0.13473882574256502	ridge_arslan_50_alpha_8	L2regression	glm7	sc1	sess	True	arslan_50	cerebellum_suit	True	4	crossed	False	8	Wed Nov 24 01:18:20 2021
533	s26	0.3447003732286644	0.4235090052749244	50	0.3761709520269808	0.2149073311240721	ridge_arslan_50_alpha_8	L2regression	glm7	sc1	sess	True	arslan_50	cerebellum_suit	True	4	crossed	False	8	Wed Nov 24 01:18:21 2021
534	s04	0.32369569076963745	0.3856796333160546	50	0.3676838453577477	0.18765154211417606	ridge_arslan_50_alpha_8	L2regression	glm7	sc1	sess	True	arslan_50	cerebellum_suit	True	4	crossed	False	8	Wed Nov 24 01:18:23 2021
535	s14	0.33489550581529315	0.4050339877467888	50	0.3650193875449554	0.2776226821757493	ridge_arslan_50_alpha_8	L2regression	glm7	sc1	sess	True	arslan_50	cerebellum_suit	True	4	crossed	False	8	Wed Nov 24 01:18:24 2021
536	s06	0.3109043361069553	0.5880804967978959	50	0.3545729492954171	0.3903663376684408	ridge_arslan_50_alpha_8	L2regression	glm7	sc1	sess	True	arslan_50	cerebellum_suit	True	4	crossed	False	8	Wed Nov 24 01:18:25 2021
537	s22	0.3791951848008579	0.6120617189780815	50	0.4478508773034871	0.4541120937343967	ridge_arslan_50_alpha_8	L2regression	glm7	sc1	sess	True	arslan_50	cerebellum_suit	True	4	crossed	False	8	Wed Nov 24 01:18:27 2021
538	s21	0.37265390427370376	0.34481057443596197	50	0.4076395654978688	-0.018183586843106024	ridge_arslan_50_alpha_8	L2regression	glm7	sc1	sess	True	arslan_50	cerebellum_suit	True	4	crossed	False	8	Wed Nov 24 01:18:28 2021
539	s08	0.4198177619160601	0.2665611820901659	50	0.4412691030810395	0.11223881821255577	ridge_arslan_50_alpha_10	L2regression	glm7	sc1	sess	True	arslan_50	cerebellum_suit	True	4	crossed	False	10	Wed Nov 24 01:18:30 2021
540	s26	0.35442858320041337	0.3649887440580877	50	0.3804812263264653	0.1972341773177599	ridge_arslan_50_alpha_10	L2regression	glm7	sc1	sess	True	arslan_50	cerebellum_suit	True	4	crossed	False	10	Wed Nov 24 01:18:31 2021
541	s04	0.3326584655038779	0.33401032054449004	50	0.3715325972992877	0.16991049939349684	ridge_arslan_50_alpha_10	L2regression	glm7	sc1	sess	True	arslan_50	cerebellum_suit	True	4	crossed	False	10	Wed Nov 24 01:18:32 2021
542	s14	0.34735399492931684	0.3621156259113675	50	0.3726358992901016	0.2640367615207828	ridge_arslan_50_alpha_10	L2regression	glm7	sc1	sess	True	arslan_50	cerebellum_suit	True	4	crossed	False	10	Wed Nov 24 01:18:34 2021
543	s06	0.3257167443320848	0.5641183474754868	50	0.3648612631893746	0.3756357153581728	ridge_arslan_50_alpha_10	L2regression	glm7	sc1	sess	True	arslan_50	cerebellum_suit	True	4	crossed	False	10	Wed Nov 24 01:18:35 2021
544	s22	0.3972185455458644	0.5808336861053827	50	0.4638535645690064	0.4335326921267227	ridge_arslan_50_alpha_10	L2regression	glm7	sc1	sess	True	arslan_50	cerebellum_suit	True	4	crossed	False	10	Wed Nov 24 01:18:37 2021
545	s21	0.3795663171354376	0.2880625073853637	50	0.4062920460601375	-0.02787441702133384	ridge_arslan_50_alpha_10	L2regression	glm7	sc1	sess	True	arslan_50	cerebellum_suit	True	4	crossed	False	10	Wed Nov 24 01:18:38 2021
546	s08	0.015924023553121988	0.9993958675520942	250	0.5938169109340895	0.1865294157075892	ridge_arslan_250_alpha_-2	L2regression	glm7	sc1	sess	True	arslan_250	cerebellum_suit	True	4	crossed	False	-2	Wed Nov 24 01:16:15 2021
547	s26	0.01207092771747245	0.9995214924227664	250	0.48591296348789503	0.26072125508438204	ridge_arslan_250_alpha_-2	L2regression	glm7	sc1	sess	True	arslan_250	cerebellum_suit	True	4	crossed	False	-2	Wed Nov 24 01:16:16 2021
548	s04	0.009179496799909892	0.9996930484600388	250	0.4800040328826036	0.19213867532602147	ridge_arslan_250_alpha_-2	L2regression	glm7	sc1	sess	True	arslan_250	cerebellum_suit	True	4	crossed	False	-2	Wed Nov 24 01:16:17 2021
549	s14	0.01552561809810009	0.9991578368188242	250	0.5051373567034514	0.20609592264432747	ridge_arslan_250_alpha_-2	L2regression	glm7	sc1	sess	True	arslan_250	cerebellum_suit	True	4	crossed	False	-2	Wed Nov 24 01:16:19 2021
550	s06	0.00972255685349927	0.9996484428402884	250	0.4443849639791597	0.3580921685439255	ridge_arslan_250_alpha_-2	L2regression	glm7	sc1	sess	True	arslan_250	cerebellum_suit	True	4	crossed	False	-2	Wed Nov 24 01:16:20 2021
551	s22	0.00862559906308553	0.9998249905931892	250	0.5140834176810966	0.4213552812566562	ridge_arslan_250_alpha_-2	L2regression	glm7	sc1	sess	True	arslan_250	cerebellum_suit	True	4	crossed	False	-2	Wed Nov 24 01:16:21 2021
552	s21	0.009217451232515805	0.9997436341378416	250	0.5957218817904893	0.03012124786981328	ridge_arslan_250_alpha_-2	L2regression	glm7	sc1	sess	True	arslan_250	cerebellum_suit	True	4	crossed	False	-2	Wed Nov 24 01:16:23 2021
553	s08	0.06482911109273927	0.9899429909154392	250	0.5600360995213715	0.20036426315939773	ridge_arslan_250_alpha_0	L2regression	glm7	sc1	sess	True	arslan_250	cerebellum_suit	True	4	crossed	False	0	Wed Nov 24 01:16:24 2021
554	s26	0.05188367325278	0.99103798103535	250	0.4563547944963596	0.2733607071260884	ridge_arslan_250_alpha_0	L2regression	glm7	sc1	sess	True	arslan_250	cerebellum_suit	True	4	crossed	False	0	Wed Nov 24 01:16:25 2021
555	s04	0.03953550756427746	0.9943535235996606	250	0.4538700581940153	0.20978844205218394	ridge_arslan_250_alpha_0	L2regression	glm7	sc1	sess	True	arslan_250	cerebellum_suit	True	4	crossed	False	0	Wed Nov 24 01:16:26 2021
556	s14	0.059835349165282825	0.9871985539371614	250	0.4674452137654663	0.2268258452769706	ridge_arslan_250_alpha_0	L2regression	glm7	sc1	sess	True	arslan_250	cerebellum_suit	True	4	crossed	False	0	Wed Nov 24 01:16:28 2021
557	s06	0.041535597138808326	0.9935214813492608	250	0.4174641618709983	0.3807330752228865	ridge_arslan_250_alpha_0	L2regression	glm7	sc1	sess	True	arslan_250	cerebellum_suit	True	4	crossed	False	0	Wed Nov 24 01:16:29 2021
558	s22	0.04122663493804956	0.9959888354980416	250	0.4946163297336521	0.43539341445812985	ridge_arslan_250_alpha_0	L2regression	glm7	sc1	sess	True	arslan_250	cerebellum_suit	True	4	crossed	False	0	Wed Nov 24 01:16:30 2021
559	s21	0.04202128220632091	0.9947367191306272	250	0.5665792247713795	0.03220911602091578	ridge_arslan_250_alpha_0	L2regression	glm7	sc1	sess	True	arslan_250	cerebellum_suit	True	4	crossed	False	0	Wed Nov 24 01:16:31 2021
560	s08	0.15034088785509284	0.9453442133201015	250	0.5123460061962896	0.2141840471698701	ridge_arslan_250_alpha_2	L2regression	glm7	sc1	sess	True	arslan_250	cerebellum_suit	True	4	crossed	False	2	Wed Nov 24 01:16:33 2021
561	s26	0.12239047321116432	0.9486266192630001	250	0.4171232476726732	0.2890515201618963	ridge_arslan_250_alpha_2	L2regression	glm7	sc1	sess	True	arslan_250	cerebellum_suit	True	4	crossed	False	2	Wed Nov 24 01:16:34 2021
562	s04	0.09608268408602676	0.9666749505792688	250	0.4167888347191596	0.2381041901587896	ridge_arslan_250_alpha_2	L2regression	glm7	sc1	sess	True	arslan_250	cerebellum_suit	True	4	crossed	False	2	Wed Nov 24 01:16:35 2021
563	s14	0.1259401909687505	0.9421703895586484	250	0.4228936704754381	0.250730738889952	ridge_arslan_250_alpha_2	L2regression	glm7	sc1	sess	True	arslan_250	cerebellum_suit	True	4	crossed	False	2	Wed Nov 24 01:16:36 2021
564	s06	0.09666194616939952	0.9640575121317876	250	0.3781387976505153	0.4156679875217549	ridge_arslan_250_alpha_2	L2regression	glm7	sc1	sess	True	arslan_250	cerebellum_suit	True	4	crossed	False	2	Wed Nov 24 01:16:38 2021
565	s22	0.10913187991837216	0.9712266993211394	250	0.4626972414873808	0.4590357250859719	ridge_arslan_250_alpha_2	L2regression	glm7	sc1	sess	True	arslan_250	cerebellum_suit	True	4	crossed	False	2	Wed Nov 24 01:16:39 2021
566	s21	0.10719787244994702	0.9665034253776076	250	0.5172997566076061	0.027550322269547185	ridge_arslan_250_alpha_2	L2regression	glm7	sc1	sess	True	arslan_250	cerebellum_suit	True	4	crossed	False	2	Wed Nov 24 01:16:40 2021
567	s08	0.2523076150920592	0.8356552078469952	250	0.4720368047584077	0.2161920742370569	ridge_arslan_250_alpha_4	L2regression	glm7	sc1	sess	True	arslan_250	cerebellum_suit	True	4	crossed	False	4	Wed Nov 24 01:16:41 2021
568	s26	0.2012214834036392	0.8505155398688057	250	0.3887950000214388	0.2940712640122282	ridge_arslan_250_alpha_4	L2regression	glm7	sc1	sess	True	arslan_250	cerebellum_suit	True	4	crossed	False	4	Wed Nov 24 01:16:42 2021
569	s04	0.17089380237237514	0.8920163208952698	250	0.38660770596988936	0.2565193523225953	ridge_arslan_250_alpha_4	L2regression	glm7	sc1	sess	True	arslan_250	cerebellum_suit	True	4	crossed	False	4	Wed Nov 24 01:16:44 2021
570	s14	0.1992260487251876	0.8488012251741609	250	0.3903297545125968	0.26781233456943604	ridge_arslan_250_alpha_4	L2regression	glm7	sc1	sess	True	arslan_250	cerebellum_suit	True	4	crossed	False	4	Wed Nov 24 01:16:45 2021
571	s06	0.16023537851279107	0.8976905171182321	250	0.3516709089719622	0.4343082355222783	ridge_arslan_250_alpha_4	L2regression	glm7	sc1	sess	True	arslan_250	cerebellum_suit	True	4	crossed	False	4	Wed Nov 24 01:16:46 2021
572	s22	0.19468453939468905	0.9032872061513636	250	0.4365331916651541	0.4761349645954344	ridge_arslan_250_alpha_4	L2regression	glm7	sc1	sess	True	arslan_250	cerebellum_suit	True	4	crossed	False	4	Wed Nov 24 01:16:47 2021
573	s21	0.19576730847214405	0.8876413014897995	250	0.4725745917139542	0.0277796841808566	ridge_arslan_250_alpha_4	L2regression	glm7	sc1	sess	True	arslan_250	cerebellum_suit	True	4	crossed	False	4	Wed Nov 24 01:16:49 2021
574	s08	0.33746170014844795	0.6656144092922277	250	0.4417112722973176	0.22058077580947053	ridge_arslan_250_alpha_6	L2regression	glm7	sc1	sess	True	arslan_250	cerebellum_suit	True	4	crossed	False	6	Wed Nov 24 01:16:50 2021
575	s26	0.2686344792511101	0.7128865826554495	250	0.3700841508271612	0.28363508854931524	ridge_arslan_250_alpha_6	L2regression	glm7	sc1	sess	True	arslan_250	cerebellum_suit	True	4	crossed	False	6	Wed Nov 24 01:16:52 2021
576	s04	0.24896580590358025	0.7414175706056455	250	0.36475682122922265	0.2617998273096205	ridge_arslan_250_alpha_6	L2regression	glm7	sc1	sess	True	arslan_250	cerebellum_suit	True	4	crossed	False	6	Wed Nov 24 01:16:53 2021
577	s14	0.265717363518072	0.7019150490827252	250	0.3624369379075286	0.2999690224058042	ridge_arslan_250_alpha_6	L2regression	glm7	sc1	sess	True	arslan_250	cerebellum_suit	True	4	crossed	False	6	Wed Nov 24 01:16:54 2021
578	s06	0.2252586802612607	0.7835690580174763	250	0.3338772726937022	0.43935419596892267	ridge_arslan_250_alpha_6	L2regression	glm7	sc1	sess	True	arslan_250	cerebellum_suit	True	4	crossed	False	6	Wed Nov 24 01:16:55 2021
579	s22	0.2746550944330639	0.7948350167627157	250	0.4123527728974309	0.4919715817075769	ridge_arslan_250_alpha_6	L2regression	glm7	sc1	sess	True	arslan_250	cerebellum_suit	True	4	crossed	False	6	Wed Nov 24 01:16:57 2021
580	s21	0.2865340332667566	0.7376879036935544	250	0.4271578527138314	0.05107783871518897	ridge_arslan_250_alpha_6	L2regression	glm7	sc1	sess	True	arslan_250	cerebellum_suit	True	4	crossed	False	6	Wed Nov 24 01:16:58 2021
581	s08	0.3902422738626907	0.4932469664586933	250	0.4380002323349513	0.18394408618303848	ridge_arslan_250_alpha_8	L2regression	glm7	sc1	sess	True	arslan_250	cerebellum_suit	True	4	crossed	False	8	Wed Nov 24 01:16:59 2021
582	s26	0.3198922849209241	0.570725816895989	250	0.36981673559833694	0.2528501955359637	ridge_arslan_250_alpha_8	L2regression	glm7	sc1	sess	True	arslan_250	cerebellum_suit	True	4	crossed	False	8	Wed Nov 24 01:17:01 2021
583	s04	0.30119968949286	0.5581195674674261	250	0.3619605455726224	0.24032768562014514	ridge_arslan_250_alpha_8	L2regression	glm7	sc1	sess	True	arslan_250	cerebellum_suit	True	4	crossed	False	8	Wed Nov 24 01:17:02 2021
584	s14	0.3122562465375083	0.54102516043307	250	0.3581863374233263	0.30425949576754785	ridge_arslan_250_alpha_8	L2regression	glm7	sc1	sess	True	arslan_250	cerebellum_suit	True	4	crossed	False	8	Wed Nov 24 01:17:04 2021
585	s06	0.2786855552630592	0.6776155455320093	250	0.338071511963604	0.4239884251199101	ridge_arslan_250_alpha_8	L2regression	glm7	sc1	sess	True	arslan_250	cerebellum_suit	True	4	crossed	False	8	Wed Nov 24 01:17:05 2021
586	s22	0.34026717910865145	0.7018933503193379	250	0.42446305069839496	0.4752160978543022	ridge_arslan_250_alpha_8	L2regression	glm7	sc1	sess	True	arslan_250	cerebellum_suit	True	4	crossed	False	8	Wed Nov 24 01:17:07 2021
587	s21	0.3482468670485572	0.5602515796605639	250	0.40905867507220495	0.037346119950949885	ridge_arslan_250_alpha_8	L2regression	glm7	sc1	sess	True	arslan_250	cerebellum_suit	True	4	crossed	False	8	Wed Nov 24 01:17:08 2021
588	s08	0.4137762285642228	0.3392199197782959	250	0.4403490357185344	0.13342280329594358	ridge_arslan_250_alpha_10	L2regression	glm7	sc1	sess	True	arslan_250	cerebellum_suit	True	4	crossed	False	10	Wed Nov 24 01:17:10 2021
589	s26	0.3473666422234968	0.4461651960370344	250	0.3776606419399003	0.2170815448844129	ridge_arslan_250_alpha_10	L2regression	glm7	sc1	sess	True	arslan_250	cerebellum_suit	True	4	crossed	False	10	Wed Nov 24 01:17:11 2021
590	s04	0.32571482835800564	0.4094379127071435	250	0.3686042264495145	0.1977205446312428	ridge_arslan_250_alpha_10	L2regression	glm7	sc1	sess	True	arslan_250	cerebellum_suit	True	4	crossed	False	10	Wed Nov 24 01:17:13 2021
591	s14	0.3383134570884369	0.4128706525118183	250	0.3676166471716694	0.2734136120739566	ridge_arslan_250_alpha_10	L2regression	glm7	sc1	sess	True	arslan_250	cerebellum_suit	True	4	crossed	False	10	Wed Nov 24 01:17:14 2021
592	s06	0.3159054174107201	0.6185442680763772	250	0.35894370236843137	0.3953400632103543	ridge_arslan_250_alpha_10	L2regression	glm7	sc1	sess	True	arslan_250	cerebellum_suit	True	4	crossed	False	10	Wed Nov 24 01:17:15 2021
593	s22	0.3856320468914128	0.6407405984402571	250	0.4560690961308155	0.435915425531182	ridge_arslan_250_alpha_10	L2regression	glm7	sc1	sess	True	arslan_250	cerebellum_suit	True	4	crossed	False	10	Wed Nov 24 01:17:17 2021
594	s21	0.373817401570701	0.4118622412002672	250	0.40640581552654464	0.008504284699891703	ridge_arslan_250_alpha_10	L2regression	glm7	sc1	sess	True	arslan_250	cerebellum_suit	True	4	crossed	False	10	Wed Nov 24 01:17:18 2021
595	s08	0.025052390099447448	0.9984768799356484	200	0.5975129025896837	0.1800142377713893	ridge_arslan_200_alpha_-2	L2regression	glm7	sc1	sess	True	arslan_200	cerebellum_suit	True	4	crossed	False	-2	Wed Nov 24 01:15:03 2021
596	s26	0.02154806850773744	0.9984178195435424	200	0.5093621425733248	0.21762982339200065	ridge_arslan_200_alpha_-2	L2regression	glm7	sc1	sess	True	arslan_200	cerebellum_suit	True	4	crossed	False	-2	Wed Nov 24 01:15:04 2021
597	s04	0.016270683070358092	0.9990124357552804	200	0.4999262942523955	0.1597394850000005	ridge_arslan_200_alpha_-2	L2regression	glm7	sc1	sess	True	arslan_200	cerebellum_suit	True	4	crossed	False	-2	Wed Nov 24 01:15:05 2021
598	s14	0.02686859290718888	0.997383159913995	200	0.5255330113618429	0.2010907585026261	ridge_arslan_200_alpha_-2	L2regression	glm7	sc1	sess	True	arslan_200	cerebellum_suit	True	4	crossed	False	-2	Wed Nov 24 01:15:07 2021
599	s06	0.017982235657547474	0.9987611609213022	200	0.4498155867644617	0.3561838139491679	ridge_arslan_200_alpha_-2	L2regression	glm7	sc1	sess	True	arslan_200	cerebellum_suit	True	4	crossed	False	-2	Wed Nov 24 01:15:08 2021
600	s22	0.016130323154161488	0.9993778245402514	200	0.5391938304835129	0.40899022859889056	ridge_arslan_200_alpha_-2	L2regression	glm7	sc1	sess	True	arslan_200	cerebellum_suit	True	4	crossed	False	-2	Wed Nov 24 01:15:09 2021
601	s21	0.015289436132808731	0.9992920259864074	200	0.6013147606837358	0.052572301544988	ridge_arslan_200_alpha_-2	L2regression	glm7	sc1	sess	True	arslan_200	cerebellum_suit	True	4	crossed	False	-2	Wed Nov 24 01:15:11 2021
602	s08	0.08469982177585396	0.9823829406960922	200	0.5555272786264482	0.19453164362644573	ridge_arslan_200_alpha_0	L2regression	glm7	sc1	sess	True	arslan_200	cerebellum_suit	True	4	crossed	False	0	Wed Nov 24 01:15:12 2021
603	s26	0.0723463362560327	0.9820111086610921	200	0.4675264209005737	0.24445081787120426	ridge_arslan_200_alpha_0	L2regression	glm7	sc1	sess	True	arslan_200	cerebellum_suit	True	4	crossed	False	0	Wed Nov 24 01:15:13 2021
604	s04	0.055385029042848206	0.9886680652379041	200	0.4594458847360246	0.18912377631540145	ridge_arslan_200_alpha_0	L2regression	glm7	sc1	sess	True	arslan_200	cerebellum_suit	True	4	crossed	False	0	Wed Nov 24 01:15:14 2021
605	s14	0.07965646074431308	0.9765990065714928	200	0.4683612543911626	0.2275839917284096	ridge_arslan_200_alpha_0	L2regression	glm7	sc1	sess	True	arslan_200	cerebellum_suit	True	4	crossed	False	0	Wed Nov 24 01:15:16 2021
606	s06	0.05818039812263792	0.9870073542880392	200	0.41167384460758494	0.3857586342977218	ridge_arslan_200_alpha_0	L2regression	glm7	sc1	sess	True	arslan_200	cerebellum_suit	True	4	crossed	False	0	Wed Nov 24 01:15:17 2021
607	s22	0.06080480454501558	0.9910359042186516	200	0.5047311050977229	0.42961221111512105	ridge_arslan_200_alpha_0	L2regression	glm7	sc1	sess	True	arslan_200	cerebellum_suit	True	4	crossed	False	0	Wed Nov 24 01:15:18 2021
608	s21	0.05725340337964763	0.9901707547195348	200	0.5614619893525735	0.04609059560289405	ridge_arslan_200_alpha_0	L2regression	glm7	sc1	sess	True	arslan_200	cerebellum_suit	True	4	crossed	False	0	Wed Nov 24 01:15:20 2021
609	s08	0.17133785206633545	0.9275912274892066	200	0.510570203588121	0.20342576523352554	ridge_arslan_200_alpha_2	L2regression	glm7	sc1	sess	True	arslan_200	cerebellum_suit	True	4	crossed	False	2	Wed Nov 24 01:15:21 2021
610	s26	0.14392929816613645	0.9261151005077016	200	0.4220703320443738	0.273243678997624	ridge_arslan_200_alpha_2	L2regression	glm7	sc1	sess	True	arslan_200	cerebellum_suit	True	4	crossed	False	2	Wed Nov 24 01:15:22 2021
611	s04	0.1140189471829282	0.9521012823314466	200	0.41808690659073067	0.2268191341435896	ridge_arslan_200_alpha_2	L2regression	glm7	sc1	sess	True	arslan_200	cerebellum_suit	True	4	crossed	False	2	Wed Nov 24 01:15:23 2021
612	s14	0.14421246713465716	0.9226065579533772	200	0.4205145456417574	0.250199952736207	ridge_arslan_200_alpha_2	L2regression	glm7	sc1	sess	True	arslan_200	cerebellum_suit	True	4	crossed	False	2	Wed Nov 24 01:15:24 2021
613	s06	0.11362747297009315	0.9495660674931964	200	0.3739055513739719	0.4180034061490389	ridge_arslan_200_alpha_2	L2regression	glm7	sc1	sess	True	arslan_200	cerebellum_suit	True	4	crossed	False	2	Wed Nov 24 01:15:26 2021
614	s22	0.131048005799752	0.9573954337698952	200	0.4662442220965856	0.4534963930004714	ridge_arslan_200_alpha_2	L2regression	glm7	sc1	sess	True	arslan_200	cerebellum_suit	True	4	crossed	False	2	Wed Nov 24 01:15:27 2021
615	s21	0.1257056240425859	0.95348731672912	200	0.5117554596951832	0.02923751025037369	ridge_arslan_200_alpha_2	L2regression	glm7	sc1	sess	True	arslan_200	cerebellum_suit	True	4	crossed	False	2	Wed Nov 24 01:15:28 2021
616	s08	0.2704476708471036	0.8036075582026696	200	0.4688975103368976	0.2132582534928873	ridge_arslan_200_alpha_4	L2regression	glm7	sc1	sess	True	arslan_200	cerebellum_suit	True	4	crossed	False	4	Wed Nov 24 01:15:29 2021
617	s26	0.2169447184069976	0.8194004884169785	200	0.3888481942772259	0.2855818843824713	ridge_arslan_200_alpha_4	L2regression	glm7	sc1	sess	True	arslan_200	cerebellum_suit	True	4	crossed	False	4	Wed Nov 24 01:15:30 2021
618	s04	0.18843128444865034	0.8639258900436393	200	0.38685093479773297	0.2448188407091464	ridge_arslan_200_alpha_4	L2regression	glm7	sc1	sess	True	arslan_200	cerebellum_suit	True	4	crossed	False	4	Wed Nov 24 01:15:32 2021
619	s14	0.21471094253801853	0.8176707292370982	200	0.3871349574500162	0.2701357886124371	ridge_arslan_200_alpha_4	L2regression	glm7	sc1	sess	True	arslan_200	cerebellum_suit	True	4	crossed	False	4	Wed Nov 24 01:15:33 2021
620	s06	0.1766092335559956	0.8718482231471117	200	0.3506199156417984	0.43309674621366107	ridge_arslan_200_alpha_4	L2regression	glm7	sc1	sess	True	arslan_200	cerebellum_suit	True	4	crossed	False	4	Wed Nov 24 01:15:34 2021
621	s22	0.21326068111529764	0.8804210296492829	200	0.4371731858148309	0.4730337453441121	ridge_arslan_200_alpha_4	L2regression	glm7	sc1	sess	True	arslan_200	cerebellum_suit	True	4	crossed	False	4	Wed Nov 24 01:15:35 2021
622	s21	0.2147848226200257	0.8603772977346701	200	0.4683176407104991	0.027850186348120254	ridge_arslan_200_alpha_4	L2regression	glm7	sc1	sess	True	arslan_200	cerebellum_suit	True	4	crossed	False	4	Wed Nov 24 01:15:37 2021
623	s08	0.3473564939833135	0.6332446662566522	200	0.4403306838559641	0.22079218585913565	ridge_arslan_200_alpha_6	L2regression	glm7	sc1	sess	True	arslan_200	cerebellum_suit	True	4	crossed	False	6	Wed Nov 24 01:15:38 2021
624	s26	0.277569638502386	0.6858289049611707	200	0.3697666770559053	0.2777964681227349	ridge_arslan_200_alpha_6	L2regression	glm7	sc1	sess	True	arslan_200	cerebellum_suit	True	4	crossed	False	6	Wed Nov 24 01:15:39 2021
625	s04	0.2603270447041786	0.7041851920355809	200	0.3649988474802706	0.2503796081339779	ridge_arslan_200_alpha_6	L2regression	glm7	sc1	sess	True	arslan_200	cerebellum_suit	True	4	crossed	False	6	Wed Nov 24 01:15:40 2021
626	s14	0.2740198315518156	0.6742057484339308	200	0.3604590469610568	0.3045179013816975	ridge_arslan_200_alpha_6	L2regression	glm7	sc1	sess	True	arslan_200	cerebellum_suit	True	4	crossed	False	6	Wed Nov 24 01:15:41 2021
627	s06	0.2354502650268987	0.7563976289150058	200	0.33318196014956475	0.4384754232164743	ridge_arslan_200_alpha_6	L2regression	glm7	sc1	sess	True	arslan_200	cerebellum_suit	True	4	crossed	False	6	Wed Nov 24 01:15:43 2021
628	s22	0.28607126141230965	0.772581897022723	200	0.41249839252715337	0.4895466785383671	ridge_arslan_200_alpha_6	L2regression	glm7	sc1	sess	True	arslan_200	cerebellum_suit	True	4	crossed	False	6	Wed Nov 24 01:15:44 2021
629	s21	0.29908555009955623	0.7013062245878096	200	0.4245147175491571	0.04883255735787729	ridge_arslan_200_alpha_6	L2regression	glm7	sc1	sess	True	arslan_200	cerebellum_suit	True	4	crossed	False	6	Wed Nov 24 01:15:45 2021
630	s08	0.3945308644764697	0.4678007796245682	200	0.438306034091122	0.17938209936206273	ridge_arslan_200_alpha_8	L2regression	glm7	sc1	sess	True	arslan_200	cerebellum_suit	True	4	crossed	False	8	Wed Nov 24 01:15:47 2021
631	s26	0.3247204039513765	0.5490520222900018	200	0.37080281223945055	0.2464403729681543	ridge_arslan_200_alpha_8	L2regression	glm7	sc1	sess	True	arslan_200	cerebellum_suit	True	4	crossed	False	8	Wed Nov 24 01:15:48 2021
632	s04	0.3062601234218602	0.5237190713711705	200	0.3631588679047582	0.2280582523429999	ridge_arslan_200_alpha_8	L2regression	glm7	sc1	sess	True	arslan_200	cerebellum_suit	True	4	crossed	False	8	Wed Nov 24 01:15:49 2021
633	s14	0.3163043406172797	0.5197716012964283	200	0.35881856799984146	0.3024382956199671	ridge_arslan_200_alpha_8	L2regression	glm7	sc1	sess	True	arslan_200	cerebellum_suit	True	4	crossed	False	8	Wed Nov 24 01:15:50 2021
634	s06	0.2842329002775538	0.6619787287938376	200	0.3400744131570609	0.4212496443600212	ridge_arslan_200_alpha_8	L2regression	glm7	sc1	sess	True	arslan_200	cerebellum_suit	True	4	crossed	False	8	Wed Nov 24 01:15:52 2021
635	s22	0.3470941359966408	0.6864786948720181	200	0.427217402668154	0.4726728948363303	ridge_arslan_200_alpha_8	L2regression	glm7	sc1	sess	True	arslan_200	cerebellum_suit	True	4	crossed	False	8	Wed Nov 24 01:15:53 2021
636	s21	0.3535171256058398	0.5260069384522996	200	0.4087067991232395	0.031841327740705284	ridge_arslan_200_alpha_8	L2regression	glm7	sc1	sess	True	arslan_200	cerebellum_suit	True	4	crossed	False	8	Wed Nov 24 01:15:54 2021
637	s08	0.4150826791821979	0.3277225295777144	200	0.4404884013365127	0.1306853954660904	ridge_arslan_200_alpha_10	L2regression	glm7	sc1	sess	True	arslan_200	cerebellum_suit	True	4	crossed	False	10	Wed Nov 24 01:15:56 2021
638	s26	0.3489621351026645	0.4338733584716775	200	0.3782762871809756	0.21294809509707607	ridge_arslan_200_alpha_10	L2regression	glm7	sc1	sess	True	arslan_200	cerebellum_suit	True	4	crossed	False	10	Wed Nov 24 01:15:57 2021
639	s04	0.32727913874662085	0.39050022392794975	200	0.3692384833561261	0.1897378209403412	ridge_arslan_200_alpha_10	L2regression	glm7	sc1	sess	True	arslan_200	cerebellum_suit	True	4	crossed	False	10	Wed Nov 24 01:15:58 2021
640	s14	0.34006911967340503	0.4045639509534877	200	0.3685285146160593	0.27228550207438496	ridge_arslan_200_alpha_10	L2regression	glm7	sc1	sess	True	arslan_200	cerebellum_suit	True	4	crossed	False	10	Wed Nov 24 01:15:59 2021
641	s06	0.3179629276084198	0.6113899722599858	200	0.3600897878226098	0.3956009476533881	ridge_arslan_200_alpha_10	L2regression	glm7	sc1	sess	True	arslan_200	cerebellum_suit	True	4	crossed	False	10	Wed Nov 24 01:16:01 2021
642	s22	0.38804674660977095	0.6332354525194059	200	0.4573839179213592	0.4396958134996968	ridge_arslan_200_alpha_10	L2regression	glm7	sc1	sess	True	arslan_200	cerebellum_suit	True	4	crossed	False	10	Wed Nov 24 01:16:02 2021
643	s21	0.3751494322174585	0.392469731336954	200	0.4063479622666374	0.006161023209321144	ridge_arslan_200_alpha_10	L2regression	glm7	sc1	sess	True	arslan_200	cerebellum_suit	True	4	crossed	False	10	Wed Nov 24 01:16:03 2021
644	s08	0.09639521899647543	0.9754447872310535	100	0.6305329762498298	0.17167900312602635	ridge_arslan_100_alpha_-2	L2regression	glm7	sc1	sess	True	arslan_100	cerebellum_suit	True	4	crossed	False	-2	Wed Nov 24 01:13:54 2021
645	s26	0.08452128225875427	0.9735013556050726	100	0.5584715591641335	0.1834625395504937	ridge_arslan_100_alpha_-2	L2regression	glm7	sc1	sess	True	arslan_100	cerebellum_suit	True	4	crossed	False	-2	Wed Nov 24 01:13:55 2021
646	s04	0.06515206095683691	0.983013014103071	100	0.5290479214592686	0.15986673228724466	ridge_arslan_100_alpha_-2	L2regression	glm7	sc1	sess	True	arslan_100	cerebellum_suit	True	4	crossed	False	-2	Wed Nov 24 01:13:56 2021
647	s14	0.08443092664064722	0.972508358574003	100	0.5181540065773979	0.19409305576971164	ridge_arslan_100_alpha_-2	L2regression	glm7	sc1	sess	True	arslan_100	cerebellum_suit	True	4	crossed	False	-2	Wed Nov 24 01:13:58 2021
648	s06	0.06743258278243618	0.9817538197274028	100	0.4588827901893536	0.3447347757146369	ridge_arslan_100_alpha_-2	L2regression	glm7	sc1	sess	True	arslan_100	cerebellum_suit	True	4	crossed	False	-2	Wed Nov 24 01:13:59 2021
649	s22	0.07661695706166037	0.9848553973962584	100	0.5763774104337845	0.3874037605896145	ridge_arslan_100_alpha_-2	L2regression	glm7	sc1	sess	True	arslan_100	cerebellum_suit	True	4	crossed	False	-2	Wed Nov 24 01:14:00 2021
650	s21	0.0711704720089008	0.983598917616156	100	0.6499333209069986	0.03437212115894532	ridge_arslan_100_alpha_-2	L2regression	glm7	sc1	sess	True	arslan_100	cerebellum_suit	True	4	crossed	False	-2	Wed Nov 24 01:14:01 2021
651	s08	0.163650434743897	0.9291617541066188	100	0.5474852485826995	0.21110136275755387	ridge_arslan_100_alpha_0	L2regression	glm7	sc1	sess	True	arslan_100	cerebellum_suit	True	4	crossed	False	0	Wed Nov 24 01:14:02 2021
652	s26	0.13939521513186565	0.9275924039710862	100	0.4783031747653799	0.21077018624048285	ridge_arslan_100_alpha_0	L2regression	glm7	sc1	sess	True	arslan_100	cerebellum_suit	True	4	crossed	False	0	Wed Nov 24 01:14:04 2021
653	s04	0.10584067386767904	0.9561240550436614	100	0.4500231761127961	0.20293012192739496	ridge_arslan_100_alpha_0	L2regression	glm7	sc1	sess	True	arslan_100	cerebellum_suit	True	4	crossed	False	0	Wed Nov 24 01:14:05 2021
654	s14	0.1329526643499938	0.9316864151418172	100	0.4467800448102233	0.239382234825654	ridge_arslan_100_alpha_0	L2regression	glm7	sc1	sess	True	arslan_100	cerebellum_suit	True	4	crossed	False	0	Wed Nov 24 01:14:06 2021
655	s06	0.10871383603888776	0.9524468224222008	100	0.3991036125201385	0.3885765208000314	ridge_arslan_100_alpha_0	L2regression	glm7	sc1	sess	True	arslan_100	cerebellum_suit	True	4	crossed	False	0	Wed Nov 24 01:14:07 2021
656	s22	0.12597957180356306	0.9591408480994172	100	0.4941401239416881	0.4377950186832709	ridge_arslan_100_alpha_0	L2regression	glm7	sc1	sess	True	arslan_100	cerebellum_suit	True	4	crossed	False	0	Wed Nov 24 01:14:08 2021
657	s21	0.12179808768170773	0.9525044823079228	100	0.5612676872292421	0.028719550945301837	ridge_arslan_100_alpha_0	L2regression	glm7	sc1	sess	True	arslan_100	cerebellum_suit	True	4	crossed	False	0	Wed Nov 24 01:14:09 2021
658	s08	0.2434934656874428	0.8376679483845084	100	0.4916422569378649	0.22519342493196665	ridge_arslan_100_alpha_2	L2regression	glm7	sc1	sess	True	arslan_100	cerebellum_suit	True	4	crossed	False	2	Wed Nov 24 01:14:11 2021
659	s26	0.20009032057912726	0.8432779350770464	100	0.4210992607329509	0.2461555221480892	ridge_arslan_100_alpha_2	L2regression	glm7	sc1	sess	True	arslan_100	cerebellum_suit	True	4	crossed	False	2	Wed Nov 24 01:14:12 2021
660	s04	0.16361716293466075	0.8946079491656476	100	0.4093687147944989	0.22177571020530226	ridge_arslan_100_alpha_2	L2regression	glm7	sc1	sess	True	arslan_100	cerebellum_suit	True	4	crossed	False	2	Wed Nov 24 01:14:13 2021
661	s14	0.1896738425894154	0.8578240558219237	100	0.4031777483282519	0.2669768395865349	ridge_arslan_100_alpha_2	L2regression	glm7	sc1	sess	True	arslan_100	cerebellum_suit	True	4	crossed	False	2	Wed Nov 24 01:14:14 2021
662	s06	0.15903648619442504	0.8947293530993152	100	0.36853464081592335	0.4148917176819353	ridge_arslan_100_alpha_2	L2regression	glm7	sc1	sess	True	arslan_100	cerebellum_suit	True	4	crossed	False	2	Wed Nov 24 01:14:15 2021
663	s22	0.18898198752448792	0.9056359087649216	100	0.4538336552211032	0.4643145832124296	ridge_arslan_100_alpha_2	L2regression	glm7	sc1	sess	True	arslan_100	cerebellum_suit	True	4	crossed	False	2	Wed Nov 24 01:14:17 2021
664	s21	0.1885553638452294	0.8868388739684454	100	0.5026683283394836	0.021604672362669462	ridge_arslan_100_alpha_2	L2regression	glm7	sc1	sess	True	arslan_100	cerebellum_suit	True	4	crossed	False	2	Wed Nov 24 01:14:18 2021
665	s08	0.3181265180505597	0.6944013151249451	100	0.4527022687146366	0.2307873145344384	ridge_arslan_100_alpha_4	L2regression	glm7	sc1	sess	True	arslan_100	cerebellum_suit	True	4	crossed	False	4	Wed Nov 24 01:14:19 2021
666	s26	0.2534854462571301	0.7324163327260454	100	0.3827796636046369	0.2753418728193494	ridge_arslan_100_alpha_4	L2regression	glm7	sc1	sess	True	arslan_100	cerebellum_suit	True	4	crossed	False	4	Wed Nov 24 01:14:20 2021
667	s04	0.2322862517351776	0.7692215553556697	100	0.379814542450302	0.2317491616839949	ridge_arslan_100_alpha_4	L2regression	glm7	sc1	sess	True	arslan_100	cerebellum_suit	True	4	crossed	False	4	Wed Nov 24 01:14:21 2021
668	s14	0.2483973079204127	0.7379256475690877	100	0.3715898444234132	0.2931055288341703	ridge_arslan_100_alpha_4	L2regression	glm7	sc1	sess	True	arslan_100	cerebellum_suit	True	4	crossed	False	4	Wed Nov 24 01:14:22 2021
669	s06	0.21130024340516296	0.8025776684826663	100	0.3457040033384094	0.4295890223883409	ridge_arslan_100_alpha_4	L2regression	glm7	sc1	sess	True	arslan_100	cerebellum_suit	True	4	crossed	False	4	Wed Nov 24 01:14:24 2021
670	s22	0.2560009390829075	0.8163461203643613	100	0.4247892921407777	0.4852883925526975	ridge_arslan_100_alpha_4	L2regression	glm7	sc1	sess	True	arslan_100	cerebellum_suit	True	4	crossed	False	4	Wed Nov 24 01:14:25 2021
671	s21	0.2664179801001012	0.7604635557448512	100	0.4516877037397798	0.03049239857936738	ridge_arslan_100_alpha_4	L2regression	glm7	sc1	sess	True	arslan_100	cerebellum_suit	True	4	crossed	False	4	Wed Nov 24 01:14:26 2021
672	s08	0.3714027071276755	0.5465766719330658	100	0.43733122061962826	0.21623205277339885	ridge_arslan_100_alpha_6	L2regression	glm7	sc1	sess	True	arslan_100	cerebellum_suit	True	4	crossed	False	6	Wed Nov 24 01:14:27 2021
673	s26	0.2994359703865129	0.6173124218231545	100	0.3681789891664162	0.2680076028294823	ridge_arslan_100_alpha_6	L2regression	glm7	sc1	sess	True	arslan_100	cerebellum_suit	True	4	crossed	False	6	Wed Nov 24 01:14:28 2021
674	s04	0.2855429417898457	0.6020088282890006	100	0.36355632070060107	0.235572126600174	ridge_arslan_100_alpha_6	L2regression	glm7	sc1	sess	True	arslan_100	cerebellum_suit	True	4	crossed	False	6	Wed Nov 24 01:14:29 2021
675	s14	0.29498263739672603	0.5980202574001746	100	0.3568170781635129	0.3128929680667298	ridge_arslan_100_alpha_6	L2regression	glm7	sc1	sess	True	arslan_100	cerebellum_suit	True	4	crossed	False	6	Wed Nov 24 01:14:31 2021
676	s06	0.2566444327928294	0.7010674651108625	100	0.3318408028026756	0.4326115715555769	ridge_arslan_100_alpha_6	L2regression	glm7	sc1	sess	True	arslan_100	cerebellum_suit	True	4	crossed	False	6	Wed Nov 24 01:14:32 2021
677	s22	0.3127023653526775	0.7212215607741312	100	0.4105526926115517	0.4904695002223216	ridge_arslan_100_alpha_6	L2regression	glm7	sc1	sess	True	arslan_100	cerebellum_suit	True	4	crossed	False	6	Wed Nov 24 01:14:33 2021
678	s21	0.32938478507738483	0.5943307856172154	100	0.4170756352551964	0.035833713268496256	ridge_arslan_100_alpha_6	L2regression	glm7	sc1	sess	True	arslan_100	cerebellum_suit	True	4	crossed	False	6	Wed Nov 24 01:14:34 2021
679	s08	0.4050951321318545	0.3941994441328936	100	0.4396143014430533	0.1546161525344916	ridge_arslan_100_alpha_8	L2regression	glm7	sc1	sess	True	arslan_100	cerebellum_suit	True	4	crossed	False	8	Wed Nov 24 01:14:35 2021
680	s26	0.3367568288235	0.4862223958938364	100	0.3737583026223035	0.2297543110075453	ridge_arslan_100_alpha_8	L2regression	glm7	sc1	sess	True	arslan_100	cerebellum_suit	True	4	crossed	False	8	Wed Nov 24 01:14:36 2021
681	s04	0.3170171471644941	0.44307869586566817	100	0.3657152322538177	0.20368169125616006	ridge_arslan_100_alpha_8	L2regression	glm7	sc1	sess	True	arslan_100	cerebellum_suit	True	4	crossed	False	8	Wed Nov 24 01:14:37 2021
682	s14	0.32728958532745633	0.4533667740505898	100	0.36182846122097817	0.28884026849897826	ridge_arslan_100_alpha_8	L2regression	glm7	sc1	sess	True	arslan_100	cerebellum_suit	True	4	crossed	False	8	Wed Nov 24 01:14:39 2021
683	s06	0.2992680439217679	0.6245279959980191	100	0.3476477045204387	0.4070856234042762	ridge_arslan_100_alpha_8	L2regression	glm7	sc1	sess	True	arslan_100	cerebellum_suit	True	4	crossed	False	8	Wed Nov 24 01:14:40 2021
684	s22	0.36553211008209946	0.6488332741659446	100	0.43827082116551896	0.4636276657030268	ridge_arslan_100_alpha_8	L2regression	glm7	sc1	sess	True	arslan_100	cerebellum_suit	True	4	crossed	False	8	Wed Nov 24 01:14:41 2021
685	s21	0.3655214706253012	0.4310964269379256	100	0.4081885419889004	0.0028566709266315393	ridge_arslan_100_alpha_8	L2regression	glm7	sc1	sess	True	arslan_100	cerebellum_suit	True	4	crossed	False	8	Wed Nov 24 01:14:42 2021
686	s08	0.4181107660569973	0.294879267754211	100	0.44101591736318396	0.11599898098063392	ridge_arslan_100_alpha_10	L2regression	glm7	sc1	sess	True	arslan_100	cerebellum_suit	True	4	crossed	False	10	Wed Nov 24 01:14:43 2021
687	s26	0.3525008369446415	0.3965339524240527	100	0.3796881167394913	0.202613763497952	ridge_arslan_100_alpha_10	L2regression	glm7	sc1	sess	True	arslan_100	cerebellum_suit	True	4	crossed	False	10	Wed Nov 24 01:14:44 2021
688	s04	0.3307086341987658	0.3551496873682516	100	0.3706921038346213	0.17574692513747953	ridge_arslan_100_alpha_10	L2regression	glm7	sc1	sess	True	arslan_100	cerebellum_suit	True	4	crossed	False	10	Wed Nov 24 01:14:45 2021
689	s14	0.34453670371465045	0.37844131015688254	100	0.3709768251227409	0.26620942882934284	ridge_arslan_100_alpha_10	L2regression	glm7	sc1	sess	True	arslan_100	cerebellum_suit	True	4	crossed	False	10	Wed Nov 24 01:14:47 2021
690	s06	0.3228546997571977	0.5883972687102352	100	0.3630539580955402	0.387055211886873	ridge_arslan_100_alpha_10	L2regression	glm7	sc1	sess	True	arslan_100	cerebellum_suit	True	4	crossed	False	10	Wed Nov 24 01:14:48 2021
691	s22	0.3938721748090736	0.6068228782231423	100	0.4614244201404638	0.4374017322545011	ridge_arslan_100_alpha_10	L2regression	glm7	sc1	sess	True	arslan_100	cerebellum_suit	True	4	crossed	False	10	Wed Nov 24 01:14:49 2021
692	s21	0.378027793054868	0.33724278349775594	100	0.4063594948546537	-0.015075785151154684	ridge_arslan_100_alpha_10	L2regression	glm7	sc1	sess	True	arslan_100	cerebellum_suit	True	4	crossed	False	10	Wed Nov 24 01:14:51 2021
693	s08	0.010903210758130577	0.9997194041232668	300	0.6107623774912392	0.16343661785415495	ridge_Schaefer_7_300_alpha_-2	L2regression	glm7	sc1	sess	True	Schaefer_7_300	cerebellum_suit	True	4	crossed	False	-2	Wed Nov 24 01:12:33 2021
694	s26	0.008273329031399214	0.9997816116500268	300	0.482791288756301	0.2616192741163521	ridge_Schaefer_7_300_alpha_-2	L2regression	glm7	sc1	sess	True	Schaefer_7_300	cerebellum_suit	True	4	crossed	False	-2	Wed Nov 24 01:12:34 2021
695	s04	0.006549303980213868	0.9998466287603408	300	0.47262134922036	0.2001096564797991	ridge_Schaefer_7_300_alpha_-2	L2regression	glm7	sc1	sess	True	Schaefer_7_300	cerebellum_suit	True	4	crossed	False	-2	Wed Nov 24 01:12:36 2021
696	s14	0.011076242812797123	0.9995806936947887	300	0.5073053349436936	0.19676560441478752	ridge_Schaefer_7_300_alpha_-2	L2regression	glm7	sc1	sess	True	Schaefer_7_300	cerebellum_suit	True	4	crossed	False	-2	Wed Nov 24 01:12:37 2021
697	s06	0.007135306994974442	0.9998135902591808	300	0.4327669346552104	0.3601536396766495	ridge_Schaefer_7_300_alpha_-2	L2regression	glm7	sc1	sess	True	Schaefer_7_300	cerebellum_suit	True	4	crossed	False	-2	Wed Nov 24 01:12:39 2021
698	s22	0.006084305574697164	0.99991534728923	300	0.5244600569824018	0.4051515406058245	ridge_Schaefer_7_300_alpha_-2	L2regression	glm7	sc1	sess	True	Schaefer_7_300	cerebellum_suit	True	4	crossed	False	-2	Wed Nov 24 01:12:40 2021
699	s21	0.006369820958808733	0.9998825053140558	300	0.5728421047256431	0.042862427702022254	ridge_Schaefer_7_300_alpha_-2	L2regression	glm7	sc1	sess	True	Schaefer_7_300	cerebellum_suit	True	4	crossed	False	-2	Wed Nov 24 01:12:42 2021
700	s08	0.05167383761918712	0.9936246036293233	300	0.5800304890808713	0.17179197826978193	ridge_Schaefer_7_300_alpha_0	L2regression	glm7	sc1	sess	True	Schaefer_7_300	cerebellum_suit	True	4	crossed	False	0	Wed Nov 24 01:12:43 2021
701	s26	0.04093292544392236	0.9945603336921156	300	0.4614422320088233	0.2678932201368819	ridge_Schaefer_7_300_alpha_0	L2regression	glm7	sc1	sess	True	Schaefer_7_300	cerebellum_suit	True	4	crossed	False	0	Wed Nov 24 01:12:45 2021
702	s04	0.03227359634963347	0.9962599946397293	300	0.4522989754367687	0.21069930865731007	ridge_Schaefer_7_300_alpha_0	L2regression	glm7	sc1	sess	True	Schaefer_7_300	cerebellum_suit	True	4	crossed	False	0	Wed Nov 24 01:12:46 2021
703	s14	0.04907585659030361	0.9915903722356844	300	0.4751839843080943	0.21164778397643288	ridge_Schaefer_7_300_alpha_0	L2regression	glm7	sc1	sess	True	Schaefer_7_300	cerebellum_suit	True	4	crossed	False	0	Wed Nov 24 01:12:48 2021
704	s06	0.034663803092871766	0.9955365180575072	300	0.41361776518535537	0.3786288305440909	ridge_Schaefer_7_300_alpha_0	L2regression	glm7	sc1	sess	True	Schaefer_7_300	cerebellum_suit	True	4	crossed	False	0	Wed Nov 24 01:12:49 2021
705	s22	0.03289908048210114	0.9974855106899859	300	0.5068235132304656	0.4198043458098109	ridge_Schaefer_7_300_alpha_0	L2regression	glm7	sc1	sess	True	Schaefer_7_300	cerebellum_suit	True	4	crossed	False	0	Wed Nov 24 01:12:50 2021
706	s21	0.033372549799041015	0.9967563107461934	300	0.5535410339354586	0.045437957450893816	ridge_Schaefer_7_300_alpha_0	L2regression	glm7	sc1	sess	True	Schaefer_7_300	cerebellum_suit	True	4	crossed	False	0	Wed Nov 24 01:12:52 2021
707	s08	0.13261828046972798	0.9578223438767888	300	0.5283514880797547	0.18543499983017706	ridge_Schaefer_7_300_alpha_2	L2regression	glm7	sc1	sess	True	Schaefer_7_300	cerebellum_suit	True	4	crossed	False	2	Wed Nov 24 01:12:53 2021
708	s26	0.1099370560109072	0.9591132442839556	300	0.4236949348968047	0.28182406921409264	ridge_Schaefer_7_300_alpha_2	L2regression	glm7	sc1	sess	True	Schaefer_7_300	cerebellum_suit	True	4	crossed	False	2	Wed Nov 24 01:12:55 2021
709	s04	0.08670829985680982	0.9729395503454534	300	0.4184664531770803	0.2317198679584579	ridge_Schaefer_7_300_alpha_2	L2regression	glm7	sc1	sess	True	Schaefer_7_300	cerebellum_suit	True	4	crossed	False	2	Wed Nov 24 01:12:56 2021
710	s14	0.11654695542953634	0.9513242981006568	300	0.4306084497026934	0.2323825129212592	ridge_Schaefer_7_300_alpha_2	L2regression	glm7	sc1	sess	True	Schaefer_7_300	cerebellum_suit	True	4	crossed	False	2	Wed Nov 24 01:12:58 2021
711	s06	0.08967585190132442	0.9693597351597912	300	0.3799721624302455	0.413832665582314	ridge_Schaefer_7_300_alpha_2	L2regression	glm7	sc1	sess	True	Schaefer_7_300	cerebellum_suit	True	4	crossed	False	2	Wed Nov 24 01:13:00 2021
712	s22	0.09802256193174	0.976941521799368	300	0.4708130900344466	0.4510075630337282	ridge_Schaefer_7_300_alpha_2	L2regression	glm7	sc1	sess	True	Schaefer_7_300	cerebellum_suit	True	4	crossed	False	2	Wed Nov 24 01:13:01 2021
713	s21	0.09583159621029264	0.9733743546328972	300	0.5117885598596494	0.05060770902927793	ridge_Schaefer_7_300_alpha_2	L2regression	glm7	sc1	sess	True	Schaefer_7_300	cerebellum_suit	True	4	crossed	False	2	Wed Nov 24 01:13:03 2021
714	s08	0.2348265330183784	0.8617689037769101	300	0.4798815394729669	0.20182659882780013	ridge_Schaefer_7_300_alpha_4	L2regression	glm7	sc1	sess	True	Schaefer_7_300	cerebellum_suit	True	4	crossed	False	4	Wed Nov 24 01:13:04 2021
715	s26	0.1907151315710437	0.8675226819803034	300	0.3920559876012583	0.2924600066642798	ridge_Schaefer_7_300_alpha_4	L2regression	glm7	sc1	sess	True	Schaefer_7_300	cerebellum_suit	True	4	crossed	False	4	Wed Nov 24 01:13:06 2021
716	s04	0.16017189855706587	0.9066781803129924	300	0.3913760496780351	0.24886560882856146	ridge_Schaefer_7_300_alpha_4	L2regression	glm7	sc1	sess	True	Schaefer_7_300	cerebellum_suit	True	4	crossed	False	4	Wed Nov 24 01:13:07 2021
717	s14	0.1928200885229205	0.8592646947153114	300	0.3960802812987432	0.253882412678042	ridge_Schaefer_7_300_alpha_4	L2regression	glm7	sc1	sess	True	Schaefer_7_300	cerebellum_suit	True	4	crossed	False	4	Wed Nov 24 01:13:09 2021
718	s06	0.15501808324471675	0.9046767513876468	300	0.3543032377691111	0.4351337271639405	ridge_Schaefer_7_300_alpha_4	L2regression	glm7	sc1	sess	True	Schaefer_7_300	cerebellum_suit	True	4	crossed	False	4	Wed Nov 24 01:13:10 2021
719	s22	0.1822670368484289	0.9162993540767468	300	0.4396197932169923	0.4761277622498549	ridge_Schaefer_7_300_alpha_4	L2regression	glm7	sc1	sess	True	Schaefer_7_300	cerebellum_suit	True	4	crossed	False	4	Wed Nov 24 01:13:11 2021
720	s21	0.1825666350892797	0.9039575954207169	300	0.4705559421396765	0.05556924133009968	ridge_Schaefer_7_300_alpha_4	L2regression	glm7	sc1	sess	True	Schaefer_7_300	cerebellum_suit	True	4	crossed	False	4	Wed Nov 24 01:13:13 2021
721	s08	0.3264476341876989	0.6959283192910011	300	0.4457157636791324	0.2141062335007264	ridge_Schaefer_7_300_alpha_6	L2regression	glm7	sc1	sess	True	Schaefer_7_300	cerebellum_suit	True	4	crossed	False	6	Wed Nov 24 01:13:14 2021
722	s26	0.2611269240267789	0.7299475032196556	300	0.3710636044115182	0.2894463165749594	ridge_Schaefer_7_300_alpha_6	L2regression	glm7	sc1	sess	True	Schaefer_7_300	cerebellum_suit	True	4	crossed	False	6	Wed Nov 24 01:13:16 2021
723	s04	0.2409840376314631	0.7615606414164311	300	0.3675849512952632	0.2563131706046808	ridge_Schaefer_7_300_alpha_6	L2regression	glm7	sc1	sess	True	Schaefer_7_300	cerebellum_suit	True	4	crossed	False	6	Wed Nov 24 01:13:17 2021
724	s14	0.2606862420737629	0.7140813850068587	300	0.3652794119049114	0.29344979204235944	ridge_Schaefer_7_300_alpha_6	L2regression	glm7	sc1	sess	True	Schaefer_7_300	cerebellum_suit	True	4	crossed	False	6	Wed Nov 24 01:13:18 2021
725	s06	0.22019499758882266	0.7924225852094545	300	0.3359679948566049	0.4397222082790853	ridge_Schaefer_7_300_alpha_6	L2regression	glm7	sc1	sess	True	Schaefer_7_300	cerebellum_suit	True	4	crossed	False	6	Wed Nov 24 01:13:20 2021
726	s22	0.2646072039084168	0.8112506822748224	300	0.4130298692949538	0.4963471983292996	ridge_Schaefer_7_300_alpha_6	L2regression	glm7	sc1	sess	True	Schaefer_7_300	cerebellum_suit	True	4	crossed	False	6	Wed Nov 24 01:13:21 2021
727	s21	0.2764530314448471	0.7613777323049815	300	0.4290023340070777	0.06446771876445542	ridge_Schaefer_7_300_alpha_6	L2regression	glm7	sc1	sess	True	Schaefer_7_300	cerebellum_suit	True	4	crossed	False	6	Wed Nov 24 01:13:23 2021
728	s08	0.3848916825221608	0.5239709606792593	300	0.437879363097596	0.1910879320554811	ridge_Schaefer_7_300_alpha_8	L2regression	glm7	sc1	sess	True	Schaefer_7_300	cerebellum_suit	True	4	crossed	False	8	Wed Nov 24 01:13:24 2021
729	s26	0.31453308854010525	0.5910322212536957	300	0.3680373821866821	0.26790765037441444	ridge_Schaefer_7_300_alpha_8	L2regression	glm7	sc1	sess	True	Schaefer_7_300	cerebellum_suit	True	4	crossed	False	8	Wed Nov 24 01:13:26 2021
730	s04	0.29695576892585823	0.5811155377893571	300	0.361740253381012	0.240777266333268	ridge_Schaefer_7_300_alpha_8	L2regression	glm7	sc1	sess	True	Schaefer_7_300	cerebellum_suit	True	4	crossed	False	8	Wed Nov 24 01:13:27 2021
731	s14	0.3082946275546612	0.5587058884549233	300	0.35758346912071604	0.3060920356750869	ridge_Schaefer_7_300_alpha_8	L2regression	glm7	sc1	sess	True	Schaefer_7_300	cerebellum_suit	True	4	crossed	False	8	Wed Nov 24 01:13:28 2021
732	s06	0.2731714409741213	0.6867006569768849	300	0.3353906589911987	0.4308034282830595	ridge_Schaefer_7_300_alpha_8	L2regression	glm7	sc1	sess	True	Schaefer_7_300	cerebellum_suit	True	4	crossed	False	8	Wed Nov 24 01:13:30 2021
733	s22	0.3322729151305288	0.7131657661518401	300	0.4181157423397852	0.4913043958360367	ridge_Schaefer_7_300_alpha_8	L2regression	glm7	sc1	sess	True	Schaefer_7_300	cerebellum_suit	True	4	crossed	False	8	Wed Nov 24 01:13:31 2021
734	s21	0.34324148788482683	0.5868265038442276	300	0.40938342392630667	0.04506286079134299	ridge_Schaefer_7_300_alpha_8	L2regression	glm7	sc1	sess	True	Schaefer_7_300	cerebellum_suit	True	4	crossed	False	8	Wed Nov 24 01:13:33 2021
735	s08	0.4122517263918048	0.3609794425179768	300	0.4401430382588779	0.14152855518178822	ridge_Schaefer_7_300_alpha_10	L2regression	glm7	sc1	sess	True	Schaefer_7_300	cerebellum_suit	True	4	crossed	False	10	Wed Nov 24 01:13:34 2021
736	s26	0.34550972899567833	0.4672008845397178	300	0.3767064739984008	0.2334807012290806	ridge_Schaefer_7_300_alpha_10	L2regression	glm7	sc1	sess	True	Schaefer_7_300	cerebellum_suit	True	4	crossed	False	10	Wed Nov 24 01:13:35 2021
737	s04	0.3242884706944325	0.4259058971321259	300	0.3681366426312019	0.1997785065763755	ridge_Schaefer_7_300_alpha_10	L2regression	glm7	sc1	sess	True	Schaefer_7_300	cerebellum_suit	True	4	crossed	False	10	Wed Nov 24 01:13:37 2021
738	s14	0.3365094794354096	0.4264037803004148	300	0.3666895188045857	0.27714516097206665	ridge_Schaefer_7_300_alpha_10	L2regression	glm7	sc1	sess	True	Schaefer_7_300	cerebellum_suit	True	4	crossed	False	10	Wed Nov 24 01:13:38 2021
739	s06	0.3133538377216861	0.6290550765167591	300	0.35708608547810505	0.4092612672160479	ridge_Schaefer_7_300_alpha_10	L2regression	glm7	sc1	sess	True	Schaefer_7_300	cerebellum_suit	True	4	crossed	False	10	Wed Nov 24 01:13:40 2021
740	s22	0.38222672088561815	0.6551816859284356	300	0.4525953201358188	0.4647891513800735	ridge_Schaefer_7_300_alpha_10	L2regression	glm7	sc1	sess	True	Schaefer_7_300	cerebellum_suit	True	4	crossed	False	10	Wed Nov 24 01:13:41 2021
741	s21	0.3724673850254995	0.4275656309947515	300	0.4064535834391103	0.011799221299360363	ridge_Schaefer_7_300_alpha_10	L2regression	glm7	sc1	sess	True	Schaefer_7_300	cerebellum_suit	True	4	crossed	False	10	Wed Nov 24 01:13:43 2021
742	s08	0.026720029635506657	0.9982219519777512	200	0.6602723589143571	0.12219486754748565	ridge_Schaefer_7_200_alpha_-2	L2regression	glm7	sc1	sess	True	Schaefer_7_200	cerebellum_suit	True	4	crossed	False	-2	Wed Nov 24 01:11:17 2021
743	s26	0.019566324164392704	0.9987153895447176	200	0.5027693993034217	0.2627257076320376	ridge_Schaefer_7_200_alpha_-2	L2regression	glm7	sc1	sess	True	Schaefer_7_200	cerebellum_suit	True	4	crossed	False	-2	Wed Nov 24 01:11:18 2021
744	s04	0.01504067212562996	0.9991635782289392	200	0.4876979167056624	0.2013811722595647	ridge_Schaefer_7_200_alpha_-2	L2regression	glm7	sc1	sess	True	Schaefer_7_200	cerebellum_suit	True	4	crossed	False	-2	Wed Nov 24 01:11:20 2021
745	s14	0.02425135260786233	0.997904532013146	200	0.5159783111616271	0.19307828927855591	ridge_Schaefer_7_200_alpha_-2	L2regression	glm7	sc1	sess	True	Schaefer_7_200	cerebellum_suit	True	4	crossed	False	-2	Wed Nov 24 01:11:21 2021
746	s06	0.016825424314399127	0.9989334754760708	200	0.4482960017023936	0.3461088397160216	ridge_Schaefer_7_200_alpha_-2	L2regression	glm7	sc1	sess	True	Schaefer_7_200	cerebellum_suit	True	4	crossed	False	-2	Wed Nov 24 01:11:23 2021
747	s22	0.016504544047173317	0.9993436175521636	200	0.5522311567540314	0.389551015906309	ridge_Schaefer_7_200_alpha_-2	L2regression	glm7	sc1	sess	True	Schaefer_7_200	cerebellum_suit	True	4	crossed	False	-2	Wed Nov 24 01:11:24 2021
748	s21	0.015367679378947022	0.9992882240744402	200	0.6087082264479383	0.0399407313371372	ridge_Schaefer_7_200_alpha_-2	L2regression	glm7	sc1	sess	True	Schaefer_7_200	cerebellum_suit	True	4	crossed	False	-2	Wed Nov 24 01:11:26 2021
749	s08	0.08696457335437847	0.9812632345821678	200	0.6083170212699829	0.134104399411131	ridge_Schaefer_7_200_alpha_0	L2regression	glm7	sc1	sess	True	Schaefer_7_200	cerebellum_suit	True	4	crossed	False	0	Wed Nov 24 01:11:27 2021
750	s26	0.06843593627424123	0.9841137223812444	200	0.4639873102200212	0.2751314306218178	ridge_Schaefer_7_200_alpha_0	L2regression	glm7	sc1	sess	True	Schaefer_7_200	cerebellum_suit	True	4	crossed	False	0	Wed Nov 24 01:11:28 2021
751	s04	0.05338560034098698	0.9894619607228364	200	0.4513570229881988	0.2209306315238215	ridge_Schaefer_7_200_alpha_0	L2regression	glm7	sc1	sess	True	Schaefer_7_200	cerebellum_suit	True	4	crossed	False	0	Wed Nov 24 01:11:30 2021
752	s14	0.07576273151706539	0.9791756956654046	200	0.4669740369200681	0.21367522880832165	ridge_Schaefer_7_200_alpha_0	L2regression	glm7	sc1	sess	True	Schaefer_7_200	cerebellum_suit	True	4	crossed	False	0	Wed Nov 24 01:11:31 2021
753	s06	0.057256533709212125	0.9874862713304304	200	0.4144861124792745	0.3750375188585132	ridge_Schaefer_7_200_alpha_0	L2regression	glm7	sc1	sess	True	Schaefer_7_200	cerebellum_suit	True	4	crossed	False	0	Wed Nov 24 01:11:33 2021
754	s22	0.05999200637708722	0.9912513241347476	200	0.5110746804619735	0.4194328127065881	ridge_Schaefer_7_200_alpha_0	L2regression	glm7	sc1	sess	True	Schaefer_7_200	cerebellum_suit	True	4	crossed	False	0	Wed Nov 24 01:11:34 2021
755	s21	0.05743639317825115	0.9900873069682496	200	0.5660318490012741	0.041613690534501736	ridge_Schaefer_7_200_alpha_0	L2regression	glm7	sc1	sess	True	Schaefer_7_200	cerebellum_suit	True	4	crossed	False	0	Wed Nov 24 01:11:35 2021
756	s08	0.1734557372212968	0.9249153548537414	200	0.5376147565312538	0.15292329085227335	ridge_Schaefer_7_200_alpha_2	L2regression	glm7	sc1	sess	True	Schaefer_7_200	cerebellum_suit	True	4	crossed	False	2	Wed Nov 24 01:11:37 2021
757	s26	0.14083488264829275	0.9299886684932156	200	0.4187423297534179	0.2874696238522691	ridge_Schaefer_7_200_alpha_2	L2regression	glm7	sc1	sess	True	Schaefer_7_200	cerebellum_suit	True	4	crossed	False	2	Wed Nov 24 01:11:38 2021
758	s04	0.11179642506278334	0.9536986475427603	200	0.41399248968123936	0.2432263362556045	ridge_Schaefer_7_200_alpha_2	L2regression	glm7	sc1	sess	True	Schaefer_7_200	cerebellum_suit	True	4	crossed	False	2	Wed Nov 24 01:11:39 2021
759	s14	0.14289544257223166	0.9246260575515624	200	0.42439815783500495	0.2339638892584905	ridge_Schaefer_7_200_alpha_2	L2regression	glm7	sc1	sess	True	Schaefer_7_200	cerebellum_suit	True	4	crossed	False	2	Wed Nov 24 01:11:41 2021
760	s06	0.11413531930644487	0.9490725815829882	200	0.3796713680537788	0.4068228271351706	ridge_Schaefer_7_200_alpha_2	L2regression	glm7	sc1	sess	True	Schaefer_7_200	cerebellum_suit	True	4	crossed	False	2	Wed Nov 24 01:11:42 2021
761	s22	0.12743318331225068	0.959748057598512	200	0.4657496744970428	0.4550878410881124	ridge_Schaefer_7_200_alpha_2	L2regression	glm7	sc1	sess	True	Schaefer_7_200	cerebellum_suit	True	4	crossed	False	2	Wed Nov 24 01:11:43 2021
762	s21	0.1253140017424886	0.9535815159856436	200	0.5125581729977619	0.04033886227075748	ridge_Schaefer_7_200_alpha_2	L2regression	glm7	sc1	sess	True	Schaefer_7_200	cerebellum_suit	True	4	crossed	False	2	Wed Nov 24 01:11:45 2021
763	s08	0.2691724241091108	0.8053121047959164	200	0.4778118145732258	0.18244625642960588	ridge_Schaefer_7_200_alpha_4	L2regression	glm7	sc1	sess	True	Schaefer_7_200	cerebellum_suit	True	4	crossed	False	4	Wed Nov 24 01:11:46 2021
764	s26	0.21541939321492096	0.8225731289764112	200	0.3874922545509504	0.29254822423518084	ridge_Schaefer_7_200_alpha_4	L2regression	glm7	sc1	sess	True	Schaefer_7_200	cerebellum_suit	True	4	crossed	False	4	Wed Nov 24 01:11:47 2021
765	s04	0.18598024954711007	0.8672093087636171	200	0.3856517143750302	0.25367816707713153	ridge_Schaefer_7_200_alpha_4	L2regression	glm7	sc1	sess	True	Schaefer_7_200	cerebellum_suit	True	4	crossed	False	4	Wed Nov 24 01:11:49 2021
766	s14	0.21517410232842527	0.8170917631064325	200	0.3889607055915524	0.2600945464374336	ridge_Schaefer_7_200_alpha_4	L2regression	glm7	sc1	sess	True	Schaefer_7_200	cerebellum_suit	True	4	crossed	False	4	Wed Nov 24 01:11:50 2021
767	s06	0.17734920455683054	0.87015604158595	200	0.35373729427838274	0.4264013241139896	ridge_Schaefer_7_200_alpha_4	L2regression	glm7	sc1	sess	True	Schaefer_7_200	cerebellum_suit	True	4	crossed	False	4	Wed Nov 24 01:11:51 2021
768	s22	0.207720595130334	0.8874259529721277	200	0.4347502934242212	0.4786237291044714	ridge_Schaefer_7_200_alpha_4	L2regression	glm7	sc1	sess	True	Schaefer_7_200	cerebellum_suit	True	4	crossed	False	4	Wed Nov 24 01:11:53 2021
769	s21	0.21355919243837035	0.8621892881831071	200	0.4659790684042725	0.04466889328902441	ridge_Schaefer_7_200_alpha_4	L2regression	glm7	sc1	sess	True	Schaefer_7_200	cerebellum_suit	True	4	crossed	False	4	Wed Nov 24 01:11:54 2021
770	s08	0.3456956802566861	0.6405832817882539	200	0.4436366286388018	0.1983432778225173	ridge_Schaefer_7_200_alpha_6	L2regression	glm7	sc1	sess	True	Schaefer_7_200	cerebellum_suit	True	4	crossed	False	6	Wed Nov 24 01:11:55 2021
771	s26	0.2763287540789697	0.6883368455800051	200	0.3688053237692319	0.2860986632718454	ridge_Schaefer_7_200_alpha_6	L2regression	glm7	sc1	sess	True	Schaefer_7_200	cerebellum_suit	True	4	crossed	False	6	Wed Nov 24 01:11:57 2021
772	s04	0.25849191862140314	0.710981355616246	200	0.3642350615782606	0.25587329048308705	ridge_Schaefer_7_200_alpha_6	L2regression	glm7	sc1	sess	True	Schaefer_7_200	cerebellum_suit	True	4	crossed	False	6	Wed Nov 24 01:11:58 2021
773	s14	0.27483100787284875	0.6704885386338683	200	0.361356948584198	0.2998703490233852	ridge_Schaefer_7_200_alpha_6	L2regression	glm7	sc1	sess	True	Schaefer_7_200	cerebellum_suit	True	4	crossed	False	6	Wed Nov 24 01:11:59 2021
774	s06	0.2353251847241666	0.7555147584093305	200	0.33400394308972114	0.4362304153558232	ridge_Schaefer_7_200_alpha_6	L2regression	glm7	sc1	sess	True	Schaefer_7_200	cerebellum_suit	True	4	crossed	False	6	Wed Nov 24 01:12:01 2021
775	s22	0.2821427648645992	0.7813151129537281	200	0.4105804871261088	0.4964191875419202	ridge_Schaefer_7_200_alpha_6	L2regression	glm7	sc1	sess	True	Schaefer_7_200	cerebellum_suit	True	4	crossed	False	6	Wed Nov 24 01:12:02 2021
776	s21	0.2981002446133105	0.7050841689240881	200	0.4234428844675645	0.058535263005472286	ridge_Schaefer_7_200_alpha_6	L2regression	glm7	sc1	sess	True	Schaefer_7_200	cerebellum_suit	True	4	crossed	False	6	Wed Nov 24 01:12:03 2021
777	s08	0.3941240832962887	0.474433682130396	200	0.4391437353145573	0.16756160328571962	ridge_Schaefer_7_200_alpha_8	L2regression	glm7	sc1	sess	True	Schaefer_7_200	cerebellum_suit	True	4	crossed	False	8	Wed Nov 24 01:12:05 2021
778	s26	0.3238169091043286	0.5553833403352675	200	0.3698941596623053	0.2578616646142429	ridge_Schaefer_7_200_alpha_8	L2regression	glm7	sc1	sess	True	Schaefer_7_200	cerebellum_suit	True	4	crossed	False	8	Wed Nov 24 01:12:06 2021
779	s04	0.3058588253505889	0.5306265608907721	200	0.3631086622473855	0.2287063469605985	ridge_Schaefer_7_200_alpha_8	L2regression	glm7	sc1	sess	True	Schaefer_7_200	cerebellum_suit	True	4	crossed	False	8	Wed Nov 24 01:12:07 2021
780	s14	0.3164298367682903	0.5174313198222109	200	0.35899235816968056	0.29928198769017544	ridge_Schaefer_7_200_alpha_8	L2regression	glm7	sc1	sess	True	Schaefer_7_200	cerebellum_suit	True	4	crossed	False	8	Wed Nov 24 01:12:08 2021
781	s06	0.2837825952081275	0.662060024327266	200	0.3396067483626701	0.4238361149478536	ridge_Schaefer_7_200_alpha_8	L2regression	glm7	sc1	sess	True	Schaefer_7_200	cerebellum_suit	True	4	crossed	False	8	Wed Nov 24 01:12:10 2021
782	s22	0.3455602972798968	0.6933807638168447	200	0.425635890081474	0.4837016273417459	ridge_Schaefer_7_200_alpha_8	L2regression	glm7	sc1	sess	True	Schaefer_7_200	cerebellum_suit	True	4	crossed	False	8	Wed Nov 24 01:12:11 2021
783	s21	0.3532300286098615	0.5324653180961545	200	0.4084491259825515	0.0347211776959248	ridge_Schaefer_7_200_alpha_8	L2regression	glm7	sc1	sess	True	Schaefer_7_200	cerebellum_suit	True	4	crossed	False	8	Wed Nov 24 01:12:12 2021
784	s08	0.4150763790316544	0.33196778199598603	200	0.440650157224066	0.12374627583260972	ridge_Schaefer_7_200_alpha_10	L2regression	glm7	sc1	sess	True	Schaefer_7_200	cerebellum_suit	True	4	crossed	False	10	Wed Nov 24 01:12:13 2021
785	s26	0.3487499358217928	0.4408020868675535	200	0.3780446466248623	0.2233770956186715	ridge_Schaefer_7_200_alpha_10	L2regression	glm7	sc1	sess	True	Schaefer_7_200	cerebellum_suit	True	4	crossed	False	10	Wed Nov 24 01:12:14 2021
786	s04	0.3272652798036888	0.3924150065096276	200	0.3692755351421017	0.18864895744743385	ridge_Schaefer_7_200_alpha_10	L2regression	glm7	sc1	sess	True	Schaefer_7_200	cerebellum_suit	True	4	crossed	False	10	Wed Nov 24 01:12:16 2021
787	s14	0.34006818286067664	0.4044814904963275	200	0.3685317565015035	0.2709584307252497	ridge_Schaefer_7_200_alpha_10	L2regression	glm7	sc1	sess	True	Schaefer_7_200	cerebellum_suit	True	4	crossed	False	10	Wed Nov 24 01:12:17 2021
788	s06	0.3177741500250835	0.6106672972307118	200	0.35984271804404505	0.4005397949281714	ridge_Schaefer_7_200_alpha_10	L2regression	glm7	sc1	sess	True	Schaefer_7_200	cerebellum_suit	True	4	crossed	False	10	Wed Nov 24 01:12:18 2021
789	s22	0.3877559071148299	0.6410663568131336	200	0.4569476149632566	0.4548831393857621	ridge_Schaefer_7_200_alpha_10	L2regression	glm7	sc1	sess	True	Schaefer_7_200	cerebellum_suit	True	4	crossed	False	10	Wed Nov 24 01:12:19 2021
790	s21	0.3751335888100889	0.39501381115974615	200	0.4063288083998103	0.006749033511568926	ridge_Schaefer_7_200_alpha_10	L2regression	glm7	sc1	sess	True	Schaefer_7_200	cerebellum_suit	True	4	crossed	False	10	Wed Nov 24 01:12:21 2021
791	s08	0.10416262486468868	0.9705070560055048	100	0.6780604782859379	0.10825780592116993	ridge_Schaefer_7_100_alpha_-2	L2regression	glm7	sc1	sess	True	Schaefer_7_100	cerebellum_suit	True	4	crossed	False	-2	Wed Nov 24 01:09:57 2021
792	s26	0.07902441252274127	0.9770558021900992	100	0.5246830908404478	0.2364632275326008	ridge_Schaefer_7_100_alpha_-2	L2regression	glm7	sc1	sess	True	Schaefer_7_100	cerebellum_suit	True	4	crossed	False	-2	Wed Nov 24 01:09:59 2021
793	s04	0.06427677187219327	0.9836740379174462	100	0.5181047846644619	0.1824018999089153	ridge_Schaefer_7_100_alpha_-2	L2regression	glm7	sc1	sess	True	Schaefer_7_100	cerebellum_suit	True	4	crossed	False	-2	Wed Nov 24 01:10:00 2021
794	s14	0.08682932755972145	0.9708058875323669	100	0.5150247760123368	0.1908231879481478	ridge_Schaefer_7_100_alpha_-2	L2regression	glm7	sc1	sess	True	Schaefer_7_100	cerebellum_suit	True	4	crossed	False	-2	Wed Nov 24 01:10:02 2021
795	s06	0.06750238688358827	0.9815929763776196	100	0.4813245202313179	0.31065059010596674	ridge_Schaefer_7_100_alpha_-2	L2regression	glm7	sc1	sess	True	Schaefer_7_100	cerebellum_suit	True	4	crossed	False	-2	Wed Nov 24 01:10:04 2021
796	s22	0.07268331070555725	0.9864793358821548	100	0.5580227662103215	0.4005468451647095	ridge_Schaefer_7_100_alpha_-2	L2regression	glm7	sc1	sess	True	Schaefer_7_100	cerebellum_suit	True	4	crossed	False	-2	Wed Nov 24 01:10:05 2021
797	s21	0.06959770688779035	0.9838291284938421	100	0.6552460599512638	0.03965107576428023	ridge_Schaefer_7_100_alpha_-2	L2regression	glm7	sc1	sess	True	Schaefer_7_100	cerebellum_suit	True	4	crossed	False	-2	Wed Nov 24 01:10:07 2021
798	s08	0.16315879941012287	0.9285412782140464	100	0.5692111465364572	0.14951142422201907	ridge_Schaefer_7_100_alpha_0	L2regression	glm7	sc1	sess	True	Schaefer_7_100	cerebellum_suit	True	4	crossed	False	0	Wed Nov 24 01:10:09 2021
799	s26	0.13242899071101522	0.9352450087141948	100	0.4508373793963957	0.2607842610055026	ridge_Schaefer_7_100_alpha_0	L2regression	glm7	sc1	sess	True	Schaefer_7_100	cerebellum_suit	True	4	crossed	False	0	Wed Nov 24 01:10:10 2021
800	s04	0.10483197218684186	0.957057325717558	100	0.4453063143461643	0.21980388629174005	ridge_Schaefer_7_100_alpha_0	L2regression	glm7	sc1	sess	True	Schaefer_7_100	cerebellum_suit	True	4	crossed	False	0	Wed Nov 24 01:10:11 2021
801	s14	0.134880084662447	0.9296850993124542	100	0.4411409069866622	0.23084648939354965	ridge_Schaefer_7_100_alpha_0	L2regression	glm7	sc1	sess	True	Schaefer_7_100	cerebellum_suit	True	4	crossed	False	0	Wed Nov 24 01:10:13 2021
802	s06	0.1094850669725825	0.9515371619172648	100	0.4153238918509113	0.3591334811265835	ridge_Schaefer_7_100_alpha_0	L2regression	glm7	sc1	sess	True	Schaefer_7_100	cerebellum_suit	True	4	crossed	False	0	Wed Nov 24 01:10:14 2021
803	s22	0.12019288868654728	0.9630694170640419	100	0.4830846450986918	0.450840934763917	ridge_Schaefer_7_100_alpha_0	L2regression	glm7	sc1	sess	True	Schaefer_7_100	cerebellum_suit	True	4	crossed	False	0	Wed Nov 24 01:10:15 2021
804	s21	0.11591841481388195	0.9569054988288962	100	0.5566959404563083	0.05005562582357501	ridge_Schaefer_7_100_alpha_0	L2regression	glm7	sc1	sess	True	Schaefer_7_100	cerebellum_suit	True	4	crossed	False	0	Wed Nov 24 01:10:17 2021
805	s08	0.23752723463991576	0.8462583929121371	100	0.4971197700738274	0.1892149223800824	ridge_Schaefer_7_100_alpha_2	L2regression	glm7	sc1	sess	True	Schaefer_7_100	cerebellum_suit	True	4	crossed	False	2	Wed Nov 24 01:10:18 2021
806	s26	0.19355400239413548	0.8559714375184276	100	0.4067935141726601	0.27848506266743794	ridge_Schaefer_7_100_alpha_2	L2regression	glm7	sc1	sess	True	Schaefer_7_100	cerebellum_suit	True	4	crossed	False	2	Wed Nov 24 01:10:20 2021
807	s04	0.16132406372934724	0.8971945033742369	100	0.4101205007153576	0.22859847165486136	ridge_Schaefer_7_100_alpha_2	L2regression	glm7	sc1	sess	True	Schaefer_7_100	cerebellum_suit	True	4	crossed	False	2	Wed Nov 24 01:10:21 2021
808	s14	0.19185514342998564	0.8542711283354791	100	0.405535803300056	0.2500586661788292	ridge_Schaefer_7_100_alpha_2	L2regression	glm7	sc1	sess	True	Schaefer_7_100	cerebellum_suit	True	4	crossed	False	2	Wed Nov 24 01:10:22 2021
809	s06	0.15986672958249212	0.8935470417701487	100	0.3777189139098131	0.3916994129765097	ridge_Schaefer_7_100_alpha_2	L2regression	glm7	sc1	sess	True	Schaefer_7_100	cerebellum_suit	True	4	crossed	False	2	Wed Nov 24 01:10:24 2021
810	s22	0.1831095014605988	0.9123428083068464	100	0.4498674491034531	0.4720014967638737	ridge_Schaefer_7_100_alpha_2	L2regression	glm7	sc1	sess	True	Schaefer_7_100	cerebellum_suit	True	4	crossed	False	2	Wed Nov 24 01:10:25 2021
811	s21	0.1823185593875276	0.895493822115511	100	0.4961654486540445	0.04466152392680391	ridge_Schaefer_7_100_alpha_2	L2regression	glm7	sc1	sess	True	Schaefer_7_100	cerebellum_suit	True	4	crossed	False	2	Wed Nov 24 01:10:26 2021
812	s08	0.3136253860691613	0.709364241049887	100	0.456745941348153	0.21225359857908369	ridge_Schaefer_7_100_alpha_4	L2regression	glm7	sc1	sess	True	Schaefer_7_100	cerebellum_suit	True	4	crossed	False	4	Wed Nov 24 01:10:28 2021
813	s26	0.25172289346501553	0.7388791918491897	100	0.38083823105718617	0.28099887970787657	ridge_Schaefer_7_100_alpha_4	L2regression	glm7	sc1	sess	True	Schaefer_7_100	cerebellum_suit	True	4	crossed	False	4	Wed Nov 24 01:10:29 2021
814	s04	0.2294883133901212	0.774610727139672	100	0.3808849243890492	0.2343354392908115	ridge_Schaefer_7_100_alpha_4	L2regression	glm7	sc1	sess	True	Schaefer_7_100	cerebellum_suit	True	4	crossed	False	4	Wed Nov 24 01:10:31 2021
815	s14	0.2496858713256188	0.7336892918912933	100	0.3743950556265374	0.28041163996347096	ridge_Schaefer_7_100_alpha_4	L2regression	glm7	sc1	sess	True	Schaefer_7_100	cerebellum_suit	True	4	crossed	False	4	Wed Nov 24 01:10:32 2021
816	s06	0.21252510125815435	0.7994893435042064	100	0.34921809519943514	0.4183289563910724	ridge_Schaefer_7_100_alpha_4	L2regression	glm7	sc1	sess	True	Schaefer_7_100	cerebellum_suit	True	4	crossed	False	4	Wed Nov 24 01:10:33 2021
817	s22	0.25177746567573456	0.8240125811699482	100	0.42428166824238384	0.4877219664770192	ridge_Schaefer_7_100_alpha_4	L2regression	glm7	sc1	sess	True	Schaefer_7_100	cerebellum_suit	True	4	crossed	False	4	Wed Nov 24 01:10:35 2021
818	s21	0.2627205278712429	0.7703057319985128	100	0.4468606237622431	0.04830597967027155	ridge_Schaefer_7_100_alpha_4	L2regression	glm7	sc1	sess	True	Schaefer_7_100	cerebellum_suit	True	4	crossed	False	4	Wed Nov 24 01:10:36 2021
819	s08	0.3707272146293035	0.5557714588217564	100	0.43952351628015934	0.20049952406098864	ridge_Schaefer_7_100_alpha_6	L2regression	glm7	sc1	sess	True	Schaefer_7_100	cerebellum_suit	True	4	crossed	False	6	Wed Nov 24 01:10:38 2021
820	s26	0.2995289148841108	0.6153515882488448	100	0.3677177340888767	0.2723945744972442	ridge_Schaefer_7_100_alpha_6	L2regression	glm7	sc1	sess	True	Schaefer_7_100	cerebellum_suit	True	4	crossed	False	6	Wed Nov 24 01:10:39 2021
821	s04	0.2841302489213462	0.6107794619608193	100	0.3631233883828233	0.24097985401271466	ridge_Schaefer_7_100_alpha_6	L2regression	glm7	sc1	sess	True	Schaefer_7_100	cerebellum_suit	True	4	crossed	False	6	Wed Nov 24 01:10:40 2021
822	s14	0.29512251924949423	0.597899888589255	100	0.3574988235444825	0.3081295644280656	ridge_Schaefer_7_100_alpha_6	L2regression	glm7	sc1	sess	True	Schaefer_7_100	cerebellum_suit	True	4	crossed	False	6	Wed Nov 24 01:10:42 2021
823	s06	0.2571871886264453	0.7000073079487337	100	0.3330100334972079	0.4268982697309933	ridge_Schaefer_7_100_alpha_6	L2regression	glm7	sc1	sess	True	Schaefer_7_100	cerebellum_suit	True	4	crossed	False	6	Wed Nov 24 01:10:43 2021
824	s22	0.3102957310156213	0.7290979668314869	100	0.4092859862267039	0.4960630625716416	ridge_Schaefer_7_100_alpha_6	L2regression	glm7	sc1	sess	True	Schaefer_7_100	cerebellum_suit	True	4	crossed	False	6	Wed Nov 24 01:10:44 2021
825	s21	0.32812607179496994	0.6050379175670053	100	0.4159590859051492	0.04408141450621765	ridge_Schaefer_7_100_alpha_6	L2regression	glm7	sc1	sess	True	Schaefer_7_100	cerebellum_suit	True	4	crossed	False	6	Wed Nov 24 01:10:46 2021
826	s08	0.4054032203619217	0.39132501778173706	100	0.4403346758535711	0.14524763601070956	ridge_Schaefer_7_100_alpha_8	L2regression	glm7	sc1	sess	True	Schaefer_7_100	cerebellum_suit	True	4	crossed	False	8	Wed Nov 24 01:10:47 2021
827	s26	0.3365452771898946	0.4840246971170893	100	0.37328281683429615	0.2370143244581241	ridge_Schaefer_7_100_alpha_8	L2regression	glm7	sc1	sess	True	Schaefer_7_100	cerebellum_suit	True	4	crossed	False	8	Wed Nov 24 01:10:49 2021
828	s04	0.3167779940105475	0.443738406648252	100	0.3654875236082419	0.2069066489271561	ridge_Schaefer_7_100_alpha_8	L2regression	glm7	sc1	sess	True	Schaefer_7_100	cerebellum_suit	True	4	crossed	False	8	Wed Nov 24 01:10:50 2021
829	s14	0.3274367845441295	0.4506813291093622	100	0.3620618245140486	0.2845028023244371	ridge_Schaefer_7_100_alpha_8	L2regression	glm7	sc1	sess	True	Schaefer_7_100	cerebellum_suit	True	4	crossed	False	8	Wed Nov 24 01:10:51 2021
830	s06	0.2999249428509108	0.6235538212947653	100	0.34834956287103164	0.4012161936634637	ridge_Schaefer_7_100_alpha_8	L2regression	glm7	sc1	sess	True	Schaefer_7_100	cerebellum_suit	True	4	crossed	False	8	Wed Nov 24 01:10:53 2021
831	s22	0.36528435641855656	0.6544891688300041	100	0.43768047614429584	0.4696544272933287	ridge_Schaefer_7_100_alpha_8	L2regression	glm7	sc1	sess	True	Schaefer_7_100	cerebellum_suit	True	4	crossed	False	8	Wed Nov 24 01:10:54 2021
832	s21	0.3654725836404121	0.4346316334146892	100	0.4079688051778446	0.007879166044889759	ridge_Schaefer_7_100_alpha_8	L2regression	glm7	sc1	sess	True	Schaefer_7_100	cerebellum_suit	True	4	crossed	False	8	Wed Nov 24 01:10:55 2021
833	s08	0.4181732553451945	0.28935105971039426	100	0.4411340042806352	0.10947197382991107	ridge_Schaefer_7_100_alpha_10	L2regression	glm7	sc1	sess	True	Schaefer_7_100	cerebellum_suit	True	4	crossed	False	10	Wed Nov 24 01:10:57 2021
834	s26	0.3523982518280525	0.3945489422654469	100	0.3795468344238068	0.20987668371051849	ridge_Schaefer_7_100_alpha_10	L2regression	glm7	sc1	sess	True	Schaefer_7_100	cerebellum_suit	True	4	crossed	False	10	Wed Nov 24 01:10:58 2021
835	s04	0.3306074437658777	0.3541867394868779	100	0.37059679203484014	0.17888254265520545	ridge_Schaefer_7_100_alpha_10	L2regression	glm7	sc1	sess	True	Schaefer_7_100	cerebellum_suit	True	4	crossed	False	10	Wed Nov 24 01:10:59 2021
836	s14	0.3445243389807727	0.3750483177020109	100	0.3709806819783607	0.2624042137529645	ridge_Schaefer_7_100_alpha_10	L2regression	glm7	sc1	sess	True	Schaefer_7_100	cerebellum_suit	True	4	crossed	False	10	Wed Nov 24 01:11:01 2021
837	s06	0.3230462446508156	0.5851376379054677	100	0.363224524214687	0.3794368422545842	ridge_Schaefer_7_100_alpha_10	L2regression	glm7	sc1	sess	True	Schaefer_7_100	cerebellum_suit	True	4	crossed	False	10	Wed Nov 24 01:11:02 2021
838	s22	0.3938977090066785	0.6101498198170214	100	0.4613109475034538	0.4420797024887766	ridge_Schaefer_7_100_alpha_10	L2regression	glm7	sc1	sess	True	Schaefer_7_100	cerebellum_suit	True	4	crossed	False	10	Wed Nov 24 01:11:04 2021
839	s21	0.37803114753287664	0.3359035253443579	100	0.4063143976556163	-0.009725124997097823	ridge_Schaefer_7_100_alpha_10	L2regression	glm7	sc1	sess	True	Schaefer_7_100	cerebellum_suit	True	4	crossed	False	10	Wed Nov 24 01:11:05 2021
931	s08	0.0004088584872716317	0.9999996598917276	1848	0.5527111870934713	0.14656529271948832	ridge_tessels1002_alpha_-2	L2regression	glm7	sc1	sess	True	tessels1002	cerebellum_suit	True	4	crossed	False	-2	Tue Nov 23 07:52:38 2021
932	s26	0.0003068279686089375	0.9999997367272851	1848	0.42991810656871465	0.27253511568323296	ridge_tessels1002_alpha_-2	L2regression	glm7	sc1	sess	True	tessels1002	cerebellum_suit	True	4	crossed	False	-2	Tue Nov 23 07:52:40 2021
933	s04	0.00025189491020816433	0.9999997953111726	1848	0.4154988792292359	0.25328361090484386	ridge_tessels1002_alpha_-2	L2regression	glm7	sc1	sess	True	tessels1002	cerebellum_suit	True	4	crossed	False	-2	Tue Nov 23 07:52:42 2021
934	s14	0.0004164165114500617	0.9999994628477424	1848	0.4491198800653305	0.225397897457592	ridge_tessels1002_alpha_-2	L2regression	glm7	sc1	sess	True	tessels1002	cerebellum_suit	True	4	crossed	False	-2	Tue Nov 23 07:52:45 2021
935	s06	0.0002542687311767186	0.9999997852403824	1848	0.377759370837572	0.426875750082606	ridge_tessels1002_alpha_-2	L2regression	glm7	sc1	sess	True	tessels1002	cerebellum_suit	True	4	crossed	False	-2	Tue Nov 23 07:52:47 2021
936	s22	0.00024153798214128058	0.9999998777663206	1848	0.4680446118545866	0.44104105385776055	ridge_tessels1002_alpha_-2	L2regression	glm7	sc1	sess	True	tessels1002	cerebellum_suit	True	4	crossed	False	-2	Tue Nov 23 07:52:49 2021
937	s21	0.00028833189742069886	0.9999997831468046	1848	0.5182435074397372	0.03882543563578629	ridge_tessels1002_alpha_-2	L2regression	glm7	sc1	sess	True	tessels1002	cerebellum_suit	True	4	crossed	False	-2	Tue Nov 23 07:52:51 2021
938	s08	0.002966722611432709	0.9999820621917828	1848	0.5518949170222345	0.14698115293656092	ridge_tessels1002_alpha_0	L2regression	glm7	sc1	sess	True	tessels1002	cerebellum_suit	True	4	crossed	False	0	Tue Nov 23 07:52:53 2021
939	s26	0.002232334474303638	0.9999860355735594	1848	0.4293631583588117	0.2728823662127607	ridge_tessels1002_alpha_0	L2regression	glm7	sc1	sess	True	tessels1002	cerebellum_suit	True	4	crossed	False	0	Tue Nov 23 07:52:56 2021
940	s04	0.0018303245627017337	0.9999891811847929	1848	0.41496388409163415	0.2538434185900728	ridge_tessels1002_alpha_0	L2regression	glm7	sc1	sess	True	tessels1002	cerebellum_suit	True	4	crossed	False	0	Tue Nov 23 07:52:58 2021
941	s14	0.0030056491194868275	0.9999719508370776	1848	0.4481075170916585	0.22594572248743625	ridge_tessels1002_alpha_0	L2regression	glm7	sc1	sess	True	tessels1002	cerebellum_suit	True	4	crossed	False	0	Tue Nov 23 07:53:00 2021
942	s06	0.0018489926746183601	0.9999886255131104	1848	0.3773234672063216	0.42734185912687217	ridge_tessels1002_alpha_0	L2regression	glm7	sc1	sess	True	tessels1002	cerebellum_suit	True	4	crossed	False	0	Tue Nov 23 07:53:02 2021
943	s22	0.0017635339454513187	0.9999934754631008	1848	0.4676368866784708	0.4415144394814138	ridge_tessels1002_alpha_0	L2regression	glm7	sc1	sess	True	tessels1002	cerebellum_suit	True	4	crossed	False	0	Tue Nov 23 07:53:04 2021
944	s21	0.0020953313645985247	0.9999885388347438	1848	0.5175685451280987	0.0389301381524538	ridge_tessels1002_alpha_0	L2regression	glm7	sc1	sess	True	tessels1002	cerebellum_suit	True	4	crossed	False	0	Tue Nov 23 07:53:06 2021
945	s08	0.019426896031806296	0.999222863480338	1848	0.546594867381062	0.14966343873263765	ridge_tessels1002_alpha_2	L2regression	glm7	sc1	sess	True	tessels1002	cerebellum_suit	True	4	crossed	False	2	Tue Nov 23 07:53:09 2021
946	s26	0.014858488980885138	0.9993730588376664	1848	0.4257294029140538	0.2752105816037416	ridge_tessels1002_alpha_2	L2regression	glm7	sc1	sess	True	tessels1002	cerebellum_suit	True	4	crossed	False	2	Tue Nov 23 07:53:11 2021
947	s04	0.01208495856661395	0.9995252664580988	1848	0.4114979497807567	0.2575291148782264	ridge_tessels1002_alpha_2	L2regression	glm7	sc1	sess	True	tessels1002	cerebellum_suit	True	4	crossed	False	2	Tue Nov 23 07:53:13 2021
948	s14	0.019072283438249724	0.9988553263517428	1848	0.4418675787971225	0.2293534085269705	ridge_tessels1002_alpha_2	L2regression	glm7	sc1	sess	True	tessels1002	cerebellum_suit	True	4	crossed	False	2	Tue Nov 23 07:53:15 2021
949	s06	0.01226358280755472	0.9994945139330644	1848	0.3744966760259855	0.4303267513376237	ridge_tessels1002_alpha_2	L2regression	glm7	sc1	sess	True	tessels1002	cerebellum_suit	True	4	crossed	False	2	Tue Nov 23 07:53:17 2021
950	s22	0.011999359626963423	0.9996953750982774	1848	0.4649329008156015	0.4446599585029618	ridge_tessels1002_alpha_2	L2regression	glm7	sc1	sess	True	tessels1002	cerebellum_suit	True	4	crossed	False	2	Tue Nov 23 07:53:19 2021
951	s21	0.013849271587934815	0.9994970306858479	1848	0.5131936886517017	0.03960798398079295	ridge_tessels1002_alpha_2	L2regression	glm7	sc1	sess	True	tessels1002	cerebellum_suit	True	4	crossed	False	2	Tue Nov 23 07:53:21 2021
952	s08	0.08378413240473831	0.985126753605102	1848	0.5246872155723312	0.1606453452819232	ridge_tessels1002_alpha_4	L2regression	glm7	sc1	sess	True	tessels1002	cerebellum_suit	True	4	crossed	False	4	Tue Nov 23 07:53:24 2021
953	s26	0.06711772235478017	0.986517458869282	1848	0.4110135347050582	0.28539099766837195	ridge_tessels1002_alpha_4	L2regression	glm7	sc1	sess	True	tessels1002	cerebellum_suit	True	4	crossed	False	4	Tue Nov 23 07:53:26 2021
954	s04	0.05323299794301136	0.9906410631007372	1848	0.3979349104509864	0.2727246249313462	ridge_tessels1002_alpha_4	L2regression	glm7	sc1	sess	True	tessels1002	cerebellum_suit	True	4	crossed	False	4	Tue Nov 23 07:53:28 2021
955	s14	0.07505991801210389	0.9816573387477532	1848	0.4212014920997321	0.24092733752685525	ridge_tessels1002_alpha_4	L2regression	glm7	sc1	sess	True	tessels1002	cerebellum_suit	True	4	crossed	False	4	Tue Nov 23 07:53:30 2021
956	s06	0.05451341011109575	0.9896511729523436	1848	0.3634402786351462	0.4410482486364825	ridge_tessels1002_alpha_4	L2regression	glm7	sc1	sess	True	tessels1002	cerebellum_suit	True	4	crossed	False	4	Tue Nov 23 07:53:32 2021
957	s22	0.05824524404819821	0.9925847855112668	1848	0.4536293732036773	0.4576265976705773	ridge_tessels1002_alpha_4	L2regression	glm7	sc1	sess	True	tessels1002	cerebellum_suit	True	4	crossed	False	4	Tue Nov 23 07:53:34 2021
958	s21	0.061591595682677074	0.9899886049053512	1848	0.4960040555736448	0.04236594300847648	ridge_tessels1002_alpha_4	L2regression	glm7	sc1	sess	True	tessels1002	cerebellum_suit	True	4	crossed	False	4	Tue Nov 23 07:53:36 2021
959	s08	0.1967953729824836	0.9138669272686352	1848	0.4826972511760537	0.18126294983171445	ridge_tessels1002_alpha_6	L2regression	glm7	sc1	sess	True	tessels1002	cerebellum_suit	True	4	crossed	False	6	Tue Nov 23 07:53:38 2021
960	s26	0.15900625555756154	0.9175296871970892	1848	0.3875194045142849	0.29834590951737955	ridge_tessels1002_alpha_6	L2regression	glm7	sc1	sess	True	tessels1002	cerebellum_suit	True	4	crossed	False	6	Tue Nov 23 07:53:40 2021
961	s04	0.1289615475102798	0.9453724585120892	1848	0.3759605232455151	0.29556526785947834	ridge_tessels1002_alpha_6	L2regression	glm7	sc1	sess	True	tessels1002	cerebellum_suit	True	4	crossed	False	6	Tue Nov 23 07:53:43 2021
962	s14	0.16216681377324016	0.9105276765968008	1848	0.3919504996729536	0.2613924711833091	ridge_tessels1002_alpha_6	L2regression	glm7	sc1	sess	True	tessels1002	cerebellum_suit	True	4	crossed	False	6	Tue Nov 23 07:53:45 2021
963	s06	0.12819214545399002	0.9402429230747746	1848	0.34613779141614803	0.4518918047460106	ridge_tessels1002_alpha_6	L2regression	glm7	sc1	sess	True	tessels1002	cerebellum_suit	True	4	crossed	False	6	Tue Nov 23 07:53:47 2021
964	s22	0.1507922070803997	0.9474354171009054	1848	0.4339305369897856	0.47551296218429795	ridge_tessels1002_alpha_6	L2regression	glm7	sc1	sess	True	tessels1002	cerebellum_suit	True	4	crossed	False	6	Tue Nov 23 07:53:49 2021
965	s21	0.1525054686584591	0.9396271396751597	1848	0.4650017897665914	0.05094151128803091	ridge_tessels1002_alpha_6	L2regression	glm7	sc1	sess	True	tessels1002	cerebellum_suit	True	4	crossed	False	6	Tue Nov 23 07:53:51 2021
966	s08	0.30998054565493965	0.7550193742861943	1848	0.4453297320405493	0.20098853880923054	ridge_tessels1002_alpha_8	L2regression	glm7	sc1	sess	True	tessels1002	cerebellum_suit	True	4	crossed	False	8	Tue Nov 23 07:53:53 2021
967	s26	0.2485528274670113	0.7791678605747098	1848	0.3689495486468998	0.2923943583027384	ridge_tessels1002_alpha_8	L2regression	glm7	sc1	sess	True	tessels1002	cerebellum_suit	True	4	crossed	False	8	Tue Nov 23 07:53:56 2021
968	s04	0.2226371334049577	0.8231635604239168	1848	0.3583809213038456	0.30044009628145274	ridge_tessels1002_alpha_8	L2regression	glm7	sc1	sess	True	tessels1002	cerebellum_suit	True	4	crossed	False	8	Tue Nov 23 07:53:58 2021
969	s14	0.24911350948122096	0.7605059597135687	1848	0.3633569306828468	0.2983711678170524	ridge_tessels1002_alpha_8	L2regression	glm7	sc1	sess	True	tessels1002	cerebellum_suit	True	4	crossed	False	8	Tue Nov 23 07:54:00 2021
970	s06	0.20916335580130987	0.8283963837841379	1848	0.3313518356057309	0.4515148246781031	ridge_tessels1002_alpha_8	L2regression	glm7	sc1	sess	True	tessels1002	cerebellum_suit	True	4	crossed	False	8	Tue Nov 23 07:54:02 2021
971	s22	0.2526384122556734	0.8408535608207852	1848	0.4112182197401957	0.4933548798527585	ridge_tessels1002_alpha_8	L2regression	glm7	sc1	sess	True	tessels1002	cerebellum_suit	True	4	crossed	False	8	Tue Nov 23 07:54:04 2021
972	s21	0.26180452798621096	0.8130415317419466	1848	0.425774708148668	0.06497431483499032	ridge_tessels1002_alpha_8	L2regression	glm7	sc1	sess	True	tessels1002	cerebellum_suit	True	4	crossed	False	8	Tue Nov 23 07:54:06 2021
973	s08	0.3821962130733768	0.5697681548721504	1848	0.4369823697481022	0.1908164514421638	ridge_tessels1002_alpha_10	L2regression	glm7	sc1	sess	True	tessels1002	cerebellum_suit	True	4	crossed	False	10	Tue Nov 23 07:54:09 2021
974	s26	0.3140840481960759	0.6248146918109866	1848	0.3684824230096855	0.2695632893047715	ridge_tessels1002_alpha_10	L2regression	glm7	sc1	sess	True	tessels1002	cerebellum_suit	True	4	crossed	False	10	Tue Nov 23 07:54:11 2021
975	s04	0.293001445539337	0.6421288152608547	1848	0.3596300178299346	0.2717636684390096	ridge_tessels1002_alpha_10	L2regression	glm7	sc1	sess	True	tessels1002	cerebellum_suit	True	4	crossed	False	10	Tue Nov 23 07:54:13 2021
976	s14	0.3076422008535588	0.5836815645770029	1848	0.3576829889912693	0.3095507760087216	ridge_tessels1002_alpha_10	L2regression	glm7	sc1	sess	True	tessels1002	cerebellum_suit	True	4	crossed	False	10	Tue Nov 23 07:54:16 2021
977	s06	0.274543701963881	0.7078621498144193	1848	0.3363660427391401	0.4436626568119131	ridge_tessels1002_alpha_10	L2regression	glm7	sc1	sess	True	tessels1002	cerebellum_suit	True	4	crossed	False	10	Tue Nov 23 07:54:18 2021
978	s22	0.33489801969121746	0.7357248237363432	1848	0.42295562544395743	0.4914377064717598	ridge_tessels1002_alpha_10	L2regression	glm7	sc1	sess	True	tessels1002	cerebellum_suit	True	4	crossed	False	10	Tue Nov 23 07:54:20 2021
979	s21	0.3415131471698846	0.6395261969438005	1848	0.4078284960528573	0.051708771199933716	ridge_tessels1002_alpha_10	L2regression	glm7	sc1	sess	True	tessels1002	cerebellum_suit	True	4	crossed	False	10	Tue Nov 23 07:54:22 2021
980	s08	0.0008481907232152668	0.9999984858001147	1190	0.5740113230929872	0.12343255122636201	ridge_tessels0642_alpha_-2	L2regression	glm7	sc1	sess	True	tessels0642	cerebellum_suit	True	4	crossed	False	-2	Tue Nov 23 07:50:50 2021
981	s26	0.0006187246464500741	0.9999989003008524	1190	0.4344568103728429	0.2849689169192308	ridge_tessels0642_alpha_-2	L2regression	glm7	sc1	sess	True	tessels0642	cerebellum_suit	True	4	crossed	False	-2	Tue Nov 23 07:50:52 2021
982	s04	0.0004966519901253594	0.9999991896829541	1190	0.4192696669593843	0.2525255740038696	ridge_tessels0642_alpha_-2	L2regression	glm7	sc1	sess	True	tessels0642	cerebellum_suit	True	4	crossed	False	-2	Tue Nov 23 07:50:54 2021
983	s14	0.0008476767142782018	0.9999977335184622	1190	0.4554260249301705	0.22634980004165306	ridge_tessels0642_alpha_-2	L2regression	glm7	sc1	sess	True	tessels0642	cerebellum_suit	True	4	crossed	False	-2	Tue Nov 23 07:50:57 2021
984	s06	0.0005187636929564124	0.999999090313615	1190	0.390812455623026	0.408870955689894	ridge_tessels0642_alpha_-2	L2regression	glm7	sc1	sess	True	tessels0642	cerebellum_suit	True	4	crossed	False	-2	Tue Nov 23 07:50:59 2021
985	s22	0.00047288995283163417	0.9999995239176488	1190	0.4755879881809734	0.4379132052846054	ridge_tessels0642_alpha_-2	L2regression	glm7	sc1	sess	True	tessels0642	cerebellum_suit	True	4	crossed	False	-2	Tue Nov 23 07:51:01 2021
986	s21	0.0005654072732894557	0.9999991466438964	1190	0.5259634733212554	0.04434702137011435	ridge_tessels0642_alpha_-2	L2regression	glm7	sc1	sess	True	tessels0642	cerebellum_suit	True	4	crossed	False	-2	Tue Nov 23 07:51:03 2021
987	s08	0.006026781358646031	0.9999233056061944	1190	0.5719692029918453	0.12449955578771447	ridge_tessels0642_alpha_0	L2regression	glm7	sc1	sess	True	tessels0642	cerebellum_suit	True	4	crossed	False	0	Tue Nov 23 07:51:05 2021
988	s26	0.0044243105883969725	0.9999435691000226	1190	0.4332022229197661	0.28557153132775603	ridge_tessels0642_alpha_0	L2regression	glm7	sc1	sess	True	tessels0642	cerebellum_suit	True	4	crossed	False	0	Tue Nov 23 07:51:07 2021
989	s04	0.003546152261388867	0.9999586189074514	1190	0.4180335262048537	0.2538607141118767	ridge_tessels0642_alpha_0	L2regression	glm7	sc1	sess	True	tessels0642	cerebellum_suit	True	4	crossed	False	0	Tue Nov 23 07:51:09 2021
990	s14	0.005967768845995782	0.9998871676599864	1190	0.4532182371258399	0.22760866862896176	ridge_tessels0642_alpha_0	L2regression	glm7	sc1	sess	True	tessels0642	cerebellum_suit	True	4	crossed	False	0	Tue Nov 23 07:51:11 2021
991	s06	0.0037057736879528287	0.9999534413970708	1190	0.3897632359005103	0.4099700224017524	ridge_tessels0642_alpha_0	L2regression	glm7	sc1	sess	True	tessels0642	cerebellum_suit	True	4	crossed	False	0	Tue Nov 23 07:51:13 2021
992	s22	0.0034100413970139343	0.9999751834358352	1190	0.4747075559708909	0.4388176221056664	ridge_tessels0642_alpha_0	L2regression	glm7	sc1	sess	True	tessels0642	cerebellum_suit	True	4	crossed	False	0	Tue Nov 23 07:51:15 2021
993	s21	0.0040396288329370466	0.9999563817488958	1190	0.5244400381194089	0.044490497958727566	ridge_tessels0642_alpha_0	L2regression	glm7	sc1	sess	True	tessels0642	cerebellum_suit	True	4	crossed	False	0	Tue Nov 23 07:51:17 2021
994	s08	0.035206246198893884	0.9973410616915288	1190	0.5603068178828217	0.13070973659194474	ridge_tessels0642_alpha_2	L2regression	glm7	sc1	sess	True	tessels0642	cerebellum_suit	True	4	crossed	False	2	Tue Nov 23 07:51:19 2021
995	s26	0.026707648651140947	0.9979012161329632	1190	0.4259693603049958	0.2891037185776201	ridge_tessels0642_alpha_2	L2regression	glm7	sc1	sess	True	tessels0642	cerebellum_suit	True	4	crossed	False	2	Tue Nov 23 07:51:20 2021
996	s04	0.021235868024568314	0.9985029109353664	1190	0.4109826511632233	0.2617036007571006	ridge_tessels0642_alpha_2	L2regression	glm7	sc1	sess	True	tessels0642	cerebellum_suit	True	4	crossed	False	2	Tue Nov 23 07:51:22 2021
997	s14	0.033322889625530074	0.9964063610128666	1190	0.441512427344841	0.2343052093223934	ridge_tessels0642_alpha_2	L2regression	glm7	sc1	sess	True	tessels0642	cerebellum_suit	True	4	crossed	False	2	Tue Nov 23 07:51:24 2021
998	s06	0.02222481206120008	0.9982973309641088	1190	0.3836343874928229	0.4163334581165228	ridge_tessels0642_alpha_2	L2regression	glm7	sc1	sess	True	tessels0642	cerebellum_suit	True	4	crossed	False	2	Tue Nov 23 07:51:26 2021
999	s22	0.021525907871997367	0.9989968417489004	1190	0.4693476948132977	0.4443564539408633	ridge_tessels0642_alpha_2	L2regression	glm7	sc1	sess	True	tessels0642	cerebellum_suit	True	4	crossed	False	2	Tue Nov 23 07:51:28 2021
1000	s21	0.024281108151590968	0.9984145705447866	1190	0.5156691035861131	0.045268175125973684	ridge_tessels0642_alpha_2	L2regression	glm7	sc1	sess	True	tessels0642	cerebellum_suit	True	4	crossed	False	2	Tue Nov 23 07:51:30 2021
1001	s08	0.11796464781564475	0.9693246253272138	1190	0.5250087064568325	0.15038903804093173	ridge_tessels0642_alpha_4	L2regression	glm7	sc1	sess	True	tessels0642	cerebellum_suit	True	4	crossed	False	4	Tue Nov 23 07:51:32 2021
1002	s26	0.0947013419945826	0.972023708497959	1190	0.4058481706699755	0.29859304231257683	ridge_tessels0642_alpha_4	L2regression	glm7	sc1	sess	True	tessels0642	cerebellum_suit	True	4	crossed	False	4	Tue Nov 23 07:51:34 2021
1003	s04	0.07433827614383155	0.981467857561726	1190	0.3920778842849713	0.2833972733914825	ridge_tessels0642_alpha_4	L2regression	glm7	sc1	sess	True	tessels0642	cerebellum_suit	True	4	crossed	False	4	Tue Nov 23 07:51:36 2021
1004	s14	0.1022251878412338	0.9649606053354908	1190	0.4145690224753175	0.24967069829981664	ridge_tessels0642_alpha_4	L2regression	glm7	sc1	sess	True	tessels0642	cerebellum_suit	True	4	crossed	False	4	Tue Nov 23 07:51:38 2021
1005	s06	0.07704970384727089	0.9786893434242506	1190	0.3656215264103657	0.4339153880189737	ridge_tessels0642_alpha_4	L2regression	glm7	sc1	sess	True	tessels0642	cerebellum_suit	True	4	crossed	False	4	Tue Nov 23 07:51:39 2021
1006	s22	0.08389274273100368	0.9841454126527884	1190	0.4522485453947646	0.4617728454826167	ridge_tessels0642_alpha_4	L2regression	glm7	sc1	sess	True	tessels0642	cerebellum_suit	True	4	crossed	False	4	Tue Nov 23 07:51:41 2021
1007	s21	0.0863513448816469	0.9799970169732816	1190	0.4911745532139936	0.046804796715209936	ridge_tessels0642_alpha_4	L2regression	glm7	sc1	sess	True	tessels0642	cerebellum_suit	True	4	crossed	False	4	Tue Nov 23 07:51:43 2021
1008	s08	0.2330667492090041	0.8724635689570386	1190	0.4750613238486897	0.17849777629479602	ridge_tessels0642_alpha_6	L2regression	glm7	sc1	sess	True	tessels0642	cerebellum_suit	True	4	crossed	False	6	Tue Nov 23 07:51:45 2021
1009	s26	0.187591721400984	0.8799575649360832	1190	0.3826922525887889	0.3017644725155109	ridge_tessels0642_alpha_6	L2regression	glm7	sc1	sess	True	tessels0642	cerebellum_suit	True	4	crossed	False	6	Tue Nov 23 07:51:47 2021
1010	s04	0.15588076881005591	0.9184275485361744	1190	0.37097178167879	0.2994975502202028	ridge_tessels0642_alpha_6	L2regression	glm7	sc1	sess	True	tessels0642	cerebellum_suit	True	4	crossed	False	6	Tue Nov 23 07:51:49 2021
1011	s14	0.19006417229960806	0.8712893036310849	1190	0.3840341257269183	0.2722329907641047	ridge_tessels0642_alpha_6	L2regression	glm7	sc1	sess	True	tessels0642	cerebellum_suit	True	4	crossed	False	6	Tue Nov 23 07:51:51 2021
1012	s06	0.15267886911020614	0.912357696863528	1190	0.3445820031441397	0.4476044242186707	ridge_tessels0642_alpha_6	L2regression	glm7	sc1	sess	True	tessels0642	cerebellum_suit	True	4	crossed	False	6	Tue Nov 23 07:51:53 2021
1013	s22	0.18094088790678511	0.9214258506757992	1190	0.4289482330144729	0.4807643430604613	ridge_tessels0642_alpha_6	L2regression	glm7	sc1	sess	True	tessels0642	cerebellum_suit	True	4	crossed	False	6	Tue Nov 23 07:51:55 2021
1014	s21	0.1842611090120025	0.9097511201893312	1190	0.4573167813010369	0.052220175043966	ridge_tessels0642_alpha_6	L2regression	glm7	sc1	sess	True	tessels0642	cerebellum_suit	True	4	crossed	False	6	Tue Nov 23 07:51:57 2021
1015	s08	0.3338494723122739	0.6992094511443674	1190	0.4412475232721227	0.199691439805751	ridge_tessels0642_alpha_8	L2regression	glm7	sc1	sess	True	tessels0642	cerebellum_suit	True	4	crossed	False	8	Tue Nov 23 07:51:59 2021
1016	s26	0.2687255597424864	0.7302720559442981	1190	0.3668188062923333	0.2906465971611531	ridge_tessels0642_alpha_8	L2regression	glm7	sc1	sess	True	tessels0642	cerebellum_suit	True	4	crossed	False	8	Tue Nov 23 07:52:01 2021
1017	s04	0.24552893658798736	0.7706849770916107	1190	0.35751577444655075	0.2934194590089329	ridge_tessels0642_alpha_8	L2regression	glm7	sc1	sess	True	tessels0642	cerebellum_suit	True	4	crossed	False	8	Tue Nov 23 07:52:03 2021
1018	s14	0.2679112027188863	0.7083429893446213	1190	0.3594355588059471	0.3062989971125882	ridge_tessels0642_alpha_8	L2regression	glm7	sc1	sess	True	tessels0642	cerebellum_suit	True	4	crossed	False	8	Tue Nov 23 07:52:04 2021
1019	s06	0.22844057128878245	0.7876003268847273	1190	0.3303743129718317	0.4472041880728768	ridge_tessels0642_alpha_8	L2regression	glm7	sc1	sess	True	tessels0642	cerebellum_suit	True	4	crossed	False	8	Tue Nov 23 07:52:06 2021
1020	s22	0.2754274312535896	0.8067579324228827	1190	0.4090427908316243	0.4961734201847636	ridge_tessels0642_alpha_8	L2regression	glm7	sc1	sess	True	tessels0642	cerebellum_suit	True	4	crossed	False	8	Tue Nov 23 07:52:08 2021
1021	s21	0.2877250658910923	0.7608157468981005	1190	0.41999827247987104	0.06009842877547913	ridge_tessels0642_alpha_8	L2regression	glm7	sc1	sess	True	tessels0642	cerebellum_suit	True	4	crossed	False	8	Tue Nov 23 07:52:10 2021
1022	s08	0.3931488344304448	0.5141400637648943	1190	0.4379427281633648	0.1784099517671475	ridge_tessels0642_alpha_10	L2regression	glm7	sc1	sess	True	tessels0642	cerebellum_suit	True	4	crossed	False	10	Tue Nov 23 07:52:12 2021
1023	s26	0.32479972723580275	0.5840131997389221	1190	0.37039562837451145	0.2639476900347318	ridge_tessels0642_alpha_10	L2regression	glm7	sc1	sess	True	tessels0642	cerebellum_suit	True	4	crossed	False	10	Tue Nov 23 07:52:14 2021
1024	s04	0.304100240909116	0.5861113921690051	1190	0.3618498185503061	0.2567531925236732	ridge_tessels0642_alpha_10	L2regression	glm7	sc1	sess	True	tessels0642	cerebellum_suit	True	4	crossed	False	10	Tue Nov 23 07:52:16 2021
1025	s14	0.3172648730045014	0.5371657862661099	1190	0.359592490988528	0.3027364814662755	ridge_tessels0642_alpha_10	L2regression	glm7	sc1	sess	True	tessels0642	cerebellum_suit	True	4	crossed	False	10	Tue Nov 23 07:52:18 2021
1026	s06	0.2868221704188498	0.6826819110549681	1190	0.3416695329803087	0.4370054440027793	ridge_tessels0642_alpha_10	L2regression	glm7	sc1	sess	True	tessels0642	cerebellum_suit	True	4	crossed	False	10	Tue Nov 23 07:52:20 2021
1027	s22	0.3501414735983436	0.714459369233508	1190	0.4313148772535601	0.4851079002875691	ridge_tessels0642_alpha_10	L2regression	glm7	sc1	sess	True	tessels0642	cerebellum_suit	True	4	crossed	False	10	Tue Nov 23 07:52:22 2021
1028	s21	0.3531288009784322	0.5840355261834149	1190	0.4072725429788348	0.03927732253758219	ridge_tessels0642_alpha_10	L2regression	glm7	sc1	sess	True	tessels0642	cerebellum_suit	True	4	crossed	False	10	Tue Nov 23 07:52:24 2021
1029	s08	0.0022831653267618877	0.9999886640940572	670	0.5884039972330183	0.1290961911256294	ridge_tessels0362_alpha_-2	L2regression	glm7	sc1	sess	True	tessels0362	cerebellum_suit	True	4	crossed	False	-2	Tue Nov 23 07:49:15 2021
1030	s26	0.0017234391638781118	0.9999910083181052	670	0.443645585322966	0.2909957833525289	ridge_tessels0362_alpha_-2	L2regression	glm7	sc1	sess	True	tessels0362	cerebellum_suit	True	4	crossed	False	-2	Tue Nov 23 07:49:16 2021
1031	s04	0.0013413843154738187	0.9999939434174449	670	0.44281613405045694	0.2239722802974971	ridge_tessels0362_alpha_-2	L2regression	glm7	sc1	sess	True	tessels0362	cerebellum_suit	True	4	crossed	False	-2	Tue Nov 23 07:49:18 2021
1032	s14	0.0023703368832793106	0.9999815161939748	670	0.4686111610901471	0.22421595261079602	ridge_tessels0362_alpha_-2	L2regression	glm7	sc1	sess	True	tessels0362	cerebellum_suit	True	4	crossed	False	-2	Tue Nov 23 07:49:20 2021
1033	s06	0.0014745292679175105	0.9999924251559682	670	0.4077984181325277	0.3901685539257075	ridge_tessels0362_alpha_-2	L2regression	glm7	sc1	sess	True	tessels0362	cerebellum_suit	True	4	crossed	False	-2	Tue Nov 23 07:49:22 2021
1034	s22	0.0012552780911182628	0.9999965547161744	670	0.4832252354522546	0.4394634050319205	ridge_tessels0362_alpha_-2	L2regression	glm7	sc1	sess	True	tessels0362	cerebellum_suit	True	4	crossed	False	-2	Tue Nov 23 07:49:24 2021
1035	s21	0.0014541445250787336	0.9999941142585044	670	0.5419790411364355	0.040266102026160086	ridge_tessels0362_alpha_-2	L2regression	glm7	sc1	sess	True	tessels0362	cerebellum_suit	True	4	crossed	False	-2	Tue Nov 23 07:49:25 2021
1036	s08	0.0151641147482113	0.9994961890943802	670	0.582311973625126	0.1317987969835139	ridge_tessels0362_alpha_0	L2regression	glm7	sc1	sess	True	tessels0362	cerebellum_suit	True	4	crossed	False	0	Tue Nov 23 07:49:27 2021
1037	s26	0.011561624223460965	0.9995924211117404	670	0.4392405889753787	0.29288543147358936	ridge_tessels0362_alpha_0	L2regression	glm7	sc1	sess	True	tessels0362	cerebellum_suit	True	4	crossed	False	0	Tue Nov 23 07:49:29 2021
1038	s04	0.009024891663739732	0.9997246229041176	670	0.438640777634024	0.2274006422538917	ridge_tessels0362_alpha_0	L2regression	glm7	sc1	sess	True	tessels0362	cerebellum_suit	True	4	crossed	False	0	Tue Nov 23 07:49:31 2021
1039	s14	0.015283196512316162	0.9992247026773168	670	0.4615229067857261	0.2282088118309343	ridge_tessels0362_alpha_0	L2regression	glm7	sc1	sess	True	tessels0362	cerebellum_suit	True	4	crossed	False	0	Tue Nov 23 07:49:32 2021
1040	s06	0.009870404386411057	0.9996583336899983	670	0.4040249073648784	0.3941470935502426	ridge_tessels0362_alpha_0	L2regression	glm7	sc1	sess	True	tessels0362	cerebellum_suit	True	4	crossed	False	0	Tue Nov 23 07:49:34 2021
1041	s22	0.008675264597283234	0.9998345073555474	670	0.4806098063776607	0.4416097952508319	ridge_tessels0362_alpha_0	L2regression	glm7	sc1	sess	True	tessels0362	cerebellum_suit	True	4	crossed	False	0	Tue Nov 23 07:49:36 2021
1042	s21	0.009804316919629227	0.9997322253403672	670	0.5370838869631531	0.04144423732296047	ridge_tessels0362_alpha_0	L2regression	glm7	sc1	sess	True	tessels0362	cerebellum_suit	True	4	crossed	False	0	Tue Nov 23 07:49:37 2021
1043	s08	0.06833336755452464	0.9895223563484252	670	0.5566879037865713	0.14348822283791354	ridge_tessels0362_alpha_2	L2regression	glm7	sc1	sess	True	tessels0362	cerebellum_suit	True	4	crossed	False	2	Tue Nov 23 07:49:39 2021
1044	s26	0.053749172432613054	0.9909399817027856	670	0.4216323005371319	0.30051409599736395	ridge_tessels0362_alpha_2	L2regression	glm7	sc1	sess	True	tessels0362	cerebellum_suit	True	4	crossed	False	2	Tue Nov 23 07:49:41 2021
1045	s04	0.0423234155021305	0.9938537994536882	670	0.4209748553296998	0.2429717447162646	ridge_tessels0362_alpha_2	L2regression	glm7	sc1	sess	True	tessels0362	cerebellum_suit	True	4	crossed	False	2	Tue Nov 23 07:49:42 2021
1046	s14	0.06270293089310862	0.9866212907172646	670	0.4366877115533469	0.2423025019463161	ridge_tessels0362_alpha_2	L2regression	glm7	sc1	sess	True	tessels0362	cerebellum_suit	True	4	crossed	False	2	Tue Nov 23 07:49:44 2021
1047	s06	0.04538130826424175	0.99258381709885	670	0.3878930323481336	0.4113946789942238	ridge_tessels0362_alpha_2	L2regression	glm7	sc1	sess	True	tessels0362	cerebellum_suit	True	4	crossed	False	2	Tue Nov 23 07:49:46 2021
1048	s22	0.04479465188998531	0.995473045588705	670	0.4682953071658109	0.4521840103438741	ridge_tessels0362_alpha_2	L2regression	glm7	sc1	sess	True	tessels0362	cerebellum_suit	True	4	crossed	False	2	Tue Nov 23 07:49:47 2021
1049	s21	0.046620848116492634	0.9939479952625799	670	0.5166086681130685	0.046477044905378746	ridge_tessels0362_alpha_2	L2regression	glm7	sc1	sess	True	tessels0362	cerebellum_suit	True	4	crossed	False	2	Tue Nov 23 07:49:49 2021
1050	s08	0.1670752343077759	0.9355310883263046	670	0.5083406799379622	0.166309106281	ridge_tessels0362_alpha_4	L2regression	glm7	sc1	sess	True	tessels0362	cerebellum_suit	True	4	crossed	False	4	Tue Nov 23 07:49:51 2021
1051	s26	0.13401246819595652	0.9406014915958192	670	0.3967941992515113	0.3076230758801871	ridge_tessels0362_alpha_4	L2regression	glm7	sc1	sess	True	tessels0362	cerebellum_suit	True	4	crossed	False	4	Tue Nov 23 07:49:52 2021
1052	s04	0.10754543397438372	0.9603152823883264	670	0.3934022935987569	0.2689105423411483	ridge_tessels0362_alpha_4	L2regression	glm7	sc1	sess	True	tessels0362	cerebellum_suit	True	4	crossed	False	4	Tue Nov 23 07:49:54 2021
1053	s14	0.139080630346218	0.9325605345030517	670	0.4056142406202983	0.25831823230297635	ridge_tessels0362_alpha_4	L2regression	glm7	sc1	sess	True	tessels0362	cerebellum_suit	True	4	crossed	False	4	Tue Nov 23 07:49:56 2021
1054	s06	0.10998985366915136	0.9548257349567773	670	0.3619980060210131	0.4361528172550305	ridge_tessels0362_alpha_4	L2regression	glm7	sc1	sess	True	tessels0362	cerebellum_suit	True	4	crossed	False	4	Tue Nov 23 07:49:58 2021
1055	s22	0.1242594708471704	0.9635611219914992	670	0.4454947868773753	0.4720515501299271	ridge_tessels0362_alpha_4	L2regression	glm7	sc1	sess	True	tessels0362	cerebellum_suit	True	4	crossed	False	4	Tue Nov 23 07:49:59 2021
1056	s21	0.12320280075367247	0.9583339674803204	670	0.4832006462810977	0.053966185907005436	ridge_tessels0362_alpha_4	L2regression	glm7	sc1	sess	True	tessels0362	cerebellum_suit	True	4	crossed	False	4	Tue Nov 23 07:50:01 2021
1057	s08	0.2774617843225193	0.8038230242486686	670	0.4607665565215496	0.1918356554926072	ridge_tessels0362_alpha_6	L2regression	glm7	sc1	sess	True	tessels0362	cerebellum_suit	True	4	crossed	False	6	Tue Nov 23 07:50:03 2021
1058	s26	0.22127937589996305	0.822582103520845	670	0.3763635092878879	0.3005650679745832	ridge_tessels0362_alpha_6	L2regression	glm7	sc1	sess	True	tessels0362	cerebellum_suit	True	4	crossed	False	6	Tue Nov 23 07:50:04 2021
1059	s04	0.19387128625569086	0.8651695261175352	670	0.3698084170376668	0.2811060379839257	ridge_tessels0362_alpha_6	L2regression	glm7	sc1	sess	True	tessels0362	cerebellum_suit	True	4	crossed	False	6	Tue Nov 23 07:50:06 2021
1060	s14	0.22264830754217285	0.8113830852741538	670	0.3751591899112279	0.28244772839967136	ridge_tessels0362_alpha_6	L2regression	glm7	sc1	sess	True	tessels0362	cerebellum_suit	True	4	crossed	False	6	Tue Nov 23 07:50:08 2021
1061	s06	0.1843066073347026	0.86486431199341	670	0.34204807380584673	0.4423347947031661	ridge_tessels0362_alpha_6	L2regression	glm7	sc1	sess	True	tessels0362	cerebellum_suit	True	4	crossed	False	6	Tue Nov 23 07:50:09 2021
1062	s22	0.21974121194528493	0.8775496106678665	670	0.42143320173933707	0.4884733123528108	ridge_tessels0362_alpha_6	L2regression	glm7	sc1	sess	True	tessels0362	cerebellum_suit	True	4	crossed	False	6	Tue Nov 23 07:50:11 2021
1063	s21	0.2244933011309642	0.8581606614558158	670	0.44414474567129547	0.06527960624824097	ridge_tessels0362_alpha_6	L2regression	glm7	sc1	sess	True	tessels0362	cerebellum_suit	True	4	crossed	False	6	Tue Nov 23 07:50:13 2021
1064	s08	0.35949225180035105	0.62448347142286	670	0.4382075186395613	0.1995165187575541	ridge_tessels0362_alpha_8	L2regression	glm7	sc1	sess	True	tessels0362	cerebellum_suit	True	4	crossed	False	8	Tue Nov 23 07:50:14 2021
1065	s26	0.29070327338004137	0.6700227412759152	670	0.3661585421419056	0.28226562656855725	ridge_tessels0362_alpha_8	L2regression	glm7	sc1	sess	True	tessels0362	cerebellum_suit	True	4	crossed	False	8	Tue Nov 23 07:50:16 2021
1066	s04	0.2713869608395905	0.6926639325148524	670	0.35898554501758195	0.2714992099381475	ridge_tessels0362_alpha_8	L2regression	glm7	sc1	sess	True	tessels0362	cerebellum_suit	True	4	crossed	False	8	Tue Nov 23 07:50:17 2021
1067	s14	0.2875731003577149	0.6437337150416167	670	0.35714588493974103	0.3098318422833477	ridge_tessels0362_alpha_8	L2regression	glm7	sc1	sess	True	tessels0362	cerebellum_suit	True	4	crossed	False	8	Tue Nov 23 07:50:19 2021
1068	s06	0.2496095529988436	0.7382286333653114	670	0.3306131378456338	0.4407264909689801	ridge_tessels0362_alpha_8	L2regression	glm7	sc1	sess	True	tessels0362	cerebellum_suit	True	4	crossed	False	8	Tue Nov 23 07:50:21 2021
1069	s22	0.301939052690181	0.7641001342339483	670	0.4097314776422816	0.4968139660757904	ridge_tessels0362_alpha_8	L2regression	glm7	sc1	sess	True	tessels0362	cerebellum_suit	True	4	crossed	False	8	Tue Nov 23 07:50:23 2021
1070	s21	0.3147439299435156	0.6927474212684833	670	0.4128984356756725	0.06560617394534088	ridge_tessels0362_alpha_8	L2regression	glm7	sc1	sess	True	tessels0362	cerebellum_suit	True	4	crossed	False	8	Tue Nov 23 07:50:24 2021
1071	s08	0.4035233069442909	0.4430311122681734	670	0.43913001000861657	0.16131410430137813	ridge_tessels0362_alpha_10	L2regression	glm7	sc1	sess	True	tessels0362	cerebellum_suit	True	4	crossed	False	10	Tue Nov 23 07:50:26 2021
1072	s26	0.3356752636134029	0.5312924014590834	670	0.3733795526250304	0.2497838931804892	ridge_tessels0362_alpha_10	L2regression	glm7	sc1	sess	True	tessels0362	cerebellum_suit	True	4	crossed	False	10	Tue Nov 23 07:50:28 2021
1073	s04	0.31499921844182643	0.5109486974670939	670	0.3649679781497368	0.22996606854534005	ridge_tessels0362_alpha_10	L2regression	glm7	sc1	sess	True	tessels0362	cerebellum_suit	True	4	crossed	False	10	Tue Nov 23 07:50:30 2021
1074	s14	0.32694124931830004	0.4836701942333138	670	0.3625864470526364	0.2913179648023675	ridge_tessels0362_alpha_10	L2regression	glm7	sc1	sess	True	tessels0362	cerebellum_suit	True	4	crossed	False	10	Tue Nov 23 07:50:31 2021
1075	s06	0.300112417785491	0.6559353008680228	670	0.34890427525196904	0.4256924323387457	ridge_tessels0362_alpha_10	L2regression	glm7	sc1	sess	True	tessels0362	cerebellum_suit	True	4	crossed	False	10	Tue Nov 23 07:50:33 2021
1076	s22	0.36665307292600574	0.6873998104088721	670	0.44189626890308814	0.4740667836638559	ridge_tessels0362_alpha_10	L2regression	glm7	sc1	sess	True	tessels0362	cerebellum_suit	True	4	crossed	False	10	Tue Nov 23 07:50:35 2021
1077	s21	0.3635986113644293	0.5152176730341429	670	0.406588863752186	0.033077736267957195	ridge_tessels0362_alpha_10	L2regression	glm7	sc1	sess	True	tessels0362	cerebellum_suit	True	4	crossed	False	10	Tue Nov 23 07:50:37 2021
1078	s08	0.010401168327249688	0.9997467945382188	304	0.6199534496110842	0.13669609096902566	ridge_tessels0162_alpha_-2	L2regression	glm7	sc1	sess	True	tessels0162	cerebellum_suit	True	4	crossed	False	-2	Tue Nov 23 07:47:55 2021
1079	s26	0.00787915509829888	0.9997986495918174	304	0.4742729050442042	0.27949269702576474	ridge_tessels0162_alpha_-2	L2regression	glm7	sc1	sess	True	tessels0162	cerebellum_suit	True	4	crossed	False	-2	Tue Nov 23 07:47:57 2021
1080	s04	0.0062910070446933	0.999857808626596	304	0.480566403935652	0.1946187081817441	ridge_tessels0162_alpha_-2	L2regression	glm7	sc1	sess	True	tessels0162	cerebellum_suit	True	4	crossed	False	-2	Tue Nov 23 07:47:58 2021
1081	s14	0.010513230993552813	0.9996186725993259	304	0.5071601334164284	0.18450145424272213	ridge_tessels0162_alpha_-2	L2regression	glm7	sc1	sess	True	tessels0162	cerebellum_suit	True	4	crossed	False	-2	Tue Nov 23 07:48:00 2021
1082	s06	0.006465296479906992	0.9998474647327716	304	0.4364734568325048	0.3509169244655082	ridge_tessels0162_alpha_-2	L2regression	glm7	sc1	sess	True	tessels0162	cerebellum_suit	True	4	crossed	False	-2	Tue Nov 23 07:48:01 2021
1083	s22	0.006186273524611952	0.9999107299803094	304	0.5295759998776083	0.3845890596762138	ridge_tessels0162_alpha_-2	L2regression	glm7	sc1	sess	True	tessels0162	cerebellum_suit	True	4	crossed	False	-2	Tue Nov 23 07:48:03 2021
1084	s21	0.0061658536753417155	0.9998879935693372	304	0.5780081990634616	0.034030327867724766	ridge_tessels0162_alpha_-2	L2regression	glm7	sc1	sess	True	tessels0162	cerebellum_suit	True	4	crossed	False	-2	Tue Nov 23 07:48:04 2021
1085	s08	0.050083805482150696	0.9940535795855616	304	0.5951709260808016	0.13968733577539322	ridge_tessels0162_alpha_0	L2regression	glm7	sc1	sess	True	tessels0162	cerebellum_suit	True	4	crossed	False	0	Tue Nov 23 07:48:05 2021
1086	s26	0.03907571818223933	0.9949948996964988	304	0.4537739067433082	0.2883548002554838	ridge_tessels0162_alpha_0	L2regression	glm7	sc1	sess	True	tessels0162	cerebellum_suit	True	4	crossed	False	0	Tue Nov 23 07:48:07 2021
1087	s04	0.0312346942574789	0.9964857660766396	304	0.4593035691525956	0.2081961886480454	ridge_tessels0162_alpha_0	L2regression	glm7	sc1	sess	True	tessels0162	cerebellum_suit	True	4	crossed	False	0	Tue Nov 23 07:48:08 2021
1088	s14	0.047369337928914575	0.9921081303613838	304	0.4762403825155001	0.20062196649103534	ridge_tessels0162_alpha_0	L2regression	glm7	sc1	sess	True	tessels0162	cerebellum_suit	True	4	crossed	False	0	Tue Nov 23 07:48:09 2021
1089	s06	0.03214625356224663	0.9961934958278564	304	0.4185564356120272	0.3689490898078043	ridge_tessels0162_alpha_0	L2regression	glm7	sc1	sess	True	tessels0162	cerebellum_suit	True	4	crossed	False	0	Tue Nov 23 07:48:11 2021
1090	s22	0.03302094575368706	0.9974292560167572	304	0.5118533010037556	0.4002910126198897	ridge_tessels0162_alpha_0	L2regression	glm7	sc1	sess	True	tessels0162	cerebellum_suit	True	4	crossed	False	0	Tue Nov 23 07:48:12 2021
1091	s21	0.032076273560387066	0.996977154901389	304	0.5578386771413193	0.036348877896508536	ridge_tessels0162_alpha_0	L2regression	glm7	sc1	sess	True	tessels0162	cerebellum_suit	True	4	crossed	False	0	Tue Nov 23 07:48:13 2021
1092	s08	0.13112844268740834	0.9587573433988896	304	0.5468457288320395	0.14723151117312394	ridge_tessels0162_alpha_2	L2regression	glm7	sc1	sess	True	tessels0162	cerebellum_suit	True	4	crossed	False	2	Tue Nov 23 07:48:15 2021
1093	s26	0.10589593480027384	0.9622031117256142	304	0.4167434652015263	0.3056444755286891	ridge_tessels0162_alpha_2	L2regression	glm7	sc1	sess	True	tessels0162	cerebellum_suit	True	4	crossed	False	2	Tue Nov 23 07:48:16 2021
1094	s04	0.08486424759728824	0.9739798978584924	304	0.4219707755382396	0.2342404323640866	ridge_tessels0162_alpha_2	L2regression	glm7	sc1	sess	True	tessels0162	cerebellum_suit	True	4	crossed	False	2	Tue Nov 23 07:48:17 2021
1095	s14	0.11341064288069727	0.9539225857652116	304	0.43020394154821	0.23032143281041845	ridge_tessels0162_alpha_2	L2regression	glm7	sc1	sess	True	tessels0162	cerebellum_suit	True	4	crossed	False	2	Tue Nov 23 07:48:19 2021
1096	s06	0.08693429820546808	0.9714373785706448	304	0.3855138549590682	0.4039975625994411	ridge_tessels0162_alpha_2	L2regression	glm7	sc1	sess	True	tessels0162	cerebellum_suit	True	4	crossed	False	2	Tue Nov 23 07:48:20 2021
1097	s22	0.09763827801228707	0.9769357539676946	304	0.4752316567387258	0.4359390981562138	ridge_tessels0162_alpha_2	L2regression	glm7	sc1	sess	True	tessels0162	cerebellum_suit	True	4	crossed	False	2	Tue Nov 23 07:48:21 2021
1098	s21	0.09253069918612124	0.9752406714851126	304	0.5172214966562835	0.04115272073927732	ridge_tessels0162_alpha_2	L2regression	glm7	sc1	sess	True	tessels0162	cerebellum_suit	True	4	crossed	False	2	Tue Nov 23 07:48:23 2021
1099	s08	0.2323485321882703	0.8649917469873132	304	0.4893548330713025	0.16971039348571182	ridge_tessels0162_alpha_4	L2regression	glm7	sc1	sess	True	tessels0162	cerebellum_suit	True	4	crossed	False	4	Tue Nov 23 07:48:24 2021
1100	s26	0.1865994858858651	0.8749960225161608	304	0.3883351011017111	0.30814270678773736	ridge_tessels0162_alpha_4	L2regression	glm7	sc1	sess	True	tessels0162	cerebellum_suit	True	4	crossed	False	4	Tue Nov 23 07:48:26 2021
1101	s04	0.15754355720166638	0.9098947667781402	304	0.3905715260029939	0.2569973291152338	ridge_tessels0162_alpha_4	L2regression	glm7	sc1	sess	True	tessels0162	cerebellum_suit	True	4	crossed	False	4	Tue Nov 23 07:48:27 2021
1102	s14	0.1895966565035037	0.8654345996970858	304	0.395463632588724	0.25580321290295444	ridge_tessels0162_alpha_4	L2regression	glm7	sc1	sess	True	tessels0162	cerebellum_suit	True	4	crossed	False	4	Tue Nov 23 07:48:28 2021
1103	s06	0.15397489627199287	0.9062936467017312	304	0.3585124645714717	0.42561245343700094	ridge_tessels0162_alpha_4	L2regression	glm7	sc1	sess	True	tessels0162	cerebellum_suit	True	4	crossed	False	4	Tue Nov 23 07:48:30 2021
1104	s22	0.1815878936078137	0.9166402425205132	304	0.4427425937207789	0.4667297699707047	ridge_tessels0162_alpha_4	L2regression	glm7	sc1	sess	True	tessels0162	cerebellum_suit	True	4	crossed	False	4	Tue Nov 23 07:48:31 2021
1105	s21	0.17917883097032544	0.9082222917696708	304	0.4754830811094597	0.048177736362504484	ridge_tessels0162_alpha_4	L2regression	glm7	sc1	sess	True	tessels0162	cerebellum_suit	True	4	crossed	False	4	Tue Nov 23 07:48:32 2021
1106	s08	0.3248882551345844	0.7029763608861624	304	0.4487414895097059	0.19366841923412773	ridge_tessels0162_alpha_6	L2regression	glm7	sc1	sess	True	tessels0162	cerebellum_suit	True	4	crossed	False	6	Tue Nov 23 07:48:34 2021
1107	s26	0.2594075972032313	0.7364167979751661	304	0.3698649025434421	0.2957495112427204	ridge_tessels0162_alpha_6	L2regression	glm7	sc1	sess	True	tessels0162	cerebellum_suit	True	4	crossed	False	6	Tue Nov 23 07:48:35 2021
1108	s04	0.2388789000551345	0.7695423554406667	304	0.3655656099369892	0.26864001764004	ridge_tessels0162_alpha_6	L2regression	glm7	sc1	sess	True	tessels0162	cerebellum_suit	True	4	crossed	False	6	Tue Nov 23 07:48:36 2021
1109	s14	0.2596760577795664	0.7182591942324791	304	0.3656742194237238	0.29193446578043397	ridge_tessels0162_alpha_6	L2regression	glm7	sc1	sess	True	tessels0162	cerebellum_suit	True	4	crossed	False	6	Tue Nov 23 07:48:37 2021
1110	s06	0.2202135162612586	0.7921970814635864	304	0.33720619080395536	0.4354777951100853	ridge_tessels0162_alpha_6	L2regression	glm7	sc1	sess	True	tessels0162	cerebellum_suit	True	4	crossed	False	6	Tue Nov 23 07:48:39 2021
1111	s22	0.26394673940363284	0.8121883860462413	304	0.4145832819414709	0.4903688435781093	ridge_tessels0162_alpha_6	L2regression	glm7	sc1	sess	True	tessels0162	cerebellum_suit	True	4	crossed	False	6	Tue Nov 23 07:48:40 2021
1112	s21	0.2747421679775912	0.7663616799609321	304	0.4309900194007512	0.0602399195399598	ridge_tessels0162_alpha_6	L2regression	glm7	sc1	sess	True	tessels0162	cerebellum_suit	True	4	crossed	False	6	Tue Nov 23 07:48:42 2021
1113	s08	0.3847396051389205	0.5262607708320175	304	0.4386568310846421	0.18027180590392214	ridge_tessels0162_alpha_8	L2regression	glm7	sc1	sess	True	tessels0162	cerebellum_suit	True	4	crossed	False	8	Tue Nov 23 07:48:43 2021
1114	s26	0.3142355892680249	0.5947216604205388	304	0.3679165181302119	0.2694438924703001	ridge_tessels0162_alpha_8	L2regression	glm7	sc1	sess	True	tessels0162	cerebellum_suit	True	4	crossed	False	8	Tue Nov 23 07:48:44 2021
1115	s04	0.2962814979450911	0.5875256610506657	304	0.361067855732762	0.2490996757037955	ridge_tessels0162_alpha_8	L2regression	glm7	sc1	sess	True	tessels0162	cerebellum_suit	True	4	crossed	False	8	Tue Nov 23 07:48:46 2021
1116	s14	0.3081508642576358	0.5590192719016902	304	0.35763424168418123	0.3051880770435512	ridge_tessels0162_alpha_8	L2regression	glm7	sc1	sess	True	tessels0162	cerebellum_suit	True	4	crossed	False	8	Tue Nov 23 07:48:47 2021
1117	s06	0.2731845224086156	0.6852608796202373	304	0.3353815410304557	0.4298144716072931	ridge_tessels0162_alpha_8	L2regression	glm7	sc1	sess	True	tessels0162	cerebellum_suit	True	4	crossed	False	8	Tue Nov 23 07:48:48 2021
1118	s22	0.3322260324614829	0.7146872864062491	304	0.4191392948798557	0.4862109023164136	ridge_tessels0162_alpha_8	L2regression	glm7	sc1	sess	True	tessels0162	cerebellum_suit	True	4	crossed	False	8	Tue Nov 23 07:48:49 2021
1119	s21	0.34274325320094745	0.5895308030367679	304	0.4095274187560718	0.0449220967932438	ridge_tessels0162_alpha_8	L2regression	glm7	sc1	sess	True	tessels0162	cerebellum_suit	True	4	crossed	False	8	Tue Nov 23 07:48:51 2021
1120	s08	0.41224155763414977	0.3603260233528563	304	0.4402949344549645	0.13515095285728404	ridge_tessels0162_alpha_10	L2regression	glm7	sc1	sess	True	tessels0162	cerebellum_suit	True	4	crossed	False	10	Tue Nov 23 07:48:53 2021
1121	s26	0.3454824506590811	0.4652396046886675	304	0.3767316522293351	0.2312306692669181	ridge_tessels0162_alpha_10	L2regression	glm7	sc1	sess	True	tessels0162	cerebellum_suit	True	4	crossed	False	10	Tue Nov 23 07:48:54 2021
1122	s04	0.3241242811960971	0.4275702636632964	304	0.3679819425761911	0.20361502984062968	ridge_tessels0162_alpha_10	L2regression	glm7	sc1	sess	True	tessels0162	cerebellum_suit	True	4	crossed	False	10	Tue Nov 23 07:48:55 2021
1123	s14	0.3364234143185023	0.4262032130652412	304	0.3666354184467071	0.27697180058030085	ridge_tessels0162_alpha_10	L2regression	glm7	sc1	sess	True	tessels0162	cerebellum_suit	True	4	crossed	False	10	Tue Nov 23 07:48:57 2021
1124	s06	0.31319119778714793	0.6237708405794625	304	0.3569368648630298	0.4071141115557545	ridge_tessels0162_alpha_10	L2regression	glm7	sc1	sess	True	tessels0162	cerebellum_suit	True	4	crossed	False	10	Tue Nov 23 07:48:58 2021
1125	s22	0.3823272837601112	0.6539594918857938	304	0.4531261821070128	0.4543126485686184	ridge_tessels0162_alpha_10	L2regression	glm7	sc1	sess	True	tessels0162	cerebellum_suit	True	4	crossed	False	10	Tue Nov 23 07:48:59 2021
1126	s21	0.3723460823321039	0.42851897380231496	304	0.40643695129875496	0.01319278608226709	ridge_tessels0162_alpha_10	L2regression	glm7	sc1	sess	True	tessels0162	cerebellum_suit	True	4	crossed	False	10	Tue Nov 23 07:49:01 2021
1127	s08	0.143703519808669	0.9422517040943604	80	0.7081101980572208	0.07948149657756766	ridge_tessels0042_alpha_-2	L2regression	glm7	sc1	sess	True	tessels0042	cerebellum_suit	True	4	crossed	False	-2	Tue Nov 23 07:46:39 2021
1128	s26	0.10718816054668688	0.956275652118752	80	0.5114680891100071	0.25001645565967623	ridge_tessels0042_alpha_-2	L2regression	glm7	sc1	sess	True	tessels0042	cerebellum_suit	True	4	crossed	False	-2	Tue Nov 23 07:46:40 2021
1129	s04	0.08440158967035087	0.9715269454398546	80	0.4998354094784449	0.19085124749413235	ridge_tessels0042_alpha_-2	L2regression	glm7	sc1	sess	True	tessels0042	cerebellum_suit	True	4	crossed	False	-2	Tue Nov 23 07:46:41 2021
1130	s14	0.11206114034779842	0.9501087126886242	80	0.5188428624399656	0.16921711834425754	ridge_tessels0042_alpha_-2	L2regression	glm7	sc1	sess	True	tessels0042	cerebellum_suit	True	4	crossed	False	-2	Tue Nov 23 07:46:43 2021
1131	s06	0.08631703874096237	0.9692364518077744	80	0.4723091679856234	0.3300375829857878	ridge_tessels0042_alpha_-2	L2regression	glm7	sc1	sess	True	tessels0042	cerebellum_suit	True	4	crossed	False	-2	Tue Nov 23 07:46:44 2021
1132	s22	0.10553302687416637	0.9702400847339084	80	0.591293796271489	0.3792626286450896	ridge_tessels0042_alpha_-2	L2regression	glm7	sc1	sess	True	tessels0042	cerebellum_suit	True	4	crossed	False	-2	Tue Nov 23 07:46:46 2021
1133	s21	0.10112514456897437	0.965840313610492	80	0.6640682110798182	0.015478117648501837	ridge_tessels0042_alpha_-2	L2regression	glm7	sc1	sess	True	tessels0042	cerebellum_suit	True	4	crossed	False	-2	Tue Nov 23 07:46:48 2021
1134	s08	0.1946306602874317	0.8958061534401209	80	0.5901205709137656	0.10897109326390757	ridge_tessels0042_alpha_0	L2regression	glm7	sc1	sess	True	tessels0042	cerebellum_suit	True	4	crossed	False	0	Tue Nov 23 07:46:49 2021
1135	s26	0.14967873046341526	0.9155158105202492	80	0.4338689213821297	0.2813209271833135	ridge_tessels0042_alpha_0	L2regression	glm7	sc1	sess	True	tessels0042	cerebellum_suit	True	4	crossed	False	0	Tue Nov 23 07:46:50 2021
1136	s04	0.12106200521719128	0.9422578693886088	80	0.4402395385419531	0.20857029483582484	ridge_tessels0042_alpha_0	L2regression	glm7	sc1	sess	True	tessels0042	cerebellum_suit	True	4	crossed	False	0	Tue Nov 23 07:46:52 2021
1137	s14	0.15564250936373672	0.903873817858136	80	0.4474932900626373	0.2144081236467815	ridge_tessels0042_alpha_0	L2regression	glm7	sc1	sess	True	tessels0042	cerebellum_suit	True	4	crossed	False	0	Tue Nov 23 07:46:53 2021
1138	s06	0.12201550402368642	0.9386627018808802	80	0.4019924214924582	0.3835653452645896	ridge_tessels0042_alpha_0	L2regression	glm7	sc1	sess	True	tessels0042	cerebellum_suit	True	4	crossed	False	0	Tue Nov 23 07:46:54 2021
1139	s22	0.1462393800722898	0.9432087965972692	80	0.4968218814690121	0.4309216355650082	ridge_tessels0042_alpha_0	L2regression	glm7	sc1	sess	True	tessels0042	cerebellum_suit	True	4	crossed	False	0	Tue Nov 23 07:46:55 2021
1140	s21	0.142689892589979	0.9336134788171596	80	0.5652760743668215	0.02153021553774472	ridge_tessels0042_alpha_0	L2regression	glm7	sc1	sess	True	tessels0042	cerebellum_suit	True	4	crossed	False	0	Tue Nov 23 07:46:57 2021
1141	s08	0.2646798368267089	0.801456296923185	80	0.5120112588425255	0.1405575869950193	ridge_tessels0042_alpha_2	L2regression	glm7	sc1	sess	True	tessels0042	cerebellum_suit	True	4	crossed	False	2	Tue Nov 23 07:46:58 2021
1142	s26	0.20728500891124232	0.8316394336597541	80	0.4017327111165104	0.27876378596816426	ridge_tessels0042_alpha_2	L2regression	glm7	sc1	sess	True	tessels0042	cerebellum_suit	True	4	crossed	False	2	Tue Nov 23 07:46:59 2021
1143	s04	0.17946788606864753	0.8701389128652939	80	0.4077323431194028	0.2153375304424689	ridge_tessels0042_alpha_2	L2regression	glm7	sc1	sess	True	tessels0042	cerebellum_suit	True	4	crossed	False	2	Tue Nov 23 07:47:00 2021
1144	s14	0.20762461827644324	0.8238871054520255	80	0.4032557677915527	0.2494203561658185	ridge_tessels0042_alpha_2	L2regression	glm7	sc1	sess	True	tessels0042	cerebellum_suit	True	4	crossed	False	2	Tue Nov 23 07:47:02 2021
1145	s06	0.16968608553289274	0.8782968529738391	80	0.3686135123094866	0.4091919847763144	ridge_tessels0042_alpha_2	L2regression	glm7	sc1	sess	True	tessels0042	cerebellum_suit	True	4	crossed	False	2	Tue Nov 23 07:47:03 2021
1146	s22	0.20195337546976933	0.8900332465930122	80	0.4515110498602906	0.4630160983654633	ridge_tessels0042_alpha_2	L2regression	glm7	sc1	sess	True	tessels0042	cerebellum_suit	True	4	crossed	False	2	Tue Nov 23 07:47:04 2021
1147	s21	0.20666535175511228	0.8595115757104271	80	0.4980039506248705	0.03437723324850376	ridge_tessels0042_alpha_2	L2regression	glm7	sc1	sess	True	tessels0042	cerebellum_suit	True	4	crossed	False	2	Tue Nov 23 07:47:06 2021
1148	s08	0.33154195421180804	0.6587792371472163	80	0.4599064667333077	0.17761720968191325	ridge_tessels0042_alpha_4	L2regression	glm7	sc1	sess	True	tessels0042	cerebellum_suit	True	4	crossed	False	4	Tue Nov 23 07:47:07 2021
1149	s26	0.2618817102234318	0.7115624455519722	80	0.3775461190042551	0.2801355014621235	ridge_tessels0042_alpha_4	L2regression	glm7	sc1	sess	True	tessels0042	cerebellum_suit	True	4	crossed	False	4	Tue Nov 23 07:47:08 2021
1150	s04	0.2444885719513744	0.7350873804170859	80	0.3760189140767114	0.2359012153460655	ridge_tessels0042_alpha_4	L2regression	glm7	sc1	sess	True	tessels0042	cerebellum_suit	True	4	crossed	False	4	Tue Nov 23 07:47:10 2021
1151	s14	0.2593348763836182	0.7060972338531744	80	0.3709408355590499	0.2837923634566344	ridge_tessels0042_alpha_4	L2regression	glm7	sc1	sess	True	tessels0042	cerebellum_suit	True	4	crossed	False	4	Tue Nov 23 07:47:11 2021
1152	s06	0.2202105950870052	0.7824093828344729	80	0.34555931282788793	0.4208808844320028	ridge_tessels0042_alpha_4	L2regression	glm7	sc1	sess	True	tessels0042	cerebellum_suit	True	4	crossed	False	4	Tue Nov 23 07:47:12 2021
1153	s22	0.2634147713489399	0.8047154719769434	80	0.4222107683852699	0.4845677901736752	ridge_tessels0042_alpha_4	L2regression	glm7	sc1	sess	True	tessels0042	cerebellum_suit	True	4	crossed	False	4	Tue Nov 23 07:47:14 2021
1154	s21	0.2781058617850043	0.7296043397915628	80	0.4430758485066675	0.054280937452311086	ridge_tessels0042_alpha_4	L2regression	glm7	sc1	sess	True	tessels0042	cerebellum_suit	True	4	crossed	False	4	Tue Nov 23 07:47:15 2021
1155	s08	0.3795829593997923	0.5141809624545479	80	0.4410737311898561	0.178878531193622	ridge_tessels0042_alpha_6	L2regression	glm7	sc1	sess	True	tessels0042	cerebellum_suit	True	4	crossed	False	6	Tue Nov 23 07:47:16 2021
1156	s26	0.3070896487486472	0.5897282407823607	80	0.3675677244638256	0.2696932978960186	ridge_tessels0042_alpha_6	L2regression	glm7	sc1	sess	True	tessels0042	cerebellum_suit	True	4	crossed	False	6	Tue Nov 23 07:47:18 2021
1157	s04	0.2926050932837669	0.5719915473496237	80	0.3627940729565911	0.2363154609320385	ridge_tessels0042_alpha_6	L2regression	glm7	sc1	sess	True	tessels0042	cerebellum_suit	True	4	crossed	False	6	Tue Nov 23 07:47:19 2021
1158	s14	0.3014805795325925	0.5725555530840335	80	0.35755753518608874	0.30470983358332954	ridge_tessels0042_alpha_6	L2regression	glm7	sc1	sess	True	tessels0042	cerebellum_suit	True	4	crossed	False	6	Tue Nov 23 07:47:20 2021
1159	s06	0.2642629988606449	0.6815931276798866	80	0.3345862273042547	0.4174465330176888	ridge_tessels0042_alpha_6	L2regression	glm7	sc1	sess	True	tessels0042	cerebellum_suit	True	4	crossed	False	6	Tue Nov 23 07:47:22 2021
1160	s22	0.3202020257119486	0.7095543510023861	80	0.4132912731912717	0.4831912871119662	ridge_tessels0042_alpha_6	L2regression	glm7	sc1	sess	True	tessels0042	cerebellum_suit	True	4	crossed	False	6	Tue Nov 23 07:47:23 2021
1161	s21	0.3356314053476937	0.5753694823043813	80	0.413373877204022	0.047526971970335695	ridge_tessels0042_alpha_6	L2regression	glm7	sc1	sess	True	tessels0042	cerebellum_suit	True	4	crossed	False	6	Tue Nov 23 07:47:24 2021
1162	s08	0.4085369660874422	0.3540288940428149	80	0.4409452816069376	0.13002879648640062	ridge_tessels0042_alpha_8	L2regression	glm7	sc1	sess	True	tessels0042	cerebellum_suit	True	4	crossed	False	8	Tue Nov 23 07:47:26 2021
1163	s26	0.3402725439159961	0.4459240995798573	80	0.3743989899855192	0.22666388608141386	ridge_tessels0042_alpha_8	L2regression	glm7	sc1	sess	True	tessels0042	cerebellum_suit	True	4	crossed	False	8	Tue Nov 23 07:47:27 2021
1164	s04	0.32019433177536444	0.4019342300301812	80	0.3665926498368599	0.19252358061364427	ridge_tessels0042_alpha_8	L2regression	glm7	sc1	sess	True	tessels0042	cerebellum_suit	True	4	crossed	False	8	Tue Nov 23 07:47:28 2021
1165	s14	0.3307938258318681	0.4212680395350705	80	0.3635015133176984	0.2723294627766643	ridge_tessels0042_alpha_8	L2regression	glm7	sc1	sess	True	tessels0042	cerebellum_suit	True	4	crossed	False	8	Tue Nov 23 07:47:29 2021
1166	s06	0.3046423797170281	0.60071568998328	80	0.3514737416630583	0.3810600145667435	ridge_tessels0042_alpha_8	L2regression	glm7	sc1	sess	True	tessels0042	cerebellum_suit	True	4	crossed	False	8	Tue Nov 23 07:47:31 2021
1167	s22	0.3716950252457424	0.6298583341583206	80	0.443350497128872	0.4426318456090736	ridge_tessels0042_alpha_8	L2regression	glm7	sc1	sess	True	tessels0042	cerebellum_suit	True	4	crossed	False	8	Tue Nov 23 07:47:32 2021
1168	s21	0.3683115024971846	0.4026145488872594	80	0.40774106026552304	0.0038409911197590063	ridge_tessels0042_alpha_8	L2regression	glm7	sc1	sess	True	tessels0042	cerebellum_suit	True	4	crossed	False	8	Tue Nov 23 07:47:34 2021
1169	s08	0.4188867739645189	0.2686649754739384	80	0.441273831841364	0.10146507066428584	ridge_tessels0042_alpha_10	L2regression	glm7	sc1	sess	True	tessels0042	cerebellum_suit	True	4	crossed	False	10	Tue Nov 23 07:47:35 2021
1170	s26	0.3532305568489479	0.3605402625482241	80	0.3798668750670888	0.20020326658871693	ridge_tessels0042_alpha_10	L2regression	glm7	sc1	sess	True	tessels0042	cerebellum_suit	True	4	crossed	False	10	Tue Nov 23 07:47:36 2021
1171	s04	0.3314590352240032	0.3252778803992145	80	0.3709713365115256	0.16758591015289656	ridge_tessels0042_alpha_10	L2regression	glm7	sc1	sess	True	tessels0042	cerebellum_suit	True	4	crossed	False	10	Tue Nov 23 07:47:38 2021
1172	s14	0.3456137576382229	0.35758517823187025	80	0.3716073594046647	0.2538173918300919	ridge_tessels0042_alpha_10	L2regression	glm7	sc1	sess	True	tessels0042	cerebellum_suit	True	4	crossed	False	10	Tue Nov 23 07:47:39 2021
1173	s06	0.32418318511154104	0.5619272235432861	80	0.3640194970073644	0.3573617292220576	ridge_tessels0042_alpha_10	L2regression	glm7	sc1	sess	True	tessels0042	cerebellum_suit	True	4	crossed	False	10	Tue Nov 23 07:47:40 2021
1174	s22	0.3954348977018381	0.5820714791892744	80	0.4626738146624511	0.40996458095177496	ridge_tessels0042_alpha_10	L2regression	glm7	sc1	sess	True	tessels0042	cerebellum_suit	True	4	crossed	False	10	Tue Nov 23 07:47:41 2021
1175	s21	0.3786327124882032	0.31091608761318834	80	0.4063047759097561	-0.01289830576491238	ridge_tessels0042_alpha_10	L2regression	glm7	sc1	sess	True	tessels0042	cerebellum_suit	True	4	crossed	False	10	Tue Nov 23 07:47:43 2021
1176	s08	0.003646006385729172	0.9999714265670574	400	0.5807911479834826	0.11697628843203504	ridge_mdtb1002_200_alpha_-2	L2regression	glm7	sc1	sess	True	mdtb1002_200	cerebellum_suit	True	4	crossed	False	-2	Tue Nov 23 07:45:20 2021
1177	s26	0.0024014504162619553	0.9999828951301832	400	0.4609329352238967	0.2318993938278501	ridge_mdtb1002_200_alpha_-2	L2regression	glm7	sc1	sess	True	mdtb1002_200	cerebellum_suit	True	4	crossed	False	-2	Tue Nov 23 07:45:22 2021
1178	s04	0.002138413701640844	0.9999844582148468	400	0.4378046217224551	0.22295210588036785	ridge_mdtb1002_200_alpha_-2	L2regression	glm7	sc1	sess	True	mdtb1002_200	cerebellum_suit	True	4	crossed	False	-2	Tue Nov 23 07:45:23 2021
1179	s14	0.003671496269048409	0.9999558425962156	400	0.4729884086923842	0.21355401764358828	ridge_mdtb1002_200_alpha_-2	L2regression	glm7	sc1	sess	True	mdtb1002_200	cerebellum_suit	True	4	crossed	False	-2	Tue Nov 23 07:45:24 2021
1180	s06	0.0019021160191152106	0.9999872415773184	400	0.4051148140944649	0.3778269379858927	ridge_mdtb1002_200_alpha_-2	L2regression	glm7	sc1	sess	True	mdtb1002_200	cerebellum_suit	True	4	crossed	False	-2	Tue Nov 23 07:45:26 2021
1181	s22	0.001974360065228648	0.9999912486173724	400	0.5167400544284568	0.3713790322386403	ridge_mdtb1002_200_alpha_-2	L2regression	glm7	sc1	sess	True	mdtb1002_200	cerebellum_suit	True	4	crossed	False	-2	Tue Nov 23 07:45:27 2021
1182	s21	0.002515822070008976	0.9999823278808446	400	0.5538755114496325	0.047871009454872174	ridge_mdtb1002_200_alpha_-2	L2regression	glm7	sc1	sess	True	mdtb1002_200	cerebellum_suit	True	4	crossed	False	-2	Tue Nov 23 07:45:29 2021
1183	s08	0.02297765032389822	0.9988559921149132	400	0.57203374418841	0.1196237480627276	ridge_mdtb1002_200_alpha_0	L2regression	glm7	sc1	sess	True	mdtb1002_200	cerebellum_suit	True	4	crossed	False	0	Tue Nov 23 07:45:30 2021
1184	s26	0.01562622470075396	0.9992697112828142	400	0.4550397190190954	0.2354748040491093	ridge_mdtb1002_200_alpha_0	L2regression	glm7	sc1	sess	True	mdtb1002_200	cerebellum_suit	True	4	crossed	False	0	Tue Nov 23 07:45:31 2021
1185	s04	0.013702527687438041	0.9993592003722638	400	0.431805247912572	0.2281300613597713	ridge_mdtb1002_200_alpha_0	L2regression	glm7	sc1	sess	True	mdtb1002_200	cerebellum_suit	True	4	crossed	False	0	Tue Nov 23 07:45:33 2021
1186	s14	0.0220774907552069	0.9983874866001003	400	0.4616567094635019	0.21798497294617056	ridge_mdtb1002_200_alpha_0	L2regression	glm7	sc1	sess	True	mdtb1002_200	cerebellum_suit	True	4	crossed	False	0	Tue Nov 23 07:45:34 2021
1187	s06	0.012319185220419571	0.9994623166227394	400	0.3997634706919231	0.3837624891875045	ridge_mdtb1002_200_alpha_0	L2regression	glm7	sc1	sess	True	mdtb1002_200	cerebellum_suit	True	4	crossed	False	0	Tue Nov 23 07:45:35 2021
1188	s22	0.013148681946778384	0.9996093057303068	400	0.5106351440729551	0.3776011718481273	ridge_mdtb1002_200_alpha_0	L2regression	glm7	sc1	sess	True	mdtb1002_200	cerebellum_suit	True	4	crossed	False	0	Tue Nov 23 07:45:37 2021
1189	s21	0.016032309852876153	0.9992801598706816	400	0.5450559716459793	0.04775495874065852	ridge_mdtb1002_200_alpha_0	L2regression	glm7	sc1	sess	True	mdtb1002_200	cerebellum_suit	True	4	crossed	False	0	Tue Nov 23 07:45:38 2021
1190	s08	0.0903813665595041	0.9819655276941618	400	0.5397510762329188	0.13159032297666184	ridge_mdtb1002_200_alpha_2	L2regression	glm7	sc1	sess	True	mdtb1002_200	cerebellum_suit	True	4	crossed	False	2	Tue Nov 23 07:45:40 2021
1191	s26	0.0668869938362482	0.9861420830276999	400	0.4327796230853311	0.2502062283004833	ridge_mdtb1002_200_alpha_2	L2regression	glm7	sc1	sess	True	mdtb1002_200	cerebellum_suit	True	4	crossed	False	2	Tue Nov 23 07:45:41 2021
1192	s04	0.05578130373644437	0.9893231049816908	400	0.4120603165055177	0.24562000960787245	ridge_mdtb1002_200_alpha_2	L2regression	glm7	sc1	sess	True	mdtb1002_200	cerebellum_suit	True	4	crossed	False	2	Tue Nov 23 07:45:42 2021
1193	s14	0.07796683781562645	0.9794286929542958	400	0.4309674761599836	0.23024300795189856	ridge_mdtb1002_200_alpha_2	L2regression	glm7	sc1	sess	True	mdtb1002_200	cerebellum_suit	True	4	crossed	False	2	Tue Nov 23 07:45:44 2021
1194	s06	0.05177319920241686	0.9903468103761596	400	0.38046403698353976	0.4052831187694504	ridge_mdtb1002_200_alpha_2	L2regression	glm7	sc1	sess	True	mdtb1002_200	cerebellum_suit	True	4	crossed	False	2	Tue Nov 23 07:45:45 2021
1195	s22	0.05972830199016064	0.9917430757083536	400	0.4858734825280944	0.4039798370147928	ridge_mdtb1002_200_alpha_2	L2regression	glm7	sc1	sess	True	mdtb1002_200	cerebellum_suit	True	4	crossed	False	2	Tue Nov 23 07:45:47 2021
1196	s21	0.06473987728423658	0.9882225657931324	400	0.5153344814194273	0.04726761481244982	ridge_mdtb1002_200_alpha_2	L2regression	glm7	sc1	sess	True	mdtb1002_200	cerebellum_suit	True	4	crossed	False	2	Tue Nov 23 07:45:48 2021
1197	s08	0.20039803793693084	0.9080817349326792	400	0.4899045669655962	0.15490693763148566	ridge_mdtb1002_200_alpha_4	L2regression	glm7	sc1	sess	True	mdtb1002_200	cerebellum_suit	True	4	crossed	False	4	Tue Nov 23 07:45:49 2021
1198	s26	0.15464823782246748	0.9206173280096962	400	0.3990376811718179	0.2713187147087369	ridge_mdtb1002_200_alpha_4	L2regression	glm7	sc1	sess	True	mdtb1002_200	cerebellum_suit	True	4	crossed	False	4	Tue Nov 23 07:45:51 2021
1199	s04	0.12857221936271912	0.9439097119689186	400	0.38696492188103215	0.26695774213655965	ridge_mdtb1002_200_alpha_4	L2regression	glm7	sc1	sess	True	mdtb1002_200	cerebellum_suit	True	4	crossed	False	4	Tue Nov 23 07:45:52 2021
1200	s14	0.15904050642465425	0.9122762856777716	400	0.3990352830618705	0.24362554027897226	ridge_mdtb1002_200_alpha_4	L2regression	glm7	sc1	sess	True	mdtb1002_200	cerebellum_suit	True	4	crossed	False	4	Tue Nov 23 07:45:53 2021
1201	s06	0.11954039606707274	0.947461914217246	400	0.3548222661060061	0.4292143293854126	ridge_mdtb1002_200_alpha_4	L2regression	glm7	sc1	sess	True	mdtb1002_200	cerebellum_suit	True	4	crossed	False	4	Tue Nov 23 07:45:55 2021
1202	s22	0.14563681147496133	0.9496027961419108	400	0.4488656711881016	0.4409647420837644	ridge_mdtb1002_200_alpha_4	L2regression	glm7	sc1	sess	True	mdtb1002_200	cerebellum_suit	True	4	crossed	False	4	Tue Nov 23 07:45:56 2021
1203	s21	0.147786791756248	0.9403901591985356	400	0.4746265787145526	0.04787983590851095	ridge_mdtb1002_200_alpha_4	L2regression	glm7	sc1	sess	True	mdtb1002_200	cerebellum_suit	True	4	crossed	False	4	Tue Nov 23 07:45:57 2021
1204	s08	0.3101590257418607	0.7458522877835516	400	0.4511755164039457	0.17561909974321352	ridge_mdtb1002_200_alpha_6	L2regression	glm7	sc1	sess	True	mdtb1002_200	cerebellum_suit	True	4	crossed	False	6	Tue Nov 23 07:45:59 2021
1205	s26	0.2419350612327721	0.7904380376171367	400	0.3746794616560433	0.2680150008445171	ridge_mdtb1002_200_alpha_6	L2regression	glm7	sc1	sess	True	mdtb1002_200	cerebellum_suit	True	4	crossed	False	6	Tue Nov 23 07:46:00 2021
1206	s04	0.21878358816289514	0.8246252021527242	400	0.36347923185941855	0.2826330607100955	ridge_mdtb1002_200_alpha_6	L2regression	glm7	sc1	sess	True	mdtb1002_200	cerebellum_suit	True	4	crossed	False	6	Tue Nov 23 07:46:02 2021
1207	s14	0.2435156412015941	0.7737321128272145	400	0.3685868098781785	0.2739714634574553	ridge_mdtb1002_200_alpha_6	L2regression	glm7	sc1	sess	True	mdtb1002_200	cerebellum_suit	True	4	crossed	False	6	Tue Nov 23 07:46:03 2021
1208	s06	0.1985257622047052	0.8477718142507128	400	0.3363121843917622	0.4323265043075117	ridge_mdtb1002_200_alpha_6	L2regression	glm7	sc1	sess	True	mdtb1002_200	cerebellum_suit	True	4	crossed	False	6	Tue Nov 23 07:46:04 2021
1209	s22	0.2434039507648373	0.8540245498296294	400	0.4191745443410527	0.4639119287568732	ridge_mdtb1002_200_alpha_6	L2regression	glm7	sc1	sess	True	mdtb1002_200	cerebellum_suit	True	4	crossed	False	6	Tue Nov 23 07:46:06 2021
1210	s21	0.2514173034576032	0.8288567629429059	400	0.43213854858254	0.044936678764508665	ridge_mdtb1002_200_alpha_6	L2regression	glm7	sc1	sess	True	mdtb1002_200	cerebellum_suit	True	4	crossed	False	6	Tue Nov 23 07:46:07 2021
1211	s08	0.3793889036228976	0.5479290468657332	400	0.4399848106468188	0.1631846290425644	ridge_mdtb1002_200_alpha_8	L2regression	glm7	sc1	sess	True	mdtb1002_200	cerebellum_suit	True	4	crossed	False	8	Tue Nov 23 07:46:08 2021
1212	s26	0.30910756163187864	0.6204438238705434	400	0.3704177788182356	0.2397367412779981	ridge_mdtb1002_200_alpha_8	L2regression	glm7	sc1	sess	True	mdtb1002_200	cerebellum_suit	True	4	crossed	False	8	Tue Nov 23 07:46:10 2021
1213	s04	0.2890135019823391	0.6354793370801318	400	0.3606752139287264	0.25010712549551417	ridge_mdtb1002_200_alpha_8	L2regression	glm7	sc1	sess	True	mdtb1002_200	cerebellum_suit	True	4	crossed	False	8	Tue Nov 23 07:46:11 2021
1214	s14	0.3045236741149196	0.5780721871749125	400	0.3593701523508074	0.2878956519287905	ridge_mdtb1002_200_alpha_8	L2regression	glm7	sc1	sess	True	mdtb1002_200	cerebellum_suit	True	4	crossed	False	8	Tue Nov 23 07:46:12 2021
1215	s06	0.2675997886926902	0.7058033047909352	400	0.3380779303111905	0.4047427441681869	ridge_mdtb1002_200_alpha_8	L2regression	glm7	sc1	sess	True	mdtb1002_200	cerebellum_suit	True	4	crossed	False	8	Tue Nov 23 07:46:14 2021
1216	s22	0.3295776742219061	0.7386713942060373	400	0.4300611282697504	0.4357999134365736	ridge_mdtb1002_200_alpha_8	L2regression	glm7	sc1	sess	True	mdtb1002_200	cerebellum_suit	True	4	crossed	False	8	Tue Nov 23 07:46:15 2021
1217	s21	0.3357127994949404	0.6392379867568128	400	0.4115574647405487	0.023991327530202163	ridge_mdtb1002_200_alpha_8	L2regression	glm7	sc1	sess	True	mdtb1002_200	cerebellum_suit	True	4	crossed	False	8	Tue Nov 23 07:46:16 2021
1218	s08	0.4103935350961271	0.3825805602243621	400	0.4407632909125473	0.11606591850017008	ridge_mdtb1002_200_alpha_10	L2regression	glm7	sc1	sess	True	mdtb1002_200	cerebellum_suit	True	4	crossed	False	10	Tue Nov 23 07:46:18 2021
1219	s26	0.34364523223611393	0.4438761331232349	400	0.3766832562906707	0.2030787625326848	ridge_mdtb1002_200_alpha_10	L2regression	glm7	sc1	sess	True	mdtb1002_200	cerebellum_suit	True	4	crossed	False	10	Tue Nov 23 07:46:19 2021
1220	s04	0.3220829415181891	0.43639774239036977	400	0.367623388125874	0.19156197034485686	ridge_mdtb1002_200_alpha_10	L2regression	glm7	sc1	sess	True	mdtb1002_200	cerebellum_suit	True	4	crossed	False	10	Tue Nov 23 07:46:21 2021
1221	s14	0.3347513378120361	0.4130654360249011	400	0.3662077790782426	0.25886005349508584	ridge_mdtb1002_200_alpha_10	L2regression	glm7	sc1	sess	True	mdtb1002_200	cerebellum_suit	True	4	crossed	False	10	Tue Nov 23 07:46:22 2021
1222	s06	0.3108132766328419	0.5776420858133495	400	0.3566148561153232	0.3503944770530289	ridge_mdtb1002_200_alpha_10	L2regression	glm7	sc1	sess	True	mdtb1002_200	cerebellum_suit	True	4	crossed	False	10	Tue Nov 23 07:46:23 2021
1223	s22	0.382539142263186	0.6083718861308963	400	0.457367678049401	0.3353539194351139	ridge_mdtb1002_200_alpha_10	L2regression	glm7	sc1	sess	True	mdtb1002_200	cerebellum_suit	True	4	crossed	False	10	Tue Nov 23 07:46:25 2021
1224	s21	0.3706110247407086	0.42655608779757626	400	0.4071222758858551	-0.0025809357897291357	ridge_mdtb1002_200_alpha_10	L2regression	glm7	sc1	sess	True	mdtb1002_200	cerebellum_suit	True	4	crossed	False	10	Tue Nov 23 07:46:26 2021
1225	s08	0.006523882332788261	0.9999055256673424	300	0.6015292645477414	0.1130304366652658	ridge_mdtb1002_150_alpha_-2	L2regression	glm7	sc1	sess	True	mdtb1002_150	cerebellum_suit	True	4	crossed	False	-2	Tue Nov 23 07:44:03 2021
1226	s26	0.003952472590558861	0.9999523566947104	300	0.4751313007196937	0.2229832491356073	ridge_mdtb1002_150_alpha_-2	L2regression	glm7	sc1	sess	True	mdtb1002_150	cerebellum_suit	True	4	crossed	False	-2	Tue Nov 23 07:44:04 2021
1227	s04	0.003728948100496944	0.9999515628577096	300	0.4543265485923079	0.1955110711357576	ridge_mdtb1002_150_alpha_-2	L2regression	glm7	sc1	sess	True	mdtb1002_150	cerebellum_suit	True	4	crossed	False	-2	Tue Nov 23 07:44:06 2021
1228	s14	0.006329607564957375	0.9998652435369376	300	0.4743756276290509	0.22133667824627085	ridge_mdtb1002_150_alpha_-2	L2regression	glm7	sc1	sess	True	mdtb1002_150	cerebellum_suit	True	4	crossed	False	-2	Tue Nov 23 07:44:07 2021
1229	s06	0.0032017371098668856	0.9999631040702384	300	0.4210767974994651	0.3617312063814392	ridge_mdtb1002_150_alpha_-2	L2regression	glm7	sc1	sess	True	mdtb1002_150	cerebellum_suit	True	4	crossed	False	-2	Tue Nov 23 07:44:09 2021
1230	s22	0.0033284678331766014	0.9999747138098879	300	0.531008697285373	0.3529928848894109	ridge_mdtb1002_150_alpha_-2	L2regression	glm7	sc1	sess	True	mdtb1002_150	cerebellum_suit	True	4	crossed	False	-2	Tue Nov 23 07:44:10 2021
1231	s21	0.004249262557058687	0.999947981552792	300	0.5708184028263861	0.043550944813716484	ridge_mdtb1002_150_alpha_-2	L2regression	glm7	sc1	sess	True	mdtb1002_150	cerebellum_suit	True	4	crossed	False	-2	Tue Nov 23 07:44:12 2021
1232	s08	0.03655438757298917	0.9970083297078958	300	0.5850045481405179	0.11939980170050984	ridge_mdtb1002_150_alpha_0	L2regression	glm7	sc1	sess	True	mdtb1002_150	cerebellum_suit	True	4	crossed	False	0	Tue Nov 23 07:44:14 2021
1233	s26	0.023787148407913485	0.9982548792188396	300	0.4644074671281956	0.22947238484148474	ridge_mdtb1002_150_alpha_0	L2regression	glm7	sc1	sess	True	mdtb1002_150	cerebellum_suit	True	4	crossed	False	0	Tue Nov 23 07:44:15 2021
1234	s04	0.021581406848141384	0.9983710398056986	300	0.4426670809169797	0.2053091739691813	ridge_mdtb1002_150_alpha_0	L2regression	glm7	sc1	sess	True	mdtb1002_150	cerebellum_suit	True	4	crossed	False	0	Tue Nov 23 07:44:17 2021
1235	s14	0.03305143051657106	0.996300626482362	300	0.4577606301124688	0.2275569869990751	ridge_mdtb1002_150_alpha_0	L2regression	glm7	sc1	sess	True	mdtb1002_150	cerebellum_suit	True	4	crossed	False	0	Tue Nov 23 07:44:18 2021
1236	s06	0.019028045853011696	0.9986904578988056	300	0.41119407375251626	0.3712258255311933	ridge_mdtb1002_150_alpha_0	L2regression	glm7	sc1	sess	True	mdtb1002_150	cerebellum_suit	True	4	crossed	False	0	Tue Nov 23 07:44:19 2021
1237	s22	0.02048465845414744	0.9990357830619389	300	0.5201542044241106	0.3633082250010107	ridge_mdtb1002_150_alpha_0	L2regression	glm7	sc1	sess	True	mdtb1002_150	cerebellum_suit	True	4	crossed	False	0	Tue Nov 23 07:44:21 2021
1238	s21	0.02460942299023922	0.9982549549105392	300	0.5544970206633264	0.04603257867337753	ridge_mdtb1002_150_alpha_0	L2regression	glm7	sc1	sess	True	mdtb1002_150	cerebellum_suit	True	4	crossed	False	0	Tue Nov 23 07:44:22 2021
1239	s08	0.11611676249491122	0.9694242723741759	300	0.5386546354063941	0.13941106201401665	ridge_mdtb1002_150_alpha_2	L2regression	glm7	sc1	sess	True	mdtb1002_150	cerebellum_suit	True	4	crossed	False	2	Tue Nov 23 07:44:24 2021
1240	s26	0.08500085519963999	0.9769059348673018	300	0.4320712008096407	0.25181396721096777	ridge_mdtb1002_150_alpha_2	L2regression	glm7	sc1	sess	True	mdtb1002_150	cerebellum_suit	True	4	crossed	False	2	Tue Nov 23 07:44:25 2021
1241	s04	0.07211210232886267	0.9817518338609488	300	0.414425425493188	0.2318044182667537	ridge_mdtb1002_150_alpha_2	L2regression	glm7	sc1	sess	True	mdtb1002_150	cerebellum_suit	True	4	crossed	False	2	Tue Nov 23 07:44:26 2021
1242	s14	0.09553341872929176	0.9685959540469408	300	0.4245351070461936	0.2395151841727068	ridge_mdtb1002_150_alpha_2	L2regression	glm7	sc1	sess	True	mdtb1002_150	cerebellum_suit	True	4	crossed	False	2	Tue Nov 23 07:44:28 2021
1243	s06	0.06620354325500738	0.9839226045920048	300	0.3835085229901114	0.39847069013921305	ridge_mdtb1002_150_alpha_2	L2regression	glm7	sc1	sess	True	mdtb1002_150	cerebellum_suit	True	4	crossed	False	2	Tue Nov 23 07:44:29 2021
1244	s22	0.07677249282714033	0.9861915370137098	300	0.4859916151513757	0.3984336309867976	ridge_mdtb1002_150_alpha_2	L2regression	glm7	sc1	sess	True	mdtb1002_150	cerebellum_suit	True	4	crossed	False	2	Tue Nov 23 07:44:31 2021
1245	s21	0.08220947826347733	0.9807139212153188	300	0.5122231521941417	0.05118607090033415	ridge_mdtb1002_150_alpha_2	L2regression	glm7	sc1	sess	True	mdtb1002_150	cerebellum_suit	True	4	crossed	False	2	Tue Nov 23 07:44:32 2021
1246	s08	0.22685833143476986	0.8775479483229437	300	0.4830221412875435	0.16508659425777938	ridge_mdtb1002_150_alpha_4	L2regression	glm7	sc1	sess	True	mdtb1002_150	cerebellum_suit	True	4	crossed	False	4	Tue Nov 23 07:44:33 2021
1247	s26	0.1726989656488346	0.8982485514876037	300	0.3943331741561941	0.2750191735817921	ridge_mdtb1002_150_alpha_4	L2regression	glm7	sc1	sess	True	mdtb1002_150	cerebellum_suit	True	4	crossed	False	4	Tue Nov 23 07:44:34 2021
1248	s04	0.14832954692589115	0.9229632820680554	300	0.3854723022979807	0.2594414757130872	ridge_mdtb1002_150_alpha_4	L2regression	glm7	sc1	sess	True	mdtb1002_150	cerebellum_suit	True	4	crossed	False	4	Tue Nov 23 07:44:36 2021
1249	s14	0.17686289293607446	0.8886914013349774	300	0.3919991055320772	0.2543894747973107	ridge_mdtb1002_150_alpha_4	L2regression	glm7	sc1	sess	True	mdtb1002_150	cerebellum_suit	True	4	crossed	False	4	Tue Nov 23 07:44:37 2021
1250	s06	0.13540312964417	0.9313162046471256	300	0.3540517247671943	0.4240647210493692	ridge_mdtb1002_150_alpha_4	L2regression	glm7	sc1	sess	True	mdtb1002_150	cerebellum_suit	True	4	crossed	False	4	Tue Nov 23 07:44:38 2021
1251	s22	0.16489784352253212	0.9348163343690541	300	0.4450801199014653	0.4398066136150493	ridge_mdtb1002_150_alpha_4	L2regression	glm7	sc1	sess	True	mdtb1002_150	cerebellum_suit	True	4	crossed	False	4	Tue Nov 23 07:44:39 2021
1252	s21	0.1686713576383278	0.9215867963893704	300	0.4655352946943957	0.05248580790240505	ridge_mdtb1002_150_alpha_4	L2regression	glm7	sc1	sess	True	mdtb1002_150	cerebellum_suit	True	4	crossed	False	4	Tue Nov 23 07:44:41 2021
1253	s08	0.32749405808656523	0.7026118387753318	300	0.4469845741935041	0.17958340617049373	ridge_mdtb1002_150_alpha_6	L2regression	glm7	sc1	sess	True	mdtb1002_150	cerebellum_suit	True	4	crossed	False	6	Tue Nov 23 07:44:42 2021
1254	s26	0.255254192475816	0.7613684635055809	300	0.3722975317781084	0.2676348030960552	ridge_mdtb1002_150_alpha_6	L2regression	glm7	sc1	sess	True	mdtb1002_150	cerebellum_suit	True	4	crossed	False	6	Tue Nov 23 07:44:43 2021
1255	s04	0.2355882119492963	0.7865668208093232	300	0.362781977535076	0.2738749805463779	ridge_mdtb1002_150_alpha_6	L2regression	glm7	sc1	sess	True	mdtb1002_150	cerebellum_suit	True	4	crossed	False	6	Tue Nov 23 07:44:45 2021
1256	s14	0.2563888965626507	0.740846444354881	300	0.364202778411045	0.2863213692008741	ridge_mdtb1002_150_alpha_6	L2regression	glm7	sc1	sess	True	mdtb1002_150	cerebellum_suit	True	4	crossed	False	6	Tue Nov 23 07:44:46 2021
1257	s06	0.2121953807430605	0.8228597767396426	300	0.3356118700096252	0.4258082837834237	ridge_mdtb1002_150_alpha_6	L2regression	glm7	sc1	sess	True	mdtb1002_150	cerebellum_suit	True	4	crossed	False	6	Tue Nov 23 07:44:47 2021
1258	s22	0.2608316512872761	0.8303778159237349	300	0.4179183086772759	0.4635778057671267	ridge_mdtb1002_150_alpha_6	L2regression	glm7	sc1	sess	True	mdtb1002_150	cerebellum_suit	True	4	crossed	False	6	Tue Nov 23 07:44:49 2021
1259	s21	0.270594216101326	0.7957943246452441	300	0.4256664090332618	0.04630141184143032	ridge_mdtb1002_150_alpha_6	L2regression	glm7	sc1	sess	True	mdtb1002_150	cerebellum_suit	True	4	crossed	False	6	Tue Nov 23 07:44:50 2021
1260	s08	0.3873145819699557	0.50793407747852	300	0.4396474463559277	0.15679281704198	ridge_mdtb1002_150_alpha_8	L2regression	glm7	sc1	sess	True	mdtb1002_150	cerebellum_suit	True	4	crossed	False	8	Tue Nov 23 07:44:51 2021
1261	s26	0.3167548783150088	0.5872708823950469	300	0.3709937800948808	0.23564238560373685	ridge_mdtb1002_150_alpha_8	L2regression	glm7	sc1	sess	True	mdtb1002_150	cerebellum_suit	True	4	crossed	False	8	Tue Nov 23 07:44:53 2021
1262	s04	0.2976450988034364	0.5856332898419921	300	0.3622122245642123	0.23483621555773296	ridge_mdtb1002_150_alpha_8	L2regression	glm7	sc1	sess	True	mdtb1002_150	cerebellum_suit	True	4	crossed	False	8	Tue Nov 23 07:44:54 2021
1263	s14	0.3110956310738073	0.5420557196843506	300	0.3594224619799791	0.2893822624011376	ridge_mdtb1002_150_alpha_8	L2regression	glm7	sc1	sess	True	mdtb1002_150	cerebellum_suit	True	4	crossed	False	8	Tue Nov 23 07:44:55 2021
1264	s06	0.2768901930161363	0.6807726419765797	300	0.3415271356263231	0.3902098756686501	ridge_mdtb1002_150_alpha_8	L2regression	glm7	sc1	sess	True	mdtb1002_150	cerebellum_suit	True	4	crossed	False	8	Tue Nov 23 07:44:56 2021
1265	s22	0.3419577796165608	0.7136341168540591	300	0.435595211437351	0.41991934768533545	ridge_mdtb1002_150_alpha_8	L2regression	glm7	sc1	sess	True	mdtb1002_150	cerebellum_suit	True	4	crossed	False	8	Tue Nov 23 07:44:58 2021
1266	s21	0.3451841157544757	0.5902079586151328	300	0.4105569271039097	0.019510307259218776	ridge_mdtb1002_150_alpha_8	L2regression	glm7	sc1	sess	True	mdtb1002_150	cerebellum_suit	True	4	crossed	False	8	Tue Nov 23 07:44:59 2021
1267	s08	0.4128381025114256	0.3485118014462322	300	0.4407567960495959	0.11193276269534584	ridge_mdtb1002_150_alpha_10	L2regression	glm7	sc1	sess	True	mdtb1002_150	cerebellum_suit	True	4	crossed	False	10	Tue Nov 23 07:45:01 2021
1268	s26	0.3462207006030759	0.4223605277740371	300	0.3774060419182387	0.20027620948314465	ridge_mdtb1002_150_alpha_10	L2regression	glm7	sc1	sess	True	mdtb1002_150	cerebellum_suit	True	4	crossed	False	10	Tue Nov 23 07:45:02 2021
1269	s04	0.3246908469986984	0.4046499803095441	300	0.3684533941649755	0.18350446438368745	ridge_mdtb1002_150_alpha_10	L2regression	glm7	sc1	sess	True	mdtb1002_150	cerebellum_suit	True	4	crossed	False	10	Tue Nov 23 07:45:03 2021
1270	s14	0.33728821577681906	0.3966666591737924	300	0.3671972032742744	0.2590468354772155	ridge_mdtb1002_150_alpha_10	L2regression	glm7	sc1	sess	True	mdtb1002_150	cerebellum_suit	True	4	crossed	False	10	Tue Nov 23 07:45:04 2021
1271	s06	0.31487235811335995	0.5618741849594437	300	0.35912584563579153	0.3337535101986999	ridge_mdtb1002_150_alpha_10	L2regression	glm7	sc1	sess	True	mdtb1002_150	cerebellum_suit	True	4	crossed	False	10	Tue Nov 23 07:45:06 2021
1272	s22	0.3868135640349218	0.5748938384898189	300	0.4596602193504845	0.3130341680372736	ridge_mdtb1002_150_alpha_10	L2regression	glm7	sc1	sess	True	mdtb1002_150	cerebellum_suit	True	4	crossed	False	10	Tue Nov 23 07:45:07 2021
1273	s21	0.3730473643289571	0.3927136672532349	300	0.40693432654891215	-0.006837434338367625	ridge_mdtb1002_150_alpha_10	L2regression	glm7	sc1	sess	True	mdtb1002_150	cerebellum_suit	True	4	crossed	False	10	Tue Nov 23 07:45:08 2021
1274	s08	0.016655157896988602	0.9993419124341408	200	0.6358271598262593	0.0953374346461063	ridge_mdtb1002_100_alpha_-2	L2regression	glm7	sc1	sess	True	mdtb1002_100	cerebellum_suit	True	4	crossed	False	-2	Tue Nov 23 07:42:44 2021
1275	s26	0.01106031648294283	0.9995982946921452	200	0.5348382938458687	0.17416640732233685	ridge_mdtb1002_100_alpha_-2	L2regression	glm7	sc1	sess	True	mdtb1002_100	cerebellum_suit	True	4	crossed	False	-2	Tue Nov 23 07:42:45 2021
1276	s04	0.00956891757006358	0.9996658553855238	200	0.4802274531837568	0.19393501392319606	ridge_mdtb1002_100_alpha_-2	L2regression	glm7	sc1	sess	True	mdtb1002_100	cerebellum_suit	True	4	crossed	False	-2	Tue Nov 23 07:42:47 2021
1277	s14	0.015670660914972125	0.9991414192294424	200	0.5086058707701946	0.18569349783610048	ridge_mdtb1002_100_alpha_-2	L2regression	glm7	sc1	sess	True	mdtb1002_100	cerebellum_suit	True	4	crossed	False	-2	Tue Nov 23 07:42:48 2021
1278	s06	0.008347074194137685	0.9997337626689836	200	0.449408014651104	0.34601605759725224	ridge_mdtb1002_100_alpha_-2	L2regression	glm7	sc1	sess	True	mdtb1002_100	cerebellum_suit	True	4	crossed	False	-2	Tue Nov 23 07:42:50 2021
1279	s22	0.009463512756831216	0.9997815309426648	200	0.5559552636591872	0.3506469525171089	ridge_mdtb1002_100_alpha_-2	L2regression	glm7	sc1	sess	True	mdtb1002_100	cerebellum_suit	True	4	crossed	False	-2	Tue Nov 23 07:42:51 2021
1280	s21	0.01023935062970306	0.9996889353609204	200	0.6043353506783345	0.02769880969672256	ridge_mdtb1002_100_alpha_-2	L2regression	glm7	sc1	sess	True	mdtb1002_100	cerebellum_suit	True	4	crossed	False	-2	Tue Nov 23 07:42:53 2021
1281	s08	0.06832213348558477	0.9888280281734276	200	0.5917752099555464	0.10764768848001044	ridge_mdtb1002_100_alpha_0	L2regression	glm7	sc1	sess	True	mdtb1002_100	cerebellum_suit	True	4	crossed	False	0	Tue Nov 23 07:42:54 2021
1282	s26	0.04926228691069477	0.9920080416098336	200	0.5005239780852714	0.1907891270367391	ridge_mdtb1002_100_alpha_0	L2regression	glm7	sc1	sess	True	mdtb1002_100	cerebellum_suit	True	4	crossed	False	0	Tue Nov 23 07:42:56 2021
1283	s04	0.04137013798899697	0.9937338896237502	200	0.4517142862363459	0.21312647213005328	ridge_mdtb1002_100_alpha_0	L2regression	glm7	sc1	sess	True	mdtb1002_100	cerebellum_suit	True	4	crossed	False	0	Tue Nov 23 07:42:57 2021
1284	s14	0.058960593017329636	0.9877027327426404	200	0.4710474796151175	0.20273348449711948	ridge_mdtb1002_100_alpha_0	L2regression	glm7	sc1	sess	True	mdtb1002_100	cerebellum_suit	True	4	crossed	False	0	Tue Nov 23 07:42:59 2021
1285	s06	0.03728746347745877	0.9947109573125542	200	0.4228822829346442	0.36957074428149	ridge_mdtb1002_100_alpha_0	L2regression	glm7	sc1	sess	True	mdtb1002_100	cerebellum_suit	True	4	crossed	False	0	Tue Nov 23 07:43:00 2021
1286	s22	0.04346434542104057	0.9953987439874528	200	0.5261344333127275	0.3741831476813713	ridge_mdtb1002_100_alpha_0	L2regression	glm7	sc1	sess	True	mdtb1002_100	cerebellum_suit	True	4	crossed	False	0	Tue Nov 23 07:43:02 2021
1287	s21	0.0452080174014121	0.9939728778845672	200	0.5730616515272082	0.02609787855191132	ridge_mdtb1002_100_alpha_0	L2regression	glm7	sc1	sess	True	mdtb1002_100	cerebellum_suit	True	4	crossed	False	0	Tue Nov 23 07:43:03 2021
1288	s08	0.1563404839321829	0.9408190981499605	200	0.5224430553068482	0.1454554317916165	ridge_mdtb1002_100_alpha_2	L2regression	glm7	sc1	sess	True	mdtb1002_100	cerebellum_suit	True	4	crossed	False	2	Tue Nov 23 07:43:04 2021
1289	s26	0.12227051128066165	0.9490441068205004	200	0.44135498489076863	0.2271229520086652	ridge_mdtb1002_100_alpha_2	L2regression	glm7	sc1	sess	True	mdtb1002_100	cerebellum_suit	True	4	crossed	False	2	Tue Nov 23 07:43:06 2021
1290	s04	0.09943199027108958	0.96414711996141	200	0.4117119775755417	0.2409761362376402	ridge_mdtb1002_100_alpha_2	L2regression	glm7	sc1	sess	True	mdtb1002_100	cerebellum_suit	True	4	crossed	False	2	Tue Nov 23 07:43:07 2021
1291	s14	0.12594439746811426	0.9431284141235662	200	0.4234776201810139	0.2291661945095521	ridge_mdtb1002_100_alpha_2	L2regression	glm7	sc1	sess	True	mdtb1002_100	cerebellum_suit	True	4	crossed	False	2	Tue Nov 23 07:43:08 2021
1292	s06	0.09159662523662022	0.9680872602476605	200	0.3792971803761167	0.4101904743093988	ridge_mdtb1002_100_alpha_2	L2regression	glm7	sc1	sess	True	mdtb1002_100	cerebellum_suit	True	4	crossed	False	2	Tue Nov 23 07:43:09 2021
1293	s22	0.11042749310578552	0.970197937034742	200	0.4747197079999976	0.4213848663753473	ridge_mdtb1002_100_alpha_2	L2regression	glm7	sc1	sess	True	mdtb1002_100	cerebellum_suit	True	4	crossed	False	2	Tue Nov 23 07:43:11 2021
1294	s21	0.11253858562449527	0.9632729001766976	200	0.5195697438052329	0.025226281998380732	ridge_mdtb1002_100_alpha_2	L2regression	glm7	sc1	sess	True	mdtb1002_100	cerebellum_suit	True	4	crossed	False	2	Tue Nov 23 07:43:12 2021
1295	s08	0.25887145838159564	0.8298282008849903	200	0.4698420825627903	0.17476501567545374	ridge_mdtb1002_100_alpha_4	L2regression	glm7	sc1	sess	True	mdtb1002_100	cerebellum_suit	True	4	crossed	False	4	Tue Nov 23 07:43:14 2021
1296	s26	0.2035196745308685	0.8490514299494529	200	0.3938033808298307	0.26001962738840745	ridge_mdtb1002_100_alpha_4	L2regression	glm7	sc1	sess	True	mdtb1002_100	cerebellum_suit	True	4	crossed	False	4	Tue Nov 23 07:43:15 2021
1297	s04	0.1772753156521974	0.8838744949443678	200	0.3790817347206783	0.26486502423531555	ridge_mdtb1002_100_alpha_4	L2regression	glm7	sc1	sess	True	mdtb1002_100	cerebellum_suit	True	4	crossed	False	4	Tue Nov 23 07:43:16 2021
1298	s14	0.20229463842385625	0.8480491995475826	200	0.38397554609996776	0.26122488115317394	ridge_mdtb1002_100_alpha_4	L2regression	glm7	sc1	sess	True	mdtb1002_100	cerebellum_suit	True	4	crossed	False	4	Tue Nov 23 07:43:18 2021
1299	s06	0.15982138906721935	0.9008624686256244	200	0.3491829802733345	0.42891192827713465	ridge_mdtb1002_100_alpha_4	L2regression	glm7	sc1	sess	True	mdtb1002_100	cerebellum_suit	True	4	crossed	False	4	Tue Nov 23 07:43:19 2021
1300	s22	0.1955325225532344	0.90435946859923	200	0.4354443973994507	0.4568401649409636	ridge_mdtb1002_100_alpha_4	L2regression	glm7	sc1	sess	True	mdtb1002_100	cerebellum_suit	True	4	crossed	False	4	Tue Nov 23 07:43:21 2021
1301	s21	0.2027543198945317	0.8837129045468147	200	0.4644384082092081	0.030391286204915737	ridge_mdtb1002_100_alpha_4	L2regression	glm7	sc1	sess	True	mdtb1002_100	cerebellum_suit	True	4	crossed	False	4	Tue Nov 23 07:43:22 2021
1302	s08	0.3458706228397689	0.6517268787420258	200	0.44363186386178177	0.1747393707601513	ridge_mdtb1002_100_alpha_6	L2regression	glm7	sc1	sess	True	mdtb1002_100	cerebellum_suit	True	4	crossed	False	6	Tue Nov 23 07:43:24 2021
1303	s26	0.2744597313387901	0.709322412316889	200	0.37130806204886296	0.25925762542348724	ridge_mdtb1002_100_alpha_6	L2regression	glm7	sc1	sess	True	mdtb1002_100	cerebellum_suit	True	4	crossed	False	6	Tue Nov 23 07:43:25 2021
1304	s04	0.2558964927905557	0.7281344217155803	200	0.3609677437318408	0.2709764754233027	ridge_mdtb1002_100_alpha_6	L2regression	glm7	sc1	sess	True	mdtb1002_100	cerebellum_suit	True	4	crossed	False	6	Tue Nov 23 07:43:26 2021
1305	s14	0.2739449637632081	0.688483453025192	200	0.36071002043981787	0.2936949818675377	ridge_mdtb1002_100_alpha_6	L2regression	glm7	sc1	sess	True	mdtb1002_100	cerebellum_suit	True	4	crossed	False	6	Tue Nov 23 07:43:28 2021
1306	s06	0.2311098962880499	0.7806753347395546	200	0.3343566782613238	0.4224881933586686	ridge_mdtb1002_100_alpha_6	L2regression	glm7	sc1	sess	True	mdtb1002_100	cerebellum_suit	True	4	crossed	False	6	Tue Nov 23 07:43:29 2021
1307	s22	0.2820484462706583	0.7959526516472021	200	0.4150798442486215	0.4729522683583948	ridge_mdtb1002_100_alpha_6	L2regression	glm7	sc1	sess	True	mdtb1002_100	cerebellum_suit	True	4	crossed	False	6	Tue Nov 23 07:43:30 2021
1308	s21	0.2978528963851718	0.7304454745220811	200	0.4221357975126472	0.03228791873152651	ridge_mdtb1002_100_alpha_6	L2regression	glm7	sc1	sess	True	mdtb1002_100	cerebellum_suit	True	4	crossed	False	6	Tue Nov 23 07:43:31 2021
1309	s08	0.39584151398568784	0.4606384294326522	200	0.44031047977717136	0.1411175797098304	ridge_mdtb1002_100_alpha_8	L2regression	glm7	sc1	sess	True	mdtb1002_100	cerebellum_suit	True	4	crossed	False	8	Tue Nov 23 07:43:33 2021
1310	s26	0.3261168155694338	0.5377900348639801	200	0.3721517637758089	0.228733497939182	ridge_mdtb1002_100_alpha_8	L2regression	glm7	sc1	sess	True	mdtb1002_100	cerebellum_suit	True	4	crossed	False	8	Tue Nov 23 07:43:34 2021
1311	s04	0.30631574391087063	0.5308467157805756	200	0.3633160337970743	0.22463156541330045	ridge_mdtb1002_100_alpha_8	L2regression	glm7	sc1	sess	True	mdtb1002_100	cerebellum_suit	True	4	crossed	False	8	Tue Nov 23 07:43:36 2021
1312	s14	0.3193848605266552	0.4898955661174133	200	0.3605062710600934	0.2834415013927579	ridge_mdtb1002_100_alpha_8	L2regression	glm7	sc1	sess	True	mdtb1002_100	cerebellum_suit	True	4	crossed	False	8	Tue Nov 23 07:43:37 2021
1313	s06	0.28795943384519	0.6471366919696304	200	0.34534074794762537	0.3787610353835556	ridge_mdtb1002_100_alpha_8	L2regression	glm7	sc1	sess	True	mdtb1002_100	cerebellum_suit	True	4	crossed	False	8	Tue Nov 23 07:43:38 2021
1314	s22	0.3545265443389615	0.6846979074195738	200	0.4398110970935608	0.41539763036927796	ridge_mdtb1002_100_alpha_8	L2regression	glm7	sc1	sess	True	mdtb1002_100	cerebellum_suit	True	4	crossed	False	8	Tue Nov 23 07:43:39 2021
1315	s21	0.35609012109432203	0.5099494741219579	200	0.40995912131094536	0.007189834334894387	ridge_mdtb1002_100_alpha_8	L2regression	glm7	sc1	sess	True	mdtb1002_100	cerebellum_suit	True	4	crossed	False	8	Tue Nov 23 07:43:41 2021
1316	s08	0.4154382633859029	0.31545179992790506	200	0.4409905264134294	0.10215562792461844	ridge_mdtb1002_100_alpha_10	L2regression	glm7	sc1	sess	True	mdtb1002_100	cerebellum_suit	True	4	crossed	False	10	Tue Nov 23 07:43:42 2021
1317	s26	0.3491881077155265	0.3990116274021953	200	0.3784132873362098	0.19654861431193074	ridge_mdtb1002_100_alpha_10	L2regression	glm7	sc1	sess	True	mdtb1002_100	cerebellum_suit	True	4	crossed	False	10	Tue Nov 23 07:43:44 2021
1318	s04	0.32741168615246496	0.3837593575914596	200	0.3693601332569437	0.18022310310040468	ridge_mdtb1002_100_alpha_10	L2regression	glm7	sc1	sess	True	mdtb1002_100	cerebellum_suit	True	4	crossed	False	10	Tue Nov 23 07:43:45 2021
1319	s14	0.3405165063779379	0.37538461901130377	200	0.3687298976735539	0.2555423286970849	ridge_mdtb1002_100_alpha_10	L2regression	glm7	sc1	sess	True	mdtb1002_100	cerebellum_suit	True	4	crossed	False	10	Tue Nov 23 07:43:46 2021
1320	s06	0.31901979518117657	0.5463759243639879	200	0.3613883629970842	0.3245555641301508	ridge_mdtb1002_100_alpha_10	L2regression	glm7	sc1	sess	True	mdtb1002_100	cerebellum_suit	True	4	crossed	False	10	Tue Nov 23 07:43:48 2021
1321	s22	0.3907408510472026	0.5568573034330654	200	0.4612795263202632	0.3182021932231408	ridge_mdtb1002_100_alpha_10	L2regression	glm7	sc1	sess	True	mdtb1002_100	cerebellum_suit	True	4	crossed	False	10	Tue Nov 23 07:43:49 2021
1322	s21	0.3756371505589062	0.3438698418906095	200	0.40679393258625457	-0.015408042979012725	ridge_mdtb1002_100_alpha_10	L2regression	glm7	sc1	sess	True	mdtb1002_100	cerebellum_suit	True	4	crossed	False	10	Tue Nov 23 07:43:51 2021
1323	s08	0.09035713034188704	0.9781314694541394	100	0.6832947606269457	0.1230348947427898	ridge_mdtb1002_050_alpha_-2	L2regression	glm7	sc1	sess	True	mdtb1002_050	cerebellum_suit	True	4	crossed	False	-2	Tue Nov 23 07:41:33 2021
1324	s26	0.07439421925594226	0.97935060629389	100	0.5999307307454701	0.1568289624491575	ridge_mdtb1002_050_alpha_-2	L2regression	glm7	sc1	sess	True	mdtb1002_050	cerebellum_suit	True	4	crossed	False	-2	Tue Nov 23 07:41:34 2021
1325	s04	0.05706449641845252	0.9870224175088668	100	0.5268999706331522	0.18322189983387446	ridge_mdtb1002_050_alpha_-2	L2regression	glm7	sc1	sess	True	mdtb1002_050	cerebellum_suit	True	4	crossed	False	-2	Tue Nov 23 07:41:35 2021
1326	s14	0.07786286829950907	0.9766711680579954	100	0.5534667808517999	0.16916288940056484	ridge_mdtb1002_050_alpha_-2	L2regression	glm7	sc1	sess	True	mdtb1002_050	cerebellum_suit	True	4	crossed	False	-2	Tue Nov 23 07:41:37 2021
1327	s06	0.05851943296441536	0.9858545571346501	100	0.5131400691070654	0.3173117211521994	ridge_mdtb1002_050_alpha_-2	L2regression	glm7	sc1	sess	True	mdtb1002_050	cerebellum_suit	True	4	crossed	False	-2	Tue Nov 23 07:41:38 2021
1328	s22	0.06386437181269188	0.9895328161922038	100	0.5998073405264953	0.3471704341547669	ridge_mdtb1002_050_alpha_-2	L2regression	glm7	sc1	sess	True	mdtb1002_050	cerebellum_suit	True	4	crossed	False	-2	Tue Nov 23 07:41:39 2021
1329	s21	0.06673731456304753	0.9852100846942664	100	0.7004182311314511	0.05377882995957058	ridge_mdtb1002_050_alpha_-2	L2regression	glm7	sc1	sess	True	mdtb1002_050	cerebellum_suit	True	4	crossed	False	-2	Tue Nov 23 07:41:41 2021
1330	s08	0.14957822822571928	0.94068982391836	100	0.5825116654782239	0.14511490183874365	ridge_mdtb1002_050_alpha_0	L2regression	glm7	sc1	sess	True	mdtb1002_050	cerebellum_suit	True	4	crossed	False	0	Tue Nov 23 07:41:42 2021
1331	s26	0.1256006887764365	0.9413638735648306	100	0.5021533771028415	0.20127049692530208	ridge_mdtb1002_050_alpha_0	L2regression	glm7	sc1	sess	True	mdtb1002_050	cerebellum_suit	True	4	crossed	False	0	Tue Nov 23 07:41:43 2021
1332	s04	0.0975038766149542	0.9627792738155608	100	0.4472909853658459	0.2272041805242889	ridge_mdtb1002_050_alpha_0	L2regression	glm7	sc1	sess	True	mdtb1002_050	cerebellum_suit	True	4	crossed	False	0	Tue Nov 23 07:41:44 2021
1333	s14	0.12358088610133447	0.9413844870037416	100	0.4657016953972043	0.20963174079122665	ridge_mdtb1002_050_alpha_0	L2regression	glm7	sc1	sess	True	mdtb1002_050	cerebellum_suit	True	4	crossed	False	0	Tue Nov 23 07:41:45 2021
1334	s06	0.09471994804385378	0.9633214250420608	100	0.4273186159443241	0.3747248428802602	ridge_mdtb1002_050_alpha_0	L2regression	glm7	sc1	sess	True	mdtb1002_050	cerebellum_suit	True	4	crossed	False	0	Tue Nov 23 07:41:46 2021
1335	s22	0.1131424164417882	0.9669753205701912	100	0.5110679139864686	0.3994722167978612	ridge_mdtb1002_050_alpha_0	L2regression	glm7	sc1	sess	True	mdtb1002_050	cerebellum_suit	True	4	crossed	False	0	Tue Nov 23 07:41:48 2021
1336	s21	0.11320778648701	0.9582390196857314	100	0.5859366474102445	0.05276186227300442	ridge_mdtb1002_050_alpha_0	L2regression	glm7	sc1	sess	True	mdtb1002_050	cerebellum_suit	True	4	crossed	False	0	Tue Nov 23 07:41:49 2021
1337	s08	0.2249937910218124	0.8653038139960124	100	0.5070291258806836	0.16862494395186284	ridge_mdtb1002_050_alpha_2	L2regression	glm7	sc1	sess	True	mdtb1002_050	cerebellum_suit	True	4	crossed	False	2	Tue Nov 23 07:41:50 2021
1338	s26	0.18452842885291568	0.8703794015874312	100	0.4234263911276429	0.25237141428830057	ridge_mdtb1002_050_alpha_2	L2regression	glm7	sc1	sess	True	mdtb1002_050	cerebellum_suit	True	4	crossed	False	2	Tue Nov 23 07:41:51 2021
1339	s04	0.15350364101242533	0.9080102741555828	100	0.4031866317306723	0.2551164679063469	ridge_mdtb1002_050_alpha_2	L2regression	glm7	sc1	sess	True	mdtb1002_050	cerebellum_suit	True	4	crossed	False	2	Tue Nov 23 07:41:53 2021
1340	s14	0.1801681053691312	0.8738830349402265	100	0.4124222174912566	0.2440951145493841	ridge_mdtb1002_050_alpha_2	L2regression	glm7	sc1	sess	True	mdtb1002_050	cerebellum_suit	True	4	crossed	False	2	Tue Nov 23 07:41:54 2021
1341	s06	0.13977178217726646	0.919906409847369	100	0.374764197053974	0.4170239237296254	ridge_mdtb1002_050_alpha_2	L2regression	glm7	sc1	sess	True	mdtb1002_050	cerebellum_suit	True	4	crossed	False	2	Tue Nov 23 07:41:55 2021
1342	s22	0.1744758574435873	0.9206067763304532	100	0.4587218245165343	0.44835147583881496	ridge_mdtb1002_050_alpha_2	L2regression	glm7	sc1	sess	True	mdtb1002_050	cerebellum_suit	True	4	crossed	False	2	Tue Nov 23 07:41:56 2021
1343	s21	0.17439451464072092	0.9039145320053872	100	0.5105485323877624	0.05316504864414768	ridge_mdtb1002_050_alpha_2	L2regression	glm7	sc1	sess	True	mdtb1002_050	cerebellum_suit	True	4	crossed	False	2	Tue Nov 23 07:41:57 2021
1344	s08	0.3076024686131409	0.7296063837270503	100	0.4592733762935984	0.18083339219810213	ridge_mdtb1002_050_alpha_4	L2regression	glm7	sc1	sess	True	mdtb1002_050	cerebellum_suit	True	4	crossed	False	4	Tue Nov 23 07:41:58 2021
1345	s26	0.2449707795363473	0.7612723800458419	100	0.38194217764318295	0.27364094424827745	ridge_mdtb1002_050_alpha_4	L2regression	glm7	sc1	sess	True	mdtb1002_050	cerebellum_suit	True	4	crossed	False	4	Tue Nov 23 07:42:00 2021
1346	s04	0.22242437671399087	0.7944294570895482	100	0.3726505993035344	0.2679818707884117	ridge_mdtb1002_050_alpha_4	L2regression	glm7	sc1	sess	True	mdtb1002_050	cerebellum_suit	True	4	crossed	False	4	Tue Nov 23 07:42:01 2021
1347	s14	0.24203563707357825	0.7593451452963027	100	0.3726621968044929	0.2851631168699701	ridge_mdtb1002_050_alpha_4	L2regression	glm7	sc1	sess	True	mdtb1002_050	cerebellum_suit	True	4	crossed	False	4	Tue Nov 23 07:42:02 2021
1348	s06	0.1958629170341308	0.8397759556454137	100	0.3444747177499997	0.43355754506627203	ridge_mdtb1002_050_alpha_4	L2regression	glm7	sc1	sess	True	mdtb1002_050	cerebellum_suit	True	4	crossed	False	4	Tue Nov 23 07:42:03 2021
1349	s22	0.2443492574689133	0.8388539610629135	100	0.4230565206393068	0.4818407739744504	ridge_mdtb1002_050_alpha_4	L2regression	glm7	sc1	sess	True	mdtb1002_050	cerebellum_suit	True	4	crossed	False	4	Tue Nov 23 07:42:04 2021
1350	s21	0.2538312845256171	0.7942791634886706	100	0.4498764289510304	0.05564092548355322	ridge_mdtb1002_050_alpha_4	L2regression	glm7	sc1	sess	True	mdtb1002_050	cerebellum_suit	True	4	crossed	False	4	Tue Nov 23 07:42:06 2021
1351	s08	0.3703147520368035	0.5652222219937416	100	0.44022822926121546	0.17967366978349325	ridge_mdtb1002_050_alpha_6	L2regression	glm7	sc1	sess	True	mdtb1002_050	cerebellum_suit	True	4	crossed	False	6	Tue Nov 23 07:42:07 2021
1352	s26	0.2992640534961907	0.6272304283016038	100	0.3677888374044315	0.26771178585274363	ridge_mdtb1002_050_alpha_6	L2regression	glm7	sc1	sess	True	mdtb1002_050	cerebellum_suit	True	4	crossed	False	6	Tue Nov 23 07:42:08 2021
1353	s04	0.2811457084253416	0.6322717372011992	100	0.360251412045281	0.2626657986875309	ridge_mdtb1002_050_alpha_6	L2regression	glm7	sc1	sess	True	mdtb1002_050	cerebellum_suit	True	4	crossed	False	6	Tue Nov 23 07:42:09 2021
1354	s14	0.29483689898889504	0.6060330881404491	100	0.3565218010234362	0.31245285983359783	ridge_mdtb1002_050_alpha_6	L2regression	glm7	sc1	sess	True	mdtb1002_050	cerebellum_suit	True	4	crossed	False	6	Tue Nov 23 07:42:10 2021
1355	s06	0.2539111711997647	0.7235182065928607	100	0.3334870890935819	0.4239045991728331	ridge_mdtb1002_050_alpha_6	L2regression	glm7	sc1	sess	True	mdtb1002_050	cerebellum_suit	True	4	crossed	False	6	Tue Nov 23 07:42:11 2021
1356	s22	0.31187997517627297	0.7376467536887322	100	0.41198578393325336	0.489973829392254	ridge_mdtb1002_050_alpha_6	L2regression	glm7	sc1	sess	True	mdtb1002_050	cerebellum_suit	True	4	crossed	False	6	Tue Nov 23 07:42:13 2021
1357	s21	0.3258855723808041	0.6358293611852638	100	0.4156028371256935	0.03493770932932292	ridge_mdtb1002_050_alpha_6	L2regression	glm7	sc1	sess	True	mdtb1002_050	cerebellum_suit	True	4	crossed	False	6	Tue Nov 23 07:42:14 2021
1358	s08	0.4057574375821992	0.37914585588803135	100	0.4402842384089771	0.14263684140738025	ridge_mdtb1002_050_alpha_8	L2regression	glm7	sc1	sess	True	mdtb1002_050	cerebellum_suit	True	4	crossed	False	8	Tue Nov 23 07:42:15 2021
1359	s26	0.3375719308415295	0.4672702576811896	100	0.3738143668653061	0.2276380882321801	ridge_mdtb1002_050_alpha_8	L2regression	glm7	sc1	sess	True	mdtb1002_050	cerebellum_suit	True	4	crossed	False	8	Tue Nov 23 07:42:16 2021
1360	s04	0.3164665557258638	0.4523210801669436	100	0.3650626476939001	0.21281149639374825	ridge_mdtb1002_050_alpha_8	L2regression	glm7	sc1	sess	True	mdtb1002_050	cerebellum_suit	True	4	crossed	False	8	Tue Nov 23 07:42:18 2021
1361	s14	0.32812392946543845	0.4364325632494897	100	0.3620460005939554	0.2832698742626131	ridge_mdtb1002_050_alpha_8	L2regression	glm7	sc1	sess	True	mdtb1002_050	cerebellum_suit	True	4	crossed	False	8	Tue Nov 23 07:42:19 2021
1362	s06	0.3014829420600261	0.6208127250332021	100	0.3506841053260665	0.37938731004208603	ridge_mdtb1002_050_alpha_8	L2regression	glm7	sc1	sess	True	mdtb1002_050	cerebellum_suit	True	4	crossed	False	8	Tue Nov 23 07:42:20 2021
1363	s22	0.369748214693253	0.6359955784929907	100	0.4442440019349269	0.4245309471439291	ridge_mdtb1002_050_alpha_8	L2regression	glm7	sc1	sess	True	mdtb1002_050	cerebellum_suit	True	4	crossed	False	8	Tue Nov 23 07:42:21 2021
1364	s21	0.3660333679444357	0.4312986821908147	100	0.4086120246121693	-0.008305866599348642	ridge_mdtb1002_050_alpha_8	L2regression	glm7	sc1	sess	True	mdtb1002_050	cerebellum_suit	True	4	crossed	False	8	Tue Nov 23 07:42:22 2021
1365	s08	0.4181073579014472	0.27803234350525163	100	0.4410097825913256	0.11497028250189613	ridge_mdtb1002_050_alpha_10	L2regression	glm7	sc1	sess	True	mdtb1002_050	cerebellum_suit	True	4	crossed	False	10	Tue Nov 23 07:42:23 2021
1366	s26	0.3525162921692829	0.36327776895189895	100	0.3795836573401691	0.19789227861491213	ridge_mdtb1002_050_alpha_10	L2regression	glm7	sc1	sess	True	mdtb1002_050	cerebellum_suit	True	4	crossed	False	10	Tue Nov 23 07:42:25 2021
1367	s04	0.3305686753793034	0.35262295871351496	100	0.3705042129629358	0.17956509788952588	ridge_mdtb1002_050_alpha_10	L2regression	glm7	sc1	sess	True	mdtb1002_050	cerebellum_suit	True	4	crossed	False	10	Tue Nov 23 07:42:26 2021
1368	s14	0.3444533299294139	0.362864328872004	100	0.3708325849115733	0.26189764340946803	ridge_mdtb1002_050_alpha_10	L2regression	glm7	sc1	sess	True	mdtb1002_050	cerebellum_suit	True	4	crossed	False	10	Tue Nov 23 07:42:27 2021
1369	s06	0.3234582409906812	0.5582471899777499	100	0.36375343175582187	0.34131449480527365	ridge_mdtb1002_050_alpha_10	L2regression	glm7	sc1	sess	True	mdtb1002_050	cerebellum_suit	True	4	crossed	False	10	Tue Nov 23 07:42:28 2021
1370	s22	0.3948348735814515	0.5477033590663855	100	0.4627715447657058	0.3587245211574053	ridge_mdtb1002_050_alpha_10	L2regression	glm7	sc1	sess	True	mdtb1002_050	cerebellum_suit	True	4	crossed	False	10	Tue Nov 23 07:42:30 2021
1371	s21	0.3781182584094378	0.3137471743550524	100	0.4064766352707569	-0.02367670076494809	ridge_mdtb1002_050_alpha_10	L2regression	glm7	sc1	sess	True	mdtb1002_050	cerebellum_suit	True	4	crossed	False	10	Tue Nov 23 07:42:31 2021
1372	s08	0.21566407655151806	0.8629748754447897	50	0.6463549131428803	0.09160465332738484	ridge_mdtb1002_025_alpha_-2	L2regression	glm7	sc1	sess	True	mdtb1002_025	cerebellum_suit	True	4	crossed	False	-2	Tue Nov 23 07:40:20 2021
1373	s26	0.16778056280497106	0.8873597227334413	50	0.504060000058701	0.23478656232590314	ridge_mdtb1002_025_alpha_-2	L2regression	glm7	sc1	sess	True	mdtb1002_025	cerebellum_suit	True	4	crossed	False	-2	Tue Nov 23 07:40:22 2021
1374	s04	0.146754193514986	0.9076853525685334	50	0.5084291673757473	0.14733375154168615	ridge_mdtb1002_025_alpha_-2	L2regression	glm7	sc1	sess	True	mdtb1002_025	cerebellum_suit	True	4	crossed	False	-2	Tue Nov 23 07:40:23 2021
1375	s14	0.16934677249693955	0.8801497106848165	50	0.5001062984541049	0.1773937244203357	ridge_mdtb1002_025_alpha_-2	L2regression	glm7	sc1	sess	True	mdtb1002_025	cerebellum_suit	True	4	crossed	False	-2	Tue Nov 23 07:40:25 2021
1376	s06	0.13837981088371246	0.9174461537674916	50	0.4542700051951141	0.3241598933516831	ridge_mdtb1002_025_alpha_-2	L2regression	glm7	sc1	sess	True	mdtb1002_025	cerebellum_suit	True	4	crossed	False	-2	Tue Nov 23 07:40:26 2021
1377	s22	0.16360403425372572	0.9275308216412086	50	0.5210589038529652	0.4351904700566265	ridge_mdtb1002_025_alpha_-2	L2regression	glm7	sc1	sess	True	mdtb1002_025	cerebellum_suit	True	4	crossed	False	-2	Tue Nov 23 07:40:28 2021
1378	s21	0.16266447148190016	0.9081448372843988	50	0.6128268769390055	0.058323828261892176	ridge_mdtb1002_025_alpha_-2	L2regression	glm7	sc1	sess	True	mdtb1002_025	cerebellum_suit	True	4	crossed	False	-2	Tue Nov 23 07:40:29 2021
1379	s08	0.2531070567665861	0.8076943747516715	50	0.5559166714398303	0.15262631573832006	ridge_mdtb1002_025_alpha_0	L2regression	glm7	sc1	sess	True	mdtb1002_025	cerebellum_suit	True	4	crossed	False	0	Tue Nov 23 07:40:30 2021
1380	s26	0.19451980671071228	0.8482585834115822	50	0.44184405170884383	0.2504219939803097	ridge_mdtb1002_025_alpha_0	L2regression	glm7	sc1	sess	True	mdtb1002_025	cerebellum_suit	True	4	crossed	False	0	Tue Nov 23 07:40:32 2021
1381	s04	0.17324509774072538	0.8709196935562805	50	0.4485946334541673	0.18121696495493814	ridge_mdtb1002_025_alpha_0	L2regression	glm7	sc1	sess	True	mdtb1002_025	cerebellum_suit	True	4	crossed	False	0	Tue Nov 23 07:40:33 2021
1382	s14	0.1971681616528148	0.8365093032978843	50	0.4347394315439257	0.22735065578365304	ridge_mdtb1002_025_alpha_0	L2regression	glm7	sc1	sess	True	mdtb1002_025	cerebellum_suit	True	4	crossed	False	0	Tue Nov 23 07:40:34 2021
1383	s06	0.16157456205043408	0.8863338734611556	50	0.4005431760277827	0.3730387617863632	ridge_mdtb1002_025_alpha_0	L2regression	glm7	sc1	sess	True	mdtb1002_025	cerebellum_suit	True	4	crossed	False	0	Tue Nov 23 07:40:35 2021
1384	s22	0.1883242331731865	0.9033543933856272	50	0.4692164885426798	0.4610467088040819	ridge_mdtb1002_025_alpha_0	L2regression	glm7	sc1	sess	True	mdtb1002_025	cerebellum_suit	True	4	crossed	False	0	Tue Nov 23 07:40:36 2021
1385	s21	0.19196936666856104	0.8735148931451229	50	0.5487859219590834	0.035086015003183965	ridge_mdtb1002_025_alpha_0	L2regression	glm7	sc1	sess	True	mdtb1002_025	cerebellum_suit	True	4	crossed	False	0	Tue Nov 23 07:40:37 2021
1386	s08	0.29933660481165786	0.7213343468170214	50	0.4851717885463502	0.1967435117176028	ridge_mdtb1002_025_alpha_2	L2regression	glm7	sc1	sess	True	mdtb1002_025	cerebellum_suit	True	4	crossed	False	2	Tue Nov 23 07:40:39 2021
1387	s26	0.2365396728787213	0.7655808687604743	50	0.4012058953785613	0.2713138173667949	ridge_mdtb1002_025_alpha_2	L2regression	glm7	sc1	sess	True	mdtb1002_025	cerebellum_suit	True	4	crossed	False	2	Tue Nov 23 07:40:40 2021
1388	s04	0.21826287831043464	0.7869162613558347	50	0.4044037615949387	0.2058853914564729	ridge_mdtb1002_025_alpha_2	L2regression	glm7	sc1	sess	True	mdtb1002_025	cerebellum_suit	True	4	crossed	False	2	Tue Nov 23 07:40:41 2021
1389	s14	0.2363468754714388	0.7571724930418857	50	0.3917598367159415	0.2675654880823743	ridge_mdtb1002_025_alpha_2	L2regression	glm7	sc1	sess	True	mdtb1002_025	cerebellum_suit	True	4	crossed	False	2	Tue Nov 23 07:40:42 2021
1390	s06	0.1954315608818692	0.8293064009161083	50	0.3660112924322359	0.408770691546932	ridge_mdtb1002_025_alpha_2	L2regression	glm7	sc1	sess	True	mdtb1002_025	cerebellum_suit	True	4	crossed	False	2	Tue Nov 23 07:40:43 2021
1391	s22	0.2324014413142444	0.8492693803042862	50	0.4450220676423621	0.4701807209119076	ridge_mdtb1002_025_alpha_2	L2regression	glm7	sc1	sess	True	mdtb1002_025	cerebellum_suit	True	4	crossed	False	2	Tue Nov 23 07:40:44 2021
1392	s21	0.2461474193097536	0.7869013673119545	50	0.4833721143615197	0.03979032375850372	ridge_mdtb1002_025_alpha_2	L2regression	glm7	sc1	sess	True	mdtb1002_025	cerebellum_suit	True	4	crossed	False	2	Tue Nov 23 07:40:46 2021
1393	s08	0.34592845152611984	0.6118399595927619	50	0.4476946717886562	0.21139206163186766	ridge_mdtb1002_025_alpha_4	L2regression	glm7	sc1	sess	True	mdtb1002_025	cerebellum_suit	True	4	crossed	False	4	Tue Nov 23 07:40:47 2021
1394	s26	0.2759892326859686	0.6690549422483779	50	0.3735247441455144	0.2846670968911005	ridge_mdtb1002_025_alpha_4	L2regression	glm7	sc1	sess	True	mdtb1002_025	cerebellum_suit	True	4	crossed	False	4	Tue Nov 23 07:40:48 2021
1395	s04	0.265402373846969	0.6571344734709114	50	0.3733683313202946	0.2346185666533824	ridge_mdtb1002_025_alpha_4	L2regression	glm7	sc1	sess	True	mdtb1002_025	cerebellum_suit	True	4	crossed	False	4	Tue Nov 23 07:40:49 2021
1396	s14	0.27568287985906703	0.6526323216172685	50	0.3647863292659007	0.2981733835998444	ridge_mdtb1002_025_alpha_4	L2regression	glm7	sc1	sess	True	mdtb1002_025	cerebellum_suit	True	4	crossed	False	4	Tue Nov 23 07:40:50 2021
1397	s06	0.2328060477051299	0.7506018018968507	50	0.3397038819473858	0.4310627018026237	ridge_mdtb1002_025_alpha_4	L2regression	glm7	sc1	sess	True	mdtb1002_025	cerebellum_suit	True	4	crossed	False	4	Tue Nov 23 07:40:51 2021
1398	s22	0.283196787930094	0.7665345043360687	50	0.4192046226220864	0.4869541630643258	ridge_mdtb1002_025_alpha_4	L2regression	glm7	sc1	sess	True	mdtb1002_025	cerebellum_suit	True	4	crossed	False	4	Tue Nov 23 07:40:53 2021
1399	s21	0.3033444693803279	0.6530164309486081	50	0.4306437556212547	0.06644229770908892	ridge_mdtb1002_025_alpha_4	L2regression	glm7	sc1	sess	True	mdtb1002_025	cerebellum_suit	True	4	crossed	False	4	Tue Nov 23 07:40:54 2021
1400	s08	0.38806699465368943	0.4853361813300049	50	0.4389595970033664	0.18416270498117865	ridge_mdtb1002_025_alpha_6	L2regression	glm7	sc1	sess	True	mdtb1002_025	cerebellum_suit	True	4	crossed	False	6	Tue Nov 23 07:40:55 2021
1401	s26	0.3160354532266609	0.5624353608953354	50	0.3678062347392876	0.2676930442123859	ridge_mdtb1002_025_alpha_6	L2regression	glm7	sc1	sess	True	mdtb1002_025	cerebellum_suit	True	4	crossed	False	6	Tue Nov 23 07:40:56 2021
1402	s04	0.3014266302673837	0.519725965032269	50	0.3624757462202978	0.2371570031455577	ridge_mdtb1002_025_alpha_6	L2regression	glm7	sc1	sess	True	mdtb1002_025	cerebellum_suit	True	4	crossed	False	6	Tue Nov 23 07:40:57 2021
1403	s14	0.3108289307510829	0.5265760743976725	50	0.3573665221383981	0.3057358536571843	ridge_mdtb1002_025_alpha_6	L2regression	glm7	sc1	sess	True	mdtb1002_025	cerebellum_suit	True	4	crossed	False	6	Tue Nov 23 07:40:58 2021
1404	s06	0.2733957460182768	0.6637207774239301	50	0.3347524643609459	0.42276216085954144	ridge_mdtb1002_025_alpha_6	L2regression	glm7	sc1	sess	True	mdtb1002_025	cerebellum_suit	True	4	crossed	False	6	Tue Nov 23 07:41:00 2021
1405	s22	0.3332441944748097	0.6849143636462621	50	0.4157033484466589	0.4852626254163333	ridge_mdtb1002_025_alpha_6	L2regression	glm7	sc1	sess	True	mdtb1002_025	cerebellum_suit	True	4	crossed	False	6	Tue Nov 23 07:41:01 2021
1406	s21	0.34817190441093715	0.5100968479125375	50	0.4099510593147223	0.051119945448857534	ridge_mdtb1002_025_alpha_6	L2regression	glm7	sc1	sess	True	mdtb1002_025	cerebellum_suit	True	4	crossed	False	6	Tue Nov 23 07:41:02 2021
1407	s08	0.4122092250205096	0.3181951172248176	50	0.4406256301951231	0.12434265329974242	ridge_mdtb1002_025_alpha_8	L2regression	glm7	sc1	sess	True	mdtb1002_025	cerebellum_suit	True	4	crossed	False	8	Tue Nov 23 07:41:03 2021
1408	s26	0.3447427216396839	0.4251686677078092	50	0.37612660458616265	0.2192785310562004	ridge_mdtb1002_025_alpha_8	L2regression	glm7	sc1	sess	True	mdtb1002_025	cerebellum_suit	True	4	crossed	False	8	Tue Nov 23 07:41:05 2021
1409	s04	0.32352539068345393	0.3813506513325032	50	0.3673370074499572	0.19356442504772767	ridge_mdtb1002_025_alpha_8	L2regression	glm7	sc1	sess	True	mdtb1002_025	cerebellum_suit	True	4	crossed	False	8	Tue Nov 23 07:41:06 2021
1410	s14	0.3350430187729876	0.39804092223159177	50	0.3651069667071951	0.27317611030386657	ridge_mdtb1002_025_alpha_8	L2regression	glm7	sc1	sess	True	mdtb1002_025	cerebellum_suit	True	4	crossed	False	8	Tue Nov 23 07:41:07 2021
1411	s06	0.3112181349048453	0.5918523994761293	50	0.3551394638945369	0.3849758053757821	ridge_mdtb1002_025_alpha_8	L2regression	glm7	sc1	sess	True	mdtb1002_025	cerebellum_suit	True	4	crossed	False	8	Tue Nov 23 07:41:08 2021
1412	s22	0.3794822689882232	0.6168483961838299	50	0.4488760768733441	0.4485096070586534	ridge_mdtb1002_025_alpha_8	L2regression	glm7	sc1	sess	True	mdtb1002_025	cerebellum_suit	True	4	crossed	False	8	Tue Nov 23 07:41:09 2021
1413	s21	0.3723488985185608	0.3528282509575108	50	0.4069950881117335	0.004787148884227445	ridge_mdtb1002_025_alpha_8	L2regression	glm7	sc1	sess	True	mdtb1002_025	cerebellum_suit	True	4	crossed	False	8	Tue Nov 23 07:41:11 2021
1414	s08	0.4198595384571479	0.2577813505886555	50	0.4413169155854853	0.10365439629236722	ridge_mdtb1002_025_alpha_10	L2regression	glm7	sc1	sess	True	mdtb1002_025	cerebellum_suit	True	4	crossed	False	10	Tue Nov 23 07:41:12 2021
1415	s26	0.3544407088994732	0.3605633534790653	50	0.3804838891728345	0.1980485602316805	ridge_mdtb1002_025_alpha_10	L2regression	glm7	sc1	sess	True	mdtb1002_025	cerebellum_suit	True	4	crossed	False	10	Tue Nov 23 07:41:13 2021
1416	s04	0.3325596556088691	0.3268552240891938	50	0.3714296170179951	0.17363860869485775	ridge_mdtb1002_025_alpha_10	L2regression	glm7	sc1	sess	True	mdtb1002_025	cerebellum_suit	True	4	crossed	False	10	Tue Nov 23 07:41:15 2021
1417	s14	0.3473192316394902	0.3559637232701803	50	0.3726062326905073	0.26030686946733345	ridge_mdtb1002_025_alpha_10	L2regression	glm7	sc1	sess	True	mdtb1002_025	cerebellum_suit	True	4	crossed	False	10	Tue Nov 23 07:41:16 2021
1418	s06	0.32580507674398146	0.5599323220165094	50	0.3649744797375076	0.36568401463723177	ridge_mdtb1002_025_alpha_10	L2regression	glm7	sc1	sess	True	mdtb1002_025	cerebellum_suit	True	4	crossed	False	10	Tue Nov 23 07:41:17 2021
1419	s22	0.3973294065477738	0.5829110600515303	50	0.4640649016862608	0.426190019943669	ridge_mdtb1002_025_alpha_10	L2regression	glm7	sc1	sess	True	mdtb1002_025	cerebellum_suit	True	4	crossed	False	10	Tue Nov 23 07:41:19 2021
1420	s21	0.3795079998560459	0.28929473381315457	50	0.406189360865584	-0.008638358145485931	ridge_mdtb1002_025_alpha_10	L2regression	glm7	sc1	sess	True	mdtb1002_025	cerebellum_suit	True	4	crossed	False	10	Tue Nov 23 07:41:20 2021
1421	s08	0.3337400248491016	0.6172754492298986	14	0.4883472587983488	0.21843515398578456	ridge_mdtb1002_007_alpha_-2	L2regression	glm7	sc1	sess	True	mdtb1002_007	cerebellum_suit	True	4	crossed	False	-2	Tue Nov 23 07:39:05 2021
1422	s26	0.28152275334696997	0.6258547935702358	14	0.4203928365237563	0.2188019798365113	ridge_mdtb1002_007_alpha_-2	L2regression	glm7	sc1	sess	True	mdtb1002_007	cerebellum_suit	True	4	crossed	False	-2	Tue Nov 23 07:39:06 2021
1423	s04	0.2684861517477342	0.6125025076261837	14	0.4424124374496489	0.10932515953766016	ridge_mdtb1002_007_alpha_-2	L2regression	glm7	sc1	sess	True	mdtb1002_007	cerebellum_suit	True	4	crossed	False	-2	Tue Nov 23 07:39:08 2021
1424	s14	0.2719387141570637	0.6413698375548939	14	0.3997576147955612	0.2604119165629333	ridge_mdtb1002_007_alpha_-2	L2regression	glm7	sc1	sess	True	mdtb1002_007	cerebellum_suit	True	4	crossed	False	-2	Tue Nov 23 07:39:09 2021
1425	s06	0.23336251242096065	0.7346068976819258	14	0.3697027316647685	0.4153197028626585	ridge_mdtb1002_007_alpha_-2	L2regression	glm7	sc1	sess	True	mdtb1002_007	cerebellum_suit	True	4	crossed	False	-2	Tue Nov 23 07:39:11 2021
1426	s22	0.29206731461899554	0.7343463159683726	14	0.4530615791456857	0.4529710067279512	ridge_mdtb1002_007_alpha_-2	L2regression	glm7	sc1	sess	True	mdtb1002_007	cerebellum_suit	True	4	crossed	False	-2	Tue Nov 23 07:39:12 2021
1427	s21	0.3109695866797523	0.5853491721949461	14	0.4902067907807659	0.05236218270276778	ridge_mdtb1002_007_alpha_-2	L2regression	glm7	sc1	sess	True	mdtb1002_007	cerebellum_suit	True	4	crossed	False	-2	Tue Nov 23 07:39:14 2021
1428	s08	0.34048150454323445	0.5995457674437099	14	0.4663040967063426	0.235287165134356	ridge_mdtb1002_007_alpha_0	L2regression	glm7	sc1	sess	True	mdtb1002_007	cerebellum_suit	True	4	crossed	False	0	Tue Nov 23 07:39:15 2021
1429	s26	0.2851305898208979	0.6151172539850619	14	0.4018788304929927	0.231516346642302	ridge_mdtb1002_007_alpha_0	L2regression	glm7	sc1	sess	True	mdtb1002_007	cerebellum_suit	True	4	crossed	False	0	Tue Nov 23 07:39:16 2021
1430	s04	0.2724203849340933	0.6001681006045515	14	0.41177964655456656	0.14614423973686694	ridge_mdtb1002_007_alpha_0	L2regression	glm7	sc1	sess	True	mdtb1002_007	cerebellum_suit	True	4	crossed	False	0	Tue Nov 23 07:39:17 2021
1431	s14	0.2783048208670259	0.6214269310759287	14	0.382650145785948	0.27561811629407795	ridge_mdtb1002_007_alpha_0	L2regression	glm7	sc1	sess	True	mdtb1002_007	cerebellum_suit	True	4	crossed	False	0	Tue Nov 23 07:39:19 2021
1432	s06	0.2362692387857329	0.7272035010513993	14	0.3543643254858512	0.4350068710374527	ridge_mdtb1002_007_alpha_0	L2regression	glm7	sc1	sess	True	mdtb1002_007	cerebellum_suit	True	4	crossed	False	0	Tue Nov 23 07:39:20 2021
1433	s22	0.2958703924576289	0.7264782550509903	14	0.4399198207723364	0.4681187957035417	ridge_mdtb1002_007_alpha_0	L2regression	glm7	sc1	sess	True	mdtb1002_007	cerebellum_suit	True	4	crossed	False	0	Tue Nov 23 07:39:21 2021
1434	s21	0.31526742183383083	0.571220640381653	14	0.4686668898040649	0.050976541944164316	ridge_mdtb1002_007_alpha_0	L2regression	glm7	sc1	sess	True	mdtb1002_007	cerebellum_suit	True	4	crossed	False	0	Tue Nov 23 07:39:23 2021
1435	s08	0.35933701475232743	0.5458340467240262	14	0.4467661605907881	0.234403355468532	ridge_mdtb1002_007_alpha_2	L2regression	glm7	sc1	sess	True	mdtb1002_007	cerebellum_suit	True	4	crossed	False	2	Tue Nov 23 07:39:24 2021
1436	s26	0.2977042165525807	0.5740208671207181	14	0.3840667432355059	0.2355847850377477	ridge_mdtb1002_007_alpha_2	L2regression	glm7	sc1	sess	True	mdtb1002_007	cerebellum_suit	True	4	crossed	False	2	Tue Nov 23 07:39:26 2021
1437	s04	0.2848812169518822	0.5547658322350618	14	0.3815480914878151	0.1934549531402083	ridge_mdtb1002_007_alpha_2	L2regression	glm7	sc1	sess	True	mdtb1002_007	cerebellum_suit	True	4	crossed	False	2	Tue Nov 23 07:39:27 2021
1438	s14	0.29263242748489765	0.5721672694867179	14	0.3663456453748381	0.2930586352008402	ridge_mdtb1002_007_alpha_2	L2regression	glm7	sc1	sess	True	mdtb1002_007	cerebellum_suit	True	4	crossed	False	2	Tue Nov 23 07:39:28 2021
1439	s06	0.24624985462005816	0.7011546467449141	14	0.3392656505701407	0.445455574349774	ridge_mdtb1002_007_alpha_2	L2regression	glm7	sc1	sess	True	mdtb1002_007	cerebellum_suit	True	4	crossed	False	2	Tue Nov 23 07:39:29 2021
1440	s22	0.3074979578202	0.7021726138825753	14	0.4225056064721992	0.4832928909612276	ridge_mdtb1002_007_alpha_2	L2regression	glm7	sc1	sess	True	mdtb1002_007	cerebellum_suit	True	4	crossed	False	2	Tue Nov 23 07:39:30 2021
1441	s21	0.32799333232865385	0.5273761518709349	14	0.4367297593276947	0.059301936680978086	ridge_mdtb1002_007_alpha_2	L2regression	glm7	sc1	sess	True	mdtb1002_007	cerebellum_suit	True	4	crossed	False	2	Tue Nov 23 07:39:32 2021
1442	s08	0.38637275300662144	0.45594525925923707	14	0.44019918769592187	0.19757616499683373	ridge_mdtb1002_007_alpha_4	L2regression	glm7	sc1	sess	True	mdtb1002_007	cerebellum_suit	True	4	crossed	False	4	Tue Nov 23 07:39:33 2021
1443	s26	0.3185323385194812	0.4999611781690636	14	0.3730467937993289	0.2289145184414328	ridge_mdtb1002_007_alpha_4	L2regression	glm7	sc1	sess	True	mdtb1002_007	cerebellum_suit	True	4	crossed	False	4	Tue Nov 23 07:39:35 2021
1444	s04	0.3030548871553716	0.4751471197647912	14	0.3664793303688364	0.210269770364476	ridge_mdtb1002_007_alpha_4	L2regression	glm7	sc1	sess	True	mdtb1002_007	cerebellum_suit	True	4	crossed	False	4	Tue Nov 23 07:39:36 2021
1445	s14	0.3121724059745713	0.4943167708337673	14	0.3581887483065404	0.3005204586699777	ridge_mdtb1002_007_alpha_4	L2regression	glm7	sc1	sess	True	mdtb1002_007	cerebellum_suit	True	4	crossed	False	4	Tue Nov 23 07:39:37 2021
1446	s06	0.2666978921636015	0.6535291459143758	14	0.33132149578649994	0.43576044633739214	ridge_mdtb1002_007_alpha_4	L2regression	glm7	sc1	sess	True	mdtb1002_007	cerebellum_suit	True	4	crossed	False	4	Tue Nov 23 07:39:38 2021
1447	s22	0.3295132514077062	0.6622352629952428	14	0.412503301811552	0.4817228573574392	ridge_mdtb1002_007_alpha_4	L2regression	glm7	sc1	sess	True	mdtb1002_007	cerebellum_suit	True	4	crossed	False	4	Tue Nov 23 07:39:40 2021
1448	s21	0.34884129566812205	0.4529524908632109	14	0.4152401574031236	0.04095842877876525	ridge_mdtb1002_007_alpha_4	L2regression	glm7	sc1	sess	True	mdtb1002_007	cerebellum_suit	True	4	crossed	False	4	Tue Nov 23 07:39:41 2021
1449	s08	0.40904438887072736	0.3164007940923418	14	0.4412589283181373	0.13313424602914406	ridge_mdtb1002_007_alpha_6	L2regression	glm7	sc1	sess	True	mdtb1002_007	cerebellum_suit	True	4	crossed	False	6	Tue Nov 23 07:39:42 2021
1450	s26	0.3406295854128605	0.3985674311799938	14	0.3746857813481008	0.2040893365904444	ridge_mdtb1002_007_alpha_6	L2regression	glm7	sc1	sess	True	mdtb1002_007	cerebellum_suit	True	4	crossed	False	6	Tue Nov 23 07:39:43 2021
1451	s04	0.3203769532769597	0.3667760741949581	14	0.36677697271449694	0.18232582750797416	ridge_mdtb1002_007_alpha_6	L2regression	glm7	sc1	sess	True	mdtb1002_007	cerebellum_suit	True	4	crossed	False	6	Tue Nov 23 07:39:44 2021
1452	s14	0.3310387276706043	0.3889494292223278	14	0.3623378836659032	0.2709009250467982	ridge_mdtb1002_007_alpha_6	L2regression	glm7	sc1	sess	True	mdtb1002_007	cerebellum_suit	True	4	crossed	False	6	Tue Nov 23 07:39:46 2021
1453	s06	0.30018728864022565	0.5916559676393629	14	0.3469201041510275	0.3950375846536233	ridge_mdtb1002_007_alpha_6	L2regression	glm7	sc1	sess	True	mdtb1002_007	cerebellum_suit	True	4	crossed	False	6	Tue Nov 23 07:39:47 2021
1454	s22	0.3674290110881357	0.6023696564476496	14	0.4367964778883777	0.4440651305697686	ridge_mdtb1002_007_alpha_6	L2regression	glm7	sc1	sess	True	mdtb1002_007	cerebellum_suit	True	4	crossed	False	6	Tue Nov 23 07:39:48 2021
1455	s21	0.369344024628854	0.3339614039170985	14	0.4092534766583501	-0.011525845424948954	ridge_mdtb1002_007_alpha_6	L2regression	glm7	sc1	sess	True	mdtb1002_007	cerebellum_suit	True	4	crossed	False	6	Tue Nov 23 07:39:50 2021
1456	s08	0.4183996431648125	0.2334341155251673	14	0.4411858592190525	0.09945836483753588	ridge_mdtb1002_007_alpha_8	L2regression	glm7	sc1	sess	True	mdtb1002_007	cerebellum_suit	True	4	crossed	False	8	Tue Nov 23 07:39:51 2021
1457	s26	0.35264659058775033	0.32004562397787484	14	0.379527657364646	0.17888068574289395	ridge_mdtb1002_007_alpha_8	L2regression	glm7	sc1	sess	True	mdtb1002_007	cerebellum_suit	True	4	crossed	False	8	Tue Nov 23 07:39:52 2021
1458	s04	0.3306803922842855	0.2992203704794635	14	0.3705691071036431	0.15638510016413215	ridge_mdtb1002_007_alpha_8	L2regression	glm7	sc1	sess	True	mdtb1002_007	cerebellum_suit	True	4	crossed	False	8	Tue Nov 23 07:39:54 2021
1459	s14	0.3441487228569651	0.33349563925972675	14	0.3703147711475057	0.2508639162696717	ridge_mdtb1002_007_alpha_8	L2regression	glm7	sc1	sess	True	mdtb1002_007	cerebellum_suit	True	4	crossed	False	8	Tue Nov 23 07:39:55 2021
1460	s06	0.3225728127134436	0.5484817175670962	14	0.3626822579479619	0.3613286158307541	ridge_mdtb1002_007_alpha_8	L2regression	glm7	sc1	sess	True	mdtb1002_007	cerebellum_suit	True	4	crossed	False	8	Tue Nov 23 07:39:56 2021
1461	s22	0.3933675730512544	0.5408401595268444	14	0.4604622192856441	0.3989000973671976	ridge_mdtb1002_007_alpha_8	L2regression	glm7	sc1	sess	True	mdtb1002_007	cerebellum_suit	True	4	crossed	False	8	Tue Nov 23 07:39:57 2021
1462	s21	0.3783061783665165	0.2482366088781316	14	0.4066943117260727	-0.03283167087015538	ridge_mdtb1002_007_alpha_8	L2regression	glm7	sc1	sess	True	mdtb1002_007	cerebellum_suit	True	4	crossed	False	8	Tue Nov 23 07:39:59 2021
1463	s08	0.42125423419262187	0.2181595930666456	14	0.4415839156560454	0.09352201111762948	ridge_mdtb1002_007_alpha_10	L2regression	glm7	sc1	sess	True	mdtb1002_007	cerebellum_suit	True	4	crossed	False	10	Tue Nov 23 07:40:00 2021
1464	s26	0.356034286353555	0.3013028135468652	14	0.3812479726349137	0.17299363582462748	ridge_mdtb1002_007_alpha_10	L2regression	glm7	sc1	sess	True	mdtb1002_007	cerebellum_suit	True	4	crossed	False	10	Tue Nov 23 07:40:01 2021
1465	s04	0.334309118832193	0.2843922925305307	14	0.3723116400225097	0.15071138168865994	ridge_mdtb1002_007_alpha_10	L2regression	glm7	sc1	sess	True	mdtb1002_007	cerebellum_suit	True	4	crossed	False	10	Tue Nov 23 07:40:03 2021
1466	s14	0.3498925668172229	0.3229891112570933	14	0.3742071414888796	0.24709017289803664	ridge_mdtb1002_007_alpha_10	L2regression	glm7	sc1	sess	True	mdtb1002_007	cerebellum_suit	True	4	crossed	False	10	Tue Nov 23 07:40:04 2021
1467	s06	0.3279415833572216	0.536386115571877	14	0.3663973437515903	0.35280801324006017	ridge_mdtb1002_007_alpha_10	L2regression	glm7	sc1	sess	True	mdtb1002_007	cerebellum_suit	True	4	crossed	False	10	Tue Nov 23 07:40:05 2021
1468	s22	0.39995055904802174	0.522518110721981	14	0.4662080968924615	0.38709839355019937	ridge_mdtb1002_007_alpha_10	L2regression	glm7	sc1	sess	True	mdtb1002_007	cerebellum_suit	True	4	crossed	False	10	Tue Nov 23 07:40:06 2021
1469	s21	0.380674957834329	0.2304295349868841	14	0.4061745337169085	-0.03623471458325502	ridge_mdtb1002_007_alpha_10	L2regression	glm7	sc1	sess	True	mdtb1002_007	cerebellum_suit	True	4	crossed	False	10	Tue Nov 23 07:40:08 2021
1470	s08	0.3228879472805341	0.6483242527016795	17	0.4993504488261686	0.21886392376760808	ridge_yeo17_alpha_-2	L2regression	glm7	sc1	sess	True	yeo17	cerebellum_suit	True	4	crossed	False	-2	Tue Nov 23 07:37:51 2021
1471	s26	0.26705238583114554	0.6697781409251908	17	0.4255218770794869	0.2439811401836171	ridge_yeo17_alpha_-2	L2regression	glm7	sc1	sess	True	yeo17	cerebellum_suit	True	4	crossed	False	-2	Tue Nov 23 07:37:52 2021
1472	s04	0.2582344461293241	0.6487681946778149	17	0.460378471427841	0.10841779661720792	ridge_yeo17_alpha_-2	L2regression	glm7	sc1	sess	True	yeo17	cerebellum_suit	True	4	crossed	False	-2	Tue Nov 23 07:37:53 2021
1473	s14	0.26699414270618266	0.6582773434689968	17	0.4240208506269131	0.20967776679203148	ridge_yeo17_alpha_-2	L2regression	glm7	sc1	sess	True	yeo17	cerebellum_suit	True	4	crossed	False	-2	Tue Nov 23 07:37:55 2021
1474	s06	0.2326470905862625	0.7339921945759682	17	0.4004391360156285	0.3426612681493916	ridge_yeo17_alpha_-2	L2regression	glm7	sc1	sess	True	yeo17	cerebellum_suit	True	4	crossed	False	-2	Tue Nov 23 07:37:56 2021
1475	s22	0.27935392725223224	0.7618730719324341	17	0.4847328485101333	0.4129582653712868	ridge_yeo17_alpha_-2	L2regression	glm7	sc1	sess	True	yeo17	cerebellum_suit	True	4	crossed	False	-2	Tue Nov 23 07:37:58 2021
1476	s21	0.30308471070523085	0.6076812870445685	17	0.5121239656404887	0.05833195250570351	ridge_yeo17_alpha_-2	L2regression	glm7	sc1	sess	True	yeo17	cerebellum_suit	True	4	crossed	False	-2	Tue Nov 23 07:37:59 2021
1477	s08	0.3280891879527977	0.6361727582468278	17	0.4780029914221887	0.2268113874432068	ridge_yeo17_alpha_0	L2regression	glm7	sc1	sess	True	yeo17	cerebellum_suit	True	4	crossed	False	0	Tue Nov 23 07:38:00 2021
1478	s26	0.2688581796090708	0.6653849792480573	17	0.407307590736578	0.25601439040958396	ridge_yeo17_alpha_0	L2regression	glm7	sc1	sess	True	yeo17	cerebellum_suit	True	4	crossed	False	0	Tue Nov 23 07:38:02 2021
1479	s04	0.2601893136492709	0.6436550335312704	17	0.42749143340836543	0.14398575114619866	ridge_yeo17_alpha_0	L2regression	glm7	sc1	sess	True	yeo17	cerebellum_suit	True	4	crossed	False	0	Tue Nov 23 07:38:03 2021
1480	s14	0.27193468935715803	0.6435663009709053	17	0.4013155622001072	0.23514745596787984	ridge_yeo17_alpha_0	L2regression	glm7	sc1	sess	True	yeo17	cerebellum_suit	True	4	crossed	False	0	Tue Nov 23 07:38:04 2021
1481	s06	0.2346105410016873	0.7293788985857591	17	0.382034807777498	0.36301936103410415	ridge_yeo17_alpha_0	L2regression	glm7	sc1	sess	True	yeo17	cerebellum_suit	True	4	crossed	False	0	Tue Nov 23 07:38:06 2021
1482	s22	0.28141453863043336	0.7581851653438497	17	0.4648263004258363	0.4317187684453271	ridge_yeo17_alpha_0	L2regression	glm7	sc1	sess	True	yeo17	cerebellum_suit	True	4	crossed	False	0	Tue Nov 23 07:38:07 2021
1483	s21	0.3054698043456678	0.6012210379939619	17	0.4856158101834872	0.06411006142771923	ridge_yeo17_alpha_0	L2regression	glm7	sc1	sess	True	yeo17	cerebellum_suit	True	4	crossed	False	0	Tue Nov 23 07:38:08 2021
1484	s08	0.3475549927413141	0.5851162141821941	17	0.4556366331146247	0.22466969689536145	ridge_yeo17_alpha_2	L2regression	glm7	sc1	sess	True	yeo17	cerebellum_suit	True	4	crossed	False	2	Tue Nov 23 07:38:10 2021
1485	s26	0.28090257826155784	0.6340258923933649	17	0.3834424350387464	0.26650938632218424	ridge_yeo17_alpha_2	L2regression	glm7	sc1	sess	True	yeo17	cerebellum_suit	True	4	crossed	False	2	Tue Nov 23 07:38:11 2021
1486	s04	0.2728131208512433	0.6055176412722736	17	0.3896211655422888	0.19521779547928053	ridge_yeo17_alpha_2	L2regression	glm7	sc1	sess	True	yeo17	cerebellum_suit	True	4	crossed	False	2	Tue Nov 23 07:38:12 2021
1487	s14	0.28403505021947656	0.6055936604333132	17	0.3753119271707698	0.270920187483207	ridge_yeo17_alpha_2	L2regression	glm7	sc1	sess	True	yeo17	cerebellum_suit	True	4	crossed	False	2	Tue Nov 23 07:38:13 2021
1488	s06	0.2459741643047034	0.6998129717526385	17	0.3551906607293278	0.3928612556498856	ridge_yeo17_alpha_2	L2regression	glm7	sc1	sess	True	yeo17	cerebellum_suit	True	4	crossed	False	2	Tue Nov 23 07:38:15 2021
1489	s22	0.29319640611932074	0.7358958045570685	17	0.43324181329969225	0.4635024560538684	ridge_yeo17_alpha_2	L2regression	glm7	sc1	sess	True	yeo17	cerebellum_suit	True	4	crossed	False	2	Tue Nov 23 07:38:16 2021
1490	s21	0.3179103358506669	0.5644166023642024	17	0.4464672815177085	0.07457204709465508	ridge_yeo17_alpha_2	L2regression	glm7	sc1	sess	True	yeo17	cerebellum_suit	True	4	crossed	False	2	Tue Nov 23 07:38:17 2021
1491	s08	0.3766786867143735	0.5011992841692464	17	0.4411280510650304	0.2031178020378475	ridge_yeo17_alpha_4	L2regression	glm7	sc1	sess	True	yeo17	cerebellum_suit	True	4	crossed	False	4	Tue Nov 23 07:38:19 2021
1492	s26	0.30638456001549363	0.5626224892605461	17	0.3705320383096535	0.2569033867486449	ridge_yeo17_alpha_4	L2regression	glm7	sc1	sess	True	yeo17	cerebellum_suit	True	4	crossed	False	4	Tue Nov 23 07:38:20 2021
1493	s04	0.2954902232148802	0.5237653618949148	17	0.3660666844341416	0.2234290708960595	ridge_yeo17_alpha_4	L2regression	glm7	sc1	sess	True	yeo17	cerebellum_suit	True	4	crossed	False	4	Tue Nov 23 07:38:21 2021
1494	s14	0.3039465050012629	0.5377724135019772	17	0.3590272616832053	0.299046663152361	ridge_yeo17_alpha_4	L2regression	glm7	sc1	sess	True	yeo17	cerebellum_suit	True	4	crossed	False	4	Tue Nov 23 07:38:22 2021
1495	s06	0.26722748451031336	0.6453533965324111	17	0.3375025505702003	0.4034266269987696	ridge_yeo17_alpha_4	L2regression	glm7	sc1	sess	True	yeo17	cerebellum_suit	True	4	crossed	False	4	Tue Nov 23 07:38:24 2021
1496	s22	0.3203034372723293	0.6864948552183889	17	0.413504803353177	0.4788043244555991	ridge_yeo17_alpha_4	L2regression	glm7	sc1	sess	True	yeo17	cerebellum_suit	True	4	crossed	False	4	Tue Nov 23 07:38:25 2021
1497	s21	0.3413494826446153	0.4920704189129551	17	0.4163697703492111	0.06523007049525578	ridge_yeo17_alpha_4	L2regression	glm7	sc1	sess	True	yeo17	cerebellum_suit	True	4	crossed	False	4	Tue Nov 23 07:38:26 2021
1498	s08	0.4049598590321932	0.3754324346331949	17	0.44108465871139135	0.14072613926041774	ridge_yeo17_alpha_6	L2regression	glm7	sc1	sess	True	yeo17	cerebellum_suit	True	4	crossed	False	6	Tue Nov 23 07:38:27 2021
1499	s26	0.33596348465422515	0.4583845451343994	17	0.3732543068639725	0.2240873657373627	ridge_yeo17_alpha_6	L2regression	glm7	sc1	sess	True	yeo17	cerebellum_suit	True	4	crossed	False	6	Tue Nov 23 07:38:29 2021
1500	s04	0.3177034848393595	0.4007239714941948	17	0.3658299088995054	0.1951361761443476	ridge_yeo17_alpha_6	L2regression	glm7	sc1	sess	True	yeo17	cerebellum_suit	True	4	crossed	False	6	Tue Nov 23 07:38:30 2021
1501	s14	0.3272053323261155	0.4275563553466645	17	0.36129447711890783	0.28136703151696435	ridge_yeo17_alpha_6	L2regression	glm7	sc1	sess	True	yeo17	cerebellum_suit	True	4	crossed	False	6	Tue Nov 23 07:38:31 2021
1502	s06	0.2988145318944502	0.5802171416254354	17	0.34728865976796114	0.3734616540011349	ridge_yeo17_alpha_6	L2regression	glm7	sc1	sess	True	yeo17	cerebellum_suit	True	4	crossed	False	6	Tue Nov 23 07:38:33 2021
1503	s22	0.3624813287900585	0.6229743325953409	17	0.4344366647660469	0.4513086934975992	ridge_yeo17_alpha_6	L2regression	glm7	sc1	sess	True	yeo17	cerebellum_suit	True	4	crossed	False	6	Tue Nov 23 07:38:34 2021
1504	s21	0.3662146236586	0.3756097136156139	17	0.4085442047340299	0.015207869382287268	ridge_yeo17_alpha_6	L2regression	glm7	sc1	sess	True	yeo17	cerebellum_suit	True	4	crossed	False	6	Tue Nov 23 07:38:35 2021
1505	s08	0.417699481129815	0.26858311306978233	17	0.4413231966280817	0.0945238143176864	ridge_yeo17_alpha_8	L2regression	glm7	sc1	sess	True	yeo17	cerebellum_suit	True	4	crossed	False	8	Tue Nov 23 07:38:36 2021
1506	s26	0.35175987543645154	0.3628990213016539	17	0.3792009954771058	0.1933437858532908	ridge_yeo17_alpha_8	L2regression	glm7	sc1	sess	True	yeo17	cerebellum_suit	True	4	crossed	False	8	Tue Nov 23 07:38:38 2021
1507	s04	0.32997146908345176	0.31333130413501864	17	0.3702090947056951	0.16265178905090452	ridge_yeo17_alpha_8	L2regression	glm7	sc1	sess	True	yeo17	cerebellum_suit	True	4	crossed	False	8	Tue Nov 23 07:38:39 2021
1508	s14	0.3431631704846933	0.3543081660268112	17	0.369894294618671	0.2568935982806869	ridge_yeo17_alpha_8	L2regression	glm7	sc1	sess	True	yeo17	cerebellum_suit	True	4	crossed	False	8	Tue Nov 23 07:38:40 2021
1509	s06	0.321810968734763	0.5258814866728455	17	0.3623762578547428	0.33811652709886336	ridge_yeo17_alpha_8	L2regression	glm7	sc1	sess	True	yeo17	cerebellum_suit	True	4	crossed	False	8	Tue Nov 23 07:38:42 2021
1510	s22	0.3921153910587504	0.5626793892385942	17	0.4597323374010044	0.41015826250061416	ridge_yeo17_alpha_8	L2regression	glm7	sc1	sess	True	yeo17	cerebellum_suit	True	4	crossed	False	8	Tue Nov 23 07:38:43 2021
1511	s21	0.37762512986591457	0.2789471253288445	17	0.4064976786860213	-0.01216486102544978	ridge_yeo17_alpha_8	L2regression	glm7	sc1	sess	True	yeo17	cerebellum_suit	True	4	crossed	False	8	Tue Nov 23 07:38:44 2021
1512	s08	0.42115358498378297	0.2449001516930077	17	0.4416105088066468	0.08514289659512432	ridge_yeo17_alpha_10	L2regression	glm7	sc1	sess	True	yeo17	cerebellum_suit	True	4	crossed	False	10	Tue Nov 23 07:38:45 2021
1513	s26	0.3559024414731021	0.33795655640203065	17	0.3811963208553889	0.18581663829671544	ridge_yeo17_alpha_10	L2regression	glm7	sc1	sess	True	yeo17	cerebellum_suit	True	4	crossed	False	10	Tue Nov 23 07:38:46 2021
1514	s04	0.3341727526684103	0.2941640716335225	17	0.3722378598626798	0.1555308808762549	ridge_yeo17_alpha_10	L2regression	glm7	sc1	sess	True	yeo17	cerebellum_suit	True	4	crossed	False	10	Tue Nov 23 07:38:48 2021
1515	s14	0.3497113789309318	0.3390390881219513	17	0.3741216504239844	0.2516554281554492	ridge_yeo17_alpha_10	L2regression	glm7	sc1	sess	True	yeo17	cerebellum_suit	True	4	crossed	False	10	Tue Nov 23 07:38:49 2021
1516	s06	0.3278027667896698	0.5094333619061198	17	0.3663350087189844	0.32843677523035303	ridge_yeo17_alpha_10	L2regression	glm7	sc1	sess	True	yeo17	cerebellum_suit	True	4	crossed	False	10	Tue Nov 23 07:38:50 2021
1517	s22	0.3997563049492895	0.5439684657015713	17	0.466092949933463	0.3986126570482469	ridge_yeo17_alpha_10	L2regression	glm7	sc1	sess	True	yeo17	cerebellum_suit	True	4	crossed	False	10	Tue Nov 23 07:38:52 2021
1518	s21	0.3805675740710847	0.2568252103243909	17	0.40614236352020655	-0.017015548460462566	ridge_yeo17_alpha_10	L2regression	glm7	sc1	sess	True	yeo17	cerebellum_suit	True	4	crossed	False	10	Tue Nov 23 07:38:53 2021
1519	s08	0.3693158395210871	0.4888856231969099	7	0.4629224694679784	0.1982523672840293	ridge_yeo7_alpha_-2	L2regression	glm7	sc1	sess	True	yeo7	cerebellum_suit	True	4	crossed	False	-2	Tue Nov 23 07:36:35 2021
1520	s26	0.3126130534623977	0.4966299574923022	7	0.3963395967656749	0.208905529800622	ridge_yeo7_alpha_-2	L2regression	glm7	sc1	sess	True	yeo7	cerebellum_suit	True	4	crossed	False	-2	Tue Nov 23 07:36:36 2021
1521	s04	0.29657156548831715	0.4802892651033092	7	0.3952104280366428	0.1835843818978588	ridge_yeo7_alpha_-2	L2regression	glm7	sc1	sess	True	yeo7	cerebellum_suit	True	4	crossed	False	-2	Tue Nov 23 07:36:38 2021
1522	s14	0.30198294768428163	0.5223080760712012	7	0.3768963452180367	0.2755977531534518	ridge_yeo7_alpha_-2	L2regression	glm7	sc1	sess	True	yeo7	cerebellum_suit	True	4	crossed	False	-2	Tue Nov 23 07:36:39 2021
1523	s06	0.26922611415507625	0.6149716497028992	7	0.35966423932355085	0.3784700204343345	ridge_yeo7_alpha_-2	L2regression	glm7	sc1	sess	True	yeo7	cerebellum_suit	True	4	crossed	False	-2	Tue Nov 23 07:36:41 2021
1524	s22	0.32771070384944856	0.6439798481719934	7	0.4435680595243571	0.4414995657578467	ridge_yeo7_alpha_-2	L2regression	glm7	sc1	sess	True	yeo7	cerebellum_suit	True	4	crossed	False	-2	Tue Nov 23 07:36:42 2021
1525	s21	0.3455322309108763	0.4221617490731043	7	0.4562200313888325	0.02781008902152049	ridge_yeo7_alpha_-2	L2regression	glm7	sc1	sess	True	yeo7	cerebellum_suit	True	4	crossed	False	-2	Tue Nov 23 07:36:44 2021
1526	s08	0.3708245845281136	0.4842933550862602	7	0.4572246559313443	0.1957272263449384	ridge_yeo7_alpha_0	L2regression	glm7	sc1	sess	True	yeo7	cerebellum_suit	True	4	crossed	False	0	Tue Nov 23 07:36:45 2021
1527	s26	0.3127305939315112	0.4962919782898093	7	0.3921140759853195	0.2138768229753466	ridge_yeo7_alpha_0	L2regression	glm7	sc1	sess	True	yeo7	cerebellum_suit	True	4	crossed	False	0	Tue Nov 23 07:36:46 2021
1528	s04	0.2971015936301495	0.4781082196208744	7	0.388802227663318	0.18993258779923866	ridge_yeo7_alpha_0	L2regression	glm7	sc1	sess	True	yeo7	cerebellum_suit	True	4	crossed	False	0	Tue Nov 23 07:36:48 2021
1529	s14	0.3024552717112152	0.5206522947206631	7	0.3710518164654285	0.28656787041334275	ridge_yeo7_alpha_0	L2regression	glm7	sc1	sess	True	yeo7	cerebellum_suit	True	4	crossed	False	0	Tue Nov 23 07:36:49 2021
1530	s06	0.2694656562291214	0.614237935613975	7	0.35441654824724056	0.3856334294199069	ridge_yeo7_alpha_0	L2regression	glm7	sc1	sess	True	yeo7	cerebellum_suit	True	4	crossed	False	0	Tue Nov 23 07:36:50 2021
1531	s22	0.3278047345660249	0.6438121136823017	7	0.4394015840910411	0.4457608900720935	ridge_yeo7_alpha_0	L2regression	glm7	sc1	sess	True	yeo7	cerebellum_suit	True	4	crossed	False	0	Tue Nov 23 07:36:52 2021
1532	s21	0.34563158674235805	0.4219520196760023	7	0.4509137831974577	0.026679499965252842	ridge_yeo7_alpha_0	L2regression	glm7	sc1	sess	True	yeo7	cerebellum_suit	True	4	crossed	False	0	Tue Nov 23 07:36:53 2021
1533	s08	0.3801208643010364	0.4509320639001674	7	0.4479816497409833	0.18741201209212244	ridge_yeo7_alpha_2	L2regression	glm7	sc1	sess	True	yeo7	cerebellum_suit	True	4	crossed	False	2	Tue Nov 23 07:36:54 2021
1534	s26	0.3150148135013302	0.4900091791474226	7	0.3796906001212833	0.2283723297304261	ridge_yeo7_alpha_2	L2regression	glm7	sc1	sess	True	yeo7	cerebellum_suit	True	4	crossed	False	2	Tue Nov 23 07:36:56 2021
1535	s04	0.30115921317868216	0.4608426632125661	7	0.3746801606988068	0.2023035171556631	ridge_yeo7_alpha_2	L2regression	glm7	sc1	sess	True	yeo7	cerebellum_suit	True	4	crossed	False	2	Tue Nov 23 07:36:57 2021
1536	s14	0.3069168273416436	0.5042897482927989	7	0.36069049732871866	0.3051867183241392	ridge_yeo7_alpha_2	L2regression	glm7	sc1	sess	True	yeo7	cerebellum_suit	True	4	crossed	False	2	Tue Nov 23 07:36:58 2021
1537	s06	0.2727109156727273	0.6046199722442458	7	0.3441173086419382	0.3933468428292719	ridge_yeo7_alpha_2	L2regression	glm7	sc1	sess	True	yeo7	cerebellum_suit	True	4	crossed	False	2	Tue Nov 23 07:37:00 2021
1538	s22	0.33006735586532665	0.6399493344272814	7	0.424512195695268	0.4595261969165799	ridge_yeo7_alpha_2	L2regression	glm7	sc1	sess	True	yeo7	cerebellum_suit	True	4	crossed	False	2	Tue Nov 23 07:37:01 2021
1539	s21	0.3481062311245408	0.4157406884098931	7	0.4324018610223244	0.020032389232601887	ridge_yeo7_alpha_2	L2regression	glm7	sc1	sess	True	yeo7	cerebellum_suit	True	4	crossed	False	2	Tue Nov 23 07:37:02 2021
1540	s08	0.3970758957455317	0.3900428563780127	7	0.4411601732402491	0.16128475696925482	ridge_yeo7_alpha_4	L2regression	glm7	sc1	sess	True	yeo7	cerebellum_suit	True	4	crossed	False	4	Tue Nov 23 07:37:04 2021
1541	s26	0.3276230577240382	0.4565253838834888	7	0.37167611762979297	0.2284830810865011	ridge_yeo7_alpha_4	L2regression	glm7	sc1	sess	True	yeo7	cerebellum_suit	True	4	crossed	False	4	Tue Nov 23 07:37:05 2021
1542	s04	0.3119744722174152	0.41119063344941	7	0.365821870893565	0.2020913856573454	ridge_yeo7_alpha_4	L2regression	glm7	sc1	sess	True	yeo7	cerebellum_suit	True	4	crossed	False	4	Tue Nov 23 07:37:06 2021
1543	s14	0.3198135585151989	0.4522048161160832	7	0.357466419866364	0.3042140460582484	ridge_yeo7_alpha_4	L2regression	glm7	sc1	sess	True	yeo7	cerebellum_suit	True	4	crossed	False	4	Tue Nov 23 07:37:07 2021
1544	s06	0.28648094516288103	0.5737512530661589	7	0.3403660648114939	0.3778371499101084	ridge_yeo7_alpha_4	L2regression	glm7	sc1	sess	True	yeo7	cerebellum_suit	True	4	crossed	False	4	Tue Nov 23 07:37:09 2021
1545	s22	0.3462726146673486	0.6167313805558751	7	0.4183356604971201	0.461802717575688	ridge_yeo7_alpha_4	L2regression	glm7	sc1	sess	True	yeo7	cerebellum_suit	True	4	crossed	False	4	Tue Nov 23 07:37:10 2021
1546	s21	0.3607138478409512	0.3699161874056937	7	0.4146778471631474	-0.004454700028779554	ridge_yeo7_alpha_4	L2regression	glm7	sc1	sess	True	yeo7	cerebellum_suit	True	4	crossed	False	4	Tue Nov 23 07:37:11 2021
1547	s08	0.4132719048385262	0.2789489227123745	7	0.441230176355454	0.10632892818660447	ridge_yeo7_alpha_6	L2regression	glm7	sc1	sess	True	yeo7	cerebellum_suit	True	4	crossed	False	6	Tue Nov 23 07:37:13 2021
1548	s26	0.34616909323439304	0.3667570587012193	7	0.3765846095051322	0.1948434549696648	ridge_yeo7_alpha_6	L2regression	glm7	sc1	sess	True	yeo7	cerebellum_suit	True	4	crossed	False	6	Tue Nov 23 07:37:14 2021
1549	s04	0.32505446134775395	0.3242274664496091	7	0.36803788206938426	0.16977004802384554	ridge_yeo7_alpha_6	L2regression	glm7	sc1	sess	True	yeo7	cerebellum_suit	True	4	crossed	False	6	Tue Nov 23 07:37:15 2021
1550	s14	0.3359704640614994	0.3619999583286024	7	0.3647939322222828	0.2652107457689791	ridge_yeo7_alpha_6	L2regression	glm7	sc1	sess	True	yeo7	cerebellum_suit	True	4	crossed	False	6	Tue Nov 23 07:37:16 2021
1551	s06	0.3121612258196518	0.5288799065296254	7	0.3555995197687978	0.3391146012908093	ridge_yeo7_alpha_6	L2regression	glm7	sc1	sess	True	yeo7	cerebellum_suit	True	4	crossed	False	6	Tue Nov 23 07:37:18 2021
1552	s22	0.3793853094398181	0.5642588342775455	7	0.4473248052092061	0.42215725892330297	ridge_yeo7_alpha_6	L2regression	glm7	sc1	sess	True	yeo7	cerebellum_suit	True	4	crossed	False	6	Tue Nov 23 07:37:19 2021
1553	s21	0.374211434927843	0.27291283262555105	7	0.4084746887020568	-0.03398814830492722	ridge_yeo7_alpha_6	L2regression	glm7	sc1	sess	True	yeo7	cerebellum_suit	True	4	crossed	False	6	Tue Nov 23 07:37:20 2021
1554	s08	0.41990180703169616	0.22952678039782104	7	0.4413976472517795	0.0852265840178509	ridge_yeo7_alpha_8	L2regression	glm7	sc1	sess	True	yeo7	cerebellum_suit	True	4	crossed	False	8	Tue Nov 23 07:37:22 2021
1555	s26	0.35449953124988354	0.3109515819878866	7	0.38046289829669344	0.17531015693695687	ridge_yeo7_alpha_8	L2regression	glm7	sc1	sess	True	yeo7	cerebellum_suit	True	4	crossed	False	8	Tue Nov 23 07:37:23 2021
1556	s04	0.33257467208855185	0.2837294600334148	7	0.3714104729632911	0.15317802051539034	ridge_yeo7_alpha_8	L2regression	glm7	sc1	sess	True	yeo7	cerebellum_suit	True	4	crossed	False	8	Tue Nov 23 07:37:24 2021
1557	s14	0.3470176640625368	0.3274207483442039	7	0.3722635592402185	0.2504689968734121	ridge_yeo7_alpha_8	L2regression	glm7	sc1	sess	True	yeo7	cerebellum_suit	True	4	crossed	False	8	Tue Nov 23 07:37:25 2021
1558	s06	0.3257012169834905	0.4987463557501065	7	0.3649270577693856	0.3161392895778959	ridge_yeo7_alpha_8	L2regression	glm7	sc1	sess	True	yeo7	cerebellum_suit	True	4	crossed	False	8	Tue Nov 23 07:37:27 2021
1559	s22	0.3968950895172358	0.5271415806538404	7	0.4635520286955943	0.3949081092429766	ridge_yeo7_alpha_8	L2regression	glm7	sc1	sess	True	yeo7	cerebellum_suit	True	4	crossed	False	8	Tue Nov 23 07:37:28 2021
1560	s21	0.3796587781973703	0.2266960017891105	7	0.4064382853593533	-0.04161194527162747	ridge_yeo7_alpha_8	L2regression	glm7	sc1	sess	True	yeo7	cerebellum_suit	True	4	crossed	False	8	Tue Nov 23 07:37:29 2021
1561	s08	0.4215492611045287	0.2212000728155508	7	0.4416513368149852	0.08182715190556758	ridge_yeo7_alpha_10	L2regression	glm7	sc1	sess	True	yeo7	cerebellum_suit	True	4	crossed	False	10	Tue Nov 23 07:37:31 2021
1562	s26	0.35636254762696795	0.30026437926721744	7	0.38141880770990105	0.17170095171401975	ridge_yeo7_alpha_10	L2regression	glm7	sc1	sess	True	yeo7	cerebellum_suit	True	4	crossed	False	10	Tue Nov 23 07:37:32 2021
1563	s04	0.33467626958153995	0.2765764731014969	7	0.3724820762680318	0.15029464718461666	ridge_yeo7_alpha_10	L2regression	glm7	sc1	sess	True	yeo7	cerebellum_suit	True	4	crossed	False	10	Tue Nov 23 07:37:33 2021
1564	s14	0.3504982683850376	0.32173107907359233	7	0.3746065260863397	0.2481027809370853	ridge_yeo7_alpha_10	L2regression	glm7	sc1	sess	True	yeo7	cerebellum_suit	True	4	crossed	False	10	Tue Nov 23 07:37:34 2021
1565	s06	0.3284277256885518	0.4919259282520554	7	0.3667393661330756	0.31152226041508085	ridge_yeo7_alpha_10	L2regression	glm7	sc1	sess	True	yeo7	cerebellum_suit	True	4	crossed	False	10	Tue Nov 23 07:37:35 2021
1566	s22	0.4005248289013186	0.5189371425583189	7	0.4666961135059592	0.3894223648591693	ridge_yeo7_alpha_10	L2regression	glm7	sc1	sess	True	yeo7	cerebellum_suit	True	4	crossed	False	10	Tue Nov 23 07:37:37 2021
1567	s21	0.3809124979722714	0.2186645259680169	7	0.4061435237667339	-0.0427214380242348	ridge_yeo7_alpha_10	L2regression	glm7	sc1	sess	True	yeo7	cerebellum_suit	True	4	crossed	False	10	Tue Nov 23 07:37:38 2021
0	s02	0.2489592915549915	0.7196626473317004	17	0.4229643629757959	0.3094080700784235	ridge_mdtb4002_wb_indv_17_alpha_-2	L2regression	glm7	sc1	sess	True	mdtb4002_wb_indv_17	cerebellum_suit	True	4	crossed	False	-2	Tue Jul 13 10:56:38 2021
1	s03	0.2753714608358892	0.7472250120714036	17	0.4869809529663896	0.38533100910897455	ridge_mdtb4002_wb_indv_17_alpha_-2	L2regression	glm7	sc1	sess	True	mdtb4002_wb_indv_17	cerebellum_suit	True	4	crossed	False	-2	Tue Jul 13 10:56:40 2021
2	s09	0.24359753070634105	0.7167848071649899	17	0.3932237571208275	0.35794516165500034	ridge_mdtb4002_wb_indv_17_alpha_-2	L2regression	glm7	sc1	sess	True	mdtb4002_wb_indv_17	cerebellum_suit	True	4	crossed	False	-2	Tue Jul 13 10:56:42 2021
3	s10	0.26253624547107784	0.7477443605376003	17	0.4332844370534333	0.3910281757084902	ridge_mdtb4002_wb_indv_17_alpha_-2	L2regression	glm7	sc1	sess	True	mdtb4002_wb_indv_17	cerebellum_suit	True	4	crossed	False	-2	Tue Jul 13 10:56:44 2021
4	s12	0.2751185096622423	0.6841629278400105	17	0.4593289966452132	0.2669763058836866	ridge_mdtb4002_wb_indv_17_alpha_-2	L2regression	glm7	sc1	sess	True	mdtb4002_wb_indv_17	cerebellum_suit	True	4	crossed	False	-2	Tue Jul 13 10:56:46 2021
5	s15	0.2727456014471468	0.6831663878071149	17	0.491097076318913	0.17887818762629032	ridge_mdtb4002_wb_indv_17_alpha_-2	L2regression	glm7	sc1	sess	True	mdtb4002_wb_indv_17	cerebellum_suit	True	4	crossed	False	-2	Tue Jul 13 10:56:49 2021
6	s17	0.2708741854682623	0.7453402920740185	17	0.4681015720442423	0.3853963753876673	ridge_mdtb4002_wb_indv_17_alpha_-2	L2regression	glm7	sc1	sess	True	mdtb4002_wb_indv_17	cerebellum_suit	True	4	crossed	False	-2	Tue Jul 13 10:56:51 2021
7	s18	0.22558074266507966	0.6678968420883004	17	0.3941984830715399	0.1611754372392948	ridge_mdtb4002_wb_indv_17_alpha_-2	L2regression	glm7	sc1	sess	True	mdtb4002_wb_indv_17	cerebellum_suit	True	4	crossed	False	-2	Tue Jul 13 10:56:53 2021
8	s19	0.20772879266544267	0.7033934907288529	17	0.3245394629846175	0.3618139622905852	ridge_mdtb4002_wb_indv_17_alpha_-2	L2regression	glm7	sc1	sess	True	mdtb4002_wb_indv_17	cerebellum_suit	True	4	crossed	False	-2	Tue Jul 13 10:56:56 2021
9	s20	0.2483532911345314	0.7065241487026475	17	0.404472860629528	0.3296731482912518	ridge_mdtb4002_wb_indv_17_alpha_-2	L2regression	glm7	sc1	sess	True	mdtb4002_wb_indv_17	cerebellum_suit	True	4	crossed	False	-2	Tue Jul 13 10:56:58 2021
10	s24	0.2739910970710577	0.6854266348653716	17	0.4890465700211877	0.1979086296768954	ridge_mdtb4002_wb_indv_17_alpha_-2	L2regression	glm7	sc1	sess	True	mdtb4002_wb_indv_17	cerebellum_suit	True	4	crossed	False	-2	Tue Jul 13 10:57:00 2021
11	s25	0.2736058612896234	0.6796488876179428	17	0.478926105495471	0.17637355366694313	ridge_mdtb4002_wb_indv_17_alpha_-2	L2regression	glm7	sc1	sess	True	mdtb4002_wb_indv_17	cerebellum_suit	True	4	crossed	False	-2	Tue Jul 13 10:57:02 2021
12	s27	0.24683161265315925	0.7118822029992002	17	0.4459556972996058	0.25563760947646536	ridge_mdtb4002_wb_indv_17_alpha_-2	L2regression	glm7	sc1	sess	True	mdtb4002_wb_indv_17	cerebellum_suit	True	4	crossed	False	-2	Tue Jul 13 10:57:04 2021
13	s28	0.2594643867218882	0.6481406335937263	17	0.43311150890186784	0.19400771154535887	ridge_mdtb4002_wb_indv_17_alpha_-2	L2regression	glm7	sc1	sess	True	mdtb4002_wb_indv_17	cerebellum_suit	True	4	crossed	False	-2	Tue Jul 13 10:57:05 2021
14	s29	0.3606653970314492	0.6573518167429093	17	0.6621088105873365	0.16762555152866587	ridge_mdtb4002_wb_indv_17_alpha_-2	L2regression	glm7	sc1	sess	True	mdtb4002_wb_indv_17	cerebellum_suit	True	4	crossed	False	-2	Tue Jul 13 10:57:08 2021
15	s30	0.30155538880167343	0.6755105691832629	17	0.5586865694371974	0.12942047993414535	ridge_mdtb4002_wb_indv_17_alpha_-2	L2regression	glm7	sc1	sess	True	mdtb4002_wb_indv_17	cerebellum_suit	True	4	crossed	False	-2	Tue Jul 13 10:57:09 2021
16	s31	0.2596472360313697	0.628242337828357	17	0.4622743045461773	0.14237773716501548	ridge_mdtb4002_wb_indv_17_alpha_-2	L2regression	glm7	sc1	sess	True	mdtb4002_wb_indv_17	cerebellum_suit	True	4	crossed	False	-2	Tue Jul 13 10:57:13 2021
17	s02	0.2503775022649471	0.7162951596680949	17	0.4100800408216076	0.3170019002394178	ridge_mdtb4002_wb_indv_17_alpha_0	L2regression	glm7	sc1	sess	True	mdtb4002_wb_indv_17	cerebellum_suit	True	4	crossed	False	0	Tue Jul 13 10:57:16 2021
18	s03	0.2790965941324925	0.7401833457734668	17	0.4665365538889217	0.399672271367244	ridge_mdtb4002_wb_indv_17_alpha_0	L2regression	glm7	sc1	sess	True	mdtb4002_wb_indv_17	cerebellum_suit	True	4	crossed	False	0	Tue Jul 13 10:57:18 2021
19	s09	0.2466086705428096	0.7092756789545764	17	0.3748357033038524	0.3762248210129084	ridge_mdtb4002_wb_indv_17_alpha_0	L2regression	glm7	sc1	sess	True	mdtb4002_wb_indv_17	cerebellum_suit	True	4	crossed	False	0	Tue Jul 13 10:57:20 2021
20	s10	0.2644113901731128	0.7441956307819609	17	0.4167785379962312	0.4074627132419675	ridge_mdtb4002_wb_indv_17_alpha_0	L2regression	glm7	sc1	sess	True	mdtb4002_wb_indv_17	cerebellum_suit	True	4	crossed	False	0	Tue Jul 13 10:57:22 2021
21	s12	0.27670080902408195	0.6805153360469292	17	0.4372894709978932	0.2872418073657253	ridge_mdtb4002_wb_indv_17_alpha_0	L2regression	glm7	sc1	sess	True	mdtb4002_wb_indv_17	cerebellum_suit	True	4	crossed	False	0	Tue Jul 13 10:57:24 2021
22	s15	0.2746784338834678	0.6785049540386473	17	0.4708292149235981	0.18476840712437376	ridge_mdtb4002_wb_indv_17_alpha_0	L2regression	glm7	sc1	sess	True	mdtb4002_wb_indv_17	cerebellum_suit	True	4	crossed	False	0	Tue Jul 13 10:57:27 2021
23	s17	0.2723519536876816	0.7423855419784631	17	0.452142842603803	0.40065317949141205	ridge_mdtb4002_wb_indv_17_alpha_0	L2regression	glm7	sc1	sess	True	mdtb4002_wb_indv_17	cerebellum_suit	True	4	crossed	False	0	Tue Jul 13 10:57:29 2021
24	s18	0.2262719928943252	0.6661209182818084	17	0.3738562151455068	0.17512505920585794	ridge_mdtb4002_wb_indv_17_alpha_0	L2regression	glm7	sc1	sess	True	mdtb4002_wb_indv_17	cerebellum_suit	True	4	crossed	False	0	Tue Jul 13 10:57:31 2021
25	s19	0.20881337140603973	0.700673232486403	17	0.31399035266391423	0.3697190141135647	ridge_mdtb4002_wb_indv_17_alpha_0	L2regression	glm7	sc1	sess	True	mdtb4002_wb_indv_17	cerebellum_suit	True	4	crossed	False	0	Tue Jul 13 10:57:33 2021
26	s20	0.25099025554038523	0.6994363735573562	17	0.3895524138882439	0.33563096029926776	ridge_mdtb4002_wb_indv_17_alpha_0	L2regression	glm7	sc1	sess	True	mdtb4002_wb_indv_17	cerebellum_suit	True	4	crossed	False	0	Tue Jul 13 10:57:36 2021
27	s24	0.2756466904679594	0.6816621104786234	17	0.4596293155773978	0.2231683267393784	ridge_mdtb4002_wb_indv_17_alpha_0	L2regression	glm7	sc1	sess	True	mdtb4002_wb_indv_17	cerebellum_suit	True	4	crossed	False	0	Tue Jul 13 10:57:38 2021
28	s25	0.2753188289038443	0.6757068602551511	17	0.4578827191497106	0.18776263983452368	ridge_mdtb4002_wb_indv_17_alpha_0	L2regression	glm7	sc1	sess	True	mdtb4002_wb_indv_17	cerebellum_suit	True	4	crossed	False	0	Tue Jul 13 10:57:40 2021
29	s27	0.25036205397238903	0.7032448088256755	17	0.42568685825495817	0.2662359301037006	ridge_mdtb4002_wb_indv_17_alpha_0	L2regression	glm7	sc1	sess	True	mdtb4002_wb_indv_17	cerebellum_suit	True	4	crossed	False	0	Tue Jul 13 10:57:42 2021
30	s28	0.2600807713604471	0.6466180895429223	17	0.4135297989729759	0.2072827812480712	ridge_mdtb4002_wb_indv_17_alpha_0	L2regression	glm7	sc1	sess	True	mdtb4002_wb_indv_17	cerebellum_suit	True	4	crossed	False	0	Tue Jul 13 10:57:44 2021
31	s29	0.3623625071455397	0.6546106912012571	17	0.6238544881627999	0.17578574379731216	ridge_mdtb4002_wb_indv_17_alpha_0	L2regression	glm7	sc1	sess	True	mdtb4002_wb_indv_17	cerebellum_suit	True	4	crossed	False	0	Tue Jul 13 10:57:46 2021
32	s30	0.3027936321788776	0.6730320607460277	17	0.5341225771436761	0.1328920092038164	ridge_mdtb4002_wb_indv_17_alpha_0	L2regression	glm7	sc1	sess	True	mdtb4002_wb_indv_17	cerebellum_suit	True	4	crossed	False	0	Tue Jul 13 10:57:47 2021
33	s31	0.2609146080035862	0.6243028985446124	17	0.4390629385540369	0.14196256596707718	ridge_mdtb4002_wb_indv_17_alpha_0	L2regression	glm7	sc1	sess	True	mdtb4002_wb_indv_17	cerebellum_suit	True	4	crossed	False	0	Tue Jul 13 10:57:50 2021
34	s02	0.25995203645075404	0.6928540680462681	17	0.3826106241211853	0.3385861342212576	ridge_mdtb4002_wb_indv_17_alpha_2	L2regression	glm7	sc1	sess	True	mdtb4002_wb_indv_17	cerebellum_suit	True	4	crossed	False	2	Tue Jul 13 10:57:54 2021
35	s03	0.29408182213994605	0.7098444192228128	17	0.4348428487837707	0.4245168378192883	ridge_mdtb4002_wb_indv_17_alpha_2	L2regression	glm7	sc1	sess	True	mdtb4002_wb_indv_17	cerebellum_suit	True	4	crossed	False	2	Tue Jul 13 10:57:58 2021
36	s09	0.2586911341572469	0.6775090879692429	17	0.35086205354831995	0.4039080169635381	ridge_mdtb4002_wb_indv_17_alpha_2	L2regression	glm7	sc1	sess	True	mdtb4002_wb_indv_17	cerebellum_suit	True	4	crossed	False	2	Tue Jul 13 10:58:00 2021
37	s10	0.2774543337115659	0.7178332564742328	17	0.3916826658302136	0.42881548273347736	ridge_mdtb4002_wb_indv_17_alpha_2	L2regression	glm7	sc1	sess	True	mdtb4002_wb_indv_17	cerebellum_suit	True	4	crossed	False	2	Tue Jul 13 10:58:03 2021
38	s12	0.28658328578245085	0.6570722750163844	17	0.4044047800902532	0.3157120693437101	ridge_mdtb4002_wb_indv_17_alpha_2	L2regression	glm7	sc1	sess	True	mdtb4002_wb_indv_17	cerebellum_suit	True	4	crossed	False	2	Tue Jul 13 10:58:05 2021
39	s15	0.28514359429831104	0.6536825806262337	17	0.4299011940595309	0.20100777428094949	ridge_mdtb4002_wb_indv_17_alpha_2	L2regression	glm7	sc1	sess	True	mdtb4002_wb_indv_17	cerebellum_suit	True	4	crossed	False	2	Tue Jul 13 10:58:07 2021
40	s17	0.28211110422228897	0.7225945998030513	17	0.4232078748787424	0.4297133319312839	ridge_mdtb4002_wb_indv_17_alpha_2	L2regression	glm7	sc1	sess	True	mdtb4002_wb_indv_17	cerebellum_suit	True	4	crossed	False	2	Tue Jul 13 10:58:09 2021
41	s18	0.2342592352806459	0.6433552940490108	17	0.3380321254873567	0.1999362533061944	ridge_mdtb4002_wb_indv_17_alpha_2	L2regression	glm7	sc1	sess	True	mdtb4002_wb_indv_17	cerebellum_suit	True	4	crossed	False	2	Tue Jul 13 10:58:12 2021
42	s19	0.21866812745870576	0.6725415937183812	17	0.3016595820186363	0.3597555482414282	ridge_mdtb4002_wb_indv_17_alpha_2	L2regression	glm7	sc1	sess	True	mdtb4002_wb_indv_17	cerebellum_suit	True	4	crossed	False	2	Tue Jul 13 10:58:13 2021
43	s20	0.26330551006505354	0.6636072205613555	17	0.36409801927676144	0.3609359640149847	ridge_mdtb4002_wb_indv_17_alpha_2	L2regression	glm7	sc1	sess	True	mdtb4002_wb_indv_17	cerebellum_suit	True	4	crossed	False	2	Tue Jul 13 10:58:15 2021
44	s24	0.2866826743643667	0.6552548943957239	17	0.4143854049249759	0.27476889205787786	ridge_mdtb4002_wb_indv_17_alpha_2	L2regression	glm7	sc1	sess	True	mdtb4002_wb_indv_17	cerebellum_suit	True	4	crossed	False	2	Tue Jul 13 10:58:19 2021
45	s25	0.2869660770701979	0.6466917934401261	17	0.42196764986728014	0.2103781588338285	ridge_mdtb4002_wb_indv_17_alpha_2	L2regression	glm7	sc1	sess	True	mdtb4002_wb_indv_17	cerebellum_suit	True	4	crossed	False	2	Tue Jul 13 10:58:20 2021
46	s27	0.26474360069106545	0.6663515149535141	17	0.3974820723407525	0.27281223958569617	ridge_mdtb4002_wb_indv_17_alpha_2	L2regression	glm7	sc1	sess	True	mdtb4002_wb_indv_17	cerebellum_suit	True	4	crossed	False	2	Tue Jul 13 10:58:22 2021
47	s28	0.2673912486666015	0.6270016731799671	17	0.3789595907432256	0.23667020692555585	ridge_mdtb4002_wb_indv_17_alpha_2	L2regression	glm7	sc1	sess	True	mdtb4002_wb_indv_17	cerebellum_suit	True	4	crossed	False	2	Tue Jul 13 10:58:24 2021
48	s29	0.378381136654595	0.6245167231643622	17	0.5703682965117927	0.18082696932778725	ridge_mdtb4002_wb_indv_17_alpha_2	L2regression	glm7	sc1	sess	True	mdtb4002_wb_indv_17	cerebellum_suit	True	4	crossed	False	2	Tue Jul 13 10:58:27 2021
49	s30	0.31477426735420816	0.6453564647674817	17	0.490747308280957	0.1470548230259112	ridge_mdtb4002_wb_indv_17_alpha_2	L2regression	glm7	sc1	sess	True	mdtb4002_wb_indv_17	cerebellum_suit	True	4	crossed	False	2	Tue Jul 13 10:58:29 2021
50	s31	0.26995059647822944	0.5932282483632942	17	0.4008201934516158	0.1391252658869648	ridge_mdtb4002_wb_indv_17_alpha_2	L2regression	glm7	sc1	sess	True	mdtb4002_wb_indv_17	cerebellum_suit	True	4	crossed	False	2	Tue Jul 13 10:58:32 2021
51	s02	0.28347599990532	0.6357947377646489	17	0.3596452532664909	0.35426301713768993	ridge_mdtb4002_wb_indv_17_alpha_4	L2regression	glm7	sc1	sess	True	mdtb4002_wb_indv_17	cerebellum_suit	True	4	crossed	False	4	Tue Jul 13 10:58:41 2021
52	s03	0.32118895515051593	0.6574242850222265	17	0.4151727786454517	0.4328872778904697	ridge_mdtb4002_wb_indv_17_alpha_4	L2regression	glm7	sc1	sess	True	mdtb4002_wb_indv_17	cerebellum_suit	True	4	crossed	False	4	Tue Jul 13 10:58:45 2021
53	s09	0.2819500985932292	0.613086139821981	17	0.3402548200960935	0.41436307697454017	ridge_mdtb4002_wb_indv_17_alpha_4	L2regression	glm7	sc1	sess	True	mdtb4002_wb_indv_17	cerebellum_suit	True	4	crossed	False	4	Tue Jul 13 10:58:47 2021
54	s10	0.30787725187616144	0.6516783512166597	17	0.37852516996006935	0.42705478853791706	ridge_mdtb4002_wb_indv_17_alpha_4	L2regression	glm7	sc1	sess	True	mdtb4002_wb_indv_17	cerebellum_suit	True	4	crossed	False	4	Tue Jul 13 10:58:50 2021
55	s12	0.31106701184909946	0.5959458502831738	17	0.3848697553857727	0.3211631625985137	ridge_mdtb4002_wb_indv_17_alpha_4	L2regression	glm7	sc1	sess	True	mdtb4002_wb_indv_17	cerebellum_suit	True	4	crossed	False	4	Tue Jul 13 10:58:52 2021
56	s15	0.3124802489310966	0.5922375775338756	17	0.3971412280130751	0.2033824016869088	ridge_mdtb4002_wb_indv_17_alpha_4	L2regression	glm7	sc1	sess	True	mdtb4002_wb_indv_17	cerebellum_suit	True	4	crossed	False	4	Tue Jul 13 10:58:54 2021
57	s17	0.3065921198774294	0.6787428846420063	17	0.3997657820600068	0.4488687112282443	ridge_mdtb4002_wb_indv_17_alpha_4	L2regression	glm7	sc1	sess	True	mdtb4002_wb_indv_17	cerebellum_suit	True	4	crossed	False	4	Tue Jul 13 10:58:57 2021
58	s18	0.25658770197116243	0.5732150531815321	17	0.3168387275522068	0.19736339610878245	ridge_mdtb4002_wb_indv_17_alpha_4	L2regression	glm7	sc1	sess	True	mdtb4002_wb_indv_17	cerebellum_suit	True	4	crossed	False	4	Tue Jul 13 10:58:59 2021
59	s19	0.24188648082846334	0.5915497526029578	17	0.29395274068618404	0.3383545742810965	ridge_mdtb4002_wb_indv_17_alpha_4	L2regression	glm7	sc1	sess	True	mdtb4002_wb_indv_17	cerebellum_suit	True	4	crossed	False	4	Tue Jul 13 10:59:01 2021
60	s20	0.28504595141321737	0.5952553444210235	17	0.3453970592604662	0.3929204807185348	ridge_mdtb4002_wb_indv_17_alpha_4	L2regression	glm7	sc1	sess	True	mdtb4002_wb_indv_17	cerebellum_suit	True	4	crossed	False	4	Tue Jul 13 10:59:04 2021
61	s24	0.3125104406712674	0.5895442531219827	17	0.3870815602035157	0.31330966306019103	ridge_mdtb4002_wb_indv_17_alpha_4	L2regression	glm7	sc1	sess	True	mdtb4002_wb_indv_17	cerebellum_suit	True	4	crossed	False	4	Tue Jul 13 10:59:07 2021
62	s25	0.3122642417985889	0.5792386720872442	17	0.3952597200197273	0.2113799939784166	ridge_mdtb4002_wb_indv_17_alpha_4	L2regression	glm7	sc1	sess	True	mdtb4002_wb_indv_17	cerebellum_suit	True	4	crossed	False	4	Tue Jul 13 10:59:08 2021
63	s27	0.2926332575466552	0.5809667240438109	17	0.37220450687980733	0.28207009261196025	ridge_mdtb4002_wb_indv_17_alpha_4	L2regression	glm7	sc1	sess	True	mdtb4002_wb_indv_17	cerebellum_suit	True	4	crossed	False	4	Tue Jul 13 10:59:10 2021
64	s28	0.2889299289866961	0.5676165028188626	17	0.3526274350222097	0.25356527979720794	ridge_mdtb4002_wb_indv_17_alpha_4	L2regression	glm7	sc1	sess	True	mdtb4002_wb_indv_17	cerebellum_suit	True	4	crossed	False	4	Tue Jul 13 10:59:12 2021
65	s29	0.4143266771002784	0.5442569407138537	17	0.5309324293431059	0.16641433863523342	ridge_mdtb4002_wb_indv_17_alpha_4	L2regression	glm7	sc1	sess	True	mdtb4002_wb_indv_17	cerebellum_suit	True	4	crossed	False	4	Tue Jul 13 10:59:14 2021
66	s30	0.3418220380024071	0.5802845318503247	17	0.4512707731596247	0.17136765433332285	ridge_mdtb4002_wb_indv_17_alpha_4	L2regression	glm7	sc1	sess	True	mdtb4002_wb_indv_17	cerebellum_suit	True	4	crossed	False	4	Tue Jul 13 10:59:16 2021
67	s31	0.2884727714668653	0.5335952186793234	17	0.36521227977129145	0.1414944081620232	ridge_mdtb4002_wb_indv_17_alpha_4	L2regression	glm7	sc1	sess	True	mdtb4002_wb_indv_17	cerebellum_suit	True	4	crossed	False	4	Tue Jul 13 10:59:18 2021
68	s02	0.3176373627743237	0.5458994101434697	17	0.3654041577020504	0.3259637332781309	ridge_mdtb4002_wb_indv_17_alpha_6	L2regression	glm7	sc1	sess	True	mdtb4002_wb_indv_17	cerebellum_suit	True	4	crossed	False	6	Tue Jul 13 10:59:20 2021
69	s03	0.3624615119516694	0.5860689858131309	17	0.4300079836745417	0.3980322548486685	ridge_mdtb4002_wb_indv_17_alpha_6	L2regression	glm7	sc1	sess	True	mdtb4002_wb_indv_17	cerebellum_suit	True	4	crossed	False	6	Tue Jul 13 10:59:22 2021
70	s09	0.310317057582464	0.5030111530666154	17	0.3526365804026895	0.3620116112751399	ridge_mdtb4002_wb_indv_17_alpha_6	L2regression	glm7	sc1	sess	True	mdtb4002_wb_indv_17	cerebellum_suit	True	4	crossed	False	6	Tue Jul 13 10:59:24 2021
71	s10	0.3472176001005669	0.5736134664096607	17	0.3952436698926168	0.3786558888907897	ridge_mdtb4002_wb_indv_17_alpha_6	L2regression	glm7	sc1	sess	True	mdtb4002_wb_indv_17	cerebellum_suit	True	4	crossed	False	6	Tue Jul 13 10:59:26 2021
72	s12	0.3438714004803733	0.5084716344127233	17	0.39015625235939133	0.2905855358116701	ridge_mdtb4002_wb_indv_17_alpha_6	L2regression	glm7	sc1	sess	True	mdtb4002_wb_indv_17	cerebellum_suit	True	4	crossed	False	6	Tue Jul 13 10:59:28 2021
73	s15	0.3487994643012937	0.4926203601678809	17	0.3943622970428504	0.16805981276165888	ridge_mdtb4002_wb_indv_17_alpha_6	L2regression	glm7	sc1	sess	True	mdtb4002_wb_indv_17	cerebellum_suit	True	4	crossed	False	6	Tue Jul 13 10:59:31 2021
74	s17	0.35142791486150593	0.6158189274757603	17	0.41428950091399297	0.4295097898025164	ridge_mdtb4002_wb_indv_17_alpha_6	L2regression	glm7	sc1	sess	True	mdtb4002_wb_indv_17	cerebellum_suit	True	4	crossed	False	6	Tue Jul 13 10:59:33 2021
75	s18	0.2830764664743672	0.4585742436781554	17	0.31516798771757065	0.16362708070504187	ridge_mdtb4002_wb_indv_17_alpha_6	L2regression	glm7	sc1	sess	True	mdtb4002_wb_indv_17	cerebellum_suit	True	4	crossed	False	6	Tue Jul 13 10:59:35 2021
76	s19	0.2673731760572926	0.4874719347945437	17	0.3005305030540757	0.2847908742572197	ridge_mdtb4002_wb_indv_17_alpha_6	L2regression	glm7	sc1	sess	True	mdtb4002_wb_indv_17	cerebellum_suit	True	4	crossed	False	6	Tue Jul 13 10:59:37 2021
77	s20	0.31146134607292303	0.4976166776468946	17	0.3508745425687862	0.3814991524793107	ridge_mdtb4002_wb_indv_17_alpha_6	L2regression	glm7	sc1	sess	True	mdtb4002_wb_indv_17	cerebellum_suit	True	4	crossed	False	6	Tue Jul 13 10:59:39 2021
78	s24	0.3448852074496756	0.4735307247325582	17	0.3900989742519727	0.2885369823272512	ridge_mdtb4002_wb_indv_17_alpha_6	L2regression	glm7	sc1	sess	True	mdtb4002_wb_indv_17	cerebellum_suit	True	4	crossed	False	6	Tue Jul 13 10:59:41 2021
79	s25	0.3436818665898926	0.4909368744577982	17	0.3924510525266255	0.1634825814427683	ridge_mdtb4002_wb_indv_17_alpha_6	L2regression	glm7	sc1	sess	True	mdtb4002_wb_indv_17	cerebellum_suit	True	4	crossed	False	6	Tue Jul 13 10:59:42 2021
80	s27	0.3210812700295637	0.4556912597118394	17	0.36909864176659396	0.2732929195647127	ridge_mdtb4002_wb_indv_17_alpha_6	L2regression	glm7	sc1	sess	True	mdtb4002_wb_indv_17	cerebellum_suit	True	4	crossed	False	6	Tue Jul 13 10:59:44 2021
81	s28	0.31748789600636984	0.4678785649882399	17	0.3497983860839709	0.22918817831131744	ridge_mdtb4002_wb_indv_17_alpha_6	L2regression	glm7	sc1	sess	True	mdtb4002_wb_indv_17	cerebellum_suit	True	4	crossed	False	6	Tue Jul 13 10:59:46 2021
82	s29	0.4512627906068046	0.4407303021295524	17	0.5245955375271194	0.12160710919936385	ridge_mdtb4002_wb_indv_17_alpha_6	L2regression	glm7	sc1	sess	True	mdtb4002_wb_indv_17	cerebellum_suit	True	4	crossed	False	6	Tue Jul 13 10:59:48 2021
83	s30	0.3784533671699024	0.5105138305021748	17	0.44183346671948776	0.16536859712358984	ridge_mdtb4002_wb_indv_17_alpha_6	L2regression	glm7	sc1	sess	True	mdtb4002_wb_indv_17	cerebellum_suit	True	4	crossed	False	6	Tue Jul 13 10:59:50 2021
84	s31	0.3139650854793913	0.465055235683576	17	0.3543328509568792	0.12949595455180998	ridge_mdtb4002_wb_indv_17_alpha_6	L2regression	glm7	sc1	sess	True	mdtb4002_wb_indv_17	cerebellum_suit	True	4	crossed	False	6	Tue Jul 13 10:59:52 2021
85	s02	0.34075551566830503	0.4753415839025538	17	0.3780165235915343	0.2928942833777795	ridge_mdtb4002_wb_indv_17_alpha_8	L2regression	glm7	sc1	sess	True	mdtb4002_wb_indv_17	cerebellum_suit	True	4	crossed	False	8	Tue Jul 13 10:59:54 2021
86	s03	0.3898107708308693	0.5186606856420878	17	0.44916704819003583	0.3591110364690392	ridge_mdtb4002_wb_indv_17_alpha_8	L2regression	glm7	sc1	sess	True	mdtb4002_wb_indv_17	cerebellum_suit	True	4	crossed	False	8	Tue Jul 13 10:59:57 2021
87	s09	0.3293812926543025	0.4189221582927489	17	0.367035389241944	0.3169742816621928	ridge_mdtb4002_wb_indv_17_alpha_8	L2regression	glm7	sc1	sess	True	mdtb4002_wb_indv_17	cerebellum_suit	True	4	crossed	False	8	Tue Jul 13 10:59:59 2021
88	s10	0.3719499614345539	0.5060412941758428	17	0.41243030038402745	0.3252642623393419	ridge_mdtb4002_wb_indv_17_alpha_8	L2regression	glm7	sc1	sess	True	mdtb4002_wb_indv_17	cerebellum_suit	True	4	crossed	False	8	Tue Jul 13 11:00:01 2021
89	s12	0.3643763223807724	0.4321119765807741	17	0.400188417247628	0.2552606417492223	ridge_mdtb4002_wb_indv_17_alpha_8	L2regression	glm7	sc1	sess	True	mdtb4002_wb_indv_17	cerebellum_suit	True	4	crossed	False	8	Tue Jul 13 11:00:04 2021
90	s15	0.3672612916841399	0.3961743407703489	17	0.3977986490068874	0.1338210179739173	ridge_mdtb4002_wb_indv_17_alpha_8	L2regression	glm7	sc1	sess	True	mdtb4002_wb_indv_17	cerebellum_suit	True	4	crossed	False	8	Tue Jul 13 11:00:06 2021
91	s17	0.3846284754956787	0.5798664757404098	17	0.436756639190164	0.4104808050837024	ridge_mdtb4002_wb_indv_17_alpha_8	L2regression	glm7	sc1	sess	True	mdtb4002_wb_indv_17	cerebellum_suit	True	4	crossed	False	8	Tue Jul 13 11:00:08 2021
92	s18	0.2964365798225941	0.3736539104171485	17	0.3180728512714778	0.14346050482320716	ridge_mdtb4002_wb_indv_17_alpha_8	L2regression	glm7	sc1	sess	True	mdtb4002_wb_indv_17	cerebellum_suit	True	4	crossed	False	8	Tue Jul 13 11:00:10 2021
93	s19	0.2819933253959256	0.3974488389156854	17	0.3080567777194559	0.23360340377083436	ridge_mdtb4002_wb_indv_17_alpha_8	L2regression	glm7	sc1	sess	True	mdtb4002_wb_indv_17	cerebellum_suit	True	4	crossed	False	8	Tue Jul 13 11:00:12 2021
94	s20	0.3337523336535295	0.4339690015968912	17	0.3664885261117525	0.3597317672201397	ridge_mdtb4002_wb_indv_17_alpha_8	L2regression	glm7	sc1	sess	True	mdtb4002_wb_indv_17	cerebellum_suit	True	4	crossed	False	8	Tue Jul 13 11:00:14 2021
95	s24	0.3650641667149812	0.3915885827854075	17	0.3998998472375195	0.25898957409437795	ridge_mdtb4002_wb_indv_17_alpha_8	L2regression	glm7	sc1	sess	True	mdtb4002_wb_indv_17	cerebellum_suit	True	4	crossed	False	8	Tue Jul 13 11:00:16 2021
96	s25	0.3624111691766214	0.4201506664906729	17	0.3964750098051173	0.11926301031319593	ridge_mdtb4002_wb_indv_17_alpha_8	L2regression	glm7	sc1	sess	True	mdtb4002_wb_indv_17	cerebellum_suit	True	4	crossed	False	8	Tue Jul 13 11:00:18 2021
97	s27	0.338893241712974	0.3765110974803344	17	0.3761768203547219	0.255786608038858	ridge_mdtb4002_wb_indv_17_alpha_8	L2regression	glm7	sc1	sess	True	mdtb4002_wb_indv_17	cerebellum_suit	True	4	crossed	False	8	Tue Jul 13 11:00:21 2021
98	s28	0.3328567357622533	0.3878007113024213	17	0.35495868601336755	0.20149070569007135	ridge_mdtb4002_wb_indv_17_alpha_8	L2regression	glm7	sc1	sess	True	mdtb4002_wb_indv_17	cerebellum_suit	True	4	crossed	False	8	Tue Jul 13 11:00:23 2021
99	s29	0.4691036448325138	0.34499359628994625	17	0.5275088653209261	0.08466022122883506	ridge_mdtb4002_wb_indv_17_alpha_8	L2regression	glm7	sc1	sess	True	mdtb4002_wb_indv_17	cerebellum_suit	True	4	crossed	False	8	Tue Jul 13 11:00:26 2021
100	s30	0.4011325323211561	0.4662697874431605	17	0.44621310834696815	0.14515955365451105	ridge_mdtb4002_wb_indv_17_alpha_8	L2regression	glm7	sc1	sess	True	mdtb4002_wb_indv_17	cerebellum_suit	True	4	crossed	False	8	Tue Jul 13 11:00:27 2021
101	s31	0.3284399554970381	0.4102524138290786	17	0.3558374884221928	0.11469276706227198	ridge_mdtb4002_wb_indv_17_alpha_8	L2regression	glm7	sc1	sess	True	mdtb4002_wb_indv_17	cerebellum_suit	True	4	crossed	False	8	Tue Jul 13 11:00:30 2021
102	s02	0.34720131496316464	0.4572101555844804	17	0.38191115505849216	0.2847485202484784	ridge_mdtb4002_wb_indv_17_alpha_10	L2regression	glm7	sc1	sess	True	mdtb4002_wb_indv_17	cerebellum_suit	True	4	crossed	False	10	Tue Jul 13 11:00:33 2021
103	s03	0.3967761300141816	0.4975362007857717	17	0.4542895532316381	0.34821836313536425	ridge_mdtb4002_wb_indv_17_alpha_10	L2regression	glm7	sc1	sess	True	mdtb4002_wb_indv_17	cerebellum_suit	True	4	crossed	False	10	Tue Jul 13 11:00:35 2021
104	s09	0.3365714732095997	0.3997014082195289	17	0.3726145758883895	0.3075215445261921	ridge_mdtb4002_wb_indv_17_alpha_10	L2regression	glm7	sc1	sess	True	mdtb4002_wb_indv_17	cerebellum_suit	True	4	crossed	False	10	Tue Jul 13 11:00:37 2021
105	s10	0.3781911625883497	0.4847013160315089	17	0.4166948490028359	0.31051894080342946	ridge_mdtb4002_wb_indv_17_alpha_10	L2regression	glm7	sc1	sess	True	mdtb4002_wb_indv_17	cerebellum_suit	True	4	crossed	False	10	Tue Jul 13 11:00:39 2021
106	s12	0.3697859009332681	0.4106313730423004	17	0.4031940157315299	0.2461893500218742	ridge_mdtb4002_wb_indv_17_alpha_10	L2regression	glm7	sc1	sess	True	mdtb4002_wb_indv_17	cerebellum_suit	True	4	crossed	False	10	Tue Jul 13 11:00:41 2021
107	s15	0.3716353452194959	0.3702723356586422	17	0.3989033266835205	0.12557538689111986	ridge_mdtb4002_wb_indv_17_alpha_10	L2regression	glm7	sc1	sess	True	mdtb4002_wb_indv_17	cerebellum_suit	True	4	crossed	False	10	Tue Jul 13 11:00:44 2021
108	s17	0.3929239923072968	0.5716669280817716	17	0.4425154327008157	0.4060362474987776	ridge_mdtb4002_wb_indv_17_alpha_10	L2regression	glm7	sc1	sess	True	mdtb4002_wb_indv_17	cerebellum_suit	True	4	crossed	False	10	Tue Jul 13 11:00:46 2021
109	s18	0.2997617019775746	0.354102370497396	17	0.3191936853047944	0.1393705662574626	ridge_mdtb4002_wb_indv_17_alpha_10	L2regression	glm7	sc1	sess	True	mdtb4002_wb_indv_17	cerebellum_suit	True	4	crossed	False	10	Tue Jul 13 11:00:48 2021
110	s19	0.28594317888266546	0.3740118036444299	17	0.3102319719227493	0.22188970703082656	ridge_mdtb4002_wb_indv_17_alpha_10	L2regression	glm7	sc1	sess	True	mdtb4002_wb_indv_17	cerebellum_suit	True	4	crossed	False	10	Tue Jul 13 11:00:50 2021
111	s20	0.3426926027866757	0.4200918877874423	17	0.3730844488617575	0.35468606540237924	ridge_mdtb4002_wb_indv_17_alpha_10	L2regression	glm7	sc1	sess	True	mdtb4002_wb_indv_17	cerebellum_suit	True	4	crossed	False	10	Tue Jul 13 11:00:52 2021
112	s24	0.37191326278029696	0.3737382473260417	17	0.4040466652433707	0.2525897534657219	ridge_mdtb4002_wb_indv_17_alpha_10	L2regression	glm7	sc1	sess	True	mdtb4002_wb_indv_17	cerebellum_suit	True	4	crossed	False	10	Tue Jul 13 11:00:56 2021
113	s25	0.36716740804018944	0.40024814292259137	17	0.39765622576428944	0.10864489590231603	ridge_mdtb4002_wb_indv_17_alpha_10	L2regression	glm7	sc1	sess	True	mdtb4002_wb_indv_17	cerebellum_suit	True	4	crossed	False	10	Tue Jul 13 11:00:57 2021
114	s27	0.34565259192104897	0.3602496615058433	17	0.3800037521823985	0.25163034480690283	ridge_mdtb4002_wb_indv_17_alpha_10	L2regression	glm7	sc1	sess	True	mdtb4002_wb_indv_17	cerebellum_suit	True	4	crossed	False	10	Tue Jul 13 11:00:59 2021
115	s28	0.3367202453334209	0.3671226402869632	17	0.3567359046555101	0.1945299911580125	ridge_mdtb4002_wb_indv_17_alpha_10	L2regression	glm7	sc1	sess	True	mdtb4002_wb_indv_17	cerebellum_suit	True	4	crossed	False	10	Tue Jul 13 11:01:01 2021
116	s29	0.4733803737226027	0.3181542156259741	17	0.5284980822444373	0.07620522921972682	ridge_mdtb4002_wb_indv_17_alpha_10	L2regression	glm7	sc1	sess	True	mdtb4002_wb_indv_17	cerebellum_suit	True	4	crossed	False	10	Tue Jul 13 11:01:03 2021
117	s30	0.40636878181712205	0.4543157703112092	17	0.447586339041422	0.13961354838378265	ridge_mdtb4002_wb_indv_17_alpha_10	L2regression	glm7	sc1	sess	True	mdtb4002_wb_indv_17	cerebellum_suit	True	4	crossed	False	10	Tue Jul 13 11:01:05 2021
118	s31	0.3316698076091698	0.39478996902913416	17	0.3565717661651146	0.11086395358081376	ridge_mdtb4002_wb_indv_17_alpha_10	L2regression	glm7	sc1	sess	True	mdtb4002_wb_indv_17	cerebellum_suit	True	4	crossed	False	10	Tue Jul 13 11:01:07 2021
119	s02	0.274393094703941	0.6422475979314711	10	0.3828799838353105	0.36459335742336696	ridge_mdtb4002_wb_indv_10_alpha_-2	L2regression	glm7	sc1	sess	True	mdtb4002_wb_indv_10	cerebellum_suit	True	4	crossed	False	-2	Tue Jul 13 10:47:19 2021
120	s03	0.3106031079949927	0.6646447266358902	10	0.4494696338575041	0.402846396881409	ridge_mdtb4002_wb_indv_10_alpha_-2	L2regression	glm7	sc1	sess	True	mdtb4002_wb_indv_10	cerebellum_suit	True	4	crossed	False	-2	Tue Jul 13 10:47:21 2021
121	s09	0.27042484759687074	0.632756131943059	10	0.3669415264453168	0.3767555415635534	ridge_mdtb4002_wb_indv_10_alpha_-2	L2regression	glm7	sc1	sess	True	mdtb4002_wb_indv_10	cerebellum_suit	True	4	crossed	False	-2	Tue Jul 13 10:47:24 2021
122	s10	0.2955420042709572	0.6617409589649204	10	0.4119310463341925	0.4011078085304751	ridge_mdtb4002_wb_indv_10_alpha_-2	L2regression	glm7	sc1	sess	True	mdtb4002_wb_indv_10	cerebellum_suit	True	4	crossed	False	-2	Tue Jul 13 10:47:26 2021
123	s12	0.29901649858966745	0.6112050705926044	10	0.4163357772656816	0.3158622807617054	ridge_mdtb4002_wb_indv_10_alpha_-2	L2regression	glm7	sc1	sess	True	mdtb4002_wb_indv_10	cerebellum_suit	True	4	crossed	False	-2	Tue Jul 13 10:47:28 2021
124	s15	0.3010191788481845	0.5945372564583842	10	0.4348753390058547	0.2311787765627173	ridge_mdtb4002_wb_indv_10_alpha_-2	L2regression	glm7	sc1	sess	True	mdtb4002_wb_indv_10	cerebellum_suit	True	4	crossed	False	-2	Tue Jul 13 10:47:30 2021
125	s17	0.2963418137111181	0.6844343115169574	10	0.43608695669716296	0.4199703174302396	ridge_mdtb4002_wb_indv_10_alpha_-2	L2regression	glm7	sc1	sess	True	mdtb4002_wb_indv_10	cerebellum_suit	True	4	crossed	False	-2	Tue Jul 13 10:47:32 2021
126	s18	0.25477561215258704	0.5383102621521981	10	0.3488241010666811	0.19161237513052812	ridge_mdtb4002_wb_indv_10_alpha_-2	L2regression	glm7	sc1	sess	True	mdtb4002_wb_indv_10	cerebellum_suit	True	4	crossed	False	-2	Tue Jul 13 10:47:34 2021
127	s19	0.23400691948699226	0.5974473762642812	10	0.3189768186191228	0.32491602279533466	ridge_mdtb4002_wb_indv_10_alpha_-2	L2regression	glm7	sc1	sess	True	mdtb4002_wb_indv_10	cerebellum_suit	True	4	crossed	False	-2	Tue Jul 13 10:47:36 2021
128	s20	0.27736276201732823	0.6047693843638674	10	0.3815095042806604	0.3246217969442858	ridge_mdtb4002_wb_indv_10_alpha_-2	L2regression	glm7	sc1	sess	True	mdtb4002_wb_indv_10	cerebellum_suit	True	4	crossed	False	-2	Tue Jul 13 10:47:39 2021
129	s24	0.30283805543049785	0.5962102574683383	10	0.4298981476404452	0.26230300776458265	ridge_mdtb4002_wb_indv_10_alpha_-2	L2regression	glm7	sc1	sess	True	mdtb4002_wb_indv_10	cerebellum_suit	True	4	crossed	False	-2	Tue Jul 13 10:47:43 2021
130	s25	0.3032284569548177	0.5815300008179629	10	0.4349660178125332	0.2120129506697638	ridge_mdtb4002_wb_indv_10_alpha_-2	L2regression	glm7	sc1	sess	True	mdtb4002_wb_indv_10	cerebellum_suit	True	4	crossed	False	-2	Tue Jul 13 10:47:44 2021
131	s27	0.2794534844229963	0.6038568712912729	10	0.4115148958624894	0.26585736087277306	ridge_mdtb4002_wb_indv_10_alpha_-2	L2regression	glm7	sc1	sess	True	mdtb4002_wb_indv_10	cerebellum_suit	True	4	crossed	False	-2	Tue Jul 13 10:47:46 2021
132	s28	0.2822695399811465	0.5598832097192329	10	0.3895381884375249	0.2413831609571623	ridge_mdtb4002_wb_indv_10_alpha_-2	L2regression	glm7	sc1	sess	True	mdtb4002_wb_indv_10	cerebellum_suit	True	4	crossed	False	-2	Tue Jul 13 10:47:48 2021
133	s29	0.4018109854277621	0.5424802645690247	10	0.6058527426145324	0.17560926341218205	ridge_mdtb4002_wb_indv_10_alpha_-2	L2regression	glm7	sc1	sess	True	mdtb4002_wb_indv_10	cerebellum_suit	True	4	crossed	False	-2	Tue Jul 13 10:47:50 2021
134	s30	0.3406886463433505	0.5485455942097779	10	0.5032131697525236	0.14918959823928332	ridge_mdtb4002_wb_indv_10_alpha_-2	L2regression	glm7	sc1	sess	True	mdtb4002_wb_indv_10	cerebellum_suit	True	4	crossed	False	-2	Tue Jul 13 10:47:52 2021
135	s31	0.285056290268997	0.5164060454197843	10	0.41649468705421655	0.11816144676954185	ridge_mdtb4002_wb_indv_10_alpha_-2	L2regression	glm7	sc1	sess	True	mdtb4002_wb_indv_10	cerebellum_suit	True	4	crossed	False	-2	Tue Jul 13 10:47:54 2021
136	s02	0.2746566000170583	0.6415533354474589	10	0.3783207851283689	0.3675853796410155	ridge_mdtb4002_wb_indv_10_alpha_0	L2regression	glm7	sc1	sess	True	mdtb4002_wb_indv_10	cerebellum_suit	True	4	crossed	False	0	Tue Jul 13 10:47:56 2021
137	s03	0.3114613725964213	0.6625124930907494	10	0.4399099840658528	0.4146171388883689	ridge_mdtb4002_wb_indv_10_alpha_0	L2regression	glm7	sc1	sess	True	mdtb4002_wb_indv_10	cerebellum_suit	True	4	crossed	False	0	Tue Jul 13 10:47:59 2021
138	s09	0.2707982434993672	0.6317296892255658	10	0.35982315562784456	0.3870853116602863	ridge_mdtb4002_wb_indv_10_alpha_0	L2regression	glm7	sc1	sess	True	mdtb4002_wb_indv_10	cerebellum_suit	True	4	crossed	False	0	Tue Jul 13 10:48:00 2021
139	s10	0.2958369465125763	0.66110657661288	10	0.40519645156098943	0.4079892971432196	ridge_mdtb4002_wb_indv_10_alpha_0	L2regression	glm7	sc1	sess	True	mdtb4002_wb_indv_10	cerebellum_suit	True	4	crossed	False	0	Tue Jul 13 10:48:02 2021
140	s12	0.29930998337726944	0.610493635079173	10	0.4095961451518559	0.3202324754921497	ridge_mdtb4002_wb_indv_10_alpha_0	L2regression	glm7	sc1	sess	True	mdtb4002_wb_indv_10	cerebellum_suit	True	4	crossed	False	0	Tue Jul 13 10:48:04 2021
141	s15	0.301174452262161	0.5942585299062207	10	0.4280575252119079	0.233255666670276	ridge_mdtb4002_wb_indv_10_alpha_0	L2regression	glm7	sc1	sess	True	mdtb4002_wb_indv_10	cerebellum_suit	True	4	crossed	False	0	Tue Jul 13 10:48:07 2021
142	s17	0.29648667000990764	0.6841817072459033	10	0.4304820668394508	0.4256641255578252	ridge_mdtb4002_wb_indv_10_alpha_0	L2regression	glm7	sc1	sess	True	mdtb4002_wb_indv_10	cerebellum_suit	True	4	crossed	False	0	Tue Jul 13 10:48:09 2021
143	s18	0.2548597889691459	0.5380616023495174	10	0.3436506899282043	0.19609592395500536	ridge_mdtb4002_wb_indv_10_alpha_0	L2regression	glm7	sc1	sess	True	mdtb4002_wb_indv_10	cerebellum_suit	True	4	crossed	False	0	Tue Jul 13 10:48:11 2021
144	s19	0.2341154194743356	0.5971782910420355	10	0.3147027904428585	0.32850729910483034	ridge_mdtb4002_wb_indv_10_alpha_0	L2regression	glm7	sc1	sess	True	mdtb4002_wb_indv_10	cerebellum_suit	True	4	crossed	False	0	Tue Jul 13 10:48:14 2021
145	s20	0.2777587497193917	0.603595836341413	10	0.3738095735058694	0.3371314483321136	ridge_mdtb4002_wb_indv_10_alpha_0	L2regression	glm7	sc1	sess	True	mdtb4002_wb_indv_10	cerebellum_suit	True	4	crossed	False	0	Tue Jul 13 10:48:18 2021
146	s24	0.3034103374919441	0.5946823997816011	10	0.4210665931788216	0.2694515113599131	ridge_mdtb4002_wb_indv_10_alpha_0	L2regression	glm7	sc1	sess	True	mdtb4002_wb_indv_10	cerebellum_suit	True	4	crossed	False	0	Tue Jul 13 10:48:21 2021
147	s25	0.3037276500740481	0.5800134727101932	10	0.4280561431045489	0.21451548978165366	ridge_mdtb4002_wb_indv_10_alpha_0	L2regression	glm7	sc1	sess	True	mdtb4002_wb_indv_10	cerebellum_suit	True	4	crossed	False	0	Tue Jul 13 10:48:22 2021
148	s27	0.2799621196786913	0.6026055478469461	10	0.4031940209584409	0.26998013957092937	ridge_mdtb4002_wb_indv_10_alpha_0	L2regression	glm7	sc1	sess	True	mdtb4002_wb_indv_10	cerebellum_suit	True	4	crossed	False	0	Tue Jul 13 10:48:24 2021
149	s28	0.282342754240741	0.5597255129670355	10	0.38469317241951184	0.2456691626373626	ridge_mdtb4002_wb_indv_10_alpha_0	L2regression	glm7	sc1	sess	True	mdtb4002_wb_indv_10	cerebellum_suit	True	4	crossed	False	0	Tue Jul 13 10:48:27 2021
150	s29	0.40249760689647496	0.5408896243826764	10	0.5937990541371603	0.1745493464713714	ridge_mdtb4002_wb_indv_10_alpha_0	L2regression	glm7	sc1	sess	True	mdtb4002_wb_indv_10	cerebellum_suit	True	4	crossed	False	0	Tue Jul 13 10:48:29 2021
151	s30	0.34079405686749603	0.5483051514107976	10	0.4967940769221604	0.1526127151629778	ridge_mdtb4002_wb_indv_10_alpha_0	L2regression	glm7	sc1	sess	True	mdtb4002_wb_indv_10	cerebellum_suit	True	4	crossed	False	0	Tue Jul 13 10:48:31 2021
152	s31	0.28512753404137664	0.516216719925327	10	0.4102289280122208	0.12040620737301655	ridge_mdtb4002_wb_indv_10_alpha_0	L2regression	glm7	sc1	sess	True	mdtb4002_wb_indv_10	cerebellum_suit	True	4	crossed	False	0	Tue Jul 13 10:48:33 2021
153	s02	0.2783454651693953	0.6323848206648972	10	0.3651310500973367	0.3739598546084579	ridge_mdtb4002_wb_indv_10_alpha_2	L2regression	glm7	sc1	sess	True	mdtb4002_wb_indv_10	cerebellum_suit	True	4	crossed	False	2	Tue Jul 13 10:48:35 2021
154	s03	0.31809797962944525	0.6466701521275331	10	0.4256159492072463	0.4259399440088609	ridge_mdtb4002_wb_indv_10_alpha_2	L2regression	glm7	sc1	sess	True	mdtb4002_wb_indv_10	cerebellum_suit	True	4	crossed	False	2	Tue Jul 13 10:48:37 2021
155	s09	0.2755246994132304	0.6189051737542636	10	0.3458181365596266	0.4063391870426765	ridge_mdtb4002_wb_indv_10_alpha_2	L2regression	glm7	sc1	sess	True	mdtb4002_wb_indv_10	cerebellum_suit	True	4	crossed	False	2	Tue Jul 13 10:48:40 2021
156	s10	0.3002707200615237	0.6518997200472142	10	0.3878481108645502	0.4231802314667364	ridge_mdtb4002_wb_indv_10_alpha_2	L2regression	glm7	sc1	sess	True	mdtb4002_wb_indv_10	cerebellum_suit	True	4	crossed	False	2	Tue Jul 13 10:48:42 2021
157	s12	0.30403704345503146	0.5984763697447122	10	0.39366227875643306	0.32717078281588474	ridge_mdtb4002_wb_indv_10_alpha_2	L2regression	glm7	sc1	sess	True	mdtb4002_wb_indv_10	cerebellum_suit	True	4	crossed	False	2	Tue Jul 13 10:48:44 2021
158	s15	0.3050264285378507	0.5867516894307306	10	0.4065899386156441	0.2368242889672775	ridge_mdtb4002_wb_indv_10_alpha_2	L2regression	glm7	sc1	sess	True	mdtb4002_wb_indv_10	cerebellum_suit	True	4	crossed	False	2	Tue Jul 13 10:48:47 2021
159	s17	0.29980288063251465	0.6784803571534139	10	0.4121400026840495	0.44204310695971616	ridge_mdtb4002_wb_indv_10_alpha_2	L2regression	glm7	sc1	sess	True	mdtb4002_wb_indv_10	cerebellum_suit	True	4	crossed	False	2	Tue Jul 13 10:48:49 2021
160	s18	0.2567809687994765	0.5325637230347969	10	0.32742023686606897	0.2081713425661423	ridge_mdtb4002_wb_indv_10_alpha_2	L2regression	glm7	sc1	sess	True	mdtb4002_wb_indv_10	cerebellum_suit	True	4	crossed	False	2	Tue Jul 13 10:48:52 2021
161	s19	0.2368614983597581	0.5895528972824114	10	0.3011592327760332	0.3397026408202775	ridge_mdtb4002_wb_indv_10_alpha_2	L2regression	glm7	sc1	sess	True	mdtb4002_wb_indv_10	cerebellum_suit	True	4	crossed	False	2	Tue Jul 13 10:48:57 2021
162	s20	0.2818655526717833	0.5910617640054371	10	0.355776023110747	0.369427946129702	ridge_mdtb4002_wb_indv_10_alpha_2	L2regression	glm7	sc1	sess	True	mdtb4002_wb_indv_10	cerebellum_suit	True	4	crossed	False	2	Tue Jul 13 10:48:59 2021
163	s24	0.3089034352206993	0.5802956232791446	10	0.40016513451244606	0.29022110699388165	ridge_mdtb4002_wb_indv_10_alpha_2	L2regression	glm7	sc1	sess	True	mdtb4002_wb_indv_10	cerebellum_suit	True	4	crossed	False	2	Tue Jul 13 10:49:01 2021
164	s25	0.30806270658453955	0.5680317640510693	10	0.4105370849049638	0.2161546416214844	ridge_mdtb4002_wb_indv_10_alpha_2	L2regression	glm7	sc1	sess	True	mdtb4002_wb_indv_10	cerebellum_suit	True	4	crossed	False	2	Tue Jul 13 10:49:03 2021
165	s27	0.2867658934979271	0.5832133012037286	10	0.384026919707144	0.2782805012548022	ridge_mdtb4002_wb_indv_10_alpha_2	L2regression	glm7	sc1	sess	True	mdtb4002_wb_indv_10	cerebellum_suit	True	4	crossed	False	2	Tue Jul 13 10:49:05 2021
166	s28	0.2844069360696456	0.5550225983731816	10	0.366436919600536	0.2623166384799338	ridge_mdtb4002_wb_indv_10_alpha_2	L2regression	glm7	sc1	sess	True	mdtb4002_wb_indv_10	cerebellum_suit	True	4	crossed	False	2	Tue Jul 13 10:49:08 2021
167	s29	0.4094458671872399	0.5242806593914271	10	0.5621995626922673	0.16999074266026715	ridge_mdtb4002_wb_indv_10_alpha_2	L2regression	glm7	sc1	sess	True	mdtb4002_wb_indv_10	cerebellum_suit	True	4	crossed	False	2	Tue Jul 13 10:49:10 2021
168	s30	0.34329147461602444	0.5424758913887889	10	0.473913677520024	0.1653847441476847	ridge_mdtb4002_wb_indv_10_alpha_2	L2regression	glm7	sc1	sess	True	mdtb4002_wb_indv_10	cerebellum_suit	True	4	crossed	False	2	Tue Jul 13 10:49:12 2021
169	s31	0.2870073354016087	0.5108812473229826	10	0.38717648954098416	0.12864826115125613	ridge_mdtb4002_wb_indv_10_alpha_2	L2regression	glm7	sc1	sess	True	mdtb4002_wb_indv_10	cerebellum_suit	True	4	crossed	False	2	Tue Jul 13 10:49:14 2021
170	s02	0.2957121256594916	0.5924432662377278	10	0.3563296160578236	0.36563157136389945	ridge_mdtb4002_wb_indv_10_alpha_4	L2regression	glm7	sc1	sess	True	mdtb4002_wb_indv_10	cerebellum_suit	True	4	crossed	False	4	Tue Jul 13 10:49:19 2021
171	s03	0.3380154073279341	0.6076802316471563	10	0.4187276582472417	0.4131120705408036	ridge_mdtb4002_wb_indv_10_alpha_4	L2regression	glm7	sc1	sess	True	mdtb4002_wb_indv_10	cerebellum_suit	True	4	crossed	False	4	Tue Jul 13 10:49:21 2021
172	s09	0.2931904215075037	0.5658490677922832	10	0.3429240976447065	0.3996266042614881	ridge_mdtb4002_wb_indv_10_alpha_4	L2regression	glm7	sc1	sess	True	mdtb4002_wb_indv_10	cerebellum_suit	True	4	crossed	False	4	Tue Jul 13 10:49:23 2021
173	s10	0.3207137095476934	0.6166034294600952	10	0.3804964177303285	0.4156659126546066	ridge_mdtb4002_wb_indv_10_alpha_4	L2regression	glm7	sc1	sess	True	mdtb4002_wb_indv_10	cerebellum_suit	True	4	crossed	False	4	Tue Jul 13 10:49:24 2021
174	s12	0.32287561317642643	0.5510178439703262	10	0.3835208885261032	0.3225248619316368	ridge_mdtb4002_wb_indv_10_alpha_4	L2regression	glm7	sc1	sess	True	mdtb4002_wb_indv_10	cerebellum_suit	True	4	crossed	False	4	Tue Jul 13 10:49:27 2021
175	s15	0.3266338619424544	0.5414016162162357	10	0.391873258331444	0.21261412587113404	ridge_mdtb4002_wb_indv_10_alpha_4	L2regression	glm7	sc1	sess	True	mdtb4002_wb_indv_10	cerebellum_suit	True	4	crossed	False	4	Tue Jul 13 10:49:29 2021
176	s17	0.3209376850455096	0.6434921625790283	10	0.3994005795519644	0.4453477074950829	ridge_mdtb4002_wb_indv_10_alpha_4	L2regression	glm7	sc1	sess	True	mdtb4002_wb_indv_10	cerebellum_suit	True	4	crossed	False	4	Tue Jul 13 10:49:31 2021
177	s18	0.26896628250568105	0.496242958712741	10	0.31429678778847225	0.2000099404820323	ridge_mdtb4002_wb_indv_10_alpha_4	L2regression	glm7	sc1	sess	True	mdtb4002_wb_indv_10	cerebellum_suit	True	4	crossed	False	4	Tue Jul 13 10:49:33 2021
178	s19	0.25198941782771306	0.5389659273821612	10	0.2942106472887842	0.3312943591681745	ridge_mdtb4002_wb_indv_10_alpha_4	L2regression	glm7	sc1	sess	True	mdtb4002_wb_indv_10	cerebellum_suit	True	4	crossed	False	4	Tue Jul 13 10:49:35 2021
179	s20	0.2958688079120665	0.5447410603776971	10	0.3449599880130864	0.3926901494271559	ridge_mdtb4002_wb_indv_10_alpha_4	L2regression	glm7	sc1	sess	True	mdtb4002_wb_indv_10	cerebellum_suit	True	4	crossed	False	4	Tue Jul 13 10:49:38 2021
180	s24	0.3278116026114485	0.5247045017285322	10	0.38729910303523707	0.3027628361161309	ridge_mdtb4002_wb_indv_10_alpha_4	L2regression	glm7	sc1	sess	True	mdtb4002_wb_indv_10	cerebellum_suit	True	4	crossed	False	4	Tue Jul 13 10:49:40 2021
181	s25	0.3248638379145598	0.5253421887439714	10	0.3935910992306549	0.19555463137346768	ridge_mdtb4002_wb_indv_10_alpha_4	L2regression	glm7	sc1	sess	True	mdtb4002_wb_indv_10	cerebellum_suit	True	4	crossed	False	4	Tue Jul 13 10:49:42 2021
182	s27	0.306159541752552	0.5147125679741443	10	0.3683471936355269	0.2836643041633454	ridge_mdtb4002_wb_indv_10_alpha_4	L2regression	glm7	sc1	sess	True	mdtb4002_wb_indv_10	cerebellum_suit	True	4	crossed	False	4	Tue Jul 13 10:49:44 2021
183	s28	0.29894390810692445	0.5168960693853835	10	0.34758774976573553	0.2745395328951742	ridge_mdtb4002_wb_indv_10_alpha_4	L2regression	glm7	sc1	sess	True	mdtb4002_wb_indv_10	cerebellum_suit	True	4	crossed	False	4	Tue Jul 13 10:49:46 2021
184	s29	0.4300694253779414	0.4785211816912476	10	0.528339782516406	0.1551685678091418	ridge_mdtb4002_wb_indv_10_alpha_4	L2regression	glm7	sc1	sess	True	mdtb4002_wb_indv_10	cerebellum_suit	True	4	crossed	False	4	Tue Jul 13 10:49:49 2021
185	s30	0.3581225795597349	0.5118238879583092	10	0.44547781580386775	0.17936877723825712	ridge_mdtb4002_wb_indv_10_alpha_4	L2regression	glm7	sc1	sess	True	mdtb4002_wb_indv_10	cerebellum_suit	True	4	crossed	False	4	Tue Jul 13 10:49:50 2021
186	s31	0.2990575638978188	0.4766284845415586	10	0.3606352308613368	0.1341940832057158	ridge_mdtb4002_wb_indv_10_alpha_4	L2regression	glm7	sc1	sess	True	mdtb4002_wb_indv_10	cerebellum_suit	True	4	crossed	False	4	Tue Jul 13 10:49:53 2021
187	s02	0.3259401565218893	0.5164270147871366	10	0.3688373904595871	0.3242867614104558	ridge_mdtb4002_wb_indv_10_alpha_6	L2regression	glm7	sc1	sess	True	mdtb4002_wb_indv_10	cerebellum_suit	True	4	crossed	False	6	Tue Jul 13 10:49:55 2021
188	s03	0.3719641082339415	0.5480404421772737	10	0.4357303244078277	0.3791504074589184	ridge_mdtb4002_wb_indv_10_alpha_6	L2regression	glm7	sc1	sess	True	mdtb4002_wb_indv_10	cerebellum_suit	True	4	crossed	False	6	Tue Jul 13 10:49:57 2021
189	s09	0.31674589268680803	0.4686528296545388	10	0.3566911608978077	0.34679477033854866	ridge_mdtb4002_wb_indv_10_alpha_6	L2regression	glm7	sc1	sess	True	mdtb4002_wb_indv_10	cerebellum_suit	True	4	crossed	False	6	Tue Jul 13 10:49:59 2021
190	s10	0.3565820729044329	0.5439830141466133	10	0.4021989872013555	0.3498665700378554	ridge_mdtb4002_wb_indv_10_alpha_6	L2regression	glm7	sc1	sess	True	mdtb4002_wb_indv_10	cerebellum_suit	True	4	crossed	False	6	Tue Jul 13 10:50:01 2021
191	s12	0.351128318439254	0.4754013840538046	10	0.3926347118152824	0.2874354234995322	ridge_mdtb4002_wb_indv_10_alpha_6	L2regression	glm7	sc1	sess	True	mdtb4002_wb_indv_10	cerebellum_suit	True	4	crossed	False	6	Tue Jul 13 10:50:03 2021
192	s15	0.35640475945470923	0.44656140852427295	10	0.3954936174577196	0.15545180515338078	ridge_mdtb4002_wb_indv_10_alpha_6	L2regression	glm7	sc1	sess	True	mdtb4002_wb_indv_10	cerebellum_suit	True	4	crossed	False	6	Tue Jul 13 10:50:06 2021
193	s17	0.3625252431864297	0.5882096202822433	10	0.4207237725658329	0.4199410467392892	ridge_mdtb4002_wb_indv_10_alpha_6	L2regression	glm7	sc1	sess	True	mdtb4002_wb_indv_10	cerebellum_suit	True	4	crossed	False	6	Tue Jul 13 10:50:08 2021
194	s18	0.28834783769107114	0.4078469737215976	10	0.3155948087450176	0.16452183127746686	ridge_mdtb4002_wb_indv_10_alpha_6	L2regression	glm7	sc1	sess	True	mdtb4002_wb_indv_10	cerebellum_suit	True	4	crossed	False	6	Tue Jul 13 10:50:10 2021
195	s19	0.2729688014618733	0.4414636562406911	10	0.30279831507743826	0.2696062066712533	ridge_mdtb4002_wb_indv_10_alpha_6	L2regression	glm7	sc1	sess	True	mdtb4002_wb_indv_10	cerebellum_suit	True	4	crossed	False	6	Tue Jul 13 10:50:13 2021
196	s20	0.3182539850727559	0.4731915121198088	10	0.3547675883568598	0.3771529504833832	ridge_mdtb4002_wb_indv_10_alpha_6	L2regression	glm7	sc1	sess	True	mdtb4002_wb_indv_10	cerebellum_suit	True	4	crossed	False	6	Tue Jul 13 10:50:15 2021
197	s24	0.35258518222749785	0.4266540094462261	10	0.3929608500583964	0.27477618797492565	ridge_mdtb4002_wb_indv_10_alpha_6	L2regression	glm7	sc1	sess	True	mdtb4002_wb_indv_10	cerebellum_suit	True	4	crossed	False	6	Tue Jul 13 10:50:18 2021
198	s25	0.3508141813228823	0.4530056369438116	10	0.3939883810616565	0.14169509736616867	ridge_mdtb4002_wb_indv_10_alpha_6	L2regression	glm7	sc1	sess	True	mdtb4002_wb_indv_10	cerebellum_suit	True	4	crossed	False	6	Tue Jul 13 10:50:19 2021
199	s27	0.3273703344003257	0.4142147632416992	10	0.3702576432743636	0.26737365121155515	ridge_mdtb4002_wb_indv_10_alpha_6	L2regression	glm7	sc1	sess	True	mdtb4002_wb_indv_10	cerebellum_suit	True	4	crossed	False	6	Tue Jul 13 10:50:21 2021
200	s28	0.3222064641979885	0.4367781893957591	10	0.34965527194712165	0.2508304409997918	ridge_mdtb4002_wb_indv_10_alpha_6	L2regression	glm7	sc1	sess	True	mdtb4002_wb_indv_10	cerebellum_suit	True	4	crossed	False	6	Tue Jul 13 10:50:23 2021
201	s29	0.4578231698292459	0.3989218884172024	10	0.5251885805098779	0.1109959685788418	ridge_mdtb4002_wb_indv_10_alpha_6	L2regression	glm7	sc1	sess	True	mdtb4002_wb_indv_10	cerebellum_suit	True	4	crossed	False	6	Tue Jul 13 10:50:26 2021
202	s30	0.3871257658408481	0.4700897205065308	10	0.4426031318557872	0.16517033034578205	ridge_mdtb4002_wb_indv_10_alpha_6	L2regression	glm7	sc1	sess	True	mdtb4002_wb_indv_10	cerebellum_suit	True	4	crossed	False	6	Tue Jul 13 10:50:27 2021
203	s31	0.3196282694815973	0.4223489257306981	10	0.3544439715264528	0.12293511881368295	ridge_mdtb4002_wb_indv_10_alpha_6	L2regression	glm7	sc1	sess	True	mdtb4002_wb_indv_10	cerebellum_suit	True	4	crossed	False	6	Tue Jul 13 10:50:29 2021
204	s02	0.3436147038282641	0.4687571380045287	10	0.37964300109172494	0.2979811532867503	ridge_mdtb4002_wb_indv_10_alpha_8	L2regression	glm7	sc1	sess	True	mdtb4002_wb_indv_10	cerebellum_suit	True	4	crossed	False	8	Tue Jul 13 10:50:31 2021
205	s03	0.3925603169077225	0.5061370607851721	10	0.4510749003188865	0.3573422890172083	ridge_mdtb4002_wb_indv_10_alpha_8	L2regression	glm7	sc1	sess	True	mdtb4002_wb_indv_10	cerebellum_suit	True	4	crossed	False	8	Tue Jul 13 10:50:33 2021
206	s09	0.3323487375524873	0.4121254776162708	10	0.3692693844041275	0.31693510017744403	ridge_mdtb4002_wb_indv_10_alpha_8	L2regression	glm7	sc1	sess	True	mdtb4002_wb_indv_10	cerebellum_suit	True	4	crossed	False	8	Tue Jul 13 10:50:35 2021
207	s10	0.3747477875698304	0.4761907480097578	10	0.4144932165291953	0.2989728770978412	ridge_mdtb4002_wb_indv_10_alpha_8	L2regression	glm7	sc1	sess	True	mdtb4002_wb_indv_10	cerebellum_suit	True	4	crossed	False	8	Tue Jul 13 10:50:37 2021
208	s12	0.3666170197119683	0.4172124873036717	10	0.40128102855606224	0.2578521445675754	ridge_mdtb4002_wb_indv_10_alpha_8	L2regression	glm7	sc1	sess	True	mdtb4002_wb_indv_10	cerebellum_suit	True	4	crossed	False	8	Tue Jul 13 10:50:39 2021
209	s15	0.3692589875618815	0.3735994813804177	10	0.3983039736210052	0.12508331578174128	ridge_mdtb4002_wb_indv_10_alpha_8	L2regression	glm7	sc1	sess	True	mdtb4002_wb_indv_10	cerebellum_suit	True	4	crossed	False	8	Tue Jul 13 10:50:41 2021
210	s17	0.3879461494408984	0.5627149496802625	10	0.438935281881644	0.4060013180069221	ridge_mdtb4002_wb_indv_10_alpha_8	L2regression	glm7	sc1	sess	True	mdtb4002_wb_indv_10	cerebellum_suit	True	4	crossed	False	8	Tue Jul 13 10:50:43 2021
211	s18	0.2978658222634907	0.3547800596685017	10	0.3184558746823695	0.14946952239654598	ridge_mdtb4002_wb_indv_10_alpha_8	L2regression	glm7	sc1	sess	True	mdtb4002_wb_indv_10	cerebellum_suit	True	4	crossed	False	8	Tue Jul 13 10:50:46 2021
212	s19	0.2836755003861435	0.3740736007482217	10	0.3088914288582325	0.2302198067694648	ridge_mdtb4002_wb_indv_10_alpha_8	L2regression	glm7	sc1	sess	True	mdtb4002_wb_indv_10	cerebellum_suit	True	4	crossed	False	8	Tue Jul 13 10:50:48 2021
213	s20	0.33746784096534044	0.43323008261285545	10	0.3692433393655751	0.3622194053446052	ridge_mdtb4002_wb_indv_10_alpha_8	L2regression	glm7	sc1	sess	True	mdtb4002_wb_indv_10	cerebellum_suit	True	4	crossed	False	8	Tue Jul 13 10:50:50 2021
214	s24	0.3679682396380164	0.3749163516983139	10	0.40156476303999145	0.2562058286746285	ridge_mdtb4002_wb_indv_10_alpha_8	L2regression	glm7	sc1	sess	True	mdtb4002_wb_indv_10	cerebellum_suit	True	4	crossed	False	8	Tue Jul 13 10:50:53 2021
215	s25	0.3644945053535788	0.4025715888603756	10	0.3970119709868158	0.10956004151024833	ridge_mdtb4002_wb_indv_10_alpha_8	L2regression	glm7	sc1	sess	True	mdtb4002_wb_indv_10	cerebellum_suit	True	4	crossed	False	8	Tue Jul 13 10:50:54 2021
216	s27	0.3415651628730621	0.3643839559184953	10	0.37755461172057503	0.2540648801270485	ridge_mdtb4002_wb_indv_10_alpha_8	L2regression	glm7	sc1	sess	True	mdtb4002_wb_indv_10	cerebellum_suit	True	4	crossed	False	8	Tue Jul 13 10:50:56 2021
217	s28	0.3342423866119889	0.3875682530292561	10	0.3553404818198134	0.2314993799240428	ridge_mdtb4002_wb_indv_10_alpha_8	L2regression	glm7	sc1	sess	True	mdtb4002_wb_indv_10	cerebellum_suit	True	4	crossed	False	8	Tue Jul 13 10:51:00 2021
218	s29	0.4708290844590966	0.3327194576301861	10	0.5278351513741132	0.08411077740051473	ridge_mdtb4002_wb_indv_10_alpha_8	L2regression	glm7	sc1	sess	True	mdtb4002_wb_indv_10	cerebellum_suit	True	4	crossed	False	8	Tue Jul 13 10:51:02 2021
219	s30	0.4034027864436307	0.4451879390952764	10	0.4466993600528744	0.15036081463928602	ridge_mdtb4002_wb_indv_10_alpha_8	L2regression	glm7	sc1	sess	True	mdtb4002_wb_indv_10	cerebellum_suit	True	4	crossed	False	8	Tue Jul 13 10:51:04 2021
220	s31	0.3298392291245537	0.3879233409879619	10	0.3560976175567427	0.1127966975988344	ridge_mdtb4002_wb_indv_10_alpha_8	L2regression	glm7	sc1	sess	True	mdtb4002_wb_indv_10	cerebellum_suit	True	4	crossed	False	8	Tue Jul 13 10:51:06 2021
221	s02	0.34769187507397625	0.4584525932934716	10	0.3821953350309368	0.2926452141713073	ridge_mdtb4002_wb_indv_10_alpha_10	L2regression	glm7	sc1	sess	True	mdtb4002_wb_indv_10	cerebellum_suit	True	4	crossed	False	10	Tue Jul 13 10:51:08 2021
222	s03	0.3972316346857202	0.4958583968586997	10	0.4546062874314031	0.3524727305360557	ridge_mdtb4002_wb_indv_10_alpha_10	L2regression	glm7	sc1	sess	True	mdtb4002_wb_indv_10	cerebellum_suit	True	4	crossed	False	10	Tue Jul 13 10:51:10 2021
223	s09	0.337179555280328	0.4009362792668345	10	0.3730589712905833	0.3113875510994341	ridge_mdtb4002_wb_indv_10_alpha_10	L2regression	glm7	sc1	sess	True	mdtb4002_wb_indv_10	cerebellum_suit	True	4	crossed	False	10	Tue Jul 13 10:51:12 2021
224	s10	0.37865005613488295	0.4595149739699607	10	0.4170221597802469	0.2881012140027412	ridge_mdtb4002_wb_indv_10_alpha_10	L2regression	glm7	sc1	sess	True	mdtb4002_wb_indv_10	cerebellum_suit	True	4	crossed	False	10	Tue Jul 13 10:51:14 2021
225	s12	0.37016457933571095	0.4036830829133591	10	0.4033862883590002	0.2515497483718821	ridge_mdtb4002_wb_indv_10_alpha_10	L2regression	glm7	sc1	sess	True	mdtb4002_wb_indv_10	cerebellum_suit	True	4	crossed	False	10	Tue Jul 13 10:51:16 2021
226	s15	0.37196281373689466	0.3573890934290093	10	0.39899396331388826	0.1191685970248566	ridge_mdtb4002_wb_indv_10_alpha_10	L2regression	glm7	sc1	sess	True	mdtb4002_wb_indv_10	cerebellum_suit	True	4	crossed	False	10	Tue Jul 13 10:51:19 2021
227	s17	0.3934510755039369	0.5576946027038979	10	0.44286109536755736	0.4033094612092608	ridge_mdtb4002_wb_indv_10_alpha_10	L2regression	glm7	sc1	sess	True	mdtb4002_wb_indv_10	cerebellum_suit	True	4	crossed	False	10	Tue Jul 13 10:51:21 2021
228	s18	0.2999994515006993	0.3442546509221233	10	0.31926736111947984	0.14682725827274876	ridge_mdtb4002_wb_indv_10_alpha_10	L2regression	glm7	sc1	sess	True	mdtb4002_wb_indv_10	cerebellum_suit	True	4	crossed	False	10	Tue Jul 13 10:51:23 2021
229	s19	0.2862336182242721	0.359633853788495	10	0.3103783476399596	0.2226210366374883	ridge_mdtb4002_wb_indv_10_alpha_10	L2regression	glm7	sc1	sess	True	mdtb4002_wb_indv_10	cerebellum_suit	True	4	crossed	False	10	Tue Jul 13 10:51:25 2021
230	s20	0.3434469243907642	0.4252354405162179	10	0.3736243957152901	0.35918858985184915	ridge_mdtb4002_wb_indv_10_alpha_10	L2regression	glm7	sc1	sess	True	mdtb4002_wb_indv_10	cerebellum_suit	True	4	crossed	False	10	Tue Jul 13 10:51:27 2021
231	s24	0.37247208193879583	0.3650935730116529	10	0.4043774960581516	0.25270687515432505	ridge_mdtb4002_wb_indv_10_alpha_10	L2regression	glm7	sc1	sess	True	mdtb4002_wb_indv_10	cerebellum_suit	True	4	crossed	False	10	Tue Jul 13 10:51:29 2021
232	s25	0.36751211925077065	0.3909782720211396	10	0.3977464166296836	0.10320440845801193	ridge_mdtb4002_wb_indv_10_alpha_10	L2regression	glm7	sc1	sess	True	mdtb4002_wb_indv_10	cerebellum_suit	True	4	crossed	False	10	Tue Jul 13 10:51:31 2021
233	s27	0.34619811372758424	0.35520770668314844	10	0.3803044372897523	0.25143661947057744	ridge_mdtb4002_wb_indv_10_alpha_10	L2regression	glm7	sc1	sess	True	mdtb4002_wb_indv_10	cerebellum_suit	True	4	crossed	False	10	Tue Jul 13 10:51:33 2021
234	s28	0.3369566730647261	0.3767892667416747	10	0.3568138786631122	0.2273182774681677	ridge_mdtb4002_wb_indv_10_alpha_10	L2regression	glm7	sc1	sess	True	mdtb4002_wb_indv_10	cerebellum_suit	True	4	crossed	False	10	Tue Jul 13 10:51:35 2021
235	s29	0.4736719181891161	0.31727111257874624	10	0.5285622749578548	0.07880344519322817	ridge_mdtb4002_wb_indv_10_alpha_10	L2regression	glm7	sc1	sess	True	mdtb4002_wb_indv_10	cerebellum_suit	True	4	crossed	False	10	Tue Jul 13 10:51:37 2021
236	s30	0.4067223743988808	0.4393960404474079	10	0.4476680874846544	0.14711164735457938	ridge_mdtb4002_wb_indv_10_alpha_10	L2regression	glm7	sc1	sess	True	mdtb4002_wb_indv_10	cerebellum_suit	True	4	crossed	False	10	Tue Jul 13 10:51:39 2021
237	s31	0.3318871541227849	0.3800091122155352	10	0.35661960376214313	0.1105803874107122	ridge_mdtb4002_wb_indv_10_alpha_10	L2regression	glm7	sc1	sess	True	mdtb4002_wb_indv_10	cerebellum_suit	True	4	crossed	False	10	Tue Jul 13 10:51:42 2021
238	s02	0.2905277737717001	0.5827346198235146	7	0.3816888668770371	0.3358931669435018	ridge_mdtb4002_wb_indv_7_alpha_-2	L2regression	glm7	sc1	sess	True	mdtb4002_wb_indv_7	cerebellum_suit	True	4	crossed	False	-2	Tue Jul 13 10:37:45 2021
239	s03	0.32520672396125816	0.6202997549918364	7	0.4400172824038814	0.4065378867577032	ridge_mdtb4002_wb_indv_7_alpha_-2	L2regression	glm7	sc1	sess	True	mdtb4002_wb_indv_7	cerebellum_suit	True	4	crossed	False	-2	Tue Jul 13 10:37:48 2021
240	s09	0.280569496439944	0.5931708855745246	7	0.3556889067935456	0.39623717356812704	ridge_mdtb4002_wb_indv_7_alpha_-2	L2regression	glm7	sc1	sess	True	mdtb4002_wb_indv_7	cerebellum_suit	True	4	crossed	False	-2	Tue Jul 13 10:37:51 2021
241	s10	0.3119512503494057	0.6092277727955848	7	0.404683480927039	0.3946683775084948	ridge_mdtb4002_wb_indv_7_alpha_-2	L2regression	glm7	sc1	sess	True	mdtb4002_wb_indv_7	cerebellum_suit	True	4	crossed	False	-2	Tue Jul 13 10:37:53 2021
242	s12	0.3135363215075731	0.5560122604522906	7	0.40439130215929175	0.3200935001362488	ridge_mdtb4002_wb_indv_7_alpha_-2	L2regression	glm7	sc1	sess	True	mdtb4002_wb_indv_7	cerebellum_suit	True	4	crossed	False	-2	Tue Jul 13 10:37:55 2021
243	s15	0.3215252110675744	0.5125627206400539	7	0.4190276439394215	0.2294826011403441	ridge_mdtb4002_wb_indv_7_alpha_-2	L2regression	glm7	sc1	sess	True	mdtb4002_wb_indv_7	cerebellum_suit	True	4	crossed	False	-2	Tue Jul 13 10:37:58 2021
244	s17	0.3139165461076929	0.6369888799116691	7	0.4202133837439731	0.43577154524273604	ridge_mdtb4002_wb_indv_7_alpha_-2	L2regression	glm7	sc1	sess	True	mdtb4002_wb_indv_7	cerebellum_suit	True	4	crossed	False	-2	Tue Jul 13 10:38:01 2021
245	s18	0.2640357194959779	0.4872852368630977	7	0.3320334557991634	0.21356160987124284	ridge_mdtb4002_wb_indv_7_alpha_-2	L2regression	glm7	sc1	sess	True	mdtb4002_wb_indv_7	cerebellum_suit	True	4	crossed	False	-2	Tue Jul 13 10:38:03 2021
246	s19	0.2476819837941304	0.5238538696723529	7	0.3134020684038394	0.2984221609377267	ridge_mdtb4002_wb_indv_7_alpha_-2	L2regression	glm7	sc1	sess	True	mdtb4002_wb_indv_7	cerebellum_suit	True	4	crossed	False	-2	Tue Jul 13 10:38:05 2021
247	s20	0.2889644555593689	0.5553515490889015	7	0.36653406487521056	0.34613591594780035	ridge_mdtb4002_wb_indv_7_alpha_-2	L2regression	glm7	sc1	sess	True	mdtb4002_wb_indv_7	cerebellum_suit	True	4	crossed	False	-2	Tue Jul 13 10:38:07 2021
248	s24	0.3173481183235729	0.5430301760736392	7	0.4081343558071003	0.29563914035144395	ridge_mdtb4002_wb_indv_7_alpha_-2	L2regression	glm7	sc1	sess	True	mdtb4002_wb_indv_7	cerebellum_suit	True	4	crossed	False	-2	Tue Jul 13 10:38:10 2021
249	s25	0.3183358362590681	0.5178953446869843	7	0.4225294771727634	0.20525373265008293	ridge_mdtb4002_wb_indv_7_alpha_-2	L2regression	glm7	sc1	sess	True	mdtb4002_wb_indv_7	cerebellum_suit	True	4	crossed	False	-2	Tue Jul 13 10:38:12 2021
250	s27	0.2962536856345162	0.5360465544201034	7	0.4023688394089113	0.2636839270590935	ridge_mdtb4002_wb_indv_7_alpha_-2	L2regression	glm7	sc1	sess	True	mdtb4002_wb_indv_7	cerebellum_suit	True	4	crossed	False	-2	Tue Jul 13 10:38:14 2021
251	s28	0.29137182065069755	0.5194561604900418	7	0.3722750124948715	0.27317325804122805	ridge_mdtb4002_wb_indv_7_alpha_-2	L2regression	glm7	sc1	sess	True	mdtb4002_wb_indv_7	cerebellum_suit	True	4	crossed	False	-2	Tue Jul 13 10:38:16 2021
252	s29	0.4211684592091473	0.4732127927502679	7	0.5903931350547038	0.14084359230081234	ridge_mdtb4002_wb_indv_7_alpha_-2	L2regression	glm7	sc1	sess	True	mdtb4002_wb_indv_7	cerebellum_suit	True	4	crossed	False	-2	Tue Jul 13 10:38:18 2021
253	s30	0.3539624296029139	0.497209050906669	7	0.4865857918648448	0.1558962011986525	ridge_mdtb4002_wb_indv_7_alpha_-2	L2regression	glm7	sc1	sess	True	mdtb4002_wb_indv_7	cerebellum_suit	True	4	crossed	False	-2	Tue Jul 13 10:38:22 2021
254	s31	0.2978407141155293	0.4439995724290098	7	0.3869043323758041	0.12625889283504071	ridge_mdtb4002_wb_indv_7_alpha_-2	L2regression	glm7	sc1	sess	True	mdtb4002_wb_indv_7	cerebellum_suit	True	4	crossed	False	-2	Tue Jul 13 10:38:23 2021
255	s02	0.2905965329787255	0.5825511192286049	7	0.3785502302822149	0.3395016575244844	ridge_mdtb4002_wb_indv_7_alpha_0	L2regression	glm7	sc1	sess	True	mdtb4002_wb_indv_7	cerebellum_suit	True	4	crossed	False	0	Tue Jul 13 10:38:26 2021
256	s03	0.32540466057931	0.6198816159524276	7	0.4372794439169976	0.4071378500543554	ridge_mdtb4002_wb_indv_7_alpha_0	L2regression	glm7	sc1	sess	True	mdtb4002_wb_indv_7	cerebellum_suit	True	4	crossed	False	0	Tue Jul 13 10:38:29 2021
257	s09	0.2807238464830991	0.5928157095791441	7	0.3520838437255371	0.4002297914376564	ridge_mdtb4002_wb_indv_7_alpha_0	L2regression	glm7	sc1	sess	True	mdtb4002_wb_indv_7	cerebellum_suit	True	4	crossed	False	0	Tue Jul 13 10:38:31 2021
258	s10	0.31207851792367797	0.6089620307110974	7	0.4010145257709997	0.3975601974985656	ridge_mdtb4002_wb_indv_7_alpha_0	L2regression	glm7	sc1	sess	True	mdtb4002_wb_indv_7	cerebellum_suit	True	4	crossed	False	0	Tue Jul 13 10:38:33 2021
259	s12	0.3136881021692087	0.5556015389276159	7	0.4003254413685731	0.32339735393152474	ridge_mdtb4002_wb_indv_7_alpha_0	L2regression	glm7	sc1	sess	True	mdtb4002_wb_indv_7	cerebellum_suit	True	4	crossed	False	0	Tue Jul 13 10:38:36 2021
260	s15	0.3215839207007967	0.512438033028225	7	0.4150304943162553	0.23063401920035034	ridge_mdtb4002_wb_indv_7_alpha_0	L2regression	glm7	sc1	sess	True	mdtb4002_wb_indv_7	cerebellum_suit	True	4	crossed	False	0	Tue Jul 13 10:38:38 2021
261	s17	0.31395784671328997	0.6369294910023336	7	0.4176868378476221	0.4375132048265968	ridge_mdtb4002_wb_indv_7_alpha_0	L2regression	glm7	sc1	sess	True	mdtb4002_wb_indv_7	cerebellum_suit	True	4	crossed	False	0	Tue Jul 13 10:38:40 2021
262	s18	0.26407674863463165	0.4871684208243631	7	0.32982198334455715	0.2151703223263344	ridge_mdtb4002_wb_indv_7_alpha_0	L2regression	glm7	sc1	sess	True	mdtb4002_wb_indv_7	cerebellum_suit	True	4	crossed	False	0	Tue Jul 13 10:38:43 2021
263	s19	0.2477564509728686	0.5235603385166427	7	0.3102082080671382	0.3037335205907609	ridge_mdtb4002_wb_indv_7_alpha_0	L2regression	glm7	sc1	sess	True	mdtb4002_wb_indv_7	cerebellum_suit	True	4	crossed	False	0	Tue Jul 13 10:38:45 2021
264	s20	0.2890384751682665	0.5551516311007118	7	0.3627631973368993	0.35357114371771897	ridge_mdtb4002_wb_indv_7_alpha_0	L2regression	glm7	sc1	sess	True	mdtb4002_wb_indv_7	cerebellum_suit	True	4	crossed	False	0	Tue Jul 13 10:38:47 2021
265	s24	0.3174824795484387	0.5427334107448591	7	0.4040240437236247	0.29869072583785883	ridge_mdtb4002_wb_indv_7_alpha_0	L2regression	glm7	sc1	sess	True	mdtb4002_wb_indv_7	cerebellum_suit	True	4	crossed	False	0	Tue Jul 13 10:38:50 2021
266	s25	0.3183904888082758	0.5177741598749469	7	0.41949935739900895	0.2058412316338289	ridge_mdtb4002_wb_indv_7_alpha_0	L2regression	glm7	sc1	sess	True	mdtb4002_wb_indv_7	cerebellum_suit	True	4	crossed	False	0	Tue Jul 13 10:38:52 2021
267	s27	0.29637904793312675	0.535726617799711	7	0.3973382580874679	0.26644102866331865	ridge_mdtb4002_wb_indv_7_alpha_0	L2regression	glm7	sc1	sess	True	mdtb4002_wb_indv_7	cerebellum_suit	True	4	crossed	False	0	Tue Jul 13 10:38:54 2021
268	s28	0.2914200952549432	0.5193539533296472	7	0.3695013081610867	0.2747586929305996	ridge_mdtb4002_wb_indv_7_alpha_0	L2regression	glm7	sc1	sess	True	mdtb4002_wb_indv_7	cerebellum_suit	True	4	crossed	False	0	Tue Jul 13 10:38:56 2021
269	s29	0.4212451202678085	0.4730644497733046	7	0.5834800955312854	0.1427944400094839	ridge_mdtb4002_wb_indv_7_alpha_0	L2regression	glm7	sc1	sess	True	mdtb4002_wb_indv_7	cerebellum_suit	True	4	crossed	False	0	Tue Jul 13 10:38:58 2021
270	s30	0.3539854181943855	0.4971729245203013	7	0.4830717613650928	0.15803802259001176	ridge_mdtb4002_wb_indv_7_alpha_0	L2regression	glm7	sc1	sess	True	mdtb4002_wb_indv_7	cerebellum_suit	True	4	crossed	False	0	Tue Jul 13 10:39:01 2021
271	s31	0.2978647654527295	0.4439430176059231	7	0.3847993866149016	0.12663495622371526	ridge_mdtb4002_wb_indv_7_alpha_0	L2regression	glm7	sc1	sess	True	mdtb4002_wb_indv_7	cerebellum_suit	True	4	crossed	False	0	Tue Jul 13 10:39:03 2021
272	s02	0.2923275905278915	0.5779689468150655	7	0.36783356963652375	0.3487934036823228	ridge_mdtb4002_wb_indv_7_alpha_2	L2regression	glm7	sc1	sess	True	mdtb4002_wb_indv_7	cerebellum_suit	True	4	crossed	False	2	Tue Jul 13 10:39:06 2021
273	s03	0.3291171316932391	0.6117794380453508	7	0.4290455697255768	0.4053599796252565	ridge_mdtb4002_wb_indv_7_alpha_2	L2regression	glm7	sc1	sess	True	mdtb4002_wb_indv_7	cerebellum_suit	True	4	crossed	False	2	Tue Jul 13 10:39:08 2021
274	s09	0.28404973117177945	0.5845530267807401	7	0.3434597042358666	0.4079619245176092	ridge_mdtb4002_wb_indv_7_alpha_2	L2regression	glm7	sc1	sess	True	mdtb4002_wb_indv_7	cerebellum_suit	True	4	crossed	False	2	Tue Jul 13 10:39:10 2021
275	s10	0.3148146060297147	0.6035769749248068	7	0.3890555342340177	0.4038020140502495	ridge_mdtb4002_wb_indv_7_alpha_2	L2regression	glm7	sc1	sess	True	mdtb4002_wb_indv_7	cerebellum_suit	True	4	crossed	False	2	Tue Jul 13 10:39:12 2021
276	s12	0.3166835794351653	0.5471668325229031	7	0.3891176763805381	0.3309146173146061	ridge_mdtb4002_wb_indv_7_alpha_2	L2regression	glm7	sc1	sess	True	mdtb4002_wb_indv_7	cerebellum_suit	True	4	crossed	False	2	Tue Jul 13 10:39:14 2021
277	s15	0.32326897445195696	0.508935517814316	7	0.4018303752628434	0.2304154764941972	ridge_mdtb4002_wb_indv_7_alpha_2	L2regression	glm7	sc1	sess	True	mdtb4002_wb_indv_7	cerebellum_suit	True	4	crossed	False	2	Tue Jul 13 10:39:16 2021
278	s17	0.3153826139278005	0.634901627546824	7	0.40719758045171056	0.4437302544662501	ridge_mdtb4002_wb_indv_7_alpha_2	L2regression	glm7	sc1	sess	True	mdtb4002_wb_indv_7	cerebellum_suit	True	4	crossed	False	2	Tue Jul 13 10:39:19 2021
279	s18	0.2652245840899703	0.4840175064893205	7	0.3212649490958869	0.219032941433268	ridge_mdtb4002_wb_indv_7_alpha_2	L2regression	glm7	sc1	sess	True	mdtb4002_wb_indv_7	cerebellum_suit	True	4	crossed	False	2	Tue Jul 13 10:39:21 2021
280	s19	0.24926674483318345	0.5179169015113619	7	0.3011851712142105	0.31708361037950805	ridge_mdtb4002_wb_indv_7_alpha_2	L2regression	glm7	sc1	sess	True	mdtb4002_wb_indv_7	cerebellum_suit	True	4	crossed	False	2	Tue Jul 13 10:39:23 2021
281	s20	0.29087056655148114	0.5499286135026598	7	0.3511822436255529	0.3785791808656424	ridge_mdtb4002_wb_indv_7_alpha_2	L2regression	glm7	sc1	sess	True	mdtb4002_wb_indv_7	cerebellum_suit	True	4	crossed	False	2	Tue Jul 13 10:39:25 2021
282	s24	0.32057311445123515	0.5350320324222346	7	0.39239321770954017	0.3066390217081744	ridge_mdtb4002_wb_indv_7_alpha_2	L2regression	glm7	sc1	sess	True	mdtb4002_wb_indv_7	cerebellum_suit	True	4	crossed	False	2	Tue Jul 13 10:39:28 2021
283	s25	0.3199685212418043	0.5142398169630211	7	0.4072196258941061	0.2062341047027884	ridge_mdtb4002_wb_indv_7_alpha_2	L2regression	glm7	sc1	sess	True	mdtb4002_wb_indv_7	cerebellum_suit	True	4	crossed	False	2	Tue Jul 13 10:39:30 2021
284	s27	0.2990772456701218	0.5282171773935489	7	0.3814159287633092	0.2742661819837404	ridge_mdtb4002_wb_indv_7_alpha_2	L2regression	glm7	sc1	sess	True	mdtb4002_wb_indv_7	cerebellum_suit	True	4	crossed	False	2	Tue Jul 13 10:39:33 2021
285	s28	0.2929027753508644	0.516120672459498	7	0.35843274530761515	0.2800966550267502	ridge_mdtb4002_wb_indv_7_alpha_2	L2regression	glm7	sc1	sess	True	mdtb4002_wb_indv_7	cerebellum_suit	True	4	crossed	False	2	Tue Jul 13 10:39:35 2021
286	s29	0.4232556869103369	0.4692342136061137	7	0.5567401701973097	0.1493231219487799	ridge_mdtb4002_wb_indv_7_alpha_2	L2regression	glm7	sc1	sess	True	mdtb4002_wb_indv_7	cerebellum_suit	True	4	crossed	False	2	Tue Jul 13 10:39:38 2021
287	s30	0.3548224844796142	0.4959113729309911	7	0.4668161030306951	0.16794960381974405	ridge_mdtb4002_wb_indv_7_alpha_2	L2regression	glm7	sc1	sess	True	mdtb4002_wb_indv_7	cerebellum_suit	True	4	crossed	False	2	Tue Jul 13 10:39:39 2021
288	s31	0.2986906441260033	0.4419191126830455	7	0.3747613712901619	0.1281902615688201	ridge_mdtb4002_wb_indv_7_alpha_2	L2regression	glm7	sc1	sess	True	mdtb4002_wb_indv_7	cerebellum_suit	True	4	crossed	False	2	Tue Jul 13 10:39:42 2021
289	s02	0.30431309400600337	0.5530037377413828	7	0.3588489940418863	0.3485793510300652	ridge_mdtb4002_wb_indv_7_alpha_4	L2regression	glm7	sc1	sess	True	mdtb4002_wb_indv_7	cerebellum_suit	True	4	crossed	False	4	Tue Jul 13 10:39:44 2021
290	s03	0.3462384729022301	0.5814844586826853	7	0.4228383481292043	0.3938713112031993	ridge_mdtb4002_wb_indv_7_alpha_4	L2regression	glm7	sc1	sess	True	mdtb4002_wb_indv_7	cerebellum_suit	True	4	crossed	False	4	Tue Jul 13 10:39:46 2021
291	s09	0.3003114117369152	0.5344416788110905	7	0.3455723400417706	0.3866867137939015	ridge_mdtb4002_wb_indv_7_alpha_4	L2regression	glm7	sc1	sess	True	mdtb4002_wb_indv_7	cerebellum_suit	True	4	crossed	False	4	Tue Jul 13 10:39:48 2021
292	s10	0.33216429059384683	0.5764338839563884	7	0.38612485292453225	0.3865405201579273	ridge_mdtb4002_wb_indv_7_alpha_4	L2regression	glm7	sc1	sess	True	mdtb4002_wb_indv_7	cerebellum_suit	True	4	crossed	False	4	Tue Jul 13 10:39:50 2021
293	s12	0.3307921455981195	0.5115202234971419	7	0.3829197281600221	0.3257354488870988	ridge_mdtb4002_wb_indv_7_alpha_4	L2regression	glm7	sc1	sess	True	mdtb4002_wb_indv_7	cerebellum_suit	True	4	crossed	False	4	Tue Jul 13 10:39:52 2021
294	s15	0.3367006774846979	0.4812345213113085	7	0.39182765655288265	0.20655697894225072	ridge_mdtb4002_wb_indv_7_alpha_4	L2regression	glm7	sc1	sess	True	mdtb4002_wb_indv_7	cerebellum_suit	True	4	crossed	False	4	Tue Jul 13 10:39:55 2021
295	s17	0.3308378113016007	0.6156199089932617	7	0.4010388035803251	0.4399436328007141	ridge_mdtb4002_wb_indv_7_alpha_4	L2regression	glm7	sc1	sess	True	mdtb4002_wb_indv_7	cerebellum_suit	True	4	crossed	False	4	Tue Jul 13 10:39:58 2021
296	s18	0.2745538216892208	0.4569207103052665	7	0.31321719853084684	0.205796371634994	ridge_mdtb4002_wb_indv_7_alpha_4	L2regression	glm7	sc1	sess	True	mdtb4002_wb_indv_7	cerebellum_suit	True	4	crossed	False	4	Tue Jul 13 10:40:00 2021
297	s19	0.2584320900664471	0.4892142637397393	7	0.2960630508084915	0.3131810850649136	ridge_mdtb4002_wb_indv_7_alpha_4	L2regression	glm7	sc1	sess	True	mdtb4002_wb_indv_7	cerebellum_suit	True	4	crossed	False	4	Tue Jul 13 10:40:02 2021
298	s20	0.3021231869437344	0.5137658772972624	7	0.34528915024994644	0.39366181975965336	ridge_mdtb4002_wb_indv_7_alpha_4	L2regression	glm7	sc1	sess	True	mdtb4002_wb_indv_7	cerebellum_suit	True	4	crossed	False	4	Tue Jul 13 10:40:04 2021
299	s24	0.33601820402487703	0.4842662216460688	7	0.3872936547157745	0.29898145614866145	ridge_mdtb4002_wb_indv_7_alpha_4	L2regression	glm7	sc1	sess	True	mdtb4002_wb_indv_7	cerebellum_suit	True	4	crossed	False	4	Tue Jul 13 10:40:07 2021
300	s25	0.3322454536785629	0.4882181280274874	7	0.3928760062470773	0.18678497314927786	ridge_mdtb4002_wb_indv_7_alpha_4	L2regression	glm7	sc1	sess	True	mdtb4002_wb_indv_7	cerebellum_suit	True	4	crossed	False	4	Tue Jul 13 10:40:08 2021
301	s27	0.3124202846518069	0.4818665382644212	7	0.3684059875039989	0.2760087951864913	ridge_mdtb4002_wb_indv_7_alpha_4	L2regression	glm7	sc1	sess	True	mdtb4002_wb_indv_7	cerebellum_suit	True	4	crossed	False	4	Tue Jul 13 10:40:10 2021
302	s28	0.30506700679867016	0.4884665705284804	7	0.3466920283877373	0.27709616224936645	ridge_mdtb4002_wb_indv_7_alpha_4	L2regression	glm7	sc1	sess	True	mdtb4002_wb_indv_7	cerebellum_suit	True	4	crossed	False	4	Tue Jul 13 10:40:12 2021
303	s29	0.4374407070223573	0.4446848714977685	7	0.5268983737149419	0.14463405752976388	ridge_mdtb4002_wb_indv_7_alpha_4	L2regression	glm7	sc1	sess	True	mdtb4002_wb_indv_7	cerebellum_suit	True	4	crossed	False	4	Tue Jul 13 10:40:14 2021
304	s30	0.36523504333218265	0.4827759709390576	7	0.4434897046520726	0.17684215951492746	ridge_mdtb4002_wb_indv_7_alpha_4	L2regression	glm7	sc1	sess	True	mdtb4002_wb_indv_7	cerebellum_suit	True	4	crossed	False	4	Tue Jul 13 10:40:16 2021
305	s31	0.3068143783794661	0.4212901210796402	7	0.3584285216155198	0.1269040110977222	ridge_mdtb4002_wb_indv_7_alpha_4	L2regression	glm7	sc1	sess	True	mdtb4002_wb_indv_7	cerebellum_suit	True	4	crossed	False	4	Tue Jul 13 10:40:18 2021
306	s02	0.33048643736243266	0.5054093409064232	7	0.3711344180755655	0.3227711615140512	ridge_mdtb4002_wb_indv_7_alpha_6	L2regression	glm7	sc1	sess	True	mdtb4002_wb_indv_7	cerebellum_suit	True	4	crossed	False	6	Tue Jul 13 10:40:20 2021
307	s03	0.3777804640612473	0.5349430830710035	7	0.4398455074258722	0.3678828111190353	ridge_mdtb4002_wb_indv_7_alpha_6	L2regression	glm7	sc1	sess	True	mdtb4002_wb_indv_7	cerebellum_suit	True	4	crossed	False	6	Tue Jul 13 10:40:23 2021
308	s09	0.32126295760254997	0.4342586485380033	7	0.3601303990614966	0.3242200513347936	ridge_mdtb4002_wb_indv_7_alpha_6	L2regression	glm7	sc1	sess	True	mdtb4002_wb_indv_7	cerebellum_suit	True	4	crossed	False	6	Tue Jul 13 10:40:25 2021
309	s10	0.362534264214916	0.5097144125125193	7	0.40609547200794494	0.3219350803623726	ridge_mdtb4002_wb_indv_7_alpha_6	L2regression	glm7	sc1	sess	True	mdtb4002_wb_indv_7	cerebellum_suit	True	4	crossed	False	6	Tue Jul 13 10:40:27 2021
310	s12	0.3546868946860533	0.4512559807208494	7	0.3935139350561631	0.29322907122886793	ridge_mdtb4002_wb_indv_7_alpha_6	L2regression	glm7	sc1	sess	True	mdtb4002_wb_indv_7	cerebellum_suit	True	4	crossed	False	6	Tue Jul 13 10:40:30 2021
311	s15	0.3595785096017832	0.4096496864394323	7	0.3954230299336035	0.15924546277576065	ridge_mdtb4002_wb_indv_7_alpha_6	L2regression	glm7	sc1	sess	True	mdtb4002_wb_indv_7	cerebellum_suit	True	4	crossed	False	6	Tue Jul 13 10:40:33 2021
312	s17	0.3689730338829848	0.5790380715491023	7	0.42513087555008977	0.4184232902673004	ridge_mdtb4002_wb_indv_7_alpha_6	L2regression	glm7	sc1	sess	True	mdtb4002_wb_indv_7	cerebellum_suit	True	4	crossed	False	6	Tue Jul 13 10:40:36 2021
313	s18	0.2907654007840449	0.3846531997264933	7	0.31582622257008064	0.17278839577563826	ridge_mdtb4002_wb_indv_7_alpha_6	L2regression	glm7	sc1	sess	True	mdtb4002_wb_indv_7	cerebellum_suit	True	4	crossed	False	6	Tue Jul 13 10:40:38 2021
314	s19	0.2754262900938496	0.42047248531024056	7	0.3039291792171704	0.26649386095612115	ridge_mdtb4002_wb_indv_7_alpha_6	L2regression	glm7	sc1	sess	True	mdtb4002_wb_indv_7	cerebellum_suit	True	4	crossed	False	6	Tue Jul 13 10:40:40 2021
315	s20	0.3226007854819375	0.448563434889958	7	0.35720745858176073	0.3728446343495007	ridge_mdtb4002_wb_indv_7_alpha_6	L2regression	glm7	sc1	sess	True	mdtb4002_wb_indv_7	cerebellum_suit	True	4	crossed	False	6	Tue Jul 13 10:40:42 2021
316	s24	0.3563191289444058	0.404010377865677	7	0.39419917947759375	0.2724395533964675	ridge_mdtb4002_wb_indv_7_alpha_6	L2regression	glm7	sc1	sess	True	mdtb4002_wb_indv_7	cerebellum_suit	True	4	crossed	False	6	Tue Jul 13 10:40:45 2021
317	s25	0.3545771067484069	0.4225446215518288	7	0.3946408209445549	0.1310949560865515	ridge_mdtb4002_wb_indv_7_alpha_6	L2regression	glm7	sc1	sess	True	mdtb4002_wb_indv_7	cerebellum_suit	True	4	crossed	False	6	Tue Jul 13 10:40:47 2021
318	s27	0.3309337511200467	0.39865999864460455	7	0.3717613771559014	0.2628340037761696	ridge_mdtb4002_wb_indv_7_alpha_6	L2regression	glm7	sc1	sess	True	mdtb4002_wb_indv_7	cerebellum_suit	True	4	crossed	False	6	Tue Jul 13 10:40:49 2021
319	s28	0.32577117549722673	0.415322135381712	7	0.3512802159773997	0.2432730384512448	ridge_mdtb4002_wb_indv_7_alpha_6	L2regression	glm7	sc1	sess	True	mdtb4002_wb_indv_7	cerebellum_suit	True	4	crossed	False	6	Tue Jul 13 10:40:51 2021
320	s29	0.4612475294599747	0.3772241680071993	7	0.5256047295809665	0.10807018766489464	ridge_mdtb4002_wb_indv_7_alpha_6	L2regression	glm7	sc1	sess	True	mdtb4002_wb_indv_7	cerebellum_suit	True	4	crossed	False	6	Tue Jul 13 10:40:53 2021
321	s30	0.3913432351792789	0.4531607250488547	7	0.44349943185748864	0.15745914292519544	ridge_mdtb4002_wb_indv_7_alpha_6	L2regression	glm7	sc1	sess	True	mdtb4002_wb_indv_7	cerebellum_suit	True	4	crossed	False	6	Tue Jul 13 10:40:55 2021
322	s31	0.32282130572366063	0.37997962617332864	7	0.35487113769696443	0.11418035267967125	ridge_mdtb4002_wb_indv_7_alpha_6	L2regression	glm7	sc1	sess	True	mdtb4002_wb_indv_7	cerebellum_suit	True	4	crossed	False	6	Tue Jul 13 10:40:57 2021
323	s02	0.3449356800235963	0.4757766524760606	7	0.3804050286517728	0.3057922078236949	ridge_mdtb4002_wb_indv_7_alpha_8	L2regression	glm7	sc1	sess	True	mdtb4002_wb_indv_7	cerebellum_suit	True	4	crossed	False	8	Tue Jul 13 10:40:59 2021
324	s03	0.39418732898466174	0.5040626560058387	7	0.4522602861916553	0.35187553064203875	ridge_mdtb4002_wb_indv_7_alpha_8	L2regression	glm7	sc1	sess	True	mdtb4002_wb_indv_7	cerebellum_suit	True	4	crossed	False	8	Tue Jul 13 10:41:02 2021
325	s09	0.33390912195382544	0.3883461929739097	7	0.3704895678846461	0.299742906994721	ridge_mdtb4002_wb_indv_7_alpha_8	L2regression	glm7	sc1	sess	True	mdtb4002_wb_indv_7	cerebellum_suit	True	4	crossed	False	8	Tue Jul 13 10:41:04 2021
326	s10	0.37615293549366585	0.4601097090896166	7	0.4153957120857802	0.28427314230709744	ridge_mdtb4002_wb_indv_7_alpha_8	L2regression	glm7	sc1	sess	True	mdtb4002_wb_indv_7	cerebellum_suit	True	4	crossed	False	8	Tue Jul 13 10:41:07 2021
327	s12	0.36754920345321	0.4117356332059097	7	0.401650233444926	0.2729578141106021	ridge_mdtb4002_wb_indv_7_alpha_8	L2regression	glm7	sc1	sess	True	mdtb4002_wb_indv_7	cerebellum_suit	True	4	crossed	False	8	Tue Jul 13 10:41:10 2021
328	s15	0.3699554153612784	0.36231674484345305	7	0.3983378055487605	0.13796137802684327	ridge_mdtb4002_wb_indv_7_alpha_8	L2regression	glm7	sc1	sess	True	mdtb4002_wb_indv_7	cerebellum_suit	True	4	crossed	False	8	Tue Jul 13 10:41:12 2021
329	s17	0.38967119551418106	0.5615525345726744	7	0.4401721809197534	0.4081370962615308	ridge_mdtb4002_wb_indv_7_alpha_8	L2regression	glm7	sc1	sess	True	mdtb4002_wb_indv_7	cerebellum_suit	True	4	crossed	False	8	Tue Jul 13 10:41:14 2021
330	s18	0.29848122234074703	0.3464801945711515	7	0.3186238973030495	0.1603742079437476	ridge_mdtb4002_wb_indv_7_alpha_8	L2regression	glm7	sc1	sess	True	mdtb4002_wb_indv_7	cerebellum_suit	True	4	crossed	False	8	Tue Jul 13 10:41:16 2021
331	s19	0.2843811750245277	0.3763250957634958	7	0.3092685369340473	0.2400246365779605	ridge_mdtb4002_wb_indv_7_alpha_8	L2regression	glm7	sc1	sess	True	mdtb4002_wb_indv_7	cerebellum_suit	True	4	crossed	False	8	Tue Jul 13 10:41:18 2021
332	s20	0.3390818419290305	0.41785683972361615	7	0.3703014157336148	0.3603355773260919	ridge_mdtb4002_wb_indv_7_alpha_8	L2regression	glm7	sc1	sess	True	mdtb4002_wb_indv_7	cerebellum_suit	True	4	crossed	False	8	Tue Jul 13 10:41:20 2021
333	s24	0.3692419997831757	0.36912299271279997	7	0.4022498798666645	0.2600126830514789	ridge_mdtb4002_wb_indv_7_alpha_8	L2regression	glm7	sc1	sess	True	mdtb4002_wb_indv_7	cerebellum_suit	True	4	crossed	False	8	Tue Jul 13 10:41:23 2021
334	s25	0.3653912566420691	0.3772232992936285	7	0.39719199197543625	0.10429474340758167	ridge_mdtb4002_wb_indv_7_alpha_8	L2regression	glm7	sc1	sess	True	mdtb4002_wb_indv_7	cerebellum_suit	True	4	crossed	False	8	Tue Jul 13 10:41:25 2021
335	s27	0.3431174570631456	0.3614945473273565	7	0.3784585634852081	0.2540489453910226	ridge_mdtb4002_wb_indv_7_alpha_8	L2regression	glm7	sc1	sess	True	mdtb4002_wb_indv_7	cerebellum_suit	True	4	crossed	False	8	Tue Jul 13 10:41:27 2021
336	s28	0.3351683939350819	0.3668739135880853	7	0.3558654521795311	0.22104332377771893	ridge_mdtb4002_wb_indv_7_alpha_8	L2regression	glm7	sc1	sess	True	mdtb4002_wb_indv_7	cerebellum_suit	True	4	crossed	False	8	Tue Jul 13 10:41:29 2021
337	s29	0.471686952335229	0.326570510295865	7	0.5280035918367558	0.08794844137224395	ridge_mdtb4002_wb_indv_7_alpha_8	L2regression	glm7	sc1	sess	True	mdtb4002_wb_indv_7	cerebellum_suit	True	4	crossed	False	8	Tue Jul 13 10:41:31 2021
338	s30	0.4043993546074615	0.4347154125785717	7	0.4469898427207937	0.14405907631063875	ridge_mdtb4002_wb_indv_7_alpha_8	L2regression	glm7	sc1	sess	True	mdtb4002_wb_indv_7	cerebellum_suit	True	4	crossed	False	8	Tue Jul 13 10:41:32 2021
339	s31	0.33049793294485025	0.35600510232108323	7	0.35625990956068593	0.10617840410181363	ridge_mdtb4002_wb_indv_7_alpha_8	L2regression	glm7	sc1	sess	True	mdtb4002_wb_indv_7	cerebellum_suit	True	4	crossed	False	8	Tue Jul 13 10:41:35 2021
340	s02	0.34790211520007475	0.4696343581748595	7	0.3823172645298455	0.3024712384534544	ridge_mdtb4002_wb_indv_7_alpha_10	L2regression	glm7	sc1	sess	True	mdtb4002_wb_indv_7	cerebellum_suit	True	4	crossed	False	10	Tue Jul 13 10:41:37 2021
341	s03	0.3974867444019512	0.497199229052247	7	0.4547901785413795	0.3485714203931645	ridge_mdtb4002_wb_indv_7_alpha_10	L2regression	glm7	sc1	sess	True	mdtb4002_wb_indv_7	cerebellum_suit	True	4	crossed	False	10	Tue Jul 13 10:41:40 2021
342	s09	0.3374506450134032	0.380297926211733	7	0.37326491206991497	0.2957007210193202	ridge_mdtb4002_wb_indv_7_alpha_10	L2regression	glm7	sc1	sess	True	mdtb4002_wb_indv_7	cerebellum_suit	True	4	crossed	False	10	Tue Jul 13 10:41:43 2021
343	s10	0.3788669637055384	0.44938187061105395	7	0.4171592601195643	0.277017970428395	ridge_mdtb4002_wb_indv_7_alpha_10	L2regression	glm7	sc1	sess	True	mdtb4002_wb_indv_7	cerebellum_suit	True	4	crossed	False	10	Tue Jul 13 10:41:45 2021
344	s12	0.37031357292746303	0.4034512230442885	7	0.4034488572563278	0.2690356094490669	ridge_mdtb4002_wb_indv_7_alpha_10	L2regression	glm7	sc1	sess	True	mdtb4002_wb_indv_7	cerebellum_suit	True	4	crossed	False	10	Tue Jul 13 10:41:47 2021
345	s15	0.3720713205904239	0.3526411173743418	7	0.3990026464518209	0.13413905455376818	ridge_mdtb4002_wb_indv_7_alpha_10	L2regression	glm7	sc1	sess	True	mdtb4002_wb_indv_7	cerebellum_suit	True	4	crossed	False	10	Tue Jul 13 10:41:49 2021
346	s17	0.3937151262612596	0.5582422387302153	7	0.4430493322590952	0.4062623909765467	ridge_mdtb4002_wb_indv_7_alpha_10	L2regression	glm7	sc1	sess	True	mdtb4002_wb_indv_7	cerebellum_suit	True	4	crossed	False	10	Tue Jul 13 10:41:52 2021
347	s18	0.3000963757150887	0.33939815109842125	7	0.3192968830690188	0.15829483614829135	ridge_mdtb4002_wb_indv_7_alpha_10	L2regression	glm7	sc1	sess	True	mdtb4002_wb_indv_7	cerebellum_suit	True	4	crossed	False	10	Tue Jul 13 10:41:54 2021
348	s19	0.2863508257288766	0.36740348491102376	7	0.3104413571077244	0.2351252678390756	ridge_mdtb4002_wb_indv_7_alpha_10	L2regression	glm7	sc1	sess	True	mdtb4002_wb_indv_7	cerebellum_suit	True	4	crossed	False	10	Tue Jul 13 10:41:57 2021
349	s20	0.3437257771324285	0.41227876642441785	7	0.3738051208185768	0.3580694039424521	ridge_mdtb4002_wb_indv_7_alpha_10	L2regression	glm7	sc1	sess	True	mdtb4002_wb_indv_7	cerebellum_suit	True	4	crossed	False	10	Tue Jul 13 10:41:59 2021
350	s24	0.3726946418268999	0.3628315538642452	7	0.4045014393629054	0.2577934273053621	ridge_mdtb4002_wb_indv_7_alpha_10	L2regression	glm7	sc1	sess	True	mdtb4002_wb_indv_7	cerebellum_suit	True	4	crossed	False	10	Tue Jul 13 10:42:02 2021
351	s25	0.3676495141830236	0.3679807236956436	7	0.3977744014903543	0.09954935475344484	ridge_mdtb4002_wb_indv_7_alpha_10	L2regression	glm7	sc1	sess	True	mdtb4002_wb_indv_7	cerebellum_suit	True	4	crossed	False	10	Tue Jul 13 10:42:03 2021
352	s27	0.34648178082720144	0.35497234285239754	7	0.3804704892070565	0.25238278971831424	ridge_mdtb4002_wb_indv_7_alpha_10	L2regression	glm7	sc1	sess	True	mdtb4002_wb_indv_7	cerebellum_suit	True	4	crossed	False	10	Tue Jul 13 10:42:05 2021
353	s28	0.3371006201211214	0.3571336363705434	7	0.3568963834828536	0.21676641320107468	ridge_mdtb4002_wb_indv_7_alpha_10	L2regression	glm7	sc1	sess	True	mdtb4002_wb_indv_7	cerebellum_suit	True	4	crossed	False	10	Tue Jul 13 10:42:11 2021
354	s29	0.4738082550974175	0.31604370232848034	7	0.5285915694684443	0.08426617585573527	ridge_mdtb4002_wb_indv_7_alpha_10	L2regression	glm7	sc1	sess	True	mdtb4002_wb_indv_7	cerebellum_suit	True	4	crossed	False	10	Tue Jul 13 10:42:14 2021
355	s30	0.4068716697138247	0.4307417412862338	7	0.4477128936261561	0.14143479767527306	ridge_mdtb4002_wb_indv_7_alpha_10	L2regression	glm7	sc1	sess	True	mdtb4002_wb_indv_7	cerebellum_suit	True	4	crossed	False	10	Tue Jul 13 10:42:16 2021
356	s31	0.3319842135781009	0.3509396904595079	7	0.3566453716336085	0.10459740197883724	ridge_mdtb4002_wb_indv_7_alpha_10	L2regression	glm7	sc1	sess	True	mdtb4002_wb_indv_7	cerebellum_suit	True	4	crossed	False	10	Tue Jul 13 10:42:18 2021
408	s02	0.008709538417237265	0.9997521301590396	250	0.4705236173569253	0.30395200728417193	ridge_arslan_250_alpha_-2	L2regression	glm7	sc1	sess	True	arslan_250	cerebellum_suit	True	4	crossed	False	-2	Mon Jun 28 18:43:45 2021
409	s03	0.011625711991109835	0.9996646630875676	250	0.5159474116583112	0.4174264618640587	ridge_arslan_250_alpha_-2	L2regression	glm7	sc1	sess	True	arslan_250	cerebellum_suit	True	4	crossed	False	-2	Mon Jun 28 18:43:47 2021
410	s09	0.01391364414731126	0.9993236617369572	250	0.4548481456527677	0.2945014570087997	ridge_arslan_250_alpha_-2	L2regression	glm7	sc1	sess	True	arslan_250	cerebellum_suit	True	4	crossed	False	-2	Mon Jun 28 18:43:52 2021
411	s10	0.01322526160502927	0.9995093256212424	250	0.527773336441926	0.3023698756392662	ridge_arslan_250_alpha_-2	L2regression	glm7	sc1	sess	True	arslan_250	cerebellum_suit	True	4	crossed	False	-2	Mon Jun 28 18:43:55 2021
412	s12	0.010118328656486902	0.9997005810702072	250	0.5360118694755754	0.2092444465773412	ridge_arslan_250_alpha_-2	L2regression	glm7	sc1	sess	True	arslan_250	cerebellum_suit	True	4	crossed	False	-2	Mon Jun 28 18:44:00 2021
413	s15	0.010965233068218996	0.9996268482187476	250	0.5155863550156772	0.21869890497021308	ridge_arslan_250_alpha_-2	L2regression	glm7	sc1	sess	True	arslan_250	cerebellum_suit	True	4	crossed	False	-2	Mon Jun 28 18:44:09 2021
414	s17	0.012069645098934696	0.9996085855034929	250	0.5428993513146634	0.33790639362732616	ridge_arslan_250_alpha_-2	L2regression	glm7	sc1	sess	True	arslan_250	cerebellum_suit	True	4	crossed	False	-2	Mon Jun 28 18:44:17 2021
415	s18	0.006533788263345117	0.9997985559933836	250	0.417801706873206	0.2059185065496124	ridge_arslan_250_alpha_-2	L2regression	glm7	sc1	sess	True	arslan_250	cerebellum_suit	True	4	crossed	False	-2	Mon Jun 28 18:44:25 2021
416	s19	0.010761587097218918	0.999418689995414	250	0.39809341462950026	0.2715283772864129	ridge_arslan_250_alpha_-2	L2regression	glm7	sc1	sess	True	arslan_250	cerebellum_suit	True	4	crossed	False	-2	Mon Jun 28 18:44:32 2021
417	s20	0.012727311206335057	0.9994236912661985	250	0.4711606180105247	0.2708309549669121	ridge_arslan_250_alpha_-2	L2regression	glm7	sc1	sess	True	arslan_250	cerebellum_suit	True	4	crossed	False	-2	Mon Jun 28 18:44:35 2021
418	s24	0.01287474048692659	0.9994963058317052	250	0.5605514429107048	0.16001824038703846	ridge_arslan_250_alpha_-2	L2regression	glm7	sc1	sess	True	arslan_250	cerebellum_suit	True	4	crossed	False	-2	Mon Jun 28 18:44:47 2021
419	s25	0.010123217223745332	0.9996840367013724	250	0.5117941518161414	0.17165999990708827	ridge_arslan_250_alpha_-2	L2regression	glm7	sc1	sess	True	arslan_250	cerebellum_suit	True	4	crossed	False	-2	Mon Jun 28 18:44:53 2021
420	s27	0.01577788184416525	0.9991075074580079	250	0.476991775559636	0.2613665532765319	ridge_arslan_250_alpha_-2	L2regression	glm7	sc1	sess	True	arslan_250	cerebellum_suit	True	4	crossed	False	-2	Mon Jun 28 18:44:55 2021
421	s28	0.009515382636398293	0.9996668499227422	250	0.4870707629196467	0.17112981359609875	ridge_arslan_250_alpha_-2	L2regression	glm7	sc1	sess	True	arslan_250	cerebellum_suit	True	4	crossed	False	-2	Mon Jun 28 18:45:00 2021
422	s29	0.014013864506686114	0.9996365048749948	250	0.6916156416330446	0.16506526394292093	ridge_arslan_250_alpha_-2	L2regression	glm7	sc1	sess	True	arslan_250	cerebellum_suit	True	4	crossed	False	-2	Mon Jun 28 18:45:05 2021
423	s30	0.0076501235103588906	0.9998527880016456	250	0.6300657672215519	0.09221263913411576	ridge_arslan_250_alpha_-2	L2regression	glm7	sc1	sess	True	arslan_250	cerebellum_suit	True	4	crossed	False	-2	Mon Jun 28 18:45:11 2021
424	s31	0.006120907211790149	0.999864572046238	250	0.5236893814820163	0.1127889001503412	ridge_arslan_250_alpha_-2	L2regression	glm7	sc1	sess	True	arslan_250	cerebellum_suit	True	4	crossed	False	-2	Mon Jun 28 18:45:17 2021
425	s02	0.042428252802177435	0.9939908986852783	250	0.4468496235032004	0.3222658365477716	ridge_arslan_250_alpha_0	L2regression	glm7	sc1	sess	True	arslan_250	cerebellum_suit	True	4	crossed	False	0	Mon Jun 28 18:45:26 2021
426	s03	0.05009773119014089	0.9937038771658404	250	0.4880074217895172	0.4397121524157664	ridge_arslan_250_alpha_0	L2regression	glm7	sc1	sess	True	arslan_250	cerebellum_suit	True	4	crossed	False	0	Mon Jun 28 18:45:28 2021
[truncated: 3,313 more rows]
