# Supplementary material for: A task-general connectivity model reveals variation in convergence of cortical inputs to functional regions of the cerebellum
Source: eLife. 2023 Apr 21;12:e81511. doi: 10.7554/eLife.81511 (PMC10129326; doi:10.7554/eLife.81511)
Supplement: Figure 2—source data 1. [file elife-81511-fig2-data1.csv]

rmse_eval	subj_id	num_regions	name	glm	train_exp	eval_exp	averaging	weighting	incl_inst	X_data	Y_data	mode	splitby	save_maps	threshold	R_eval	R2	noise_Y_R	noise_Y_R2	noise_X_R	noise_X_R2	timestamp
0.302788956497411	s02	7	ridge_yeo7_alpha_2	glm7	sc1	sc2	sess	True	True	yeo7	cerebellum_suit	crossed	all	True	0.1	0.213895210250317	0.011683127234989	0.250541465626943	-0.498917068746113	0.646489199307135	0.29297839861427	Mon Dec 6 02:58:31 2021
0.309721268189685	s03	7	ridge_yeo7_alpha_2	glm7	sc1	sc2	sess	True	True	yeo7	cerebellum_suit	crossed	all	True	0.1	0.279258944909245	0.048312990576518	0.269163903291232	-0.461672193417536	0.652384664700695	0.304769329401391	Mon Dec 6 02:58:31 2021
0.330087310370903	s04	7	ridge_yeo7_alpha_2	glm7	sc1	sc2	sess	True	True	yeo7	cerebellum_suit	crossed	all	True	0.1	0.101286043476988	-0.043284851905056	0.129791907993994	-0.740416184012013	0.58092798683298	0.161855973665959	Mon Dec 6 02:58:31 2021
0.307636748084667	s06	7	ridge_yeo7_alpha_2	glm7	sc1	sc2	sess	True	True	yeo7	cerebellum_suit	crossed	all	True	0.1	0.371538250398321	0.135570682970455	0.438928642287505	-0.12214271542499	0.788604766479592	0.577209532959184	Mon Dec 6 02:58:31 2021
0.341273883264303	s08	7	ridge_yeo7_alpha_2	glm7	sc1	sc2	sess	True	True	yeo7	cerebellum_suit	crossed	all	True	0.1	0.218174381258727	-0.005884126345004	0.216358495364167	-0.567283009271665	0.60048105148491	0.20096210296982	Mon Dec 6 02:58:32 2021
0.353127574567871	s09	7	ridge_yeo7_alpha_2	glm7	sc1	sc2	sess	True	True	yeo7	cerebellum_suit	crossed	all	True	0.1	0.280777056994781	0.061187547828002	0.372356589815305	-0.255286820369391	0.652063183985118	0.304126367970237	Mon Dec 6 02:58:32 2021
0.309499952663016	s10	7	ridge_yeo7_alpha_2	glm7	sc1	sc2	sess	True	True	yeo7	cerebellum_suit	crossed	all	True	0.1	0.307979128513037	0.084790677555852	0.299251181934321	-0.401497636131358	0.782046266889082	0.564092533778164	Mon Dec 6 02:58:32 2021
0.360105355328691	s12	7	ridge_yeo7_alpha_2	glm7	sc1	sc2	sess	True	True	yeo7	cerebellum_suit	crossed	all	True	0.1	0.275355996439174	0.043658661094689	0.24555591625875	-0.5088881674825	0.732582694702991	0.465165389405982	Mon Dec 6 02:58:32 2021
0.319238369230651	s14	7	ridge_yeo7_alpha_2	glm7	sc1	sc2	sess	True	True	yeo7	cerebellum_suit	crossed	all	True	0.1	0.127797117233394	-0.029554874962809	0.333939338007503	-0.332121323984993	0.79604585436262	0.59209170872524	Mon Dec 6 02:58:32 2021
0.347346130772682	s15	7	ridge_yeo7_alpha_2	glm7	sc1	sc2	sess	True	True	yeo7	cerebellum_suit	crossed	all	True	0.1	0.227405562187908	0.015022723623922	0.281911854547391	-0.436176290905218	0.743600208409573	0.487200416819145	Mon Dec 6 02:58:32 2021
0.383469972523519	s17	7	ridge_yeo7_alpha_2	glm7	sc1	sc2	sess	True	True	yeo7	cerebellum_suit	crossed	all	True	0.1	0.357673376216061	0.111385096874075	0.403711442324701	-0.192577115350598	0.7290303836716	0.4580607673432	Mon Dec 6 02:58:32 2021
0.294717433461826	s18	7	ridge_yeo7_alpha_2	glm7	sc1	sc2	sess	True	True	yeo7	cerebellum_suit	crossed	all	True	0.1	0.148909518756781	-0.045413938423182	0.215557982278809	-0.568884035442381	0.683122481804405	0.36624496360881	Mon Dec 6 02:58:32 2021
0.284184076742155	s19	7	ridge_yeo7_alpha_2	glm7	sc1	sc2	sess	True	True	yeo7	cerebellum_suit	crossed	all	True	0.1	0.212711061171065	0.009516662718009	0.254240109492353	-0.491519781015295	0.576460293983247	0.152920587966494	Mon Dec 6 02:58:32 2021
0.348092700056865	s20	7	ridge_yeo7_alpha_2	glm7	sc1	sc2	sess	True	True	yeo7	cerebellum_suit	crossed	all	True	0.1	0.251270308997343	0.026851519803872	0.325037423570484	-0.349925152859032	0.497954855579427	-0.004090288841147	Mon Dec 6 02:58:32 2021
0.338337526706515	s21	7	ridge_yeo7_alpha_2	glm7	sc1	sc2	sess	True	True	yeo7	cerebellum_suit	crossed	all	True	0.1	0.080341343391667	-0.079549173346674	0.195871779559683	-0.608256440880633	0.368090532513876	-0.263818934972249	Mon Dec 6 02:58:32 2021
0.350013340941351	s22	7	ridge_yeo7_alpha_2	glm7	sc1	sc2	sess	True	True	yeo7	cerebellum_suit	crossed	all	True	0.1	0.36126788274257	0.098446239520618	0.445329703945649	-0.109340592108703	0.689069223078181	0.378138446156361	Mon Dec 6 02:58:32 2021
0.369433602345595	s24	7	ridge_yeo7_alpha_2	glm7	sc1	sc2	sess	True	True	yeo7	cerebellum_suit	crossed	all	True	0.1	0.151676250911164	-0.024939584636525	0.206192914360851	-0.587614171278299	0.5308128783123	0.0616257566246	Mon Dec 6 02:58:32 2021
0.323874898867567	s25	7	ridge_yeo7_alpha_2	glm7	sc1	sc2	sess	True	True	yeo7	cerebellum_suit	crossed	all	True	0.1	0.238489811644127	0.005115931728945	0.280142802216838	-0.439714395566324	0.652791824615734	0.305583649231469	Mon Dec 6 02:58:32 2021
0.323575576866308	s26	7	ridge_yeo7_alpha_2	glm7	sc1	sc2	sess	True	True	yeo7	cerebellum_suit	crossed	all	True	0.1	0.215617775091806	-0.004542155415514	0.379621975955543	-0.240756048088914	0.55305449218675	0.106108984373499	Mon Dec 6 02:58:32 2021
0.339627908537187	s27	7	ridge_yeo7_alpha_2	glm7	sc1	sc2	sess	True	True	yeo7	cerebellum_suit	crossed	all	True	0.1	0.270645036166159	0.05879890580294	0.361738248230639	-0.276523503538723	0.635173872277284	0.270347744554568	Mon Dec 6 02:58:32 2021
0.341389413943069	s28	7	ridge_yeo7_alpha_2	glm7	sc1	sc2	sess	True	True	yeo7	cerebellum_suit	crossed	all	True	0.1	0.156578860623344	-0.009777387256835	0.187533468804654	-0.624933062390691	0.41066447213467	-0.178671055730661	Mon Dec 6 02:58:32 2021
0.45190504765071	s29	7	ridge_yeo7_alpha_2	glm7	sc1	sc2	sess	True	True	yeo7	cerebellum_suit	crossed	all	True	0.1	0.159993275052586	-0.018925567486459	0.208071450849161	-0.583857098301678	0.539419908975854	0.078839817951707	Mon Dec 6 02:58:32 2021
0.416448500020146	s30	7	ridge_yeo7_alpha_2	glm7	sc1	sc2	sess	True	True	yeo7	cerebellum_suit	crossed	all	True	0.1	0.113487080352037	-0.065560757607881	0.070360485085245	-0.859279029829511	0.573838874506317	0.147677749012633	Mon Dec 6 02:58:32 2021
0.36672250949255	s31	7	ridge_yeo7_alpha_2	glm7	sc1	sc2	sess	True	True	yeo7	cerebellum_suit	crossed	all	True	0.1	0.132089513826002	-0.063624712248442	0.113204759286153	-0.773590481427694	0.415422193625455	-0.169155612749089	Mon Dec 6 02:58:32 2021
0.300716034068023	s02	7	lasso_yeo7_alpha_-4	glm7	sc1	sc2	sess	True	True	yeo7	cerebellum_suit	crossed	all	True	0.1	0.214884580932432	0.02074920560576	0.250541465626943	-0.498917068746113	0.643312405939735	0.286624811879471	Mon Dec 6 02:33:01 2021
0.308608808770329	s03	7	lasso_yeo7_alpha_-4	glm7	sc1	sc2	sess	True	True	yeo7	cerebellum_suit	crossed	all	True	0.1	0.278635939271197	0.050141082663088	0.269163903291232	-0.461672193417536	0.671155210510292	0.342310421020584	Mon Dec 6 02:33:01 2021
0.326875348638604	s04	7	lasso_yeo7_alpha_-4	glm7	sc1	sc2	sess	True	True	yeo7	cerebellum_suit	crossed	all	True	0.1	0.095459704519288	-0.030775765609022	0.129791907993994	-0.740416184012013	0.562501484395208	0.125002968790417	Mon Dec 6 02:33:01 2021
0.30597748108825	s06	7	lasso_yeo7_alpha_-4	glm7	sc1	sc2	sess	True	True	yeo7	cerebellum_suit	crossed	all	True	0.1	0.377770161897404	0.142058840668694	0.438928642287505	-0.12214271542499	0.798819572963308	0.597639145926616	Mon Dec 6 02:33:01 2021
0.3368134788413	s08	7	lasso_yeo7_alpha_-4	glm7	sc1	sc2	sess	True	True	yeo7	cerebellum_suit	crossed	all	True	0.1	0.219498913041791	0.014387016616932	0.216358495364167	-0.567283009271665	0.596735087080237	0.193470174160473	Mon Dec 6 02:33:01 2021
0.350195887550543	s09	7	lasso_yeo7_alpha_-4	glm7	sc1	sc2	sess	True	True	yeo7	cerebellum_suit	crossed	all	True	0.1	0.28548641805129	0.072188884590156	0.372356589815305	-0.255286820369391	0.675424108273593	0.350848216547187	Mon Dec 6 02:33:01 2021
0.308201166938764	s10	7	lasso_yeo7_alpha_-4	glm7	sc1	sc2	sess	True	True	yeo7	cerebellum_suit	crossed	all	True	0.1	0.310177842296713	0.090482325309602	0.299251181934321	-0.401497636131359	0.784889965909522	0.569779931819045	Mon Dec 6 02:33:01 2021
0.356402423019373	s12	7	lasso_yeo7_alpha_-4	glm7	sc1	sc2	sess	True	True	yeo7	cerebellum_suit	crossed	all	True	0.1	0.278450251929814	0.057763889706133	0.24555591625875	-0.5088881674825	0.759223991577747	0.518447983155494	Mon Dec 6 02:33:01 2021
0.315308503391737	s14	7	lasso_yeo7_alpha_-4	glm7	sc1	sc2	sess	True	True	yeo7	cerebellum_suit	crossed	all	True	0.1	0.132237159885998	-0.012457935850813	0.333939338007503	-0.332121323984993	0.79450666519628	0.58901333039256	Mon Dec 6 02:33:01 2021
0.342278681316364	s15	7	lasso_yeo7_alpha_-4	glm7	sc1	sc2	sess	True	True	yeo7	cerebellum_suit	crossed	all	True	0.1	0.23423850186901	0.036969148817334	0.281911854547391	-0.436176290905218	0.758493531288699	0.516987062577397	Mon Dec 6 02:33:01 2021
0.381430001770946	s17	7	lasso_yeo7_alpha_-4	glm7	sc1	sc2	sess	True	True	yeo7	cerebellum_suit	crossed	all	True	0.1	0.360421834244001	0.118481819255553	0.403711442324702	-0.192577115350598	0.729485552741453	0.458971105482905	Mon Dec 6 02:33:01 2021
0.287893449121365	s18	7	lasso_yeo7_alpha_-4	glm7	sc1	sc2	sess	True	True	yeo7	cerebellum_suit	crossed	all	True	0.1	0.158449092253425	-0.003154950490931	0.215557982278809	-0.568884035442381	0.70735214479022	0.41470428958044	Mon Dec 6 02:33:01 2021
0.281997752101121	s19	7	lasso_yeo7_alpha_-4	glm7	sc1	sc2	sess	True	True	yeo7	cerebellum_suit	crossed	all	True	0.1	0.208359974880944	0.019850781353391	0.254240109492353	-0.491519781015295	0.579141010763728	0.158282021527456	Mon Dec 6 02:33:01 2021
0.346237759949438	s20	7	lasso_yeo7_alpha_-4	glm7	sc1	sc2	sess	True	True	yeo7	cerebellum_suit	crossed	all	True	0.1	0.247803386860708	0.03399632338817	0.325037423570484	-0.349925152859032	0.492843680756853	-0.014312638486295	Mon Dec 6 02:33:01 2021
0.33329215269733	s21	7	lasso_yeo7_alpha_-4	glm7	sc1	sc2	sess	True	True	yeo7	cerebellum_suit	crossed	all	True	0.1	0.079262171788824	-0.054662788477472	0.195871779559683	-0.608256440880633	0.353506206398012	-0.292987587203977	Mon Dec 6 02:33:01 2021
0.345260676990206	s22	7	lasso_yeo7_alpha_-4	glm7	sc1	sc2	sess	True	True	yeo7	cerebellum_suit	crossed	all	True	0.1	0.373683611800138	0.115807631591161	0.445329703945649	-0.109340592108703	0.703017560149589	0.406035120299178	Mon Dec 6 02:33:01 2021
0.366097716673553	s24	7	lasso_yeo7_alpha_-4	glm7	sc1	sc2	sess	True	True	yeo7	cerebellum_suit	crossed	all	True	0.1	0.15027648088538	-0.010983929254691	0.206192914360851	-0.587614171278299	0.511617525883099	0.023235051766199	Mon Dec 6 02:33:01 2021
0.320264078259312	s25	7	lasso_yeo7_alpha_-4	glm7	sc1	sc2	sess	True	True	yeo7	cerebellum_suit	crossed	all	True	0.1	0.239920965867568	0.022329478524337	0.280142802216838	-0.439714395566324	0.661302342916589	0.322604685833179	Mon Dec 6 02:33:01 2021
0.318225890596602	s26	7	lasso_yeo7_alpha_-4	glm7	sc1	sc2	sess	True	True	yeo7	cerebellum_suit	crossed	all	True	0.1	0.225765804423845	0.022000731116736	0.379621975955543	-0.240756048088914	0.563449808882089	0.126899617764179	Mon Dec 6 02:33:01 2021
0.337887242189263	s27	7	lasso_yeo7_alpha_-4	glm7	sc1	sc2	sess	True	True	yeo7	cerebellum_suit	crossed	all	True	0.1	0.272534426189642	0.065694080835029	0.361738248230639	-0.276523503538723	0.622155457595718	0.244310915191436	Mon Dec 6 02:33:01 2021
0.33664306770784	s28	7	lasso_yeo7_alpha_-4	glm7	sc1	sc2	sess	True	True	yeo7	cerebellum_suit	crossed	all	True	0.1	0.161444688456876	0.010965689200809	0.187533468804654	-0.624933062390691	0.452027316933622	-0.095945366132757	Mon Dec 6 02:33:01 2021
0.451011536492516	s29	7	lasso_yeo7_alpha_-4	glm7	sc1	sc2	sess	True	True	yeo7	cerebellum_suit	crossed	all	True	0.1	0.154769077392989	-0.021173139122656	0.208071450849161	-0.583857098301678	0.536203826404243	0.072407652808486	Mon Dec 6 02:33:01 2021
0.41156289685478	s30	7	lasso_yeo7_alpha_-4	glm7	sc1	sc2	sess	True	True	yeo7	cerebellum_suit	crossed	all	True	0.1	0.116071595114506	-0.048727653914587	0.070360485085245	-0.859279029829511	0.57005828422116	0.140116568442319	Mon Dec 6 02:33:01 2021
0.359243844188475	s31	7	lasso_yeo7_alpha_-4	glm7	sc1	sc2	sess	True	True	yeo7	cerebellum_suit	crossed	all	True	0.1	0.1339881518687	-0.02941695265519	0.113204759286153	-0.773590481427694	0.414454913331874	-0.171090173336252	Mon Dec 6 02:33:01 2021
0.298357142227638	s02	17	ridge_yeo17_alpha_4	glm7	sc1	sc2	sess	True	True	yeo17	cerebellum_suit	crossed	all	True	0.1	0.242791165614844	0.044364606418195	0.250541465626943	-0.498917068746113	0.628255301104117	0.256510602208233	Mon Dec 6 02:51:26 2021
0.303211135362631	s03	17	ridge_yeo17_alpha_4	glm7	sc1	sc2	sess	True	True	yeo17	cerebellum_suit	crossed	all	True	0.1	0.308218852870946	0.089672777129042	0.269163903291232	-0.461672193417536	0.710010887461399	0.420021774922798	Mon Dec 6 02:51:26 2021
0.325197240653087	s04	17	ridge_yeo17_alpha_4	glm7	sc1	sc2	sess	True	True	yeo17	cerebellum_suit	crossed	all	True	0.1	0.108916080298103	-0.016542285476337	0.129791907993994	-0.740416184012013	0.577846456571711	0.155692913143421	Mon Dec 6 02:51:26 2021
0.303947718043327	s06	17	ridge_yeo17_alpha_4	glm7	sc1	sc2	sess	True	True	yeo17	cerebellum_suit	crossed	all	True	0.1	0.397951720295565	0.158360316402683	0.438928642287505	-0.12214271542499	0.810443983914774	0.620887967829549	Mon Dec 6 02:51:26 2021
0.332443760198694	s08	17	ridge_yeo17_alpha_4	glm7	sc1	sc2	sess	True	True	yeo17	cerebellum_suit	crossed	all	True	0.1	0.241005811403137	0.045381810591477	0.216358495364167	-0.567283009271665	0.619804060340182	0.239608120680363	Mon Dec 6 02:51:26 2021
0.344882951622585	s09	17	ridge_yeo17_alpha_4	glm7	sc1	sc2	sess	True	True	yeo17	cerebellum_suit	crossed	all	True	0.1	0.322743261375417	0.103580310765386	0.372356589815305	-0.255286820369391	0.682382757677836	0.364765515355672	Mon Dec 6 02:51:26 2021
0.304883720468741	s10	17	ridge_yeo17_alpha_4	glm7	sc1	sc2	sess	True	True	yeo17	cerebellum_suit	crossed	all	True	0.1	0.337193925842099	0.112884703400247	0.299251181934321	-0.401497636131359	0.79775481780917	0.595509635618341	Mon Dec 6 02:51:26 2021
0.352969122234978	s12	17	ridge_yeo17_alpha_4	glm7	sc1	sc2	sess	True	True	yeo17	cerebellum_suit	crossed	all	True	0.1	0.299180457467554	0.080906390832663	0.24555591625875	-0.5088881674825	0.75949041138548	0.518980822770961	Mon Dec 6 02:51:26 2021
0.312534635831679	s14	17	ridge_yeo17_alpha_4	glm7	sc1	sc2	sess	True	True	yeo17	cerebellum_suit	crossed	all	True	0.1	0.14760669718276	0.007845142305542	0.333939338007503	-0.332121323984993	0.802426247788989	0.604852495577977	Mon Dec 6 02:51:26 2021
0.344232997577818	s15	17	ridge_yeo17_alpha_4	glm7	sc1	sc2	sess	True	True	yeo17	cerebellum_suit	crossed	all	True	0.1	0.221655894974782	0.028117374252528	0.281911854547391	-0.436176290905218	0.82115897004136	0.642317940082721	Mon Dec 6 02:51:26 2021
0.375156695267804	s17	17	ridge_yeo17_alpha_4	glm7	sc1	sc2	sess	True	True	yeo17	cerebellum_suit	crossed	all	True	0.1	0.390084898378105	0.149561553853517	0.403711442324702	-0.192577115350598	0.759347342925266	0.518694685850531	Mon Dec 6 02:51:26 2021
0.288016745158579	s18	17	ridge_yeo17_alpha_4	glm7	sc1	sc2	sess	True	True	yeo17	cerebellum_suit	crossed	all	True	0.1	0.180441407884504	0.00090305634945	0.215557982278809	-0.568884035442381	0.726048603097425	0.452097206194849	Mon Dec 6 02:51:26 2021
0.278393792618823	s19	17	ridge_yeo17_alpha_4	glm7	sc1	sc2	sess	True	True	yeo17	cerebellum_suit	crossed	all	True	0.1	0.241800234130422	0.052914240617165	0.254240109492353	-0.491519781015295	0.575765035346429	0.151530070692859	Mon Dec 6 02:51:26 2021
0.341729957626902	s20	17	ridge_yeo17_alpha_4	glm7	sc1	sc2	sess	True	True	yeo17	cerebellum_suit	crossed	all	True	0.1	0.276214928080527	0.065870436507747	0.325037423570484	-0.349925152859032	0.484163835398149	-0.031672329203702	Mon Dec 6 02:51:26 2021
0.333219035805411	s21	17	ridge_yeo17_alpha_4	glm7	sc1	sc2	sess	True	True	yeo17	cerebellum_suit	crossed	all	True	0.1	0.097381613615529	-0.049900086271378	0.195871779559683	-0.608256440880633	0.33957188094543	-0.32085623810914	Mon Dec 6 02:51:26 2021
0.339320637736408	s22	17	ridge_yeo17_alpha_4	glm7	sc1	sc2	sess	True	True	yeo17	cerebellum_suit	crossed	all	True	0.1	0.395026244445032	0.151190774054565	0.445329703945649	-0.109340592108703	0.708719116259293	0.417438232518585	Mon Dec 6 02:51:26 2021
0.366821389807245	s24	17	ridge_yeo17_alpha_4	glm7	sc1	sc2	sess	True	True	yeo17	cerebellum_suit	crossed	all	True	0.1	0.148201847849458	-0.014989742544925	0.206192914360851	-0.587614171278299	0.558967865008826	0.117935730017653	Mon Dec 6 02:51:26 2021
0.319850768564119	s25	17	ridge_yeo17_alpha_4	glm7	sc1	sc2	sess	True	True	yeo17	cerebellum_suit	crossed	all	True	0.1	0.244820934674145	0.03171320406982	0.280142802216838	-0.439714395566324	0.617887559749812	0.235775119499624	Mon Dec 6 02:51:26 2021
0.313209140353356	s26	17	ridge_yeo17_alpha_4	glm7	sc1	sc2	sess	True	True	yeo17	cerebellum_suit	crossed	all	True	0.1	0.265325059171541	0.059716973809287	0.379621975955543	-0.240756048088914	0.584990951330026	0.169981902660052	Mon Dec 6 02:51:26 2021
0.333976139881911	s27	17	ridge_yeo17_alpha_4	glm7	sc1	sc2	sess	True	True	yeo17	cerebellum_suit	crossed	all	True	0.1	0.303424295532264	0.088106826878651	0.361738248230639	-0.276523503538723	0.670535748119975	0.341071496239951	Mon Dec 6 02:51:26 2021
0.334870620621692	s28	17	ridge_yeo17_alpha_4	glm7	sc1	sc2	sess	True	True	yeo17	cerebellum_suit	crossed	all	True	0.1	0.18227818531112	0.024735956849543	0.187533468804654	-0.624933062390691	0.570536848016618	0.141073696033236	Mon Dec 6 02:51:26 2021
0.439639609008571	s29	17	ridge_yeo17_alpha_4	glm7	sc1	sc2	sess	True	True	yeo17	cerebellum_suit	crossed	all	True	0.1	0.223765512022435	0.041470912800088	0.208071450849161	-0.583857098301678	0.551319494525355	0.10263898905071	Mon Dec 6 02:51:26 2021
0.414168449250488	s30	17	ridge_yeo17_alpha_4	glm7	sc1	sc2	sess	True	True	yeo17	cerebellum_suit	crossed	all	True	0.1	0.116915164171641	-0.052839350258217	0.070360485085245	-0.859279029829511	0.457094511011398	-0.085810977977204	Mon Dec 6 02:51:26 2021
0.360194092844802	s31	17	ridge_yeo17_alpha_4	glm7	sc1	sc2	sess	True	True	yeo17	cerebellum_suit	crossed	all	True	0.1	0.140040148685601	-0.028405951145793	0.113204759286153	-0.773590481427694	0.461074266786357	-0.077851466427285	Mon Dec 6 02:51:26 2021
0.303291013103347	s02	17	lasso_yeo17_alpha_-4	glm7	sc1	sc2	sess	True	True	yeo17	cerebellum_suit	crossed	all	True	0.1	0.24110872877015	0.00552196157441	0.250541465626943	-0.498917068746113	0.62523855620073	0.25047711240146	Mon Dec 6 02:32:53 2021
0.310663344633951	s03	17	lasso_yeo17_alpha_-4	glm7	sc1	sc2	sess	True	True	yeo17	cerebellum_suit	crossed	all	True	0.1	0.29804063692142	0.033707432561703	0.269163903291232	-0.461672193417536	0.713323710124909	0.426647420249818	Mon Dec 6 02:32:53 2021
0.332281696494091	s04	17	lasso_yeo17_alpha_-4	glm7	sc1	sc2	sess	True	True	yeo17	cerebellum_suit	crossed	all	True	0.1	0.098689937249593	-0.074488488437488	0.129791907993994	-0.740416184012013	0.563310355869346	0.126620711738692	Mon Dec 6 02:32:54 2021
0.305917205791612	s06	17	lasso_yeo17_alpha_-4	glm7	sc1	sc2	sess	True	True	yeo17	cerebellum_suit	crossed	all	True	0.1	0.396246772251109	0.146572410740745	0.438928642287505	-0.12214271542499	0.813167163882941	0.626334327765883	Mon Dec 6 02:32:54 2021
0.34384872103605	s08	17	lasso_yeo17_alpha_-4	glm7	sc1	sc2	sess	True	True	yeo17	cerebellum_suit	crossed	all	True	0.1	0.230872288267702	-0.027290742745463	0.216358495364167	-0.567283009271665	0.609957840281692	0.219915680563385	Mon Dec 6 02:32:54 2021
0.348284690838309	s09	17	lasso_yeo17_alpha_-4	glm7	sc1	sc2	sess	True	True	yeo17	cerebellum_suit	crossed	all	True	0.1	0.331897345427377	0.08857404749147	0.372356589815305	-0.255286820369391	0.711270924029771	0.422541848059542	Mon Dec 6 02:32:54 2021
0.309377617858772	s10	17	lasso_yeo17_alpha_-4	glm7	sc1	sc2	sess	True	True	yeo17	cerebellum_suit	crossed	all	True	0.1	0.334077133682164	0.080511011228259	0.299251181934321	-0.401497636131359	0.778658466345196	0.557316932690393	Mon Dec 6 02:32:54 2021
0.360257066751764	s12	17	lasso_yeo17_alpha_-4	glm7	sc1	sc2	sess	True	True	yeo17	cerebellum_suit	crossed	all	True	0.1	0.292950007023251	0.034441672873482	0.24555591625875	-0.5088881674825	0.738231023303851	0.476462046607702	Mon Dec 6 02:32:54 2021
0.318726631358648	s14	17	lasso_yeo17_alpha_-4	glm7	sc1	sc2	sess	True	True	yeo17	cerebellum_suit	crossed	all	True	0.1	0.138419796845051	-0.035076370248242	0.333939338007503	-0.332121323984993	0.804238622639187	0.608477245278374	Mon Dec 6 02:32:54 2021
0.353605978572511	s15	17	lasso_yeo17_alpha_-4	glm7	sc1	sc2	sess	True	True	yeo17	cerebellum_suit	crossed	all	True	0.1	0.211519687596903	-0.036008629051466	0.281911854547391	-0.436176290905218	0.823583691632835	0.64716738326567	Mon Dec 6 02:32:54 2021
0.379600226087157	s17	17	lasso_yeo17_alpha_-4	glm7	sc1	sc2	sess	True	True	yeo17	cerebellum_suit	crossed	all	True	0.1	0.388345478730422	0.125852956689472	0.403711442324702	-0.192577115350598	0.763607278702938	0.527214557405875	Mon Dec 6 02:32:54 2021
0.293325213268251	s18	17	lasso_yeo17_alpha_-4	glm7	sc1	sc2	sess	True	True	yeo17	cerebellum_suit	crossed	all	True	0.1	0.173441196381853	-0.047684935437409	0.215557982278809	-0.568884035442381	0.706727876304934	0.413455752609869	Mon Dec 6 02:32:54 2021
0.280661822368316	s19	17	lasso_yeo17_alpha_-4	glm7	sc1	sc2	sess	True	True	yeo17	cerebellum_suit	crossed	all	True	0.1	0.235459329775337	0.03239048578817	0.254240109492353	-0.491519781015295	0.528383281038028	0.056766562076056	Mon Dec 6 02:32:54 2021
0.344099728952404	s20	17	lasso_yeo17_alpha_-4	glm7	sc1	sc2	sess	True	True	yeo17	cerebellum_suit	crossed	all	True	0.1	0.283304286782353	0.051429383445787	0.325037423570484	-0.349925152859032	0.547571501375675	0.095143002751351	Mon Dec 6 02:32:54 2021
0.346276770392933	s21	17	lasso_yeo17_alpha_-4	glm7	sc1	sc2	sess	True	True	yeo17	cerebellum_suit	crossed	all	True	0.1	0.096480094637966	-0.146361202923122	0.195871779559683	-0.608256440880633	0.373310542489697	-0.253378915020606	Mon Dec 6 02:32:54 2021
0.351917647732203	s22	17	lasso_yeo17_alpha_-4	glm7	sc1	sc2	sess	True	True	yeo17	cerebellum_suit	crossed	all	True	0.1	0.381220128495592	0.089359691497005	0.445329703945649	-0.109340592108703	0.709073490189562	0.418146980379123	Mon Dec 6 02:32:54 2021
0.377432682716648	s24	17	lasso_yeo17_alpha_-4	glm7	sc1	sc2	sess	True	True	yeo17	cerebellum_suit	crossed	all	True	0.1	0.131791862981457	-0.092364920282789	0.206192914360851	-0.587614171278299	0.658989639954298	0.317979279908596	Mon Dec 6 02:32:54 2021
0.327389906258814	s25	17	lasso_yeo17_alpha_-4	glm7	sc1	sc2	sess	True	True	yeo17	cerebellum_suit	crossed	all	True	0.1	0.242150928136635	-0.026792385881107	0.280142802216838	-0.439714395566324	0.642390115083657	0.284780230167313	Mon Dec 6 02:32:54 2021
0.319073763212519	s26	17	lasso_yeo17_alpha_-4	glm7	sc1	sc2	sess	True	True	yeo17	cerebellum_suit	crossed	all	True	0.1	0.263292534205814	0.021113575842236	0.379621975955543	-0.240756048088914	0.608904138471361	0.217808276942721	Mon Dec 6 02:32:54 2021
0.34049354118559	s27	17	lasso_yeo17_alpha_-4	glm7	sc1	sc2	sess	True	True	yeo17	cerebellum_suit	crossed	all	True	0.1	0.303606116990389	0.042153846849388	0.361738248230639	-0.276523503538723	0.775430910682317	0.550861821364634	Mon Dec 6 02:32:54 2021
0.33907618558085	s28	17	lasso_yeo17_alpha_-4	glm7	sc1	sc2	sess	True	True	yeo17	cerebellum_suit	crossed	all	True	0.1	0.174286532100105	-0.003611478021406	0.187533468804654	-0.624933062390691	0.519346246961447	0.038692493922893	Mon Dec 6 02:32:55 2021
0.45392122333359	s29	17	lasso_yeo17_alpha_-4	glm7	sc1	sc2	sess	True	True	yeo17	cerebellum_suit	crossed	all	True	0.1	0.225233894112123	-0.043208158412809	0.208071450849161	-0.583857098301678	0.587190980075346	0.174381960150692	Mon Dec 6 02:32:55 2021
0.426919256245675	s30	17	lasso_yeo17_alpha_-4	glm7	sc1	sc2	sess	True	True	yeo17	cerebellum_suit	crossed	all	True	0.1	0.113718447132476	-0.125310911372612	0.070360485085245	-0.859279029829511	0.453101233318685	-0.09379753336263	Mon Dec 6 02:32:55 2021
0.369059598671051	s31	17	lasso_yeo17_alpha_-4	glm7	sc1	sc2	sess	True	True	yeo17	cerebellum_suit	crossed	all	True	0.1	0.127084226964369	-0.102093385496226	0.113204759286153	-0.773590481427694	0.449718576449721	-0.100562847100558	Mon Dec 6 02:32:55 2021
0.294093568388358	s02	1848	ridge_tessels1002_alpha_8	glm7	sc1	sc2	sess	True	True	tessels1002	cerebellum_suit	crossed	all	True	0.1	0.300761475330969	0.07804070665226	0.250541465626943	-0.498917068746113	0.708882152523628	0.417764305047257	Mon Dec 6 02:48:04 2021
0.30043099075913	s03	1848	ridge_tessels1002_alpha_8	glm7	sc1	sc2	sess	True	True	tessels1002	cerebellum_suit	crossed	all	True	0.1	0.350447342902528	0.108078827320698	0.269163903291232	-0.461672193417536	0.801709158109311	0.603418316218623	Mon Dec 6 02:48:04 2021
0.326079298677356	s04	1848	ridge_tessels1002_alpha_8	glm7	sc1	sc2	sess	True	True	tessels1002	cerebellum_suit	crossed	all	True	0.1	0.128899988926206	-0.022879163100764	0.129791907993994	-0.740416184012013	0.689930145726687	0.379860291453373	Mon Dec 6 02:48:04 2021
0.30428043578634	s06	1848	ridge_tessels1002_alpha_8	glm7	sc1	sc2	sess	True	True	tessels1002	cerebellum_suit	crossed	all	True	0.1	0.401378794236074	0.157834922659955	0.438928642287505	-0.12214271542499	0.843334904850631	0.686669809701262	Mon Dec 6 02:48:04 2021
0.332023976371548	s08	1848	ridge_tessels1002_alpha_8	glm7	sc1	sc2	sess	True	True	tessels1002	cerebellum_suit	crossed	all	True	0.1	0.272306629414401	0.050988527065425	0.216358495364167	-0.567283009271665	0.688867704104762	0.377735408209524	Mon Dec 6 02:48:04 2021
0.340352700071583	s09	1848	ridge_tessels1002_alpha_8	glm7	sc1	sc2	sess	True	True	tessels1002	cerebellum_suit	crossed	all	True	0.1	0.370613188734422	0.135470867171199	0.372356589815305	-0.255286820369391	0.773891275638563	0.547782551277125	Mon Dec 6 02:48:04 2021
0.300332692817841	s10	1848	ridge_tessels1002_alpha_8	glm7	sc1	sc2	sess	True	True	tessels1002	cerebellum_suit	crossed	all	True	0.1	0.385357686499788	0.142738466056913	0.299251181934321	-0.401497636131359	0.857185584468823	0.714371168937647	Mon Dec 6 02:48:04 2021
0.355309044149426	s12	1848	ridge_tessels1002_alpha_8	glm7	sc1	sc2	sess	True	True	tessels1002	cerebellum_suit	crossed	all	True	0.1	0.323346676554065	0.068609501103405	0.24555591625875	-0.5088881674825	0.849532313759712	0.699064627519425	Mon Dec 6 02:48:04 2021
0.31161633125943	s14	1848	ridge_tessels1002_alpha_8	glm7	sc1	sc2	sess	True	True	tessels1002	cerebellum_suit	crossed	all	True	0.1	0.17178561801115	0.014396831022609	0.333939338007503	-0.332121323984993	0.850113709306224	0.700227418612449	Mon Dec 6 02:48:04 2021
0.344262581692243	s15	1848	ridge_tessels1002_alpha_8	glm7	sc1	sc2	sess	True	True	tessels1002	cerebellum_suit	crossed	all	True	0.1	0.240685625970126	0.024716717121014	0.281911854547391	-0.436176290905218	0.842361993204011	0.684723986408022	Mon Dec 6 02:48:04 2021
0.368846251562012	s17	1848	ridge_tessels1002_alpha_8	glm7	sc1	sc2	sess	True	True	tessels1002	cerebellum_suit	crossed	all	True	0.1	0.43088921120206	0.184511776919792	0.403711442324702	-0.192577115350598	0.827587947473633	0.655175894947266	Mon Dec 6 02:48:04 2021
0.288430380387636	s18	1848	ridge_tessels1002_alpha_8	glm7	sc1	sc2	sess	True	True	tessels1002	cerebellum_suit	crossed	all	True	0.1	0.203591913187524	-0.002346375778236	0.215557982278809	-0.568884035442381	0.728596788559706	0.457193577119412	Mon Dec 6 02:48:04 2021
0.277244721858784	s19	1848	ridge_tessels1002_alpha_8	glm7	sc1	sc2	sess	True	True	tessels1002	cerebellum_suit	crossed	all	True	0.1	0.280456210159256	0.065629454787158	0.254240109492353	-0.491519781015295	0.769778140784154	0.539556281568309	Mon Dec 6 02:48:04 2021
0.33804186805702	s20	1848	ridge_tessels1002_alpha_8	glm7	sc1	sc2	sess	True	True	tessels1002	cerebellum_suit	crossed	all	True	0.1	0.330015943629175	0.093580361974188	0.325037423570484	-0.349925152859032	0.600988808040493	0.201977616080987	Mon Dec 6 02:48:04 2021
0.331509433956762	s21	1848	ridge_tessels1002_alpha_8	glm7	sc1	sc2	sess	True	True	tessels1002	cerebellum_suit	crossed	all	True	0.1	0.142583066349752	-0.034981218150468	0.195871779559683	-0.608256440880633	0.509073271450177	0.018146542900353	Mon Dec 6 02:48:04 2021
0.330684894139788	s22	1848	ridge_tessels1002_alpha_8	glm7	sc1	sc2	sess	True	True	tessels1002	cerebellum_suit	crossed	all	True	0.1	0.457378449561157	0.205704517514597	0.445329703945649	-0.109340592108703	0.8061128021447	0.6122256042894	Mon Dec 6 02:48:04 2021
0.362571392346606	s24	1848	ridge_tessels1002_alpha_8	glm7	sc1	sc2	sess	True	True	tessels1002	cerebellum_suit	crossed	all	True	0.1	0.209388815026759	0.00643003846238	0.206192914360851	-0.587614171278299	0.670278886368637	0.340557772737274	Mon Dec 6 02:48:04 2021
0.318555491807192	s25	1848	ridge_tessels1002_alpha_8	glm7	sc1	sc2	sess	True	True	tessels1002	cerebellum_suit	crossed	all	True	0.1	0.277075183397675	0.043836730577656	0.280142802216838	-0.439714395566324	0.689077450881477	0.378154901762954	Mon Dec 6 02:48:04 2021
0.308955407304993	s26	1848	ridge_tessels1002_alpha_8	glm7	sc1	sc2	sess	True	True	tessels1002	cerebellum_suit	crossed	all	True	0.1	0.327652563957682	0.090653470730549	0.379621975955543	-0.240756048088914	0.696349141304824	0.392698282609648	Mon Dec 6 02:48:04 2021
0.332885573438303	s27	1848	ridge_tessels1002_alpha_8	glm7	sc1	sc2	sess	True	True	tessels1002	cerebellum_suit	crossed	all	True	0.1	0.329608966146432	0.092182939218065	0.361738248230639	-0.276523503538723	0.800565972651008	0.601131945302015	Mon Dec 6 02:48:04 2021
0.334383442563196	s28	1848	ridge_tessels1002_alpha_8	glm7	sc1	sc2	sess	True	True	tessels1002	cerebellum_suit	crossed	all	True	0.1	0.217927911281433	0.02918359022049	0.187533468804654	-0.624933062390691	0.690238817554406	0.380477635108811	Mon Dec 6 02:48:04 2021
0.439020098650493	s29	1848	ridge_tessels1002_alpha_8	glm7	sc1	sc2	sess	True	True	tessels1002	cerebellum_suit	crossed	all	True	0.1	0.260918330969102	0.045860040393115	0.208071450849161	-0.583857098301678	0.677941794044874	0.355883588089748	Mon Dec 6 02:48:04 2021
0.412892276651018	s30	1848	ridge_tessels1002_alpha_8	glm7	sc1	sc2	sess	True	True	tessels1002	cerebellum_suit	crossed	all	True	0.1	0.133897560975778	-0.049068184114875	0.070360485085245	-0.859279029829511	0.55807101366814	0.116142027336279	Mon Dec 6 02:48:04 2021
0.358109926223016	s31	1848	ridge_tessels1002_alpha_8	glm7	sc1	sc2	sess	True	True	tessels1002	cerebellum_suit	crossed	all	True	0.1	0.176485438098021	-0.017098807771611	0.113204759286153	-0.773590481427694	0.569551267118963	0.139102534237927	Mon Dec 6 02:48:04 2021
0.294365930235278	s02	1848	lasso_tessels1002_alpha_-2	glm7	sc1	sc2	sess	True	True	tessels1002	cerebellum_suit	crossed	all	True	0.1	0.272199918621757	0.072768101874798	0.250541465626943	-0.498917068746113	0.659660294094689	0.319320588189378	Mon Dec 6 02:30:42 2021
0.30242858659854	s03	1848	lasso_tessels1002_alpha_-2	glm7	sc1	sc2	sess	True	True	tessels1002	cerebellum_suit	crossed	all	True	0.1	0.323552559331467	0.097418348037179	0.269163903291232	-0.461672193417536	0.740887976617315	0.481775953234629	Mon Dec 6 02:30:44 2021
0.325281393236213	s04	1848	lasso_tessels1002_alpha_-2	glm7	sc1	sc2	sess	True	True	tessels1002	cerebellum_suit	crossed	all	True	0.1	0.068746074145738	-0.028749998394047	0.129791907993994	-0.740416184012013	0.421050184576727	-0.157899630846547	Mon Dec 6 02:30:45 2021
0.308289494867671	s06	1848	lasso_tessels1002_alpha_-2	glm7	sc1	sc2	sess	True	True	tessels1002	cerebellum_suit	crossed	all	True	0.1	0.359895712485871	0.129523593168803	0.438928642287505	-0.12214271542499	0.81478923206878	0.62957846413756	Mon Dec 6 02:30:46 2021
0.331483326846343	s08	1848	lasso_tessels1002_alpha_-2	glm7	sc1	sc2	sess	True	True	tessels1002	cerebellum_suit	crossed	all	True	0.1	0.229417625833915	0.047289948738688	0.216358495364167	-0.567283009271665	0.547325333517131	0.094650667034262	Mon Dec 6 02:30:47 2021
0.345823229563282	s09	1848	lasso_tessels1002_alpha_-2	glm7	sc1	sc2	sess	True	True	tessels1002	cerebellum_suit	crossed	all	True	0.1	0.325234323240715	0.104899354322178	0.372356589815305	-0.255286820369391	0.704151088199429	0.408302176398858	Mon Dec 6 02:30:48 2021
0.302714349490682	s10	1848	lasso_tessels1002_alpha_-2	glm7	sc1	sc2	sess	True	True	tessels1002	cerebellum_suit	crossed	all	True	0.1	0.359662768294063	0.129330073977805	0.299251181934321	-0.401497636131359	0.815886427585984	0.631772855171968	Mon Dec 6 02:30:49 2021
0.354253452917963	s12	1848	lasso_tessels1002_alpha_-2	glm7	sc1	sc2	sess	True	True	tessels1002	cerebellum_suit	crossed	all	True	0.1	0.277320690799101	0.069192674496976	0.24555591625875	-0.5088881674825	0.759383706094814	0.518767412189627	Mon Dec 6 02:30:50 2021
0.312217053312427	s14	1848	lasso_tessels1002_alpha_-2	glm7	sc1	sc2	sess	True	True	tessels1002	cerebellum_suit	crossed	all	True	0.1	0.117848649450565	-0.000829848149792	0.333939338007503	-0.332121323984993	0.790347272811459	0.580694545622919	Mon Dec 6 02:30:51 2021
0.339645700468694	s15	1848	lasso_tessels1002_alpha_-2	glm7	sc1	sc2	sess	True	True	tessels1002	cerebellum_suit	crossed	all	True	0.1	0.214999945993657	0.041865398809177	0.281911854547391	-0.436176290905218	0.72623807597573	0.452476151951461	Mon Dec 6 02:30:52 2021
0.372884294941812	s17	1848	lasso_tessels1002_alpha_-2	glm7	sc1	sc2	sess	True	True	tessels1002	cerebellum_suit	crossed	all	True	0.1	0.401541144881097	0.161002264287455	0.403711442324702	-0.192577115350598	0.794660552513654	0.589321105027309	Mon Dec 6 02:30:53 2021
0.284108759692726	s18	1848	lasso_tessels1002_alpha_-2	glm7	sc1	sc2	sess	True	True	tessels1002	cerebellum_suit	crossed	all	True	0.1	0.162965409351444	0.024412847786295	0.215557982278809	-0.568884035442381	0.671085221120889	0.342170442241778	Mon Dec 6 02:30:54 2021
0.279100869765824	s19	1848	lasso_tessels1002_alpha_-2	glm7	sc1	sc2	sess	True	True	tessels1002	cerebellum_suit	crossed	all	True	0.1	0.22894081124663	0.052206157531712	0.254240109492353	-0.491519781015295	0.717441808700533	0.434883617401066	Mon Dec 6 02:30:54 2021
0.339549622067959	s20	1848	lasso_tessels1002_alpha_-2	glm7	sc1	sc2	sess	True	True	tessels1002	cerebellum_suit	crossed	all	True	0.1	0.279029880532664	0.076749232382458	0.325037423570484	-0.349925152859032	0.597591221117706	0.195182442235412	Mon Dec 6 02:30:55 2021
0.326137889092337	s21	1848	lasso_tessels1002_alpha_-2	glm7	sc1	sc2	sess	True	True	tessels1002	cerebellum_suit	crossed	all	True	0.1	0.105584548286315	-0.01467184807856	0.195871779559683	-0.608256440880633	0.353716841111277	-0.292566317777445	Mon Dec 6 02:30:56 2021
0.330828973345577	s22	1848	lasso_tessels1002_alpha_-2	glm7	sc1	sc2	sess	True	True	tessels1002	cerebellum_suit	crossed	all	True	0.1	0.45428631443505	0.20631193943473	0.445329703945649	-0.109340592108703	0.795411317038129	0.590822634076258	Mon Dec 6 02:30:57 2021
0.359824519903514	s24	1848	lasso_tessels1002_alpha_-2	glm7	sc1	sc2	sess	True	True	tessels1002	cerebellum_suit	crossed	all	True	0.1	0.177903244008643	0.019014219993062	0.206192914360851	-0.587614171278299	0.609935611589268	0.219871223178536	Mon Dec 6 02:30:58 2021
0.31562884664394	s25	1848	lasso_tessels1002_alpha_-2	glm7	sc1	sc2	sess	True	True	tessels1002	cerebellum_suit	crossed	all	True	0.1	0.237605060461145	0.050598722819769	0.280142802216838	-0.439714395566324	0.628868508128239	0.257737016256479	Mon Dec 6 02:30:59 2021
0.309192521200417	s26	1848	lasso_tessels1002_alpha_-2	glm7	sc1	sc2	sess	True	True	tessels1002	cerebellum_suit	crossed	all	True	0.1	0.291630936418178	0.085009906431401	0.379621975955543	-0.240756048088914	0.674074203081311	0.348148406162623	Mon Dec 6 02:31:00 2021
0.334807374134688	s27	1848	lasso_tessels1002_alpha_-2	glm7	sc1	sc2	sess	True	True	tessels1002	cerebellum_suit	crossed	all	True	0.1	0.288825011743402	0.082333222151825	0.361738248230639	-0.276523503538723	0.702638415136495	0.405276830272989	Mon Dec 6 02:31:01 2021
0.334320069109258	s28	1848	lasso_tessels1002_alpha_-2	glm7	sc1	sc2	sess	True	True	tessels1002	cerebellum_suit	crossed	all	True	0.1	0.165473218189217	0.022296876940844	0.187533468804654	-0.624933062390691	0.52934646574556	0.05869293149112	Mon Dec 6 02:31:02 2021
0.445021659190872	s29	1848	lasso_tessels1002_alpha_-2	glm7	sc1	sc2	sess	True	True	tessels1002	cerebellum_suit	crossed	all	True	0.1	0.203066002145014	0.001579642385758	0.208071450849161	-0.583857098301678	0.579059126931378	0.158118253862756	Mon Dec 6 02:31:02 2021
0.406121523836522	s30	1848	lasso_tessels1002_alpha_-2	glm7	sc1	sc2	sess	True	True	tessels1002	cerebellum_suit	crossed	all	True	0.1	0.107752228554655	-0.036304244481594	0.070360485085245	-0.859279029829511	0.401388369547361	-0.197223260905277	Mon Dec 6 02:31:03 2021
0.351696317982175	s31	1848	lasso_tessels1002_alpha_-2	glm7	sc1	sc2	sess	True	True	tessels1002	cerebellum_suit	crossed	all	True	0.1	0.141045885353264	0.005767519605801	0.113204759286153	-0.773590481427694	0.460590935718904	-0.078818128562191	Mon Dec 6 02:31:04 2021
0.293236356121033	s02	1190	ridge_tessels0642_alpha_8	glm7	sc1	sc2	sess	True	True	tessels0642	cerebellum_suit	crossed	all	True	0.1	0.297374110157558	0.082281769535694	0.250541465626943	-0.498917068746113	0.697856227062955	0.39571245412591	Mon Dec 6 02:45:03 2021
0.298887803962601	s03	1190	ridge_tessels0642_alpha_8	glm7	sc1	sc2	sess	True	True	tessels0642	cerebellum_suit	crossed	all	True	0.1	0.348856293031306	0.115425696729576	0.269163903291232	-0.461672193417536	0.788287711366605	0.576575422733209	Mon Dec 6 02:45:03 2021
0.323715001001003	s04	1190	ridge_tessels0642_alpha_8	glm7	sc1	sc2	sess	True	True	tessels0642	cerebellum_suit	crossed	all	True	0.1	0.132923370685974	-0.008823177380995	0.129791907993994	-0.740416184012013	0.659648687247464	0.319297374494927	Mon Dec 6 02:45:03 2021
0.302235994543239	s06	1190	ridge_tessels0642_alpha_8	glm7	sc1	sc2	sess	True	True	tessels0642	cerebellum_suit	crossed	all	True	0.1	0.410136999346219	0.168145600094836	0.438928642287505	-0.12214271542499	0.84053719842491	0.68107439684982	Mon Dec 6 02:45:03 2021
0.329289378672076	s08	1190	ridge_tessels0642_alpha_8	glm7	sc1	sc2	sess	True	True	tessels0642	cerebellum_suit	crossed	all	True	0.1	0.274382070360012	0.064732794530757	0.216358495364167	-0.567283009271665	0.681563095268285	0.36312619053657	Mon Dec 6 02:45:03 2021
0.339169834511755	s09	1190	ridge_tessels0642_alpha_8	glm7	sc1	sc2	sess	True	True	tessels0642	cerebellum_suit	crossed	all	True	0.1	0.370996266828002	0.137634942417708	0.372356589815305	-0.255286820369391	0.765354929575919	0.530709859151839	Mon Dec 6 02:45:03 2021
0.299047684970308	s10	1190	ridge_tessels0642_alpha_8	glm7	sc1	sc2	sess	True	True	tessels0642	cerebellum_suit	crossed	all	True	0.1	0.387103731587254	0.148962336416391	0.299251181934321	-0.401497636131359	0.860430127151633	0.720860254303265	Mon Dec 6 02:45:03 2021
0.351218465420139	s12	1190	ridge_tessels0642_alpha_8	glm7	sc1	sc2	sess	True	True	tessels0642	cerebellum_suit	crossed	all	True	0.1	0.327000759130457	0.089930576087033	0.24555591625875	-0.5088881674825	0.848191924801465	0.69638384960293	Mon Dec 6 02:45:03 2021
0.309523729559717	s14	1190	ridge_tessels0642_alpha_8	glm7	sc1	sc2	sess	True	True	tessels0642	cerebellum_suit	crossed	all	True	0.1	0.177970662047366	0.024701180519708	0.333939338007503	-0.332121323984993	0.842780542148511	0.685561084297021	Mon Dec 6 02:45:03 2021
0.3405862776678	s15	1190	ridge_tessels0642_alpha_8	glm7	sc1	sc2	sess	True	True	tessels0642	cerebellum_suit	crossed	all	True	0.1	0.247394279716772	0.044319662681939	0.281911854547391	-0.436176290905218	0.844056659131805	0.688113318263609	Mon Dec 6 02:45:03 2021
0.367921637601811	s17	1190	ridge_tessels0642_alpha_8	glm7	sc1	sc2	sess	True	True	tessels0642	cerebellum_suit	crossed	all	True	0.1	0.431318568234438	0.186034055495844	0.403711442324702	-0.192577115350598	0.818877728666406	0.637755457332813	Mon Dec 6 02:45:03 2021
0.285470640173376	s18	1190	ridge_tessels0642_alpha_8	glm7	sc1	sc2	sess	True	True	tessels0642	cerebellum_suit	crossed	all	True	0.1	0.208471893363958	0.017820365337316	0.215557982278809	-0.568884035442381	0.732189754460083	0.464379508920166	Mon Dec 6 02:45:03 2021
0.275802719993391	s19	1190	ridge_tessels0642_alpha_8	glm7	sc1	sc2	sess	True	True	tessels0642	cerebellum_suit	crossed	all	True	0.1	0.282018367636456	0.074640428988646	0.254240109492353	-0.491519781015295	0.746821719689286	0.493643439378571	Mon Dec 6 02:45:03 2021
0.33712245725069	s20	1190	ridge_tessels0642_alpha_8	glm7	sc1	sc2	sess	True	True	tessels0642	cerebellum_suit	crossed	all	True	0.1	0.32511403920152	0.096681771738196	0.325037423570484	-0.349925152859032	0.57716740913101	0.154334818262021	Mon Dec 6 02:45:03 2021
0.328195150382039	s21	1190	ridge_tessels0642_alpha_8	glm7	sc1	sc2	sess	True	True	tessels0642	cerebellum_suit	crossed	all	True	0.1	0.142484816618761	-0.016838415411171	0.195871779559683	-0.608256440880633	0.499152788466911	-0.001694423066178	Mon Dec 6 02:45:03 2021
0.328626536457625	s22	1190	ridge_tessels0642_alpha_8	glm7	sc1	sc2	sess	True	True	tessels0642	cerebellum_suit	crossed	all	True	0.1	0.459987818533839	0.211373488697989	0.445329703945649	-0.109340592108703	0.808490439813999	0.616980879627998	Mon Dec 6 02:45:03 2021
0.360518985910469	s24	1190	ridge_tessels0642_alpha_8	glm7	sc1	sc2	sess	True	True	tessels0642	cerebellum_suit	crossed	all	True	0.1	0.206262126319713	0.017542830858045	0.206192914360851	-0.587614171278299	0.644608682561236	0.289217365122472	Mon Dec 6 02:45:03 2021
0.316457261163421	s25	1190	ridge_tessels0642_alpha_8	glm7	sc1	sc2	sess	True	True	tessels0642	cerebellum_suit	crossed	all	True	0.1	0.27494490911714	0.055247518501935	0.280142802216838	-0.439714395566324	0.677029998391374	0.354059996782749	Mon Dec 6 02:45:03 2021
0.306571136577058	s26	1190	ridge_tessels0642_alpha_8	glm7	sc1	sc2	sess	True	True	tessels0642	cerebellum_suit	crossed	all	True	0.1	0.332376911766543	0.104055303704487	0.379621975955543	-0.240756048088914	0.687584646332366	0.375169292664732	Mon Dec 6 02:45:03 2021
0.331344243518987	s27	1190	ridge_tessels0642_alpha_8	glm7	sc1	sc2	sess	True	True	tessels0642	cerebellum_suit	crossed	all	True	0.1	0.327544075770956	0.101062727926444	0.361738248230639	-0.276523503538723	0.756868753515097	0.513737507030194	Mon Dec 6 02:45:03 2021
0.331744091560851	s28	1190	ridge_tessels0642_alpha_8	glm7	sc1	sc2	sess	True	True	tessels0642	cerebellum_suit	crossed	all	True	0.1	0.222122542955239	0.042468500213031	0.187533468804654	-0.624933062390691	0.690807334109583	0.381614668219166	Mon Dec 6 02:45:03 2021
0.436570839844649	s29	1190	ridge_tessels0642_alpha_8	glm7	sc1	sc2	sess	True	True	tessels0642	cerebellum_suit	crossed	all	True	0.1	0.258249362503543	0.055964304243149	0.208071450849161	-0.583857098301678	0.666086231061442	0.332172462122883	Mon Dec 6 02:45:03 2021
0.40852079953912	s30	1190	ridge_tessels0642_alpha_8	glm7	sc1	sc2	sess	True	True	tessels0642	cerebellum_suit	crossed	all	True	0.1	0.136047362679032	-0.028747377252637	0.070360485085245	-0.859279029829511	0.568913122616964	0.137826245233928	Mon Dec 6 02:45:03 2021
0.355270570191408	s31	1190	ridge_tessels0642_alpha_8	glm7	sc1	sc2	sess	True	True	tessels0642	cerebellum_suit	crossed	all	True	0.1	0.174243896908433	-0.002357808554112	0.113204759286153	-0.773590481427694	0.552169425805804	0.104338851611609	Mon Dec 6 02:45:03 2021
0.300516023179781	s02	1190	lasso_tessels0642_alpha_-3	glm7	sc1	sc2	sess	True	True	tessels0642	cerebellum_suit	crossed	all	True	0.1	0.277617224913434	0.028058149497647	0.250541465626943	-0.498917068746113	0.608010865455109	0.216021730910218	Mon Dec 6 02:29:04 2021
0.312682548593233	s03	1190	lasso_tessels0642_alpha_-3	glm7	sc1	sc2	sess	True	True	tessels0642	cerebellum_suit	crossed	all	True	0.1	0.314195157102996	0.009878449701699	0.269163903291232	-0.461672193417536	0.698452437647061	0.396904875294123	Mon Dec 6 02:29:04 2021
0.339024625732678	s04	1190	lasso_tessels0642_alpha_-3	glm7	sc1	sc2	sess	True	True	tessels0642	cerebellum_suit	crossed	all	True	0.1	0.092025034047943	-0.131052841234153	0.129791907993994	-0.740416184012013	0.491675334114472	-0.016649331771056	Mon Dec 6 02:29:05 2021
0.312072978878507	s06	1190	lasso_tessels0642_alpha_-3	glm7	sc1	sc2	sess	True	True	tessels0642	cerebellum_suit	crossed	all	True	0.1	0.358497503221312	0.096283431668096	0.438928642287505	-0.12214271542499	0.793440097175826	0.586880194351652	Mon Dec 6 02:29:06 2021
0.352154219095874	s08	1190	lasso_tessels0642_alpha_-3	glm7	sc1	sc2	sess	True	True	tessels0642	cerebellum_suit	crossed	all	True	0.1	0.242734236541762	-0.088388750899136	0.216358495364167	-0.567283009271665	0.576839910259428	0.153679820518856	Mon Dec 6 02:29:06 2021
0.35021651381454	s09	1190	lasso_tessels0642_alpha_-3	glm7	sc1	sc2	sess	True	True	tessels0642	cerebellum_suit	crossed	all	True	0.1	0.325726898902353	0.074083502269098	0.372356589815305	-0.255286820369391	0.602017363724881	0.204034727449763	Mon Dec 6 02:29:07 2021
0.308734864381287	s10	1190	lasso_tessels0642_alpha_-3	glm7	sc1	sc2	sess	True	True	tessels0642	cerebellum_suit	crossed	all	True	0.1	0.354693609122206	0.083613362546223	0.299251181934321	-0.401497636131359	0.784586196434163	0.569172392868327	Mon Dec 6 02:29:08 2021
0.374666551024623	s12	1190	lasso_tessels0642_alpha_-3	glm7	sc1	sc2	sess	True	True	tessels0642	cerebellum_suit	crossed	all	True	0.1	0.269086572598825	-0.066565302173695	0.24555591625875	-0.5088881674825	0.702672945629911	0.405345891259822	Mon Dec 6 02:29:08 2021
0.321968919586937	s14	1190	lasso_tessels0642_alpha_-3	glm7	sc1	sc2	sess	True	True	tessels0642	cerebellum_suit	crossed	all	True	0.1	0.141875554771095	-0.059912607101036	0.333939338007503	-0.332121323984993	0.762465781806915	0.52493156361383	Mon Dec 6 02:29:09 2021
0.357221309111045	s15	1190	lasso_tessels0642_alpha_-3	glm7	sc1	sc2	sess	True	True	tessels0642	cerebellum_suit	crossed	all	True	0.1	0.194920316669207	-0.073848288077622	0.281911854547391	-0.436176290905218	0.705019787410851	0.410039574821702	Mon Dec 6 02:29:10 2021
0.37927804563603	s17	1190	lasso_tessels0642_alpha_-3	glm7	sc1	sc2	sess	True	True	tessels0642	cerebellum_suit	crossed	all	True	0.1	0.391770922516297	0.120122021499752	0.403711442324702	-0.192577115350598	0.745431662452379	0.490863324904759	Mon Dec 6 02:29:10 2021
0.294359161152228	s18	1190	lasso_tessels0642_alpha_-3	glm7	sc1	sc2	sess	True	True	tessels0642	cerebellum_suit	crossed	all	True	0.1	0.174720343219087	-0.06139271690174	0.215557982278809	-0.568884035442381	0.624499293880303	0.248998587760606	Mon Dec 6 02:29:11 2021
0.281779077176573	s19	1190	lasso_tessels0642_alpha_-3	glm7	sc1	sc2	sess	True	True	tessels0642	cerebellum_suit	crossed	all	True	0.1	0.234653152374423	0.01461572106338	0.254240109492353	-0.491519781015295	0.708925757959543	0.417851515919086	Mon Dec 6 02:29:11 2021
0.343305216789237	s20	1190	lasso_tessels0642_alpha_-3	glm7	sc1	sc2	sess	True	True	tessels0642	cerebellum_suit	crossed	all	True	0.1	0.312075924043044	0.05114783662254	0.325037423570484	-0.349925152859032	0.579640055980674	0.159280111961348	Mon Dec 6 02:29:12 2021
0.346174447784889	s21	1190	lasso_tessels0642_alpha_-3	glm7	sc1	sc2	sess	True	True	tessels0642	cerebellum_suit	crossed	all	True	0.1	0.12695343453491	-0.14294516785786	0.195871779559683	-0.608256440880633	0.440588676521463	-0.118822646957074	Mon Dec 6 02:29:12 2021
0.344861543395238	s22	1190	lasso_tessels0642_alpha_-3	glm7	sc1	sc2	sess	True	True	tessels0642	cerebellum_suit	crossed	all	True	0.1	0.424489796892023	0.126712166057032	0.445329703945649	-0.109340592108703	0.740465480969578	0.480930961939156	Mon Dec 6 02:29:13 2021
0.371845754682236	s24	1190	lasso_tessels0642_alpha_-3	glm7	sc1	sc2	sess	True	True	tessels0642	cerebellum_suit	crossed	all	True	0.1	0.19277169438393	-0.061738339279097	0.206192914360851	-0.587614171278299	0.554006826159371	0.108013652318742	Mon Dec 6 02:29:14 2021
0.333232317128609	s25	1190	lasso_tessels0642_alpha_-3	glm7	sc1	sc2	sess	True	True	tessels0642	cerebellum_suit	crossed	all	True	0.1	0.228226079312876	-0.066662744867282	0.280142802216838	-0.439714395566324	0.52092928147861	0.041858562957221	Mon Dec 6 02:29:14 2021
0.31820022085569	s26	1190	lasso_tessels0642_alpha_-3	glm7	sc1	sc2	sess	True	True	tessels0642	cerebellum_suit	crossed	all	True	0.1	0.279956556894794	0.012298787995646	0.379621975955543	-0.240756048088914	0.587560493603475	0.17512098720695	Mon Dec 6 02:29:15 2021
0.342357024021625	s27	1190	lasso_tessels0642_alpha_-3	glm7	sc1	sc2	sess	True	True	tessels0642	cerebellum_suit	crossed	all	True	0.1	0.301681855641709	0.024019223984797	0.361738248230639	-0.276523503538723	0.639631260192097	0.279262520384193	Mon Dec 6 02:29:15 2021
0.345703774934021	s28	1190	lasso_tessels0642_alpha_-3	glm7	sc1	sc2	sess	True	True	tessels0642	cerebellum_suit	crossed	all	True	0.1	0.167774895468996	-0.054872593921577	0.187533468804654	-0.624933062390691	0.476404745522993	-0.047190508954013	Mon Dec 6 02:29:16 2021
0.471617689894283	s29	1190	lasso_tessels0642_alpha_-3	glm7	sc1	sc2	sess	True	True	tessels0642	cerebellum_suit	crossed	all	True	0.1	0.212885248037616	-0.146144976280537	0.208071450849161	-0.583857098301678	0.560462615001193	0.120925230002387	Mon Dec 6 02:29:16 2021
0.429677707373272	s30	1190	lasso_tessels0642_alpha_-3	glm7	sc1	sc2	sess	True	True	tessels0642	cerebellum_suit	crossed	all	True	0.1	0.12097974803347	-0.151702380719495	0.070360485085245	-0.859279029829511	0.382196072780546	-0.235607854438907	Mon Dec 6 02:29:17 2021
0.368813403773524	s31	1190	lasso_tessels0642_alpha_-3	glm7	sc1	sc2	sess	True	True	tessels0642	cerebellum_suit	crossed	all	True	0.1	0.145255551295736	-0.11799232418159	0.113204759286153	-0.773590481427694	0.408954561823805	-0.182090876352389	Mon Dec 6 02:29:18 2021
0.302022244709578	s02	670	ridge_tessels0362_alpha_6	glm7	sc1	sc2	sess	True	True	tessels0362	cerebellum_suit	crossed	all	True	0.1	0.291742419124403	0.030209630568628	0.250541465626943	-0.498917068746113	0.680181796744375	0.360363593488751	Mon Dec 6 02:44:44 2021
0.313508460410193	s03	670	ridge_tessels0362_alpha_6	glm7	sc1	sc2	sess	True	True	tessels0362	cerebellum_suit	crossed	all	True	0.1	0.323936493728352	0.031236057748428	0.269163903291232	-0.461672193417536	0.792560598772487	0.585121197544973	Mon Dec 6 02:44:44 2021
0.337016193018817	s04	670	ridge_tessels0362_alpha_6	glm7	sc1	sc2	sess	True	True	tessels0362	cerebellum_suit	crossed	all	True	0.1	0.120010353717742	-0.088909929386331	0.129791907993994	-0.740416184012013	0.683710334332818	0.367420668665637	Mon Dec 6 02:44:44 2021
0.31680076985601	s06	670	ridge_tessels0362_alpha_6	glm7	sc1	sc2	sess	True	True	tessels0362	cerebellum_suit	crossed	all	True	0.1	0.365139800530059	0.088084711059369	0.438928642287505	-0.12214271542499	0.831298688068832	0.662597376137664	Mon Dec 6 02:44:44 2021
0.348216309096496	s08	670	ridge_tessels0362_alpha_6	glm7	sc1	sc2	sess	True	True	tessels0362	cerebellum_suit	crossed	all	True	0.1	0.249098027710925	-0.039230539333173	0.216358495364167	-0.567283009271665	0.650438645361202	0.300877290722405	Mon Dec 6 02:44:44 2021
0.350138014011774	s09	670	ridge_tessels0362_alpha_6	glm7	sc1	sc2	sess	True	True	tessels0362	cerebellum_suit	crossed	all	True	0.1	0.352732731914737	0.093046693071571	0.372356589815305	-0.255286820369391	0.73991465098892	0.479829301977839	Mon Dec 6 02:44:44 2021
0.308079810570976	s10	670	ridge_tessels0362_alpha_6	glm7	sc1	sc2	sess	True	True	tessels0362	cerebellum_suit	crossed	all	True	0.1	0.370967783766371	0.101306410537324	0.299251181934321	-0.401497636131359	0.831187016354049	0.662374032708098	Mon Dec 6 02:44:44 2021
0.374274883899285	s12	670	ridge_tessels0362_alpha_6	glm7	sc1	sc2	sess	True	True	tessels0362	cerebellum_suit	crossed	all	True	0.1	0.298658585538725	-0.035229678622505	0.24555591625875	-0.5088881674825	0.820587466589949	0.641174933179898	Mon Dec 6 02:44:44 2021
0.323498935472245	s14	670	ridge_tessels0362_alpha_6	glm7	sc1	sc2	sess	True	True	tessels0362	cerebellum_suit	crossed	all	True	0.1	0.155514272798277	-0.049500187039708	0.333939338007503	-0.332121323984993	0.849155380144169	0.698310760288337	Mon Dec 6 02:44:44 2021
0.359374374479208	s15	670	ridge_tessels0362_alpha_6	glm7	sc1	sc2	sess	True	True	tessels0362	cerebellum_suit	crossed	all	True	0.1	0.215885425069822	-0.059288780299142	0.281911854547391	-0.436176290905218	0.805751199919213	0.611502399838427	Mon Dec 6 02:44:44 2021
0.380375997889387	s17	670	ridge_tessels0362_alpha_6	glm7	sc1	sc2	sess	True	True	tessels0362	cerebellum_suit	crossed	all	True	0.1	0.40496720137475	0.138701608961245	0.403711442324702	-0.192577115350598	0.806486777841924	0.612973555683849	Mon Dec 6 02:44:44 2021
0.301683260831327	s18	670	ridge_tessels0362_alpha_6	glm7	sc1	sc2	sess	True	True	tessels0362	cerebellum_suit	crossed	all	True	0.1	0.179895495141184	-0.09657574280716	0.215557982278809	-0.568884035442381	0.690681893040963	0.381363786081926	Mon Dec 6 02:44:44 2021
0.288179006798273	s19	670	ridge_tessels0362_alpha_6	glm7	sc1	sc2	sess	True	True	tessels0362	cerebellum_suit	crossed	all	True	0.1	0.243428750384899	-0.011272446575715	0.254240109492353	-0.491519781015295	0.742857867014685	0.485715734029369	Mon Dec 6 02:44:44 2021
0.34443123345818	s20	670	ridge_tessels0362_alpha_6	glm7	sc1	sc2	sess	True	True	tessels0362	cerebellum_suit	crossed	all	True	0.1	0.32639581469317	0.063104898628789	0.325037423570484	-0.349925152859032	0.630865066100728	0.261730132201457	Mon Dec 6 02:44:44 2021
0.345494412532482	s21	670	ridge_tessels0362_alpha_6	glm7	sc1	sc2	sess	True	True	tessels0362	cerebellum_suit	crossed	all	True	0.1	0.133137219764569	-0.11960348016796	0.195871779559683	-0.608256440880633	0.523275881974762	0.046551763949524	Mon Dec 6 02:44:44 2021
0.347203314502353	s22	670	ridge_tessels0362_alpha_6	glm7	sc1	sc2	sess	True	True	tessels0362	cerebellum_suit	crossed	all	True	0.1	0.42407227843431	0.133980414463035	0.445329703945649	-0.109340592108703	0.780943848182593	0.561887696365186	Mon Dec 6 02:44:44 2021
0.374125884538686	s24	670	ridge_tessels0362_alpha_6	glm7	sc1	sc2	sess	True	True	tessels0362	cerebellum_suit	crossed	all	True	0.1	0.195402371582491	-0.055589155442808	0.206192914360851	-0.587614171278299	0.673952168675686	0.347904337351372	Mon Dec 6 02:44:44 2021
0.330834976603349	s25	670	ridge_tessels0362_alpha_6	glm7	sc1	sc2	sess	True	True	tessels0362	cerebellum_suit	crossed	all	True	0.1	0.263817265452947	-0.028409283644187	0.280142802216838	-0.439714395566324	0.671250089692234	0.342500179384467	Mon Dec 6 02:44:44 2021
0.323446337294134	s26	670	ridge_tessels0362_alpha_6	glm7	sc1	sc2	sess	True	True	tessels0362	cerebellum_suit	crossed	all	True	0.1	0.285375997198891	0.002168956651886	0.379621975955543	-0.240756048088914	0.646349619084683	0.292699238169366	Mon Dec 6 02:44:44 2021
0.34469809604421	s27	670	ridge_tessels0362_alpha_6	glm7	sc1	sc2	sess	True	True	tessels0362	cerebellum_suit	crossed	all	True	0.1	0.315007888699746	0.025138252880834	0.361738248230639	-0.276523503538723	0.818291281131399	0.636582562262798	Mon Dec 6 02:44:44 2021
0.345584764109769	s28	670	ridge_tessels0362_alpha_6	glm7	sc1	sc2	sess	True	True	tessels0362	cerebellum_suit	crossed	all	True	0.1	0.200662403396389	-0.030905290012868	0.187533468804654	-0.624933062390691	0.617978109439999	0.235956218879998	Mon Dec 6 02:44:44 2021
0.455273517058411	s29	670	ridge_tessels0362_alpha_6	glm7	sc1	sc2	sess	True	True	tessels0362	cerebellum_suit	crossed	all	True	0.1	0.24863360908933	-0.027379961407158	0.208071450849161	-0.583857098301678	0.655487667597462	0.310975335194924	Mon Dec 6 02:44:44 2021
0.430889786988876	s30	670	ridge_tessels0362_alpha_6	glm7	sc1	sc2	sess	True	True	tessels0362	cerebellum_suit	crossed	all	True	0.1	0.130593068910607	-0.131592744387115	0.070360485085245	-0.859279029829511	0.489585631686187	-0.020828736627627	Mon Dec 6 02:44:44 2021
0.375301432624597	s31	670	ridge_tessels0362_alpha_6	glm7	sc1	sc2	sess	True	True	tessels0362	cerebellum_suit	crossed	all	True	0.1	0.15957855807177	-0.117011400745807	0.113204759286153	-0.773590481427694	0.526691919146103	0.053383838292206	Mon Dec 6 02:44:44 2021
0.300519416496532	s02	670	lasso_tessels0362_alpha_-3	glm7	sc1	sc2	sess	True	True	tessels0362	cerebellum_suit	crossed	all	True	0.1	0.275524390733556	0.026388171029479	0.250541465626943	-0.498917068746113	0.589553920995382	0.179107841990764	Mon Dec 6 02:27:50 2021
0.311913438091299	s03	670	lasso_tessels0362_alpha_-3	glm7	sc1	sc2	sess	True	True	tessels0362	cerebellum_suit	crossed	all	True	0.1	0.312777715196855	0.015188824247696	0.269163903291232	-0.461672193417536	0.723308879578669	0.446617759157338	Mon Dec 6 02:27:51 2021
0.336023532480362	s04	670	lasso_tessels0362_alpha_-3	glm7	sc1	sc2	sess	True	True	tessels0362	cerebellum_suit	crossed	all	True	0.1	0.096276461361484	-0.108608793682856	0.129791907993994	-0.740416184012013	0.539058102133177	0.078116204266354	Mon Dec 6 02:27:51 2021
0.312524191196054	s06	670	lasso_tessels0362_alpha_-3	glm7	sc1	sc2	sess	True	True	tessels0362	cerebellum_suit	crossed	all	True	0.1	0.354189077960193	0.08958746242726	0.438928642287505	-0.12214271542499	0.803556963349828	0.607113926699656	Mon Dec 6 02:27:51 2021
0.34770244520135	s08	670	lasso_tessels0362_alpha_-3	glm7	sc1	sc2	sess	True	True	tessels0362	cerebellum_suit	crossed	all	True	0.1	0.245022995074302	-0.058453426809931	0.216358495364167	-0.567283009271665	0.572336409798382	0.144672819596763	Mon Dec 6 02:27:52 2021
0.352096353536519	s09	670	lasso_tessels0362_alpha_-3	glm7	sc1	sc2	sess	True	True	tessels0362	cerebellum_suit	crossed	all	True	0.1	0.313382769025709	0.06350103242995	0.372356589815305	-0.255286820369391	0.568984585762646	0.137969171525291	Mon Dec 6 02:27:52 2021
0.307040883525324	s10	670	lasso_tessels0362_alpha_-3	glm7	sc1	sc2	sess	True	True	tessels0362	cerebellum_suit	crossed	all	True	0.1	0.352457808168166	0.093838142939994	0.299251181934321	-0.401497636131359	0.759676584951771	0.519353169903543	Mon Dec 6 02:27:53 2021
0.369924654770879	s12	670	lasso_tessels0362_alpha_-3	glm7	sc1	sc2	sess	True	True	tessels0362	cerebellum_suit	crossed	all	True	0.1	0.273238094036904	-0.037956570360146	0.24555591625875	-0.5088881674825	0.724899324448284	0.449798648896568	Mon Dec 6 02:27:53 2021
0.320742051967818	s14	670	lasso_tessels0362_alpha_-3	glm7	sc1	sc2	sess	True	True	tessels0362	cerebellum_suit	crossed	all	True	0.1	0.132661420228254	-0.053929098578457	0.333939338007503	-0.332121323984993	0.782348896042446	0.564697792084892	Mon Dec 6 02:27:53 2021
0.355019900563646	s15	670	lasso_tessels0362_alpha_-3	glm7	sc1	sc2	sess	True	True	tessels0362	cerebellum_suit	crossed	all	True	0.1	0.197660151260547	-0.059287724095777	0.281911854547391	-0.436176290905218	0.732078572115746	0.464157144231492	Mon Dec 6 02:27:54 2021
0.378159992295508	s17	670	lasso_tessels0362_alpha_-3	glm7	sc1	sc2	sess	True	True	tessels0362	cerebellum_suit	crossed	all	True	0.1	0.391931347212133	0.124256903645982	0.403711442324702	-0.192577115350598	0.757300415224093	0.514600830448185	Mon Dec 6 02:27:54 2021
0.29169312749463	s18	670	lasso_tessels0362_alpha_-3	glm7	sc1	sc2	sess	True	True	tessels0362	cerebellum_suit	crossed	all	True	0.1	0.182874812820242	-0.039553500759014	0.215557982278809	-0.568884035442381	0.656911482744331	0.313822965488661	Mon Dec 6 02:27:54 2021
0.280250731980324	s19	670	lasso_tessels0362_alpha_-3	glm7	sc1	sc2	sess	True	True	tessels0362	cerebellum_suit	crossed	all	True	0.1	0.243568738006736	0.030436211702638	0.254240109492353	-0.491519781015295	0.707477994590321	0.414955989180643	Mon Dec 6 02:27:55 2021
0.341546496981467	s20	670	lasso_tessels0362_alpha_-3	glm7	sc1	sc2	sess	True	True	tessels0362	cerebellum_suit	crossed	all	True	0.1	0.309702156204723	0.061898632462064	0.325037423570484	-0.349925152859032	0.576908678497763	0.153817356995526	Mon Dec 6 02:27:55 2021
0.346327755724541	s21	670	lasso_tessels0362_alpha_-3	glm7	sc1	sc2	sess	True	True	tessels0362	cerebellum_suit	crossed	all	True	0.1	0.1170290642797	-0.147190320903299	0.195871779559683	-0.608256440880633	0.404068142812699	-0.191863714374602	Mon Dec 6 02:27:55 2021
0.342884365847891	s22	670	lasso_tessels0362_alpha_-3	glm7	sc1	sc2	sess	True	True	tessels0362	cerebellum_suit	crossed	all	True	0.1	0.42516658841692	0.137818997887539	0.445329703945649	-0.109340592108703	0.745915999687335	0.491831999374669	Mon Dec 6 02:27:56 2021
0.371605560548939	s24	670	lasso_tessels0362_alpha_-3	glm7	sc1	sc2	sess	True	True	tessels0362	cerebellum_suit	crossed	all	True	0.1	0.172693166934609	-0.062943079031061	0.206192914360851	-0.587614171278299	0.597180310003853	0.194360620007705	Mon Dec 6 02:27:56 2021
0.327966851587136	s25	670	lasso_tessels0362_alpha_-3	glm7	sc1	sc2	sess	True	True	tessels0362	cerebellum_suit	crossed	all	True	0.1	0.244781182724412	-0.032268964530165	0.280142802216838	-0.439714395566324	0.601022302333346	0.202044604666693	Mon Dec 6 02:27:56 2021
0.318491523446881	s26	670	lasso_tessels0362_alpha_-3	glm7	sc1	sc2	sess	True	True	tessels0362	cerebellum_suit	crossed	all	True	0.1	0.269972733570358	0.008046174491765	0.379621975955543	-0.240756048088914	0.610237432974416	0.220474865948832	Mon Dec 6 02:27:57 2021
0.33853813782806	s27	670	lasso_tessels0362_alpha_-3	glm7	sc1	sc2	sess	True	True	tessels0362	cerebellum_suit	crossed	all	True	0.1	0.311329682897791	0.047144012000026	0.361738248230639	-0.276523503538723	0.706133272316877	0.412266544633754	Mon Dec 6 02:27:57 2021
0.343274625570065	s28	670	lasso_tessels0362_alpha_-3	glm7	sc1	sc2	sess	True	True	tessels0362	cerebellum_suit	crossed	all	True	0.1	0.178507527428039	-0.037573472585081	0.187533468804654	-0.624933062390691	0.484773384634397	-0.030453230731206	Mon Dec 6 02:27:57 2021
0.469360247387675	s29	670	lasso_tessels0362_alpha_-3	glm7	sc1	sc2	sess	True	True	tessels0362	cerebellum_suit	crossed	all	True	0.1	0.20642281742282	-0.138468724242761	0.208071450849161	-0.583857098301678	0.580392621964942	0.160785243929885	Mon Dec 6 02:27:58 2021
0.430533742000522	s30	670	lasso_tessels0362_alpha_-3	glm7	sc1	sc2	sess	True	True	tessels0362	cerebellum_suit	crossed	all	True	0.1	0.112943368869112	-0.162413885110065	0.070360485085245	-0.859279029829511	0.385884869136035	-0.228230261727931	Mon Dec 6 02:27:58 2021
0.368143041343038	s31	670	lasso_tessels0362_alpha_-3	glm7	sc1	sc2	sess	True	True	tessels0362	cerebellum_suit	crossed	all	True	0.1	0.147888157112528	-0.110288546074939	0.113204759286153	-0.773590481427694	0.44375597787675	-0.1124880442465	Mon Dec 6 02:27:58 2021
0.297290201158947	s02	304	ridge_tessels0162_alpha_6	glm7	sc1	sc2	sess	True	True	tessels0162	cerebellum_suit	crossed	all	True	0.1	0.292593292306042	0.058477634503233	0.250541465626943	-0.498917068746113	0.683309998401017	0.366619996802034	Mon Dec 6 02:44:43 2021
0.304899497017724	s03	304	ridge_tessels0162_alpha_6	glm7	sc1	sc2	sess	True	True	tessels0162	cerebellum_suit	crossed	all	True	0.1	0.332735896442592	0.080679548600706	0.269163903291232	-0.461672193417536	0.776987790043475	0.55397558008695	Mon Dec 6 02:44:43 2021
0.32829489880175	s04	304	ridge_tessels0162_alpha_6	glm7	sc1	sc2	sess	True	True	tessels0162	cerebellum_suit	crossed	all	True	0.1	0.12739834085562	-0.035206122559341	0.129791907993994	-0.740416184012013	0.643891505460875	0.287783010921749	Mon Dec 6 02:44:43 2021
0.307563680221564	s06	304	ridge_tessels0162_alpha_6	glm7	sc1	sc2	sess	True	True	tessels0162	cerebellum_suit	crossed	all	True	0.1	0.390621046429804	0.140846627724858	0.438928642287505	-0.12214271542499	0.829342983031743	0.658685966063485	Mon Dec 6 02:44:43 2021
0.336742580266146	s08	304	ridge_tessels0162_alpha_6	glm7	sc1	sc2	sess	True	True	tessels0162	cerebellum_suit	crossed	all	True	0.1	0.262171055703589	0.025123384999191	0.216358495364167	-0.567283009271665	0.67058901041537	0.34117802083074	Mon Dec 6 02:44:43 2021
0.343260791019966	s09	304	ridge_tessels0162_alpha_6	glm7	sc1	sc2	sess	True	True	tessels0162	cerebellum_suit	crossed	all	True	0.1	0.362274736334595	0.123086148544791	0.372356589815305	-0.255286820369391	0.754216731753168	0.508433463506335	Mon Dec 6 02:44:43 2021
0.301342066026066	s10	304	ridge_tessels0162_alpha_6	glm7	sc1	sc2	sess	True	True	tessels0162	cerebellum_suit	crossed	all	True	0.1	0.384655213461058	0.137926957862208	0.299251181934321	-0.401497636131359	0.847119847399102	0.694239694798203	Mon Dec 6 02:44:43 2021
0.358983396361687	s12	304	ridge_tessels0162_alpha_6	glm7	sc1	sc2	sess	True	True	tessels0162	cerebellum_suit	crossed	all	True	0.1	0.315616069840807	0.050730151699908	0.24555591625875	-0.5088881674825	0.820343233369259	0.640686466738519	Mon Dec 6 02:44:43 2021
0.315878257482024	s14	304	ridge_tessels0162_alpha_6	glm7	sc1	sc2	sess	True	True	tessels0162	cerebellum_suit	crossed	all	True	0.1	0.166231271182481	-0.008106974086878	0.333939338007503	-0.332121323984993	0.839741161614554	0.679482323229109	Mon Dec 6 02:44:43 2021
0.349730275201151	s15	304	ridge_tessels0162_alpha_6	glm7	sc1	sc2	sess	True	True	tessels0162	cerebellum_suit	crossed	all	True	0.1	0.226521123111953	-0.004927986531599	0.281911854547391	-0.436176290905218	0.827877098660751	0.655754197321502	Mon Dec 6 02:44:43 2021
0.373307985544677	s17	304	ridge_tessels0162_alpha_6	glm7	sc1	sc2	sess	True	True	tessels0162	cerebellum_suit	crossed	all	True	0.1	0.418952574302902	0.167987978320221	0.403711442324702	-0.192577115350598	0.812040914669758	0.624081829339517	Mon Dec 6 02:44:43 2021
0.292682839250888	s18	304	ridge_tessels0162_alpha_6	glm7	sc1	sc2	sess	True	True	tessels0162	cerebellum_suit	crossed	all	True	0.1	0.193082794985771	-0.032312212742373	0.215557982278809	-0.568884035442381	0.699751645701835	0.39950329140367	Mon Dec 6 02:44:43 2021
0.279692501283151	s19	304	ridge_tessels0162_alpha_6	glm7	sc1	sc2	sess	True	True	tessels0162	cerebellum_suit	crossed	all	True	0.1	0.267564363498027	0.047861680331534	0.254240109492353	-0.491519781015295	0.742901052592146	0.485802105184292	Mon Dec 6 02:44:43 2021
0.34060091642259	s20	304	ridge_tessels0162_alpha_6	glm7	sc1	sc2	sess	True	True	tessels0162	cerebellum_suit	crossed	all	True	0.1	0.320913843094175	0.08022081284735	0.325037423570484	-0.349925152859032	0.577524514407277	0.155049028814554	Mon Dec 6 02:44:43 2021
0.336906319956595	s21	304	ridge_tessels0162_alpha_6	glm7	sc1	sc2	sess	True	True	tessels0162	cerebellum_suit	crossed	all	True	0.1	0.13109485337671	-0.069043632215988	0.195871779559683	-0.608256440880633	0.467628109883502	-0.064743780232997	Mon Dec 6 02:44:43 2021
0.334875580315873	s22	304	ridge_tessels0162_alpha_6	glm7	sc1	sc2	sess	True	True	tessels0162	cerebellum_suit	crossed	all	True	0.1	0.446657478073563	0.188651856466896	0.445329703945649	-0.109340592108703	0.793959967744968	0.587919935489935	Mon Dec 6 02:44:43 2021
0.366352766088741	s24	304	ridge_tessels0162_alpha_6	glm7	sc1	sc2	sess	True	True	tessels0162	cerebellum_suit	crossed	all	True	0.1	0.197411946323769	-0.014153617970695	0.206192914360851	-0.587614171278299	0.659705996181733	0.319411992363467	Mon Dec 6 02:44:43 2021
0.32304522273239	s25	304	ridge_tessels0162_alpha_6	glm7	sc1	sc2	sess	True	True	tessels0162	cerebellum_suit	crossed	all	True	0.1	0.272679589005752	0.017891015088373	0.280142802216838	-0.439714395566324	0.671851657084778	0.343703314169557	Mon Dec 6 02:44:43 2021
0.313193667886062	s26	304	ridge_tessels0162_alpha_6	glm7	sc1	sc2	sess	True	True	tessels0162	cerebellum_suit	crossed	all	True	0.1	0.311954984223395	0.066471616994906	0.379621975955543	-0.240756048088914	0.672519388278159	0.345038776556317	Mon Dec 6 02:44:43 2021
0.335509676472225	s27	304	ridge_tessels0162_alpha_6	glm7	sc1	sc2	sess	True	True	tessels0162	cerebellum_suit	crossed	all	True	0.1	0.319717156803145	0.078526472644727	0.361738248230639	-0.276523503538723	0.790415221401383	0.580830442802765	Mon Dec 6 02:44:43 2021
0.337164040312253	s28	304	ridge_tessels0162_alpha_6	glm7	sc1	sc2	sess	True	True	tessels0162	cerebellum_suit	crossed	all	True	0.1	0.207176495908198	0.014592402898525	0.187533468804654	-0.624933062390691	0.639710832120381	0.279421664240762	Mon Dec 6 02:44:43 2021
0.445212990997194	s29	304	ridge_tessels0162_alpha_6	glm7	sc1	sc2	sess	True	True	tessels0162	cerebellum_suit	crossed	all	True	0.1	0.241038968955732	0.017727274073381	0.208071450849161	-0.583857098301678	0.642954749111317	0.285909498222633	Mon Dec 6 02:44:43 2021
0.420195776900239	s30	304	ridge_tessels0162_alpha_6	glm7	sc1	sc2	sess	True	True	tessels0162	cerebellum_suit	crossed	all	True	0.1	0.130059761166273	-0.080737044143719	0.070360485085245	-0.859279029829511	0.501245727649926	0.002491455299852	Mon Dec 6 02:44:43 2021
0.36397441962786	s31	304	ridge_tessels0162_alpha_6	glm7	sc1	sc2	sess	True	True	tessels0162	cerebellum_suit	crossed	all	True	0.1	0.167494884015865	-0.051582750385224	0.113204759286153	-0.773590481427694	0.514125899853103	0.028251799706206	Mon Dec 6 02:44:43 2021
0.299039310471068	s02	304	lasso_tessels0162_alpha_-3	glm7	sc1	sc2	sess	True	True	tessels0162	cerebellum_suit	crossed	all	True	0.1	0.277366682763879	0.03585080912461	0.250541465626943	-0.498917068746113	0.638323379470101	0.276646758940202	Mon Dec 6 02:27:08 2021
0.31043803041033	s03	304	lasso_tessels0162_alpha_-3	glm7	sc1	sc2	sess	True	True	tessels0162	cerebellum_suit	crossed	all	True	0.1	0.306779554556789	0.024178797798591	0.269163903291232	-0.461672193417536	0.729279117618803	0.458558235237607	Mon Dec 6 02:27:08 2021
0.332568010514732	s04	304	lasso_tessels0162_alpha_-3	glm7	sc1	sc2	sess	True	True	tessels0162	cerebellum_suit	crossed	all	True	0.1	0.095353578543727	-0.082794619564191	0.129791907993994	-0.740416184012013	0.528635622248781	0.057271244497561	Mon Dec 6 02:27:08 2021
0.309117193220994	s06	304	lasso_tessels0162_alpha_-3	glm7	sc1	sc2	sess	True	True	tessels0162	cerebellum_suit	crossed	all	True	0.1	0.370444239904233	0.114051237887302	0.438928642287505	-0.12214271542499	0.80265365020545	0.605307300410899	Mon Dec 6 02:27:08 2021
0.344201815013533	s08	304	lasso_tessels0162_alpha_-3	glm7	sc1	sc2	sess	True	True	tessels0162	cerebellum_suit	crossed	all	True	0.1	0.240082089979323	-0.03701937685742	0.216358495364167	-0.567283009271665	0.577067212419914	0.154134424839828	Mon Dec 6 02:27:09 2021
0.345705728230198	s09	304	lasso_tessels0162_alpha_-3	glm7	sc1	sc2	sess	True	True	tessels0162	cerebellum_suit	crossed	all	True	0.1	0.342571776486525	0.104762639942311	0.372356589815305	-0.255286820369391	0.661388383459615	0.322776766919229	Mon Dec 6 02:27:09 2021
0.303190151656325	s10	304	lasso_tessels0162_alpha_-3	glm7	sc1	sc2	sess	True	True	tessels0162	cerebellum_suit	crossed	all	True	0.1	0.371046869038163	0.119159305350425	0.299251181934321	-0.401497636131359	0.81574873618267	0.63149747236534	Mon Dec 6 02:27:09 2021
0.366276359073068	s12	304	lasso_tessels0162_alpha_-3	glm7	sc1	sc2	sess	True	True	tessels0162	cerebellum_suit	crossed	all	True	0.1	0.273422771479098	-0.009394998241318	0.24555591625875	-0.5088881674825	0.697866198718449	0.395732397436898	Mon Dec 6 02:27:09 2021
0.317206573769481	s14	304	lasso_tessels0162_alpha_-3	glm7	sc1	sc2	sess	True	True	tessels0162	cerebellum_suit	crossed	all	True	0.1	0.140755149621748	-0.031699317615972	0.333939338007503	-0.332121323984993	0.780372246581255	0.560744493162511	Mon Dec 6 02:27:10 2021
0.350259899127229	s15	304	lasso_tessels0162_alpha_-3	glm7	sc1	sc2	sess	True	True	tessels0162	cerebellum_suit	crossed	all	True	0.1	0.212143689381817	-0.029387276941264	0.281911854547391	-0.436176290905218	0.76033320701891	0.520666414037819	Mon Dec 6 02:27:10 2021
0.376067316461464	s17	304	lasso_tessels0162_alpha_-3	glm7	sc1	sc2	sess	True	True	tessels0162	cerebellum_suit	crossed	all	True	0.1	0.398863399408766	0.138241658103344	0.403711442324702	-0.192577115350598	0.762335278136286	0.524670556272571	Mon Dec 6 02:27:10 2021
0.290567516146924	s18	304	lasso_tessels0162_alpha_-3	glm7	sc1	sc2	sess	True	True	tessels0162	cerebellum_suit	crossed	all	True	0.1	0.173906929762195	-0.033362130509556	0.215557982278809	-0.568884035442381	0.645329744197035	0.29065948839407	Mon Dec 6 02:27:10 2021
0.27886750846237	s19	304	lasso_tessels0162_alpha_-3	glm7	sc1	sc2	sess	True	True	tessels0162	cerebellum_suit	crossed	all	True	0.1	0.246197089582124	0.040716059058062	0.254240109492353	-0.491519781015295	0.703909280886192	0.407818561772385	Mon Dec 6 02:27:11 2021
0.340294065365585	s20	304	lasso_tessels0162_alpha_-3	glm7	sc1	sc2	sess	True	True	tessels0162	cerebellum_suit	crossed	all	True	0.1	0.311460153132074	0.069816473654823	0.325037423570484	-0.349925152859032	0.561210248703642	0.122420497407284	Mon Dec 6 02:27:11 2021
0.341804219160662	s21	304	lasso_tessels0162_alpha_-3	glm7	sc1	sc2	sess	True	True	tessels0162	cerebellum_suit	crossed	all	True	0.1	0.121898456967645	-0.116545073597191	0.195871779559683	-0.608256440880633	0.410744543543258	-0.178510912913485	Mon Dec 6 02:27:11 2021
0.336594404152392	s22	304	lasso_tessels0162_alpha_-3	glm7	sc1	sc2	sess	True	True	tessels0162	cerebellum_suit	crossed	all	True	0.1	0.444622382080179	0.170852299138709	0.445329703945649	-0.109340592108703	0.772527866342073	0.545055732684145	Mon Dec 6 02:27:11 2021
0.366961058305128	s24	304	lasso_tessels0162_alpha_-3	glm7	sc1	sc2	sess	True	True	tessels0162	cerebellum_suit	crossed	all	True	0.1	0.186548476249705	-0.031561639995345	0.206192914360851	-0.587614171278299	0.640784001145546	0.281568002291092	Mon Dec 6 02:27:11 2021
0.324397941543431	s25	304	lasso_tessels0162_alpha_-3	glm7	sc1	sc2	sess	True	True	tessels0162	cerebellum_suit	crossed	all	True	0.1	0.25529320483165	-0.010026687772452	0.280142802216838	-0.439714395566324	0.605058905817236	0.210117811634471	Mon Dec 6 02:27:11 2021
0.314103782433989	s26	304	lasso_tessels0162_alpha_-3	glm7	sc1	sc2	sess	True	True	tessels0162	cerebellum_suit	crossed	all	True	0.1	0.289071982618295	0.041493682103244	0.379621975955543	-0.240756048088914	0.6289591497196	0.2579182994392	Mon Dec 6 02:27:12 2021
0.337892497207647	s27	304	lasso_tessels0162_alpha_-3	glm7	sc1	sc2	sess	True	True	tessels0162	cerebellum_suit	crossed	all	True	0.1	0.29918610779584	0.052490162080443	0.361738248230639	-0.276523503538723	0.703071493033562	0.406142986067123	Mon Dec 6 02:27:12 2021
0.337626679726851	s28	304	lasso_tessels0162_alpha_-3	glm7	sc1	sc2	sess	True	True	tessels0162	cerebellum_suit	crossed	all	True	0.1	0.183911683391627	-0.001187834654236	0.187533468804654	-0.624933062390691	0.526496441974558	0.052992883949115	Mon Dec 6 02:27:12 2021
0.464475046507704	s29	304	lasso_tessels0162_alpha_-3	glm7	sc1	sc2	sess	True	True	tessels0162	cerebellum_suit	crossed	all	True	0.1	0.201157287257459	-0.113130211940891	0.208071450849161	-0.583857098301678	0.591006608319736	0.182013216639472	Mon Dec 6 02:27:12 2021
0.427352011307201	s30	304	lasso_tessels0162_alpha_-3	glm7	sc1	sc2	sess	True	True	tessels0162	cerebellum_suit	crossed	all	True	0.1	0.111816142789669	-0.148807301425979	0.070360485085245	-0.859279029829511	0.408809115723793	-0.182381768552415	Mon Dec 6 02:27:12 2021
0.363837191926807	s31	304	lasso_tessels0162_alpha_-3	glm7	sc1	sc2	sess	True	True	tessels0162	cerebellum_suit	crossed	all	True	0.1	0.149761877551285	-0.08140935684762	0.113204759286153	-0.773590481427694	0.465595789561392	-0.068808420877217	Mon Dec 6 02:27:13 2021
0.303418126838783	s02	80	ridge_tessels0042_alpha_4	glm7	sc1	sc2	sess	True	True	tessels0042	cerebellum_suit	crossed	all	True	0.1	0.282494553492577	0.017777775495594	0.250541465626943	-0.498917068746113	0.646099402010691	0.292198804021382	Mon Dec 6 02:44:41 2021
0.315510823279716	s03	80	ridge_tessels0042_alpha_4	glm7	sc1	sc2	sess	True	True	tessels0042	cerebellum_suit	crossed	all	True	0.1	0.303864643217785	0.016134794821128	0.269163903291232	-0.461672193417536	0.744563805941165	0.489127611882331	Mon Dec 6 02:44:41 2021
0.335511119434117	s04	80	ridge_tessels0042_alpha_4	glm7	sc1	sc2	sess	True	True	tessels0042	cerebellum_suit	crossed	all	True	0.1	0.107867478339368	-0.078730202969665	0.129791907993994	-0.740416184012013	0.57840056309237	0.156801126184741	Mon Dec 6 02:44:41 2021
0.316969125178773	s06	80	ridge_tessels0042_alpha_4	glm7	sc1	sc2	sess	True	True	tessels0042	cerebellum_suit	crossed	all	True	0.1	0.365498096168135	0.088705606041781	0.438928642287505	-0.12214271542499	0.814674390022855	0.629348780045711	Mon Dec 6 02:44:41 2021
0.346880869293758	s08	80	ridge_tessels0042_alpha_4	glm7	sc1	sc2	sess	True	True	tessels0042	cerebellum_suit	crossed	all	True	0.1	0.240870993933738	-0.033768055765165	0.216358495364167	-0.567283009271665	0.667679976251457	0.335359952502914	Mon Dec 6 02:44:41 2021
0.346403746055274	s09	80	ridge_tessels0042_alpha_4	glm7	sc1	sc2	sess	True	True	tessels0042	cerebellum_suit	crossed	all	True	0.1	0.359677907740815	0.109448226951224	0.372356589815305	-0.255286820369391	0.785378849138918	0.570757698277837	Mon Dec 6 02:44:41 2021
0.306840046115582	s10	80	ridge_tessels0042_alpha_4	glm7	sc1	sc2	sess	True	True	tessels0042	cerebellum_suit	crossed	all	True	0.1	0.373791909855139	0.108704930735232	0.299251181934321	-0.401497636131359	0.833816445013977	0.667632890027954	Mon Dec 6 02:44:41 2021
0.367951810455003	s12	80	ridge_tessels0042_alpha_4	glm7	sc1	sc2	sess	True	True	tessels0042	cerebellum_suit	crossed	all	True	0.1	0.301591685656084	0.001481096131552	0.24555591625875	-0.5088881674825	0.782272816433828	0.564545632867655	Mon Dec 6 02:44:41 2021
0.328030696210725	s14	80	ridge_tessels0042_alpha_4	glm7	sc1	sc2	sess	True	True	tessels0042	cerebellum_suit	crossed	all	True	0.1	0.150078894497488	-0.076833962167911	0.333939338007503	-0.332121323984993	0.840084784447396	0.680169568894792	Mon Dec 6 02:44:41 2021
0.359997304549535	s15	80	ridge_tessels0042_alpha_4	glm7	sc1	sc2	sess	True	True	tessels0042	cerebellum_suit	crossed	all	True	0.1	0.201909701747818	-0.062053800491245	0.281911854547391	-0.436176290905218	0.791322556878155	0.58264511375631	Mon Dec 6 02:44:41 2021
0.383177626958956	s17	80	ridge_tessels0042_alpha_4	glm7	sc1	sc2	sess	True	True	tessels0042	cerebellum_suit	crossed	all	True	0.1	0.392545760316678	0.124990608141245	0.403711442324702	-0.192577115350598	0.787164387662921	0.574328775325842	Mon Dec 6 02:44:41 2021
0.301293671264955	s18	80	ridge_tessels0042_alpha_4	glm7	sc1	sc2	sess	True	True	tessels0042	cerebellum_suit	crossed	all	True	0.1	0.176049650497253	-0.095861656219857	0.215557982278809	-0.568884035442381	0.691007257758272	0.382014515516544	Mon Dec 6 02:44:41 2021
0.287319248683577	s19	80	ridge_tessels0042_alpha_4	glm7	sc1	sc2	sess	True	True	tessels0042	cerebellum_suit	crossed	all	True	0.1	0.236684276440332	-0.007706593615438	0.254240109492353	-0.491519781015295	0.694949676614278	0.389899353228556	Mon Dec 6 02:44:41 2021
0.343347468741128	s20	80	ridge_tessels0042_alpha_4	glm7	sc1	sc2	sess	True	True	tessels0042	cerebellum_suit	crossed	all	True	0.1	0.315974476555738	0.068602815961052	0.325037423570484	-0.349925152859032	0.585883908969404	0.171767817938809	Mon Dec 6 02:44:41 2021
0.345978235069142	s21	80	ridge_tessels0042_alpha_4	glm7	sc1	sc2	sess	True	True	tessels0042	cerebellum_suit	crossed	all	True	0.1	0.105335733461992	-0.126979553485084	0.195871779559683	-0.608256440880633	0.427445676143451	-0.145108647713098	Mon Dec 6 02:44:41 2021
0.35037294122518	s22	80	ridge_tessels0042_alpha_4	glm7	sc1	sc2	sess	True	True	tessels0042	cerebellum_suit	crossed	all	True	0.1	0.404676276963225	0.112932354714379	0.445329703945649	-0.109340592108703	0.767944379417716	0.535888758835432	Mon Dec 6 02:44:41 2021
0.372095169108578	s24	80	ridge_tessels0042_alpha_4	glm7	sc1	sc2	sess	True	True	tessels0042	cerebellum_suit	crossed	all	True	0.1	0.192089247726061	-0.044094048159515	0.206192914360851	-0.587614171278299	0.653749053708717	0.307498107417434	Mon Dec 6 02:44:41 2021
0.330295535033429	s25	80	ridge_tessels0042_alpha_4	glm7	sc1	sc2	sess	True	True	tessels0042	cerebellum_suit	crossed	all	True	0.1	0.26345833200661	-0.024059113213498	0.280142802216838	-0.439714395566324	0.661092209323246	0.322184418646491	Mon Dec 6 02:44:41 2021
0.321713183361879	s26	80	ridge_tessels0042_alpha_4	glm7	sc1	sc2	sess	True	True	tessels0042	cerebellum_suit	crossed	all	True	0.1	0.284745278993779	0.014639689550739	0.379621975955543	-0.240756048088914	0.645799103778703	0.291598207557406	Mon Dec 6 02:44:41 2021
0.343733192224802	s27	80	ridge_tessels0042_alpha_4	glm7	sc1	sc2	sess	True	True	tessels0042	cerebellum_suit	crossed	all	True	0.1	0.288287294099825	0.031552651632036	0.361738248230639	-0.276523503538723	0.778444125199945	0.55688825039989	Mon Dec 6 02:44:41 2021
0.341908032658942	s28	80	ridge_tessels0042_alpha_4	glm7	sc1	sc2	sess	True	True	tessels0042	cerebellum_suit	crossed	all	True	0.1	0.198234559375852	-0.009081401121664	0.187533468804654	-0.624933062390691	0.631916086631676	0.263832173263352	Mon Dec 6 02:44:41 2021
0.458114884721602	s29	80	ridge_tessels0042_alpha_4	glm7	sc1	sc2	sess	True	True	tessels0042	cerebellum_suit	crossed	all	True	0.1	0.223939161732626	-0.042065646610692	0.208071450849161	-0.583857098301678	0.646064569870933	0.292129139741865	Mon Dec 6 02:44:42 2021
0.43783555905306	s30	80	ridge_tessels0042_alpha_4	glm7	sc1	sc2	sess	True	True	tessels0042	cerebellum_suit	crossed	all	True	0.1	0.121960745047547	-0.164259801130855	0.070360485085245	-0.859279029829511	0.453295741029161	-0.093408517941678	Mon Dec 6 02:44:42 2021
0.37410739573496	s31	80	ridge_tessels0042_alpha_4	glm7	sc1	sc2	sess	True	True	tessels0042	cerebellum_suit	crossed	all	True	0.1	0.149171488360557	-0.111903481792497	0.113204759286153	-0.773590481427694	0.488270579992105	-0.02345884001579	Mon Dec 6 02:44:42 2021
0.2972211799842	s02	80	lasso_tessels0042_alpha_-3	glm7	sc1	sc2	sess	True	True	tessels0042	cerebellum_suit	crossed	all	True	0.1	0.266962614142378	0.047138658443918	0.250541465626943	-0.498917068746113	0.63711804653379	0.27423609306758	Mon Dec 6 02:26:49 2021
0.308556699576707	s03	80	lasso_tessels0042_alpha_-3	glm7	sc1	sc2	sess	True	True	tessels0042	cerebellum_suit	crossed	all	True	0.1	0.298854615216744	0.043269315161442	0.269163903291232	-0.461672193417536	0.735836945090787	0.471673890181574	Mon Dec 6 02:26:49 2021
0.327962266069524	s04	80	lasso_tessels0042_alpha_-3	glm7	sc1	sc2	sess	True	True	tessels0042	cerebellum_suit	crossed	all	True	0.1	0.090944588867939	-0.044762533609013	0.129791907993994	-0.740416184012013	0.536541195745813	0.073082391491627	Mon Dec 6 02:26:49 2021
0.305522217987158	s06	80	lasso_tessels0042_alpha_-3	glm7	sc1	sc2	sess	True	True	tessels0042	cerebellum_suit	crossed	all	True	0.1	0.387530518967043	0.143775999062363	0.438928642287505	-0.12214271542499	0.819749052209641	0.639498104419281	Mon Dec 6 02:26:49 2021
0.332381323801696	s08	80	lasso_tessels0042_alpha_-3	glm7	sc1	sc2	sess	True	True	tessels0042	cerebellum_suit	crossed	all	True	0.1	0.244635584408361	0.039624551009504	0.216358495364167	-0.567283009271665	0.649383871562842	0.298767743125684	Mon Dec 6 02:26:49 2021
0.34259887046705	s09	80	lasso_tessels0042_alpha_-3	glm7	sc1	sc2	sess	True	True	tessels0042	cerebellum_suit	crossed	all	True	0.1	0.349215506841001	0.121430502391649	0.372356589815305	-0.255286820369391	0.758334372204669	0.516668744409339	Mon Dec 6 02:26:49 2021
0.301759566730511	s10	80	lasso_tessels0042_alpha_-3	glm7	sc1	sc2	sess	True	True	tessels0042	cerebellum_suit	crossed	all	True	0.1	0.372012525120996	0.132341256644795	0.299251181934321	-0.401497636131359	0.83054090945067	0.66108181890134	Mon Dec 6 02:26:50 2021
0.356533267412809	s12	80	lasso_tessels0042_alpha_-3	glm7	sc1	sc2	sess	True	True	tessels0042	cerebellum_suit	crossed	all	True	0.1	0.294024869839514	0.050469674548625	0.24555591625875	-0.5088881674825	0.810639757698614	0.621279515397228	Mon Dec 6 02:26:50 2021
0.314578197333619	s14	80	lasso_tessels0042_alpha_-3	glm7	sc1	sc2	sess	True	True	tessels0042	cerebellum_suit	crossed	all	True	0.1	0.139572993687808	-0.017182486325555	0.333939338007503	-0.332121323984993	0.822463284986011	0.644926569972022	Mon Dec 6 02:26:50 2021
0.343414796103657	s15	80	lasso_tessels0042_alpha_-3	glm7	sc1	sc2	sess	True	True	tessels0042	cerebellum_suit	crossed	all	True	0.1	0.223348136564024	0.019487798220255	0.281911854547391	-0.436176290905218	0.785338181886581	0.570676363773162	Mon Dec 6 02:26:50 2021
0.374766199513044	s17	80	lasso_tessels0042_alpha_-3	glm7	sc1	sc2	sess	True	True	tessels0042	cerebellum_suit	crossed	all	True	0.1	0.396699695645922	0.149907238827684	0.403711442324702	-0.192577115350598	0.746914257995809	0.493828515991617	Mon Dec 6 02:26:50 2021
0.285719668957415	s18	80	lasso_tessels0042_alpha_-3	glm7	sc1	sc2	sess	True	True	tessels0042	cerebellum_suit	crossed	all	True	0.1	0.180925545727336	0.0080972716182	0.215557982278809	-0.568884035442381	0.693955878072202	0.387911756144404	Mon Dec 6 02:26:50 2021
0.277995140276134	s19	80	lasso_tessels0042_alpha_-3	glm7	sc1	sc2	sess	True	True	tessels0042	cerebellum_suit	crossed	all	True	0.1	0.243418504734367	0.05499353034714	0.254240109492353	-0.491519781015295	0.644649574292678	0.289299148585357	Mon Dec 6 02:26:50 2021
0.338699602109251	s20	80	lasso_tessels0042_alpha_-3	glm7	sc1	sc2	sess	True	True	tessels0042	cerebellum_suit	crossed	all	True	0.1	0.307341552908894	0.087302939962958	0.325037423570484	-0.349925152859032	0.544499754857033	0.088999509714067	Mon Dec 6 02:26:50 2021
0.333902476503867	s21	80	lasso_tessels0042_alpha_-3	glm7	sc1	sc2	sess	True	True	tessels0042	cerebellum_suit	crossed	all	True	0.1	0.096316766968994	-0.065378692851139	0.195871779559683	-0.608256440880633	0.36894673420037	-0.26210653159926	Mon Dec 6 02:26:50 2021
0.337985221998903	s22	80	lasso_tessels0042_alpha_-3	glm7	sc1	sc2	sess	True	True	tessels0042	cerebellum_suit	crossed	all	True	0.1	0.421943396785476	0.15969985107069	0.445329703945649	-0.109340592108703	0.773223093133684	0.546446186267368	Mon Dec 6 02:26:50 2021
0.364471103666881	s24	80	lasso_tessels0042_alpha_-3	glm7	sc1	sc2	sess	True	True	tessels0042	cerebellum_suit	crossed	all	True	0.1	0.176772752692312	-0.011533745370241	0.206192914360851	-0.587614171278299	0.615937461279373	0.231874922558747	Mon Dec 6 02:26:50 2021
0.318705406071855	s25	80	lasso_tessels0042_alpha_-3	glm7	sc1	sc2	sess	True	True	tessels0042	cerebellum_suit	crossed	all	True	0.1	0.253402603992753	0.03223942176083	0.280142802216838	-0.439714395566324	0.654118278078535	0.308236556157071	Mon Dec 6 02:26:50 2021
0.311752370702733	s26	80	lasso_tessels0042_alpha_-3	glm7	sc1	sc2	sess	True	True	tessels0042	cerebellum_suit	crossed	all	True	0.1	0.284918798674669	0.066439840664198	0.379621975955543	-0.240756048088914	0.66835465518993	0.336709310379859	Mon Dec 6 02:26:51 2021
0.335621097283484	s27	80	lasso_tessels0042_alpha_-3	glm7	sc1	sc2	sess	True	True	tessels0042	cerebellum_suit	crossed	all	True	0.1	0.290904473501513	0.074594868305423	0.361738248230639	-0.276523503538723	0.706372308237874	0.412744616475748	Mon Dec 6 02:26:51 2021
0.333630010605952	s28	80	lasso_tessels0042_alpha_-3	glm7	sc1	sc2	sess	True	True	tessels0042	cerebellum_suit	crossed	all	True	0.1	0.189797244484516	0.027319095636381	0.187533468804654	-0.624933062390691	0.588964165730597	0.177928331461194	Mon Dec 6 02:26:51 2021
0.454809704191615	s29	80	lasso_tessels0042_alpha_-3	glm7	sc1	sc2	sess	True	True	tessels0042	cerebellum_suit	crossed	all	True	0.1	0.190599534025571	-0.055413007689795	0.208071450849161	-0.583857098301678	0.649467762639292	0.298935525278584	Mon Dec 6 02:26:51 2021
0.421431566017249	s30	80	lasso_tessels0042_alpha_-3	glm7	sc1	sc2	sess	True	True	tessels0042	cerebellum_suit	crossed	all	True	0.1	0.106947120354808	-0.114649433489402	0.070360485085245	-0.859279029829511	0.440140750822901	-0.119718498354198	Mon Dec 6 02:26:51 2021
0.355600398575014	s31	80	lasso_tessels0042_alpha_-3	glm7	sc1	sc2	sess	True	True	tessels0042	cerebellum_suit	crossed	all	True	0.1	0.152877699125022	-0.020708440055612	0.113204759286153	-0.773590481427694	0.486218932597141	-0.027562134805718	Mon Dec 6 02:26:51 2021
0.296154746424138	s02	200	ridge_shen_alpha_6	glm7	sc1	sc2	sess	True	True	shen	cerebellum_suit	crossed	all	True	0.1	0.28098307783863	0.063099013128071	0.250541465626943	-0.498917068746113	0.649115543335343	0.298231086670686	Mon Dec 6 02:44:41 2021
0.301982738271138	s03	200	ridge_shen_alpha_6	glm7	sc1	sc2	sess	True	True	shen	cerebellum_suit	crossed	all	True	0.1	0.333616307086225	0.097667250795549	0.269163903291232	-0.461672193417536	0.748742885975272	0.497485771950545	Mon Dec 6 02:44:41 2021
0.32660899450085	s04	200	ridge_shen_alpha_6	glm7	sc1	sc2	sess	True	True	shen	cerebellum_suit	crossed	all	True	0.1	0.115689649169429	-0.026013089774912	0.129791907993994	-0.740416184012013	0.591404718047926	0.182809436095852	Mon Dec 6 02:44:41 2021
0.304207159075727	s06	200	ridge_shen_alpha_6	glm7	sc1	sc2	sess	True	True	shen	cerebellum_suit	crossed	all	True	0.1	0.401819616621059	0.159261288013482	0.438928642287505	-0.12214271542499	0.825613248748778	0.651226497497556	Mon Dec 6 02:44:41 2021
0.332967092853558	s08	200	ridge_shen_alpha_6	glm7	sc1	sc2	sess	True	True	shen	cerebellum_suit	crossed	all	True	0.1	0.260900921585415	0.044843677405286	0.216358495364167	-0.567283009271665	0.62996923193396	0.25993846386792	Mon Dec 6 02:44:41 2021
0.341401266933584	s09	200	ridge_shen_alpha_6	glm7	sc1	sc2	sess	True	True	shen	cerebellum_suit	crossed	all	True	0.1	0.357904987240359	0.127148417744906	0.372356589815305	-0.255286820369391	0.745476670415099	0.490953340830199	Mon Dec 6 02:44:41 2021
0.301116601870638	s10	200	ridge_shen_alpha_6	glm7	sc1	sc2	sess	True	True	shen	cerebellum_suit	crossed	all	True	0.1	0.376989144588463	0.138702399919603	0.299251181934321	-0.401497636131359	0.831935119355694	0.663870238711387	Mon Dec 6 02:44:41 2021
0.355205297230695	s12	200	ridge_shen_alpha_6	glm7	sc1	sc2	sess	True	True	shen	cerebellum_suit	crossed	all	True	0.1	0.314968581139264	0.069961279908224	0.24555591625875	-0.5088881674825	0.820638320310423	0.641276640620846	Mon Dec 6 02:44:41 2021
0.311325964174558	s14	200	ridge_shen_alpha_6	glm7	sc1	sc2	sess	True	True	shen	cerebellum_suit	crossed	all	True	0.1	0.172474544266556	0.014994380048236	0.333939338007503	-0.332121323984993	0.836603608862205	0.67320721772441	Mon Dec 6 02:44:41 2021
0.347141832773156	s15	200	ridge_shen_alpha_6	glm7	sc1	sc2	sess	True	True	shen	cerebellum_suit	crossed	all	True	0.1	0.216108751108665	0.008563279425448	0.281911854547391	-0.436176290905218	0.825327451806112	0.650654903612224	Mon Dec 6 02:44:41 2021
0.371099622092213	s17	200	ridge_shen_alpha_6	glm7	sc1	sc2	sess	True	True	shen	cerebellum_suit	crossed	all	True	0.1	0.421336684370358	0.175001220612813	0.403711442324702	-0.192577115350598	0.804123257148274	0.608246514296549	Mon Dec 6 02:44:41 2021
0.287652587007152	s18	200	ridge_shen_alpha_6	glm7	sc1	sc2	sess	True	True	shen	cerebellum_suit	crossed	all	True	0.1	0.198297771365607	0.002481042609643	0.215557982278809	-0.568884035442381	0.695428219245197	0.390856438490393	Mon Dec 6 02:44:41 2021
0.279361828984961	s19	200	ridge_shen_alpha_6	glm7	sc1	sc2	sess	True	True	shen	cerebellum_suit	crossed	all	True	0.1	0.251460464280431	0.047946183484843	0.254240109492353	-0.491519781015295	0.699820444059404	0.399640888118808	Mon Dec 6 02:44:41 2021
0.339739857665025	s20	200	ridge_shen_alpha_6	glm7	sc1	sc2	sess	True	True	shen	cerebellum_suit	crossed	all	True	0.1	0.310120121861236	0.081562100992274	0.325037423570484	-0.349925152859032	0.536795223544271	0.073590447088541	Mon Dec 6 02:44:41 2021
0.331253423041197	s21	200	ridge_shen_alpha_6	glm7	sc1	sc2	sess	True	True	shen	cerebellum_suit	crossed	all	True	0.1	0.138431895182472	-0.035331267353463	0.195871779559683	-0.608256440880633	0.444329639381582	-0.111340721236836	Mon Dec 6 02:44:41 2021
0.332303873455593	s22	200	ridge_shen_alpha_6	glm7	sc1	sc2	sess	True	True	shen	cerebellum_suit	crossed	all	True	0.1	0.450117714000193	0.197796900404482	0.445329703945649	-0.109340592108703	0.790374812293966	0.580749624587932	Mon Dec 6 02:44:41 2021
0.363140493709659	s24	200	ridge_shen_alpha_6	glm7	sc1	sc2	sess	True	True	shen	cerebellum_suit	crossed	all	True	0.1	0.197893231952639	0.004073118413475	0.206192914360851	-0.587614171278299	0.603130040951745	0.20626008190349	Mon Dec 6 02:44:41 2021
0.320220370791607	s25	200	ridge_shen_alpha_6	glm7	sc1	sc2	sess	True	True	shen	cerebellum_suit	crossed	all	True	0.1	0.262027030088315	0.033024153483953	0.280142802216838	-0.439714395566324	0.65873779040671	0.31747558081342	Mon Dec 6 02:44:41 2021
0.30976092743669	s26	200	ridge_shen_alpha_6	glm7	sc1	sc2	sess	True	True	shen	cerebellum_suit	crossed	all	True	0.1	0.314801836704764	0.085984299551889	0.379621975955543	-0.240756048088914	0.689994565392349	0.379989130784698	Mon Dec 6 02:44:41 2021
0.332175219085909	s27	200	ridge_shen_alpha_6	glm7	sc1	sc2	sess	True	True	shen	cerebellum_suit	crossed	all	True	0.1	0.326106229667768	0.098712172359048	0.361738248230639	-0.276523503538723	0.746865748204404	0.493731496408809	Mon Dec 6 02:44:41 2021
0.335237510650945	s28	200	ridge_shen_alpha_6	glm7	sc1	sc2	sess	True	True	shen	cerebellum_suit	crossed	all	True	0.1	0.2032458040266	0.024692612311014	0.187533468804654	-0.624933062390691	0.60681807122542	0.21363614245084	Mon Dec 6 02:44:41 2021
0.44041829486531	s29	200	ridge_shen_alpha_6	glm7	sc1	sc2	sess	True	True	shen	cerebellum_suit	crossed	all	True	0.1	0.246589400258723	0.038842897778744	0.208071450849161	-0.583857098301678	0.612004221039544	0.224008442079089	Mon Dec 6 02:44:41 2021
0.415807311995292	s30	200	ridge_shen_alpha_6	glm7	sc1	sc2	sess	True	True	shen	cerebellum_suit	crossed	all	True	0.1	0.127391673971207	-0.060451556305071	0.070360485085245	-0.859279029829511	0.467290472549999	-0.065419054900002	Mon Dec 6 02:44:41 2021
0.360039389163397	s31	200	ridge_shen_alpha_6	glm7	sc1	sc2	sess	True	True	shen	cerebellum_suit	crossed	all	True	0.1	0.16059873680247	-0.029036465201532	0.113204759286153	-0.773590481427694	0.499891014013013	-0.000217971973974	Mon Dec 6 02:44:41 2021
0.297302766356261	s02	25	ridge_mdtb_wb_025_alpha_4	glm7	sc1	sc2	sess	True	True	mdtb_wb_025	cerebellum_suit	crossed	all	True	0.1	0.27508605929561	0.055367321892492	0.250541465626943	-0.498917068746113	0.670632808016715	0.341265616033431	Mon Dec 6 02:44:40 2021
0.302724243116782	s03	25	ridge_mdtb_wb_025_alpha_4	glm7	sc1	sc2	sess	True	True	mdtb_wb_025	cerebellum_suit	crossed	all	True	0.1	0.324964435258171	0.091486255423796	0.269163903291232	-0.461672193417536	0.777730844867023	0.555461689734045	Mon Dec 6 02:44:40 2021
0.326519925594933	s04	25	ridge_mdtb_wb_025_alpha_4	glm7	sc1	sc2	sess	True	True	mdtb_wb_025	cerebellum_suit	crossed	all	True	0.1	0.118382485291762	-0.026426763250837	0.129791907993994	-0.740416184012013	0.65185191217845	0.3037038243569	Mon Dec 6 02:44:40 2021
0.306099103738672	s06	25	ridge_mdtb_wb_025_alpha_4	glm7	sc1	sc2	sess	True	True	mdtb_wb_025	cerebellum_suit	crossed	all	True	0.1	0.389301046159304	0.145795601782415	0.438928642287505	-0.12214271542499	0.838183667895716	0.676367335791432	Mon Dec 6 02:44:40 2021
0.330226868913058	s08	25	ridge_mdtb_wb_025_alpha_4	glm7	sc1	sc2	sess	True	True	mdtb_wb_025	cerebellum_suit	crossed	all	True	0.1	0.266027342911943	0.057774392904367	0.216358495364167	-0.567283009271665	0.652912997573717	0.305825995147434	Mon Dec 6 02:44:40 2021
0.3409876595494	s09	25	ridge_mdtb_wb_025_alpha_4	glm7	sc1	sc2	sess	True	True	mdtb_wb_025	cerebellum_suit	crossed	all	True	0.1	0.35765289037265	0.127343589544025	0.372356589815305	-0.255286820369391	0.750619101045821	0.501238202091641	Mon Dec 6 02:44:40 2021
0.300198164252131	s10	25	ridge_mdtb_wb_025_alpha_4	glm7	sc1	sc2	sess	True	True	mdtb_wb_025	cerebellum_suit	crossed	all	True	0.1	0.379703841684258	0.141780973507304	0.299251181934321	-0.401497636131359	0.834053209974383	0.668106419948767	Mon Dec 6 02:44:40 2021
0.354687527474417	s12	25	ridge_mdtb_wb_025_alpha_4	glm7	sc1	sc2	sess	True	True	mdtb_wb_025	cerebellum_suit	crossed	all	True	0.1	0.313499895140638	0.072316244342895	0.24555591625875	-0.5088881674825	0.822531033935786	0.645062067871572	Mon Dec 6 02:44:40 2021
0.313859373683499	s14	25	ridge_mdtb_wb_025_alpha_4	glm7	sc1	sc2	sess	True	True	mdtb_wb_025	cerebellum_suit	crossed	all	True	0.1	0.158361696239063	0.00085747943247	0.333939338007503	-0.332121323984993	0.826351312001636	0.652702624003273	Mon Dec 6 02:44:40 2021
0.344464172757218	s15	25	ridge_mdtb_wb_025_alpha_4	glm7	sc1	sc2	sess	True	True	mdtb_wb_025	cerebellum_suit	crossed	all	True	0.1	0.239733486715311	0.025595754601691	0.281911854547391	-0.436176290905218	0.839842904298487	0.679685808596974	Mon Dec 6 02:44:40 2021
0.370584350607998	s17	25	ridge_mdtb_wb_025_alpha_4	glm7	sc1	sc2	sess	True	True	mdtb_wb_025	cerebellum_suit	crossed	all	True	0.1	0.422855163852373	0.176468544637898	0.403711442324702	-0.192577115350598	0.808005763731663	0.616011527463325	Mon Dec 6 02:44:40 2021
0.289907395127652	s18	25	ridge_mdtb_wb_025_alpha_4	glm7	sc1	sc2	sess	True	True	mdtb_wb_025	cerebellum_suit	crossed	all	True	0.1	0.18244946537118	-0.012889805820506	0.215557982278809	-0.568884035442381	0.722183489990139	0.444366979980279	Mon Dec 6 02:44:40 2021
0.277851286211799	s19	25	ridge_mdtb_wb_025_alpha_4	glm7	sc1	sc2	sess	True	True	mdtb_wb_025	cerebellum_suit	crossed	all	True	0.1	0.264963564356626	0.059053008548508	0.254240109492353	-0.491519781015295	0.693624066242391	0.387248132484781	Mon Dec 6 02:44:40 2021
0.340471893652068	s20	25	ridge_mdtb_wb_025_alpha_4	glm7	sc1	sc2	sess	True	True	mdtb_wb_025	cerebellum_suit	crossed	all	True	0.1	0.299975149221262	0.076315181839235	0.325037423570484	-0.349925152859032	0.534301852804501	0.068603705609002	Mon Dec 6 02:44:40 2021
0.336287705962518	s21	25	ridge_mdtb_wb_025_alpha_4	glm7	sc1	sc2	sess	True	True	mdtb_wb_025	cerebellum_suit	crossed	all	True	0.1	0.105722394874117	-0.06999989245606	0.195871779559683	-0.608256440880633	0.467246337190244	-0.065507325619512	Mon Dec 6 02:44:40 2021
0.334017281491503	s22	25	ridge_mdtb_wb_025_alpha_4	glm7	sc1	sc2	sess	True	True	mdtb_wb_025	cerebellum_suit	crossed	all	True	0.1	0.439121632948049	0.186561961478841	0.445329703945649	-0.109340592108703	0.806266066669122	0.612532133338244	Mon Dec 6 02:44:40 2021
0.363969265688424	s24	25	ridge_mdtb_wb_025_alpha_4	glm7	sc1	sc2	sess	True	True	mdtb_wb_025	cerebellum_suit	crossed	all	True	0.1	0.185475498536755	-0.001542175999428	0.206192914360851	-0.587614171278299	0.592932354020618	0.185864708041236	Mon Dec 6 02:44:40 2021
0.3224576761661	s25	25	ridge_mdtb_wb_025_alpha_4	glm7	sc1	sc2	sess	True	True	mdtb_wb_025	cerebellum_suit	crossed	all	True	0.1	0.252107098924197	0.018470109701908	0.280142802216838	-0.439714395566324	0.676993530671943	0.353987061343886	Mon Dec 6 02:44:40 2021
0.310268491401141	s26	25	ridge_mdtb_wb_025_alpha_4	glm7	sc1	sc2	sess	True	True	mdtb_wb_025	cerebellum_suit	crossed	all	True	0.1	0.311687202617458	0.082806548463666	0.379621975955543	-0.240756048088914	0.676739944253031	0.353479888506063	Mon Dec 6 02:44:40 2021
0.333932877434441	s27	25	ridge_mdtb_wb_025_alpha_4	glm7	sc1	sc2	sess	True	True	mdtb_wb_025	cerebellum_suit	crossed	all	True	0.1	0.312022853123379	0.087158294910339	0.361738248230639	-0.276523503538723	0.739242574564222	0.478485149128443	Mon Dec 6 02:44:40 2021
0.333921125158443	s28	25	ridge_mdtb_wb_025_alpha_4	glm7	sc1	sc2	sess	True	True	mdtb_wb_025	cerebellum_suit	crossed	all	True	0.1	0.204798119425495	0.030915559261841	0.187533468804654	-0.624933062390691	0.633763422851175	0.267526845702349	Mon Dec 6 02:44:40 2021
0.443068477674887	s29	25	ridge_mdtb_wb_025_alpha_4	glm7	sc1	sc2	sess	True	True	mdtb_wb_025	cerebellum_suit	crossed	all	True	0.1	0.221042083775401	0.025811716683491	0.208071450849161	-0.583857098301678	0.62148523652414	0.242970473048281	Mon Dec 6 02:44:40 2021
0.419790119486059	s30	25	ridge_mdtb_wb_025_alpha_4	glm7	sc1	sc2	sess	True	True	mdtb_wb_025	cerebellum_suit	crossed	all	True	0.1	0.126339798436484	-0.080481531207555	0.070360485085245	-0.859279029829511	0.555041696413256	0.110083392826511	Mon Dec 6 02:44:40 2021
0.36020019868417	s31	25	ridge_mdtb_wb_025_alpha_4	glm7	sc1	sc2	sess	True	True	mdtb_wb_025	cerebellum_suit	crossed	all	True	0.1	0.165096608710325	-0.029084757642566	0.113204759286153	-0.773590481427694	0.51665847143015	0.033316942860299	Mon Dec 6 02:44:40 2021
0.302965144872518	s02	7	ridge_mdtb_wb_007_alpha_2	glm7	sc1	sc2	sess	True	True	mdtb_wb_007	cerebellum_suit	crossed	all	True	0.1	0.253364406345764	0.013172640692735	0.250541465626943	-0.498917068746113	0.701692467084669	0.403384934169337	Mon Dec 6 02:44:39 2021
0.312790006395952	s03	7	ridge_mdtb_wb_007_alpha_2	glm7	sc1	sc2	sess	True	True	mdtb_wb_007	cerebellum_suit	crossed	all	True	0.1	0.279502443790277	0.028800765291572	0.269163903291232	-0.461672193417536	0.778968283143545	0.55793656628709	Mon Dec 6 02:44:39 2021
0.334578125462629	s04	7	ridge_mdtb_wb_007_alpha_2	glm7	sc1	sc2	sess	True	True	mdtb_wb_007	cerebellum_suit	crossed	all	True	0.1	0.106442912613723	-0.075180177065491	0.129791907993994	-0.740416184012013	0.740154082223232	0.480308164446464	Mon Dec 6 02:44:39 2021
0.311080221445218	s06	7	ridge_mdtb_wb_007_alpha_2	glm7	sc1	sc2	sess	True	True	mdtb_wb_007	cerebellum_suit	crossed	all	True	0.1	0.382543370265584	0.1210847676397	0.438928642287505	-0.12214271542499	0.859354472173676	0.718708944347351	Mon Dec 6 02:44:39 2021
0.335026655822583	s08	7	ridge_mdtb_wb_007_alpha_2	glm7	sc1	sc2	sess	True	True	mdtb_wb_007	cerebellum_suit	crossed	all	True	0.1	0.245675362587313	0.029872226600519	0.216358495364167	-0.567283009271665	0.713165010023634	0.426330020047268	Mon Dec 6 02:44:39 2021
0.345879164398524	s09	7	ridge_mdtb_wb_007_alpha_2	glm7	sc1	sc2	sess	True	True	mdtb_wb_007	cerebellum_suit	crossed	all	True	0.1	0.334718750907263	0.102228516509413	0.372356589815305	-0.255286820369391	0.801702411399402	0.603404822798804	Mon Dec 6 02:44:39 2021
0.305047883655812	s10	7	ridge_mdtb_wb_007_alpha_2	glm7	sc1	sc2	sess	True	True	mdtb_wb_007	cerebellum_suit	crossed	all	True	0.1	0.364984053687203	0.115571964111487	0.299251181934321	-0.401497636131359	0.870128055199517	0.740256110399033	Mon Dec 6 02:44:39 2021
0.361844676108177	s12	7	ridge_mdtb_wb_007_alpha_2	glm7	sc1	sc2	sess	True	True	mdtb_wb_007	cerebellum_suit	crossed	all	True	0.1	0.303891987512168	0.03324771442727	0.24555591625875	-0.5088881674825	0.861306931248444	0.722613862496887	Mon Dec 6 02:44:39 2021
0.31994395320919	s14	7	ridge_mdtb_wb_007_alpha_2	glm7	sc1	sc2	sess	True	True	mdtb_wb_007	cerebellum_suit	crossed	all	True	0.1	0.161884064530876	-0.03385330903164	0.333939338007503	-0.332121323984993	0.883757820148755	0.76751564029751	Mon Dec 6 02:44:39 2021
0.351240461386717	s15	7	ridge_mdtb_wb_007_alpha_2	glm7	sc1	sc2	sess	True	True	mdtb_wb_007	cerebellum_suit	crossed	all	True	0.1	0.231095180456453	-0.008794648169068	0.281911854547391	-0.436176290905218	0.868913777325031	0.737827554650061	Mon Dec 6 02:44:39 2021
0.382076467363187	s17	7	ridge_mdtb_wb_007_alpha_2	glm7	sc1	sc2	sess	True	True	mdtb_wb_007	cerebellum_suit	crossed	all	True	0.1	0.389507632382788	0.129389429545248	0.403711442324702	-0.192577115350598	0.846383187330908	0.692766374661816	Mon Dec 6 02:44:39 2021
0.296994972135174	s18	7	ridge_mdtb_wb_007_alpha_2	glm7	sc1	sc2	sess	True	True	mdtb_wb_007	cerebellum_suit	crossed	all	True	0.1	0.170027358224308	-0.066262209582378	0.215557982278809	-0.568884035442381	0.785371622906147	0.570743245812295	Mon Dec 6 02:44:39 2021
0.28537077752473	s19	7	ridge_mdtb_wb_007_alpha_2	glm7	sc1	sc2	sess	True	True	mdtb_wb_007	cerebellum_suit	crossed	all	True	0.1	0.230316254665779	0.002825819493693	0.254240109492353	-0.491519781015295	0.776651857675814	0.553303715351628	Mon Dec 6 02:44:39 2021
0.345346476817611	s20	7	ridge_mdtb_wb_007_alpha_2	glm7	sc1	sc2	sess	True	True	mdtb_wb_007	cerebellum_suit	crossed	all	True	0.1	0.281956707574815	0.049440378048386	0.325037423570484	-0.349925152859032	0.564091241743221	0.128182483486442	Mon Dec 6 02:44:39 2021
0.34547498904321	s21	7	ridge_mdtb_wb_007_alpha_2	glm7	sc1	sc2	sess	True	True	mdtb_wb_007	cerebellum_suit	crossed	all	True	0.1	0.071011556432311	-0.131360444396589	0.195871779559683	-0.608256440880633	0.521319301466207	0.042638602932413	Mon Dec 6 02:44:39 2021
0.336636119082751	s22	7	ridge_mdtb_wb_007_alpha_2	glm7	sc1	sc2	sess	True	True	mdtb_wb_007	cerebellum_suit	crossed	all	True	0.1	0.437529934617418	0.174073324633425	0.445329703945649	-0.109340592108703	0.795227474896009	0.590454949792018	Mon Dec 6 02:44:39 2021
0.367970562775957	s24	7	ridge_mdtb_wb_007_alpha_2	glm7	sc1	sc2	sess	True	True	mdtb_wb_007	cerebellum_suit	crossed	all	True	0.1	0.178599388503577	-0.021746388143952	0.206192914360851	-0.587614171278299	0.634502416149066	0.269004832298131	Mon Dec 6 02:44:39 2021
0.331664957038458	s25	7	ridge_mdtb_wb_007_alpha_2	glm7	sc1	sc2	sess	True	True	mdtb_wb_007	cerebellum_suit	crossed	all	True	0.1	0.224884005319192	-0.040512118057693	0.280142802216838	-0.439714395566324	0.71705918558452	0.434118371169041	Mon Dec 6 02:44:39 2021
0.32073278576833	s26	7	ridge_mdtb_wb_007_alpha_2	glm7	sc1	sc2	sess	True	True	mdtb_wb_007	cerebellum_suit	crossed	all	True	0.1	0.262002881579421	0.017153440300762	0.379621975955543	-0.240756048088914	0.690476816388442	0.380953632776884	Mon Dec 6 02:44:39 2021
0.342621278789497	s27	7	ridge_mdtb_wb_007_alpha_2	glm7	sc1	sc2	sess	True	True	mdtb_wb_007	cerebellum_suit	crossed	all	True	0.1	0.277812549104281	0.039913626439442	0.361738248230639	-0.276523503538723	0.768157213886343	0.536314427772686	Mon Dec 6 02:44:39 2021
0.338144627999899	s28	7	ridge_mdtb_wb_007_alpha_2	glm7	sc1	sc2	sess	True	True	mdtb_wb_007	cerebellum_suit	crossed	all	True	0.1	0.178035701696237	0.007391403308874	0.187533468804654	-0.624933062390691	0.743356074173775	0.48671214834755	Mon Dec 6 02:44:39 2021
0.457171989301252	s29	7	ridge_mdtb_wb_007_alpha_2	glm7	sc1	sc2	sess	True	True	mdtb_wb_007	cerebellum_suit	crossed	all	True	0.1	0.167999171304717	-0.037133034260889	0.208071450849161	-0.583857098301678	0.586595144656581	0.173190289313162	Mon Dec 6 02:44:39 2021
0.422034956259617	s30	7	ridge_mdtb_wb_007_alpha_2	glm7	sc1	sc2	sess	True	True	mdtb_wb_007	cerebellum_suit	crossed	all	True	0.1	0.121228200888606	-0.089716171895744	0.070360485085245	-0.859279029829511	0.706613582651379	0.413227165302757	Mon Dec 6 02:44:39 2021
0.36579437937629	s31	7	ridge_mdtb_wb_007_alpha_2	glm7	sc1	sc2	sess	True	True	mdtb_wb_007	cerebellum_suit	crossed	all	True	0.1	0.14530318864268	-0.061874377898011	0.113204759286153	-0.773590481427694	0.624795439186208	0.249590878372415	Mon Dec 6 02:44:39 2021
0.301457502404502	s02	7	ridge_mdtb4002_wb_indv_7_alpha_2	glm7	sc1	sc2	sess	True	True	mdtb4002_wb_indv_7	cerebellum_suit	crossed	all	True	0.1	0.261845222424753	0.024588774189756	0.250541465626943	-0.498917068746113	0.736903318762497	0.473806637524994	Mon Dec 6 02:44:38 2021
0.303505766094594	s03	7	ridge_mdtb4002_wb_indv_7_alpha_2	glm7	sc1	sc2	sess	True	True	mdtb4002_wb_indv_7	cerebellum_suit	crossed	all	True	0.1	0.334587467803392	0.087830346214727	0.269163903291232	-0.461672193417536	0.796137909109677	0.592275818219354	Mon Dec 6 02:44:38 2021
0.327771589915254	s04	7	ridge_mdtb4002_wb_indv_7_alpha_2	glm7	sc1	sc2	sess	True	True	mdtb4002_wb_indv_7	cerebellum_suit	crossed	all	True	0.1	0.12830540630547	-0.030923833681798	0.129791907993994	-0.740416184012013	0.718046821525133	0.436093643050267	Mon Dec 6 02:44:38 2021
0.303913986753167	s06	7	ridge_mdtb4002_wb_indv_7_alpha_2	glm7	sc1	sc2	sess	True	True	mdtb4002_wb_indv_7	cerebellum_suit	crossed	all	True	0.1	0.409249520602128	0.160112405951261	0.438928642287505	-0.12214271542499	0.860804497075233	0.721608994150466	Mon Dec 6 02:44:38 2021
0.33823568892616	s08	7	ridge_mdtb4002_wb_indv_7_alpha_2	glm7	sc1	sc2	sess	True	True	mdtb4002_wb_indv_7	cerebellum_suit	crossed	all	True	0.1	0.238640481800975	0.011101297200468	0.216358495364167	-0.567283009271665	0.678248624621998	0.356497249243996	Mon Dec 6 02:44:38 2021
0.349093831624882	s09	7	ridge_mdtb4002_wb_indv_7_alpha_2	glm7	sc1	sc2	sess	True	True	mdtb4002_wb_indv_7	cerebellum_suit	crossed	all	True	0.1	0.341296753644429	0.093815202839348	0.372356589815305	-0.255286820369391	0.875216753692501	0.750433507385001	Mon Dec 6 02:44:38 2021
0.305519177291791	s10	7	ridge_mdtb4002_wb_indv_7_alpha_2	glm7	sc1	sc2	sess	True	True	mdtb4002_wb_indv_7	cerebellum_suit	crossed	all	True	0.1	0.371113851769011	0.115137218722653	0.299251181934321	-0.401497636131359	0.889773572916048	0.779547145832095	Mon Dec 6 02:44:38 2021
0.359692608730393	s12	7	ridge_mdtb4002_wb_indv_7_alpha_2	glm7	sc1	sc2	sess	True	True	mdtb4002_wb_indv_7	cerebellum_suit	crossed	all	True	0.1	0.320119210525264	0.045519900464131	0.24555591625875	-0.5088881674825	0.871597521544601	0.743195043089203	Mon Dec 6 02:44:38 2021
0.331858894752711	s14	7	ridge_mdtb4002_wb_indv_7_alpha_2	glm7	sc1	sc2	sess	True	True	mdtb4002_wb_indv_7	cerebellum_suit	crossed	all	True	0.1	0.115657928055634	-0.106639321973402	0.333939338007503	-0.332121323984993	0.889761904886256	0.779523809772512	Mon Dec 6 02:44:38 2021
0.347204282205313	s15	7	ridge_mdtb4002_wb_indv_7_alpha_2	glm7	sc1	sc2	sess	True	True	mdtb4002_wb_indv_7	cerebellum_suit	crossed	all	True	0.1	0.249540211191772	0.013079784690292	0.281911854547391	-0.436176290905218	0.876738045252411	0.753476090504822	Mon Dec 6 02:44:38 2021
0.382930568998259	s17	7	ridge_mdtb4002_wb_indv_7_alpha_2	glm7	sc1	sc2	sess	True	True	mdtb4002_wb_indv_7	cerebellum_suit	crossed	all	True	0.1	0.383640031433394	0.123573494598597	0.403711442324702	-0.192577115350598	0.833679526122628	0.667359052245257	Mon Dec 6 02:44:38 2021
0.293415148392846	s18	7	ridge_mdtb4002_wb_indv_7_alpha_2	glm7	sc1	sc2	sess	True	True	mdtb4002_wb_indv_7	cerebellum_suit	crossed	all	True	0.1	0.190898260760386	-0.037814007064092	0.215557982278809	-0.568884035442381	0.812632882227115	0.62526576445423	Mon Dec 6 02:44:38 2021
0.27716264020727	s19	7	ridge_mdtb4002_wb_indv_7_alpha_2	glm7	sc1	sc2	sess	True	True	mdtb4002_wb_indv_7	cerebellum_suit	crossed	all	True	0.1	0.280569016135488	0.066086554905108	0.254240109492353	-0.491519781015295	0.758984752915069	0.517969505830139	Mon Dec 6 02:44:38 2021
0.346482499352032	s20	7	ridge_mdtb4002_wb_indv_7_alpha_2	glm7	sc1	sc2	sess	True	True	mdtb4002_wb_indv_7	cerebellum_suit	crossed	all	True	0.1	0.278136403184862	0.037762154213501	0.325037423570484	-0.349925152859032	0.620348684178032	0.240697368356064	Mon Dec 6 02:44:38 2021
0.350600439913959	s21	7	ridge_mdtb4002_wb_indv_7_alpha_2	glm7	sc1	sc2	sess	True	True	mdtb4002_wb_indv_7	cerebellum_suit	crossed	all	True	0.1	0.074555670251643	-0.172086264113784	0.195871779559683	-0.608256440880633	0.641325203832048	0.282650407664096	Mon Dec 6 02:44:38 2021
0.339725774323995	s22	7	ridge_mdtb4002_wb_indv_7_alpha_2	glm7	sc1	sc2	sess	True	True	mdtb4002_wb_indv_7	cerebellum_suit	crossed	all	True	0.1	0.429339522467231	0.161518548460295	0.445329703945649	-0.109340592108703	0.826883655519197	0.653767311038394	Mon Dec 6 02:44:38 2021
0.372097485577615	s24	7	ridge_mdtb4002_wb_indv_7_alpha_2	glm7	sc1	sc2	sess	True	True	mdtb4002_wb_indv_7	cerebellum_suit	crossed	all	True	0.1	0.179942650032668	-0.051521188851049	0.206192914360851	-0.587614171278299	0.683149709859408	0.366299419718816	Mon Dec 6 02:44:38 2021
0.324372991049891	s25	7	ridge_mdtb4002_wb_indv_7_alpha_2	glm7	sc1	sc2	sess	True	True	mdtb4002_wb_indv_7	cerebellum_suit	crossed	all	True	0.1	0.264224919536916	0.007637612545388	0.280142802216838	-0.439714395566324	0.755219147379542	0.510438294759084	Mon Dec 6 02:44:38 2021
0.320330995812496	s26	7	ridge_mdtb4002_wb_indv_7_alpha_2	glm7	sc1	sc2	sess	True	True	mdtb4002_wb_indv_7	cerebellum_suit	crossed	all	True	0.1	0.271896757436621	0.020783094172266	0.379621975955543	-0.240756048088914	0.690433170114691	0.380866340229383	Mon Dec 6 02:44:38 2021
0.338644920416225	s27	7	ridge_mdtb4002_wb_indv_7_alpha_2	glm7	sc1	sc2	sess	True	True	mdtb4002_wb_indv_7	cerebellum_suit	crossed	all	True	0.1	0.300923734050465	0.070034747787469	0.361738248230639	-0.276523503538723	0.745745777913039	0.491491555826078	Mon Dec 6 02:44:38 2021
0.348643558249705	s28	7	ridge_mdtb4002_wb_indv_7_alpha_2	glm7	sc1	sc2	sess	True	True	mdtb4002_wb_indv_7	cerebellum_suit	crossed	all	True	0.1	0.191773096903185	-0.054497788175835	0.187533468804654	-0.624933062390691	0.698158177895641	0.396316355791281	Mon Dec 6 02:44:38 2021
0.446602147928682	s29	7	ridge_mdtb4002_wb_indv_7_alpha_2	glm7	sc1	sc2	sess	True	True	mdtb4002_wb_indv_7	cerebellum_suit	crossed	all	True	0.1	0.244378931967561	0.016159457756975	0.208071450849161	-0.583857098301678	0.696241079751907	0.392482159503814	Mon Dec 6 02:44:38 2021
0.430189173681232	s30	7	ridge_mdtb4002_wb_indv_7_alpha_2	glm7	sc1	sc2	sess	True	True	mdtb4002_wb_indv_7	cerebellum_suit	crossed	all	True	0.1	0.099358477888798	-0.131222280192571	0.070360485085245	-0.859279029829511	0.491582347877337	-0.016835304245327	Mon Dec 6 02:44:38 2021
0.365590821536864	s31	7	ridge_mdtb4002_wb_indv_7_alpha_2	glm7	sc1	sc2	sess	True	True	mdtb4002_wb_indv_7	cerebellum_suit	crossed	all	True	0.1	0.172871842205026	-0.055605818716985	0.113204759286153	-0.773590481427694	0.623941291853134	0.247882583706268	Mon Dec 6 02:44:38 2021
0.295663687962729	s02	17	ridge_mdtb4002_wb_indv_17_alpha_4	glm7	sc1	sc2	sess	True	True	mdtb4002_wb_indv_17	cerebellum_suit	crossed	all	True	0.1	0.273266319594659	0.063607866851958	0.250541465626943	-0.498917068746113	0.668255247332251	0.336510494664502	Mon Dec 6 02:44:37 2021
0.300429958180915	s03	17	ridge_mdtb4002_wb_indv_17_alpha_4	glm7	sc1	sc2	sess	True	True	mdtb4002_wb_indv_17	cerebellum_suit	crossed	all	True	0.1	0.330569169146999	0.102108685562098	0.269163903291232	-0.461672193417536	0.798926073833665	0.59785214766733	Mon Dec 6 02:44:37 2021
0.325624247013223	s04	17	ridge_mdtb4002_wb_indv_17_alpha_4	glm7	sc1	sc2	sess	True	True	mdtb4002_wb_indv_17	cerebellum_suit	crossed	all	True	0.1	0.113351566118123	-0.020374675570735	0.129791907993994	-0.740416184012013	0.69561967898788	0.391239357975761	Mon Dec 6 02:44:37 2021
0.305707512252148	s06	17	ridge_mdtb4002_wb_indv_17_alpha_4	glm7	sc1	sc2	sess	True	True	mdtb4002_wb_indv_17	cerebellum_suit	crossed	all	True	0.1	0.384217824720152	0.145724281277229	0.438928642287505	-0.12214271542499	0.855226953397074	0.710453906794148	Mon Dec 6 02:44:37 2021
0.33219537594775	s08	17	ridge_mdtb4002_wb_indv_17_alpha_4	glm7	sc1	sc2	sess	True	True	mdtb4002_wb_indv_17	cerebellum_suit	crossed	all	True	0.1	0.239376233635619	0.044994090046458	0.216358495364167	-0.567283009271665	0.618026698757092	0.236053397514184	Mon Dec 6 02:44:37 2021
0.341003008676719	s09	17	ridge_mdtb4002_wb_indv_17_alpha_4	glm7	sc1	sc2	sess	True	True	mdtb4002_wb_indv_17	cerebellum_suit	crossed	all	True	0.1	0.36084303404035	0.129943691148195	0.372356589815305	-0.255286820369391	0.765218546689937	0.530437093379874	Mon Dec 6 02:44:37 2021
0.299545967910814	s10	17	ridge_mdtb4002_wb_indv_17_alpha_4	glm7	sc1	sc2	sess	True	True	mdtb4002_wb_indv_17	cerebellum_suit	crossed	all	True	0.1	0.385456309294135	0.146950187750866	0.299251181934321	-0.401497636131359	0.882243014815527	0.764486029631054	Mon Dec 6 02:44:37 2021
0.352251469225462	s12	17	ridge_mdtb4002_wb_indv_17_alpha_4	glm7	sc1	sc2	sess	True	True	mdtb4002_wb_indv_17	cerebellum_suit	crossed	all	True	0.1	0.319028961761247	0.084382671079624	0.24555591625875	-0.5088881674825	0.856976976016451	0.713953952032901	Mon Dec 6 02:44:37 2021
0.311767596365788	s14	17	ridge_mdtb4002_wb_indv_17_alpha_4	glm7	sc1	sc2	sess	True	True	mdtb4002_wb_indv_17	cerebellum_suit	crossed	all	True	0.1	0.163765225082476	0.011429494044898	0.333939338007503	-0.332121323984993	0.854420789604124	0.708841579208249	Mon Dec 6 02:44:37 2021
0.343656568887384	s15	17	ridge_mdtb4002_wb_indv_17_alpha_4	glm7	sc1	sc2	sess	True	True	mdtb4002_wb_indv_17	cerebellum_suit	crossed	all	True	0.1	0.231469240688598	0.027554131147858	0.281911854547391	-0.436176290905218	0.850427265263812	0.700854530527624	Mon Dec 6 02:44:37 2021
0.367732734897869	s17	17	ridge_mdtb4002_wb_indv_17_alpha_4	glm7	sc1	sc2	sess	True	True	mdtb4002_wb_indv_17	cerebellum_suit	crossed	all	True	0.1	0.431481959943056	0.186151517957325	0.403711442324702	-0.192577115350598	0.808027638056795	0.61605527611359	Mon Dec 6 02:44:37 2021
0.287141280576504	s18	17	ridge_mdtb4002_wb_indv_17_alpha_4	glm7	sc1	sc2	sess	True	True	mdtb4002_wb_indv_17	cerebellum_suit	crossed	all	True	0.1	0.198299654811223	0.00606828675574	0.215557982278809	-0.568884035442381	0.77088598868702	0.54177197737404	Mon Dec 6 02:44:37 2021
0.277883641791662	s19	17	ridge_mdtb4002_wb_indv_17_alpha_4	glm7	sc1	sc2	sess	True	True	mdtb4002_wb_indv_17	cerebellum_suit	crossed	all	True	0.1	0.26327752773988	0.058703638623521	0.254240109492353	-0.491519781015295	0.747426607712342	0.494853215424685	Mon Dec 6 02:44:37 2021
0.340144864814962	s20	17	ridge_mdtb4002_wb_indv_17_alpha_4	glm7	sc1	sc2	sess	True	True	mdtb4002_wb_indv_17	cerebellum_suit	crossed	all	True	0.1	0.292019225109893	0.074517720861557	0.325037423570484	-0.349925152859032	0.545639949513839	0.091279899027679	Mon Dec 6 02:44:37 2021
0.330208136739776	s21	17	ridge_mdtb4002_wb_indv_17_alpha_4	glm7	sc1	sc2	sess	True	True	mdtb4002_wb_indv_17	cerebellum_suit	crossed	all	True	0.1	0.12773332685614	-0.029518235691575	0.195871779559683	-0.608256440880633	0.578839704995193	0.157679409990385	Mon Dec 6 02:44:37 2021
0.333981229538722	s22	17	ridge_mdtb4002_wb_indv_17_alpha_4	glm7	sc1	sc2	sess	True	True	mdtb4002_wb_indv_17	cerebellum_suit	crossed	all	True	0.1	0.432212079328971	0.182988552530985	0.445329703945649	-0.109340592108703	0.789773032840575	0.57954606568115	Mon Dec 6 02:44:37 2021
0.360495584301992	s24	17	ridge_mdtb4002_wb_indv_17_alpha_4	glm7	sc1	sc2	sess	True	True	mdtb4002_wb_indv_17	cerebellum_suit	crossed	all	True	0.1	0.203565914224428	0.016977243719005	0.206192914360851	-0.587614171278299	0.647070536682014	0.294141073364029	Mon Dec 6 02:44:37 2021
0.321282241586562	s25	17	ridge_mdtb4002_wb_indv_17_alpha_4	glm7	sc1	sc2	sess	True	True	mdtb4002_wb_indv_17	cerebellum_suit	crossed	all	True	0.1	0.238560350602529	0.022961421111705	0.280142802216838	-0.439714395566324	0.674494889302418	0.348989778604837	Mon Dec 6 02:44:37 2021
0.309826516364889	s26	17	ridge_mdtb4002_wb_indv_17_alpha_4	glm7	sc1	sc2	sess	True	True	mdtb4002_wb_indv_17	cerebellum_suit	crossed	all	True	0.1	0.305818595552923	0.081185272444916	0.379621975955543	-0.240756048088914	0.700130077952111	0.400260155904222	Mon Dec 6 02:44:37 2021
0.332018567707188	s27	17	ridge_mdtb4002_wb_indv_17_alpha_4	glm7	sc1	sc2	sess	True	True	mdtb4002_wb_indv_17	cerebellum_suit	crossed	all	True	0.1	0.31782109800413	0.095784113751691	0.361738248230639	-0.276523503538723	0.741180244047569	0.482360488095138	Mon Dec 6 02:44:37 2021
0.340688443260233	s28	17	ridge_mdtb4002_wb_indv_17_alpha_4	glm7	sc1	sc2	sess	True	True	mdtb4002_wb_indv_17	cerebellum_suit	crossed	all	True	0.1	0.190329739252277	-0.009254393511409	0.187533468804654	-0.624933062390691	0.595929225357424	0.191858450714849	Mon Dec 6 02:44:37 2021
0.438064552121966	s29	17	ridge_mdtb4002_wb_indv_17_alpha_4	glm7	sc1	sc2	sess	True	True	mdtb4002_wb_indv_17	cerebellum_suit	crossed	all	True	0.1	0.250459382492657	0.051707267583825	0.208071450849161	-0.583857098301678	0.701118024958816	0.402236049917631	Mon Dec 6 02:44:37 2021
0.41644014603162	s30	17	ridge_mdtb4002_wb_indv_17_alpha_4	glm7	sc1	sc2	sess	True	True	mdtb4002_wb_indv_17	cerebellum_suit	crossed	all	True	0.1	0.124565664684641	-0.064293857880532	0.070360485085245	-0.859279029829511	0.583846744300851	0.167693488601702	Mon Dec 6 02:44:37 2021
0.358470634194494	s31	17	ridge_mdtb4002_wb_indv_17_alpha_4	glm7	sc1	sc2	sess	True	True	mdtb4002_wb_indv_17	cerebellum_suit	crossed	all	True	0.1	0.167828395425705	-0.017620126476043	0.113204759286153	-0.773590481427694	0.584798353270262	0.169596706540523	Mon Dec 6 02:44:37 2021
0.304228658287488	s02	10	ridge_mdtb4002_wb_indv_10_alpha_2	glm7	sc1	sc2	sess	True	True	mdtb4002_wb_indv_10	cerebellum_suit	crossed	all	True	0.1	0.281974524471595	0.011132989839479	0.250541465626943	-0.498917068746113	0.750352346950233	0.500704693900466	Mon Dec 6 02:44:36 2021
0.31254144608202	s03	10	ridge_mdtb4002_wb_indv_10_alpha_2	glm7	sc1	sc2	sess	True	True	mdtb4002_wb_indv_10	cerebellum_suit	crossed	all	True	0.1	0.313484404820386	0.033013001027436	0.269163903291232	-0.461672193417536	0.827622859887735	0.65524571977547	Mon Dec 6 02:44:36 2021
0.334640427495178	s04	10	ridge_mdtb4002_wb_indv_10_alpha_2	glm7	sc1	sc2	sess	True	True	mdtb4002_wb_indv_10	cerebellum_suit	crossed	all	True	0.1	0.123926328655323	-0.075182426087682	0.129791907993994	-0.740416184012013	0.712002952045597	0.424005904091194	Mon Dec 6 02:44:36 2021
0.327691562024052	s06	10	ridge_mdtb4002_wb_indv_10_alpha_2	glm7	sc1	sc2	sess	True	True	mdtb4002_wb_indv_10	cerebellum_suit	crossed	all	True	0.1	0.320221154713026	0.014576516521998	0.438928642287505	-0.12214271542499	0.852599250047321	0.705198500094642	Mon Dec 6 02:44:36 2021
0.341718695623266	s08	10	ridge_mdtb4002_wb_indv_10_alpha_2	glm7	sc1	sc2	sess	True	True	mdtb4002_wb_indv_10	cerebellum_suit	crossed	all	True	0.1	0.229595985246428	-0.008321674456112	0.216358495364167	-0.567283009271665	0.691759987736052	0.383519975472103	Mon Dec 6 02:44:36 2021
0.348151932402749	s09	10	ridge_mdtb4002_wb_indv_10_alpha_2	glm7	sc1	sc2	sess	True	True	mdtb4002_wb_indv_10	cerebellum_suit	crossed	all	True	0.1	0.356088214376487	0.102776138519405	0.372356589815305	-0.255286820369391	0.817988038323502	0.635976076647004	Mon Dec 6 02:44:36 2021
0.308093918939977	s10	10	ridge_mdtb4002_wb_indv_10_alpha_2	glm7	sc1	sc2	sess	True	True	mdtb4002_wb_indv_10	cerebellum_suit	crossed	all	True	0.1	0.375652285766313	0.098590760720794	0.299251181934321	-0.401497636131359	0.87684024340477	0.75368048680954	Mon Dec 6 02:44:36 2021
0.382198852879895	s12	10	ridge_mdtb4002_wb_indv_10_alpha_2	glm7	sc1	sc2	sess	True	True	mdtb4002_wb_indv_10	cerebellum_suit	crossed	all	True	0.1	0.299390746336265	-0.08529382342307	0.24555591625875	-0.5088881674825	0.896857002243065	0.79371400448613	Mon Dec 6 02:44:36 2021
0.333917074777965	s14	10	ridge_mdtb4002_wb_indv_10_alpha_2	glm7	sc1	sc2	sess	True	True	mdtb4002_wb_indv_10	cerebellum_suit	crossed	all	True	0.1	0.121631945559747	-0.116032535717177	0.333939338007503	-0.332121323984993	0.900021555079991	0.800043110159982	Mon Dec 6 02:44:36 2021
0.379921518948716	s15	10	ridge_mdtb4002_wb_indv_10_alpha_2	glm7	sc1	sc2	sess	True	True	mdtb4002_wb_indv_10	cerebellum_suit	crossed	all	True	0.1	0.170233813847961	-0.19453413837353	0.281911854547391	-0.436176290905218	0.864641101222369	0.729282202444738	Mon Dec 6 02:44:36 2021
0.387572622565225	s17	10	ridge_mdtb4002_wb_indv_10_alpha_2	glm7	sc1	sc2	sess	True	True	mdtb4002_wb_indv_10	cerebellum_suit	crossed	all	True	0.1	0.38372568925053	0.108437869942261	0.403711442324702	-0.192577115350598	0.836778854057842	0.673557708115683	Mon Dec 6 02:44:36 2021
0.305604630390663	s18	10	ridge_mdtb4002_wb_indv_10_alpha_2	glm7	sc1	sc2	sess	True	True	mdtb4002_wb_indv_10	cerebellum_suit	crossed	all	True	0.1	0.176271161942435	-0.132092968747833	0.215557982278809	-0.568884035442381	0.826464086416869	0.652928172833738	Mon Dec 6 02:44:36 2021
0.292634452269577	s19	10	ridge_mdtb4002_wb_indv_10_alpha_2	glm7	sc1	sc2	sess	True	True	mdtb4002_wb_indv_10	cerebellum_suit	crossed	all	True	0.1	0.238035409378332	-0.048709298562133	0.254240109492353	-0.491519781015295	0.813454373472795	0.62690874694559	Mon Dec 6 02:44:36 2021
0.341570798810878	s20	10	ridge_mdtb4002_wb_indv_10_alpha_2	glm7	sc1	sc2	sess	True	True	mdtb4002_wb_indv_10	cerebellum_suit	crossed	all	True	0.1	0.317055599398961	0.076028724435959	0.325037423570484	-0.349925152859032	0.619038218383795	0.238076436767589	Mon Dec 6 02:44:36 2021
0.350904593357521	s21	10	ridge_mdtb4002_wb_indv_10_alpha_2	glm7	sc1	sc2	sess	True	True	mdtb4002_wb_indv_10	cerebellum_suit	crossed	all	True	0.1	0.082371288427124	-0.168588299682411	0.195871779559683	-0.608256440880633	0.638819327822946	0.277638655645893	Mon Dec 6 02:44:36 2021
0.346939265378399	s22	10	ridge_mdtb4002_wb_indv_10_alpha_2	glm7	sc1	sc2	sess	True	True	mdtb4002_wb_indv_10	cerebellum_suit	crossed	all	True	0.1	0.430425113518956	0.130081002889158	0.445329703945649	-0.109340592108703	0.837882529891298	0.675765059782596	Mon Dec 6 02:44:36 2021
0.372764307074594	s24	10	ridge_mdtb4002_wb_indv_10_alpha_2	glm7	sc1	sc2	sess	True	True	mdtb4002_wb_indv_10	cerebellum_suit	crossed	all	True	0.1	0.194660159439829	-0.050901074769373	0.206192914360851	-0.587614171278299	0.711673795745205	0.42334759149041	Mon Dec 6 02:44:36 2021
0.33378308727529	s25	10	ridge_mdtb4002_wb_indv_10_alpha_2	glm7	sc1	sc2	sess	True	True	mdtb4002_wb_indv_10	cerebellum_suit	crossed	all	True	0.1	0.233640554409168	-0.053043155561821	0.280142802216838	-0.439714395566324	0.715548411660479	0.431096823320958	Mon Dec 6 02:44:36 2021
0.314684982898772	s26	10	ridge_mdtb4002_wb_indv_10_alpha_2	glm7	sc1	sc2	sess	True	True	mdtb4002_wb_indv_10	cerebellum_suit	crossed	all	True	0.1	0.337670198270154	0.058362377930867	0.379621975955543	-0.240756048088914	0.770783724848755	0.54156744969751	Mon Dec 6 02:44:36 2021
0.346225954705696	s27	10	ridge_mdtb4002_wb_indv_10_alpha_2	glm7	sc1	sc2	sess	True	True	mdtb4002_wb_indv_10	cerebellum_suit	crossed	all	True	0.1	0.287250559979808	0.014761500946016	0.361738248230639	-0.276523503538723	0.829697028135194	0.659394056270389	Mon Dec 6 02:44:36 2021
0.365423367042922	s28	10	ridge_mdtb4002_wb_indv_10_alpha_2	glm7	sc1	sc2	sess	True	True	mdtb4002_wb_indv_10	cerebellum_suit	crossed	all	True	0.1	0.174157427579545	-0.159576827762409	0.187533468804654	-0.624933062390691	0.600462020193378	0.200924040386757	Mon Dec 6 02:44:36 2021
0.454698889899947	s29	10	ridge_mdtb4002_wb_indv_10_alpha_2	glm7	sc1	sc2	sess	True	True	mdtb4002_wb_indv_10	cerebellum_suit	crossed	all	True	0.1	0.226136612872561	-0.022680315146301	0.208071450849161	-0.583857098301678	0.701923043087945	0.40384608617589	Mon Dec 6 02:44:36 2021
0.441026330326842	s30	10	ridge_mdtb4002_wb_indv_10_alpha_2	glm7	sc1	sc2	sess	True	True	mdtb4002_wb_indv_10	cerebellum_suit	crossed	all	True	0.1	0.108321132158211	-0.179690327065504	0.070360485085245	-0.859279029829511	0.543674543127891	0.087349086255783	Mon Dec 6 02:44:36 2021
0.377363297829496	s31	10	ridge_mdtb4002_wb_indv_10_alpha_2	glm7	sc1	sc2	sess	True	True	mdtb4002_wb_indv_10	cerebellum_suit	crossed	all	True	0.1	0.14621629524266	-0.127540214050188	0.113204759286153	-0.773590481427694	0.632709569739938	0.265419139479875	Mon Dec 6 02:44:36 2021
0.299074893088575	s02	300	ridge_mdtb1002_150_alpha_6	glm7	sc1	sc2	sess	True	True	mdtb1002_150	cerebellum_suit	crossed	all	True	0.1	0.256539216419385	0.042075904665181	0.250541465626943	-0.498917068746113	0.55874421666891	0.117488433337819	Mon Dec 6 02:44:32 2021
0.30291157083287	s03	300	ridge_mdtb1002_150_alpha_6	glm7	sc1	sc2	sess	True	True	mdtb1002_150	cerebellum_suit	crossed	all	True	0.1	0.321862232666764	0.089706673194347	0.269163903291232	-0.461672193417536	0.716285282926784	0.432570565853568	Mon Dec 6 02:44:32 2021
0.32640459404596	s04	300	ridge_mdtb1002_150_alpha_6	glm7	sc1	sc2	sess	True	True	mdtb1002_150	cerebellum_suit	crossed	all	True	0.1	0.125353207890024	-0.024776305103386	0.129791907993994	-0.740416184012013	0.512722669823221	0.025445339646443	Mon Dec 6 02:44:32 2021
0.304067965613102	s06	300	ridge_mdtb1002_150_alpha_6	glm7	sc1	sc2	sess	True	True	mdtb1002_150	cerebellum_suit	crossed	all	True	0.1	0.393971629543439	0.154812493422928	0.438928642287505	-0.12214271542499	0.789266604413189	0.578533208826378	Mon Dec 6 02:44:32 2021
0.336274378431838	s08	300	ridge_mdtb1002_150_alpha_6	glm7	sc1	sc2	sess	True	True	mdtb1002_150	cerebellum_suit	crossed	all	True	0.1	0.224800828769484	0.023027943586814	0.216358495364167	-0.567283009271665	0.560811272784176	0.121622545568352	Mon Dec 6 02:44:32 2021
0.343345211391052	s09	300	ridge_mdtb1002_150_alpha_6	glm7	sc1	sc2	sess	True	True	mdtb1002_150	cerebellum_suit	crossed	all	True	0.1	0.339937286479212	0.11407071804692	0.372356589815305	-0.255286820369391	0.722674499053759	0.445348998107517	Mon Dec 6 02:44:32 2021
0.304006937698358	s10	300	ridge_mdtb1002_150_alpha_6	glm7	sc1	sc2	sess	True	True	mdtb1002_150	cerebellum_suit	crossed	all	True	0.1	0.361373770940957	0.120387896657961	0.299251181934321	-0.401497636131359	0.793740673650307	0.587481347300615	Mon Dec 6 02:44:32 2021
0.360788049752504	s12	300	ridge_mdtb1002_150_alpha_6	glm7	sc1	sc2	sess	True	True	mdtb1002_150	cerebellum_suit	crossed	all	True	0.1	0.278352840480988	0.038438891289774	0.24555591625875	-0.5088881674825	0.723476889595492	0.446953779190984	Mon Dec 6 02:44:32 2021
0.314662045994068	s14	300	ridge_mdtb1002_150_alpha_6	glm7	sc1	sc2	sess	True	True	mdtb1002_150	cerebellum_suit	crossed	all	True	0.1	0.104143527697613	-0.006646435094923	0.333939338007503	-0.332121323984993	0.725727238137531	0.451454476275063	Mon Dec 6 02:44:32 2021
0.347692224389514	s15	300	ridge_mdtb1002_150_alpha_6	glm7	sc1	sc2	sess	True	True	mdtb1002_150	cerebellum_suit	crossed	all	True	0.1	0.205849655462684	0.004652349413735	0.281911854547391	-0.436176290905218	0.756899440587697	0.513798881175394	Mon Dec 6 02:44:32 2021
0.374625952686886	s17	300	ridge_mdtb1002_150_alpha_6	glm7	sc1	sc2	sess	True	True	mdtb1002_150	cerebellum_suit	crossed	all	True	0.1	0.398838893249213	0.157084366085103	0.403711442324702	-0.192577115350598	0.765452730778545	0.530905461557089	Mon Dec 6 02:44:32 2021
0.295582688252817	s18	300	ridge_mdtb1002_150_alpha_6	glm7	sc1	sc2	sess	True	True	mdtb1002_150	cerebellum_suit	crossed	all	True	0.1	0.150542999682632	-0.05419474712431	0.215557982278809	-0.568884035442381	0.633623309283943	0.267246618567886	Mon Dec 6 02:44:32 2021
0.278731942522705	s19	300	ridge_mdtb1002_150_alpha_6	glm7	sc1	sc2	sess	True	True	mdtb1002_150	cerebellum_suit	crossed	all	True	0.1	0.253595082506623	0.054083752157599	0.254240109492353	-0.491519781015295	0.642635261145517	0.285270522291034	Mon Dec 6 02:44:32 2021
0.342076772745333	s20	300	ridge_mdtb1002_150_alpha_6	glm7	sc1	sc2	sess	True	True	mdtb1002_150	cerebellum_suit	crossed	all	True	0.1	0.292562547399591	0.06537695941554	0.325037423570484	-0.349925152859032	0.524878840466923	0.049757680933846	Mon Dec 6 02:44:32 2021
0.33292561845633	s21	300	ridge_mdtb1002_150_alpha_6	glm7	sc1	sc2	sess	True	True	mdtb1002_150	cerebellum_suit	crossed	all	True	0.1	0.120030591577188	-0.045019558849437	0.195871779559683	-0.608256440880633	0.399913226776789	-0.200173546446422	Mon Dec 6 02:44:32 2021
0.339197462459908	s22	300	ridge_mdtb1002_150_alpha_6	glm7	sc1	sc2	sess	True	True	mdtb1002_150	cerebellum_suit	crossed	all	True	0.1	0.398082806311812	0.150930147075617	0.445329703945649	-0.109340592108703	0.706443802615659	0.412887605231318	Mon Dec 6 02:44:32 2021
0.365593018027187	s24	300	ridge_mdtb1002_150_alpha_6	glm7	sc1	sc2	sess	True	True	mdtb1002_150	cerebellum_suit	crossed	all	True	0.1	0.180536109604038	-0.007428864806797	0.206192914360851	-0.587614171278299	0.585297833627922	0.170595667255845	Mon Dec 6 02:44:32 2021
0.320461080623555	s25	300	ridge_mdtb1002_150_alpha_6	glm7	sc1	sc2	sess	True	True	mdtb1002_150	cerebellum_suit	crossed	all	True	0.1	0.264475976913507	0.030923844828478	0.280142802216838	-0.439714395566324	0.557529105797751	0.115058211595502	Mon Dec 6 02:44:32 2021
0.318294199585703	s26	300	ridge_mdtb1002_150_alpha_6	glm7	sc1	sc2	sess	True	True	mdtb1002_150	cerebellum_suit	crossed	all	True	0.1	0.254560687801666	0.028145326135579	0.379621975955543	-0.240756048088914	0.532046828040825	0.06409365608165	Mon Dec 6 02:44:32 2021
0.341155511752186	s27	300	ridge_mdtb1002_150_alpha_6	glm7	sc1	sc2	sess	True	True	mdtb1002_150	cerebellum_suit	crossed	all	True	0.1	0.261631683934604	0.042405180756777	0.361738248230639	-0.276523503538723	0.670277244491735	0.34055448898347	Mon Dec 6 02:44:32 2021
0.337877986746263	s28	300	ridge_mdtb1002_150_alpha_6	glm7	sc1	sc2	sess	True	True	mdtb1002_150	cerebellum_suit	crossed	all	True	0.1	0.18445432448928	0.008091299746628	0.187533468804654	-0.624933062390691	0.620793402773095	0.24158680554619	Mon Dec 6 02:44:33 2021
0.446944568653115	s29	300	ridge_mdtb1002_150_alpha_6	glm7	sc1	sc2	sess	True	True	mdtb1002_150	cerebellum_suit	crossed	all	True	0.1	0.217415485907213	0.006590143285775	0.208071450849161	-0.583857098301678	0.544587840715882	0.089175681431764	Mon Dec 6 02:44:33 2021
0.417622784330918	s30	300	ridge_mdtb1002_150_alpha_6	glm7	sc1	sc2	sess	True	True	mdtb1002_150	cerebellum_suit	crossed	all	True	0.1	0.116982200966815	-0.071914298237589	0.070360485085245	-0.859279029829511	0.414627025555999	-0.170745948888002	Mon Dec 6 02:44:33 2021
0.359614660700059	s31	300	ridge_mdtb1002_150_alpha_6	glm7	sc1	sc2	sess	True	True	mdtb1002_150	cerebellum_suit	crossed	all	True	0.1	0.145472904532094	-0.028402658795578	0.113204759286153	-0.773590481427694	0.437645157023394	-0.124709685953211	Mon Dec 6 02:44:33 2021
0.297905876899184	s02	200	ridge_mdtb1002_100_alpha_6	glm7	sc1	sc2	sess	True	True	mdtb1002_100	cerebellum_suit	crossed	all	True	0.1	0.252479017871374	0.04860257252728	0.250541465626943	-0.498917068746113	0.54845517134045	0.0969103426809	Mon Dec 6 02:44:31 2021
0.301527940617631	s03	200	ridge_mdtb1002_100_alpha_6	glm7	sc1	sc2	sess	True	True	mdtb1002_100	cerebellum_suit	crossed	all	True	0.1	0.32001023071422	0.096562290719172	0.269163903291232	-0.461672193417536	0.693763674282999	0.387527348565999	Mon Dec 6 02:44:31 2021
0.326049890726922	s04	200	ridge_mdtb1002_100_alpha_6	glm7	sc1	sc2	sess	True	True	mdtb1002_100	cerebellum_suit	crossed	all	True	0.1	0.11926317400847	-0.021854878504908	0.129791907993994	-0.740416184012013	0.497232022362081	-0.005535955275839	Mon Dec 6 02:44:31 2021
0.30171979134335	s06	200	ridge_mdtb1002_100_alpha_6	glm7	sc1	sc2	sess	True	True	mdtb1002_100	cerebellum_suit	crossed	all	True	0.1	0.411851284604625	0.167331013647273	0.438928642287505	-0.12214271542499	0.799232321306267	0.598464642612534	Mon Dec 6 02:44:31 2021
0.333082908938183	s08	200	ridge_mdtb1002_100_alpha_6	glm7	sc1	sc2	sess	True	True	mdtb1002_100	cerebellum_suit	crossed	all	True	0.1	0.232991200308648	0.040457056512753	0.216358495364167	-0.567283009271665	0.588506750135966	0.177013500271932	Mon Dec 6 02:44:31 2021
0.342065589560135	s09	200	ridge_mdtb1002_100_alpha_6	glm7	sc1	sc2	sess	True	True	mdtb1002_100	cerebellum_suit	crossed	all	True	0.1	0.344320746549732	0.118039159567131	0.372356589815305	-0.255286820369391	0.723001423900026	0.446002847800052	Mon Dec 6 02:44:31 2021
0.301867114116784	s10	200	ridge_mdtb1002_100_alpha_6	glm7	sc1	sc2	sess	True	True	mdtb1002_100	cerebellum_suit	crossed	all	True	0.1	0.367053977194126	0.131529166596739	0.299251181934321	-0.401497636131359	0.79853319857419	0.597066397148381	Mon Dec 6 02:44:31 2021
0.353204588888702	s12	200	ridge_mdtb1002_100_alpha_6	glm7	sc1	sc2	sess	True	True	mdtb1002_100	cerebellum_suit	crossed	all	True	0.1	0.296633209341695	0.076988334650907	0.24555591625875	-0.5088881674825	0.694846835800671	0.389693671601342	Mon Dec 6 02:44:31 2021
0.313062159102474	s14	200	ridge_mdtb1002_100_alpha_6	glm7	sc1	sc2	sess	True	True	mdtb1002_100	cerebellum_suit	crossed	all	True	0.1	0.109923818993623	0.001570170587233	0.333939338007503	-0.332121323984993	0.734291283362295	0.468582566724591	Mon Dec 6 02:44:31 2021
0.34038067951792	s15	200	ridge_mdtb1002_100_alpha_6	glm7	sc1	sc2	sess	True	True	mdtb1002_100	cerebellum_suit	crossed	all	True	0.1	0.236291634112978	0.045908056936294	0.281911854547391	-0.436176290905218	0.75153511562323	0.503070231246461	Mon Dec 6 02:44:31 2021
0.370615453800498	s17	200	ridge_mdtb1002_100_alpha_6	glm7	sc1	sc2	sess	True	True	mdtb1002_100	cerebellum_suit	crossed	all	True	0.1	0.414175855626255	0.17110110898697	0.403711442324702	-0.192577115350598	0.752071890168985	0.504143780337969	Mon Dec 6 02:44:31 2021
0.293110822051194	s18	200	ridge_mdtb1002_100_alpha_6	glm7	sc1	sc2	sess	True	True	mdtb1002_100	cerebellum_suit	crossed	all	True	0.1	0.143584619716502	-0.03735906287032	0.215557982278809	-0.568884035442381	0.622227310077441	0.244454620154882	Mon Dec 6 02:44:31 2021
0.277022039428976	s19	200	ridge_mdtb1002_100_alpha_6	glm7	sc1	sc2	sess	True	True	mdtb1002_100	cerebellum_suit	crossed	all	True	0.1	0.259121665754956	0.06441007534646	0.254240109492353	-0.491519781015295	0.648597673879025	0.297195347758049	Mon Dec 6 02:44:31 2021
0.342133515483424	s20	200	ridge_mdtb1002_100_alpha_6	glm7	sc1	sc2	sess	True	True	mdtb1002_100	cerebellum_suit	crossed	all	True	0.1	0.280819205206009	0.064030164893845	0.325037423570484	-0.349925152859032	0.466785124236937	-0.066429751526127	Mon Dec 6 02:44:31 2021
0.329760908009007	s21	200	ridge_mdtb1002_100_alpha_6	glm7	sc1	sc2	sess	True	True	mdtb1002_100	cerebellum_suit	crossed	all	True	0.1	0.113840356609399	-0.027461762903724	0.195871779559683	-0.608256440880633	0.399351533834603	-0.201296932330794	Mon Dec 6 02:44:31 2021
0.335380117625751	s22	200	ridge_mdtb1002_100_alpha_6	glm7	sc1	sc2	sess	True	True	mdtb1002_100	cerebellum_suit	crossed	all	True	0.1	0.41089968603574	0.166275879264306	0.445329703945649	-0.109340592108703	0.703405010657748	0.406810021315496	Mon Dec 6 02:44:31 2021
0.362843833343349	s24	200	ridge_mdtb1002_100_alpha_6	glm7	sc1	sc2	sess	True	True	mdtb1002_100	cerebellum_suit	crossed	all	True	0.1	0.183746701849842	0.006812221492662	0.206192914360851	-0.587614171278299	0.541497687633263	0.082995375266527	Mon Dec 6 02:44:31 2021
0.318936206513971	s25	200	ridge_mdtb1002_100_alpha_6	glm7	sc1	sc2	sess	True	True	mdtb1002_100	cerebellum_suit	crossed	all	True	0.1	0.261402707290186	0.038933122249669	0.280142802216838	-0.439714395566324	0.544635092762701	0.089270185525401	Mon Dec 6 02:44:31 2021
0.320154345925493	s26	200	ridge_mdtb1002_100_alpha_6	glm7	sc1	sc2	sess	True	True	mdtb1002_100	cerebellum_suit	crossed	all	True	0.1	0.223833687344524	0.014685369558859	0.379621975955543	-0.240756048088914	0.514069230956178	0.028138461912356	Mon Dec 6 02:44:31 2021
0.338807195955608	s27	200	ridge_mdtb1002_100_alpha_6	glm7	sc1	sc2	sess	True	True	mdtb1002_100	cerebellum_suit	crossed	all	True	0.1	0.264198649278449	0.056241779346133	0.361738248230639	-0.276523503538723	0.61652877028224	0.233057540564479	Mon Dec 6 02:44:31 2021
0.334026011789732	s28	200	ridge_mdtb1002_100_alpha_6	glm7	sc1	sc2	sess	True	True	mdtb1002_100	cerebellum_suit	crossed	all	True	0.1	0.19695575302681	0.028392436227805	0.187533468804654	-0.624933062390691	0.58824235886891	0.176484717737821	Mon Dec 6 02:44:31 2021
0.443379019693402	s29	200	ridge_mdtb1002_100_alpha_6	glm7	sc1	sc2	sess	True	True	mdtb1002_100	cerebellum_suit	crossed	all	True	0.1	0.210939198195218	0.022728044817896	0.208071450849161	-0.583857098301678	0.525035078140821	0.050070156281641	Mon Dec 6 02:44:31 2021
0.414725787042676	s30	200	ridge_mdtb1002_100_alpha_6	glm7	sc1	sc2	sess	True	True	mdtb1002_100	cerebellum_suit	crossed	all	True	0.1	0.110132238482765	-0.059977915328637	0.070360485085245	-0.859279029829511	0.434906982613797	-0.130186034772406	Mon Dec 6 02:44:31 2021
0.35690006175192	s31	200	ridge_mdtb1002_100_alpha_6	glm7	sc1	sc2	sess	True	True	mdtb1002_100	cerebellum_suit	crossed	all	True	0.1	0.141550164409268	-0.014423563879887	0.113204759286153	-0.773590481427694	0.451994322616924	-0.096011354766152	Mon Dec 6 02:44:31 2021
0.30943403327306	s02	100	ridge_mdtb1002_050_alpha_4	glm7	sc1	sc2	sess	True	True	mdtb1002_050	cerebellum_suit	crossed	all	True	0.1	0.251466268631347	-0.020672569525226	0.250541465626943	-0.498917068746113	0.585031271932438	0.170062543864876	Mon Dec 6 02:44:30 2021
0.310733561946766	s03	100	ridge_mdtb1002_050_alpha_4	glm7	sc1	sc2	sess	True	True	mdtb1002_050	cerebellum_suit	crossed	all	True	0.1	0.320338159694169	0.04669649639352	0.269163903291232	-0.461672193417536	0.70199708602654	0.403994172053079	Mon Dec 6 02:44:30 2021
0.33983515816797	s04	100	ridge_mdtb1002_050_alpha_4	glm7	sc1	sc2	sess	True	True	mdtb1002_050	cerebellum_suit	crossed	all	True	0.1	0.116553943987408	-0.106466995940192	0.129791907993994	-0.740416184012013	0.53286505044416	0.065730100888321	Mon Dec 6 02:44:30 2021
0.313698899303314	s06	100	ridge_mdtb1002_050_alpha_4	glm7	sc1	sc2	sess	True	True	mdtb1002_050	cerebellum_suit	crossed	all	True	0.1	0.379146522585922	0.108893359356934	0.438928642287505	-0.12214271542499	0.778710225524006	0.557420451048012	Mon Dec 6 02:44:30 2021
0.351879149315757	s08	100	ridge_mdtb1002_050_alpha_4	glm7	sc1	sc2	sess	True	True	mdtb1002_050	cerebellum_suit	crossed	all	True	0.1	0.231732258676362	-0.060176495819213	0.216358495364167	-0.567283009271665	0.635688966761473	0.271377933522946	Mon Dec 6 02:44:30 2021
0.346172176446915	s09	100	ridge_mdtb1002_050_alpha_4	glm7	sc1	sc2	sess	True	True	mdtb1002_050	cerebellum_suit	crossed	all	True	0.1	0.358101130734152	0.109920848900298	0.372356589815305	-0.255286820369391	0.741042272874545	0.482084545749089	Mon Dec 6 02:44:30 2021
0.310588545404795	s10	100	ridge_mdtb1002_050_alpha_4	glm7	sc1	sc2	sess	True	True	mdtb1002_050	cerebellum_suit	crossed	all	True	0.1	0.354314346454124	0.084622069252031	0.299251181934321	-0.401497636131359	0.773123414551353	0.546246829102706	Mon Dec 6 02:44:30 2021
0.376835873098317	s12	100	ridge_mdtb1002_050_alpha_4	glm7	sc1	sc2	sess	True	True	mdtb1002_050	cerebellum_suit	crossed	all	True	0.1	0.281100092816095	-0.049981804605627	0.24555591625875	-0.5088881674825	0.719185364489394	0.438370728978789	Mon Dec 6 02:44:30 2021
0.328934623177779	s14	100	ridge_mdtb1002_050_alpha_4	glm7	sc1	sc2	sess	True	True	mdtb1002_050	cerebellum_suit	crossed	all	True	0.1	0.108215233665625	-0.08333321803699	0.333939338007503	-0.332121323984993	0.759105062015004	0.518210124030008	Mon Dec 6 02:44:30 2021
0.357577973345698	s15	100	ridge_mdtb1002_050_alpha_4	glm7	sc1	sc2	sess	True	True	mdtb1002_050	cerebellum_suit	crossed	all	True	0.1	0.21439626120989	-0.047391915868711	0.281911854547391	-0.436176290905218	0.758391739941442	0.516783479882883	Mon Dec 6 02:44:30 2021
0.378483339722433	s17	100	ridge_mdtb1002_050_alpha_4	glm7	sc1	sc2	sess	True	True	mdtb1002_050	cerebellum_suit	crossed	all	True	0.1	0.407843046187503	0.149650775390387	0.403711442324702	-0.192577115350598	0.793036694694469	0.586073389388939	Mon Dec 6 02:44:30 2021
0.308940608673312	s18	100	ridge_mdtb1002_050_alpha_4	glm7	sc1	sc2	sess	True	True	mdtb1002_050	cerebellum_suit	crossed	all	True	0.1	0.13915097558867	-0.153801942372603	0.215557982278809	-0.568884035442381	0.620609674791353	0.241219349582705	Mon Dec 6 02:44:30 2021
0.287695715370288	s19	100	ridge_mdtb1002_050_alpha_4	glm7	sc1	sc2	sess	True	True	mdtb1002_050	cerebellum_suit	crossed	all	True	0.1	0.239235189084506	-0.00973590891852	0.254240109492353	-0.491519781015295	0.716092422086153	0.432184844172307	Mon Dec 6 02:44:30 2021
0.344878822099137	s20	100	ridge_mdtb1002_050_alpha_4	glm7	sc1	sc2	sess	True	True	mdtb1002_050	cerebellum_suit	crossed	all	True	0.1	0.307474074230811	0.057888820233128	0.325037423570484	-0.349925152859032	0.533574588571379	0.067149177142758	Mon Dec 6 02:44:30 2021
0.344275628035214	s21	100	ridge_mdtb1002_050_alpha_4	glm7	sc1	sc2	sess	True	True	mdtb1002_050	cerebellum_suit	crossed	all	True	0.1	0.126522885297162	-0.111425840109757	0.195871779559683	-0.608256440880633	0.49390444964319	-0.012191100713621	Mon Dec 6 02:44:30 2021
0.345403715942126	s22	100	ridge_mdtb1002_050_alpha_4	glm7	sc1	sc2	sess	True	True	mdtb1002_050	cerebellum_suit	crossed	all	True	0.1	0.419576420448806	0.136236107768569	0.445329703945649	-0.109340592108703	0.738324528176847	0.476649056353693	Mon Dec 6 02:44:30 2021
0.374591516325257	s24	100	ridge_mdtb1002_050_alpha_4	glm7	sc1	sc2	sess	True	True	mdtb1002_050	cerebellum_suit	crossed	all	True	0.1	0.192051012726112	-0.055122685514174	0.206192914360851	-0.587614171278299	0.557864583197749	0.115729166395498	Mon Dec 6 02:44:30 2021
0.337132555005217	s25	100	ridge_mdtb1002_050_alpha_4	glm7	sc1	sc2	sess	True	True	mdtb1002_050	cerebellum_suit	crossed	all	True	0.1	0.250797523745263	-0.067665878986705	0.280142802216838	-0.439714395566324	0.568406473287312	0.136812946574625	Mon Dec 6 02:44:30 2021
0.328739268193194	s26	100	ridge_mdtb1002_050_alpha_4	glm7	sc1	sc2	sess	True	True	mdtb1002_050	cerebellum_suit	crossed	all	True	0.1	0.263562337455522	-0.027878888022371	0.379621975955543	-0.240756048088914	0.590618636953757	0.181237273907514	Mon Dec 6 02:44:30 2021
0.345938790562515	s27	100	ridge_mdtb1002_050_alpha_4	glm7	sc1	sc2	sess	True	True	mdtb1002_050	cerebellum_suit	crossed	all	True	0.1	0.299952650348466	0.018599481368294	0.361738248230639	-0.276523503538723	0.772657569430683	0.545315138861366	Mon Dec 6 02:44:30 2021
0.348948445698669	s28	100	ridge_mdtb1002_050_alpha_4	glm7	sc1	sc2	sess	True	True	mdtb1002_050	cerebellum_suit	crossed	all	True	0.1	0.180083613689835	-0.049423431306243	0.187533468804654	-0.624933062390691	0.522765554782139	0.045531109564279	Mon Dec 6 02:44:30 2021
0.469088113271799	s29	100	ridge_mdtb1002_050_alpha_4	glm7	sc1	sc2	sess	True	True	mdtb1002_050	cerebellum_suit	crossed	all	True	0.1	0.192168414360488	-0.095820841132715	0.208071450849161	-0.583857098301678	0.476450555589847	-0.047098888820306	Mon Dec 6 02:44:30 2021
0.443057088545536	s30	100	ridge_mdtb1002_050_alpha_4	glm7	sc1	sc2	sess	True	True	mdtb1002_050	cerebellum_suit	crossed	all	True	0.1	0.11514316926064	-0.19227198510628	0.070360485085245	-0.859279029829511	0.371975457623381	-0.256049084753238	Mon Dec 6 02:44:30 2021
0.375885309338433	s31	100	ridge_mdtb1002_050_alpha_4	glm7	sc1	sc2	sess	True	True	mdtb1002_050	cerebellum_suit	crossed	all	True	0.1	0.141863300946887	-0.118856107729755	0.113204759286153	-0.773590481427694	0.511948642818775	0.023897285637549	Mon Dec 6 02:44:30 2021
0.30094722028997	s02	50	ridge_mdtb1002_025_alpha_4	glm7	sc1	sc2	sess	True	True	mdtb1002_025	cerebellum_suit	crossed	all	True	0.1	0.279120995066717	0.034512981674433	0.250541465626943	-0.498917068746113	0.688345760668919	0.376691521337837	Mon Dec 6 02:44:29 2021
0.309240163556148	s03	50	ridge_mdtb1002_025_alpha_4	glm7	sc1	sc2	sess	True	True	mdtb1002_025	cerebellum_suit	crossed	all	True	0.1	0.315275300181994	0.053539637355324	0.269163903291232	-0.461672193417536	0.783583465100911	0.567166930201821	Mon Dec 6 02:44:29 2021
0.33306745880283	s04	50	ridge_mdtb1002_025_alpha_4	glm7	sc1	sc2	sess	True	True	mdtb1002_025	cerebellum_suit	crossed	all	True	0.1	0.118177650905123	-0.06471434906534	0.129791907993994	-0.740416184012013	0.656285638790177	0.312571277580355	Mon Dec 6 02:44:29 2021
0.310766126976568	s06	50	ridge_mdtb1002_025_alpha_4	glm7	sc1	sc2	sess	True	True	mdtb1002_025	cerebellum_suit	crossed	all	True	0.1	0.378914730432954	0.123042022704079	0.438928642287505	-0.12214271542499	0.818579802067117	0.637159604134234	Mon Dec 6 02:44:29 2021
0.338971791385198	s08	50	ridge_mdtb1002_025_alpha_4	glm7	sc1	sc2	sess	True	True	mdtb1002_025	cerebellum_suit	crossed	all	True	0.1	0.25331888113273	0.011427351084998	0.216358495364167	-0.567283009271665	0.671831929942218	0.343663859884436	Mon Dec 6 02:44:29 2021
0.342779943048104	s09	50	ridge_mdtb1002_025_alpha_4	glm7	sc1	sc2	sess	True	True	mdtb1002_025	cerebellum_suit	crossed	all	True	0.1	0.363060422487512	0.124234390281099	0.372356589815305	-0.255286820369391	0.77041577033445	0.5408315406689	Mon Dec 6 02:44:29 2021
0.303240934740874	s10	50	ridge_mdtb1002_025_alpha_4	glm7	sc1	sc2	sess	True	True	mdtb1002_025	cerebellum_suit	crossed	all	True	0.1	0.378240525090553	0.126862265804598	0.299251181934321	-0.401497636131359	0.839189018889702	0.678378037779405	Mon Dec 6 02:44:29 2021
0.363933656962397	s12	50	ridge_mdtb1002_025_alpha_4	glm7	sc1	sc2	sess	True	True	mdtb1002_025	cerebellum_suit	crossed	all	True	0.1	0.303862140810701	0.022088387163584	0.24555591625875	-0.5088881674825	0.817189166774788	0.634378333549575	Mon Dec 6 02:44:29 2021
0.31885532066331	s14	50	ridge_mdtb1002_025_alpha_4	glm7	sc1	sc2	sess	True	True	mdtb1002_025	cerebellum_suit	crossed	all	True	0.1	0.149579909303967	-0.02663426649363	0.333939338007503	-0.332121323984993	0.819658072271173	0.639316144542345	Mon Dec 6 02:44:29 2021
0.353192148105057	s15	50	ridge_mdtb1002_025_alpha_4	glm7	sc1	sc2	sess	True	True	mdtb1002_025	cerebellum_suit	crossed	all	True	0.1	0.21861797159731	-0.022673688673419	0.281911854547391	-0.436176290905218	0.81805094714451	0.63610189428902	Mon Dec 6 02:44:29 2021
0.377841674974229	s17	50	ridge_mdtb1002_025_alpha_4	glm7	sc1	sc2	sess	True	True	mdtb1002_025	cerebellum_suit	crossed	all	True	0.1	0.406052312604336	0.149215164365868	0.403711442324702	-0.192577115350598	0.813872294079275	0.627744588158551	Mon Dec 6 02:44:29 2021
0.296370643499042	s18	50	ridge_mdtb1002_025_alpha_4	glm7	sc1	sc2	sess	True	True	mdtb1002_025	cerebellum_suit	crossed	all	True	0.1	0.17946917269424	-0.059483852569878	0.215557982278809	-0.568884035442381	0.686026953134799	0.372053906269597	Mon Dec 6 02:44:29 2021
0.283884655046793	s19	50	ridge_mdtb1002_025_alpha_4	glm7	sc1	sc2	sess	True	True	mdtb1002_025	cerebellum_suit	crossed	all	True	0.1	0.241965156795035	0.014172158544127	0.254240109492353	-0.491519781015295	0.708819682388748	0.417639364777497	Mon Dec 6 02:44:29 2021
0.343719026002868	s20	50	ridge_mdtb1002_025_alpha_4	glm7	sc1	sc2	sess	True	True	mdtb1002_025	cerebellum_suit	crossed	all	True	0.1	0.301539281257183	0.06208421149966	0.325037423570484	-0.349925152859032	0.569056522731757	0.138113045463514	Mon Dec 6 02:44:29 2021
0.342677537102391	s21	50	ridge_mdtb1002_025_alpha_4	glm7	sc1	sc2	sess	True	True	mdtb1002_025	cerebellum_suit	crossed	all	True	0.1	0.108202293979674	-0.112142987337077	0.195871779559683	-0.608256440880633	0.479397443625344	-0.041205112749312	Mon Dec 6 02:44:29 2021
0.339465212048983	s22	50	ridge_mdtb1002_025_alpha_4	glm7	sc1	sc2	sess	True	True	mdtb1002_025	cerebellum_suit	crossed	all	True	0.1	0.431347525424529	0.165288589278486	0.445329703945649	-0.109340592108703	0.772863299158633	0.545726598317267	Mon Dec 6 02:44:29 2021
0.369234474950656	s24	50	ridge_mdtb1002_025_alpha_4	glm7	sc1	sc2	sess	True	True	mdtb1002_025	cerebellum_suit	crossed	all	True	0.1	0.179200221322051	-0.030479756438093	0.206192914360851	-0.587614171278299	0.623411389714941	0.246822779429883	Mon Dec 6 02:44:29 2021
0.326513298434084	s25	50	ridge_mdtb1002_025_alpha_4	glm7	sc1	sc2	sess	True	True	mdtb1002_025	cerebellum_suit	crossed	all	True	0.1	0.267306696685292	-0.003151826202717	0.280142802216838	-0.439714395566324	0.684726552871257	0.369453105742515	Mon Dec 6 02:44:29 2021
0.318443941984002	s26	50	ridge_mdtb1002_025_alpha_4	glm7	sc1	sc2	sess	True	True	mdtb1002_025	cerebellum_suit	crossed	all	True	0.1	0.284180493060772	0.034383319689379	0.379621975955543	-0.240756048088914	0.673681877164563	0.347363754329126	Mon Dec 6 02:44:29 2021
0.340026381804804	s27	50	ridge_mdtb1002_025_alpha_4	glm7	sc1	sc2	sess	True	True	mdtb1002_025	cerebellum_suit	crossed	all	True	0.1	0.30132681351562	0.051900537506561	0.361738248230639	-0.276523503538723	0.772783857793887	0.545567715587774	Mon Dec 6 02:44:29 2021
0.337449579405701	s28	50	ridge_mdtb1002_025_alpha_4	glm7	sc1	sc2	sess	True	True	mdtb1002_025	cerebellum_suit	crossed	all	True	0.1	0.199243272528638	0.013319452532903	0.187533468804654	-0.624933062390691	0.654773382602648	0.309546765205297	Mon Dec 6 02:44:29 2021
0.450764314689147	s29	50	ridge_mdtb1002_025_alpha_4	glm7	sc1	sc2	sess	True	True	mdtb1002_025	cerebellum_suit	crossed	all	True	0.1	0.217544508250172	-0.00631741943733	0.208071450849161	-0.583857098301678	0.621930963260218	0.243861926520437	Mon Dec 6 02:44:29 2021
0.428254140657551	s30	50	ridge_mdtb1002_025_alpha_4	glm7	sc1	sc2	sess	True	True	mdtb1002_025	cerebellum_suit	crossed	all	True	0.1	0.132044695761001	-0.116285092410725	0.070360485085245	-0.859279029829511	0.479519403123665	-0.04096119375267	Mon Dec 6 02:44:29 2021
0.366904459905714	s31	50	ridge_mdtb1002_025_alpha_4	glm7	sc1	sc2	sess	True	True	mdtb1002_025	cerebellum_suit	crossed	all	True	0.1	0.164772757186931	-0.06592876631897	0.113204759286153	-0.773590481427694	0.553800693520943	0.107601387041886	Mon Dec 6 02:44:29 2021
0.30781936807146	s02	14	ridge_mdtb1002_007_alpha_2	glm7	sc1	sc2	sess	True	True	mdtb1002_007	cerebellum_suit	crossed	all	True	0.1	0.273690875105624	-0.018937311875299	0.250541465626943	-0.498917068746113	0.734987964838141	0.469975929676282	Mon Dec 6 02:44:28 2021
0.312050020131669	s03	14	ridge_mdtb1002_007_alpha_2	glm7	sc1	sc2	sess	True	True	mdtb1002_007	cerebellum_suit	crossed	all	True	0.1	0.311628540531456	0.034092667556107	0.269163903291232	-0.461672193417536	0.805736917829612	0.611473835659224	Mon Dec 6 02:44:28 2021
0.339445444983915	s04	14	ridge_mdtb1002_007_alpha_2	glm7	sc1	sc2	sess	True	True	mdtb1002_007	cerebellum_suit	crossed	all	True	0.1	0.104583161215031	-0.108709892051258	0.129791907993994	-0.740416184012013	0.719707607181412	0.439415214362823	Mon Dec 6 02:44:28 2021
0.331421690536984	s06	14	ridge_mdtb1002_007_alpha_2	glm7	sc1	sc2	sess	True	True	mdtb1002_007	cerebellum_suit	crossed	all	True	0.1	0.318899388925875	-0.006281975056317	0.438928642287505	-0.12214271542499	0.853392461187638	0.706784922375275	Mon Dec 6 02:44:28 2021
0.340879795004087	s08	14	ridge_mdtb1002_007_alpha_2	glm7	sc1	sc2	sess	True	True	mdtb1002_007	cerebellum_suit	crossed	all	True	0.1	0.254799053776408	0.000252313179231	0.216358495364167	-0.567283009271665	0.657478426768588	0.314956853537176	Mon Dec 6 02:44:28 2021
0.346640768683055	s09	14	ridge_mdtb1002_007_alpha_2	glm7	sc1	sc2	sess	True	True	mdtb1002_007	cerebellum_suit	crossed	all	True	0.1	0.356931855916113	0.107719630332926	0.372356589815305	-0.255286820369391	0.819967764223531	0.639935528447062	Mon Dec 6 02:44:28 2021
0.309500578209144	s10	14	ridge_mdtb1002_007_alpha_2	glm7	sc1	sc2	sess	True	True	mdtb1002_007	cerebellum_suit	crossed	all	True	0.1	0.379314808456359	0.093617801410765	0.299251181934321	-0.401497636131359	0.902766125230543	0.805532250461087	Mon Dec 6 02:44:28 2021
0.369550112948274	s12	14	ridge_mdtb1002_007_alpha_2	glm7	sc1	sc2	sess	True	True	mdtb1002_007	cerebellum_suit	crossed	all	True	0.1	0.297237570919529	-0.00639832266051	0.24555591625875	-0.5088881674825	0.84747426628861	0.69494853257722	Mon Dec 6 02:44:28 2021
0.324221879488016	s14	14	ridge_mdtb1002_007_alpha_2	glm7	sc1	sc2	sess	True	True	mdtb1002_007	cerebellum_suit	crossed	all	True	0.1	0.154452232793254	-0.05331204208224	0.333939338007503	-0.332121323984993	0.850248553793693	0.700497107587386	Mon Dec 6 02:44:28 2021
0.362831380821187	s15	14	ridge_mdtb1002_007_alpha_2	glm7	sc1	sc2	sess	True	True	mdtb1002_007	cerebellum_suit	crossed	all	True	0.1	0.197811490698147	-0.079164747125531	0.281911854547391	-0.436176290905218	0.837594532765133	0.675189065530265	Mon Dec 6 02:44:28 2021
0.393070087053369	s17	14	ridge_mdtb1002_007_alpha_2	glm7	sc1	sc2	sess	True	True	mdtb1002_007	cerebellum_suit	crossed	all	True	0.1	0.37760984121588	0.084860902044097	0.403711442324702	-0.192577115350598	0.862782378199911	0.725564756399822	Mon Dec 6 02:44:28 2021
0.299514829086951	s18	14	ridge_mdtb1002_007_alpha_2	glm7	sc1	sc2	sess	True	True	mdtb1002_007	cerebellum_suit	crossed	all	True	0.1	0.194766349096154	-0.08499615145794	0.215557982278809	-0.568884035442381	0.784192344945968	0.568384689891936	Mon Dec 6 02:44:28 2021
0.284875074203925	s19	14	ridge_mdtb1002_007_alpha_2	glm7	sc1	sc2	sess	True	True	mdtb1002_007	cerebellum_suit	crossed	all	True	0.1	0.246585730052204	0.010799305717222	0.254240109492353	-0.491519781015295	0.746397044166951	0.492794088333901	Mon Dec 6 02:44:28 2021
0.346879221934618	s20	14	ridge_mdtb1002_007_alpha_2	glm7	sc1	sc2	sess	True	True	mdtb1002_007	cerebellum_suit	crossed	all	True	0.1	0.290972333746107	0.042944440850016	0.325037423570484	-0.349925152859032	0.612378174346945	0.224756348693891	Mon Dec 6 02:44:28 2021
0.355052008572735	s21	14	ridge_mdtb1002_007_alpha_2	glm7	sc1	sc2	sess	True	True	mdtb1002_007	cerebellum_suit	crossed	all	True	0.1	0.07696732999227	-0.204649951339964	0.195871779559683	-0.608256440880633	0.489872726440457	-0.020254547119087	Mon Dec 6 02:44:28 2021
0.345935358917316	s22	14	ridge_mdtb1002_007_alpha_2	glm7	sc1	sc2	sess	True	True	mdtb1002_007	cerebellum_suit	crossed	all	True	0.1	0.422949999331973	0.137894927618962	0.445329703945649	-0.109340592108703	0.792842694923874	0.585685389847749	Mon Dec 6 02:44:28 2021
0.374045376029267	s24	14	ridge_mdtb1002_007_alpha_2	glm7	sc1	sc2	sess	True	True	mdtb1002_007	cerebellum_suit	crossed	all	True	0.1	0.188722812213371	-0.057137463932232	0.206192914360851	-0.587614171278299	0.735108078034824	0.470216156069648	Mon Dec 6 02:44:28 2021
0.338582477868969	s25	14	ridge_mdtb1002_007_alpha_2	glm7	sc1	sc2	sess	True	True	mdtb1002_007	cerebellum_suit	crossed	all	True	0.1	0.22480431739679	-0.082617982026829	0.280142802216838	-0.439714395566324	0.733251321657797	0.466502643315594	Mon Dec 6 02:44:28 2021
0.33148684857401	s26	14	ridge_mdtb1002_007_alpha_2	glm7	sc1	sc2	sess	True	True	mdtb1002_007	cerebellum_suit	crossed	all	True	0.1	0.237227556206236	-0.050150509125631	0.379621975955543	-0.240756048088914	0.656889806911724	0.313779613823449	Mon Dec 6 02:44:28 2021
0.342102412671667	s27	14	ridge_mdtb1002_007_alpha_2	glm7	sc1	sc2	sess	True	True	mdtb1002_007	cerebellum_suit	crossed	all	True	0.1	0.296361428183436	0.045007579654362	0.361738248230639	-0.276523503538723	0.763718521938016	0.527437043876033	Mon Dec 6 02:44:28 2021
0.34081878102638	s28	14	ridge_mdtb1002_007_alpha_2	glm7	sc1	sc2	sess	True	True	mdtb1002_007	cerebellum_suit	crossed	all	True	0.1	0.192468129524493	-0.004961281837284	0.187533468804654	-0.624933062390691	0.755454173685865	0.51090834737173	Mon Dec 6 02:44:28 2021
0.467090529820493	s29	14	ridge_mdtb1002_007_alpha_2	glm7	sc1	sc2	sess	True	True	mdtb1002_007	cerebellum_suit	crossed	all	True	0.1	0.165645533553732	-0.084192241764226	0.208071450849161	-0.583857098301678	0.690639777925244	0.381279555850489	Mon Dec 6 02:44:28 2021
0.427063218250895	s30	14	ridge_mdtb1002_007_alpha_2	glm7	sc1	sc2	sess	True	True	mdtb1002_007	cerebellum_suit	crossed	all	True	0.1	0.124196413157536	-0.116880315098392	0.070360485085245	-0.859279029829511	0.671683550903826	0.343367101807651	Mon Dec 6 02:44:28 2021
0.37228457606266	s31	14	ridge_mdtb1002_007_alpha_2	glm7	sc1	sc2	sess	True	True	mdtb1002_007	cerebellum_suit	crossed	all	True	0.1	0.157532079807317	-0.100458070484707	0.113204759286153	-0.773590481427694	0.555008247782799	0.110016495565598	Mon Dec 6 02:44:28 2021
0.297127078230204	s02	333	ridge_gordon_alpha_6	glm7	sc1	sc2	sess	True	True	gordon	cerebellum_suit	crossed	all	True	0.1	0.291418557568946	0.059745670272245	0.250541465626943	-0.498917068746113	0.671802037061419	0.343604074122839	Mon Dec 6 02:44:27 2021
0.304404456167133	s03	333	ridge_gordon_alpha_6	glm7	sc1	sc2	sess	True	True	gordon	cerebellum_suit	crossed	all	True	0.1	0.334499805601691	0.085109086344223	0.269163903291232	-0.461672193417536	0.770248115189077	0.540496230378154	Mon Dec 6 02:44:27 2021
0.32892032058583	s04	333	ridge_gordon_alpha_6	glm7	sc1	sc2	sess	True	True	gordon	cerebellum_suit	crossed	all	True	0.1	0.120859355629447	-0.040177506584675	0.129791907993994	-0.740416184012013	0.618621685970461	0.237243371940921	Mon Dec 6 02:44:27 2021
0.309289234139688	s06	333	ridge_gordon_alpha_6	glm7	sc1	sc2	sess	True	True	gordon	cerebellum_suit	crossed	all	True	0.1	0.376761111475183	0.12841126988639	0.438928642287505	-0.12214271542499	0.836400777566901	0.672801555133803	Mon Dec 6 02:44:27 2021
0.336933271121337	s08	333	ridge_gordon_alpha_6	glm7	sc1	sc2	sess	True	True	gordon	cerebellum_suit	crossed	all	True	0.1	0.256872069598361	0.023420443194281	0.216358495364167	-0.567283009271665	0.65436589554009	0.308731791080179	Mon Dec 6 02:44:27 2021
0.342826155170147	s09	333	ridge_gordon_alpha_6	glm7	sc1	sc2	sess	True	True	gordon	cerebellum_suit	crossed	all	True	0.1	0.365636034313201	0.125139134301538	0.372356589815305	-0.255286820369391	0.767492462868607	0.534984925737215	Mon Dec 6 02:44:27 2021
0.304527515001177	s10	333	ridge_gordon_alpha_6	glm7	sc1	sc2	sess	True	True	gordon	cerebellum_suit	crossed	all	True	0.1	0.368183444842361	0.118230324938362	0.299251181934321	-0.401497636131359	0.830293320573019	0.660586641146038	Mon Dec 6 02:44:27 2021
0.359250549242631	s12	333	ridge_gordon_alpha_6	glm7	sc1	sc2	sess	True	True	gordon	cerebellum_suit	crossed	all	True	0.1	0.314407536238581	0.048975010043052	0.24555591625875	-0.5088881674825	0.811115980925574	0.622231961851147	Mon Dec 6 02:44:27 2021
0.315105306889003	s14	333	ridge_gordon_alpha_6	glm7	sc1	sc2	sess	True	True	gordon	cerebellum_suit	crossed	all	True	0.1	0.160767114013393	-0.004775001778357	0.333939338007503	-0.332121323984993	0.829598024704146	0.659196049408291	Mon Dec 6 02:44:27 2021
0.349901564042493	s15	333	ridge_gordon_alpha_6	glm7	sc1	sc2	sess	True	True	gordon	cerebellum_suit	crossed	all	True	0.1	0.223329977262663	-0.005410447690632	0.281911854547391	-0.436176290905218	0.806062436767425	0.612124873534849	Mon Dec 6 02:44:27 2021
0.374221302842449	s17	333	ridge_gordon_alpha_6	glm7	sc1	sc2	sess	True	True	gordon	cerebellum_suit	crossed	all	True	0.1	0.413904099083626	0.162331341644167	0.403711442324702	-0.192577115350598	0.800396894631481	0.600793789262962	Mon Dec 6 02:44:27 2021
0.292193326584904	s18	333	ridge_gordon_alpha_6	glm7	sc1	sc2	sess	True	True	gordon	cerebellum_suit	crossed	all	True	0.1	0.195765352525012	-0.028529232312966	0.215557982278809	-0.568884035442381	0.686116881403129	0.372233762806258	Mon Dec 6 02:44:27 2021
0.278633069358846	s19	333	ridge_gordon_alpha_6	glm7	sc1	sc2	sess	True	True	gordon	cerebellum_suit	crossed	all	True	0.1	0.274242235090317	0.056779077592881	0.254240109492353	-0.491519781015295	0.718071618634545	0.436143237269089	Mon Dec 6 02:44:27 2021
0.340431835483865	s20	333	ridge_gordon_alpha_6	glm7	sc1	sc2	sess	True	True	gordon	cerebellum_suit	crossed	all	True	0.1	0.325294760804375	0.082532491582323	0.325037423570484	-0.349925152859032	0.562949282186455	0.12589856437291	Mon Dec 6 02:44:27 2021
0.339480432979882	s21	333	ridge_gordon_alpha_6	glm7	sc1	sc2	sess	True	True	gordon	cerebellum_suit	crossed	all	True	0.1	0.121935078724587	-0.084970964587396	0.195871779559683	-0.608256440880633	0.472237656332691	-0.055524687334617	Mon Dec 6 02:44:27 2021
0.33743952391725	s22	333	ridge_gordon_alpha_6	glm7	sc1	sc2	sess	True	True	gordon	cerebellum_suit	crossed	all	True	0.1	0.435672042001747	0.174143471199877	0.445329703945649	-0.109340592108703	0.777094242433533	0.554188484867065	Mon Dec 6 02:44:27 2021
0.368065046274144	s24	333	ridge_gordon_alpha_6	glm7	sc1	sc2	sess	True	True	gordon	cerebellum_suit	crossed	all	True	0.1	0.189251788791135	-0.023744511701422	0.206192914360851	-0.587614171278299	0.635863917935322	0.271727835870643	Mon Dec 6 02:44:27 2021
0.322823697618352	s25	333	ridge_gordon_alpha_6	glm7	sc1	sc2	sess	True	True	gordon	cerebellum_suit	crossed	all	True	0.1	0.272288692812645	0.019757851394099	0.280142802216838	-0.439714395566324	0.657187771416387	0.314375542832774	Mon Dec 6 02:44:27 2021
0.314490238037605	s26	333	ridge_gordon_alpha_6	glm7	sc1	sc2	sess	True	True	gordon	cerebellum_suit	crossed	all	True	0.1	0.304266357179487	0.05822727362748	0.379621975955543	-0.240756048088914	0.651158073204909	0.302316146409819	Mon Dec 6 02:44:27 2021
0.337059397633299	s27	333	ridge_gordon_alpha_6	glm7	sc1	sc2	sess	True	True	gordon	cerebellum_suit	crossed	all	True	0.1	0.31179064340629	0.067286037722607	0.361738248230639	-0.276523503538723	0.791345086420339	0.582690172840678	Mon Dec 6 02:44:27 2021
0.338088919237434	s28	333	ridge_gordon_alpha_6	glm7	sc1	sc2	sess	True	True	gordon	cerebellum_suit	crossed	all	True	0.1	0.204075477395684	0.008655520963568	0.187533468804654	-0.624933062390691	0.622231130454628	0.244462260909256	Mon Dec 6 02:44:27 2021
0.447327060202662	s29	333	ridge_gordon_alpha_6	glm7	sc1	sc2	sess	True	True	gordon	cerebellum_suit	crossed	all	True	0.1	0.242500210522826	0.006948145510327	0.208071450849161	-0.583857098301678	0.65046402285946	0.30092804571892	Mon Dec 6 02:44:27 2021
0.422767381063063	s30	333	ridge_gordon_alpha_6	glm7	sc1	sc2	sess	True	True	gordon	cerebellum_suit	crossed	all	True	0.1	0.129347630592122	-0.093627778334932	0.070360485085245	-0.859279029829511	0.46944936084806	-0.06110127830388	Mon Dec 6 02:44:27 2021
0.365005064675568	s31	333	ridge_gordon_alpha_6	glm7	sc1	sc2	sess	True	True	gordon	cerebellum_suit	crossed	all	True	0.1	0.164672358576628	-0.057905616282759	0.113204759286153	-0.773590481427694	0.488899511265969	-0.022200977468062	Mon Dec 6 02:44:27 2021
0.296278729528913	s02	210	ridge_fan_alpha_6	glm7	sc1	sc2	sess	True	True	fan	cerebellum_suit	crossed	all	True	0.1	0.285621420972298	0.063675464952253	0.250541465626943	-0.498917068746113	0.665934600598309	0.331869201196618	Mon Dec 6 02:44:26 2021
0.302994231539339	s03	210	ridge_fan_alpha_6	glm7	sc1	sc2	sess	True	True	fan	cerebellum_suit	crossed	all	True	0.1	0.328733452060544	0.091867095504646	0.269163903291232	-0.461672193417536	0.740000623109346	0.480001246218692	Mon Dec 6 02:44:26 2021
0.324979827509312	s04	210	ridge_fan_alpha_6	glm7	sc1	sc2	sess	True	True	fan	cerebellum_suit	crossed	all	True	0.1	0.130628815840952	-0.01563037509459	0.129791907993994	-0.740416184012013	0.627868221644105	0.255736443288211	Mon Dec 6 02:44:26 2021
0.303122200962331	s06	210	ridge_fan_alpha_6	glm7	sc1	sc2	sess	True	True	fan	cerebellum_suit	crossed	all	True	0.1	0.40760163959452	0.165079899400566	0.438928642287505	-0.12214271542499	0.826418346012262	0.652836692024524	Mon Dec 6 02:44:26 2021
0.333327072978444	s08	210	ridge_fan_alpha_6	glm7	sc1	sc2	sess	True	True	fan	cerebellum_suit	crossed	all	True	0.1	0.259503627766148	0.042481123592503	0.216358495364167	-0.567283009271665	0.651181334765316	0.302362669530633	Mon Dec 6 02:44:26 2021
0.341001176806943	s09	210	ridge_fan_alpha_6	glm7	sc1	sc2	sess	True	True	fan	cerebellum_suit	crossed	all	True	0.1	0.359034970738997	0.128198376685359	0.372356589815305	-0.255286820369391	0.754395612344356	0.508791224688713	Mon Dec 6 02:44:26 2021
0.300980418051405	s10	210	ridge_fan_alpha_6	glm7	sc1	sc2	sess	True	True	fan	cerebellum_suit	crossed	all	True	0.1	0.37785480655944	0.138609242648577	0.299251181934321	-0.401497636131359	0.848743190236681	0.697486380473362	Mon Dec 6 02:44:26 2021
0.35454491825075	s12	210	ridge_fan_alpha_6	glm7	sc1	sc2	sess	True	True	fan	cerebellum_suit	crossed	all	True	0.1	0.314983186127118	0.07401050750098	0.24555591625875	-0.5088881674825	0.794871949292105	0.58974389858421	Mon Dec 6 02:44:26 2021
0.313117238042983	s14	210	ridge_fan_alpha_6	glm7	sc1	sc2	sess	True	True	fan	cerebellum_suit	crossed	all	True	0.1	0.162900036914167	0.00519297047757	0.333939338007503	-0.332121323984993	0.835253381018926	0.670506762037851	Mon Dec 6 02:44:26 2021
0.345394502430782	s15	210	ridge_fan_alpha_6	glm7	sc1	sc2	sess	True	True	fan	cerebellum_suit	crossed	all	True	0.1	0.231046584396664	0.020558132637532	0.281911854547391	-0.436176290905218	0.816721195598073	0.633442391196147	Mon Dec 6 02:44:26 2021
0.371830149298401	s17	210	ridge_fan_alpha_6	glm7	sc1	sc2	sess	True	True	fan	cerebellum_suit	crossed	all	True	0.1	0.41684118594759	0.170258869253631	0.403711442324702	-0.192577115350598	0.791121466186062	0.582242932372125	Mon Dec 6 02:44:26 2021
0.288176930973231	s18	210	ridge_fan_alpha_6	glm7	sc1	sc2	sess	True	True	fan	cerebellum_suit	crossed	all	True	0.1	0.197302729140002	-0.000376751523084	0.215557982278809	-0.568884035442381	0.702240657671566	0.404481315343133	Mon Dec 6 02:44:26 2021
0.277734592259424	s19	210	ridge_fan_alpha_6	glm7	sc1	sc2	sess	True	True	fan	cerebellum_suit	crossed	all	True	0.1	0.265042224503567	0.061006494014737	0.254240109492353	-0.491519781015295	0.693813710672077	0.387627421344153	Mon Dec 6 02:44:26 2021
0.338767678775995	s20	210	ridge_fan_alpha_6	glm7	sc1	sc2	sess	True	True	fan	cerebellum_suit	crossed	all	True	0.1	0.315875721778663	0.087495436384088	0.325037423570484	-0.349925152859032	0.558682742771164	0.117365485542328	Mon Dec 6 02:44:26 2021
0.333439055580968	s21	210	ridge_fan_alpha_6	glm7	sc1	sc2	sess	True	True	fan	cerebellum_suit	crossed	all	True	0.1	0.126888085097415	-0.048979951384473	0.195871779559683	-0.608256440880633	0.448888309538274	-0.102223380923453	Mon Dec 6 02:44:26 2021
0.333129804071026	s22	210	ridge_fan_alpha_6	glm7	sc1	sc2	sess	True	True	fan	cerebellum_suit	crossed	all	True	0.1	0.443696240166104	0.191678899422684	0.445329703945649	-0.109340592108703	0.77919107012591	0.558382140251821	Mon Dec 6 02:44:26 2021
0.363333598069925	s24	210	ridge_fan_alpha_6	glm7	sc1	sc2	sess	True	True	fan	cerebellum_suit	crossed	all	True	0.1	0.195652308027487	0.003262521293116	0.206192914360851	-0.587614171278299	0.618355551258209	0.236711102516418	Mon Dec 6 02:44:26 2021
0.317999120249762	s25	210	ridge_fan_alpha_6	glm7	sc1	sc2	sess	True	True	fan	cerebellum_suit	crossed	all	True	0.1	0.278755962943553	0.047475872550897	0.280142802216838	-0.439714395566324	0.663701008400539	0.327402016801079	Mon Dec 6 02:44:26 2021
0.310155788596008	s26	210	ridge_fan_alpha_6	glm7	sc1	sc2	sess	True	True	fan	cerebellum_suit	crossed	all	True	0.1	0.311430511459675	0.083075941805315	0.379621975955543	-0.240756048088914	0.676630463042728	0.353260926085457	Mon Dec 6 02:44:26 2021
0.334084102907	s27	210	ridge_fan_alpha_6	glm7	sc1	sc2	sess	True	True	fan	cerebellum_suit	crossed	all	True	0.1	0.314466297688355	0.087465016163842	0.361738248230639	-0.276523503538723	0.736812685217525	0.47362537043505	Mon Dec 6 02:44:26 2021
0.334416327642555	s28	210	ridge_fan_alpha_6	glm7	sc1	sc2	sess	True	True	fan	cerebellum_suit	crossed	all	True	0.1	0.211197172911388	0.028789612084206	0.187533468804654	-0.624933062390691	0.64372771582003	0.28745543164006	Mon Dec 6 02:44:26 2021
0.441749400703467	s29	210	ridge_fan_alpha_6	glm7	sc1	sc2	sess	True	True	fan	cerebellum_suit	crossed	all	True	0.1	0.237082581577555	0.032752872142922	0.208071450849161	-0.583857098301678	0.634363989574609	0.268727979149219	Mon Dec 6 02:44:26 2021
0.416560502126748	s30	210	ridge_fan_alpha_6	glm7	sc1	sc2	sess	True	True	fan	cerebellum_suit	crossed	all	True	0.1	0.126159132911487	-0.064123568016996	0.070360485085245	-0.859279029829511	0.484185811401485	-0.031628377197031	Mon Dec 6 02:44:26 2021
0.35989148916147	s31	210	ridge_fan_alpha_6	glm7	sc1	sc2	sess	True	True	fan	cerebellum_suit	crossed	all	True	0.1	0.163424013484211	-0.02868022396589	0.113204759286153	-0.773590481427694	0.482260978602898	-0.035478042794204	Mon Dec 6 02:44:26 2021
0.300271871623996	s02	50	ridge_arslan_50_alpha_4	glm7	sc1	sc2	sess	True	True	arslan_50	cerebellum_suit	crossed	all	True	0.1	0.281321167448281	0.03552361465971	0.250541465626943	-0.498917068746113	0.673977779306019	0.347955558612037	Thu Oct 28 13:05:44 2021
0.307438427641803	s03	50	ridge_arslan_50_alpha_4	glm7	sc1	sc2	sess	True	True	arslan_50	cerebellum_suit	crossed	all	True	0.1	0.316159697958251	0.062793538483717	0.269163903291232	-0.461672193417536	0.745980674678084	0.491961349356167	Thu Oct 28 13:05:44 2021
0.331548459046868	s04	50	ridge_arslan_50_alpha_4	glm7	sc1	sc2	sess	True	True	arslan_50	cerebellum_suit	crossed	all	True	0.1	0.122408509343482	-0.053437794742313	0.129791907993994	-0.740416184012013	0.631247617589296	0.262495235178592	Mon Dec 6 02:44:25 2021
0.310659106923279	s06	50	ridge_arslan_50_alpha_4	glm7	sc1	sc2	sess	True	True	arslan_50	cerebellum_suit	crossed	all	True	0.1	0.385706548198606	0.12604009050988	0.438928642287505	-0.12214271542499	0.818368096393771	0.636736192787542	Mon Dec 6 02:44:25 2021
0.338920908236078	s08	50	ridge_arslan_50_alpha_4	glm7	sc1	sc2	sess	True	True	arslan_50	cerebellum_suit	crossed	all	True	0.1	0.246599329436977	0.011524993221838	0.216358495364167	-0.567283009271665	0.692662251297499	0.385324502594998	Mon Dec 6 02:44:25 2021
0.341412547462949	s09	50	ridge_arslan_50_alpha_4	glm7	sc1	sc2	sess	True	True	arslan_50	cerebellum_suit	crossed	all	True	0.1	0.368620641825699	0.130655428884143	0.372356589815305	-0.255286820369391	0.801629625569771	0.603259251139543	Thu Oct 28 13:05:44 2021
0.30188238553045	s10	50	ridge_arslan_50_alpha_4	glm7	sc1	sc2	sess	True	True	arslan_50	cerebellum_suit	crossed	all	True	0.1	0.384777833298659	0.135212297093482	0.299251181934321	-0.401497636131359	0.85248825735916	0.70497651471832	Thu Oct 28 13:05:44 2021
0.360378080622046	s12	50	ridge_arslan_50_alpha_4	glm7	sc1	sc2	sess	True	True	arslan_50	cerebellum_suit	crossed	all	True	0.1	0.310891856644307	0.042171694687533	0.24555591625875	-0.5088881674825	0.82126689206464	0.64253378412928	Thu Oct 28 13:05:44 2021
0.3188391149526	s14	50	ridge_arslan_50_alpha_4	glm7	sc1	sc2	sess	True	True	arslan_50	cerebellum_suit	crossed	all	True	0.1	0.160730551167524	-0.027333394003177	0.333939338007503	-0.332121323984993	0.822099998693194	0.644199997386388	Mon Dec 6 02:44:25 2021
0.355843881616989	s15	50	ridge_arslan_50_alpha_4	glm7	sc1	sc2	sess	True	True	arslan_50	cerebellum_suit	crossed	all	True	0.1	0.203504433811869	-0.041104916802401	0.281911854547391	-0.436176290905218	0.822784011678729	0.645568023357458	Thu Oct 28 13:05:44 2021
0.374604691792413	s17	50	ridge_arslan_50_alpha_4	glm7	sc1	sc2	sess	True	True	arslan_50	cerebellum_suit	crossed	all	True	0.1	0.418337357637972	0.164029367289275	0.403711442324702	-0.192577115350598	0.815027273576545	0.63005454715309	Thu Oct 28 13:05:44 2021
0.296099877214434	s18	50	ridge_arslan_50_alpha_4	glm7	sc1	sc2	sess	True	True	arslan_50	cerebellum_suit	crossed	all	True	0.1	0.181230530369232	-0.057593644419722	0.215557982278809	-0.568884035442381	0.707079550932312	0.414159101864623	Thu Oct 28 13:05:44 2021
0.27962867478194	s19	50	ridge_arslan_50_alpha_4	glm7	sc1	sc2	sess	True	True	arslan_50	cerebellum_suit	crossed	all	True	0.1	0.265385719715593	0.048614682974832	0.254240109492353	-0.491519781015295	0.730744968288546	0.461489936577091	Thu Oct 28 13:05:44 2021
0.341869397302713	s20	50	ridge_arslan_50_alpha_4	glm7	sc1	sc2	sess	True	True	arslan_50	cerebellum_suit	crossed	all	True	0.1	0.31387484866109	0.075288445138618	0.325037423570484	-0.349925152859032	0.578339315313554	0.156678630627109	Thu Oct 28 13:05:44 2021
0.343710969567352	s21	50	ridge_arslan_50_alpha_4	glm7	sc1	sc2	sess	True	True	arslan_50	cerebellum_suit	crossed	all	True	0.1	0.077724096756786	-0.116325987631722	0.195871779559683	-0.608256440880633	0.496710297323375	-0.00657940535325	Mon Dec 6 02:44:25 2021
0.337904273623802	s22	50	ridge_arslan_50_alpha_4	glm7	sc1	sc2	sess	True	True	arslan_50	cerebellum_suit	crossed	all	True	0.1	0.435580528312361	0.173736033585452	0.445329703945649	-0.109340592108703	0.786738199796823	0.573476399593645	Mon Dec 6 02:44:25 2021
0.368309891547799	s24	50	ridge_arslan_50_alpha_4	glm7	sc1	sc2	sess	True	True	arslan_50	cerebellum_suit	crossed	all	True	0.1	0.183092513834729	-0.02331776768387	0.206192914360851	-0.587614171278299	0.643833309746199	0.287666619492398	Thu Oct 28 13:05:44 2021
0.325553982858917	s25	50	ridge_arslan_50_alpha_4	glm7	sc1	sc2	sess	True	True	arslan_50	cerebellum_suit	crossed	all	True	0.1	0.269867778284501	0.0025187982579	0.280142802216838	-0.439714395566324	0.680105529587627	0.360211059175254	Thu Oct 28 13:05:44 2021
0.316475759927712	s26	50	ridge_arslan_50_alpha_4	glm7	sc1	sc2	sess	True	True	arslan_50	cerebellum_suit	crossed	all	True	0.1	0.293312373142152	0.045770141424355	0.379621975955543	-0.240756048088914	0.681135944470134	0.362271888940269	Mon Dec 6 02:44:25 2021
0.341469749588488	s27	50	ridge_arslan_50_alpha_4	glm7	sc1	sc2	sess	True	True	arslan_50	cerebellum_suit	crossed	all	True	0.1	0.289689666433183	0.046000533746761	0.361738248230639	-0.276523503538723	0.756414360495947	0.512828720991893	Thu Oct 28 13:05:44 2021
0.3367947953201	s28	50	ridge_arslan_50_alpha_4	glm7	sc1	sc2	sess	True	True	arslan_50	cerebellum_suit	crossed	all	True	0.1	0.20097978505531	0.01679676293713	0.187533468804654	-0.624933062390691	0.667454412079802	0.334908824159603	Thu Oct 28 13:05:44 2021
0.45544062742728	s29	50	ridge_arslan_50_alpha_4	glm7	sc1	sc2	sess	True	True	arslan_50	cerebellum_suit	crossed	all	True	0.1	0.19953849426964	-0.030871517705399	0.208071450849161	-0.583857098301678	0.608233136864176	0.216466273728351	Thu Oct 28 13:05:44 2021
0.423638285001347	s30	50	ridge_arslan_50_alpha_4	glm7	sc1	sc2	sess	True	True	arslan_50	cerebellum_suit	crossed	all	True	0.1	0.127454168309669	-0.098001020855138	0.070360485085245	-0.859279029829511	0.494621164923856	-0.010757670152288	Thu Oct 28 13:05:44 2021
0.36781023826941	s31	50	ridge_arslan_50_alpha_4	glm7	sc1	sc2	sess	True	True	arslan_50	cerebellum_suit	crossed	all	True	0.1	0.151464958647065	-0.075816789661996	0.113204759286153	-0.773590481427694	0.453721319047973	-0.092557361904053	Thu Oct 28 13:05:44 2021
0.296645551843824	s02	250	ridge_arslan_250_alpha_6	glm7	sc1	sc2	sess	True	True	arslan_250	cerebellum_suit	crossed	all	True	0.1	0.289780506039834	0.061376080471921	0.250541465626943	-0.498917068746113	0.700609698200404	0.401219396400808	Thu Oct 28 12:52:10 2021
0.302997032706739	s03	250	ridge_arslan_250_alpha_6	glm7	sc1	sc2	sess	True	True	arslan_250	cerebellum_suit	crossed	all	True	0.1	0.33616714456692	0.091684178854081	0.269163903291232	-0.461672193417536	0.796476168301453	0.592952336602906	Thu Oct 28 12:52:10 2021
0.32793231310509	s04	250	ridge_arslan_250_alpha_6	glm7	sc1	sc2	sess	True	True	arslan_250	cerebellum_suit	crossed	all	True	0.1	0.125380554887979	-0.033751215944255	0.129791907993994	-0.740416184012013	0.645264509710483	0.290529019420966	Mon Dec 6 02:44:24 2021
0.308435596046017	s06	250	ridge_arslan_250_alpha_6	glm7	sc1	sc2	sess	True	True	arslan_250	cerebellum_suit	crossed	all	True	0.1	0.386864440082224	0.134853725611353	0.438928642287505	-0.12214271542499	0.822290851376521	0.644581702753042	Mon Dec 6 02:44:24 2021
0.333252649095663	s08	250	ridge_arslan_250_alpha_6	glm7	sc1	sc2	sess	True	True	arslan_250	cerebellum_suit	crossed	all	True	0.1	0.263043375296349	0.043286652889369	0.216358495364167	-0.567283009271665	0.702309352103016	0.404618704206032	Mon Dec 6 02:44:24 2021
0.34050971262246	s09	250	ridge_arslan_250_alpha_6	glm7	sc1	sc2	sess	True	True	arslan_250	cerebellum_suit	crossed	all	True	0.1	0.36810384046479	0.133162963633716	0.372356589815305	-0.255286820369391	0.771209040147842	0.542418080295684	Thu Oct 28 12:52:10 2021
0.30150137498212	s10	250	ridge_arslan_250_alpha_6	glm7	sc1	sc2	sess	True	True	arslan_250	cerebellum_suit	crossed	all	True	0.1	0.380800561894686	0.135915754310753	0.299251181934321	-0.401497636131359	0.844266021290418	0.688532042580836	Thu Oct 28 12:52:10 2021
0.355878003024784	s12	250	ridge_arslan_250_alpha_6	glm7	sc1	sc2	sess	True	True	arslan_250	cerebellum_suit	crossed	all	True	0.1	0.319438704206456	0.066094506405387	0.24555591625875	-0.5088881674825	0.835713983925506	0.671427967851013	Thu Oct 28 12:52:10 2021
0.314971566754603	s14	250	ridge_arslan_250_alpha_6	glm7	sc1	sc2	sess	True	True	arslan_250	cerebellum_suit	crossed	all	True	0.1	0.160523409738116	-0.005099853480773	0.333939338007503	-0.332121323984993	0.844043049855904	0.688086099711808	Mon Dec 6 02:44:24 2021
0.348048261143028	s15	250	ridge_arslan_250_alpha_6	glm7	sc1	sc2	sess	True	True	arslan_250	cerebellum_suit	crossed	all	True	0.1	0.222724577122742	0.00398959882258	0.281911854547391	-0.436176290905218	0.827093461105968	0.654186922211936	Thu Oct 28 12:52:10 2021
0.370680356263372	s17	250	ridge_arslan_250_alpha_6	glm7	sc1	sc2	sess	True	True	arslan_250	cerebellum_suit	crossed	all	True	0.1	0.427191606174936	0.178921988030802	0.403711442324702	-0.192577115350598	0.808204545564162	0.616409091128324	Thu Oct 28 12:52:10 2021
0.291721258594609	s18	250	ridge_arslan_250_alpha_6	glm7	sc1	sc2	sess	True	True	arslan_250	cerebellum_suit	crossed	all	True	0.1	0.191556956363199	-0.025834318850298	0.215557982278809	-0.568884035442381	0.730597308494874	0.461194616989748	Thu Oct 28 12:52:10 2021
0.277898211650744	s19	250	ridge_arslan_250_alpha_6	glm7	sc1	sc2	sess	True	True	arslan_250	cerebellum_suit	crossed	all	True	0.1	0.274113788726271	0.061459484556149	0.254240109492353	-0.491519781015295	0.719810104725683	0.439620209451365	Thu Oct 28 12:52:10 2021
0.340396268489938	s20	250	ridge_arslan_250_alpha_6	glm7	sc1	sc2	sess	True	True	arslan_250	cerebellum_suit	crossed	all	True	0.1	0.317215701594482	0.08219968617201	0.325037423570484	-0.349925152859032	0.569013185086958	0.138026370173916	Thu Oct 28 12:52:10 2021
0.334879286628469	s21	250	ridge_arslan_250_alpha_6	glm7	sc1	sc2	sess	True	True	arslan_250	cerebellum_suit	crossed	all	True	0.1	0.128296945837735	-0.056536587995929	0.195871779559683	-0.608256440880633	0.506799611561795	0.01359922312359	Mon Dec 6 02:44:24 2021
0.334607674376382	s22	250	ridge_arslan_250_alpha_6	glm7	sc1	sc2	sess	True	True	arslan_250	cerebellum_suit	crossed	all	True	0.1	0.441044555691718	0.185440018574262	0.445329703945649	-0.109340592108703	0.784163139917675	0.56832627983535	Mon Dec 6 02:44:24 2021
0.363974071800736	s24	250	ridge_arslan_250_alpha_6	glm7	sc1	sc2	sess	True	True	arslan_250	cerebellum_suit	crossed	all	True	0.1	0.203335809580889	0.000228797956191	0.206192914360851	-0.587614171278299	0.665212932185905	0.330425864371809	Thu Oct 28 12:52:10 2021
0.32174685680611	s25	250	ridge_arslan_250_alpha_6	glm7	sc1	sc2	sess	True	True	arslan_250	cerebellum_suit	crossed	all	True	0.1	0.267553561244593	0.024657172589691	0.280142802216838	-0.439714395566324	0.674929835841106	0.349859671682212	Thu Oct 28 12:52:10 2021
0.309452309607692	s26	250	ridge_arslan_250_alpha_6	glm7	sc1	sc2	sess	True	True	arslan_250	cerebellum_suit	crossed	all	True	0.1	0.329071189413975	0.088943437077271	0.379621975955543	-0.240756048088914	0.694255948481267	0.388511896962533	Mon Dec 6 02:44:24 2021
0.336571538067615	s27	250	ridge_arslan_250_alpha_6	glm7	sc1	sc2	sess	True	True	arslan_250	cerebellum_suit	crossed	all	True	0.1	0.305646172260833	0.072243942372257	0.361738248230639	-0.276523503538723	0.74324653096293	0.48649306192586	Thu Oct 28 12:52:10 2021
0.334199744974372	s28	250	ridge_arslan_250_alpha_6	glm7	sc1	sc2	sess	True	True	arslan_250	cerebellum_suit	crossed	all	True	0.1	0.218464962597665	0.030115407251921	0.187533468804654	-0.624933062390691	0.685507766721301	0.371015533442603	Thu Oct 28 12:52:10 2021
0.444844031653135	s29	250	ridge_arslan_250_alpha_6	glm7	sc1	sc2	sess	True	True	arslan_250	cerebellum_suit	crossed	all	True	0.1	0.234581723663578	0.018531632491895	0.208071450849161	-0.583857098301678	0.633618104188889	0.267236208377777	Thu Oct 28 12:52:10 2021
0.414759741399507	s30	250	ridge_arslan_250_alpha_6	glm7	sc1	sc2	sess	True	True	arslan_250	cerebellum_suit	crossed	all	True	0.1	0.133076930240572	-0.056878871374655	0.070360485085245	-0.859279029829511	0.541403726251401	0.082807452502802	Thu Oct 28 12:52:10 2021
0.362169390724015	s31	250	ridge_arslan_250_alpha_6	glm7	sc1	sc2	sess	True	True	arslan_250	cerebellum_suit	crossed	all	True	0.1	0.167369605984125	-0.04116451391927	0.113204759286153	-0.773590481427694	0.524656715068173	0.049313430136346	Thu Oct 28 12:52:10 2021
0.295993455725378	s02	200	ridge_arslan_200_alpha_6	glm7	sc1	sc2	sess	True	True	arslan_200	cerebellum_suit	crossed	all	True	0.1	0.287971301615768	0.064919602705091	0.250541465626943	-0.498917068746113	0.689984756201354	0.379969512402708	Thu Oct 28 12:38:19 2021
0.30166787959255	s03	200	ridge_arslan_200_alpha_6	glm7	sc1	sc2	sess	True	True	arslan_200	cerebellum_suit	crossed	all	True	0.1	0.337806653899501	0.098661386868072	0.269163903291232	-0.461672193417536	0.794638959888094	0.589277919776187	Thu Oct 28 12:38:19 2021
0.326251688260543	s04	200	ridge_arslan_200_alpha_6	glm7	sc1	sc2	sess	True	True	arslan_200	cerebellum_suit	crossed	all	True	0.1	0.12787974709838	-0.023326514686522	0.129791907993994	-0.740416184012013	0.651481412938043	0.302962825876087	Mon Dec 6 02:33:18 2021
0.305880262146127	s06	200	ridge_arslan_200_alpha_6	glm7	sc1	sc2	sess	True	True	arslan_200	cerebellum_suit	crossed	all	True	0.1	0.394320217571104	0.148848075886603	0.438928642287505	-0.12214271542499	0.825391751759208	0.650783503518415	Mon Dec 6 02:33:18 2021
0.332327820874858	s08	200	ridge_arslan_200_alpha_6	glm7	sc1	sc2	sess	True	True	arslan_200	cerebellum_suit	crossed	all	True	0.1	0.259045549301424	0.047825905253126	0.216358495364167	-0.567283009271665	0.689876700034218	0.379753400068436	Mon Dec 6 02:33:18 2021
0.339961224400637	s09	200	ridge_arslan_200_alpha_6	glm7	sc1	sc2	sess	True	True	arslan_200	cerebellum_suit	crossed	all	True	0.1	0.367043960294519	0.133791249191448	0.372356589815305	-0.255286820369391	0.771557227706555	0.543114455413109	Thu Oct 28 12:38:19 2021
0.300202992269018	s10	200	ridge_arslan_200_alpha_6	glm7	sc1	sc2	sess	True	True	arslan_200	cerebellum_suit	crossed	all	True	0.1	0.384245930224261	0.142892627059056	0.299251181934321	-0.401497636131359	0.848912641083131	0.697825282166262	Thu Oct 28 12:38:19 2021
0.354113330777709	s12	200	ridge_arslan_200_alpha_6	glm7	sc1	sc2	sess	True	True	arslan_200	cerebellum_suit	crossed	all	True	0.1	0.321516223695413	0.075518910042356	0.24555591625875	-0.5088881674825	0.845197916924665	0.690395833849329	Thu Oct 28 12:38:19 2021
0.3138172583323	s14	200	ridge_arslan_200_alpha_6	glm7	sc1	sc2	sess	True	True	arslan_200	cerebellum_suit	crossed	all	True	0.1	0.162329326091188	0.000784804980532	0.333939338007503	-0.332121323984993	0.842712292668629	0.685424585337257	Mon Dec 6 02:33:18 2021
0.345435885290744	s15	200	ridge_arslan_200_alpha_6	glm7	sc1	sc2	sess	True	True	arslan_200	cerebellum_suit	crossed	all	True	0.1	0.2290592665055	0.019160545061392	0.281911854547391	-0.436176290905218	0.837362016093011	0.674724032186023	Thu Oct 28 12:38:19 2021
0.370112587450967	s17	200	ridge_arslan_200_alpha_6	glm7	sc1	sc2	sess	True	True	arslan_200	cerebellum_suit	crossed	all	True	0.1	0.427521326808236	0.18074453077242	0.403711442324702	-0.192577115350598	0.812397150725446	0.624794301450892	Thu Oct 28 12:38:19 2021
0.289501057160864	s18	200	ridge_arslan_200_alpha_6	glm7	sc1	sc2	sess	True	True	arslan_200	cerebellum_suit	crossed	all	True	0.1	0.19634586029194	-0.010535572483648	0.215557982278809	-0.568884035442381	0.733140972762574	0.466281945525148	Thu Oct 28 12:38:19 2021
0.277106800864654	s19	200	ridge_arslan_200_alpha_6	glm7	sc1	sc2	sess	True	True	arslan_200	cerebellum_suit	crossed	all	True	0.1	0.274871447602534	0.066308508322366	0.254240109492353	-0.491519781015295	0.728806053914571	0.457612107829142	Thu Oct 28 12:38:19 2021
0.339613900270191	s20	200	ridge_arslan_200_alpha_6	glm7	sc1	sc2	sess	True	True	arslan_200	cerebellum_suit	crossed	all	True	0.1	0.315490486597788	0.085362144242601	0.325037423570484	-0.349925152859032	0.565829965305013	0.131659930610026	Thu Oct 28 12:38:19 2021
0.333138878921315	s21	200	ridge_arslan_200_alpha_6	glm7	sc1	sc2	sess	True	True	arslan_200	cerebellum_suit	crossed	all	True	0.1	0.124568800815558	-0.046727128430966	0.195871779559683	-0.608256440880633	0.495007631286957	-0.009984737426085	Mon Dec 6 02:33:18 2021
0.332101427953524	s22	200	ridge_arslan_200_alpha_6	glm7	sc1	sc2	sess	True	True	arslan_200	cerebellum_suit	crossed	all	True	0.1	0.446172384282384	0.195695641581636	0.445329703945649	-0.109340592108703	0.786203075734841	0.572406151469682	Mon Dec 6 02:33:18 2021
0.362935122344612	s24	200	ridge_arslan_200_alpha_6	glm7	sc1	sc2	sess	True	True	arslan_200	cerebellum_suit	crossed	all	True	0.1	0.200764071075897	0.005291157511106	0.206192914360851	-0.587614171278299	0.656367186596469	0.312734373192937	Mon Dec 6 02:33:18 2021
0.319727280504202	s25	200	ridge_arslan_200_alpha_6	glm7	sc1	sc2	sess	True	True	arslan_200	cerebellum_suit	crossed	all	True	0.1	0.271144723993064	0.036462075576064	0.280142802216838	-0.439714395566324	0.675313462683075	0.350626925366149	Thu Oct 28 12:38:19 2021
0.308106350199933	s26	200	ridge_arslan_200_alpha_6	glm7	sc1	sc2	sess	True	True	arslan_200	cerebellum_suit	crossed	all	True	0.1	0.331743563783026	0.096513088273263	0.379621975955543	-0.240756048088914	0.702892962588018	0.405785925176037	Mon Dec 6 02:33:18 2021
0.334541755656587	s27	200	ridge_arslan_200_alpha_6	glm7	sc1	sc2	sess	True	True	arslan_200	cerebellum_suit	crossed	all	True	0.1	0.309763856673327	0.083743510625989	0.361738248230639	-0.276523503538723	0.736253492101928	0.472506984203856	Thu Oct 28 12:38:19 2021
0.332770400188461	s28	200	ridge_arslan_200_alpha_6	glm7	sc1	sc2	sess	True	True	arslan_200	cerebellum_suit	crossed	all	True	0.1	0.220672238745727	0.037654917317043	0.187533468804654	-0.624933062390691	0.691771278697861	0.383542557395723	Thu Oct 28 12:38:19 2021
0.443227733166766	s29	200	ridge_arslan_200_alpha_6	glm7	sc1	sc2	sess	True	True	arslan_200	cerebellum_suit	crossed	all	True	0.1	0.231105814249351	0.025125346215905	0.208071450849161	-0.583857098301678	0.630494594218728	0.260989188437456	Thu Oct 28 12:38:19 2021
0.412934012427111	s30	200	ridge_arslan_200_alpha_6	glm7	sc1	sc2	sess	True	True	arslan_200	cerebellum_suit	crossed	all	True	0.1	0.132551660339685	-0.048242912677988	0.070360485085245	-0.859279029829511	0.540544549987766	0.081089099975532	Thu Oct 28 12:38:19 2021
0.359737338821988	s31	200	ridge_arslan_200_alpha_6	glm7	sc1	sc2	sess	True	True	arslan_200	cerebellum_suit	crossed	all	True	0.1	0.168053240757103	-0.028152680644646	0.113204759286153	-0.773590481427694	0.520552715894064	0.041105431788129	Thu Oct 28 12:38:19 2021
0.306691715455021	s02	100	ridge_arslan_100_alpha_4	glm7	sc1	sc2	sess	True	True	arslan_100	cerebellum_suit	crossed	all	True	0.1	0.276141214357146	-0.002500979182487	0.250541465626943	-0.498917068746113	0.66616850308423	0.332337006168459	Thu Oct 28 12:25:24 2021
0.319924876595365	s03	100	ridge_arslan_100_alpha_4	glm7	sc1	sc2	sess	True	True	arslan_100	cerebellum_suit	crossed	all	True	0.1	0.296578616554521	-0.011816458934828	0.269163903291232	-0.461672193417536	0.794942400766442	0.589884801532884	Thu Oct 28 12:25:24 2021
0.342931347030417	s04	100	ridge_arslan_100_alpha_4	glm7	sc1	sc2	sess	True	True	arslan_100	cerebellum_suit	crossed	all	True	0.1	0.104519088297669	-0.126878540667725	0.129791907993994	-0.740416184012013	0.653968530491251	0.307937060982502	Mon Dec 6 02:33:17 2021
0.326930702534465	s06	100	ridge_arslan_100_alpha_4	glm7	sc1	sc2	sess	True	True	arslan_100	cerebellum_suit	crossed	all	True	0.1	0.344869861969627	0.026135344390946	0.438928642287505	-0.12214271542499	0.826862370587581	0.653724741175163	Mon Dec 6 02:33:17 2021
0.351830555980901	s08	100	ridge_arslan_100_alpha_4	glm7	sc1	sc2	sess	True	True	arslan_100	cerebellum_suit	crossed	all	True	0.1	0.228507279344051	-0.063157810132744	0.216358495364167	-0.567283009271665	0.665847960292823	0.331695920585647	Mon Dec 6 02:33:17 2021
0.348649077750339	s09	100	ridge_arslan_100_alpha_4	glm7	sc1	sc2	sess	True	True	arslan_100	cerebellum_suit	crossed	all	True	0.1	0.361622463062762	0.101671600994288	0.372356589815305	-0.255286820369391	0.811455164812841	0.622910329625682	Thu Oct 28 12:25:24 2021
0.308210543332321	s10	100	ridge_arslan_100_alpha_4	glm7	sc1	sc2	sess	True	True	arslan_100	cerebellum_suit	crossed	all	True	0.1	0.380423584350154	0.100984810873744	0.299251181934321	-0.401497636131359	0.849838036270154	0.699676072540309	Thu Oct 28 12:25:24 2021
0.375779813345181	s12	100	ridge_arslan_100_alpha_4	glm7	sc1	sc2	sess	True	True	arslan_100	cerebellum_suit	crossed	all	True	0.1	0.298489376987679	-0.04376108134053	0.24555591625875	-0.5088881674825	0.822752630402175	0.64550526080435	Thu Oct 28 12:25:24 2021
0.332643057562687	s14	100	ridge_arslan_100_alpha_4	glm7	sc1	sc2	sess	True	True	arslan_100	cerebellum_suit	crossed	all	True	0.1	0.146730269827682	-0.105316990530382	0.333939338007503	-0.332121323984993	0.832102043263688	0.664204086527376	Mon Dec 6 02:33:17 2021
0.369867486352848	s15	100	ridge_arslan_100_alpha_4	glm7	sc1	sc2	sess	True	True	arslan_100	cerebellum_suit	crossed	all	True	0.1	0.18824453101757	-0.122242626397415	0.281911854547391	-0.436176290905218	0.797325434076302	0.594650868152605	Thu Oct 28 12:25:24 2021
0.385584012433374	s17	100	ridge_arslan_100_alpha_4	glm7	sc1	sc2	sess	True	True	arslan_100	cerebellum_suit	crossed	all	True	0.1	0.396240909038419	0.118502663423825	0.403711442324702	-0.192577115350598	0.810671933205268	0.621343866410536	Thu Oct 28 12:25:24 2021
0.307313942694927	s18	100	ridge_arslan_100_alpha_4	glm7	sc1	sc2	sess	True	True	arslan_100	cerebellum_suit	crossed	all	True	0.1	0.169418340747458	-0.137967426269343	0.215557982278809	-0.568884035442381	0.714827565194793	0.429655130389586	Thu Oct 28 12:25:24 2021
0.290655333791021	s19	100	ridge_arslan_100_alpha_4	glm7	sc1	sc2	sess	True	True	arslan_100	cerebellum_suit	crossed	all	True	0.1	0.242230602350177	-0.030467121393586	0.254240109492353	-0.491519781015295	0.743648391886443	0.487296783772886	Thu Oct 28 12:25:24 2021
0.350850701051226	s20	100	ridge_arslan_100_alpha_4	glm7	sc1	sc2	sess	True	True	arslan_100	cerebellum_suit	crossed	all	True	0.1	0.297353777665525	0.026468602530961	0.325037423570484	-0.349925152859032	0.592217556906047	0.184435113812094	Thu Oct 28 12:25:24 2021
0.352145233399541	s21	100	ridge_arslan_100_alpha_4	glm7	sc1	sc2	sess	True	True	arslan_100	cerebellum_suit	crossed	all	True	0.1	0.117336658943051	-0.161663377721107	0.195871779559683	-0.608256440880633	0.53773147041018	0.075462940820359	Mon Dec 6 02:33:17 2021
0.352501544744007	s22	100	ridge_arslan_100_alpha_4	glm7	sc1	sc2	sess	True	True	arslan_100	cerebellum_suit	crossed	all	True	0.1	0.41144894741465	0.104912110174373	0.445329703945649	-0.109340592108703	0.780290448497953	0.560580896995906	Mon Dec 6 02:33:17 2021
0.376774900925048	s24	100	ridge_arslan_100_alpha_4	glm7	sc1	sc2	sess	True	True	arslan_100	cerebellum_suit	crossed	all	True	0.1	0.186420340110529	-0.06908068610007	0.206192914360851	-0.587614171278299	0.705830658530313	0.411661317060626	Thu Oct 28 12:25:24 2021
0.335730316906133	s25	100	ridge_arslan_100_alpha_4	glm7	sc1	sc2	sess	True	True	arslan_100	cerebellum_suit	crossed	all	True	0.1	0.26528816091754	-0.057917167280032	0.280142802216838	-0.439714395566324	0.646951397953785	0.29390279590757	Thu Oct 28 12:25:24 2021
0.322810833167187	s26	100	ridge_arslan_100_alpha_4	glm7	sc1	sc2	sess	True	True	arslan_100	cerebellum_suit	crossed	all	True	0.1	0.302533370107794	0.008585231757407	0.379621975955543	-0.240756048088914	0.691238434214328	0.382476868428656	Mon Dec 6 02:33:17 2021
0.35141672901174	s27	100	ridge_arslan_100_alpha_4	glm7	sc1	sc2	sess	True	True	arslan_100	cerebellum_suit	crossed	all	True	0.1	0.279503146562115	-0.017968966893363	0.361738248230639	-0.276523503538723	0.81896580286841	0.637931605736819	Thu Oct 28 12:25:24 2021
0.344514995565879	s28	100	ridge_arslan_100_alpha_4	glm7	sc1	sc2	sess	True	True	arslan_100	cerebellum_suit	crossed	all	True	0.1	0.198121010400616	-0.023110336062932	0.187533468804654	-0.624933062390691	0.661381065778665	0.32276213155733	Thu Oct 28 12:25:24 2021
0.465098051460269	s29	100	ridge_arslan_100_alpha_4	glm7	sc1	sc2	sess	True	True	arslan_100	cerebellum_suit	crossed	all	True	0.1	0.21947717627422	-0.074426976237363	0.208071450849161	-0.583857098301678	0.645496795993964	0.290993591987928	Thu Oct 28 12:25:24 2021
0.441742993130503	s30	100	ridge_arslan_100_alpha_4	glm7	sc1	sc2	sess	True	True	arslan_100	cerebellum_suit	crossed	all	True	0.1	0.118698249467676	-0.183800603541988	0.070360485085245	-0.859279029829511	0.463843814435488	-0.072312371129024	Thu Oct 28 12:25:24 2021
0.380856946120862	s31	100	ridge_arslan_100_alpha_4	glm7	sc1	sc2	sess	True	True	arslan_100	cerebellum_suit	crossed	all	True	0.1	0.147336142025406	-0.15065975587696	0.113204759286153	-0.773590481427694	0.520074269692987	0.040148539385973	Thu Oct 28 12:25:24 2021
0.297385901813694	s02	300	ridge_Schaefer_7_300_alpha_6	glm7	sc1	sc2	sess	True	True	Schaefer_7_300	cerebellum_suit	crossed	all	True	0.1	0.290564300012852	0.057588824415369	0.250541465626943	-0.498917068746113	0.686638973282147	0.373277946564295	Thu Oct 28 12:17:59 2021
0.304100224049256	s03	300	ridge_Schaefer_7_300_alpha_6	glm7	sc1	sc2	sess	True	True	Schaefer_7_300	cerebellum_suit	crossed	all	True	0.1	0.33763849530122	0.086644345292348	0.269163903291232	-0.461672193417536	0.785979608274476	0.571959216548953	Thu Oct 28 12:17:59 2021
0.328597145814082	s04	300	ridge_Schaefer_7_300_alpha_6	glm7	sc1	sc2	sess	True	True	Schaefer_7_300	cerebellum_suit	crossed	all	True	0.1	0.127156023492944	-0.037045920765125	0.129791907993994	-0.740416184012013	0.670178683187997	0.340357366375993	Mon Dec 6 02:33:16 2021
0.30832891910485	s06	300	ridge_Schaefer_7_300_alpha_6	glm7	sc1	sc2	sess	True	True	Schaefer_7_300	cerebellum_suit	crossed	all	True	0.1	0.386513795886841	0.136034280911075	0.438928642287505	-0.12214271542499	0.831189430071932	0.662378860143863	Mon Dec 6 02:33:16 2021
0.337088086657017	s08	300	ridge_Schaefer_7_300_alpha_6	glm7	sc1	sc2	sess	True	True	Schaefer_7_300	cerebellum_suit	crossed	all	True	0.1	0.257001620809478	0.023183117592673	0.216358495364167	-0.567283009271665	0.669969088970704	0.339938177941409	Mon Dec 6 02:33:16 2021
0.340684847889715	s09	300	ridge_Schaefer_7_300_alpha_6	glm7	sc1	sc2	sess	True	True	Schaefer_7_300	cerebellum_suit	crossed	all	True	0.1	0.374033340904074	0.135928346593634	0.372356589815305	-0.255286820369391	0.789090382755257	0.578180765510515	Thu Oct 28 12:17:59 2021
0.302475742110143	s10	300	ridge_Schaefer_7_300_alpha_6	glm7	sc1	sc2	sess	True	True	Schaefer_7_300	cerebellum_suit	crossed	all	True	0.1	0.378787939699253	0.131268285440329	0.299251181934321	-0.401497636131359	0.850999023808389	0.701998047616778	Thu Oct 28 12:17:59 2021
0.359446331468114	s12	300	ridge_Schaefer_7_300_alpha_6	glm7	sc1	sc2	sess	True	True	Schaefer_7_300	cerebellum_suit	crossed	all	True	0.1	0.314705568737991	0.04772253609975	0.24555591625875	-0.5088881674825	0.841721509356261	0.683443018712522	Thu Oct 28 12:17:59 2021
0.316070975507708	s14	300	ridge_Schaefer_7_300_alpha_6	glm7	sc1	sc2	sess	True	True	Schaefer_7_300	cerebellum_suit	crossed	all	True	0.1	0.162438830632937	-0.010106931173655	0.333939338007503	-0.332121323984993	0.845951735106321	0.691903470212642	Mon Dec 6 02:33:16 2021
0.35052729793866	s15	300	ridge_Schaefer_7_300_alpha_6	glm7	sc1	sc2	sess	True	True	Schaefer_7_300	cerebellum_suit	crossed	all	True	0.1	0.222544227558543	-0.009906765370166	0.281911854547391	-0.436176290905218	0.832020867535964	0.664041735071929	Thu Oct 28 12:17:59 2021
0.372539164352319	s17	300	ridge_Schaefer_7_300_alpha_6	glm7	sc1	sc2	sess	True	True	Schaefer_7_300	cerebellum_suit	crossed	all	True	0.1	0.422580214236466	0.171791532594404	0.403711442324702	-0.192577115350598	0.822481677140004	0.644963354280008	Thu Oct 28 12:17:59 2021
0.29248918138057	s18	300	ridge_Schaefer_7_300_alpha_6	glm7	sc1	sc2	sess	True	True	Schaefer_7_300	cerebellum_suit	crossed	all	True	0.1	0.192936736640503	-0.030954624576837	0.215557982278809	-0.568884035442381	0.711948719510464	0.423897439020928	Thu Oct 28 12:17:59 2021
0.279885830498569	s19	300	ridge_Schaefer_7_300_alpha_6	glm7	sc1	sc2	sess	True	True	Schaefer_7_300	cerebellum_suit	crossed	all	True	0.1	0.26258344804583	0.046563364249447	0.254240109492353	-0.491519781015295	0.738142118199547	0.476284236399095	Thu Oct 28 12:17:59 2021
0.340172826819943	s20	300	ridge_Schaefer_7_300_alpha_6	glm7	sc1	sc2	sess	True	True	Schaefer_7_300	cerebellum_suit	crossed	all	True	0.1	0.323786782913304	0.084265003336442	0.325037423570484	-0.349925152859032	0.576758380164374	0.153516760328748	Thu Oct 28 12:17:59 2021
0.335845435191767	s21	300	ridge_Schaefer_7_300_alpha_6	glm7	sc1	sc2	sess	True	True	Schaefer_7_300	cerebellum_suit	crossed	all	True	0.1	0.137954404262971	-0.061355387953932	0.195871779559683	-0.608256440880633	0.501820136594621	0.003640273189241	Mon Dec 6 02:33:16 2021
0.336436702182619	s22	300	ridge_Schaefer_7_300_alpha_6	glm7	sc1	sc2	sess	True	True	Schaefer_7_300	cerebellum_suit	crossed	all	True	0.1	0.439489044601314	0.180277502638372	0.445329703945649	-0.109340592108703	0.788593005456965	0.577186010913929	Mon Dec 6 02:33:16 2021
0.366990200514939	s24	300	ridge_Schaefer_7_300_alpha_6	glm7	sc1	sc2	sess	True	True	Schaefer_7_300	cerebellum_suit	crossed	all	True	0.1	0.194748010038867	-0.016757570092811	0.206192914360851	-0.587614171278299	0.6601580624622	0.320316124924399	Thu Oct 28 12:17:59 2021
0.322892338914864	s25	300	ridge_Schaefer_7_300_alpha_6	glm7	sc1	sc2	sess	True	True	Schaefer_7_300	cerebellum_suit	crossed	all	True	0.1	0.270021468346333	0.01901969523918	0.280142802216838	-0.439714395566324	0.670655476065965	0.341310952131929	Thu Oct 28 12:17:59 2021
0.313386758280557	s26	300	ridge_Schaefer_7_300_alpha_6	glm7	sc1	sc2	sess	True	True	Schaefer_7_300	cerebellum_suit	crossed	all	True	0.1	0.3080422603921	0.064711753602295	0.379621975955543	-0.240756048088914	0.681622152597825	0.36324430519565	Mon Dec 6 02:33:16 2021
0.336589626932621	s27	300	ridge_Schaefer_7_300_alpha_6	glm7	sc1	sc2	sess	True	True	Schaefer_7_300	cerebellum_suit	crossed	all	True	0.1	0.313280241312687	0.071906591921624	0.361738248230639	-0.276523503538723	0.790986657330697	0.581973314661395	Thu Oct 28 12:17:59 2021
0.335996594702686	s28	300	ridge_Schaefer_7_300_alpha_6	glm7	sc1	sc2	sess	True	True	Schaefer_7_300	cerebellum_suit	crossed	all	True	0.1	0.212293842423598	0.020679200915719	0.187533468804654	-0.624933062390691	0.669567611298195	0.339135222596391	Thu Oct 28 12:17:59 2021
0.444456761715524	s29	300	ridge_Schaefer_7_300_alpha_6	glm7	sc1	sc2	sess	True	True	Schaefer_7_300	cerebellum_suit	crossed	all	True	0.1	0.247455372236007	0.021516538739128	0.208071450849161	-0.583857098301678	0.658306134655725	0.316612269311449	Thu Oct 28 12:17:59 2021
0.420586490601158	s30	300	ridge_Schaefer_7_300_alpha_6	glm7	sc1	sc2	sess	True	True	Schaefer_7_300	cerebellum_suit	crossed	all	True	0.1	0.130019362948589	-0.082745252932429	0.070360485085245	-0.859279029829511	0.517257922750929	0.034515845501858	Thu Oct 28 12:17:59 2021
0.363891065396691	s31	300	ridge_Schaefer_7_300_alpha_6	glm7	sc1	sc2	sess	True	True	Schaefer_7_300	cerebellum_suit	crossed	all	True	0.1	0.163703268911002	-0.051332933488344	0.113204759286153	-0.773590481427694	0.524263818325704	0.048527636651408	Thu Oct 28 12:17:59 2021
0.295742377332972	s02	200	ridge_Schaefer_7_200_alpha_6	glm7	sc1	sc2	sess	True	True	Schaefer_7_200	cerebellum_suit	crossed	all	True	0.1	0.28845783068919	0.067018416144689	0.250541465626943	-0.498917068746113	0.674776806274367	0.349553612548734	Thu Oct 28 12:06:40 2021
0.301682628911678	s03	200	ridge_Schaefer_7_200_alpha_6	glm7	sc1	sc2	sess	True	True	Schaefer_7_200	cerebellum_suit	crossed	all	True	0.1	0.336977296629425	0.098613892929414	0.269163903291232	-0.461672193417536	0.778651655788396	0.557303311576793	Thu Oct 28 12:06:40 2021
0.325917425068537	s04	200	ridge_Schaefer_7_200_alpha_6	glm7	sc1	sc2	sess	True	True	Schaefer_7_200	cerebellum_suit	crossed	all	True	0.1	0.12788007367709	-0.020673882217378	0.129791907993994	-0.740416184012013	0.636312946140989	0.272625892281978	Mon Dec 6 02:33:15 2021
0.304575482729655	s06	200	ridge_Schaefer_7_200_alpha_6	glm7	sc1	sc2	sess	True	True	Schaefer_7_200	cerebellum_suit	crossed	all	True	0.1	0.399028495962358	0.156032336679463	0.438928642287505	-0.12214271542499	0.829443709487203	0.658887418974406	Mon Dec 6 02:33:15 2021
0.332580368361382	s08	200	ridge_Schaefer_7_200_alpha_6	glm7	sc1	sc2	sess	True	True	Schaefer_7_200	cerebellum_suit	crossed	all	True	0.1	0.259356069794364	0.047280209693789	0.216358495364167	-0.567283009271665	0.680521052116563	0.361042104233125	Mon Dec 6 02:33:15 2021
0.340079051895648	s09	200	ridge_Schaefer_7_200_alpha_6	glm7	sc1	sc2	sess	True	True	Schaefer_7_200	cerebellum_suit	crossed	all	True	0.1	0.367505744991921	0.134529290670512	0.372356589815305	-0.255286820369391	0.760047375066444	0.520094750132887	Thu Oct 28 12:06:40 2021
0.299909588450632	s10	200	ridge_Schaefer_7_200_alpha_6	glm7	sc1	sc2	sess	True	True	Schaefer_7_200	cerebellum_suit	crossed	all	True	0.1	0.385875274047356	0.144855057700327	0.299251181934321	-0.401497636131359	0.854606475985446	0.709212951970891	Thu Oct 28 12:06:40 2021
0.353994015813431	s12	200	ridge_Schaefer_7_200_alpha_6	glm7	sc1	sc2	sess	True	True	Schaefer_7_200	cerebellum_suit	crossed	all	True	0.1	0.32051013687901	0.076481099390063	0.24555591625875	-0.5088881674825	0.836863610056805	0.67372722011361	Thu Oct 28 12:06:40 2021
0.31336235241005	s14	200	ridge_Schaefer_7_200_alpha_6	glm7	sc1	sc2	sess	True	True	Schaefer_7_200	cerebellum_suit	crossed	all	True	0.1	0.163130586756088	0.003637875098818	0.333939338007503	-0.332121323984993	0.838404429035356	0.676808858070712	Mon Dec 6 02:33:15 2021
0.345546987779655	s15	200	ridge_Schaefer_7_200_alpha_6	glm7	sc1	sc2	sess	True	True	Schaefer_7_200	cerebellum_suit	crossed	all	True	0.1	0.229315139843245	0.018348402284268	0.281911854547391	-0.436176290905218	0.832925625657318	0.665851251314637	Thu Oct 28 12:06:40 2021
0.369899083437477	s17	200	ridge_Schaefer_7_200_alpha_6	glm7	sc1	sc2	sess	True	True	Schaefer_7_200	cerebellum_suit	crossed	all	True	0.1	0.426037150157049	0.179788424848766	0.403711442324702	-0.192577115350598	0.811931001086122	0.623862002172245	Thu Oct 28 12:06:40 2021
0.288714743072566	s18	200	ridge_Schaefer_7_200_alpha_6	glm7	sc1	sc2	sess	True	True	Schaefer_7_200	cerebellum_suit	crossed	all	True	0.1	0.196530071712664	-0.004964754030723	0.215557982278809	-0.568884035442381	0.701498787961152	0.402997575922303	Thu Oct 28 12:06:40 2021
0.276928967915026	s19	200	ridge_Schaefer_7_200_alpha_6	glm7	sc1	sc2	sess	True	True	Schaefer_7_200	cerebellum_suit	crossed	all	True	0.1	0.272126824980769	0.066775973135378	0.254240109492353	-0.491519781015295	0.706502421880665	0.41300484376133	Thu Oct 28 12:06:40 2021
0.338574130600811	s20	200	ridge_Schaefer_7_200_alpha_6	glm7	sc1	sc2	sess	True	True	Schaefer_7_200	cerebellum_suit	crossed	all	True	0.1	0.322518656348515	0.090474416000395	0.325037423570484	-0.349925152859032	0.560639648156227	0.121279296312454	Thu Oct 28 12:06:40 2021
0.33286363585186	s21	200	ridge_Schaefer_7_200_alpha_6	glm7	sc1	sc2	sess	True	True	Schaefer_7_200	cerebellum_suit	crossed	all	True	0.1	0.125953173490552	-0.045339120127904	0.195871779559683	-0.608256440880633	0.480452193500524	-0.039095612998952	Mon Dec 6 02:33:15 2021
0.33325008386098	s22	200	ridge_Schaefer_7_200_alpha_6	glm7	sc1	sc2	sess	True	True	Schaefer_7_200	cerebellum_suit	crossed	all	True	0.1	0.442485361148291	0.190784947975689	0.445329703945649	-0.109340592108703	0.783973113751072	0.567946227502145	Mon Dec 6 02:33:15 2021
0.363374531689904	s24	200	ridge_Schaefer_7_200_alpha_6	glm7	sc1	sc2	sess	True	True	Schaefer_7_200	cerebellum_suit	crossed	all	True	0.1	0.195546359577304	0.002341122369254	0.206192914360851	-0.587614171278299	0.634199847813409	0.268399695626818	Thu Oct 28 12:06:40 2021
0.319690051383098	s25	200	ridge_Schaefer_7_200_alpha_6	glm7	sc1	sc2	sess	True	True	Schaefer_7_200	cerebellum_suit	crossed	all	True	0.1	0.270575788904673	0.036591795244998	0.280142802216838	-0.439714395566324	0.670578732123608	0.341157464247216	Thu Oct 28 12:06:40 2021
0.30998370643781	s26	200	ridge_Schaefer_7_200_alpha_6	glm7	sc1	sc2	sess	True	True	Schaefer_7_200	cerebellum_suit	crossed	all	True	0.1	0.314853653643541	0.083998024482842	0.379621975955543	-0.240756048088914	0.681702498430807	0.363404996861614	Mon Dec 6 02:33:15 2021
0.333825810961399	s27	200	ridge_Schaefer_7_200_alpha_6	glm7	sc1	sc2	sess	True	True	Schaefer_7_200	cerebellum_suit	crossed	all	True	0.1	0.315114911304931	0.08812565002372	0.361738248230639	-0.276523503538723	0.734205013679405	0.46841002735881	Thu Oct 28 12:06:40 2021
0.333318524215907	s28	200	ridge_Schaefer_7_200_alpha_6	glm7	sc1	sc2	sess	True	True	Schaefer_7_200	cerebellum_suit	crossed	all	True	0.1	0.214252370783184	0.034363283405982	0.187533468804654	-0.624933062390691	0.674872020410089	0.349744040820178	Thu Oct 28 12:06:40 2021
0.441108618204274	s29	200	ridge_Schaefer_7_200_alpha_6	glm7	sc1	sc2	sess	True	True	Schaefer_7_200	cerebellum_suit	crossed	all	True	0.1	0.241050848486725	0.035312977177136	0.208071450849161	-0.583857098301678	0.641455576810888	0.282911153621775	Thu Oct 28 12:06:40 2021
0.41627287578618	s30	200	ridge_Schaefer_7_200_alpha_6	glm7	sc1	sc2	sess	True	True	Schaefer_7_200	cerebellum_suit	crossed	all	True	0.1	0.125768005670168	-0.064166137727565	0.070360485085245	-0.859279029829511	0.515819920508351	0.031639841016702	Thu Oct 28 12:06:40 2021
0.35966346833697	s31	200	ridge_Schaefer_7_200_alpha_6	glm7	sc1	sc2	sess	True	True	Schaefer_7_200	cerebellum_suit	crossed	all	True	0.1	0.167025727472109	-0.026979916250271	0.113204759286153	-0.773590481427694	0.530842761472231	0.061685522944462	Thu Oct 28 12:06:40 2021
0.307381561274674	s02	100	ridge_Schaefer_7_100_alpha_4	glm7	sc1	sc2	sess	True	True	Schaefer_7_100	cerebellum_suit	crossed	all	True	0.1	0.273398007139652	-0.005886634205011	0.250541465626943	-0.498917068746113	0.651087599821241	0.302175199642482	Thu Oct 28 11:57:21 2021
0.32099798382257	s03	100	ridge_Schaefer_7_100_alpha_4	glm7	sc1	sc2	sess	True	True	Schaefer_7_100	cerebellum_suit	crossed	all	True	0.1	0.29769136325155	-0.018636433580187	0.269163903291232	-0.461672193417536	0.791069816238907	0.582139632477813	Thu Oct 28 11:57:21 2021
0.342007767954625	s04	100	ridge_Schaefer_7_100_alpha_4	glm7	sc1	sc2	sess	True	True	Schaefer_7_100	cerebellum_suit	crossed	all	True	0.1	0.104820553119914	-0.121708037721675	0.129791907993994	-0.740416184012013	0.633630352979859	0.267260705959717	Mon Dec 6 02:33:14 2021
0.319437434685173	s06	100	ridge_Schaefer_7_100_alpha_4	glm7	sc1	sc2	sess	True	True	Schaefer_7_100	cerebellum_suit	crossed	all	True	0.1	0.367165618705272	0.076001361235786	0.438928642287505	-0.12214271542499	0.819775016804821	0.639550033609643	Mon Dec 6 02:33:14 2021
0.352559771255178	s08	100	ridge_Schaefer_7_100_alpha_4	glm7	sc1	sc2	sess	True	True	Schaefer_7_100	cerebellum_suit	crossed	all	True	0.1	0.228084540346901	-0.067295498733641	0.216358495364167	-0.567283009271665	0.637349618572598	0.274699237145195	Mon Dec 6 02:33:14 2021
0.348993796282705	s09	100	ridge_Schaefer_7_100_alpha_4	glm7	sc1	sc2	sess	True	True	Schaefer_7_100	cerebellum_suit	crossed	all	True	0.1	0.361812942479094	0.100920844983179	0.372356589815305	-0.255286820369391	0.786782206392343	0.573564412784685	Thu Oct 28 11:57:21 2021
0.309121586986906	s10	100	ridge_Schaefer_7_100_alpha_4	glm7	sc1	sc2	sess	True	True	Schaefer_7_100	cerebellum_suit	crossed	all	True	0.1	0.369805101661888	0.09484780775335	0.299251181934321	-0.401497636131359	0.847213869917006	0.694427739834012	Thu Oct 28 11:57:21 2021
0.373848042536974	s12	100	ridge_Schaefer_7_100_alpha_4	glm7	sc1	sc2	sess	True	True	Schaefer_7_100	cerebellum_suit	crossed	all	True	0.1	0.298815114841194	-0.032139814789099	0.24555591625875	-0.5088881674825	0.820883692582687	0.641767385165374	Thu Oct 28 11:57:21 2021
0.329814204769408	s14	100	ridge_Schaefer_7_100_alpha_4	glm7	sc1	sc2	sess	True	True	Schaefer_7_100	cerebellum_suit	crossed	all	True	0.1	0.150760399212537	-0.08735954480603	0.333939338007503	-0.332121323984993	0.824770315022447	0.649540630044894	Mon Dec 6 02:33:14 2021
0.365488013330175	s15	100	ridge_Schaefer_7_100_alpha_4	glm7	sc1	sc2	sess	True	True	Schaefer_7_100	cerebellum_suit	crossed	all	True	0.1	0.208118191853546	-0.095918304994504	0.281911854547391	-0.436176290905218	0.803380822170939	0.606761644341878	Thu Oct 28 11:57:21 2021
0.384956353493079	s17	100	ridge_Schaefer_7_100_alpha_4	glm7	sc1	sc2	sess	True	True	Schaefer_7_100	cerebellum_suit	crossed	all	True	0.1	0.398968630723116	0.121695292459655	0.403711442324702	-0.192577115350598	0.815647942629604	0.631295885259207	Thu Oct 28 11:57:21 2021
0.30690291627098	s18	100	ridge_Schaefer_7_100_alpha_4	glm7	sc1	sc2	sess	True	True	Schaefer_7_100	cerebellum_suit	crossed	all	True	0.1	0.166188682213493	-0.135592742144849	0.215557982278809	-0.568884035442381	0.687037377143672	0.374074754287343	Thu Oct 28 11:57:21 2021
0.287608406908289	s19	100	ridge_Schaefer_7_100_alpha_4	glm7	sc1	sc2	sess	True	True	Schaefer_7_100	cerebellum_suit	crossed	all	True	0.1	0.243181531660091	-0.007271977942418	0.254240109492353	-0.491519781015295	0.721025575671087	0.442051151342174	Thu Oct 28 11:57:21 2021
0.347065488420291	s20	100	ridge_Schaefer_7_100_alpha_4	glm7	sc1	sc2	sess	True	True	Schaefer_7_100	cerebellum_suit	crossed	all	True	0.1	0.314678248424689	0.050629376813822	0.325037423570484	-0.349925152859032	0.582073246266109	0.164146492532217	Thu Oct 28 11:57:21 2021
0.349866715816931	s21	100	ridge_Schaefer_7_100_alpha_4	glm7	sc1	sc2	sess	True	True	Schaefer_7_100	cerebellum_suit	crossed	all	True	0.1	0.125505352592394	-0.146377604078622	0.195871779559683	-0.608256440880633	0.49486507141828	-0.010269857163441	Mon Dec 6 02:33:14 2021
0.351742405480018	s22	100	ridge_Schaefer_7_100_alpha_4	glm7	sc1	sc2	sess	True	True	Schaefer_7_100	cerebellum_suit	crossed	all	True	0.1	0.419162383893054	0.111871937923503	0.445329703945649	-0.109340592108703	0.777096060868241	0.554192121736481	Mon Dec 6 02:33:14 2021
0.377059212411733	s24	100	ridge_Schaefer_7_100_alpha_4	glm7	sc1	sc2	sess	True	True	Schaefer_7_100	cerebellum_suit	crossed	all	True	0.1	0.184312690116938	-0.070844004316679	0.206192914360851	-0.587614171278299	0.682525989440602	0.365051978881204	Thu Oct 28 11:57:21 2021
0.335054399793292	s25	100	ridge_Schaefer_7_100_alpha_4	glm7	sc1	sc2	sess	True	True	Schaefer_7_100	cerebellum_suit	crossed	all	True	0.1	0.25932366464423	-0.054507548416144	0.280142802216838	-0.439714395566324	0.662745338816761	0.325490677633522	Thu Oct 28 11:57:21 2021
0.324739121734022	s26	100	ridge_Schaefer_7_100_alpha_4	glm7	sc1	sc2	sess	True	True	Schaefer_7_100	cerebellum_suit	crossed	all	True	0.1	0.283037037492781	-0.004312809343136	0.379621975955543	-0.240756048088914	0.668778869142401	0.337557738284801	Mon Dec 6 02:33:14 2021
0.352166470733127	s27	100	ridge_Schaefer_7_100_alpha_4	glm7	sc1	sc2	sess	True	True	Schaefer_7_100	cerebellum_suit	crossed	all	True	0.1	0.28366837193341	-0.019933581929712	0.361738248230639	-0.276523503538723	0.813412793101424	0.626825586202848	Thu Oct 28 11:57:21 2021
0.344097593706051	s28	100	ridge_Schaefer_7_100_alpha_4	glm7	sc1	sc2	sess	True	True	Schaefer_7_100	cerebellum_suit	crossed	all	True	0.1	0.199220338393719	-0.021545076163718	0.187533468804654	-0.624933062390691	0.619756038976261	0.239512077952522	Thu Oct 28 11:57:22 2021
0.463822414476114	s29	100	ridge_Schaefer_7_100_alpha_4	glm7	sc1	sc2	sess	True	True	Schaefer_7_100	cerebellum_suit	crossed	all	True	0.1	0.226026986800323	-0.068880762643933	0.208071450849161	-0.583857098301678	0.643040417109195	0.286080834218391	Thu Oct 28 11:57:22 2021
0.439363846262824	s30	100	ridge_Schaefer_7_100_alpha_4	glm7	sc1	sc2	sess	True	True	Schaefer_7_100	cerebellum_suit	crossed	all	True	0.1	0.125278018612991	-0.171404256528612	0.070360485085245	-0.859279029829511	0.453840486049372	-0.092319027901256	Thu Oct 28 11:57:22 2021
0.380343369805361	s31	100	ridge_Schaefer_7_100_alpha_4	glm7	sc1	sc2	sess	True	True	Schaefer_7_100	cerebellum_suit	crossed	all	True	0.1	0.151683914727576	-0.147852290536352	0.113204759286153	-0.773590481427694	0.517633279978112	0.035266559956224	Thu Oct 28 11:57:22 2021
6.72743423483412	s02	7	WTA_yeo7	glm7	sc1	sc2	sess	True	True	yeo7	cerebellum_suit	crossed	all	True	0.1	0.167882317819543	-813.243676350598	0.250541465626943	-0.498917068746113	0.493524466168291	-0.012951067663417	Tue Mar 1 16:14:13 2022
7.30410358066092	s03	7	WTA_yeo7	glm7	sc1	sc2	sess	True	True	yeo7	cerebellum_suit	crossed	all	True	0.1	0.216161196077981	-1096.23551703163	0.269163903291232	-0.461672193417536	0.550719852584379	0.101439705168758	Tue Mar 1 16:14:14 2022
7.15973676636028	s04	7	WTA_yeo7	glm7	sc1	sc2	sess	True	True	yeo7	cerebellum_suit	crossed	all	True	0.1	0.08102516777812	-638.46248511788	0.129791907993994	-0.740416184012013	0.410325920941919	-0.179348158116163	Tue Mar 1 16:14:15 2022
7.57116949544376	s06	7	WTA_yeo7	glm7	sc1	sc2	sess	True	True	yeo7	cerebellum_suit	crossed	all	True	0.1	0.348368081914925	-1033.40383281955	0.438928642287505	-0.12214271542499	0.770407534866985	0.54081506973397	Tue Mar 1 16:14:17 2022
6.3106244199377	s08	7	WTA_yeo7	glm7	sc1	sc2	sess	True	True	yeo7	cerebellum_suit	crossed	all	True	0.1	0.189320419397404	-468.268762362603	0.216358495364167	-0.567283009271665	0.489574950263644	-0.020850099472713	Tue Mar 1 16:14:18 2022
8.25705223395893	s09	7	WTA_yeo7	glm7	sc1	sc2	sess	True	True	yeo7	cerebellum_suit	crossed	all	True	0.1	0.225771148407254	-801.751178837555	0.372356589815305	-0.255286820369391	0.603882508044601	0.207765016089202	Tue Mar 1 16:14:19 2022
6.46198196945732	s10	7	WTA_yeo7	glm7	sc1	sc2	sess	True	True	yeo7	cerebellum_suit	crossed	all	True	0.1	0.251194584197153	-758.825019956563	0.299251181934321	-0.401497636131358	0.709387248721242	0.418774497442484	Tue Mar 1 16:14:20 2022
7.87911344511941	s12	7	WTA_yeo7	glm7	sc1	sc2	sess	True	True	yeo7	cerebellum_suit	crossed	all	True	0.1	0.190200028132701	-828.134324747944	0.24555591625875	-0.5088881674825	0.678144210313251	0.356288420626501	Tue Mar 1 16:14:22 2022
5.72827979503	s14	7	WTA_yeo7	glm7	sc1	sc2	sess	True	True	yeo7	cerebellum_suit	crossed	all	True	0.1	0.118215375282702	-463.797180511122	0.333939338007503	-0.332121323984993	0.74685196561683	0.49370393123366	Tue Mar 1 16:14:23 2022
7.54341959755954	s15	7	WTA_yeo7	glm7	sc1	sc2	sess	True	True	yeo7	cerebellum_suit	crossed	all	True	0.1	0.251306672454097	-655.061689011971	0.281911854547391	-0.436176290905218	0.629479943436887	0.258959886873773	Tue Mar 1 16:14:24 2022
10.5912080810403	s17	7	WTA_yeo7	glm7	sc1	sc2	sess	True	True	yeo7	cerebellum_suit	crossed	all	True	0.1	0.286892432786615	-1186.4678050844	0.403711442324701	-0.192577115350598	0.599607376873209	0.199214753746418	Tue Mar 1 16:14:26 2022
5.52240946148225	s18	7	WTA_yeo7	glm7	sc1	sc2	sess	True	True	yeo7	cerebellum_suit	crossed	all	True	0.1	0.128818887842913	-533.25403085387	0.215557982278809	-0.568884035442381	0.659725593908493	0.319451187816986	Tue Mar 1 16:14:27 2022
5.34143549617108	s19	7	WTA_yeo7	glm7	sc1	sc2	sess	True	True	yeo7	cerebellum_suit	crossed	all	True	0.1	0.135778085232361	-478.278978384643	0.254240109492353	-0.491519781015295	0.441626152614363	-0.116747694771273	Tue Mar 1 16:14:28 2022
11.3704207710662	s20	7	WTA_yeo7	glm7	sc1	sc2	sess	True	True	yeo7	cerebellum_suit	crossed	all	True	0.1	0.210657450984035	-1328.76129403012	0.325037423570484	-0.349925152859032	0.412497384450322	-0.175005231099356	Tue Mar 1 16:14:30 2022
6.40759986385985	s21	7	WTA_yeo7	glm7	sc1	sc2	sess	True	True	yeo7	cerebellum_suit	crossed	all	True	0.1	0.09914744364582	-603.935240954318	0.195871779559683	-0.608256440880633	0.219552691797268	-0.560894616405463	Tue Mar 1 16:14:31 2022
11.2525903514768	s22	7	WTA_yeo7	glm7	sc1	sc2	sess	True	True	yeo7	cerebellum_suit	crossed	all	True	0.1	0.359068467775398	-1720.46660892844	0.445329703945649	-0.109340592108703	0.652102311588935	0.304204623177869	Tue Mar 1 16:14:32 2022
8.8766477308156	s24	7	WTA_yeo7	glm7	sc1	sc2	sess	True	True	yeo7	cerebellum_suit	crossed	all	True	0.1	0.11373628747629	-846.780553172326	0.206192914360851	-0.587614171278299	0.404183653263263	-0.191632693473474	Tue Mar 1 16:14:34 2022
8.34133535431973	s25	7	WTA_yeo7	glm7	sc1	sc2	sess	True	True	yeo7	cerebellum_suit	crossed	all	True	0.1	0.211106782537111	-1061.96728332263	0.280142802216838	-0.439714395566324	0.530907788279233	0.061815576558465	Tue Mar 1 16:14:35 2022
8.0776693145483	s26	7	WTA_yeo7	glm7	sc1	sc2	sess	True	True	yeo7	cerebellum_suit	crossed	all	True	0.1	0.180445970839819	-864.871378045199	0.379621975955543	-0.240756048088914	0.393255075087577	-0.213489849824847	Tue Mar 1 16:14:36 2022
9.37967795343775	s27	7	WTA_yeo7	glm7	sc1	sc2	sess	True	True	yeo7	cerebellum_suit	crossed	all	True	0.1	0.236441276437302	-1009.98493902465	0.361738248230639	-0.276523503538723	0.511059609669585	0.022119219339171	Tue Mar 1 16:14:37 2022
5.95848871323279	s28	7	WTA_yeo7	glm7	sc1	sc2	sess	True	True	yeo7	cerebellum_suit	crossed	all	True	0.1	0.114631229518868	-423.293824937534	0.187533468804654	-0.624933062390691	0.49016453042749	-0.01967093914502	Tue Mar 1 16:14:39 2022
8.75009188606434	s29	7	WTA_yeo7	glm7	sc1	sc2	sess	True	True	yeo7	cerebellum_suit	crossed	all	True	0.1	0.097873701114033	-670.500462711175	0.208071450849161	-0.583857098301678	0.226267621913433	-0.547464756173133	Tue Mar 1 16:14:40 2022
9.49661518939166	s30	7	WTA_yeo7	glm7	sc1	sc2	sess	True	True	yeo7	cerebellum_suit	crossed	all	True	0.1	0.077771142232439	-697.239092100167	0.070360485085245	-0.859279029829511	0.40148590625842	-0.19702818748316	Tue Mar 1 16:14:41 2022
6.94952195379345	s31	7	WTA_yeo7	glm7	sc1	sc2	sess	True	True	yeo7	cerebellum_suit	crossed	all	True	0.1	0.08456617902834	-540.535917784274	0.113204759286153	-0.773590481427694	0.260573875735475	-0.47885224852905	Tue Mar 1 16:14:43 2022
7.89553157723999	s02	17	WTA_yeo17	glm7	sc1	sc2	sess	True	True	yeo17	cerebellum_suit	crossed	all	True	0.1	0.174266168410416	-1109.20696667647	0.250541465626943	-0.498917068746113	0.499973199059688	-5.3601880624532E-05	Tue Mar 1 16:14:49 2022
8.81290358499849	s03	17	WTA_yeo17	glm7	sc1	sc2	sess	True	True	yeo17	cerebellum_suit	crossed	all	True	0.1	0.246674635365835	-1404.53227303577	0.269163903291232	-0.461672193417536	0.615005855551735	0.230011711103471	Tue Mar 1 16:14:50 2022
8.29847490227143	s04	17	WTA_yeo17	glm7	sc1	sc2	sess	True	True	yeo17	cerebellum_suit	crossed	all	True	0.1	0.08397268640449	-838.616519827593	0.129791907993994	-0.740416184012013	0.50431956673745	0.0086391334749	Tue Mar 1 16:14:52 2022
8.75496020643048	s06	17	WTA_yeo17	glm7	sc1	sc2	sess	True	True	yeo17	cerebellum_suit	crossed	all	True	0.1	0.37184980470362	-1282.1173461267	0.438928642287505	-0.12214271542499	0.784693492621706	0.569386985243412	Tue Mar 1 16:14:53 2022
7.46294228677327	s08	17	WTA_yeo17	glm7	sc1	sc2	sess	True	True	yeo17	cerebellum_suit	crossed	all	True	0.1	0.190919129523232	-624.186890247837	0.216358495364167	-0.567283009271665	0.502568306557092	0.005136613114184	Tue Mar 1 16:14:54 2022
9.58751556059003	s09	17	WTA_yeo17	glm7	sc1	sc2	sess	True	True	yeo17	cerebellum_suit	crossed	all	True	0.1	0.246911766481302	-1077.8682033941	0.372356589815305	-0.255286820369391	0.626881923002653	0.253763846005305	Tue Mar 1 16:14:56 2022
8.02183659115041	s10	17	WTA_yeo17	glm7	sc1	sc2	sess	True	True	yeo17	cerebellum_suit	crossed	all	True	0.1	0.277724656045972	-1048.44636008714	0.299251181934321	-0.401497636131359	0.731697091498334	0.463394182996667	Tue Mar 1 16:14:57 2022
9.5405511961835	s12	17	WTA_yeo17	glm7	sc1	sc2	sess	True	True	yeo17	cerebellum_suit	crossed	all	True	0.1	0.212008134161297	-1157.91498846256	0.24555591625875	-0.5088881674825	0.715196850966422	0.430393701932843	Tue Mar 1 16:14:59 2022
6.49439070483201	s14	17	WTA_yeo17	glm7	sc1	sc2	sess	True	True	yeo17	cerebellum_suit	crossed	all	True	0.1	0.115767427423879	-628.44121485738	0.333939338007503	-0.332121323984993	0.776629809685592	0.553259619371185	Tue Mar 1 16:15:00 2022
8.40121256769735	s15	17	WTA_yeo17	glm7	sc1	sc2	sess	True	True	yeo17	cerebellum_suit	crossed	all	True	0.1	0.262983486360141	-784.35936280447	0.281911854547391	-0.436176290905218	0.646391503313529	0.292783006627059	Tue Mar 1 16:15:02 2022
12.0839783426601	s17	17	WTA_yeo17	glm7	sc1	sc2	sess	True	True	yeo17	cerebellum_suit	crossed	all	True	0.1	0.315351374286182	-1450.12727709684	0.403711442324702	-0.192577115350598	0.644248844250582	0.288497688501163	Tue Mar 1 16:15:03 2022
6.87476318718575	s18	17	WTA_yeo17	glm7	sc1	sc2	sess	True	True	yeo17	cerebellum_suit	crossed	all	True	0.1	0.148951347032278	-756.017487153906	0.215557982278809	-0.568884035442381	0.676615948353325	0.35323189670665	Tue Mar 1 16:15:05 2022
5.99822427266914	s19	17	WTA_yeo17	glm7	sc1	sc2	sess	True	True	yeo17	cerebellum_suit	crossed	all	True	0.1	0.15476478155637	-583.382502627092	0.254240109492353	-0.491519781015295	0.478878377183457	-0.042243245633087	Tue Mar 1 16:15:06 2022
12.134358469478	s20	17	WTA_yeo17	glm7	sc1	sc2	sess	True	True	yeo17	cerebellum_suit	crossed	all	True	0.1	0.225393179946123	-1507.961666209	0.325037423570484	-0.349925152859032	0.460409398431953	-0.079181203136094	Tue Mar 1 16:15:07 2022
8.1519242304976	s21	17	WTA_yeo17	glm7	sc1	sc2	sess	True	True	yeo17	cerebellum_suit	crossed	all	True	0.1	0.102134006219637	-888.609804178845	0.195871779559683	-0.608256440880633	0.286407668080279	-0.427184663839441	Tue Mar 1 16:15:09 2022
12.9722808114524	s22	17	WTA_yeo17	glm7	sc1	sc2	sess	True	True	yeo17	cerebellum_suit	crossed	all	True	0.1	0.369779583008066	-2111.88250920922	0.445329703945649	-0.109340592108703	0.701442128257204	0.402884256514408	Tue Mar 1 16:15:10 2022
10.8506992040072	s24	17	WTA_yeo17	glm7	sc1	sc2	sess	True	True	yeo17	cerebellum_suit	crossed	all	True	0.1	0.098997681411565	-1278.06866101508	0.206192914360851	-0.587614171278299	0.538938261939278	0.077876523878555	Tue Mar 1 16:15:12 2022
9.76324441662256	s25	17	WTA_yeo17	glm7	sc1	sc2	sess	True	True	yeo17	cerebellum_suit	crossed	all	True	0.1	0.227306938109559	-1331.44448388236	0.280142802216838	-0.439714395566324	0.561981938096276	0.123963876192552	Tue Mar 1 16:15:13 2022
9.59607663633034	s26	17	WTA_yeo17	glm7	sc1	sc2	sess	True	True	yeo17	cerebellum_suit	crossed	all	True	0.1	0.186095651760655	-1157.51367537277	0.379621975955543	-0.240756048088914	0.434627414428429	-0.130745171143141	Tue Mar 1 16:15:14 2022
10.7254731616137	s27	17	WTA_yeo17	glm7	sc1	sc2	sess	True	True	yeo17	cerebellum_suit	crossed	all	True	0.1	0.253787196268838	-1341.95134128727	0.361738248230639	-0.276523503538723	0.575415640920077	0.150831281840154	Tue Mar 1 16:15:16 2022
7.20904301392103	s28	17	WTA_yeo17	glm7	sc1	sc2	sess	True	True	yeo17	cerebellum_suit	crossed	all	True	0.1	0.124015326464325	-576.849158170625	0.187533468804654	-0.624933062390691	0.487855143455523	-0.024289713088955	Tue Mar 1 16:15:17 2022
10.7924115211414	s29	17	WTA_yeo17	glm7	sc1	sc2	sess	True	True	yeo17	cerebellum_suit	crossed	all	True	0.1	0.142406093049637	-890.440000820306	0.208071450849161	-0.583857098301678	0.328264238961103	-0.343471522077794	Tue Mar 1 16:15:19 2022
11.0722655810745	s30	17	WTA_yeo17	glm7	sc1	sc2	sess	True	True	yeo17	cerebellum_suit	crossed	all	True	0.1	0.081093056525213	-917.58135557684	0.070360485085245	-0.859279029829511	0.375189655565236	-0.249620688869528	Tue Mar 1 16:15:20 2022
8.49593578395555	s31	17	WTA_yeo17	glm7	sc1	sc2	sess	True	True	yeo17	cerebellum_suit	crossed	all	True	0.1	0.103587517227995	-761.936071306147	0.113204759286153	-0.773590481427694	0.389379608792785	-0.22124078241443	Tue Mar 1 16:15:22 2022
12.6563847542185	s02	1848	WTA_tessels1002	glm7	sc1	sc2	sess	True	True	tessels1002	cerebellum_suit	crossed	all	True	0.1	0.235404454630112	-2255.96869464216	0.250541465626943	-0.498917068746113	0.554258469210884	0.108516938421767	Tue Mar 1 16:13:10 2022
14.1766187281717	s03	1848	WTA_tessels1002	glm7	sc1	sc2	sess	True	True	tessels1002	cerebellum_suit	crossed	all	True	0.1	0.293343959895798	-2631.26164201362	0.269163903291232	-0.461672193417536	0.626997557425792	0.253995114851584	Tue Mar 1 16:13:13 2022
13.8610568948033	s04	1848	WTA_tessels1002	glm7	sc1	sc2	sess	True	True	tessels1002	cerebellum_suit	crossed	all	True	0.1	0.071418359564569	-2076.53750439107	0.129791907993994	-0.740416184012013	0.386878330928367	-0.226243338143265	Tue Mar 1 16:13:15 2022
12.9240318498977	s06	1848	WTA_tessels1002	glm7	sc1	sc2	sess	True	True	tessels1002	cerebellum_suit	crossed	all	True	0.1	0.377158022414835	-2276.44057077368	0.438928642287505	-0.12214271542499	0.719263926996017	0.438527853992034	Tue Mar 1 16:13:18 2022
14.649522559707	s08	1848	WTA_tessels1002	glm7	sc1	sc2	sess	True	True	tessels1002	cerebellum_suit	crossed	all	True	0.1	0.19530888684251	-2096.48837985153	0.216358495364167	-0.567283009271665	0.466479773367208	-0.067040453265583	Tue Mar 1 16:13:20 2022
15.0391823369594	s09	1848	WTA_tessels1002	glm7	sc1	sc2	sess	True	True	tessels1002	cerebellum_suit	crossed	all	True	0.1	0.27707700755637	-2091.35144504475	0.372356589815305	-0.255286820369391	0.608356322940628	0.216712645881255	Tue Mar 1 16:13:22 2022
14.5498178053226	s10	1848	WTA_tessels1002	glm7	sc1	sc2	sess	True	True	tessels1002	cerebellum_suit	crossed	all	True	0.1	0.326869711024886	-2612.05333383123	0.299251181934321	-0.401497636131359	0.702717886424646	0.405435772849293	Tue Mar 1 16:13:25 2022
16.2250480377696	s12	1848	WTA_tessels1002	glm7	sc1	sc2	sess	True	True	tessels1002	cerebellum_suit	crossed	all	True	0.1	0.234697955354379	-2362.30202909877	0.24555591625875	-0.5088881674825	0.618597437258409	0.237194874516818	Tue Mar 1 16:13:27 2022
12.5062256133262	s14	1848	WTA_tessels1002	glm7	sc1	sc2	sess	True	True	tessels1002	cerebellum_suit	crossed	all	True	0.1	0.109530676603529	-2017.31192810808	0.333939338007503	-0.332121323984993	0.740042030873996	0.480084061747991	Tue Mar 1 16:13:30 2022
14.8605111838287	s15	1848	WTA_tessels1002	glm7	sc1	sc2	sess	True	True	tessels1002	cerebellum_suit	crossed	all	True	0.1	0.252022922986356	-2037.92253042238	0.281911854547391	-0.436176290905218	0.589135044789722	0.178270089579444	Tue Mar 1 16:13:32 2022
17.4151811486893	s17	1848	WTA_tessels1002	glm7	sc1	sc2	sess	True	True	tessels1002	cerebellum_suit	crossed	all	True	0.1	0.379248978727653	-2443.60168537255	0.403711442324702	-0.192577115350598	0.708867105426524	0.417734210853047	Tue Mar 1 16:13:34 2022
12.1295849398826	s18	1848	WTA_tessels1002	glm7	sc1	sc2	sess	True	True	tessels1002	cerebellum_suit	crossed	all	True	0.1	0.152538681167304	-1980.61032280647	0.215557982278809	-0.568884035442381	0.565010814205373	0.130021628410747	Tue Mar 1 16:13:37 2022
10.4095226209897	s19	1848	WTA_tessels1002	glm7	sc1	sc2	sess	True	True	tessels1002	cerebellum_suit	crossed	all	True	0.1	0.228873963551751	-1548.98373378558	0.254240109492353	-0.491519781015295	0.549461476862133	0.098922953724266	Tue Mar 1 16:13:40 2022
16.8241118282649	s20	1848	WTA_tessels1002	glm7	sc1	sc2	sess	True	True	tessels1002	cerebellum_suit	crossed	all	True	0.1	0.259577045108679	-2561.59829231439	0.325037423570484	-0.349925152859032	0.507520215204505	0.01504043040901	Tue Mar 1 16:13:42 2022
14.6262487079466	s21	1848	WTA_tessels1002	glm7	sc1	sc2	sess	True	True	tessels1002	cerebellum_suit	crossed	all	True	0.1	0.108537624145927	-2246.22815811985	0.195871779559683	-0.608256440880633	0.284157734105113	-0.431684531789774	Tue Mar 1 16:13:44 2022
18.1640965066751	s22	1848	WTA_tessels1002	glm7	sc1	sc2	sess	True	True	tessels1002	cerebellum_suit	crossed	all	True	0.1	0.401161788896771	-3252.28188672432	0.445329703945649	-0.109340592108703	0.710917820266266	0.421835640532533	Tue Mar 1 16:13:46 2022
15.6065091653275	s24	1848	WTA_tessels1002	glm7	sc1	sc2	sess	True	True	tessels1002	cerebellum_suit	crossed	all	True	0.1	0.156593558628075	-2029.16367135275	0.206192914360851	-0.587614171278299	0.562555438770001	0.125110877540003	Tue Mar 1 16:13:49 2022
15.4173641825077	s25	1848	WTA_tessels1002	glm7	sc1	sc2	sess	True	True	tessels1002	cerebellum_suit	crossed	all	True	0.1	0.229759187659349	-2577.24514928204	0.280142802216838	-0.439714395566324	0.498705268144703	-0.002589463710595	Tue Mar 1 16:13:51 2022
15.5034075123605	s26	1848	WTA_tessels1002	glm7	sc1	sc2	sess	True	True	tessels1002	cerebellum_suit	crossed	all	True	0.1	0.271917695017279	-2615.49329724345	0.379621975955543	-0.240756048088914	0.531223927307782	0.062447854615565	Tue Mar 1 16:13:54 2022
16.3174788975281	s27	1848	WTA_tessels1002	glm7	sc1	sc2	sess	True	True	tessels1002	cerebellum_suit	crossed	all	True	0.1	0.273258980779958	-2561.65821586964	0.361738248230639	-0.276523503538723	0.588813500279792	0.177627000559584	Tue Mar 1 16:13:56 2022
14.2877926024357	s28	1848	WTA_tessels1002	glm7	sc1	sc2	sess	True	True	tessels1002	cerebellum_suit	crossed	all	True	0.1	0.139770800548164	-2001.70570417737	0.187533468804654	-0.624933062390691	0.416217886989711	-0.167564226020577	Tue Mar 1 16:13:58 2022
21.1294082701678	s29	1848	WTA_tessels1002	glm7	sc1	sc2	sess	True	True	tessels1002	cerebellum_suit	crossed	all	True	0.1	0.176064593782406	-2642.83084035388	0.208071450849161	-0.583857098301678	0.455107466996183	-0.089785066007635	Tue Mar 1 16:14:01 2022
17.8965383916316	s30	1848	WTA_tessels1002	glm7	sc1	sc2	sess	True	True	tessels1002	cerebellum_suit	crossed	all	True	0.1	0.090268058971925	-2113.27445342112	0.070360485085245	-0.859279029829511	0.392492984024571	-0.215014031950858	Tue Mar 1 16:14:03 2022
14.9283760623198	s31	1848	WTA_tessels1002	glm7	sc1	sc2	sess	True	True	tessels1002	cerebellum_suit	crossed	all	True	0.1	0.120273244800448	-2051.14220632413	0.113204759286153	-0.773590481427694	0.459087892304787	-0.081824215390425	Tue Mar 1 16:14:06 2022
12.4466215084061	s02	1190	WTA_tessels0642	glm7	sc1	sc2	sess	True	True	tessels0642	cerebellum_suit	crossed	all	True	0.1	0.238850850990312	-2193.28798544024	0.250541465626943	-0.498917068746113	0.551078486974187	0.102156973948373	Tue Mar 1 16:12:15 2022
13.7879471508551	s03	1190	WTA_tessels0642	glm7	sc1	sc2	sess	True	True	tessels0642	cerebellum_suit	crossed	all	True	0.1	0.289135912369897	-2460.53951748023	0.269163903291232	-0.461672193417536	0.62480159512812	0.249603190256239	Tue Mar 1 16:12:17 2022
13.7986091509819	s04	1190	WTA_tessels0642	glm7	sc1	sc2	sess	True	True	tessels0642	cerebellum_suit	crossed	all	True	0.1	0.071679020905852	-2149.08476976195	0.129791907993994	-0.740416184012013	0.376124358947974	-0.247751282104051	Tue Mar 1 16:12:19 2022
12.7109931023928	s06	1190	WTA_tessels0642	glm7	sc1	sc2	sess	True	True	tessels0642	cerebellum_suit	crossed	all	True	0.1	0.387286495662727	-2230.03304257428	0.438928642287505	-0.12214271542499	0.741740173517252	0.483480347034504	Tue Mar 1 16:12:20 2022
14.0797803427423	s08	1190	WTA_tessels0642	glm7	sc1	sc2	sess	True	True	tessels0642	cerebellum_suit	crossed	all	True	0.1	0.205034324031104	-1958.44364669339	0.216358495364167	-0.567283009271665	0.492687094698181	-0.014625810603639	Tue Mar 1 16:12:23 2022
14.8209395013788	s09	1190	WTA_tessels0642	glm7	sc1	sc2	sess	True	True	tessels0642	cerebellum_suit	crossed	all	True	0.1	0.279066503596703	-2086.85792720142	0.372356589815305	-0.255286820369391	0.623873122026991	0.247746244053982	Tue Mar 1 16:12:25 2022
13.8105400157519	s10	1190	WTA_tessels0642	glm7	sc1	sc2	sess	True	True	tessels0642	cerebellum_suit	crossed	all	True	0.1	0.332421021577447	-2402.63591235045	0.299251181934321	-0.401497636131359	0.728011753636314	0.456023507272628	Tue Mar 1 16:12:27 2022
15.5342246051712	s12	1190	WTA_tessels0642	glm7	sc1	sc2	sess	True	True	tessels0642	cerebellum_suit	crossed	all	True	0.1	0.238317160996327	-2179.65605128869	0.24555591625875	-0.5088881674825	0.622001352632963	0.244002705265927	Tue Mar 1 16:12:29 2022
11.5451080831242	s14	1190	WTA_tessels0642	glm7	sc1	sc2	sess	True	True	tessels0642	cerebellum_suit	crossed	all	True	0.1	0.116311158578875	-1679.76036298125	0.333939338007503	-0.332121323984993	0.752725279900065	0.505450559800129	Tue Mar 1 16:12:31 2022
14.3357083800977	s15	1190	WTA_tessels0642	glm7	sc1	sc2	sess	True	True	tessels0642	cerebellum_suit	crossed	all	True	0.1	0.261508038730867	-1910.23147559752	0.281911854547391	-0.436176290905218	0.600303820832021	0.200607641664041	Tue Mar 1 16:12:33 2022
17.1143299598652	s17	1190	WTA_tessels0642	glm7	sc1	sc2	sess	True	True	tessels0642	cerebellum_suit	crossed	all	True	0.1	0.379057662526571	-2376.65345555521	0.403711442324702	-0.192577115350598	0.710987785085551	0.421975570171101	Tue Mar 1 16:12:35 2022
11.6402626718711	s18	1190	WTA_tessels0642	glm7	sc1	sc2	sess	True	True	tessels0642	cerebellum_suit	crossed	all	True	0.1	0.154337332207964	-1845.94501404884	0.215557982278809	-0.568884035442381	0.60119166407637	0.202383328152741	Tue Mar 1 16:12:37 2022
9.98914796745946	s19	1190	WTA_tessels0642	glm7	sc1	sc2	sess	True	True	tessels0642	cerebellum_suit	crossed	all	True	0.1	0.229249537007277	-1457.91467506233	0.254240109492353	-0.491519781015295	0.564198681005523	0.128397362011047	Tue Mar 1 16:12:39 2022
16.3288278199622	s20	1190	WTA_tessels0642	glm7	sc1	sc2	sess	True	True	tessels0642	cerebellum_suit	crossed	all	True	0.1	0.25643180978695	-2395.5742666102	0.325037423570484	-0.349925152859032	0.510234980218477	0.020469960436955	Tue Mar 1 16:12:41 2022
13.7650561120305	s21	1190	WTA_tessels0642	glm7	sc1	sc2	sess	True	True	tessels0642	cerebellum_suit	crossed	all	True	0.1	0.111138704885487	-2007.17403944677	0.195871779559683	-0.608256440880633	0.299148977693596	-0.401702044612807	Tue Mar 1 16:12:43 2022
17.7885825554841	s22	1190	WTA_tessels0642	glm7	sc1	sc2	sess	True	True	tessels0642	cerebellum_suit	crossed	all	True	0.1	0.410161644787562	-3122.81344061499	0.445329703945649	-0.109340592108703	0.727777719735244	0.455555439470487	Tue Mar 1 16:12:45 2022
15.2432487919085	s24	1190	WTA_tessels0642	glm7	sc1	sc2	sess	True	True	tessels0642	cerebellum_suit	crossed	all	True	0.1	0.155804803520249	-1957.80624730758	0.206192914360851	-0.587614171278299	0.557111743404954	0.114223486809907	Tue Mar 1 16:12:47 2022
14.960899201788	s25	1190	WTA_tessels0642	glm7	sc1	sc2	sess	True	True	tessels0642	cerebellum_suit	crossed	all	True	0.1	0.236298942009148	-2467.55143807727	0.280142802216838	-0.439714395566324	0.536205898898202	0.072411797796404	Tue Mar 1 16:12:49 2022
15.0328850371765	s26	1190	WTA_tessels0642	glm7	sc1	sc2	sess	True	True	tessels0642	cerebellum_suit	crossed	all	True	0.1	0.278081394971983	-2485.10403670548	0.379621975955543	-0.240756048088914	0.521442778591939	0.042885557183877	Tue Mar 1 16:12:51 2022
15.9687212502228	s27	1190	WTA_tessels0642	glm7	sc1	sc2	sess	True	True	tessels0642	cerebellum_suit	crossed	all	True	0.1	0.271176871264168	-2497.82193098319	0.361738248230639	-0.276523503538723	0.568106293894648	0.136212587789297	Tue Mar 1 16:12:53 2022
13.8838286666639	s28	1190	WTA_tessels0642	glm7	sc1	sc2	sess	True	True	tessels0642	cerebellum_suit	crossed	all	True	0.1	0.143182603948634	-1955.51958246743	0.187533468804654	-0.624933062390691	0.432873314099817	-0.134253371800366	Tue Mar 1 16:12:55 2022
20.0364234781412	s29	1190	WTA_tessels0642	glm7	sc1	sc2	sess	True	True	tessels0642	cerebellum_suit	crossed	all	True	0.1	0.171639629496269	-2381.42180925266	0.208071450849161	-0.583857098301678	0.445786778342862	-0.108426443314276	Tue Mar 1 16:12:58 2022
17.1476074660103	s30	1190	WTA_tessels0642	glm7	sc1	sc2	sess	True	True	tessels0642	cerebellum_suit	crossed	all	True	0.1	0.095435710677649	-1906.44736698801	0.070360485085245	-0.859279029829511	0.416674579313394	-0.166650841373212	Tue Mar 1 16:13:00 2022
14.3546310237005	s31	1190	WTA_tessels0642	glm7	sc1	sc2	sess	True	True	tessels0642	cerebellum_suit	crossed	all	True	0.1	0.120507688599877	-1841.398556697	0.113204759286153	-0.773590481427694	0.457403647801687	-0.085192704396627	Tue Mar 1 16:13:02 2022
12.194781701846	s02	670	WTA_tessels0362	glm7	sc1	sc2	sess	True	True	tessels0362	cerebellum_suit	crossed	all	True	0.1	0.238741121815417	-2162.72970141211	0.250541465626943	-0.498917068746113	0.551487222728464	0.102974445456928	Tue Mar 1 16:11:26 2022
13.3544872554025	s03	670	WTA_tessels0362	glm7	sc1	sc2	sess	True	True	tessels0362	cerebellum_suit	crossed	all	True	0.1	0.298245719714771	-2387.60610940138	0.269163903291232	-0.461672193417536	0.657004608983996	0.314009217967992	Tue Mar 1 16:11:28 2022
12.9897505566473	s04	670	WTA_tessels0362	glm7	sc1	sc2	sess	True	True	tessels0362	cerebellum_suit	crossed	all	True	0.1	0.072284613375681	-2020.67853190524	0.129791907993994	-0.740416184012013	0.493927178472231	-0.012145643055539	Tue Mar 1 16:11:30 2022
12.3142708850506	s06	670	WTA_tessels0362	glm7	sc1	sc2	sess	True	True	tessels0362	cerebellum_suit	crossed	all	True	0.1	0.394650563674407	-2141.14519025546	0.438928642287505	-0.12214271542499	0.755823189828785	0.51164637965757	Tue Mar 1 16:11:32 2022
13.2807535014895	s08	670	WTA_tessels0362	glm7	sc1	sc2	sess	True	True	tessels0362	cerebellum_suit	crossed	all	True	0.1	0.205522741860509	-1786.48784870637	0.216358495364167	-0.567283009271665	0.507472630051248	0.014945260102496	Tue Mar 1 16:11:34 2022
13.8681266096417	s09	670	WTA_tessels0362	glm7	sc1	sc2	sess	True	True	tessels0362	cerebellum_suit	crossed	all	True	0.1	0.283120482748477	-1835.56724752069	0.372356589815305	-0.255286820369391	0.62206039680116	0.244120793602319	Tue Mar 1 16:11:35 2022
13.016423906936	s10	670	WTA_tessels0362	glm7	sc1	sc2	sess	True	True	tessels0362	cerebellum_suit	crossed	all	True	0.1	0.333505462190568	-2161.31396911052	0.299251181934321	-0.401497636131359	0.73970214053367	0.479404281067339	Tue Mar 1 16:11:37 2022
14.9431337944883	s12	670	WTA_tessels0362	glm7	sc1	sc2	sess	True	True	tessels0362	cerebellum_suit	crossed	all	True	0.1	0.241286321616361	-2055.49659926454	0.24555591625875	-0.5088881674825	0.609254512190068	0.218509024380137	Tue Mar 1 16:11:39 2022
11.03509689377	s14	670	WTA_tessels0362	glm7	sc1	sc2	sess	True	True	tessels0362	cerebellum_suit	crossed	all	True	0.1	0.124629642866121	-1556.78351391314	0.333939338007503	-0.332121323984993	0.762269750030998	0.524539500061996	Tue Mar 1 16:11:41 2022
13.3984177846727	s15	670	WTA_tessels0362	glm7	sc1	sc2	sess	True	True	tessels0362	cerebellum_suit	crossed	all	True	0.1	0.273928734752525	-1677.07626750822	0.281911854547391	-0.436176290905218	0.621176002156285	0.24235200431257	Tue Mar 1 16:11:42 2022
16.9936190924989	s17	670	WTA_tessels0362	glm7	sc1	sc2	sess	True	True	tessels0362	cerebellum_suit	crossed	all	True	0.1	0.375562457816615	-2509.15297801414	0.403711442324702	-0.192577115350598	0.715592253987875	0.431184507975751	Tue Mar 1 16:11:44 2022
10.9266711363237	s18	670	WTA_tessels0362	glm7	sc1	sc2	sess	True	True	tessels0362	cerebellum_suit	crossed	all	True	0.1	0.159784855845648	-1647.06657000142	0.215557982278809	-0.568884035442381	0.626601797989936	0.253203595979872	Tue Mar 1 16:11:46 2022
9.46254178901631	s19	670	WTA_tessels0362	glm7	sc1	sc2	sess	True	True	tessels0362	cerebellum_suit	crossed	all	True	0.1	0.226615521662262	-1320.63729712262	0.254240109492353	-0.491519781015295	0.567288754585072	0.134577509170143	Tue Mar 1 16:11:48 2022
15.6947088133485	s20	670	WTA_tessels0362	glm7	sc1	sc2	sess	True	True	tessels0362	cerebellum_suit	crossed	all	True	0.1	0.263596556359863	-2244.01143526491	0.325037423570484	-0.349925152859032	0.501560838389506	0.003121676779012	Tue Mar 1 16:11:49 2022
13.6724779659264	s21	670	WTA_tessels0362	glm7	sc1	sc2	sess	True	True	tessels0362	cerebellum_suit	crossed	all	True	0.1	0.109385252752664	-2015.3717844754	0.195871779559683	-0.608256440880633	0.287275423782487	-0.425449152435026	Tue Mar 1 16:11:51 2022
17.0005832855827	s22	670	WTA_tessels0362	glm7	sc1	sc2	sess	True	True	tessels0362	cerebellum_suit	crossed	all	True	0.1	0.411994675450556	-2880.75748322635	0.445329703945649	-0.109340592108703	0.740621662189051	0.481243324378103	Tue Mar 1 16:11:53 2022
14.6557439194055	s24	670	WTA_tessels0362	glm7	sc1	sc2	sess	True	True	tessels0362	cerebellum_suit	crossed	all	True	0.1	0.152776975982768	-1838.89083755023	0.206192914360851	-0.587614171278299	0.570797992572714	0.141595985145429	Tue Mar 1 16:11:55 2022
14.2509869923002	s25	670	WTA_tessels0362	glm7	sc1	sc2	sess	True	True	tessels0362	cerebellum_suit	crossed	all	True	0.1	0.244535293053654	-2285.348731896	0.280142802216838	-0.439714395566324	0.555398489211059	0.110796978422118	Tue Mar 1 16:11:57 2022
14.4719161687641	s26	670	WTA_tessels0362	glm7	sc1	sc2	sess	True	True	tessels0362	cerebellum_suit	crossed	all	True	0.1	0.268830029559413	-2314.64369814496	0.379621975955543	-0.240756048088914	0.521116023360943	0.042232046721887	Tue Mar 1 16:11:59 2022
15.1188855529854	s27	670	WTA_tessels0362	glm7	sc1	sc2	sess	True	True	tessels0362	cerebellum_suit	crossed	all	True	0.1	0.278020263931662	-2235.24141873065	0.361738248230639	-0.276523503538723	0.594139957808978	0.188279915617955	Tue Mar 1 16:12:01 2022
12.9810449188841	s28	670	WTA_tessels0362	glm7	sc1	sc2	sess	True	True	tessels0362	cerebellum_suit	crossed	all	True	0.1	0.137955945363128	-1769.23391982412	0.187533468804654	-0.624933062390691	0.350153057648154	-0.299693884703692	Tue Mar 1 16:12:03 2022
18.6815169409484	s29	670	WTA_tessels0362	glm7	sc1	sc2	sess	True	True	tessels0362	cerebellum_suit	crossed	all	True	0.1	0.180334213320416	-2078.24350913949	0.208071450849161	-0.583857098301678	0.439598995130648	-0.120802009738704	Tue Mar 1 16:12:05 2022
16.511276072233	s30	670	WTA_tessels0362	glm7	sc1	sc2	sess	True	True	tessels0362	cerebellum_suit	crossed	all	True	0.1	0.096909453332633	-1797.84161898118	0.070360485085245	-0.859279029829511	0.428234442661716	-0.143531114676568	Tue Mar 1 16:12:07 2022
13.9309122029299	s31	670	WTA_tessels0362	glm7	sc1	sc2	sess	True	True	tessels0362	cerebellum_suit	crossed	all	True	0.1	0.120305692101892	-1785.29983567199	0.113204759286153	-0.773590481427694	0.457088798283751	-0.085822403432498	Tue Mar 1 16:12:08 2022
11.5664689276778	s02	304	WTA_tessels0162	glm7	sc1	sc2	sess	True	True	tessels0162	cerebellum_suit	crossed	all	True	0.1	0.231152367950843	-2009.37582685721	0.250541465626943	-0.498917068746113	0.573440508751133	0.146881017502267	Tue Mar 1 16:10:43 2022
12.000282314279	s03	304	WTA_tessels0162	glm7	sc1	sc2	sess	True	True	tessels0162	cerebellum_suit	crossed	all	True	0.1	0.290744628087913	-2007.5593268651	0.269163903291232	-0.461672193417536	0.633879308859414	0.267758617718828	Tue Mar 1 16:10:45 2022
11.8187348083565	s04	304	WTA_tessels0162	glm7	sc1	sc2	sess	True	True	tessels0162	cerebellum_suit	crossed	all	True	0.1	0.081114997483795	-1550.65744176156	0.129791907993994	-0.740416184012013	0.433178116536022	-0.133643766927955	Tue Mar 1 16:10:46 2022
11.8906465480564	s06	304	WTA_tessels0162	glm7	sc1	sc2	sess	True	True	tessels0162	cerebellum_suit	crossed	all	True	0.1	0.391393975460439	-2089.47094531876	0.438928642287505	-0.12214271542499	0.765363635066536	0.530727270133073	Tue Mar 1 16:10:48 2022
11.7354204178858	s08	304	WTA_tessels0162	glm7	sc1	sc2	sess	True	True	tessels0162	cerebellum_suit	crossed	all	True	0.1	0.202506384194941	-1402.86695813369	0.216358495364167	-0.567283009271665	0.487571507002756	-0.024856985994488	Tue Mar 1 16:10:49 2022
13.3112363807192	s09	304	WTA_tessels0162	glm7	sc1	sc2	sess	True	True	tessels0162	cerebellum_suit	crossed	all	True	0.1	0.275107664093011	-1741.41952510085	0.372356589815305	-0.255286820369391	0.605960302669617	0.211920605339235	Tue Mar 1 16:10:51 2022
12.0724734699892	s10	304	WTA_tessels0162	glm7	sc1	sc2	sess	True	True	tessels0162	cerebellum_suit	crossed	all	True	0.1	0.331079366808989	-1940.15057429293	0.299251181934321	-0.401497636131359	0.742892282557901	0.485784565115801	Tue Mar 1 16:10:52 2022
14.2037435336946	s12	304	WTA_tessels0162	glm7	sc1	sc2	sess	True	True	tessels0162	cerebellum_suit	crossed	all	True	0.1	0.234337810269239	-1900.29759553039	0.24555591625875	-0.5088881674825	0.59309616725668	0.186192334513361	Tue Mar 1 16:10:54 2022
9.88548971088466	s14	304	WTA_tessels0162	glm7	sc1	sc2	sess	True	True	tessels0162	cerebellum_suit	crossed	all	True	0.1	0.131330325967138	-1230.60928500074	0.333939338007503	-0.332121323984993	0.772294306274446	0.544588612548891	Tue Mar 1 16:10:55 2022
12.7085793034186	s15	304	WTA_tessels0162	glm7	sc1	sc2	sess	True	True	tessels0162	cerebellum_suit	crossed	all	True	0.1	0.279629414425976	-1567.90269449656	0.281911854547391	-0.436176290905218	0.637701328292183	0.275402656584366	Tue Mar 1 16:10:57 2022
15.6181313179853	s17	304	WTA_tessels0162	glm7	sc1	sc2	sess	True	True	tessels0162	cerebellum_suit	crossed	all	True	0.1	0.372250660298362	-2096.48879010332	0.403711442324702	-0.192577115350598	0.704337282765032	0.408674565530064	Tue Mar 1 16:10:59 2022
10.1010612315034	s18	304	WTA_tessels0162	glm7	sc1	sc2	sess	True	True	tessels0162	cerebellum_suit	crossed	all	True	0.1	0.163844969965446	-1435.12295145335	0.215557982278809	-0.568884035442381	0.615192885417431	0.230385770834862	Tue Mar 1 16:11:00 2022
8.62861325387684	s19	304	WTA_tessels0162	glm7	sc1	sc2	sess	True	True	tessels0162	cerebellum_suit	crossed	all	True	0.1	0.223262574255722	-1117.81096188619	0.254240109492353	-0.491519781015295	0.576851402083376	0.153702804166753	Tue Mar 1 16:11:02 2022
15.0347401540671	s20	304	WTA_tessels0162	glm7	sc1	sc2	sess	True	True	tessels0162	cerebellum_suit	crossed	all	True	0.1	0.271292615180645	-2108.97788711732	0.325037423570484	-0.349925152859032	0.49911249804326	-0.00177500391348	Tue Mar 1 16:11:04 2022
12.7601461814265	s21	304	WTA_tessels0162	glm7	sc1	sc2	sess	True	True	tessels0162	cerebellum_suit	crossed	all	True	0.1	0.119400212836384	-1774.85670344144	0.195871779559683	-0.608256440880633	0.300754173185787	-0.398491653628426	Tue Mar 1 16:11:05 2022
16.1467583626583	s22	304	WTA_tessels0162	glm7	sc1	sc2	sess	True	True	tessels0162	cerebellum_suit	crossed	all	True	0.1	0.410733915793509	-2754.98539496879	0.445329703945649	-0.109340592108703	0.73465461519163	0.469309230383261	Tue Mar 1 16:11:07 2022
13.6300137570099	s24	304	WTA_tessels0162	glm7	sc1	sc2	sess	True	True	tessels0162	cerebellum_suit	crossed	all	True	0.1	0.151328482390623	-1639.02898684538	0.206192914360851	-0.587614171278299	0.571820330778837	0.143640661557673	Tue Mar 1 16:11:08 2022
13.5429393777181	s25	304	WTA_tessels0162	glm7	sc1	sc2	sess	True	True	tessels0162	cerebellum_suit	crossed	all	True	0.1	0.244585320624987	-2151.44293071105	0.280142802216838	-0.439714395566324	0.556989183115786	0.113978366231572	Tue Mar 1 16:11:10 2022
13.5089939039622	s26	304	WTA_tessels0162	glm7	sc1	sc2	sess	True	True	tessels0162	cerebellum_suit	crossed	all	True	0.1	0.261284907420696	-2050.77164293464	0.379621975955543	-0.240756048088914	0.497148237228235	-0.005703525543529	Tue Mar 1 16:11:11 2022
14.1521380447714	s27	304	WTA_tessels0162	glm7	sc1	sc2	sess	True	True	tessels0162	cerebellum_suit	crossed	all	True	0.1	0.274693281961013	-2026.16844551649	0.361738248230639	-0.276523503538723	0.58487943191909	0.16975886383818	Tue Mar 1 16:11:13 2022
11.0375431327422	s28	304	WTA_tessels0162	glm7	sc1	sc2	sess	True	True	tessels0162	cerebellum_suit	crossed	all	True	0.1	0.151112656566586	-1234.16242913768	0.187533468804654	-0.624933062390691	0.461396798804471	-0.077206402391058	Tue Mar 1 16:11:14 2022
17.8225473726612	s29	304	WTA_tessels0162	glm7	sc1	sc2	sess	True	True	tessels0162	cerebellum_suit	crossed	all	True	0.1	0.169275258270551	-1987.36408754429	0.208071450849161	-0.583857098301678	0.458162499733521	-0.083675000532957	Tue Mar 1 16:11:16 2022
15.2467503951625	s30	304	WTA_tessels0162	glm7	sc1	sc2	sess	True	True	tessels0162	cerebellum_suit	crossed	all	True	0.1	0.097747624188874	-1560.43359081911	0.070360485085245	-0.859279029829511	0.428183300952654	-0.143633398094692	Tue Mar 1 16:11:18 2022
12.333783207877	s31	304	WTA_tessels0162	glm7	sc1	sc2	sess	True	True	tessels0162	cerebellum_suit	crossed	all	True	0.1	0.122796869208533	-1413.29459079786	0.113204759286153	-0.773590481427694	0.467386331511707	-0.065227336976587	Tue Mar 1 16:11:19 2022
9.80952486091652	s02	80	WTA_tessels0042	glm7	sc1	sc2	sess	True	True	tessels0042	cerebellum_suit	crossed	all	True	0.1	0.202874429369569	-1499.57348513672	0.250541465626943	-0.498917068746113	0.541013889822627	0.082027779645254	Tue Mar 1 16:10:00 2022
9.96539565771616	s03	80	WTA_tessels0042	glm7	sc1	sc2	sess	True	True	tessels0042	cerebellum_suit	crossed	all	True	0.1	0.26126424679558	-1506.72710101927	0.269163903291232	-0.461672193417536	0.615590735802166	0.231181471604332	Tue Mar 1 16:10:01 2022
10.2123615077317	s04	80	WTA_tessels0042	glm7	sc1	sc2	sess	True	True	tessels0042	cerebellum_suit	crossed	all	True	0.1	0.080798854912087	-1241.36599624716	0.129791907993994	-0.740416184012013	0.502103813227152	0.004207626454305	Tue Mar 1 16:10:03 2022
10.2616153184723	s06	80	WTA_tessels0042	glm7	sc1	sc2	sess	True	True	tessels0042	cerebellum_suit	crossed	all	True	0.1	0.384057154799322	-1606.32947012828	0.438928642287505	-0.12214271542499	0.772402282050821	0.544804564101643	Tue Mar 1 16:10:04 2022
9.0630844930285	s08	80	WTA_tessels0042	glm7	sc1	sc2	sess	True	True	tessels0042	cerebellum_suit	crossed	all	True	0.1	0.20242897729952	-888.384917306002	0.216358495364167	-0.567283009271665	0.534078164556016	0.068156329112032	Tue Mar 1 16:10:06 2022
10.931475407649	s09	80	WTA_tessels0042	glm7	sc1	sc2	sess	True	True	tessels0042	cerebellum_suit	crossed	all	True	0.1	0.27288743303053	-1319.94729673626	0.372356589815305	-0.255286820369391	0.686117485562597	0.372234971125194	Tue Mar 1 16:10:08 2022
10.0800362532136	s10	80	WTA_tessels0042	glm7	sc1	sc2	sess	True	True	tessels0042	cerebellum_suit	crossed	all	True	0.1	0.306758869881981	-1469.44278110069	0.299251181934321	-0.401497636131359	0.733027306957372	0.466054613914744	Tue Mar 1 16:10:10 2022
10.6116398334938	s12	80	WTA_tessels0042	glm7	sc1	sc2	sess	True	True	tessels0042	cerebellum_suit	crossed	all	True	0.1	0.20109054374986	-1194.35745004527	0.24555591625875	-0.5088881674825	0.642260428732737	0.284520857465474	Tue Mar 1 16:10:11 2022
8.35903005859987	s14	80	WTA_tessels0042	glm7	sc1	sc2	sess	True	True	tessels0042	cerebellum_suit	crossed	all	True	0.1	0.130627572026348	-940.967567539627	0.333939338007503	-0.332121323984993	0.782390946060079	0.564781892120158	Tue Mar 1 16:10:13 2022
10.6254980715452	s15	80	WTA_tessels0042	glm7	sc1	sc2	sess	True	True	tessels0042	cerebellum_suit	crossed	all	True	0.1	0.276302872681806	-1135.32620666436	0.281911854547391	-0.436176290905218	0.660812529834484	0.321625059668969	Tue Mar 1 16:10:15 2022
13.8015320639325	s17	80	WTA_tessels0042	glm7	sc1	sc2	sess	True	True	tessels0042	cerebellum_suit	crossed	all	True	0.1	0.339357753852162	-1645.7537427261	0.403711442324702	-0.192577115350598	0.64808046065149	0.29616092130298	Tue Mar 1 16:10:16 2022
8.09267904645406	s18	80	WTA_tessels0042	glm7	sc1	sc2	sess	True	True	tessels0042	cerebellum_suit	crossed	all	True	0.1	0.159053789309206	-961.279547851886	0.215557982278809	-0.568884035442381	0.616497461681888	0.232994923363776	Tue Mar 1 16:10:18 2022
7.27798842852117	s19	80	WTA_tessels0042	glm7	sc1	sc2	sess	True	True	tessels0042	cerebellum_suit	crossed	all	True	0.1	0.185394756821583	-821.979829428309	0.254240109492353	-0.491519781015295	0.505966554134574	0.011933108269149	Tue Mar 1 16:10:20 2022
13.1917432770661	s20	80	WTA_tessels0042	glm7	sc1	sc2	sess	True	True	tessels0042	cerebellum_suit	crossed	all	True	0.1	0.245366833366345	-1725.13025732257	0.325037423570484	-0.349925152859032	0.474375298117967	-0.051249403764066	Tue Mar 1 16:10:21 2022
10.0495281430943	s21	80	WTA_tessels0042	glm7	sc1	sc2	sess	True	True	tessels0042	cerebellum_suit	crossed	all	True	0.1	0.117595977743838	-1176.57850167822	0.195871779559683	-0.608256440880633	0.299549253674457	-0.400901492651085	Tue Mar 1 16:10:23 2022
14.2144256917264	s22	80	WTA_tessels0042	glm7	sc1	sc2	sess	True	True	tessels0042	cerebellum_suit	crossed	all	True	0.1	0.386419003884115	-2274.28843580738	0.445329703945649	-0.109340592108703	0.697627856161018	0.395255712322035	Tue Mar 1 16:10:24 2022
12.6158655823727	s24	80	WTA_tessels0042	glm7	sc1	sc2	sess	True	True	tessels0042	cerebellum_suit	crossed	all	True	0.1	0.136325745899149	-1485.48257571395	0.206192914360851	-0.587614171278299	0.536880296941737	0.073760593883474	Tue Mar 1 16:10:26 2022
10.9866948908118	s25	80	WTA_tessels0042	glm7	sc1	sc2	sess	True	True	tessels0042	cerebellum_suit	crossed	all	True	0.1	0.229361725111754	-1534.64006600518	0.280142802216838	-0.439714395566324	0.547390325317417	0.094780650634833	Tue Mar 1 16:10:27 2022
11.4257346975431	s26	80	WTA_tessels0042	glm7	sc1	sc2	sess	True	True	tessels0042	cerebellum_suit	crossed	all	True	0.1	0.209211187408358	-1517.66797394082	0.379621975955543	-0.240756048088914	0.433087080412365	-0.13382583917527	Tue Mar 1 16:10:29 2022
12.0154442885334	s27	80	WTA_tessels0042	glm7	sc1	sc2	sess	True	True	tessels0042	cerebellum_suit	crossed	all	True	0.1	0.267269623528749	-1571.18065228736	0.361738248230639	-0.276523503538723	0.583688423312704	0.167376846625408	Tue Mar 1 16:10:30 2022
8.64333335504741	s28	80	WTA_tessels0042	glm7	sc1	sc2	sess	True	True	tessels0042	cerebellum_suit	crossed	all	True	0.1	0.132337663013129	-780.116589106613	0.187533468804654	-0.624933062390691	0.453832969417011	-0.092334061165978	Tue Mar 1 16:10:32 2022
14.1175425481026	s29	80	WTA_tessels0042	glm7	sc1	sc2	sess	True	True	tessels0042	cerebellum_suit	crossed	all	True	0.1	0.145921542637469	-1334.74326982127	0.208071450849161	-0.583857098301678	0.347349428282423	-0.305301143435154	Tue Mar 1 16:10:33 2022
13.04568309655	s30	80	WTA_tessels0042	glm7	sc1	sc2	sess	True	True	tessels0042	cerebellum_suit	crossed	all	True	0.1	0.078785177202981	-1189.09425423458	0.070360485085245	-0.859279029829511	0.352376545792637	-0.295246908414727	Tue Mar 1 16:10:35 2022
9.70548214124573	s31	80	WTA_tessels0042	glm7	sc1	sc2	sess	True	True	tessels0042	cerebellum_suit	crossed	all	True	0.1	0.111338283402634	-896.413790381812	0.113204759286153	-0.773590481427694	0.391257505491094	-0.217484989017813	Tue Mar 1 16:10:36 2022
10.610518256113	s02	200	WTA_shen	glm7	sc1	sc2	sess	True	True	shen	cerebellum_suit	crossed	all	True	0.1	0.223754570920332	-1779.63507738997	0.250541465626943	-0.498917068746113	0.551111298890963	0.102222597781925	Tue Mar 1 16:21:37 2022
11.2428789587848	s03	200	WTA_shen	glm7	sc1	sc2	sess	True	True	shen	cerebellum_suit	crossed	all	True	0.1	0.280760465332211	-1802.44470898287	0.269163903291232	-0.461672193417536	0.61279676320112	0.22559352640224	Tue Mar 1 16:21:38 2022
11.3591971789586	s04	200	WTA_shen	glm7	sc1	sc2	sess	True	True	shen	cerebellum_suit	crossed	all	True	0.1	0.072452793845679	-1474.52743929408	0.129791907993994	-0.740416184012013	0.467047754638739	-0.065904490722521	Tue Mar 1 16:21:40 2022
11.2341482390727	s06	200	WTA_shen	glm7	sc1	sc2	sess	True	True	shen	cerebellum_suit	crossed	all	True	0.1	0.397763892837844	-1950.99152673496	0.438928642287505	-0.12214271542499	0.775247090896209	0.550494181792419	Tue Mar 1 16:21:42 2022
11.2821940609047	s08	200	WTA_shen	glm7	sc1	sc2	sess	True	True	shen	cerebellum_suit	crossed	all	True	0.1	0.180641147994264	-1315.13077445706	0.216358495364167	-0.567283009271665	0.456455906882461	-0.087088186235079	Tue Mar 1 16:21:43 2022
12.0176238261822	s09	200	WTA_shen	glm7	sc1	sc2	sess	True	True	shen	cerebellum_suit	crossed	all	True	0.1	0.26326423681966	-1430.94520247819	0.372356589815305	-0.255286820369391	0.651747977247051	0.303495954494102	Tue Mar 1 16:21:45 2022
11.4096534221884	s10	200	WTA_shen	glm7	sc1	sc2	sess	True	True	shen	cerebellum_suit	crossed	all	True	0.1	0.32466471537659	-1768.76308656525	0.299251181934321	-0.401497636131359	0.724354420765366	0.448708841530731	Tue Mar 1 16:21:46 2022
12.8857883920205	s12	200	WTA_shen	glm7	sc1	sc2	sess	True	True	shen	cerebellum_suit	crossed	all	True	0.1	0.211545979453556	-1615.14085695799	0.24555591625875	-0.5088881674825	0.555007779647658	0.110015559295316	Tue Mar 1 16:21:47 2022
8.95325832613482	s14	200	WTA_shen	glm7	sc1	sc2	sess	True	True	shen	cerebellum_suit	crossed	all	True	0.1	0.118800385408655	-1058.00088732437	0.333939338007503	-0.332121323984993	0.768049530624608	0.536099061249216	Tue Mar 1 16:21:49 2022
11.7703811970891	s15	200	WTA_shen	glm7	sc1	sc2	sess	True	True	shen	cerebellum_suit	crossed	all	True	0.1	0.283865345530394	-1332.22452900559	0.281911854547391	-0.436176290905218	0.66538121750102	0.33076243500204	Tue Mar 1 16:21:50 2022
15.3537139441133	s17	200	WTA_shen	glm7	sc1	sc2	sess	True	True	shen	cerebellum_suit	crossed	all	True	0.1	0.36006459775212	-2046.90815078301	0.403711442324702	-0.192577115350598	0.683813333513491	0.367626667026982	Tue Mar 1 16:21:52 2022
9.14447878039151	s18	200	WTA_shen	glm7	sc1	sc2	sess	True	True	shen	cerebellum_suit	crossed	all	True	0.1	0.166373287931527	-1195.3776270085	0.215557982278809	-0.568884035442381	0.610004740475005	0.220009480950009	Tue Mar 1 16:21:54 2022
8.24200601640347	s19	200	WTA_shen	glm7	sc1	sc2	sess	True	True	shen	cerebellum_suit	crossed	all	True	0.1	0.199422275756698	-1037.23035652217	0.254240109492353	-0.491519781015295	0.536696578615409	0.073393157230819	Tue Mar 1 16:21:55 2022
14.4425183828533	s20	200	WTA_shen	glm7	sc1	sc2	sess	True	True	shen	cerebellum_suit	crossed	all	True	0.1	0.257998583095588	-1951.12135613116	0.325037423570484	-0.349925152859032	0.473614536889295	-0.052770926221411	Tue Mar 1 16:21:57 2022
11.7449807552918	s21	200	WTA_shen	glm7	sc1	sc2	sess	True	True	shen	cerebellum_suit	crossed	all	True	0.1	0.108607738460541	-1490.75447522486	0.195871779559683	-0.608256440880633	0.291187851501024	-0.417624296997952	Tue Mar 1 16:21:58 2022
15.338498063804	s22	200	WTA_shen	glm7	sc1	sc2	sess	True	True	shen	cerebellum_suit	crossed	all	True	0.1	0.408094386317973	-2520.86883749221	0.445329703945649	-0.109340592108703	0.712235139284725	0.42447027856945	Tue Mar 1 16:22:00 2022
13.2986512582585	s24	200	WTA_shen	glm7	sc1	sc2	sess	True	True	shen	cerebellum_suit	crossed	all	True	0.1	0.13837470292373	-1586.73241258055	0.206192914360851	-0.587614171278299	0.522655539483817	0.045311078967634	Tue Mar 1 16:22:01 2022
12.4713847933519	s25	200	WTA_shen	glm7	sc1	sc2	sess	True	True	shen	cerebellum_suit	crossed	all	True	0.1	0.230380838570359	-1889.82021383519	0.280142802216838	-0.439714395566324	0.551368121914608	0.102736243829217	Tue Mar 1 16:22:03 2022
12.7224787297062	s26	200	WTA_shen	glm7	sc1	sc2	sess	True	True	shen	cerebellum_suit	crossed	all	True	0.1	0.26033454900087	-1835.87680061885	0.379621975955543	-0.240756048088914	0.493143432051018	-0.013713135897965	Tue Mar 1 16:22:04 2022
13.3986664067331	s27	200	WTA_shen	glm7	sc1	sc2	sess	True	True	shen	cerebellum_suit	crossed	all	True	0.1	0.269038984415823	-1863.29573227929	0.361738248230639	-0.276523503538723	0.574676290947942	0.149352581895884	Tue Mar 1 16:22:06 2022
11.0464153961737	s28	200	WTA_shen	glm7	sc1	sc2	sess	True	True	shen	cerebellum_suit	crossed	all	True	0.1	0.120819767109514	-1237.25525086558	0.187533468804654	-0.624933062390691	0.315951460134562	-0.368097079730876	Tue Mar 1 16:22:07 2022
17.1704578130463	s29	200	WTA_shen	glm7	sc1	sc2	sess	True	True	shen	cerebellum_suit	crossed	all	True	0.1	0.152774463187121	-1847.25868745492	0.208071450849161	-0.583857098301678	0.385944830341404	-0.228110339317191	Tue Mar 1 16:22:09 2022
14.8120127230157	s30	200	WTA_shen	glm7	sc1	sc2	sess	True	True	shen	cerebellum_suit	crossed	all	True	0.1	0.087724410935668	-1485.63812193743	0.070360485085245	-0.859279029829511	0.39501321461565	-0.2099735707687	Tue Mar 1 16:22:10 2022
11.4389846174035	s31	200	WTA_shen	glm7	sc1	sc2	sess	True	True	shen	cerebellum_suit	crossed	all	True	0.1	0.105362027345198	-1217.22958228462	0.113204759286153	-0.773590481427694	0.36183069110418	-0.27633861779164	Tue Mar 1 16:22:11 2022
11.4009203661704	s02	333	WTA_gordon	glm7	sc1	sc2	sess	True	True	gordon	cerebellum_suit	crossed	all	True	0.1	0.232998424147532	-1903.68110481962	0.250541465626943	-0.498917068746113	0.535389643416657	0.070779286833314	Tue Mar 1 16:20:55 2022
12.1247245698827	s03	333	WTA_gordon	glm7	sc1	sc2	sess	True	True	gordon	cerebellum_suit	crossed	all	True	0.1	0.280688578652234	-2038.13899028024	0.269163903291232	-0.461672193417536	0.585946326639039	0.171892653278079	Tue Mar 1 16:20:56 2022
11.3421918697707	s04	333	WTA_gordon	glm7	sc1	sc2	sess	True	True	gordon	cerebellum_suit	crossed	all	True	0.1	0.083264504234487	-1463.02631251395	0.129791907993994	-0.740416184012013	0.403993283058206	-0.192013433883588	Tue Mar 1 16:20:58 2022
11.4060966363498	s06	333	WTA_gordon	glm7	sc1	sc2	sess	True	True	gordon	cerebellum_suit	crossed	all	True	0.1	0.387579470592575	-1895.9093114282	0.438928642287505	-0.12214271542499	0.755326213567701	0.510652427135402	Tue Mar 1 16:21:00 2022
11.8815639756926	s08	333	WTA_gordon	glm7	sc1	sc2	sess	True	True	gordon	cerebellum_suit	crossed	all	True	0.1	0.191626995663755	-1448.85636716257	0.216358495364167	-0.567283009271665	0.475856178672033	-0.048287642655934	Tue Mar 1 16:21:01 2022
13.1780475895426	s09	333	WTA_gordon	glm7	sc1	sc2	sess	True	True	gordon	cerebellum_suit	crossed	all	True	0.1	0.279216515744001	-1730.81486628209	0.372356589815305	-0.255286820369391	0.634508503754226	0.269017007508452	Tue Mar 1 16:21:03 2022
12.1286390298301	s10	333	WTA_gordon	glm7	sc1	sc2	sess	True	True	gordon	cerebellum_suit	crossed	all	True	0.1	0.329108861528136	-1964.84932851196	0.299251181934321	-0.401497636131359	0.728503961548531	0.457007923097063	Tue Mar 1 16:21:04 2022
14.6130681077814	s12	333	WTA_gordon	glm7	sc1	sc2	sess	True	True	gordon	cerebellum_suit	crossed	all	True	0.1	0.236871754126276	-1991.40773454326	0.24555591625875	-0.5088881674825	0.589089390465542	0.178178780931084	Tue Mar 1 16:21:06 2022
9.90376606113092	s14	333	WTA_gordon	glm7	sc1	sc2	sess	True	True	gordon	cerebellum_suit	crossed	all	True	0.1	0.117192056527834	-1206.15572448286	0.333939338007503	-0.332121323984993	0.762103098169671	0.524206196339341	Tue Mar 1 16:21:07 2022
12.4730072867471	s15	333	WTA_gordon	glm7	sc1	sc2	sess	True	True	gordon	cerebellum_suit	crossed	all	True	0.1	0.282687367949132	-1451.97904010064	0.281911854547391	-0.436176290905218	0.629191119550206	0.258382239100413	Tue Mar 1 16:21:09 2022
15.7550404324582	s17	333	WTA_gordon	glm7	sc1	sc2	sess	True	True	gordon	cerebellum_suit	crossed	all	True	0.1	0.362181979448331	-2033.00135321443	0.403711442324702	-0.192577115350598	0.69356106848135	0.3871221369627	Tue Mar 1 16:21:11 2022
9.89732238043182	s18	333	WTA_gordon	glm7	sc1	sc2	sess	True	True	gordon	cerebellum_suit	crossed	all	True	0.1	0.156337885115832	-1370.71364835701	0.215557982278809	-0.568884035442381	0.61022007987904	0.22044015975808	Tue Mar 1 16:21:12 2022
8.81861235381783	s19	333	WTA_gordon	glm7	sc1	sc2	sess	True	True	gordon	cerebellum_suit	crossed	all	True	0.1	0.216116297678429	-1162.16879764382	0.254240109492353	-0.491519781015295	0.55466126768624	0.10932253537248	Tue Mar 1 16:21:14 2022
15.264056100027	s20	333	WTA_gordon	glm7	sc1	sc2	sess	True	True	gordon	cerebellum_suit	crossed	all	True	0.1	0.264502497349321	-2127.96618109744	0.325037423570484	-0.349925152859032	0.48460915243694	-0.03078169512612	Tue Mar 1 16:21:16 2022
12.628248968655	s21	333	WTA_gordon	glm7	sc1	sc2	sess	True	True	gordon	cerebellum_suit	crossed	all	True	0.1	0.100750189941076	-1772.82930589547	0.195871779559683	-0.608256440880633	0.28046652296645	-0.439066954067099	Tue Mar 1 16:21:17 2022
16.4122482041431	s22	333	WTA_gordon	glm7	sc1	sc2	sess	True	True	gordon	cerebellum_suit	crossed	all	True	0.1	0.406650977230945	-2798.63625125293	0.445329703945649	-0.109340592108703	0.721771068340258	0.443542136680515	Tue Mar 1 16:21:19 2022
14.0939281140683	s24	333	WTA_gordon	glm7	sc1	sc2	sess	True	True	gordon	cerebellum_suit	crossed	all	True	0.1	0.142076215801027	-1725.74304464244	0.206192914360851	-0.587614171278299	0.544775335790617	0.089550671581235	Tue Mar 1 16:21:21 2022
13.3715634588227	s25	333	WTA_gordon	glm7	sc1	sc2	sess	True	True	gordon	cerebellum_suit	crossed	all	True	0.1	0.241859207454711	-2053.71387769916	0.280142802216838	-0.439714395566324	0.587699927941034	0.175399855882068	Tue Mar 1 16:21:22 2022
14.0030087552405	s26	333	WTA_gordon	glm7	sc1	sc2	sess	True	True	gordon	cerebellum_suit	crossed	all	True	0.1	0.271378650716036	-2194.94008098232	0.379621975955543	-0.240756048088914	0.501801179636153	0.003602359272306	Tue Mar 1 16:21:24 2022
14.0840196067705	s27	333	WTA_gordon	glm7	sc1	sc2	sess	True	True	gordon	cerebellum_suit	crossed	all	True	0.1	0.274879774807815	-1990.4639405657	0.361738248230639	-0.276523503538723	0.589228598726096	0.178457197452191	Tue Mar 1 16:21:25 2022
11.2619194736084	s28	333	WTA_gordon	glm7	sc1	sc2	sess	True	True	gordon	cerebellum_suit	crossed	all	True	0.1	0.146774408142435	-1240.41498665705	0.187533468804654	-0.624933062390691	0.457254009874094	-0.085491980251812	Tue Mar 1 16:21:26 2022
17.7017497741954	s29	333	WTA_gordon	glm7	sc1	sc2	sess	True	True	gordon	cerebellum_suit	crossed	all	True	0.1	0.180912921325847	-1909.82448978322	0.208071450849161	-0.583857098301678	0.463075596432365	-0.073848807135269	Tue Mar 1 16:21:28 2022
15.5220018520085	s30	333	WTA_gordon	glm7	sc1	sc2	sess	True	True	gordon	cerebellum_suit	crossed	all	True	0.1	0.099223179634167	-1601.9572249837	0.070360485085245	-0.859279029829511	0.43235887286323	-0.135282254273541	Tue Mar 1 16:21:30 2022
12.5793946962057	s31	333	WTA_gordon	glm7	sc1	sc2	sess	True	True	gordon	cerebellum_suit	crossed	all	True	0.1	0.124574683931876	-1466.98704775933	0.113204759286153	-0.773590481427694	0.433881457655356	-0.132237084689287	Tue Mar 1 16:21:31 2022
10.8840480483423	s02	210	WTA_fan	glm7	sc1	sc2	sess	True	True	fan	cerebellum_suit	crossed	all	True	0.1	0.219230515748624	-1757.79583955701	0.250541465626943	-0.498917068746113	0.529274534717839	0.058549069435678	Tue Mar 1 16:20:13 2022
11.8620233283139	s03	210	WTA_fan	glm7	sc1	sc2	sess	True	True	fan	cerebellum_suit	crossed	all	True	0.1	0.284569368277679	-2050.07883420373	0.269163903291232	-0.461672193417536	0.60739808405943	0.21479616811886	Tue Mar 1 16:20:15 2022
11.5219528817136	s04	210	WTA_fan	glm7	sc1	sc2	sess	True	True	fan	cerebellum_suit	crossed	all	True	0.1	0.068829045586871	-1494.92713302542	0.129791907993994	-0.740416184012013	0.402932547416089	-0.194134905167823	Tue Mar 1 16:20:16 2022
11.0344242471788	s06	210	WTA_fan	glm7	sc1	sc2	sess	True	True	fan	cerebellum_suit	crossed	all	True	0.1	0.395745993799065	-1881.27163000408	0.438928642287505	-0.12214271542499	0.777366540189527	0.554733080379053	Tue Mar 1 16:20:18 2022
11.1180155022536	s08	210	WTA_fan	glm7	sc1	sc2	sess	True	True	fan	cerebellum_suit	crossed	all	True	0.1	0.196775603942151	-1267.82545380546	0.216358495364167	-0.567283009271665	0.502166387445845	0.00433277489169	Tue Mar 1 16:20:19 2022
11.9354485020762	s09	210	WTA_fan	glm7	sc1	sc2	sess	True	True	fan	cerebellum_suit	crossed	all	True	0.1	0.279786128405942	-1403.30798188962	0.372356589815305	-0.255286820369391	0.642172232729691	0.284344465459382	Tue Mar 1 16:20:21 2022
11.3550224172627	s10	210	WTA_fan	glm7	sc1	sc2	sess	True	True	fan	cerebellum_suit	crossed	all	True	0.1	0.330652632877752	-1756.44330046412	0.299251181934321	-0.401497636131359	0.751008214504058	0.502016429008117	Tue Mar 1 16:20:23 2022
12.8816285071722	s12	210	WTA_fan	glm7	sc1	sc2	sess	True	True	fan	cerebellum_suit	crossed	all	True	0.1	0.222235211200842	-1606.60669031705	0.24555591625875	-0.5088881674825	0.596058291949103	0.192116583898206	Tue Mar 1 16:20:24 2022
9.52507293534305	s14	210	WTA_fan	glm7	sc1	sc2	sess	True	True	fan	cerebellum_suit	crossed	all	True	0.1	0.124637868327631	-1135.28247867115	0.333939338007503	-0.332121323984993	0.776144621902915	0.55228924380583	Tue Mar 1 16:20:26 2022
11.8922529156884	s15	210	WTA_fan	glm7	sc1	sc2	sess	True	True	fan	cerebellum_suit	crossed	all	True	0.1	0.272518007284012	-1377.90579217818	0.281911854547391	-0.436176290905218	0.625393625652027	0.250787251304054	Tue Mar 1 16:20:27 2022
15.2492936123507	s17	210	WTA_fan	glm7	sc1	sc2	sess	True	True	fan	cerebellum_suit	crossed	all	True	0.1	0.363151243253085	-1928.88415355601	0.403711442324702	-0.192577115350598	0.686519956706388	0.373039913412776	Tue Mar 1 16:20:29 2022
9.10994005108894	s18	210	WTA_fan	glm7	sc1	sc2	sess	True	True	fan	cerebellum_suit	crossed	all	True	0.1	0.169711080347609	-1173.66521940166	0.215557982278809	-0.568884035442381	0.614575902136341	0.229151804272682	Tue Mar 1 16:20:30 2022
7.9809598886893	s19	210	WTA_fan	glm7	sc1	sc2	sess	True	True	fan	cerebellum_suit	crossed	all	True	0.1	0.195392798815015	-965.336038034396	0.254240109492353	-0.491519781015295	0.521580069193355	0.04316013838671	Tue Mar 1 16:20:32 2022
14.1449411008446	s20	210	WTA_fan	glm7	sc1	sc2	sess	True	True	fan	cerebellum_suit	crossed	all	True	0.1	0.264961915680134	-1880.49393094431	0.325037423570484	-0.349925152859032	0.484348649500375	-0.031302700999251	Tue Mar 1 16:20:33 2022
12.0435766548604	s21	210	WTA_fan	glm7	sc1	sc2	sess	True	True	fan	cerebellum_suit	crossed	all	True	0.1	0.11048061094006	-1644.39670604982	0.195871779559683	-0.608256440880633	0.292282884358492	-0.415434231283015	Tue Mar 1 16:20:35 2022
15.728014964145	s22	210	WTA_fan	glm7	sc1	sc2	sess	True	True	fan	cerebellum_suit	crossed	all	True	0.1	0.412266854224874	-2662.52932296878	0.445329703945649	-0.109340592108703	0.728578449434657	0.457156898869314	Tue Mar 1 16:20:36 2022
13.4856379530848	s24	210	WTA_fan	glm7	sc1	sc2	sess	True	True	fan	cerebellum_suit	crossed	all	True	0.1	0.141058964608808	-1611.68090128524	0.206192914360851	-0.587614171278299	0.52948054444602	0.05896108889204	Tue Mar 1 16:20:38 2022
12.3392202909862	s25	210	WTA_fan	glm7	sc1	sc2	sess	True	True	fan	cerebellum_suit	crossed	all	True	0.1	0.238000649161612	-1814.55994763387	0.280142802216838	-0.439714395566324	0.5545117783149	0.1090235566298	Tue Mar 1 16:20:39 2022
12.5136606202743	s26	210	WTA_fan	glm7	sc1	sc2	sess	True	True	fan	cerebellum_suit	crossed	all	True	0.1	0.258989596412764	-1771.9660217785	0.379621975955543	-0.240756048088914	0.480777132584111	-0.038445734831778	Tue Mar 1 16:20:41 2022
13.4965161049867	s27	210	WTA_fan	glm7	sc1	sc2	sess	True	True	fan	cerebellum_suit	crossed	all	True	0.1	0.268216791401792	-1886.36825240331	0.361738248230639	-0.276523503538723	0.569849028610882	0.139698057221765	Tue Mar 1 16:20:42 2022
10.0102846415223	s28	210	WTA_fan	glm7	sc1	sc2	sess	True	True	fan	cerebellum_suit	crossed	all	True	0.1	0.148748137622792	-1007.29062714505	0.187533468804654	-0.624933062390691	0.466032664971107	-0.067934670057785	Tue Mar 1 16:20:44 2022
16.3831550060071	s29	210	WTA_fan	glm7	sc1	sc2	sess	True	True	fan	cerebellum_suit	crossed	all	True	0.1	0.162947524203436	-1680.81694501882	0.208071450849161	-0.583857098301678	0.400648665100499	-0.198702669799002	Tue Mar 1 16:20:45 2022
15.103371568123	s30	210	WTA_fan	glm7	sc1	sc2	sess	True	True	fan	cerebellum_suit	crossed	all	True	0.1	0.089499108243328	-1548.49190581056	0.070360485085245	-0.859279029829511	0.38973599644901	-0.22052800710198	Tue Mar 1 16:20:47 2022
11.849270998064	s31	210	WTA_fan	glm7	sc1	sc2	sess	True	True	fan	cerebellum_suit	crossed	all	True	0.1	0.124790971430816	-1316.76880359175	0.113204759286153	-0.773590481427694	0.442966595203989	-0.114066809592022	Tue Mar 1 16:20:48 2022
9.54700852676551	s02	50	WTA_arslan_50	glm7	sc1	sc2	sess	True	True	arslan_50	cerebellum_suit	crossed	all	True	0.1	0.202198669386219	-1426.60450250453	0.250541465626943	-0.498917068746113	0.565957802149845	0.13191560429969	Tue Mar 1 16:15:28 2022
9.99497493350323	s03	50	WTA_arslan_50	glm7	sc1	sc2	sess	True	True	arslan_50	cerebellum_suit	crossed	all	True	0.1	0.266050279690017	-1564.45921240368	0.269163903291232	-0.461672193417536	0.627737257694533	0.255474515389065	Tue Mar 1 16:15:29 2022
9.72091689910324	s04	50	WTA_arslan_50	glm7	sc1	sc2	sess	True	True	arslan_50	cerebellum_suit	crossed	all	True	0.1	0.090022610234644	-1144.60525077187	0.129791907993994	-0.740416184012013	0.504243866525745	0.00848773305149	Tue Mar 1 16:15:31 2022
10.553457419489	s06	50	WTA_arslan_50	glm7	sc1	sc2	sess	True	True	arslan_50	cerebellum_suit	crossed	all	True	0.1	0.387695936496306	-1665.17975979984	0.438928642287505	-0.12214271542499	0.769371703325399	0.538743406650798	Tue Mar 1 16:15:32 2022
8.47088754545817	s08	50	WTA_arslan_50	glm7	sc1	sc2	sess	True	True	arslan_50	cerebellum_suit	crossed	all	True	0.1	0.239172026865576	-786.615505473469	0.216358495364167	-0.567283009271665	0.579747393336646	0.159494786673293	Tue Mar 1 16:15:33 2022
10.5916859485111	s09	50	WTA_arslan_50	glm7	sc1	sc2	sess	True	True	arslan_50	cerebellum_suit	crossed	all	True	0.1	0.270924825741906	-1218.01637231728	0.372356589815305	-0.255286820369391	0.679705400582738	0.359410801165476	Tue Mar 1 16:15:35 2022
9.85965476832961	s10	50	WTA_arslan_50	glm7	sc1	sc2	sess	True	True	arslan_50	cerebellum_suit	crossed	all	True	0.1	0.316177374404869	-1443.73824915094	0.299251181934321	-0.401497636131359	0.748017642438055	0.496035284876111	Tue Mar 1 16:15:36 2022
11.3524809029658	s12	50	WTA_arslan_50	glm7	sc1	sc2	sess	True	True	arslan_50	cerebellum_suit	crossed	all	True	0.1	0.237880605050473	-1411.47289011936	0.24555591625875	-0.5088881674825	0.73697015265683	0.473940305313661	Tue Mar 1 16:15:38 2022
8.27659077490273	s14	50	WTA_arslan_50	glm7	sc1	sc2	sess	True	True	arslan_50	cerebellum_suit	crossed	all	True	0.1	0.142254563205006	-899.567297292671	0.333939338007503	-0.332121323984993	0.781867637895688	0.563735275791375	Tue Mar 1 16:15:39 2022
10.3865240017862	s15	50	WTA_arslan_50	glm7	sc1	sc2	sess	True	True	arslan_50	cerebellum_suit	crossed	all	True	0.1	0.280551891355236	-1093.32432910514	0.281911854547391	-0.436176290905218	0.664660495799742	0.329320991599483	Tue Mar 1 16:15:41 2022
13.4757585528042	s17	50	WTA_arslan_50	glm7	sc1	sc2	sess	True	True	arslan_50	cerebellum_suit	crossed	all	True	0.1	0.3423775282917	-1586.47592340042	0.403711442324702	-0.192577115350598	0.681588224898563	0.363176449797125	Tue Mar 1 16:15:43 2022
7.79987206833788	s18	50	WTA_arslan_50	glm7	sc1	sc2	sess	True	True	arslan_50	cerebellum_suit	crossed	all	True	0.1	0.165070761953629	-898.297872839517	0.215557982278809	-0.568884035442381	0.63663839507356	0.27327679014712	Tue Mar 1 16:15:44 2022
7.27236578811909	s19	50	WTA_arslan_50	glm7	sc1	sc2	sess	True	True	arslan_50	cerebellum_suit	crossed	all	True	0.1	0.20554778853479	-837.667672986408	0.254240109492353	-0.491519781015295	0.576179534655646	0.152359069311291	Tue Mar 1 16:15:46 2022
12.6829600883078	s20	50	WTA_arslan_50	glm7	sc1	sc2	sess	True	True	arslan_50	cerebellum_suit	crossed	all	True	0.1	0.241157788178366	-1565.09906375566	0.325037423570484	-0.349925152859032	0.46727484552586	-0.065450308948281	Tue Mar 1 16:15:47 2022
8.94848432594677	s21	50	WTA_arslan_50	glm7	sc1	sc2	sess	True	True	arslan_50	cerebellum_suit	crossed	all	True	0.1	0.11901974747136	-992.228036637467	0.195871779559683	-0.608256440880633	0.335614375341006	-0.328771249317989	Tue Mar 1 16:15:49 2022
13.9408712864393	s22	50	WTA_arslan_50	glm7	sc1	sc2	sess	True	True	arslan_50	cerebellum_suit	crossed	all	True	0.1	0.395899663513864	-2309.73864620324	0.445329703945649	-0.109340592108703	0.741456129404486	0.482912258808972	Tue Mar 1 16:15:50 2022
11.4064145013457	s24	50	WTA_arslan_50	glm7	sc1	sc2	sess	True	True	arslan_50	cerebellum_suit	crossed	all	True	0.1	0.131153182839709	-1255.49929809632	0.206192914360851	-0.587614171278299	0.515410460165539	0.030820920331078	Tue Mar 1 16:15:51 2022
11.081666588862	s25	50	WTA_arslan_50	glm7	sc1	sc2	sess	True	True	arslan_50	cerebellum_suit	crossed	all	True	0.1	0.231241496335331	-1559.2825924382	0.280142802216838	-0.439714395566324	0.562023267565124	0.124046535130249	Tue Mar 1 16:15:53 2022
11.1239778368668	s26	50	WTA_arslan_50	glm7	sc1	sc2	sess	True	True	arslan_50	cerebellum_suit	crossed	all	True	0.1	0.201869173223559	-1439.01963241462	0.379621975955543	-0.240756048088914	0.431831727690129	-0.136336544619741	Tue Mar 1 16:15:54 2022
11.8556615727522	s27	50	WTA_arslan_50	glm7	sc1	sc2	sess	True	True	arslan_50	cerebellum_suit	crossed	all	True	0.1	0.266086462396801	-1550.65468108828	0.361738248230639	-0.276523503538723	0.606982560945849	0.213965121891697	Tue Mar 1 16:15:56 2022
7.66387619528007	s28	50	WTA_arslan_50	glm7	sc1	sc2	sess	True	True	arslan_50	cerebellum_suit	crossed	all	True	0.1	0.143444612689263	-618.97154302561	0.187533468804654	-0.624933062390691	0.527606289874247	0.055212579748494	Tue Mar 1 16:15:57 2022
14.7978938410819	s29	50	WTA_arslan_50	glm7	sc1	sc2	sess	True	True	arslan_50	cerebellum_suit	crossed	all	True	0.1	0.144698619396247	-1469.21792147174	0.208071450849161	-0.583857098301678	0.341989750021357	-0.316020499957287	Tue Mar 1 16:15:59 2022
12.3515741898433	s30	50	WTA_arslan_50	glm7	sc1	sc2	sess	True	True	arslan_50	cerebellum_suit	crossed	all	True	0.1	0.093034529853008	-1107.75237264545	0.070360485085245	-0.859279029829511	0.440853899862368	-0.118292200275264	Tue Mar 1 16:16:00 2022
9.6383806225888	s31	50	WTA_arslan_50	glm7	sc1	sc2	sess	True	True	arslan_50	cerebellum_suit	crossed	all	True	0.1	0.104288521388437	-885.732587831861	0.113204759286153	-0.773590481427694	0.410544318074962	-0.178911363850075	Tue Mar 1 16:16:01 2022
10.8670652920926	s02	250	WTA_arslan_250	glm7	sc1	sc2	sess	True	True	arslan_250	cerebellum_suit	crossed	all	True	0.1	0.228648964598397	-1744.55285853734	0.250541465626943	-0.498917068746113	0.545905048814436	0.091810097628871	Tue Mar 1 16:17:29 2022
12.3695161489328	s03	250	WTA_arslan_250	glm7	sc1	sc2	sess	True	True	arslan_250	cerebellum_suit	crossed	all	True	0.1	0.284204258209723	-2143.92506287433	0.269163903291232	-0.461672193417536	0.64389896348095	0.2877979269619	Tue Mar 1 16:17:31 2022
11.8084275580437	s04	250	WTA_arslan_250	glm7	sc1	sc2	sess	True	True	arslan_250	cerebellum_suit	crossed	all	True	0.1	0.078658986393164	-1668.54819219613	0.129791907993994	-0.740416184012013	0.497187964881527	-0.005624070236947	Tue Mar 1 16:17:32 2022
11.9314944591375	s06	250	WTA_arslan_250	glm7	sc1	sc2	sess	True	True	arslan_250	cerebellum_suit	crossed	all	True	0.1	0.393264397876558	-1955.53311820107	0.438928642287505	-0.12214271542499	0.763563002056331	0.527126004112662	Tue Mar 1 16:17:34 2022
11.0657995446547	s08	250	WTA_arslan_250	glm7	sc1	sc2	sess	True	True	arslan_250	cerebellum_suit	crossed	all	True	0.1	0.218801902628642	-1259.24954789861	0.216358495364167	-0.567283009271665	0.529333805469677	0.058667610939354	Tue Mar 1 16:17:35 2022
12.1944809038747	s09	250	WTA_arslan_250	glm7	sc1	sc2	sess	True	True	arslan_250	cerebellum_suit	crossed	all	True	0.1	0.293439564941343	-1460.62132118138	0.372356589815305	-0.255286820369391	0.678243902529425	0.356487805058851	Tue Mar 1 16:17:37 2022
11.8744610810821	s10	250	WTA_arslan_250	glm7	sc1	sc2	sess	True	True	arslan_250	cerebellum_suit	crossed	all	True	0.1	0.326035244876432	-1882.6001019672	0.299251181934321	-0.401497636131359	0.751506736761873	0.503013473523747	Tue Mar 1 16:17:38 2022
13.0948015950044	s12	250	WTA_arslan_250	glm7	sc1	sc2	sess	True	True	arslan_250	cerebellum_suit	crossed	all	True	0.1	0.259029325210072	-1657.92369837121	0.24555591625875	-0.5088881674825	0.719561736786699	0.439123473573398	Tue Mar 1 16:17:40 2022
9.89593750973857	s14	250	WTA_arslan_250	glm7	sc1	sc2	sess	True	True	arslan_250	cerebellum_suit	crossed	all	True	0.1	0.117110111073614	-1290.98350497751	0.333939338007503	-0.332121323984993	0.776904573155907	0.553809146311814	Tue Mar 1 16:17:42 2022
12.3180516293988	s15	250	WTA_arslan_250	glm7	sc1	sc2	sess	True	True	arslan_250	cerebellum_suit	crossed	all	True	0.1	0.279897464895312	-1455.21183117089	0.281911854547391	-0.436176290905218	0.653005668215552	0.306011336431103	Tue Mar 1 16:17:43 2022
15.1675375338516	s17	250	WTA_arslan_250	glm7	sc1	sc2	sess	True	True	arslan_250	cerebellum_suit	crossed	all	True	0.1	0.372737643681209	-1910.24234494544	0.403711442324702	-0.192577115350598	0.710616252098651	0.421232504197301	Tue Mar 1 16:17:45 2022
9.88086885206533	s18	250	WTA_arslan_250	glm7	sc1	sc2	sess	True	True	arslan_250	cerebellum_suit	crossed	all	True	0.1	0.160232634401806	-1388.96232069036	0.215557982278809	-0.568884035442381	0.652177474288411	0.304354948576822	Tue Mar 1 16:17:47 2022
8.62952005741083	s19	250	WTA_arslan_250	glm7	sc1	sc2	sess	True	True	arslan_250	cerebellum_suit	crossed	all	True	0.1	0.226916819612641	-1132.83986396195	0.254240109492353	-0.491519781015295	0.590452314865528	0.180904629731055	Tue Mar 1 16:17:48 2022
14.4710284320632	s20	250	WTA_arslan_250	glm7	sc1	sc2	sess	True	True	arslan_250	cerebellum_suit	crossed	all	True	0.1	0.259649820959409	-1930.39462195172	0.325037423570484	-0.349925152859032	0.487741085643224	-0.024517828713552	Tue Mar 1 16:17:50 2022
13.4431144964258	s21	250	WTA_arslan_250	glm7	sc1	sc2	sess	True	True	arslan_250	cerebellum_suit	crossed	all	True	0.1	0.106523979303121	-2043.7033112038	0.195871779559683	-0.608256440880633	0.251876860793872	-0.496246278412256	Tue Mar 1 16:17:51 2022
15.9849301543171	s22	250	WTA_arslan_250	glm7	sc1	sc2	sess	True	True	arslan_250	cerebellum_suit	crossed	all	True	0.1	0.4142635835677	-2621.92503552275	0.445329703945649	-0.109340592108703	0.739417743279477	0.478835486558954	Tue Mar 1 16:17:53 2022
13.5195742356107	s24	250	WTA_arslan_250	glm7	sc1	sc2	sess	True	True	arslan_250	cerebellum_suit	crossed	all	True	0.1	0.152700210400726	-1607.78233101617	0.206192914360851	-0.587614171278299	0.577449092056403	0.154898184112805	Tue Mar 1 16:17:55 2022
12.8905172318648	s25	250	WTA_arslan_250	glm7	sc1	sc2	sess	True	True	arslan_250	cerebellum_suit	crossed	all	True	0.1	0.249713495091974	-1968.41355434048	0.280142802216838	-0.439714395566324	0.588480995520849	0.176961991041698	Tue Mar 1 16:17:56 2022
13.1519556088102	s26	250	WTA_arslan_250	glm7	sc1	sc2	sess	True	True	arslan_250	cerebellum_suit	crossed	all	True	0.1	0.253221010155083	-1915.20446518594	0.379621975955543	-0.240756048088914	0.501968509329511	0.003937018659022	Tue Mar 1 16:17:57 2022
13.6875432919769	s27	250	WTA_arslan_250	glm7	sc1	sc2	sess	True	True	arslan_250	cerebellum_suit	crossed	all	True	0.1	0.279190952762038	-1909.91563631209	0.361738248230639	-0.276523503538723	0.613172569937306	0.226345139874611	Tue Mar 1 16:17:59 2022
10.3420918625268	s28	250	WTA_arslan_250	glm7	sc1	sc2	sess	True	True	arslan_250	cerebellum_suit	crossed	all	True	0.1	0.162472372001611	-1106.7613196437	0.187533468804654	-0.624933062390691	0.534758892546781	0.069517785093563	Tue Mar 1 16:18:00 2022
17.1470658179579	s29	250	WTA_arslan_250	glm7	sc1	sc2	sess	True	True	arslan_250	cerebellum_suit	crossed	all	True	0.1	0.164293051795781	-1785.27300248271	0.208071450849161	-0.583857098301678	0.395730719759041	-0.208538560481917	Tue Mar 1 16:18:02 2022
14.960263764372	s30	250	WTA_arslan_250	glm7	sc1	sc2	sess	True	True	arslan_250	cerebellum_suit	crossed	all	True	0.1	0.099407109198437	-1508.06487872438	0.070360485085245	-0.859279029829511	0.453303330676686	-0.093393338646628	Tue Mar 1 16:18:03 2022
12.0669779971864	s31	250	WTA_arslan_250	glm7	sc1	sc2	sess	True	True	arslan_250	cerebellum_suit	crossed	all	True	0.1	0.130946149736675	-1327.25931735587	0.113204759286153	-0.773590481427694	0.493211693912702	-0.013576612174596	Tue Mar 1 16:18:05 2022
10.8205995001952	s02	200	WTA_arslan_200	glm7	sc1	sc2	sess	True	True	arslan_200	cerebellum_suit	crossed	all	True	0.1	0.231109972517078	-1738.78840655306	0.250541465626943	-0.498917068746113	0.553446726014808	0.106893452029615	Tue Mar 1 16:16:48 2022
11.8433650970259	s03	200	WTA_arslan_200	glm7	sc1	sc2	sess	True	True	arslan_200	cerebellum_suit	crossed	all	True	0.1	0.295818028026718	-1979.94114758161	0.269163903291232	-0.461672193417536	0.647823604442486	0.295647208884972	Tue Mar 1 16:16:49 2022
11.2476081181333	s04	200	WTA_arslan_200	glm7	sc1	sc2	sess	True	True	arslan_200	cerebellum_suit	crossed	all	True	0.1	0.081092925439461	-1519.15998087215	0.129791907993994	-0.740416184012013	0.498124767027439	-0.003750465945122	Tue Mar 1 16:16:51 2022
11.6762665947017	s06	200	WTA_arslan_200	glm7	sc1	sc2	sess	True	True	arslan_200	cerebellum_suit	crossed	all	True	0.1	0.399948866538586	-1906.76935928889	0.438928642287505	-0.12214271542499	0.772860050556163	0.545720101112327	Tue Mar 1 16:16:52 2022
10.4779461075086	s08	200	WTA_arslan_200	glm7	sc1	sc2	sess	True	True	arslan_200	cerebellum_suit	crossed	all	True	0.1	0.222377362919623	-1144.4893080484	0.216358495364167	-0.567283009271665	0.56675114729451	0.133502294589021	Tue Mar 1 16:16:54 2022
11.9414176009874	s09	200	WTA_arslan_200	glm7	sc1	sc2	sess	True	True	arslan_200	cerebellum_suit	crossed	all	True	0.1	0.290450342295248	-1419.82971327302	0.372356589815305	-0.255286820369391	0.677895974777192	0.355791949554385	Tue Mar 1 16:16:55 2022
11.6846720022562	s10	200	WTA_arslan_200	glm7	sc1	sc2	sess	True	True	arslan_200	cerebellum_suit	crossed	all	True	0.1	0.326980521628837	-1837.23278062022	0.299251181934321	-0.401497636131359	0.752272408006793	0.504544816013586	Tue Mar 1 16:16:57 2022
12.7465545276441	s12	200	WTA_arslan_200	glm7	sc1	sc2	sess	True	True	arslan_200	cerebellum_suit	crossed	all	True	0.1	0.247877829034244	-1582.93790184221	0.24555591625875	-0.5088881674825	0.696334191191042	0.392668382382084	Tue Mar 1 16:16:58 2022
9.62316066596281	s14	200	WTA_arslan_200	glm7	sc1	sc2	sess	True	True	arslan_200	cerebellum_suit	crossed	all	True	0.1	0.122434652013335	-1213.25888223082	0.333939338007503	-0.332121323984993	0.782063525812191	0.564127051624382	Tue Mar 1 16:17:00 2022
11.8892224287237	s15	200	WTA_arslan_200	glm7	sc1	sc2	sess	True	True	arslan_200	cerebellum_suit	crossed	all	True	0.1	0.284171396910174	-1364.37007539809	0.281911854547391	-0.436176290905218	0.663475072913952	0.326950145827905	Tue Mar 1 16:17:01 2022
15.1926184511236	s17	200	WTA_arslan_200	glm7	sc1	sc2	sess	True	True	arslan_200	cerebellum_suit	crossed	all	True	0.1	0.37035631584928	-1951.69962977103	0.403711442324702	-0.192577115350598	0.706548415415622	0.413096830831245	Tue Mar 1 16:17:03 2022
9.48493719624358	s18	200	WTA_arslan_200	glm7	sc1	sc2	sess	True	True	arslan_200	cerebellum_suit	crossed	all	True	0.1	0.163892102523631	-1266.20714401542	0.215557982278809	-0.568884035442381	0.633437758240061	0.266875516480121	Tue Mar 1 16:17:05 2022
8.39455840673602	s19	200	WTA_arslan_200	glm7	sc1	sc2	sess	True	True	arslan_200	cerebellum_suit	crossed	all	True	0.1	0.218757642541884	-1059.21142647493	0.254240109492353	-0.491519781015295	0.596605512271257	0.193211024542515	Tue Mar 1 16:17:06 2022
14.2204510115274	s20	200	WTA_arslan_200	glm7	sc1	sc2	sess	True	True	arslan_200	cerebellum_suit	crossed	all	True	0.1	0.262847872650869	-1888.33832004486	0.325037423570484	-0.349925152859032	0.487435478746914	-0.025129042506172	Tue Mar 1 16:17:08 2022
13.1577855046059	s21	200	WTA_arslan_200	glm7	sc1	sc2	sess	True	True	arslan_200	cerebellum_suit	crossed	all	True	0.1	0.11315535227511	-1940.83995879764	0.195871779559683	-0.608256440880633	0.267638988392646	-0.464722023214707	Tue Mar 1 16:17:09 2022
15.9501340093493	s22	200	WTA_arslan_200	glm7	sc1	sc2	sess	True	True	arslan_200	cerebellum_suit	crossed	all	True	0.1	0.418421238230348	-2687.13585712209	0.445329703945649	-0.109340592108703	0.75085886283265	0.501717725665299	Tue Mar 1 16:17:11 2022
13.3275497987023	s24	200	WTA_arslan_200	glm7	sc1	sc2	sess	True	True	arslan_200	cerebellum_suit	crossed	all	True	0.1	0.151344169522417	-1579.46196446506	0.206192914360851	-0.587614171278299	0.588822430095213	0.177644860190426	Tue Mar 1 16:17:12 2022
12.7246735502984	s25	200	WTA_arslan_200	glm7	sc1	sc2	sess	True	True	arslan_200	cerebellum_suit	crossed	all	True	0.1	0.243557261514905	-1919.59751646811	0.280142802216838	-0.439714395566324	0.574116536069185	0.148233072138371	Tue Mar 1 16:17:14 2022
12.9163833069943	s26	200	WTA_arslan_200	glm7	sc1	sc2	sess	True	True	arslan_200	cerebellum_suit	crossed	all	True	0.1	0.264124755053284	-1859.13152242063	0.379621975955543	-0.240756048088914	0.502241848720047	0.004483697440095	Tue Mar 1 16:17:15 2022
13.3964019930856	s27	200	WTA_arslan_200	glm7	sc1	sc2	sess	True	True	arslan_200	cerebellum_suit	crossed	all	True	0.1	0.28568814290225	-1853.29345527619	0.361738248230639	-0.276523503538723	0.63173611965605	0.263472239312101	Tue Mar 1 16:17:17 2022
10.0359428116478	s28	200	WTA_arslan_200	glm7	sc1	sc2	sess	True	True	arslan_200	cerebellum_suit	crossed	all	True	0.1	0.162315112272144	-1038.36565197395	0.187533468804654	-0.624933062390691	0.536424565747512	0.072849131495024	Tue Mar 1 16:17:19 2022
17.0033771555465	s29	200	WTA_arslan_200	glm7	sc1	sc2	sess	True	True	arslan_200	cerebellum_suit	crossed	all	True	0.1	0.168826618198495	-1766.89081297422	0.208071450849161	-0.583857098301678	0.400251846312801	-0.199496307374398	Tue Mar 1 16:17:20 2022
14.3194333666329	s30	200	WTA_arslan_200	glm7	sc1	sc2	sess	True	True	arslan_200	cerebellum_suit	crossed	all	True	0.1	0.099759289139757	-1418.87550015297	0.070360485085245	-0.859279029829511	0.462541100925872	-0.074917798148255	Tue Mar 1 16:17:22 2022
11.6296978931972	s31	200	WTA_arslan_200	glm7	sc1	sc2	sess	True	True	arslan_200	cerebellum_suit	crossed	all	True	0.1	0.124091154395173	-1245.91350600533	0.113204759286153	-0.773590481427694	0.458678282505394	-0.082643434989211	Tue Mar 1 16:17:23 2022
10.3088587975338	s02	100	WTA_arslan_100	glm7	sc1	sc2	sess	True	True	arslan_100	cerebellum_suit	crossed	all	True	0.1	0.217328802928287	-1638.97206857767	0.250541465626943	-0.498917068746113	0.542283948244916	0.084567896489832	Tue Mar 1 16:16:07 2022
10.8822363756625	s03	100	WTA_arslan_100	glm7	sc1	sc2	sess	True	True	arslan_100	cerebellum_suit	crossed	all	True	0.1	0.277536260180121	-1742.84755234025	0.269163903291232	-0.461672193417536	0.650916235031329	0.301832470062659	Tue Mar 1 16:16:09 2022
10.3728486914501	s04	100	WTA_arslan_100	glm7	sc1	sc2	sess	True	True	arslan_100	cerebellum_suit	crossed	all	True	0.1	0.087885511601046	-1254.51009072808	0.129791907993994	-0.740416184012013	0.49056073314221	-0.01887853371558	Tue Mar 1 16:16:10 2022
11.2447246705288	s06	100	WTA_arslan_100	glm7	sc1	sc2	sess	True	True	arslan_100	cerebellum_suit	crossed	all	True	0.1	0.399522837739913	-1828.94590621089	0.438928642287505	-0.12214271542499	0.772642677115227	0.545285354230455	Tue Mar 1 16:16:11 2022
9.53690328412137	s08	100	WTA_arslan_100	glm7	sc1	sc2	sess	True	True	arslan_100	cerebellum_suit	crossed	all	True	0.1	0.227729583297342	-973.383044315326	0.216358495364167	-0.567283009271665	0.580196872912537	0.160393745825074	Tue Mar 1 16:16:13 2022
11.4101294691918	s09	100	WTA_arslan_100	glm7	sc1	sc2	sess	True	True	arslan_100	cerebellum_suit	crossed	all	True	0.1	0.286825683539364	-1334.32486490394	0.372356589815305	-0.255286820369391	0.687944079761158	0.375888159522317	Tue Mar 1 16:16:14 2022
10.7725709477662	s10	100	WTA_arslan_100	glm7	sc1	sc2	sess	True	True	arslan_100	cerebellum_suit	crossed	all	True	0.1	0.323361363731302	-1621.61508167927	0.299251181934321	-0.401497636131359	0.752247403906767	0.504494807813534	Tue Mar 1 16:16:15 2022
11.7662268075189	s12	100	WTA_arslan_100	glm7	sc1	sc2	sess	True	True	arslan_100	cerebellum_suit	crossed	all	True	0.1	0.24329015527468	-1415.05781979598	0.24555591625875	-0.5088881674825	0.708518247000425	0.417036494000849	Tue Mar 1 16:16:17 2022
9.34565702276102	s14	100	WTA_arslan_100	glm7	sc1	sc2	sess	True	True	arslan_100	cerebellum_suit	crossed	all	True	0.1	0.135369042655819	-1097.86849417129	0.333939338007503	-0.332121323984993	0.777941309756763	0.555882619513526	Tue Mar 1 16:16:18 2022
11.2196792227534	s15	100	WTA_arslan_100	glm7	sc1	sc2	sess	True	True	arslan_100	cerebellum_suit	crossed	all	True	0.1	0.277993299501378	-1249.39731736524	0.281911854547391	-0.436176290905218	0.66725379669862	0.334507593397241	Tue Mar 1 16:16:20 2022
14.4421334002071	s17	100	WTA_arslan_100	glm7	sc1	sc2	sess	True	True	arslan_100	cerebellum_suit	crossed	all	True	0.1	0.357264836491334	-1762.60608224149	0.403711442324702	-0.192577115350598	0.695012090150522	0.390024180301043	Tue Mar 1 16:16:21 2022
8.79537001952594	s18	100	WTA_arslan_100	glm7	sc1	sc2	sess	True	True	arslan_100	cerebellum_suit	crossed	all	True	0.1	0.1686336149948	-1118.55167975725	0.215557982278809	-0.568884035442381	0.649739635832647	0.299479271665294	Tue Mar 1 16:16:22 2022
7.88453674416645	s19	100	WTA_arslan_100	glm7	sc1	sc2	sess	True	True	arslan_100	cerebellum_suit	crossed	all	True	0.1	0.210471154362419	-963.136316138971	0.254240109492353	-0.491519781015295	0.568856560602783	0.137713121205566	Tue Mar 1 16:16:24 2022
13.7007465575744	s20	100	WTA_arslan_100	glm7	sc1	sc2	sess	True	True	arslan_100	cerebellum_suit	crossed	all	True	0.1	0.253955678180365	-1799.65135947724	0.325037423570484	-0.349925152859032	0.492615645663608	-0.014768708672784	Tue Mar 1 16:16:25 2022
10.6258882237039	s21	100	WTA_arslan_100	glm7	sc1	sc2	sess	True	True	arslan_100	cerebellum_suit	crossed	all	True	0.1	0.120696090694933	-1343.47602836175	0.195871779559683	-0.608256440880633	0.329852814661722	-0.340294370676555	Tue Mar 1 16:16:27 2022
15.060247945426	s22	100	WTA_arslan_100	glm7	sc1	sc2	sess	True	True	arslan_100	cerebellum_suit	crossed	all	True	0.1	0.411049416434099	-2511.92640553627	0.445329703945649	-0.109340592108703	0.749280403029801	0.498560806059601	Tue Mar 1 16:16:28 2022
12.5866251529948	s24	100	WTA_arslan_100	glm7	sc1	sc2	sess	True	True	arslan_100	cerebellum_suit	crossed	all	True	0.1	0.14203881955566	-1470.14675056348	0.206192914360851	-0.587614171278299	0.566500173305226	0.133000346610453	Tue Mar 1 16:16:30 2022
12.0298574365409	s25	100	WTA_arslan_100	glm7	sc1	sc2	sess	True	True	arslan_100	cerebellum_suit	crossed	all	True	0.1	0.242732901462448	-1783.63378364568	0.280142802216838	-0.439714395566324	0.576755963613403	0.153511927226806	Tue Mar 1 16:16:31 2022
11.9028215040946	s26	100	WTA_arslan_100	glm7	sc1	sc2	sess	True	True	arslan_100	cerebellum_suit	crossed	all	True	0.1	0.228514541431265	-1629.43802116822	0.379621975955543	-0.240756048088914	0.460699890119123	-0.078600219761754	Tue Mar 1 16:16:33 2022
12.5636766958437	s27	100	WTA_arslan_100	glm7	sc1	sc2	sess	True	True	arslan_100	cerebellum_suit	crossed	all	True	0.1	0.279305986239095	-1704.14507257597	0.361738248230639	-0.276523503538723	0.6298603560415	0.259720712083	Tue Mar 1 16:16:34 2022
8.75999182701712	s28	100	WTA_arslan_100	glm7	sc1	sc2	sess	True	True	arslan_100	cerebellum_suit	crossed	all	True	0.1	0.150288815525467	-794.135627198597	0.187533468804654	-0.624933062390691	0.517245458875291	0.034490917750583	Tue Mar 1 16:16:36 2022
15.749764225843	s29	100	WTA_arslan_100	glm7	sc1	sc2	sess	True	True	arslan_100	cerebellum_suit	crossed	all	True	0.1	0.161453160555543	-1564.17662739394	0.208071450849161	-0.583857098301678	0.397506155454322	-0.204987689091355	Tue Mar 1 16:16:37 2022
13.3934657800092	s30	100	WTA_arslan_100	glm7	sc1	sc2	sess	True	True	arslan_100	cerebellum_suit	crossed	all	True	0.1	0.093164858967506	-1263.39176164127	0.070360485085245	-0.859279029829511	0.422599966080845	-0.154800067838311	Tue Mar 1 16:16:39 2022
10.8429854262455	s31	100	WTA_arslan_100	glm7	sc1	sc2	sess	True	True	arslan_100	cerebellum_suit	crossed	all	True	0.1	0.126387630278027	-1128.08258343318	0.113204759286153	-0.773590481427694	0.451783415103103	-0.096433169793793	Tue Mar 1 16:16:40 2022
11.4225260720037	s02	300	WTA_Schaefer_7_300	glm7	sc1	sc2	sess	True	True	Schaefer_7_300	cerebellum_suit	crossed	all	True	0.1	0.234662331892894	-1929.75105863514	0.250541465626943	-0.498917068746113	0.559690259097429	0.119380518194858	Tue Mar 1 16:19:32 2022
12.1910580998471	s03	300	WTA_Schaefer_7_300	glm7	sc1	sc2	sess	True	True	Schaefer_7_300	cerebellum_suit	crossed	all	True	0.1	0.292948946359501	-2076.84203807497	0.269163903291232	-0.461672193417536	0.64276869211733	0.285537384234661	Tue Mar 1 16:19:33 2022
11.4412914589219	s04	300	WTA_Schaefer_7_300	glm7	sc1	sc2	sess	True	True	Schaefer_7_300	cerebellum_suit	crossed	all	True	0.1	0.085478502275704	-1525.74989685645	0.129791907993994	-0.740416184012013	0.492033552676541	-0.015932894646918	Tue Mar 1 16:19:35 2022
11.7698635286183	s06	300	WTA_Schaefer_7_300	glm7	sc1	sc2	sess	True	True	Schaefer_7_300	cerebellum_suit	crossed	all	True	0.1	0.395290438101058	-2016.10312589574	0.438928642287505	-0.12214271542499	0.763618290150906	0.527236580301812	Tue Mar 1 16:19:36 2022
11.657410967168	s08	300	WTA_Schaefer_7_300	glm7	sc1	sc2	sess	True	True	Schaefer_7_300	cerebellum_suit	crossed	all	True	0.1	0.207013154129888	-1391.91761742902	0.216358495364167	-0.567283009271665	0.532969885451952	0.065939770903904	Tue Mar 1 16:19:38 2022
12.6956983154158	s09	300	WTA_Schaefer_7_300	glm7	sc1	sc2	sess	True	True	Schaefer_7_300	cerebellum_suit	crossed	all	True	0.1	0.276996925907618	-1574.75757365849	0.372356589815305	-0.255286820369391	0.648635212704983	0.297270425409965	Tue Mar 1 16:19:39 2022
12.1224867504097	s10	300	WTA_Schaefer_7_300	glm7	sc1	sc2	sess	True	True	Schaefer_7_300	cerebellum_suit	crossed	all	True	0.1	0.328057009405798	-1919.4196933365	0.299251181934321	-0.401497636131359	0.743171725080639	0.486343450161277	Tue Mar 1 16:19:41 2022
13.8230022137027	s12	300	WTA_Schaefer_7_300	glm7	sc1	sc2	sess	True	True	Schaefer_7_300	cerebellum_suit	crossed	all	True	0.1	0.231498250194739	-1831.4589030815	0.24555591625875	-0.5088881674825	0.602088888629323	0.204177777258646	Tue Mar 1 16:19:42 2022
9.95423009344959	s14	300	WTA_Schaefer_7_300	glm7	sc1	sc2	sess	True	True	Schaefer_7_300	cerebellum_suit	crossed	all	True	0.1	0.123264752530198	-1279.14987749835	0.333939338007503	-0.332121323984993	0.783274551666503	0.566549103333006	Tue Mar 1 16:19:44 2022
12.595350338283	s15	300	WTA_Schaefer_7_300	glm7	sc1	sc2	sess	True	True	Schaefer_7_300	cerebellum_suit	crossed	all	True	0.1	0.280939414831416	-1538.17695244031	0.281911854547391	-0.436176290905218	0.644694206963907	0.289388413927814	Tue Mar 1 16:19:45 2022
15.4982002960547	s17	300	WTA_Schaefer_7_300	glm7	sc1	sc2	sess	True	True	Schaefer_7_300	cerebellum_suit	crossed	all	True	0.1	0.378449083291644	-1956.21575937531	0.403711442324702	-0.192577115350598	0.711622921875682	0.423245843751363	Tue Mar 1 16:19:47 2022
9.96969176455257	s18	300	WTA_Schaefer_7_300	glm7	sc1	sc2	sess	True	True	Schaefer_7_300	cerebellum_suit	crossed	all	True	0.1	0.159312007577028	-1401.22473243272	0.215557982278809	-0.568884035442381	0.643357361082758	0.286714722165515	Tue Mar 1 16:19:48 2022
8.7023797136809	s19	300	WTA_Schaefer_7_300	glm7	sc1	sc2	sess	True	True	Schaefer_7_300	cerebellum_suit	crossed	all	True	0.1	0.223081690898969	-1146.08727911506	0.254240109492353	-0.491519781015295	0.582372629662103	0.164745259324206	Tue Mar 1 16:19:50 2022
14.9079109884593	s20	300	WTA_Schaefer_7_300	glm7	sc1	sc2	sess	True	True	Schaefer_7_300	cerebellum_suit	crossed	all	True	0.1	0.266960073073541	-2057.07144022069	0.325037423570484	-0.349925152859032	0.504267416578151	0.008534833156301	Tue Mar 1 16:19:51 2022
12.1364540153708	s21	300	WTA_Schaefer_7_300	glm7	sc1	sc2	sess	True	True	Schaefer_7_300	cerebellum_suit	crossed	all	True	0.1	0.125698432749478	-1656.67716086166	0.195871779559683	-0.608256440880633	0.319919609536344	-0.360160780927312	Tue Mar 1 16:19:53 2022
16.206164490299	s22	300	WTA_Schaefer_7_300	glm7	sc1	sc2	sess	True	True	Schaefer_7_300	cerebellum_suit	crossed	all	True	0.1	0.418966073661436	-2789.91016218165	0.445329703945649	-0.109340592108703	0.757838484326354	0.515676968652708	Tue Mar 1 16:19:54 2022
13.8358805499646	s24	300	WTA_Schaefer_7_300	glm7	sc1	sc2	sess	True	True	Schaefer_7_300	cerebellum_suit	crossed	all	True	0.1	0.144723935257317	-1695.71446408997	0.206192914360851	-0.587614171278299	0.580663975000434	0.161327950000868	Tue Mar 1 16:19:56 2022
13.117171494599	s25	300	WTA_Schaefer_7_300	glm7	sc1	sc2	sess	True	True	Schaefer_7_300	cerebellum_suit	crossed	all	True	0.1	0.248632092354851	-2012.53789754041	0.280142802216838	-0.439714395566324	0.585037495249624	0.170074990499248	Tue Mar 1 16:19:57 2022
13.3612382910529	s26	300	WTA_Schaefer_7_300	glm7	sc1	sc2	sess	True	True	Schaefer_7_300	cerebellum_suit	crossed	all	True	0.1	0.266689658358146	-1994.26952999148	0.379621975955543	-0.240756048088914	0.510955402981444	0.021910805962888	Tue Mar 1 16:19:59 2022
13.9615218325914	s27	300	WTA_Schaefer_7_300	glm7	sc1	sc2	sess	True	True	Schaefer_7_300	cerebellum_suit	crossed	all	True	0.1	0.286371582754795	-1988.237806718	0.361738248230639	-0.276523503538723	0.617460141424757	0.234920282849514	Tue Mar 1 16:20:01 2022
10.6255510648062	s28	300	WTA_Schaefer_7_300	glm7	sc1	sc2	sess	True	True	Schaefer_7_300	cerebellum_suit	crossed	all	True	0.1	0.157415979349774	-1127.13436563854	0.187533468804654	-0.624933062390691	0.49001644556995	-0.0199671088601	Tue Mar 1 16:20:02 2022
17.5516332462099	s29	300	WTA_Schaefer_7_300	glm7	sc1	sc2	sess	True	True	Schaefer_7_300	cerebellum_suit	crossed	all	True	0.1	0.178577707779104	-1918.20035482973	0.208071450849161	-0.583857098301678	0.463876413806489	-0.072247172387021	Tue Mar 1 16:20:04 2022
15.0146098434442	s30	300	WTA_Schaefer_7_300	glm7	sc1	sc2	sess	True	True	Schaefer_7_300	cerebellum_suit	crossed	all	True	0.1	0.098776809931764	-1516.61231464293	0.070360485085245	-0.859279029829511	0.449949352007567	-0.100101295984866	Tue Mar 1 16:20:06 2022
12.2407964187447	s31	300	WTA_Schaefer_7_300	glm7	sc1	sc2	sess	True	True	Schaefer_7_300	cerebellum_suit	crossed	all	True	0.1	0.128672650651598	-1385.33202878184	0.113204759286153	-0.773590481427694	0.464317102041722	-0.071365795916556	Tue Mar 1 16:20:07 2022
10.9070189942808	s02	200	WTA_Schaefer_7_200	glm7	sc1	sc2	sess	True	True	Schaefer_7_200	cerebellum_suit	crossed	all	True	0.1	0.225070764074045	-1724.36879866675	0.250541465626943	-0.498917068746113	0.550977296338075	0.101954592676151	Tue Mar 1 16:18:50 2022
11.5816191205159	s03	200	WTA_Schaefer_7_200	glm7	sc1	sc2	sess	True	True	Schaefer_7_200	cerebellum_suit	crossed	all	True	0.1	0.291152910762468	-1906.59118508129	0.269163903291232	-0.461672193417536	0.646681166965973	0.293362333931946	Tue Mar 1 16:18:52 2022
11.1142556320317	s04	200	WTA_Schaefer_7_200	glm7	sc1	sc2	sess	True	True	Schaefer_7_200	cerebellum_suit	crossed	all	True	0.1	0.087841382129005	-1444.00797713444	0.129791907993994	-0.740416184012013	0.497037868279301	-0.005924263441398	Tue Mar 1 16:18:53 2022
11.2982123752141	s06	200	WTA_Schaefer_7_200	glm7	sc1	sc2	sess	True	True	Schaefer_7_200	cerebellum_suit	crossed	all	True	0.1	0.394353395688482	-1869.17581481937	0.438928642287505	-0.12214271542499	0.765327218290264	0.530654436580529	Tue Mar 1 16:18:55 2022
10.5167478970377	s08	200	WTA_Schaefer_7_200	glm7	sc1	sc2	sess	True	True	Schaefer_7_200	cerebellum_suit	crossed	all	True	0.1	0.219153728569998	-1147.7196213546	0.216358495364167	-0.567283009271665	0.549663505429955	0.09932701085991	Tue Mar 1 16:18:57 2022
12.1048006924456	s09	200	WTA_Schaefer_7_200	glm7	sc1	sc2	sess	True	True	Schaefer_7_200	cerebellum_suit	crossed	all	True	0.1	0.282812600093636	-1456.95845561847	0.372356589815305	-0.255286820369391	0.658203021577303	0.316406043154606	Tue Mar 1 16:18:58 2022
11.6572493580773	s10	200	WTA_Schaefer_7_200	glm7	sc1	sc2	sess	True	True	Schaefer_7_200	cerebellum_suit	crossed	all	True	0.1	0.331886849788073	-1814.67706398482	0.299251181934321	-0.401497636131359	0.741825730561666	0.483651461123332	Tue Mar 1 16:18:59 2022
12.7094494796012	s12	200	WTA_Schaefer_7_200	glm7	sc1	sc2	sess	True	True	Schaefer_7_200	cerebellum_suit	crossed	all	True	0.1	0.239481542138773	-1584.93157690814	0.24555591625875	-0.5088881674825	0.679440467149408	0.358880934298817	Tue Mar 1 16:19:01 2022
9.31274719208115	s14	200	WTA_Schaefer_7_200	glm7	sc1	sc2	sess	True	True	Schaefer_7_200	cerebellum_suit	crossed	all	True	0.1	0.117608085967225	-1129.31540411515	0.333939338007503	-0.332121323984993	0.77817602043322	0.556352040866439	Tue Mar 1 16:19:02 2022
12.6937706601155	s15	200	WTA_Schaefer_7_200	glm7	sc1	sc2	sess	True	True	Schaefer_7_200	cerebellum_suit	crossed	all	True	0.1	0.279800438379302	-1613.64013258628	0.281911854547391	-0.436176290905218	0.645691386304719	0.291382772609438	Tue Mar 1 16:19:04 2022
15.0292965793983	s17	200	WTA_Schaefer_7_200	glm7	sc1	sc2	sess	True	True	Schaefer_7_200	cerebellum_suit	crossed	all	True	0.1	0.370054047287439	-1839.9748301902	0.403711442324702	-0.192577115350598	0.696217194992162	0.392434389984325	Tue Mar 1 16:19:06 2022
9.42919705153763	s18	200	WTA_Schaefer_7_200	glm7	sc1	sc2	sess	True	True	Schaefer_7_200	cerebellum_suit	crossed	all	True	0.1	0.167739815849335	-1248.91741635929	0.215557982278809	-0.568884035442381	0.634884719739334	0.269769439478668	Tue Mar 1 16:19:07 2022
8.31801083350665	s19	200	WTA_Schaefer_7_200	glm7	sc1	sc2	sess	True	True	Schaefer_7_200	cerebellum_suit	crossed	all	True	0.1	0.217556064268619	-1052.64401936677	0.254240109492353	-0.491519781015295	0.571306605187846	0.142613210375693	Tue Mar 1 16:19:09 2022
14.499983228651	s20	200	WTA_Schaefer_7_200	glm7	sc1	sc2	sess	True	True	Schaefer_7_200	cerebellum_suit	crossed	all	True	0.1	0.266504731182711	-1962.03256760066	0.325037423570484	-0.349925152859032	0.501574355580876	0.003148711161751	Tue Mar 1 16:19:10 2022
11.9830567948227	s21	200	WTA_Schaefer_7_200	glm7	sc1	sc2	sess	True	True	Schaefer_7_200	cerebellum_suit	crossed	all	True	0.1	0.126215881788059	-1625.48308088869	0.195871779559683	-0.608256440880633	0.310549063627229	-0.378901872745542	Tue Mar 1 16:19:11 2022
15.8776901740394	s22	200	WTA_Schaefer_7_200	glm7	sc1	sc2	sess	True	True	Schaefer_7_200	cerebellum_suit	crossed	all	True	0.1	0.416790330981569	-2678.60518506132	0.445329703945649	-0.109340592108703	0.744499868802771	0.488999737605542	Tue Mar 1 16:19:13 2022
13.2502233162733	s24	200	WTA_Schaefer_7_200	glm7	sc1	sc2	sess	True	True	Schaefer_7_200	cerebellum_suit	crossed	all	True	0.1	0.145955870027577	-1576.16401913969	0.206192914360851	-0.587614171278299	0.579660425744557	0.159320851489115	Tue Mar 1 16:19:14 2022
12.5481217771558	s25	200	WTA_Schaefer_7_200	glm7	sc1	sc2	sess	True	True	Schaefer_7_200	cerebellum_suit	crossed	all	True	0.1	0.247238907092171	-1899.6170658062	0.280142802216838	-0.439714395566324	0.590400796993696	0.180801593987392	Tue Mar 1 16:19:16 2022
13.034002945454	s26	200	WTA_Schaefer_7_200	glm7	sc1	sc2	sess	True	True	Schaefer_7_200	cerebellum_suit	crossed	all	True	0.1	0.26079970232486	-1932.54020253589	0.379621975955543	-0.240756048088914	0.494564727888962	-0.010870544222077	Tue Mar 1 16:19:18 2022
13.5829498182855	s27	200	WTA_Schaefer_7_200	glm7	sc1	sc2	sess	True	True	Schaefer_7_200	cerebellum_suit	crossed	all	True	0.1	0.286384217318915	-1925.0860611602	0.361738248230639	-0.276523503538723	0.622545627702134	0.245091255404268	Tue Mar 1 16:19:19 2022
10.4197028254593	s28	200	WTA_Schaefer_7_200	glm7	sc1	sc2	sess	True	True	Schaefer_7_200	cerebellum_suit	crossed	all	True	0.1	0.156858747500904	-1097.05577243191	0.187533468804654	-0.624933062390691	0.474456127903379	-0.051087744193242	Tue Mar 1 16:19:21 2022
16.7547266414986	s29	200	WTA_Schaefer_7_200	glm7	sc1	sc2	sess	True	True	Schaefer_7_200	cerebellum_suit	crossed	all	True	0.1	0.176990323616345	-1762.10652492497	0.208071450849161	-0.583857098301678	0.446125537345055	-0.107748925309889	Tue Mar 1 16:19:22 2022
14.6972346565521	s30	200	WTA_Schaefer_7_200	glm7	sc1	sc2	sess	True	True	Schaefer_7_200	cerebellum_suit	crossed	all	True	0.1	0.099104301920259	-1468.17477408524	0.070360485085245	-0.859279029829511	0.457102143153631	-0.085795713692738	Tue Mar 1 16:19:24 2022
11.8016191399455	s31	200	WTA_Schaefer_7_200	glm7	sc1	sc2	sess	True	True	Schaefer_7_200	cerebellum_suit	crossed	all	True	0.1	0.127406623680897	-1290.44064137704	0.113204759286153	-0.773590481427694	0.458173777788536	-0.083652444422929	Tue Mar 1 16:19:25 2022
10.0672855747597	s02	100	WTA_Schaefer_7_100	glm7	sc1	sc2	sess	True	True	Schaefer_7_100	cerebellum_suit	crossed	all	True	0.1	0.220996774121306	-1538.62134232524	0.250541465626943	-0.498917068746113	0.54536773329912	0.090735466598239	Tue Mar 1 16:18:12 2022
10.8679855672446	s03	100	WTA_Schaefer_7_100	glm7	sc1	sc2	sess	True	True	Schaefer_7_100	cerebellum_suit	crossed	all	True	0.1	0.28037232798258	-1717.22800411001	0.269163903291232	-0.461672193417536	0.641854480456425	0.28370896091285	Tue Mar 1 16:18:13 2022
10.4742924740091	s04	100	WTA_Schaefer_7_100	glm7	sc1	sc2	sess	True	True	Schaefer_7_100	cerebellum_suit	crossed	all	True	0.1	0.084051704637844	-1320.10508254036	0.129791907993994	-0.740416184012013	0.494921789232033	-0.010156421535934	Tue Mar 1 16:18:15 2022
10.5283542179303	s06	100	WTA_Schaefer_7_100	glm7	sc1	sc2	sess	True	True	Schaefer_7_100	cerebellum_suit	crossed	all	True	0.1	0.399002146498793	-1683.54864258665	0.438928642287505	-0.12214271542499	0.772824689762611	0.545649379525221	Tue Mar 1 16:18:16 2022
9.5282910910898	s08	100	WTA_Schaefer_7_100	glm7	sc1	sc2	sess	True	True	Schaefer_7_100	cerebellum_suit	crossed	all	True	0.1	0.218978302354129	-968.378095555982	0.216358495364167	-0.567283009271665	0.537294603625109	0.074589207250217	Tue Mar 1 16:18:17 2022
11.3386952813756	s09	100	WTA_Schaefer_7_100	glm7	sc1	sc2	sess	True	True	Schaefer_7_100	cerebellum_suit	crossed	all	True	0.1	0.281445638740179	-1327.56674850248	0.372356589815305	-0.255286820369391	0.680359516486166	0.360719032972332	Tue Mar 1 16:18:19 2022
10.6888480661987	s10	100	WTA_Schaefer_7_100	glm7	sc1	sc2	sess	True	True	Schaefer_7_100	cerebellum_suit	crossed	all	True	0.1	0.324515775718245	-1617.32059574764	0.299251181934321	-0.401497636131359	0.743847433455039	0.487694866910078	Tue Mar 1 16:18:20 2022
11.5815206934305	s12	100	WTA_Schaefer_7_100	glm7	sc1	sc2	sess	True	True	Schaefer_7_100	cerebellum_suit	crossed	all	True	0.1	0.240587107349554	-1373.11552303315	0.24555591625875	-0.5088881674825	0.695807686170915	0.39161537234183	Tue Mar 1 16:18:22 2022
8.4069713759347	s14	100	WTA_Schaefer_7_100	glm7	sc1	sc2	sess	True	True	Schaefer_7_100	cerebellum_suit	crossed	all	True	0.1	0.135865645978075	-924.912260644288	0.333939338007503	-0.332121323984993	0.779408107433957	0.558816214867914	Tue Mar 1 16:18:23 2022
11.1533258110806	s15	100	WTA_Schaefer_7_100	glm7	sc1	sc2	sess	True	True	Schaefer_7_100	cerebellum_suit	crossed	all	True	0.1	0.287988260561607	-1229.96191590191	0.281911854547391	-0.436176290905218	0.672250576371753	0.344501152743506	Tue Mar 1 16:18:25 2022
14.404111263657	s17	100	WTA_Schaefer_7_100	glm7	sc1	sc2	sess	True	True	Schaefer_7_100	cerebellum_suit	crossed	all	True	0.1	0.353009176843155	-1759.13697151114	0.403711442324702	-0.192577115350598	0.690334301764978	0.380668603529956	Tue Mar 1 16:18:26 2022
8.60718805473952	s18	100	WTA_Schaefer_7_100	glm7	sc1	sc2	sess	True	True	Schaefer_7_100	cerebellum_suit	crossed	all	True	0.1	0.167879516779383	-1069.88602469948	0.215557982278809	-0.568884035442381	0.638774781265289	0.277549562530578	Tue Mar 1 16:18:28 2022
7.59512618877497	s19	100	WTA_Schaefer_7_100	glm7	sc1	sc2	sess	True	True	Schaefer_7_100	cerebellum_suit	crossed	all	True	0.1	0.211375439936865	-895.332682857928	0.254240109492353	-0.491519781015295	0.569637069275945	0.13927413855189	Tue Mar 1 16:18:29 2022
13.6718170750355	s20	100	WTA_Schaefer_7_100	glm7	sc1	sc2	sess	True	True	Schaefer_7_100	cerebellum_suit	crossed	all	True	0.1	0.259683294079462	-1785.73243846866	0.325037423570484	-0.349925152859032	0.487299080423249	-0.025401839153503	Tue Mar 1 16:18:30 2022
10.1503650331735	s21	100	WTA_Schaefer_7_100	glm7	sc1	sc2	sess	True	True	Schaefer_7_100	cerebellum_suit	crossed	all	True	0.1	0.120144094626625	-1187.85636091219	0.195871779559683	-0.608256440880633	0.312098237275133	-0.375803525449733	Tue Mar 1 16:18:32 2022
14.8251395189709	s22	100	WTA_Schaefer_7_100	glm7	sc1	sc2	sess	True	True	Schaefer_7_100	cerebellum_suit	crossed	all	True	0.1	0.41467780025303	-2438.73040191203	0.445329703945649	-0.109340592108703	0.746820766902146	0.493641533804292	Tue Mar 1 16:18:33 2022
12.5047448037808	s24	100	WTA_Schaefer_7_100	glm7	sc1	sc2	sess	True	True	Schaefer_7_100	cerebellum_suit	crossed	all	True	0.1	0.139230636398903	-1456.02182282081	0.206192914360851	-0.587614171278299	0.56739424698277	0.134788493965539	Tue Mar 1 16:18:35 2022
11.4553484722492	s25	100	WTA_Schaefer_7_100	glm7	sc1	sc2	sess	True	True	Schaefer_7_100	cerebellum_suit	crossed	all	True	0.1	0.238889827654512	-1616.79281313981	0.280142802216838	-0.439714395566324	0.571876517152724	0.143753034305448	Tue Mar 1 16:18:36 2022
12.0275896570753	s26	100	WTA_Schaefer_7_100	glm7	sc1	sc2	sess	True	True	Schaefer_7_100	cerebellum_suit	crossed	all	True	0.1	0.236292809893267	-1679.57583134815	0.379621975955543	-0.240756048088914	0.475710442028405	-0.048579115943191	Tue Mar 1 16:18:37 2022
12.7607095455188	s27	100	WTA_Schaefer_7_100	glm7	sc1	sc2	sess	True	True	Schaefer_7_100	cerebellum_suit	crossed	all	True	0.1	0.28274560486601	-1759.2985002022	0.361738248230639	-0.276523503538723	0.622932268281914	0.245864536563829	Tue Mar 1 16:18:39 2022
8.83217171603429	s28	100	WTA_Schaefer_7_100	glm7	sc1	sc2	sess	True	True	Schaefer_7_100	cerebellum_suit	crossed	all	True	0.1	0.141707432412285	-810.03421100751	0.187533468804654	-0.624933062390691	0.485709993831786	-0.028580012336429	Tue Mar 1 16:18:40 2022
15.3214618372684	s29	100	WTA_Schaefer_7_100	glm7	sc1	sc2	sess	True	True	Schaefer_7_100	cerebellum_suit	crossed	all	True	0.1	0.16781470254042	-1504.19839180595	0.208071450849161	-0.583857098301678	0.397709783849134	-0.204580432301732	Tue Mar 1 16:18:42 2022
13.8127707313254	s30	100	WTA_Schaefer_7_100	glm7	sc1	sc2	sess	True	True	Schaefer_7_100	cerebellum_suit	crossed	all	True	0.1	0.087119903487276	-1330.58025678685	0.070360485085245	-0.859279029829511	0.405991547914452	-0.188016904171096	Tue Mar 1 16:18:43 2022
10.7286135530919	s31	100	WTA_Schaefer_7_100	glm7	sc1	sc2	sess	True	True	Schaefer_7_100	cerebellum_suit	crossed	all	True	0.1	0.123159180434714	-1094.38778604741	0.113204759286153	-0.773590481427694	0.43733947704258	-0.125321045914841	Tue Mar 1 16:18:44 2022
